# Supplementary material for: The Residential Population Generator (RPGen): Parameterization of Residential, Demographic, and Physiological Data to Model Intraindividual Exposure, Dose, and Risk
Source: MDPI journal article supplement (doi:10.3390/toxics9110303), 2021-11-12
Supplement: s1 [file s1]

# Supplementary Materials: The Residential Population Generator (RPGen): Parameterization of Residential, Demographic, and Physiological Data to Model Intraindividual Exposure, Dose, and Risk

Alexander East, Daniel Dawson, Graham Glen, Kristin Isaacs, Kathie Dionisio, Paul S. Price, Elaine A. Cohen Hubal and Daniel A. Vallero

The code and documentation used in this analysis is available at <https://github.com/orgs/HumanExposure/repositories>. In addition to other modules, this repository contains project files and scripts for RPGen, the Product Use Scheduler (PUS), and Source-to-Dose (S2D), which are the components of the Combined Human Exposure Model (CHEM), in addition to the high-throughput version of the Stochastic Human Exposure Model (SHEDS-HT).

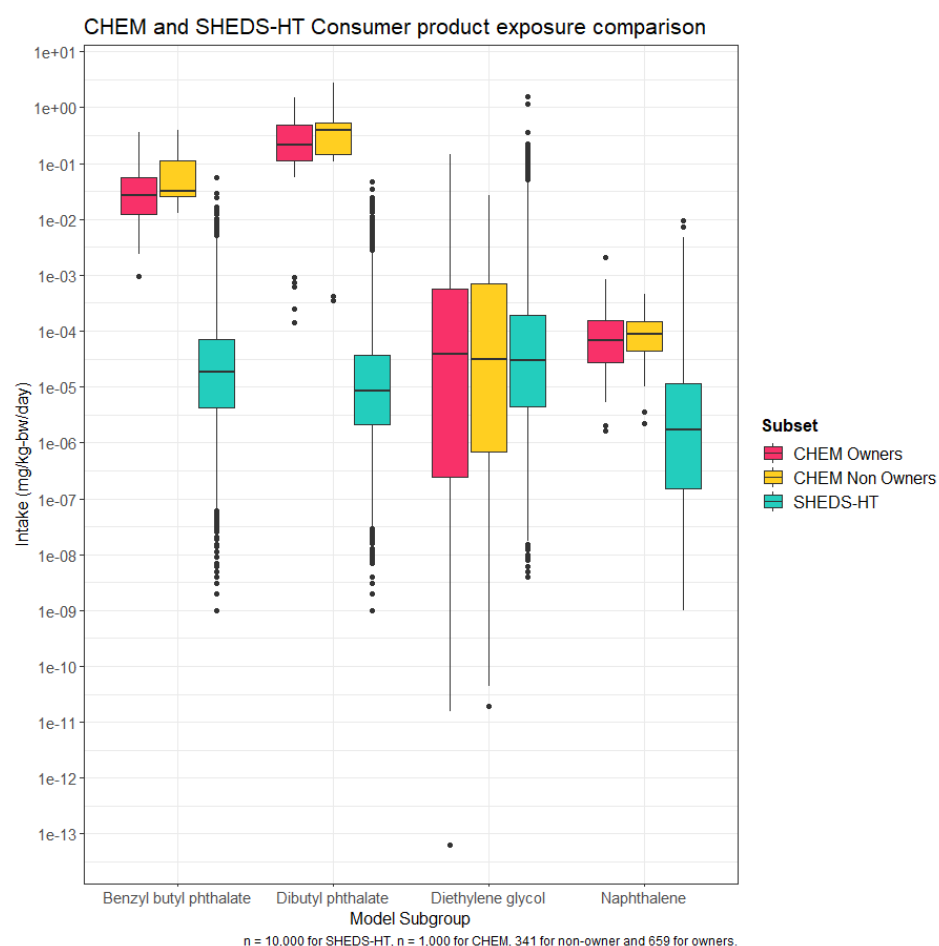

**Figure S1.** Four Chemicals not used as principal case example for application of RPGen: Benzyl Butyl Pthalate, Dibutyl Pthalate, Diethylene Glycol, Naphthalene daily intakes compared to SHEDS-HT.

In the 1000 individual RPGen population used in this analysis, the four chemicals in Figure 1 were ran through CHEM in addition to toluene. However, these chemicals were

omitted due to relatively infrequent exposure counts in CHEM. Table 1 shows the percentage of individuals exposed to each chemical in Figure 1. Exposure occurred more frequently in SHEDS-HT than CHEM across all subsets. Toluene was selected for the case study given the relatively high exposure frequencies of 69.5%, considering only homeowner product use categories (PUCS), 78.5% among owners, and 36.4% among non-owners. Given the high count of non-exposures, the boxplots in Figure 1 are potentially misleading, as few exposures for naphthalene, diethylene glycol, dibutyl phthalate, and benzyl butyl phthalate create the boxplots. “zeros” are not represented, causing distributions orders of magnitude higher than SHEDS-HT. Whereas over 5000 simulated exposures are used to create the SHEDS-HT distributions, as few as 17 are used to create the CHEM distributions. Summary statistics for each model subset output is provided in Table 2 below.

**Table S1.** Percentage of Individuals Exposed Across Exposure Model Scenario (Subset).

| Name                   | Subset              | Exposed | Houses | % Exposed |
|------------------------|---------------------|---------|--------|-----------|
| Diethylene glycol      | SHEDS-HT            | 9998    | 10000  | 99.98%    |
| Toluene                | SHEDS-HT            | 9437    | 10000  | 94.4%     |
| Naphthalene            | SHEDS-HT            | 5512    | 10000  | 55.1%     |
| Dibutyl phthalate      | SHEDS-HT            | 5227    | 10000  | 52.3%     |
| Benzyl butyl phthalate | SHEDS-HT            | 5170    | 10000  | 51.7%     |
| Toluene                | Homeowner PUCS Only | 458     | 659    | 69.5%     |
| Benzyl butyl phthalate | Homeowner PUCS Only | 17      | 659    | 2.6%      |
| Naphthalene            | Homeowner PUCS Only | 17      | 659    | 2.6%      |
| Diethylene glycol      | Homeowner PUCS Only | 16      | 659    | 2.4%      |
| Dibutyl phthalate      | Homeowner PUCS Only | 1       | 659    | 0.2%      |
| Toluene                | CHEM Owners         | 517     | 659    | 78.5%     |
| Diethylene glycol      | CHEM Owners         | 266     | 659    | 40.4%     |
| Naphthalene            | CHEM Owners         | 83      | 659    | 12.6%     |
| Dibutyl phthalate      | CHEM Owners         | 54      | 659    | 8.2%      |
| Benzyl butyl phthalate | CHEM Owners         | 32      | 659    | 4.9%      |
| Diethylene glycol      | CHEM Non Owners     | 124     | 341    | 36.4%     |
| Toluene                | CHEM Non Owners     | 102     | 341    | 29.9%     |
| Naphthalene            | CHEM Non Owners     | 40      | 341    | 11.7%     |
| Dibutyl phthalate      | CHEM Non Owners     | 28      | 341    | 8.2%      |
| Benzyl butyl phthalate | CHEM Non Owners     | 17      | 341    | 5.0%      |

**Table S2.** Summaries of Daily Intake (mg/kg-bw/day) across Exposure Model Scenario (Subset).

| Name                   | Subset              | Mean       | Median      | 95th Percentile |
|------------------------|---------------------|------------|-------------|-----------------|
| Benzyl butyl phthalate | SHEDS-HT            | 0.0000922  | 0.000000331 | 0.000264        |
| Dibutyl phthalate      | SHEDS-HT            | 0.000103   | 0.000000224 | 0.000166        |
| Diethylene glycol      | SHEDS-HT            | 0.00138    | 0.0000303   | 0.00327         |
| Naphthalene            | SHEDS-HT            | 0.0000191  | 7.5E-09     | 0.0000568       |
| Toluene                | SHEDS-HT            | 0.0233     | 0.000087    | 0.0147          |
| Dibutyl phthalate      | Homeowner PUCS Only | 0.000144   | 0           | 0               |
| Benzyl butyl phthalate | Homeowner PUCS Only | 0.000609   | 0           | 0               |
| Toluene                | Homeowner PUCS Only | 0.0626     | 0.00441     | 0.353           |
| Diethylene glycol      | Homeowner PUCS Only | 0.000384   | 0           | 0               |
| Naphthalene            | Homeowner PUCS Only | 0.00000829 | 0           | 0               |
| Dibutyl phthalate      | CHEM Owners         | 0.0265     | 0           | 0.152           |
| Benzyl butyl phthalate | CHEM Owners         | 0.00221    | 0           | 0               |
| Toluene                | CHEM Owners         | 0.0671     | 0.00585     | 0.375           |
| Diethylene glycol      | CHEM Owners         | 0.00104    | 0           | 0.00337         |
| Naphthalene            | CHEM Owners         | 0.0000169  | 0           | 0.0000842       |
| Dibutyl phthalate      | CHEM Non-owners     | 0.0439     | 0           | 0.244           |

|                        |                 |          |   |           |
|------------------------|-----------------|----------|---|-----------|
| Benzyl butyl phthalate | CHEM Non-owners | 0.00498  | 0 | 0         |
| Toluene                | CHEM Non-owners | 0.00406  | 0 | 0.0139    |
| Diethylene glycol      | CHEM Non-owners | 0.000457 | 0 | 0.00182   |
| Naphthalene            | CHEM Non-owners | 0.000013 | 0 | 0.0000999 |

Toluene was selected given the prevalence of the chemical in products associated with home ownership. In CHEM, the likelihood of exposure is a function of the probability of being assigned a product use category times the probability of a product being selected which contains the chemical of interest. Therefore, CHEM is best used for chemicals occurring in many products and product use categories. A composition of Product Use Category Identifiers (PUCIDs) with regards to case example chemicals and home ownership classification is presented in Table 3 below. Table 4 provides counts of the number of PUCS and products containing each chemical.

**Table S3.** Counts of Chemicals, Products, Case Example Chemicals, and Ownership Status by PUCID in CHEM.

| PUCID             | Total Chemicals | Total Products | Description                                                    | Case Example Chemicals | Homeownership |
|-------------------|-----------------|----------------|----------------------------------------------------------------|------------------------|---------------|
| CP.0100.010.099.F | 139             | 128            | air freshener, air freshener NOC                               | Toluene                | No            |
| VE.0100.030.099.F | 56              | 75             | auto body work, detailing NOC                                  | Toluene                | No            |
| AC.0500.010.099.F | 41              | 44             | general arts and crafts supplies, arts and crafts adhesive NOC | Toluene                | No            |
| VE.0100.030.050.F | 20              | 20             | auto body work, detailing spray                                | Toluene                | No            |
| HM.1400.020.099.F | 15              | 6              | paint/stain and related products, paint cleaner NOC            | Toluene                | Yes           |
| HM.1400.070.099.F | 15              | 15             | paint/stain and related products, stripper NOC                 | Toluene                | Yes           |
| CP.1600.010.099.F | 14              | 20             | shoes, shoe polish or protectant NOC                           | Toluene                | No            |
| HM.0600.010.050.F | 13              | 6              | corrosion protection, corrosion protection spray               | Toluene                | Yes           |
| VE.0100.010.050.F | 12              | 15             | auto body work, auto paint spray                               | Toluene                | No            |
| VE.0500.020.050.F | 11              | 6              | engine maintenance, auto fluids and additives spray            | Toluene                | No            |
| HM.1400.040.099.F | 10              | 7              | paint/stain and related products, paint thinner NOC            | Toluene                | Yes           |
| AC.0500.030.050.F | 10              | 2              | general arts and crafts supplies, arts and crafts finish spray | Toluene                | No            |
| AC.0600.010.099.F | 7               | 5              | gun cleaner, gun cleaner NOC                                   | Toluene                | No            |
| AC.0500.030.099.F | 6               | 3              | general arts and crafts supplies, arts                         | Toluene                | No            |

|                   |    |     |                                                                           |                                               |     |
|-------------------|----|-----|---------------------------------------------------------------------------|-----------------------------------------------|-----|
|                   |    |     | and crafts finish<br>NOC                                                  |                                               |     |
| HM.1400.050.050.F | 5  | 4   | paint/stain and<br>related products,<br>primer spray                      | Toluene                                       | Yes |
| HM.0100.030.099.F | 3  | 3   | adhesives and<br>adhesive removers,<br>wood adhesive NOC                  | Toluene                                       | Yes |
| HM.0800.010.099.F | 28 | 14  | finish, finish NOC                                                        | Naphthalene,<br>Toluene                       | Yes |
| VE.0400.040.099.F | 10 | 16  | car surface treatment,<br>degreaser NOC                                   | Naphthalene,<br>Toluene                       | No  |
| VE.0500.050.099.F | 7  | 44  | engine maintenance,<br>motor oil NOC                                      | Naphthalene,<br>Toluene                       | No  |
| VE.0500.020.099.F | 59 | 68  | engine maintenance,<br>auto fluids and<br>additives NOC                   | Diethylene glycol,<br>Naphthalene,<br>Toluene | No  |
| LY.0200.010.099.F | 26 | 20  | grill/camping fuel,<br>grill/camping fuel<br>NOC                          | Diethylene glycol,<br>Naphthalene,<br>Toluene | Yes |
| VE.0200.040.099.F | 22 | 3   | boat care and<br>maintenance, boat<br>engine fluids NOC                   | Diethylene glycol,<br>Naphthalene,<br>Toluene | Yes |
| AC.0700.020.099.F | 69 | 88  | home office, pens<br>and markers NOC                                      | Diethylene glycol                             | No  |
| CP.1200.060.099.F | 67 | 194 | laundry and fabric<br>treatment, laundry<br>detergent NOC                 | Diethylene glycol                             | No  |
| CP.1200.060.052.F | 44 | 116 | laundry and fabric<br>treatment, laundry<br>detergent liquid              | Diethylene glycol                             | No  |
| CP.1100.010.099.F | 32 | 26  | lamp oil/lighter fluid,<br>lamp oil/lighter fluid<br>NOC                  | Diethylene glycol                             | No  |
| HM.1400.010.041.F | 14 | 85  | paint/stain and<br>related products,<br>paint interior                    | Diethylene glycol                             | Yes |
| VE.0500.010.099.F | 7  | 21  | engine maintenance,<br>antifreeze NOC                                     | Diethylene glycol                             | No  |
| CP.1200.030.099.F | 5  | 12  | laundry and fabric<br>treatment, fabric<br>deodorizer NOC                 | Diethylene glycol                             | No  |
| HM.0100.020.099.F | 58 | 65  | adhesives and<br>adhesive removers,<br>multipurpose<br>adhesive NOC       | Dibutyl phthalate,<br>Toluene                 | Yes |
| HM.1400.010.050.F | 39 | 126 | paint/stain and<br>related products,<br>paint spray                       | Dibutyl phthalate,<br>Toluene                 | Yes |
| VE.0100.020.099.F | 30 | 16  | auto body work,<br>body repair NOC                                        | Dibutyl phthalate,<br>Toluene                 | No  |
| AC.0500.010.050.F | 15 | 8   | general arts and<br>crafts supplies, arts<br>and crafts adhesive<br>spray | Dibutyl phthalate,<br>Toluene                 | No  |

|                   |    |     |                                                             |                                                                 |     |
|-------------------|----|-----|-------------------------------------------------------------|-----------------------------------------------------------------|-----|
| CP.0300.040.099.F | 7  | 7   | carpet and floor, floor polish NOC                          | Dibutyl phthalate                                               | No  |
| HM.0400.010.099.F | 40 | 31  | caulk/sealant, caulk/sealant NOC                            | Benzyl butyl phthalate, Toluene                                 | Yes |
| HM.0800.010.050.F | 13 | 5   | finish, finish spray                                        | Benzyl butyl phthalate, Toluene                                 | Yes |
| HM.2000.040.050.F | 6  | 1   | surface sealers, surface sealer spray                       | Benzyl butyl phthalate, Toluene                                 | Yes |
| AC.0500.040.099.F | 52 | 93  | general arts and crafts supplies, arts and crafts paint NOC | Benzyl butyl phthalate, Naphthalene, Toluene                    | No  |
| VE.0100.010.099.F | 22 | 35  | auto body work, auto paint NOC                              | Benzyl butyl phthalate, Naphthalene, Toluene                    | No  |
| HM.1400.050.099.F | 16 | 8   | paint/stain and related products, primer NOC                | Benzyl butyl phthalate, Naphthalene, Toluene                    | Yes |
| EL.0300.050.099.F | 31 | 169 | computers and accessories/supplies, printer ink NOC         | Benzyl butyl phthalate, Diethylene glycol, Toluene              | No  |
| HM.1400.010.040.F | 23 | 57  | paint/stain and related products, paint exterior            | Benzyl butyl phthalate, Diethylene glycol, Toluene              | Yes |
| HM.1400.010.099.F | 30 | 87  | paint/stain and related products, paint NOC                 | Benzyl butyl phthalate, Diethylene glycol, Naphthalene, Toluene | Yes |
| HM.2100.010.099.F | 6  | 2   | tiling, grout sealer NOC                                    | Benzyl butyl phthalate                                          | Yes |
| HM.1500.020.099.F | 5  | 3   | patch and repair, putty or filler NOC                       | Benzyl butyl phthalate                                          | Yes |

Table S4. Counts of Products, PUCS, and 'Homeowner PUCS' by Chemical in CHEM.4

| Name    | Products | PUCS | Homeowner PUCS | PUC Names                                                                                                                                                                                                                                                                                                                         | Uses                                                                                                                                                                                                                                                                                                                                                                              |
|---------|----------|------|----------------|-----------------------------------------------------------------------------------------------------------------------------------------------------------------------------------------------------------------------------------------------------------------------------------------------------------------------------------|-----------------------------------------------------------------------------------------------------------------------------------------------------------------------------------------------------------------------------------------------------------------------------------------------------------------------------------------------------------------------------------|
| Toluene | 229      | 35   | 17             | HM.0100.020.099.F, HM.0100.030.099.F, HM.0400.010.099.F, HM.0600.010.050.F, HM.0800.010.050.F, HM.0800.010.099.F, HM.1400.010.040.F, HM.1400.010.050.F, HM.1400.010.099.F, HM.1400.020.099.F, HM.1400.040.099.F, HM.1400.050.050.F, HM.1400.050.099.F, HM.1400.070.099.F, HM.2000.040.050.F, LY.0200.010.099.F, VE.0200.040.099.F | paint/stain and related products, primer, general arts and crafts supplies, arts and crafts finish, general arts and crafts supplies, arts and crafts paint, auto body work, auto paint, adhesives and adhesive removers, multipurpose adhesive, paint/stain and related products, paint spray, corrosion protection, corrosion protection spray, engine maintenance, auto fluids |

---

and additives,  
paint/stain and re-  
lated products, paint  
NOC, auto body  
work, body repair,  
shoes , shoe polish or  
protectant NOC,  
grill/camping fuel ,  
grill/camping fuel  
NOC, auto body  
work , auto paint  
spray, finish , finish  
NOC, engine mainte-  
nance , auto fluids  
and additives spray,  
engine maintenance ,  
motor oil NOC,  
general arts and  
crafts supplies , arts  
and crafts adhesive  
spray, surface sealers  
, surface sealer spray,  
car surface treatment  
, degreaser NOC,  
paint/stain and re-  
lated products , strip-  
per NOC, paint/stain  
and related products  
, paint cleaner NOC,  
finish , finish spray,  
paint/stain and re-  
lated products , pri-  
mer spray, general  
arts and crafts sup-  
plies , arts and crafts  
adhesive NOC,  
paint/stain and re-  
lated products , paint  
thinner NOC, auto  
body work , detailing  
NOC, paint/stain and  
related products ,  
paint exterior, gen-  
eral arts and crafts  
supplies , arts and  
crafts finish spray,  
adhesives and adhe-  
sive removers , wood  
adhesive NOC, boat  
care and maintenance  
, boat engine fluids  
NOC, auto body  
work , detailing  
spray, gun cleaner ,  
gun cleaner NOC,  
computers and acces-  
sories/supplies ,

---

|                        |     |    |   |                                                                                                                                                        |                                                                                                                                                                                                                                                                                                                                                                                                                                                                                                                                                                        |
|------------------------|-----|----|---|--------------------------------------------------------------------------------------------------------------------------------------------------------|------------------------------------------------------------------------------------------------------------------------------------------------------------------------------------------------------------------------------------------------------------------------------------------------------------------------------------------------------------------------------------------------------------------------------------------------------------------------------------------------------------------------------------------------------------------------|
|                        |     |    |   |                                                                                                                                                        | printer ink NOC, air freshener , air freshener NOC, caulk/sealant , caulk/sealant NOC                                                                                                                                                                                                                                                                                                                                                                                                                                                                                  |
| Benzyl butyl phthalate | 27  | 11 | 8 | HM.0400.010.099.F, HM.0800.010.050.F, HM.1400.010.040.F, HM.1400.010.099.F, HM.1400.050.099.F, HM.1500.020.099.F, HM.2000.040.050.F, HM.2100.010.099.F | general arts and crafts supplies, arts and crafts paint NOC, finish , finish spray, auto body work , auto paint NOC, paint/stain and related products , primer NOC, patch and repair , putty or filler NOC, caulk/sealant , caulk/sealant NOC, surface sealers , surface sealer spray, tiling , grout sealer NOC, paint/stain and related products , paint exterior, computers and accessories/supplies , printer ink NOC, paint/stain and related products , paint NOC                                                                                                |
| Diethylene glycol      | 211 | 13 | 5 | HM.1400.010.040.F, HM.1400.010.041.F, HM.1400.010.099.F, LY.0200.010.099.F, VE.0200.040.099.F                                                          | computers and accessories/supplies , printer ink NOC, laundry and fabric treatment , laundry detergent liquid, laundry and fabric treatment , laundry detergent NOC, paint/stain and related products , paint NOC, grill/camping fuel , grill/camping fuel NOC, paint/stain and related products , paint interior, engine maintenance , auto fluids and additives NOC, engine maintenance , anti-freeze NOC, home office , pens and markers NOC, paint/stain and related products , paint exterior, lamp oil/lighter fluid , lamp oil/lighter fluid NOC, boat care and |

|                   |    |    |   |                                                                                                           |  |                                                                                                                                                                                                                                                                                                                                                                                                                                                                                                                       |
|-------------------|----|----|---|-----------------------------------------------------------------------------------------------------------|--|-----------------------------------------------------------------------------------------------------------------------------------------------------------------------------------------------------------------------------------------------------------------------------------------------------------------------------------------------------------------------------------------------------------------------------------------------------------------------------------------------------------------------|
|                   |    |    |   |                                                                                                           |  | maintenance , boat<br>engine fluids NOC,<br>laundry and fabric<br>treatment , fabric de-<br>odorizer NOC                                                                                                                                                                                                                                                                                                                                                                                                              |
|                   |    |    |   |                                                                                                           |  | general arts and<br>crafts supplies, arts<br>and crafts paint<br>NOC, engine mainte-<br>nance, auto fluids<br>and additives NOC,<br>auto body work ,<br>auto paint NOC,<br>paint/stain and re-<br>lated products , paint<br>NOC, boat care and<br>maintenance , boat<br>engine fluids NOC,<br>car surface treatment<br>, degreaser NOC,<br>grill/camping fuel ,<br>grill/camping fuel<br>NOC, finish , finish<br>NOC, paint/stain and<br>related products , pri-<br>mer NOC, engine<br>maintenance , motor<br>oil NOC |
| Naphthalene       | 46 | 10 | 5 | HM.0800.010.099.F,<br>HM.1400.010.099.F,<br>HM.1400.050.099.F,<br>LY.0200.010.099.F,<br>VE.0200.040.099.F |  | carpet and floor, floor<br>polish NOC, auto<br>body work, body re-<br>pair NOC, adhe-<br>sives and adhesive<br>removers , multipur-<br>pose adhesive NOC,<br>paint/stain and re-<br>lated products , paint<br>spray, general arts<br>and crafts supplies ,<br>arts and crafts adhe-<br>sive spray                                                                                                                                                                                                                     |
| Dibutyl phthalate | 6  | 5  | 2 | HM.0100.020.099.F,<br>HM.1400.010.050.F                                                                   |  |                                                                                                                                                                                                                                                                                                                                                                                                                                                                                                                       |
