# Supplementary material for: The Residential Population Generator (RPGen): Parameterization of Residential, Demographic, and Physiological Data to Model Intraindividual Exposure, Dose, and Risk
Source: Toxics. 2021 Nov 12;9(11):303. doi: 10.3390/toxics9110303 (PMC8625086; doi:10.3390/toxics9110303)
Supplement: Supplementary file 1 [file toxics-09-00303-s001.zip]

Archive with 4 entries (4 files):
- AllAges5000.csv
- CaseExample1000.csv
- Children5000.csv
- toxics-1434650 supplementary for proof.pdf
