# Supplementary material for: The Residential Population Generator (RPGen): Parameterization of Residential, Demographic, and Physiological Data to Model Intraindividual Exposure, Dose, and Risk
Source: Toxics. 2021 Nov 12;9(11):303. doi: 10.3390/toxics9110303 (PMC8625086; doi:10.3390/toxics9110303)
Supplement: Supplementary file 1 [file toxics-09-00303-s001.zip › AllAges5000.csv]

gender	reth	pool	compid	recno	race	ethnicity	age	pwgtp	ages	genders	commute	cars	state	row	age_months	temp_age_months	age_years	num	mean_logh	mean_logbw	logbw_resid	logh_resid	weight	height	Blood_mass	Brain_mass	Gonads_mass	Heart_mass	Kidneys_mass	Large_intestine_mass	Liver_mass	Lung_mass	Muscle_mass	Pancreas_mass	Skeleton_mass	Skin_mass	Small_intestine_mass	Spleen_mass	Stomach_mass	org_mass_sum	Adipose_flow	Brain_flow	CO	Gonads_flow	Heart_flow	Kidneys_flow	Large_intestine_flow	Liver_flow	Lung_flow
Male	Non-Hispanic White	225	14800700	2014001453985	W	N	45	7	4546	MF	60	4	48	1	543	543	45	1	5.18444596413622	4.54807244567089	-0.278327442886546	-0.0732547775036419	71.5034001263757	165.867816769506	2.69849626897878	3.76610827231994	0.148200647455363	0.713318188772801	0.581112460000374	0.536697830308589	4.09245595561132	7.33517252042499	2.69849626897878	0.20841745051922	24.9678143090227	2.69849639219615	1.62802509263093	7.335273372129	0.328090880412883	25.497498235725	32.7234978236258	84.5107628450014	254.597630900274	0.349833293601054	26.0894132217957	134.094030943786	27.5639766739725	46.6100274807313	17.1757689268806
Female	Non-Hispanic White	43	10600106	2015000234827	W	N	82	18	8282	FM	NA	1	06	2	993	993	82	2	5.02116295357938	4.00436566042283	0.372147584163534	-0.0261603550155708	79.560142460311	147.673329121543	3.60138558239942	4.38172454721809	0.3097736037271	1.00843174256212	0.993260575816856	1.04271210168088	3.4914410296258	9.78915381261877	3.60138558243423	0.394275828347823	18.5773395827034	3.60138558239942	1.47844118597947	9.78958098095935	0.431707889899055	21.0915368932265	69.2519326373889	102.131563380734	224.358105262762	0.157282814412107	42.046475861933	134.699040583535	40.9728950150755	49.8194306627201	20.2000011396941
Female	Other Hispanic	58	10602904	2015000255845	W	O	13	28	1381734936	FFFFMM	NA	0	06	3	159	159	13	3	5.05251624865465	3.99874472034604	-0.134455649622864	-0.0121533030387678	47.669370831964	154.526089415992	2.29020767432861	3.29466650856867	0.20276174865526	0.612101577413447	0.430615732655433	0.563185199482759	2.54537387520806	6.22313683947842	2.29020767432866	0.160229971822226	11.3524619637264	2.29020767597062	1.43576217949455	6.22542990452491	0.331694963155816	19.8144315322307	45.2372909092374	67.8570772727397	232.122144913653	0.105647284901726	26.5693014999212	87.5540844828131	29.1492562312274	31.5937889263304	13.2901979415716
Female	Non-Hispanic Black	154	12500501	2017000494633	B	N	6	78	463839	FFFM	5	2	25	4	72	72	6	4	4.76497975676831	3.1346757713758	0.181837356112542	0.0157176979044317	27.5640703983635	119.187448905772	2.16553179737572	2.09018783784411	0.114551790036974	0.254321060559433	0.170599420457744	0.299532131274241	0.776601856191936	4.11224455547352	1.51546544997663	0.083380422612222	3.49724963821911	4.11224465495318	0.635855380746168	4.11224465495317	0.150903299445878	17.2201216167952	24.5779800173096	33.457510940743	191.046069705823	0.0542755755663421	14.6430955356468	46.6736547416901	13.8178697821507	20.2310593272687	7.22541138645422
Male	Non-Hispanic White	263	14935004	2018HU0505832	W	N	4	21	1373574	FMFFM	NA	6	49	5	59	59	4	5	4.69711570028628	2.95132278008263	0.279076123846555	0.0129363474202943	25.2897431370289	111.057940066353	1.37110970156228	1.9832179569691	0.0588877626401435	0.418093938093023	0.22653334921588	0.274652410986977	0.777151383206555	3.72686692614461	1.37123523216061	0.0502211477808302	3.79004746237592	3.72686702941601	0.664106739064836	3.72686702941601	0.123198250977006	17.4456875491802	11.9048765387588	29.2476690339396	188.449492502731	0.128640573410473	10.4038471166745	47.7417339742806	11.3597578047284	17.0603475775538	6.45928425233178
Female	Non-Hispanic Black	151	12401300	2014000408056	B	N	47	66	4347	MF	45	1	24	6	573	573	47	6	5.09820599262078	4.45306569958604	0.498715022545772	0.0186483865771027	141.426581267989	166.809823020008	5.20527825201749	6.92785236907731	0.51785989071449	1.50958085018305	1.59380954845292	1.54296843156339	7.19775523246841	14.1490183364224	5.20527825201749	0.630046255436534	34.1637009349337	5.20527825201749	2.833556269292	14.1494132837689	0.790165594227885	26.1698407694486	106.970610648299	153.578064548831	245.828046856989	0.28015224877197	64.8695916093218	221.519997226185	64.6461587458296	78.2896721970646	31.9900846510156
Female	Non-Hispanic White	155	12601200	2015001353911	W	N	48	16	12485217	MFMM	NA	3	26	7	577	577	48	7	5.10587243421857	4.30516065204582	0.135493018850376	0.0298024669721917	84.8303747014316	169.979000201026	3.40261530392109	4.16943760411359	0.324851386358204	0.880142344762077	0.921889926861114	1.22640436162134	5.89433840538713	9.24659935647722	3.40261530392109	0.573346473783082	22.4670160562219	3.40261530392109	2.19130899307931	9.2492672992991	0.508990111549951	23.9309331571145	70.2201576894787	104.65857885251	249.322611530503	0.188898429743204	40.527025836216	128.77946311907	42.6062032371612	51.5873003758828	21.2087233401816
Female	Non-Hispanic Black	55	10603729	2015001498766	B	N	73	80	7373	MF	60	1	06	8	885	885	73	8	5.0728163617004	4.33307136947901	-0.394302155585852	-0.0463048983352922	51.355354929774	152.400429785761	2.39496975814025	3.08019596573807	0.210933885544189	0.720965429289186	0.5938067770781	0.69469487005428	2.99509756575526	6.51020275013723	2.39496975814068	0.237145593873804	12.6681472389801	2.39496999813992	1.47265150525824	6.51020277326149	0.300688769185676	20.4430076851733	44.7697513760254	65.7177874696032	229.723200511984	0.115198961690566	28.077557006731	90.9698183146991	26.9739180974005	35.2989031992368	13.7545029492348
Male	Other Hispanic	200	13604101	2017001351742	W	O	59	32	602559	FFM	30	2	36	9	717	717	59	9	5.12996700464114	4.41949315866759	0.0567489387332166	-0.018919198321689	87.9037176077939	165.844036294867	3.13904421935552	4.34715849359701	0.172146055513149	1.26903799235768	0.890520799263568	0.858557787312002	6.91541781257729	8.53279844171832	3.13904421935552	0.479344412371613	27.5996626204708	3.13904421935552	2.11514528214647	8.53280686018501	0.666062311878437	27.0033384256821	41.0362925628331	97.5271478544116	254.570254156254	0.385253388689725	30.0053029819649	155.478149921171	34.0315823930493	56.6985330257454	19.9776821182264
Male	Non-Hispanic White	152	12601900	2016000208138	W	N	66	41	6066	FM	45	2	26	10	796	796	66	10	5.16420221292252	4.47568152613829	0.093679211885568	-0.0149603611124052	96.4824125169023	172.300811237905	3.38993859180584	4.50285546781703	0.190496404003628	1.26229080129004	0.985393129163006	1.00977266765735	8.2237648486888	9.21472254822645	3.38993859180584	0.559090779512385	29.7708027367344	3.38993859180584	2.19450770499048	9.21480843309258	0.421888308288594	27.4614042124892	41.6544968855686	109.795961806647	261.968005470549	0.45660388286249	35.8846269549165	175.905465600496	36.7433724197579	56.821885663261	22.2013862890754
Male	Non-Hispanic White	83	11208615	2014001392838	W	N	31	10	1132312	FFMM	NA	3	12	11	378	378	31	11	5.17788473569848	4.44133530257236	-0.12730286630592	-0.0151441216074162	74.7412715033236	174.642427835851	2.77494657067037	3.87629040089363	0.144515697949147	0.988204085980276	0.865466083734854	0.862890126193258	4.36966612219592	7.50390305123124	2.77494657067037	0.385419664734724	25.3378429451059	2.77494657067037	1.30009798183351	7.54308683799774	0.716159575644439	25.9343101208856	36.3983096369813	83.1706280671871	264.633659210271	0.403319045954195	30.1190731417399	142.978265500406	29.7609441422832	45.462749766413	18.3586066277373
Male	Mexican American	287	15151246	2018HU0699255	O	M	18	36	142416222523184656	MFFMMFMFM	NA	3	51	12	222	222	18	12	5.13555427157889	4.31831061391081	-0.0813204971315229	0.022973259758226	69.199256391567	173.908192617954	2.59759668403959	3.88616513991098	0.146459482009648	1.03707114951276	0.837213758730856	0.703891324053923	4.6224628107498	7.02882106686543	2.59759668403959	0.371718069086909	22.5774184783279	2.59759668403959	1.69697076279761	7.06099982877223	0.391345114375842	25.6397231012604	34.7550501404698	83.8693489927573	263.798786296366	0.328943551999128	25.3696116881981	126.539245125682	27.0906746965472	45.0960483225227	17.1310713134277
Male	Non-Hispanic Black	47	10605902	2016000463923	B	N	25	40	254655131781	MFMFFF	NA	2	06	13	307	307	25	13	5.18065823768476	4.45415006576005	-0.0858674781692428	-0.0369273620401583	78.9079976887202	171.353877235831	3.00476176301268	4.30833916036014	0.185516030243324	0.793302359527719	0.878988505725096	1.2380544046829	1.91755822819961	8.16515159757589	3.00476176301268	0.475868867027051	27.3452131772444	3.00476176301268	1.88250814745836	8.16778929924416	0.386973349585752	25.260983037006	41.9127346036673	95.116715390704	260.887465494406	0.387078800305465	29.5335457398272	144.382854752273	30.0430533262423	51.7951856268388	19.597617019172
Female	Other	222	14702001	2015000213030	N	N	12	122	12321015	FFMF	3	2	47	14	148	148	12	14	5.02068763671278	3.77698336424689	0.0358724267164707	0.0141663986818206	45.2795633701639	153.677159548713	2.099407728015	2.89994037355654	0.201655342412061	0.626671391694796	0.398524244529668	0.537428218657515	2.71672679851447	5.48645374093709	2.09940772799972	0.197790029584878	8.8476253930602	5.70678187754813	0.934385428357311	5.70678187754813	0.252743000900873	20.5677796954987	39.182216460595	60.4169719447157	231.165068400851	0.0935249514281125	23.1851888195446	83.9425178511996	23.6735334437505	30.1875432137699	12.1327432761082
Female	Mexican American	262	14802513	2018HU0845202	W	M	34	36	345280472	FMMFMMF	45	3	48	15	408	408	34	15	5.04777819975056	4.24824204338399	-0.318279166290273	-0.0252774628738357	50.9050878893176	151.790417459193	2.09404375960211	2.76190773866019	0.179472730784765	0.413681419157887	0.672504991448153	0.446865699242681	2.61531007556766	5.69214587721865	2.09403200299711	0.443807632346781	13.8464567801877	5.69216311065031	0.913278370297904	5.69216914133945	0.243163046966141	23.3096035852937	45.4713403655327	61.4888442309156	229.033221082819	0.0958194851487018	22.095457436895	88.9171018214058	22.9225773924823	30.387991305548	11.9900723674234
Female	Non-Hispanic White	260	15000200	2018HU0979225	W	N	77	12	7877	MF	30	2	50	16	927	927	77	16	5.06556693580085	4.27538962915973	-0.154487649304776	-0.0149624318572373	61.6147925096721	156.11680919447	2.68834379629065	3.3186439867964	0.22480436159036	0.827121283476464	1.0159705134811	0.755503488069015	5.68544539988919	7.30476035989981	2.68834379629068	0.260022328827308	14.2041189828328	2.68834379629064	1.87751280879022	7.30767609010744	0.294675696203062	21.9192384525699	50.4627211764804	75.847655137094	233.911979489007	0.119739787943017	33.1920280588146	107.337134478705	30.7538987433858	38.400601103124	15.7208954734333
Female	Non-Hispanic White	119	11800103	2015000190235	W	N	50	28	47502113	MFMM	30	3	18	17	604	604	50	17	5.09538907335115	4.31362576788715	0.217874012247226	0.0589476547538337	92.897782904281	173.18090263129	3.82357819832487	5.02327807179199	0.377945815997108	1.09734560699816	1.04252216890339	1.34775844308223	4.7561732987985	10.3908228193755	3.82357819832505	0.61535152824195	22.2500838888903	3.82357819832487	2.97716324752794	10.3935631361986	0.636971028055896	23.2960332143802	82.5801791512571	109.917821775023	252.836758379449	0.209857558306296	48.2226476000093	169.28910238741	46.7254215231709	62.4929048428832	24.1685279268699
Female	Non-Hispanic Black	154	12400400	2015000025127	B	N	15	17	155256	FMF	NA	1	24	18	184	184	15	18	5.08432599126885	4.16788898317213	-0.199275548178314	0.0390880289426311	52.9111152528487	167.907632257354	2.3614465884977	2.86561266672422	0.215951418451123	0.536019956983081	0.641279386758495	0.738494494472812	3.80088473933119	5.99595525775294	2.36144658849754	0.348750442438709	14.2552918446601	2.36144658849754	1.49113992545424	6.4190773503894	0.28437310289043	21.4062299399756	53.2049847336566	71.1523348787132	247.040434525926	0.103505449216836	29.1867747255069	88.9035428229531	27.431295866438	38.0707134775088	14.584319783305
Male	Non-Hispanic White	73	11201900	2016000222521	W	N	52	29	52	M	NA	3	12	19	625	625	52	19	5.16779573695297	4.49450745229965	0.251755863520875	0.0320604416151879	115.153188496267	181.246172916454	4.00893851944999	5.60106964573319	0.209712085835469	1.82829046855287	0.758666068852073	0.968507819613749	6.48059743221211	10.8722278389451	4.00893851944999	0.735668321874118	35.760896529432	4.00893851944999	2.77596921454102	10.8974247288302	0.53122777303725	27.7241093714916	55.6058575450733	123.871778075167	272.103667676666	0.537548235932881	44.0927938270632	213.022267401908	45.0676452054623	74.4576583989936	27.2711718658151
Male	Other	262	14803700	2015000430142	A	N	11	25	1193635	MFMF	30	2	48	20	140	140	11	20	5.00838162943199	3.77788186618739	0.0736701272047357	0.00450876869265661	47.0660527801883	150.338647303192	2.40538203817309	3.37086237208992	0.116662856526244	0.889074458081784	0.447394745322527	0.536969184385349	3.09812607318231	6.46005210178922	2.40538203817309	0.230266452586447	8.53413591885186	2.40538496216672	1.58089515282045	6.5385062848677	0.320619714248878	18.5669760681961	28.1643510432098	74.3686574035883	236.502502557752	0.272787469377314	22.5296912663637	103.628080340428	23.5571160545651	36.2107155692521	14.2219717908851
Male	Mexican American	153	13401105	2014001061165	W	M	76	25	547376	MFM	NA	3	34	21	914	914	76	21	5.09392819998906	4.36065410962568	0.219749067746068	0.0227933199373733	97.5537177308626	166.787662260615	3.50110528342728	4.12971357242036	0.189563583088162	1.4109492951641	0.907809521308771	0.750230906462336	7.07589697682198	9.50831055002195	3.50110528342728	0.375538820745878	30.6927977420112	3.50110528342728	2.27722372605399	9.516990871347	0.661616713129512	26.8636915583887	47.5945110633665	104.477377311845	255.655831274497	0.430784803307328	38.0881322748658	165.921854677662	36.9001629207056	59.2314023353969	22.3769495403534
Male	Non-Hispanic Black	259	14804636	2014000885644	B	N	18	15	524918	FFM	20	1	48	22	224	224	18	22	5.17505089187647	4.40415045619851	-0.0567143123488156	0.00349985325438531	77.2800737209378	177.425489821388	2.95127086346914	3.99173768106677	0.179944255834465	1.11257132537164	0.793847289763028	0.626630531113087	5.15697275945327	7.12930098485248	2.95127086346914	0.321486447035031	25.3259861894628	2.95127086836073	1.62086889780207	8.02238594751248	0.473759747632994	25.1853544781373	42.6588272265029	90.241321349342	267.790256679463	0.393158028587962	32.0526662884558	165.486378669308	30.7346754852935	47.8203559964877	19.7580395514755
Female	Other Hispanic	261	15310503	2017001205458	W	O	75	19	7563	FM	45	2	53	23	909	909	75	23	5.025809711609	4.1778176073736	-0.352471830359824	0.0078878932978635	45.8486510354179	153.499545315194	2.03530461254261	2.37807222443289	0.187774676570801	0.401064614486663	0.464323041190151	0.510171082847609	2.6565723276325	5.52829721237905	2.0337473951663	0.15438354399616	10.6819637258454	5.52829858795646	1.14300056793711	5.52829858795646	0.20113643239014	21.5439261259192	37.8264329680704	59.9870494907572	230.964660572961	0.0990498619119851	22.812214074765	87.5383070597884	21.4510796330344	29.5519455260542	11.7430944203932
Male	Non-Hispanic White	79	11100102	2018HU1072147	W	N	78	46	7875	MF	20	2	11	24	940	940	78	24	5.15487314989003	4.43934411090865	0.0345095413228879	0.0139318915121983	87.6940149294773	175.704752083215	3.23122374266919	4.21448518683158	0.186374805786486	0.83295342274346	0.849249117116161	1.23417746287397	4.85544678697872	8.77335724106175	3.23122374266919	0.370268765236996	28.6115271079173	3.23122374266919	2.15909428584845	8.7833767791489	0.580936790141381	26.1395675178583	44.1381596945274	97.514898515671	265.84003932502	0.419928264848713	34.9426118216486	162.291231171505	33.6904975248373	57.3621673151786	21.4747161704779
Female	Non-Hispanic White	59	10605303	2016000909176	W	N	3	23	361373	FMMF	15	2	06	25	47	47	3	25	4.62576567199366	2.80996509013044	-0.412398064154765	0.00973898146130533	10.9963898774884	103.079924511533	1.71101288662009	0.780909342027089	0.0413230163171647	0.0956477844246542	0.0622174056233048	0.10027285529673	0.321906811910826	1.71974898384023	0.637848412408977	0.0123613383517289	1.42687783009062	1.71974899768704	0.267875741897642	1.71974899768704	0.0519114452053145	17.3811915708802	8.71093490771962	12.7068739635078	171.334879436863	0.0223415238526684	5.84323696914413	18.4809572549162	5.44830579551766	7.02385576320233	2.70991940658531
Male	Non-Hispanic Black	191	13901700	2015000518199	B	N	46	33	465010	MFF	20	3	39	26	561	561	46	26	5.17989536868429	4.53038921493008	-0.04892025183927	0.025816039568585	88.3643813984807	182.310523857144	3.14978254404886	4.59450126448224	0.17287239413133	1.29477376979647	1.34447033594737	1.04607051205378	5.41722936716068	8.56198839879929	3.14978254404886	0.259138561829934	28.7456640439889	3.14978254404886	2.38838130663135	8.561996653084	0.296721070283286	27.0541212489207	38.2879589425372	98.2509197200363	273.301217329474	0.422305084818526	32.850675149729	159.001788379657	34.0676407323493	50.1952120473375	21.520985090292
Male	Mexican American	155	12600200	2014000615135	W	M	0	15	5024044854	MMMFFMFF	60	1	26	27	2	2	0	27	4.0823269818122	1.86971717850129	0.19192019411223	0.0150057220158743	7.85882710963475	60.1795566330767	1.41358078554102	0.228214434808898	0.0130591871073924	0.0699938215549782	0.0266875061444693	0.0591166740780766	0.0872473422201158	1.41358078554102	1.04553284335163	0.00423502719967107	0.275277460493732	1.41358078554102	0.183690557933794	1.41358078554102	0.0193692908722346	15.1123353851654	3.27606589586078	6.9161321211137	119.019877716107	0.0337536201580336	2.67210779921776	11.9677602678649	2.36117186675096	4.04879088000836	1.54733966945129
Male	Non-Hispanic Black	91	10800818	2018HU0677549	B	N	65	136	6265	FM	NA	0	08	28	787	787	65	28	5.15784917082563	4.45925413691637	0.258673904375253	0.0524738556454897	111.936085283566	183.153211974824	3.86310243741422	5.06747025656306	0.212210260349576	1.1858534732672	1.80705705001263	0.969263333239754	8.47217393492648	10.3013618692046	3.86310243741422	0.445534713350556	34.4148182938859	3.86310243741422	2.23104859626937	10.5010001654128	0.552117084430437	27.9756968905259	45.9936131686963	127.866827968272	274.248124580713	0.53947265256747	45.2887053681997	199.910418817469	45.2171211058535	69.969257705459	26.4862149631008
Male	Other Hispanic	187	13603001	2014000614745	O	O	86	41	8665	MF	NA	2	36	29	1036	1036	86	29	5.24023297220291	4.20719319334413	-0.126665117894033	0.0236946755885985	59.1767113687081	193.238977396974	2.20431456577284	2.84373152692679	0.130259966695758	0.729622751800549	1.11739548707769	0.544966800404638	5.64233080749788	5.99184772585976	2.20431456577284	0.289582883699779	18.8075951745964	2.20431456577284	1.85448307925106	5.99194771361217	0.284817107235398	25.8458559805219	33.2999406400392	79.0392787793898	285.49848618869	0.308097317920438	23.012919489449	115.067972470917	25.8164561961986	42.5054637189648	15.7332117902956
Male	Non-Hispanic White	201	14000300	2017000454639	W	N	32	22	22325151	MMFM	5	2	40	30	390	390	32	30	5.18271851479134	4.48196990573952	0.239450981542256	0.0416413889939016	112.327744394494	185.742239561921	3.76801597037151	5.7290166879295	0.235136803953975	1.2117730493054	1.1575919374871	0.761902947567322	8.71470214788938	10.2372389780689	3.76801597037151	0.757643205457051	34.7041613496709	3.76801597037151	2.9712281291177	10.2425293403305	0.639877400899733	28.8108461529208	49.9347522858177	128.293582371259	277.150566188976	0.554656035651131	44.7219778757583	187.308708519556	39.6011324237545	67.5835389905009	26.1076939899392
Female	Non-Hispanic White	260	15151154	2015000194684	W	N	45	21	45556162624738	FFMFFFF	50	2	51	31	542	542	45	31	5.09705898423043	4.29906776955237	-0.48076051175934	-0.0321306398028454	45.5270774523642	158.369093639039	1.89153247821794	2.67063722464368	0.177172360939592	0.41983741538556	0.303065722536625	0.553452100629255	2.38209723388517	5.14130125695744	1.89153247773414	0.291164088401052	12.5191974473519	4.80867679972773	1.15019955369177	5.14171836199275	0.246511008642452	23.0688848800605	37.8891979130596	50.7963505728374	236.438414195192	0.0942636676492258	22.6842822957541	75.9912167176395	22.4909983731515	31.0994238317828	11.1807734855754
Female	Mexican American	274	14802312	2017000282830	W	M	29	31	303129	FFMF	15	1	48	32	356	356	29	32	5.06424540414998	4.21604071937743	-0.23034756084378	-0.0418889872680427	53.8225841343375	151.768512647626	2.35500184661336	3.28426486255757	0.213726487971649	0.617766523378864	0.704282491536289	0.607735843737938	2.84594025424523	6.40154504821288	2.3549976534332	0.188002400045888	15.5112240739741	2.3549976534332	1.30401105116599	6.4015473188234	0.365196182885163	21.8546232544534	45.6658143204081	68.4732823371627	229.008431869481	0.110550626029518	26.9155820604844	88.5578723791005	25.0876447937389	34.8604355891088	13.4828579917261
Female	Non-Hispanic White	82	11201113	2015000459196	W	N	18	24	56182044142250	FFFMMMM	5	3	12	33	218	218	18	33	5.09842665799263	4.16019445562364	0.0497907046986254	0.0159872226403243	67.3555402681891	166.403220244868	2.85464603772938	3.90004796437464	0.286793230656423	0.721704426532053	0.859282004831165	1.01656117892932	3.94731716379109	7.75120785961191	2.85464603772938	0.230732543341906	18.4478288612227	2.85464603772938	1.6562528038352	7.75973237891522	0.32251307238159	22.5950585039133	56.149561729969	83.8814733762003	245.378501154183	0.142208819097159	36.5540174806805	116.949916052927	35.3591885218479	45.9762315421408	17.5117191515941
Female	Non-Hispanic Black	59	10603754	2016000248210	B	N	42	36	15402142	MFFF	25	1	06	34	507	507	42	34	5.11038164554845	4.44038809831746	0.226636754510223	0.0350663461778461	106.380772695374	171.64836449614	4.19372635624258	5.99251304167394	0.414394467026932	1.01092657711775	0.997674935177117	1.08318060365913	5.46237011476407	11.3985048771198	4.19372635624258	0.307351300531275	27.504520479408	4.19372635624258	2.48743771172414	11.3997301476959	0.579066052753573	24.3666461897354	98.4016130250985	130.414709173243	251.156814847879	0.19081260950117	52.0365236815802	183.704285259429	55.6768052202905	67.4086983257952	26.3320738494372
Female	Non-Hispanic White	189	14200801	2017000155709	W	N	64	20	6469	FM	NA	2	42	35	769	769	64	35	5.08832782432808	4.31198662777482	-0.00828771513213086	-0.00644139259797439	73.9729075991087	161.077631456316	3.26502205792086	4.11132889836815	0.279612043017016	0.89309245175225	0.966805307019101	0.786463919167131	4.05124208487509	8.85253929292288	3.26502205795704	0.556048462203059	18.0319243802642	3.26502205792086	1.6738017467225	8.8752501293834	0.483121426711568	21.6561739206791	69.765945787155	94.8490668462056	239.464776344227	0.159745777410947	41.3382711629189	139.174583495928	39.7224932896566	51.1254140223058	19.5464444214746
Female	Non-Hispanic Black	190	13603308	2018HU0876344	B	N	17	80	2354532217	MFMMF	40	2	36	36	209	209	17	36	5.08988746413271	4.20748595383319	-0.192562783121692	0.0100090501107631	55.4190374337124	164.004934246987	2.44354046551299	3.18440536328811	0.241801599089624	0.596458651004668	0.690297959021471	0.780477934870298	2.89803312855687	6.53622795740462	2.44354046551299	0.244636375790553	15.563045046056	2.44354046551299	1.55522801227939	6.64223164447862	0.347354854954535	21.6798116159201	51.4286665713163	68.5669842957994	242.72130600412	0.119778344963329	31.4010540766061	98.8611402279877	31.9050413559567	37.6213423620955	14.8274833265807
Male	Non-Hispanic White	49	10603731	2014000498853	W	N	64	16	64	M	28	1	06	37	770	770	64	37	5.1757889165943	4.46242058250166	0.200760197433066	0.0594890275121243	105.972622233387	187.781291794896	3.76880392238054	4.96210100148819	0.217031625879714	0.881128463299915	1.0927530690763	1.58547735729278	5.88113936040509	10.2212797804177	3.76880392238054	0.532836733050746	33.1018056518849	3.76880392238054	2.792381173833	10.2446711349068	0.61346957843683	27.1183697575993	54.6042387608857	134.901389499066	279.429339149127	0.53838702535126	41.7868602889521	199.369712546446	43.778277068256	72.511360037681	26.3278597353359
Female	Non-Hispanic White	261	15311502	2014000059539	W	N	55	22	5548	FM	35	3	53	38	666	666	55	38	5.09775491129393	4.35026416384011	-0.0609798597739363	0.0257840025693425	72.9142653778314	167.928604164312	3.23134497828203	4.02737955641884	0.302154256618644	0.720753471277719	1.09658011981194	0.999784713465448	3.59804966610814	8.77396715040873	3.23134497828209	0.349453190903872	17.9270542793826	3.24398148015285	1.8616458629181	8.7837063359464	0.461996531704409	21.5646799917343	68.2850806409558	91.0965329912247	247.063575946246	0.14771143676871	41.5493883907343	120.491945564045	43.4188789051931	48.7770598487955	19.9586911362576
Female	Non-Hispanic White	189	14100200	2018HU0280094	W	N	23	23	2123	MF	25	3	41	39	287	287	23	39	5.09840901824902	4.26835772417398	-0.0864673873642554	-0.0604768060291021	65.4895335543595	154.150933826227	2.7749490178732	3.54914175655207	0.253049413827006	0.444096380764101	0.761374311933456	0.808892418834186	3.83933299565105	7.54309344733698	2.7749490178732	0.482569161554784	18.2794342900052	2.7749490178732	1.93496591765385	7.54309349018498	0.409378408139553	22.6002654940855	52.6568842259988	68.886026822727	231.699360122476	0.13022461388552	32.8426464146072	110.495107048738	34.0437466463724	44.4426029818135	16.0738477953428
Female	Non-Hispanic White	225	14801502	2017000662955	W	N	38	27	421938	MMF	NA	2	48	40	467	467	38	40	5.10681063601768	4.32648258578874	0.0187592659913606	0.0298737245965077	77.1106845806247	170.15067373872	3.21038661501029	3.97562171265104	0.30885984055932	0.864757500913734	1.37494597166437	0.795919508436279	3.7474325398074	8.72575596023903	3.21038659054282	0.52222487398204	21.1799392868607	3.21038659054282	2.00115343388434	8.72673553139388	0.410701968628809	23.0191274184168	68.2485921548792	92.1111281718164	249.511443798187	0.170568217808061	37.1079235948099	137.539140944189	42.1712721482453	53.7203835591118	20.0257048339169
Female	Non-Hispanic White	189	14000702	2015000398602	W	N	56	58	5659	FM	NA	2	40	41	674	674	56	41	5.09931787458519	4.31201127290341	0.0439892671769535	0.069668574439936	77.9447732049888	175.736629155906	3.27040924224496	3.80064980477492	0.318523519424806	0.672985868759573	0.748536505699399	1.19825078868983	6.65496901713509	8.88947874917148	3.27040924227236	0.375712946829483	18.4724748419062	3.27040924224496	2.45581664261675	8.88989401481585	0.405012122466916	22.8333393259016	75.6245290200134	101.464173097443	255.630066685324	0.174610898865337	39.9835682296431	143.831406906896	42.5568978757912	54.3493690666803	20.9003733170845
Female	Mexican American	208	13602702	2017000207238	W	M	4	77	463410	FMFF	NA	1	36	42	50	50	4	42	4.63113193064647	2.83231426456812	0.238723706380744	0.093525387419601	21.5642741526257	112.69187428714	1.21344654668852	1.62742725976256	0.0878026690085616	0.34238501874629	0.124700034613758	0.2459582798961	0.834061054493562	3.29254896517902	1.21141072259175	0.0421853277111075	2.80909297676706	3.29295551716305	0.569915230147094	3.29295551716305	0.137442371402859	16.8003126893661	19.848694262869	25.6020500679659	183.182788603409	0.0438082919484463	11.5760682773339	38.6048204837664	11.4956831743173	14.6447561372348	5.5477394586681
Female	Non-Hispanic White	163	12200700	2016000189136	W	N	65	36	6583	FF	2	2	22	43	787	787	65	43	5.08672832276536	4.31829187683554	0.362341087944679	-0.00257320017636559	107.838308824994	161.443481649951	4.42926376123238	5.2932729163802	0.416259082106533	0.963478960810668	1.4513001527293	0.885973649283217	6.64315220443886	12.0374305523316	4.42926376123238	0.58616780409693	24.0845641509544	4.42926376123238	2.65575335873484	12.0399871956101	0.614631025084475	23.3467796541855	95.662816813955	123.953554044954	239.872576847657	0.212454252364308	56.3274658943439	189.718044156224	54.6930743449642	69.1200537952677	26.5614727986189
Female	Other	235	14202702	2018HU1257046	O	N	57	24	6157	MF	NA	0	42	44	693	693	57	44	5.04822996397589	4.04003633595728	0.162028183957436	0.0531726399872707	66.8241485139066	164.25212649256	2.83251107204293	3.51546720286796	0.280910520620239	0.528961185951568	0.743975820716918	0.896452565761015	5.28955206609662	7.6963740950817	2.83251107204293	0.348011874341031	15.9385226534217	4.09364560116133	1.99484029448624	7.69956326217744	0.404171549453567	22.5918401779475	62.042898362198	79.4784304315153	242.995630956991	0.125912149426884	32.1818963977538	117.182053707154	34.1397951684059	41.7857351360743	17.2071953785934
Male	Non-Hispanic White	192	14101200	2015000162320	W	N	40	25	7141164404019	MMFMMFM	NA	3	41	45	488	488	40	45	5.19474040276527	4.5814596682794	-0.0215685885908901	0.0023888386086516	95.5730694146333	180.752599264248	3.37870505989869	4.71940083000864	0.197227501752032	1.5073569917821	1.3164936420549	1.08465122342624	5.43248500348833	9.18403802464217	3.37870505989869	0.549889103451035	31.3303990028527	3.37870505989869	1.99153031089959	9.18427234186643	0.383584177414642	27.2868932683633	45.856255314304	112.362759408721	271.547729164919	0.463528128196973	36.616536082078	166.265364465067	35.2507388658263	58.8381236924052	22.9369921633378
Male	Non-Hispanic White	119	11800900	2015001474856	W	N	20	23	2756175620252422	FFFMMFMM	30	4	18	46	248	248	20	46	5.16913418678942	4.32483865889888	0.0366604750671213	0.0236206458980379	78.3745403329852	179.96364039628	2.78739654743679	3.95834675638419	0.148492157889014	0.897723453885414	0.990211835883724	0.894276843820873	6.93745929205376	7.57441424567788	2.78739654743679	0.500538526324056	25.2959616776052	2.78739654743679	1.77486170966442	7.57692937989298	0.40807487699447	27.1174705497344	37.4527621345871	97.0076410920933	270.65829343705	0.366922877288743	29.9869094682834	139.756652767875	31.9726707755967	50.2640474377122	18.8607998165392
Male	Non-Hispanic Black	191	13604103	2014000062846	B	N	23	78	23485016	MFMM	NA	6	36	47	278	278	23	47	5.1722459484116	4.3821384242822	-0.0541470861946003	0.00775021116062141	75.7918932778298	177.682128616671	2.8061755627112	4.13236860668232	0.14168631392034	0.531679434696906	1.0053481797996	0.900724976036801	4.11358522819224	7.57149054658639	2.8061755627112	0.455180167517487	26.0977427402548	2.8061755627112	1.53347406681207	7.62797603958293	0.459722864813626	26.0089634750447	38.7428291280555	83.5061739683609	268.080715016467	0.40405514353142	32.5259291556324	146.286215890112	30.4813349524126	49.2862077875407	18.8070387828339
Female	Non-Hispanic Black	192	14100600	2017001191029	B	N	45	26	14464511	MMFF	NA	2	41	48	545	545	45	48	5.08800678369683	4.44374012755764	-0.278254603073838	-0.0323380913080711	64.423954258368	156.909419405482	2.77896992687729	3.57163733234714	0.257639267045576	0.569235139449498	0.869767967307267	0.875089859721288	3.02255253145496	7.54842178966568	2.77896992694182	0.237458439991869	18.5743137656224	2.77896992687688	1.41203174798351	7.55402345383536	0.401388378009557	22.1826741395407	57.2715421818481	81.4855528220644	234.802099577676	0.130007772353423	33.2696798045279	104.608066840754	28.4296762902188	38.4254044625532	16.3126993373473
Male	Non-Hispanic White	257	15151085	2015000360552	W	N	14	12	91451	FMM	30	3	51	49	179	179	14	49	5.15014190278977	4.16693049931514	0.0401061601256361	-0.0278137630147461	67.1572348937869	167.725403601526	2.92343660954982	4.33089947029883	0.158899415568022	0.705740225130689	1.03323153345095	1.08544858960519	3.50425852375538	7.94295822026903	2.92343660954982	0.188782111733806	16.9459269399562	2.92343660954982	1.88111838923694	7.94672455200412	0.511994287600636	21.9720167950309	39.0271926242522	90.6999961434256	256.733118458053	0.375624254939861	30.435897581733	148.299633172973	33.4650812106413	48.3540553736531	18.7635749346041
Male	Other Hispanic	263	14805916	2016001002905	O	O	12	105	1216183434	MFFMF	NA	2	48	50	150	150	12	50	5.04091466114471	3.88088515268045	0.0315178902318655	0.0789443819851695	50.0190054853782	167.311784213444	2.46671792290458	3.43972328724377	0.12705470491414	0.469937770276885	0.677658113131347	0.565947922593038	3.24398809278204	6.70426605672465	2.46671792290458	0.335335872464765	9.94787896281136	2.46894645403946	1.61056430852719	6.70523450109739	0.523325136176108	19.2775538382112	31.615443269982	82.2798777017533	256.258134225919	0.302309848269976	25.6937749923084	123.48184163585	26.1922413512888	40.0931531896043	15.802913314629
Female	Mexican American	280	14803301	2015000983278	W	M	11	34	3315511	FFFF	NA	2	48	51	139	139	11	51	5.00590330319593	3.85498308241341	0.0132336199377528	0.00215623751644468	47.8569667231488	149.614134153384	2.35417226309414	3.17004658903378	0.192802006322507	0.685026824467607	0.459509554887366	0.54541233221729	2.16179555363455	6.16672843222212	2.35417226471391	0.169663432174612	8.18475211528092	5.99188807403715	1.03314824374339	6.3993036838311	0.339186538582972	19.3285747068673	45.0137253307063	59.7608474985042	226.565971211263	0.111074856968205	28.1912291116869	89.4409434515728	27.9538402968806	33.3035246297493	13.3343831296635
Male	Non-Hispanic Black	130	11700300	2017001034364	B	N	11	20	3281134	MFMF	NA	1	17	52	137	137	11	52	5.01281188917314	3.85705728031549	0.138303314899928	0.00770903256976793	54.3454337944046	151.490197781334	2.7326407098844	3.94007188105605	0.13346035771789	0.799057144972874	0.469413724719185	0.763084644102095	3.32609864026255	7.42647752506538	2.73264070981135	0.243880706730595	9.68518986940395	2.73264074447605	1.64129247359064	7.42808758518762	0.5789487630021	18.8875152519251	31.5559234965819	84.4341721413017	237.859861311044	0.306400032636386	27.9489411148865	123.21376810801	27.4977498660423	43.7732361641868	16.249638506216
Female	Non-Hispanic White	49	10600701	2016000515533	W	N	54	56	54	F	NA	0	06	53	656	656	54	53	5.09336960190804	4.35589823726257	0.107559143352411	-0.0562323846959473	86.7870468433407	154.028433303487	3.72634467288562	4.19184365811998	0.319607453402805	0.690248322030382	1.32153370929564	1.11751728028913	4.06345773841983	10.1292420016127	3.72634467330834	0.449791849596706	21.1630472863229	3.72634467294524	2.63415147527157	10.1292550108673	0.472245231119508	22.2901286547211	71.923265244591	110.627447833622	231.561251424003	0.176468435923574	43.4129591640796	159.555216142168	44.1847390137278	57.8699121693274	21.571925892264
Female	Non-Hispanic Black	202	13601500	2017000509771	B	N	40	21	401041	FFM	NA	1	36	54	486	486	40	54	5.09728876915468	4.44584119805606	0.276314355406083	-0.000512452199232925	112.410298110416	163.494004012013	4.19959375482357	5.34004567073222	0.372512922007686	1.33704508566704	1.41092863693546	1.28523725572827	8.72458410830029	11.4156733967711	4.19959375482357	0.983594009907409	27.9847617236585	4.19959375482357	2.52711110519946	11.4156793906463	0.62710324721719	25.7669457269061	87.3962284068374	119.332874480972	242.153966321876	0.203454544773145	49.3949843429367	170.796795017731	50.7487275942339	66.8391616362897	25.4237071167777
Male	Other	261	15310703	2015000091759	A	N	58	43	5358	FM	45	2	53	55	705	705	58	55	5.12655285247877	4.26514363478617	0.072794512887163	0.0109817093992584	76.5495426587218	170.295397570051	2.89476873498025	3.37784206720997	0.165006800868288	1.01243464034838	1.19740867759593	0.980516016651331	3.90541535069051	7.8533236478217	2.89476873498022	0.333009498691083	25.7313032931563	2.89476875605522	1.87621886017622	7.86879704837448	0.254310326163169	25.4440961150718	39.8356213936557	84.9041934824338	259.677872856689	0.355453826999648	29.6589669668492	149.733114332345	29.7346133697755	48.2818978075853	18.7926846877928
Female	Non-Hispanic White	222	14800100	2014000134157	W	N	17	34	17134014	FMFM	NA	3	48	56	208	208	17	56	5.09933266322021	4.14507586188724	-0.0424140250085935	-0.0237085552534939	60.5011175567536	160.07206306078	2.66278083091331	3.44975263926274	0.253306886705287	0.708685955276593	0.381759428384569	0.778471803730083	3.10435716222016	7.1989461827983	2.66278083091331	0.146686823648235	17.2229622619	2.72232152334923	1.41710046318625	7.23818874584057	0.318478032000638	21.7210279022484	52.2522313558433	79.2237746123957	238.342708968304	0.129915377151728	33.8735633801952	104.242952498649	32.0545452939872	38.8414371125579	15.8663599157187
Male	Non-Hispanic White	226	14203211	2015000683218	W	N	25	12	162557	FMF	NA	2	42	57	309	309	25	57	5.18738623130358	4.43979004400998	0.085926265827523	0.0836297916790328	92.3620619924546	194.613593913479	3.22039550554855	4.73328451996379	0.187502896432318	0.935701702320206	1.42351293105401	1.12228339455143	7.04803431159051	8.75386103455029	3.22039550554855	0.220556385988442	29.7961625953429	3.22039550554855	2.13315549778868	8.75394234725787	0.392690995206174	27.680347439723	42.9805549883454	113.868179650134	287.020318137802	0.452532447791787	40.2236545966928	171.284966518656	36.355964336369	59.410603693016	23.1079735633023
Male	Non-Hispanic White	84	11304006	2015000345031	W	N	42	23	4267811737	MFMMM	NA	2	13	58	504	504	42	58	5.185038925471	4.54074427434471	0.00869124297285371	0.0124284233716977	94.5790050332649	180.813723400743	3.35916463871305	4.68657430715717	0.198200828586733	0.759349354964281	1.04361857344004	0.782912427914385	7.17286259503993	9.13111377320308	3.35916463871305	0.48125055362455	30.4303767092658	3.35916463871305	1.88500003624583	9.13115619569031	0.507728007477386	27.1555134104709	47.2340860094866	106.226908275338	271.616597132862	0.47695327276698	35.1961869938661	178.518621134961	34.3805506314436	57.2351118798868	22.8101217094069
Female	Non-Hispanic White	224	14500301	2014000620732	W	N	53	80	5351	FM	10	3	45	59	638	638	53	59	5.09538345726891	4.29643883481695	0.110477867335827	-0.0191161348248574	82.0161928994901	160.175056849156	3.55845892813493	4.45932320530158	0.353402877680381	1.34325545048427	0.909018438741894	0.912610099136632	3.0159427402991	9.6728333396715	3.55845892835843	0.421385723648658	20.3920908658375	3.55845892813493	2.41262930261652	9.67289424166702	0.499961969524913	22.0482336752659	71.8364985797425	103.307607757672	238.457715817083	0.183083965121488	41.1939400074855	143.837950319852	41.9187754909406	51.3124457652826	21.213549695799
Male	Non-Hispanic White	286	14804502	2018HU1148990	W	N	40	24	8403966	FMFMF	15	2	48	60	486	486	40	60	5.1949049158574	4.57898249489642	-0.174236223055451	-0.047778092718599	81.8383755082947	171.936775191088	3.02663008897266	4.20179054942294	0.160176625781177	0.831781656966211	1.08192350446598	1.05520630266231	3.43230466272455	8.22044936229333	3.02663008897266	0.416879360971575	28.1205002955623	3.02663008897266	2.00788335606762	8.22723357231467	0.334084885107048	26.0394376261796	41.8560289094389	93.048819405883	261.552782503892	0.366839146894805	31.6496256198901	163.554931589871	30.7699453737087	52.7784347718151	19.7905880345201
Female	Mexican American	115	11701900	2017001263664	O	M	51	30	21555125	MMFM	NA	2	17	61	621	621	51	61	5.04505780840655	4.34265617581287	-0.0678663888928857	0.03519363597289	71.8650307522468	160.814486744167	3.13820347269834	3.91551256788216	0.298887838239561	0.743592388729203	0.975564878049456	0.758713917765724	4.4000122197906	8.52636294862168	3.13820347269834	0.356576020754523	17.7753061748557	3.13820347269834	1.97634005057832	8.53052147378877	0.455053196000861	21.9000545622539	68.4882447796178	80.4082411782527	239.171314897967	0.146470898704995	39.7123683314289	129.532701610767	37.1773554605727	44.731752141353	18.7642062745657
Female	Non-Hispanic White	43	10603730	2016001285603	W	N	25	56	2527	FM	25	2	06	62	304	304	25	62	5.10193404259408	4.28047531141354	0.345731074498502	0.0195246452463453	102.125902046727	167.579637802244	3.9747237789595	5.48395094129657	0.37526109754322	0.932805191290398	1.48051834070324	1.35335449542973	6.04920541851333	10.8043233611592	3.97472377895953	0.513480827548545	26.2482126956247	3.9747237789595	2.45872016222818	10.8044194077132	0.644409180136097	24.6938362829985	79.0479147495131	123.230468881292	246.678415422242	0.203075450609117	49.3863893852737	147.597299064055	47.85269776638	66.9220266174088	24.5119640883709
Female	Non-Hispanic White	79	11000101	2015000855318	W	N	25	7	2625	MF	5	1	10	63	306	306	25	63	5.1013990425793	4.28331462980524	0.259061936057776	0.0430274666607377	93.9137272723213	171.473118218751	3.73558671482286	5.3998734588476	0.355927768633105	1.22873809074422	1.36352130073752	1.1113612168531	4.36188037373525	10.1537582539572	3.73558671482286	0.631898241171375	24.900054213367	3.73558671482286	2.32553304005999	10.1543774802515	0.495781993586933	24.1402883781737	85.1318529054498	114.125976065037	250.964474318713	0.186597141691334	46.0219605744225	170.771503480533	42.857422722116	60.5044269493237	23.4374889039372
Male	Other	263	15151097	2015000831000	A	N	9	20	934637	MMFF	30	2	51	64	109	109	9	64	4.89071638356084	3.41973263482682	0.00870427967056094	0.0498034433986054	30.8284176168473	139.842924791489	1.59245094703487	2.41383980877218	0.0714871024323437	0.432870844402853	0.254752936138302	0.24328517418236	1.79776604651467	4.24608408858983	1.58481286980972	0.0790189224085175	4.70597208296393	4.30796802546358	0.788247359696498	4.30796802546358	0.1207739878521	18.4523930931387	17.3159656718934	37.358319532836	224.007797415909	0.178370666230241	15.3119502126811	63.8675469340718	14.3344479402937	23.4736917375899	8.8752610069622
Female	Non-Hispanic White	187	13603313	2018HU0848630	W	N	67	60	7367	MF	NA	4	36	65	804	804	67	65	5.08817959957602	4.30546244569913	0.105502760892829	0.0687957734871775	82.3489088671188	173.638468958937	3.50253507306961	4.30688607220352	0.37314942479639	0.888132894702861	1.16546022261291	1.26425914518999	5.66879547143894	9.48982763945328	3.50253507306961	0.574353210573891	18.9779352568462	3.50253507306961	2.08467054966588	9.52087744070024	0.468213994459758	22.5112303372164	71.9115866816717	102.878500459169	253.337613636499	0.159345796929437	46.3116562976791	151.822020125694	45.1908966361404	57.4567566287584	22.1830969272399
Female	Non-Hispanic White	192	14101301	2017000729404	W	N	14	30	42144414	FFMM	30	2	41	66	178	178	14	66	5.09425715808713	4.09820484385698	-0.0824086316985756	-0.0109456767510853	55.46744167672	161.307338704787	2.59519108966831	3.50903861662879	0.259337041712679	0.49641020441263	0.89388171174732	0.70841146546974	1.79407100154507	6.96871264894061	2.59519108966831	0.210212046795974	14.5893429446873	2.59519108966831	1.49356192886638	7.05446078041776	0.343652237734944	20.3731628077566	53.0367853281466	71.6208385846145	239.720850052877	0.130917101318712	32.2673567555152	106.541315904269	32.787155468881	41.6421540932598	15.5530353516235
Male	Other	223	14202801	2018HU0058926	P	N	65	24	6591	MF	NA	2	42	67	781	781	65	67	5.14000826312776	4.43095157763719	-0.192473808839902	-0.00171812250456916	69.3022774156995	170.424117775856	2.62507217619617	3.68557681791468	0.136286124656398	0.792946519087744	1.01363084813646	0.878811519769253	3.35646598703573	7.13568165848298	2.62507217619617	0.372592543999747	23.1756691234517	3.19219515255542	1.65480335311813	7.13568599295836	0.346311676967267	25.4001416967209	33.1848616731166	80.6555848008625	259.825069870841	0.319686855912184	26.8663056472281	124.471965637833	25.4272480125757	42.7642854177086	17.0514890399043
Female	Non-Hispanic Black	152	12600400	2018HU1325585	B	N	52	31	5255	FM	10	2	26	68	634	634	52	68	5.10086531120427	4.44892904355161	0.197336017376671	0.06679500066482	104.195095589082	175.503732742731	4.18823101339115	4.87780239916398	0.404999617857316	0.640786519920821	2.12144408186886	1.00278317081259	6.69424988537369	11.3847920770341	4.18823101339115	0.509833219306536	24.0517391246095	4.18823101339115	3.15481917836785	11.3847922245946	0.703652889503426	23.8780679136218	103.195402009558	134.71108031543	255.375942685279	0.223791682933632	57.8673722574971	192.912104997221	56.7342012184997	65.017618925881	26.7393360807122
Male	Non-Hispanic White	216	13903000	2014000222535	W	N	13	15	134746	MMF	NA	6	39	69	166	166	13	69	5.11004057989348	4.06944348078564	-0.077822897077817	0.0494535251261431	54.1425608566662	174.076368964434	2.31352359304242	3.73433995479371	0.13805037419141	0.418132106110178	1.01092203089906	0.700748647587499	3.74361122974215	5.348536628979	2.31352359244197	0.220086408208398	11.2908042160514	6.28880469002674	1.69490751756537	6.28880913554068	0.437012819879522	22.4026404716789	30.3427428564603	79.3053907431155	263.990091352635	0.297064494986017	26.2999966573961	107.332327482769	23.4244103120034	44.2573718244755	15.2686826128808
Female	Other	190	13603310	2017000695092	O	N	39	19	3939636713	FFMFF	35	4	36	70	472	472	39	70	5.06445253261649	4.21117788774113	-0.0515413098695234	-0.0110335100351318	64.0482418214552	156.556821784969	2.73351384170293	3.36354155664593	0.23906907042528	0.832821887749767	0.756179125737014	0.667217801777141	3.76920876110208	7.42968238419459	2.73351384172029	0.365392057307162	17.9814276919509	2.73351384170315	1.71731205187073	7.43046100373445	0.333265551013684	22.4307362356556	56.9418875884035	81.9583153447286	234.406263213901	0.137373207789484	33.9467265961338	105.392051043408	30.2696826974125	42.2129354013668	16.0188191269265
Female	Other Hispanic	192	14100902	2017001194491	O	O	26	13	02628	MFM	NA	2	41	71	320	320	26	71	5.07157607760102	4.20995941339792	0.29420887005936	0.0176768500847532	90.3931313127057	162.268590388431	3.63889283120292	5.20225955781128	0.356490414737007	1.0665419092657	0.83208955178751	1.23325685830365	5.21669849505544	9.89153155776437	3.63889283119824	0.244785244691229	24.1423522112534	3.63889283119824	1.73839186296746	9.89153625875544	0.561872941917497	23.8408336012854	70.864083464638	102.643599459263	240.791450050624	0.176288288852939	45.0284531610005	149.90771224787	47.6776542930763	53.1148643244384	21.9053570350761
Female	Mexican American	191	13702600	2018HU1068628	W	M	43	13	164348	FFM	NA	3	37	72	523	523	43	72	5.0499609306102	4.25058412738391	-0.169482104945099	-0.084263590652963	59.2106854127174	143.408519904021	2.59959565833554	3.06275769167212	0.211138694946609	0.674690390799766	0.709077352701829	0.598788715308904	3.18771202389794	7.06643316781702	2.59959565833554	0.345086284426492	17.1791888212415	2.59959565833554	1.15792691084906	7.06643363933797	0.318648572255369	21.7768827136096	51.4237373275904	67.4651158645795	219.480746975735	0.118049935476531	26.7213625045658	99.6987686531184	29.41175923828	41.6487038262056	14.264029923159
Male	Non-Hispanic White	156	13401202	2015000388117	W	N	9	13	71035943	FMFMM	NA	3	34	73	113	113	9	73	4.92165104454335	3.51159179373308	-0.104279299815859	0.0239029384181803	30.1840154317312	140.54869086844	1.51770921200114	2.12221803378804	0.0721265179017876	0.551114865622611	0.287730326545211	0.568456523257502	1.83144421809761	4.11088121292905	1.51261657129729	0.115180093007646	4.48514734968846	4.11171813915772	0.96657576297924	4.11171813915772	0.16063796410351	18.9546690446716	16.7893344630795	34.0100169670588	224.855163723013	0.157689324246172	12.6352675563626	58.2347201390434	14.0473955247821	25.6644870747753	8.50299116967664
Male	Other Hispanic	25	10100400	2016000781323	W	O	58	156	58	M	NA	1	01	74	707	707	58	74	5.12289357396685	4.41901837792551	-0.303670286955964	-0.103524117823253	61.2735393167153	151.315862419803	2.35810927825867	3.45663761707088	0.102670146112591	0.724257324697953	0.644474300216524	0.624618566737605	3.67757153366511	6.40990039352399	2.35810927825868	0.343437227758028	21.1391183584621	2.35810927825867	1.18169910074267	6.41000560022582	0.335696060466098	24.9841814294383	28.7221608735081	63.7199771101916	237.654534398065	0.303322464512839	22.9522542735699	100.616594361479	22.9125195070354	33.875470535271	14.0103840646081
Male	Non-Hispanic White	153	13400304	2015000112866	W	N	57	141	8257706057	FMMFM	90	5	34	75	684	684	57	75	5.18281998720344	4.50262131518041	0.422976285262313	-0.0565011530620096	137.771649445523	168.396081770495	4.6491253841389	6.58988453736917	0.234034765640958	1.16112632213195	1.55481190349648	0.87932278781493	6.68238057012099	12.5859356373609	4.6491253841389	0.723045492375987	41.895437630715	4.6491253841389	3.15248108713559	12.637633047386	0.974723512782139	28.6338855294266	63.6037839375041	141.766586304137	257.502677093183	0.640748189894958	45.0397275829809	227.674977022624	48.2240795624779	72.1176725255244	29.9290558139409
Male	Non-Hispanic Black	50	10606508	2014001324715	B	N	31	61	31	M	NA	3	06	76	377	377	31	76	5.18242378747562	4.5313944592128	-0.283659735104458	0.0119916442383276	69.9467839825617	180.262736112621	2.61262292716967	3.58747815934708	0.147275093917364	0.909777425906599	0.768443737011046	0.781984359301177	4.97604042435348	6.98499995953472	2.61262292716967	0.242746156765082	23.6747446291127	2.61262292716967	1.40752188700315	7.10184542754068	0.324440152902575	25.7726288608885	34.1578352666667	93.4074528548133	270.995594613146	0.346681388452179	28.8827378095432	132.614173179936	27.9664304398827	49.4398003495157	17.7002325912071
Female	Non-Hispanic Black	48	10608503	2014000563604	B	N	29	31	5034290	FMFF	20	2	06	77	353	353	29	77	5.09397334872241	4.43769777170295	-0.244586106619316	-0.0381555112235835	66.2285517370553	156.932823423364	2.67350511901422	3.51983690675006	0.246564379110961	0.705808586105188	0.381649200404892	0.782374017640729	2.88899163901252	7.26733668645212	2.67350511901422	0.206663351264506	17.7037403727767	7.23229919783578	1.33537973160878	7.26734038317729	0.348120439458398	23.7721806350887	49.5219440326751	76.6244780727595	234.828365735439	0.124527270338341	30.8947661452289	109.233349628681	31.066555721046	43.2029819128629	15.695370947086
Female	Mexican American	155	12603005	2016000622899	O	M	50	60	504715	FMF	NA	3	26	78	608	608	50	78	5.05301624169733	4.32835389860306	0.0142469880054801	0.0432791292214225	76.9073066235509	163.415391124554	3.24871076751489	4.09347955563088	0.308344777742357	1.1257600708121	0.801686467283306	0.952919416712917	5.70486202256772	8.81334946348414	3.24871076751489	0.380624819120888	18.6995357443273	3.24871076751489	2.0009232603386	8.83091137696216	0.457135607469551	22.6731774932311	63.3216672367039	94.5764696110488	242.066634830695	0.141976731527143	36.2947671167117	117.374295651616	39.0947109459854	48.5314269044159	19.6601120757644
Female	Non-Hispanic White	263	14805301	2014001282403	W	N	18	11	501614204618	MMFFFF	6	2	48	79	221	221	18	79	5.09684000499642	4.16292912755178	-0.231064056478827	-0.0380264915920713	51.002011395443	157.40364816835	2.10966201130148	2.89430518673668	0.201519455564503	0.260056482577066	0.576984756865049	0.621442602113716	2.59652087097669	5.72247406336727	2.10966197665953	0.25193596757611	13.5851904468907	5.71982777856478	1.14652015091123	5.73465581531969	0.304532657169323	23.1754423029391	43.7185288174063	61.2059425705651	235.356561134459	0.103337195948646	23.9858984232052	81.9077746155325	25.4268444232137	31.3526663018952	12.4130696995678
Male	Non-Hispanic White	213	13903200	2015001220199	W	N	53	34	845364	FMM	10	3	39	80	639	639	53	80	5.18356984070054	4.52000991476926	-0.248772308453891	-0.0646298959839961	71.6102060435	167.158078864032	2.71219492096158	4.05426051486575	0.142074039034696	0.94596944383626	0.85424039659269	0.708087978303036	3.50185841307159	7.37245153828449	2.71219492096158	0.426989029813356	23.9413111285026	2.97338906233179	1.75205422047261	7.37251016886873	0.300046001988619	25.4030455517967	35.986398736629	79.5933809047544	256.081550261247	0.343574188676646	27.1286864214901	129.863765175981	26.9327715646174	46.5965531797747	17.363576999263
Female	Non-Hispanic White	218	14500604	2014000236472	W	N	57	52	57	F	30	2	45	81	685	685	57	81	5.09376755336683	4.2802874932818	0.0595942664505252	-0.0543871955638115	76.6984699545057	154.374328535167	3.33657404394127	3.89976485128753	0.318359773627115	1.02337183051324	0.712590505077198	0.805672560030547	4.86613122094219	9.06037390644829	3.33657404394127	0.257732398325482	18.8298445786796	3.33657404394127	1.97333165559965	9.06974858980455	0.507476077575138	21.9871925347435	59.5574939359734	94.8898650773807	231.951147635815	0.165461791724621	37.69349672605	147.68512086948	40.6965224080791	53.1363177948147	19.3480544666013
Male	Non-Hispanic White	150	12900700	2016000211424	W	N	41	49	1241	MM	NA	1	29	82	496	496	41	82	5.19289736192278	4.57086783644126	-0.224150666959525	-0.0374936102305549	77.2245312979604	173.365789360965	2.82665515877877	3.76560746338114	0.16180764380636	1.02086731982114	0.962579098533796	0.754061573373935	4.85171354753993	7.68364467979631	2.82665515877877	0.348230934910162	26.2320533974386	2.82665515877877	1.6914725219606	7.68364535304072	0.502732499692895	26.3201105052109	40.3221127587847	89.9325873329463	263.181472751302	0.350609005142913	29.4685477273818	138.875653889256	31.0694958947608	47.8555910502577	18.5980816911866
Male	Non-Hispanic White	182	13900907	2014000878405	W	N	83	22	83	M	NA	2	39	83	1001	1001	83	83	5.09625268432676	4.20427385523354	-0.337249766066846	0.0283166931397418	47.7999258942491	168.101737667412	1.79418119244091	2.2240328381107	0.0945411478667187	0.4771937467034	0.691280170884237	0.600987791879873	3.73835593414066	4.87649178459244	1.79418119244075	0.297613533523842	15.7008497224576	3.39083493205179	1.03042028251143	4.87709013237466	0.386889081971763	25.6416380327918	21.106646689924	52.5573864474428	257.165031319929	0.233637472028177	20.9733006202924	90.8234939054867	19.4123493946729	31.484643730199	11.5350165636913
Male	Non-Hispanic White	261	15311101	2014001482665	W	N	77	16	7577	FM	35	4	53	84	925	925	77	84	5.1501799690243	4.4236039779593	0.0793344778739218	-0.0608239503723542	90.2820316734976	162.285319676497	3.31873501641721	4.39611971485628	0.189041856578833	0.920628713167631	0.717119003535696	1.11567417987757	5.91396427622229	9.0117985966199	3.31873501641721	0.303124068299679	28.8515892123004	3.31873501641721	1.9860039788786	9.02125708859727	0.498530345092769	26.2037481832349	38.3642162420159	94.885612329243	250.462198491208	0.409358135240822	31.6493753557802	169.548384543	35.0097571376594	54.9396126002283	20.7804417105402
Female	Other Hispanic	223	14203210	2018HU1043525	B	O	50	13	185058	MFM	72	6	42	85	610	610	50	85	5.06435950739834	4.31714359190941	-0.245307035681161	0.00401494998834593	58.6646045612569	158.915792877579	2.61451220294026	3.80612359392818	0.238690520637746	0.624628159048952	0.443770524319799	0.800782518273544	3.37290365887073	7.0926788559421	2.61451219948427	0.393684393152694	15.1014915933707	2.61451219948427	1.65226478506605	7.10698100060389	0.363727914345973	21.4380687811599	54.3581512758656	70.6966196138911	237.050299701927	0.126469651053696	29.9658943681547	103.076972446675	29.2935081312036	41.4069865403616	15.4942725115523
Male	Non-Hispanic White	180	13000300	2018HU0667614	W	N	42	27	451042	FMM	NA	2	30	86	509	509	42	86	5.17837430307713	4.52044619585274	-0.253458715789874	-0.0508283462681482	71.3064994796365	168.60285125938	2.67180537716394	3.52446871179649	0.127963561745932	0.780181552354942	0.550624874657434	0.771633224406055	4.28106752148787	7.26266854782678	2.67180537716394	0.355510321998134	24.2801295142614	2.67188599433155	1.99009919875202	7.26271955933159	0.477827594582251	25.6885081110686	39.5844830129176	86.9662062083896	257.739776711828	0.338321736347218	27.7060934896413	120.745885697725	24.9614730480027	43.7759481848988	17.2157630331924
Female	Non-Hispanic White	153	12801900	2016000206036	W	N	49	12	5149	MF	NA	2	28	87	593	593	49	87	5.09993764815739	4.32322580898614	-0.0282248205963402	0.010501686789933	73.3322869258728	165.74315564115	3.05980172503072	3.95658467158194	0.285484463077047	0.978753485171967	0.856746396858255	0.91322146276804	3.35564697645148	8.31296019806421	3.05980172503072	0.653351038116586	20.5306658650728	3.05980172503072	1.98544790516037	8.31740342783865	0.400848007885697	22.9663525665659	62.5698903995712	89.8890205969146	244.648139219002	0.156066719427297	37.0769024442206	123.748823500246	37.4179729030122	53.367823569743	18.7143699601965
Male	Non-Hispanic White	119	11800300	2016000263828	W	N	3	20	3313932	MMFFF	20	2	18	88	41	41	3	88	4.5930662211104	2.76528374130486	0.0444208673391626	0.00731252329498407	16.605012517108	99.5220019061869	2.5034826281277	1.29511431452735	0.0319843366686926	0.175639716844305	0.0797702552146775	0.14777403634268	0.308773553311765	2.50353802615202	0.921387891128354	0.0222134034524588	2.51642026740065	2.50353808819872	0.326735899263104	2.50353808819872	0.0463206849511677	18.0293257767313	7.82345872580874	19.5812075383352	173.568971252496	0.0775654355817246	6.78691756724122	28.8668222407594	6.33555540059363	11.2287462220833	3.99642639985592
Male	Non-Hispanic White	176	12601002	2016001298583	W	N	31	24	2731	FM	NA	2	26	89	380	380	31	89	5.17807070189083	4.44794652777564	-0.213011361756969	0.0146624058102519	69.0572013350743	179.959730731113	2.52418406786284	3.76757297197376	0.1367294317702	1.10054906157195	0.918957404397082	0.654957990392656	4.22309567568526	6.85170171283575	2.52418406786284	0.485617515568599	23.5601494238424	2.52418406786284	1.82651678347648	6.86144368335707	0.380458301835629	26.3582272443163	33.9419463558358	83.6348278851859	270.653883437175	0.312727225480338	27.9785470389491	120.9889898715	30.7939390285419	43.3729585884292	17.079505511933
Female	Non-Hispanic Black	190	13401700	2015000205818	B	N	4	18	22433	FFM	NA	0	34	90	57	57	4	90	4.6954469880298	2.96223897542318	0.4100570417427	0.0311317372524841	29.145368560335	112.908609419149	1.61091348467097	2.00175744684468	0.107078533489944	0.284861016912699	0.330532021716827	0.258313223656319	1.2830992906775	4.37891658756498	1.61091970754958	0.0527514323889185	3.65966267984464	4.37891660212226	0.821080638479377	4.37891660212226	0.170054581109648	17.0924490481484	23.7151478072346	37.5011896840112	183.446955446156	0.0588470236462798	15.4964116805162	52.753495241497	14.8810604186753	19.0021338878578	7.38792893365415
Male	Non-Hispanic White	227	14700400	2015001238174	W	N	36	24	32212367	FFFMF	NA	2	47	91	438	438	36	91	5.18312440516379	4.49332708248308	0.192062119624226	0.00440444848909638	108.3524350988	179.025607389868	3.731560650431	5.28747430004432	0.216372697622609	1.06083385953519	1.37530931364215	1.36682925529298	7.29746770538	10.1428381303565	3.731560650431	0.474367652638707	34.1104688633948	3.731560650431	2.35183081734112	10.1434328772171	0.595753914536843	28.0367610898366	55.408259340476	134.638589518063	269.599528772926	0.468950434864922	36.2926233356544	188.774236896784	38.763143219295	62.0265536224384	25.1506748235947
Male	Non-Hispanic White	156	13100600	2018HU1256212	W	N	36	26	636379	FMFM	NA	2	31	92	437	437	36	92	5.18235571226657	4.4905988623504	0.359159053185551	-0.0280245531486836	127.709469625019	173.179938191762	4.36400014736982	6.221369829476	0.233900989111892	1.30947356539063	1.14306969868407	1.04086317212106	6.46920144732373	11.8625726859496	4.36400014736982	0.593432203736721	39.7135687852432	4.36400014736982	2.86783117309307	11.8625820961195	0.741368608877156	28.2643137745972	56.9206038323796	148.373031198529	262.969843014864	0.560116677588486	46.9428648845512	217.235097295681	45.1928876412688	74.907455539978	28.6900108417671
Female	Other Hispanic	193	13601500	2018HU1017836	W	O	80	23	80	F	35	1	36	93	969	969	80	93	5.05244497249005	4.32935594543196	-0.145753315783668	-0.0582843885754302	65.6017668743994	147.549038349797	3.04721370857601	3.77981267005666	0.269173464847302	0.800953842554592	0.968079171884363	0.816409849673269	2.20934741891936	8.28316855295321	3.04721370864439	0.283846421767104	16.0323114249412	3.04721370857601	1.84187348572696	8.28318565145326	0.449327728905285	20.5284430789253	56.2811284033985	90.9678306846481	224.216465382568	0.138082254985442	36.5102151864599	109.678124010436	33.8909892965932	42.6217069480332	17.0808871750555
Female	Non-Hispanic Black	154	12501300	2015000762911	B	N	58	66	58231658	FFFM	NA	1	25	94	703	703	58	94	5.08779048650615	4.45487868817119	-0.817905940900596	-0.16150675591488	37.9766974744404	137.866211164936	1.6590791049018	2.01476276505111	0.141339271619389	0.445237647509963	0.494704751463668	0.40513521539756	2.6950198226975	4.47100164490121	1.64478958834569	0.180601093734538	9.21212730347701	4.47100164963521	0.907916716473234	4.47100164963522	0.18239393184506	22.0890898231701	32.0861467528229	42.2649366427263	213.087804517616	0.0676607178565687	17.0123821034873	66.3793834618281	16.8990230257144	21.4787973136182	8.76211505684356
Female	Non-Hispanic White	117	12001304	2018HU0444753	W	N	53	34	6053	MF	25	5	20	95	639	639	53	95	5.09587098534885	4.29997963674826	-0.0939677338017748	-0.00312532923765124	67.0884503309241	162.83634142956	2.97830525498325	4.04360910645318	0.282713336082773	0.844384611132704	1.04409452868621	0.79738350949836	3.21879309866744	8.09587074781007	2.97830525500141	0.274370530453255	17.0048094499674	2.97834757545432	1.68962805349289	8.09587305422503	0.392592408076234	21.5257133125197	61.163659764178	95.2566580243301	241.423041287351	0.144080815112055	32.7250667474696	120.922646344736	35.4783860015758	46.6829397868884	17.9757878135038
Female	Other	192	14200300	2016000914051	A	N	42	13	7344711742	MMFFF	NA	2	42	96	515	515	42	96	5.08372480845618	4.1503514073877	0.216492807776432	-0.0270035922751624	78.7945801884573	157.074657245761	3.15042789666248	4.18186245747585	0.292365299266362	0.690308214037411	0.995182404165154	1.05445105079259	6.59987270370365	8.56374919105478	3.15042789666248	0.350409897730896	21.0043885091323	3.15042789666248	1.77788252814073	8.56375090336077	0.451523196965212	24.0107549745643	64.5235830029655	93.7003068974485	234.987523851552	0.164198254712638	40.6711899777008	145.269421817062	38.8850139897023	45.5332533119996	18.5077812627393
Female	Non-Hispanic White	188	13701206	2018HU0012713	W	N	69	77	7169	MF	NA	3	37	97	836	836	69	97	5.08232640648131	4.29181692815126	-0.175602681820986	-0.0237267689264343	61.3266347123768	157.36998692918	2.76458606923797	3.49605271776156	0.266005450859903	0.627122196235689	0.859665768635857	0.761432166441498	3.98452964310171	7.5149193097168	2.76458606923797	0.280363559431363	15.0325535855457	2.76458629263593	1.50590618942849	7.51492407522056	0.456305829690944	21.1829355919748	55.157606797974	69.1337811860537	235.318811348873	0.130612762460554	31.1066458684407	114.133574451976	35.450604295553	45.804999642783	16.2639776921183
Female	Non-Hispanic White	118	11703008	2018HU0534739	W	N	14	82	143636	FMF	15	1	17	98	170	170	14	98	5.08398723169756	4.06273936332503	-0.522552280974737	-0.0740656077050818	34.4733679463123	149.892987674724	1.53671683225894	1.96763052307488	0.128432485591324	0.380878976575602	0.322506683133175	0.439844041803197	1.78251648256661	4.1769162384058	1.53666488297819	0.0460478660343192	8.79419800123099	4.17708822783077	0.788481422795531	4.17708822781957	0.191913187000227	21.4338878295675	28.9492085814219	40.0441469136493	226.882605789908	0.0725711737861383	17.8700808121692	59.4747818254863	16.6756512161606	21.8131219201161	8.71606332189842
Male	Non-Hispanic White	47	10607302	2017001307937	W	N	7	47	8313127	MFMFM	90	2	06	99	87	87	7	99	4.82277470901456	3.22424437640427	-0.2196387518709	0.019886174704697	20.17825671719	126.806320087106	1.10457420250526	1.63194357809292	0.0495522583841866	0.245485927449351	0.143890922359975	0.241090404000045	0.723274977620265	3.00225797088905	1.10446916760852	0.0499760113841845	3.11673436317253	3.00225846746202	0.523081574452691	3.00225846746202	0.0696318943362672	17.2552888614389	10.4279277983434	26.8561080095006	208.155761686419	0.110215154629371	9.45497998480803	45.1715312328079	9.60120440673764	16.2119350019714	5.74754051926548
Male	Mexican American	254	15151120	2014001370163	W	M	54	25	54	M	10	4	51	100	654	654	54	100	5.13467847101291	4.43959104754094	-0.20477526459698	-0.0213526077605019	69.0489575661407	166.222269105906	2.55831607230738	3.6039269536593	0.136753127399647	0.776924128508052	0.575741690779405	1.03767977526309	5.01682801158071	6.93253656941596	2.55831607230738	0.442127969976569	23.3069300884618	2.55831791377315	1.47550983318658	6.95422409080754	0.254003474282938	25.9900026480561	30.9063083921814	78.0222411454232	255.005570077583	0.330420233984287	26.0779273007732	122.05408456017	25.1318101735286	43.701810950499	16.3096212114347
Female	Non-Hispanic White	228	14702600	2017000385998	W	N	34	36	343785	FMFF	10	3	47	101	408	408	34	101	5.10656718363343	4.30119662302322	0.0536489852258137	0.0185882672657814	77.8548042693225	168.200286505457	3.31826405059042	4.62196535558854	0.321013679086358	0.756348179939695	0.808108231916283	1.06437788160314	2.12621134544663	9.01997064786524	3.31826405059041	0.450041689411308	21.7634987740019	3.31826416420598	2.07907374476272	9.01997685656339	0.409050053045727	22.4625102410009	69.8765654381901	103.79985798042	247.363298167119	0.165866665913259	42.1498305731123	137.674123218909	41.3130567057509	57.4286787678187	20.5204184935857
Female	Non-Hispanic White	111	12100600	2018HU0943490	W	N	63	25	63	F	3	2	21	102	766	766	63	102	5.08790277973475	4.31597147945286	-0.228999151781802	-0.110720900521504	59.5592924227816	145.06499439704	2.67677510386837	3.15255131190134	0.200143375387062	0.54472880627392	0.981184687980775	0.877404178405238	4.01985069663305	7.27622548719145	2.67677510391514	0.254795101275594	14.9508634895887	2.67677510386837	1.47106217979979	7.27622912369847	0.354092504544022	21.2503909038562	51.6372562313891	71.944726947051	221.379388562155	0.111948843202596	25.3046649493098	105.824837770441	26.3693456128469	41.4229318404806	14.8145708953195
Male	Non-Hispanic White	235	14400201	2014000858544	W	N	30	27	283028	MMF	15	1	44	103	366	366	30	103	5.17507057192202	4.43373234320091	-0.304990397756782	-0.0459840045540469	62.0997488994492	168.862802782921	2.32497098761193	3.2393538688449	0.128165682061409	0.782129127213265	0.843213771194805	0.757415826041796	4.23002760638793	6.31992024039755	2.32497098761193	0.389378643021391	21.3527174415669	2.32497098848082	1.28376525713677	6.31992638731994	0.367985713994627	25.7099027171756	28.3321885595253	68.2991305390245	258.037756296217	0.29307698094808	24.6153090447354	114.918426924458	25.9701588623314	33.357348909739	14.9982574274296
Female	Other	182	13603903	2014001140339	O	N	42	27	42	F	NA	2	36	104	507	507	42	104	5.077884186598	4.1001607786094	-0.0935541177898562	-0.00289791089374297	54.9600556693116	159.969996488778	2.40544580429806	2.95913901079899	0.237511495049586	0.736307172151401	0.411061474987839	0.647310845057514	1.61770960302419	6.53820343284351	2.40544580429806	0.44657619882495	15.7615821708442	3.74627893041223	1.54046446278256	6.53867961613933	0.349332383755653	21.8481787330684	50.9592774268869	67.2698481814134	238.228719233375	0.127292316977378	30.7023652903494	97.0554863705067	28.076968375268	37.2172902338627	14.3261568285806
Female	Non-Hispanic White	228	14701603	2017001164162	W	N	27	22	531127	FMMF	NA	2	47	105	325	325	27	105	5.11105039636779	4.30807143955347	0.477159297899003	-0.0350732154791742	119.728985858116	160.128590150305	4.58354839584894	5.78256086968862	0.460755092758944	1.23729554610561	1.39420566592589	1.60804555353551	6.21604493593594	12.4589406901446	4.58354839585278	0.825204062227423	30.3186170642298	4.58354839584894	2.32930784808354	12.4593762834513	0.511609412499346	25.1214621332563	90.1738760382279	141.241554892347	238.40583159302	0.22729735871174	53.5551065897729	193.353267296602	56.3625610305277	68.2346813563146	27.3186166739805
Female	Non-Hispanic White	84	11303002	2015001381303	W	N	56	5	56569	FMM	5	4	13	106	674	674	56	106	5.09931787458519	4.31201127290341	-0.246359061621897	-0.0773339707446924	58.3029219482518	151.711987426229	2.53284958112637	3.38575074724847	0.205901473768855	0.623556625993249	0.905052247469784	0.68465224545937	5.11739479495402	6.88494681098661	2.53284958112637	0.179181008747959	14.4012950708843	2.53284958112637	1.625222601441	6.8849989905957	0.332962028748541	22.0187068283479	52.0300639143679	67.9889290680041	228.94445933577	0.118179029044207	27.8574587352762	103.337175750347	29.0252800300884	37.6925760567238	14.4970469482452
Male	Non-Hispanic White	47	10606513	2018HU0980642	W	N	19	13	2351492318192	FMFMMMF	NA	1	06	107	233	233	19	107	5.18656720225795	4.33671414657951	-0.138375941716354	-0.00167145106352338	66.5756040485778	178.554834691295	2.42841915178344	3.69025790965345	0.14978276486201	0.719052425112838	0.825005976670527	0.739579677013667	5.74104605229722	6.54163854110717	2.42841915178344	0.220599573911012	21.7391808488687	2.42841915178344	1.75261745131243	6.60112760449336	0.543385436225154	26.4152030137319	30.2057127834568	78.382090079349	269.067641751661	0.329578030644246	24.6799395378963	124.895360171864	24.4821770946678	45.4394881722885	16.3352253588735
Female	Mexican American	274	14801902	2018HU1003931	W	M	62	39	13444163629	FMFMFM	NA	1	48	108	754	754	62	108	5.03791869597207	4.32354629259613	0.0639816707740965	-0.0253432729497893	80.4413191034026	150.291301829082	3.55247360791357	4.47887735502939	0.305341264263695	0.889243781001423	0.867404915237337	0.736862451935058	4.2019103035877	9.65626928327156	3.55247360791358	0.30118040853089	19.7419109781355	3.55247360791357	1.48078377847723	9.65662445107518	0.484029535475552	21.643748548676	64.8358796941399	102.230234495116	227.334631114164	0.143821248416368	37.5669229035155	147.061825822571	39.848928746511	50.0693496984043	20.1900069299459
Female	Mexican American	275	15151186	2018HU1140193	W	M	31	15	411810353431	FMMFFMF	NA	0	51	109	378	378	31	109	5.06232680186116	4.34872864823746	0.125141602072885	-0.00266216203019784	87.6954704937277	157.537675602006	3.50522095071354	4.80207118948633	0.301928473010122	0.624423364680729	1.09803993295483	1.02879008983446	5.932691193522	9.51716451378788	3.50522095071354	0.441325305050117	23.055858140478	3.50522095071354	2.4652568463826	9.52817841505854	0.431435205135058	24.0185285683278	66.8298452056284	91.7527864207649	235.506847738338	0.167953378705001	38.9821180350443	140.563484481453	40.7616527324403	55.9668630269282	20.6375884182231
Male	Non-Hispanic White	155	12801100	2016000097183	W	N	8	27	40392048	FMMMM	20	2	28	110	98	98	8	110	4.8706038813389	3.36630099767746	0.244105457441845	0.0288658706832298	36.9810809101457	134.218591676125	1.85782192029691	2.63814637727811	0.0857969494415836	0.517198433367637	0.312780870382515	0.533554230138227	2.3639582186085	5.03781778435574	1.85782192029698	0.127258916313014	5.4292688550698	5.05008356645598	0.873689278727028	5.05008356644433	0.158877744465629	18.9056112414329	20.8810244732665	48.7473486886936	217.216229112378	0.20378937768521	15.8738902740235	74.0363966101195	15.3913986307206	25.1537590760019	10.0887267972303
Male	Other Hispanic	46	10603300	2017001025357	W	O	53	20	53531615	FMMF	NA	1	06	111	637	637	53	111	5.14245142194224	4.44484465065143	0.115074057084855	0.00841210756948981	95.5757099484375	172.580454305637	3.41181607724874	4.84046421239661	0.194736725502835	0.940237839436264	1.10141866863911	0.768463635674971	6.77740777473789	9.23078810242482	3.41181607724874	0.181027233926686	30.2083208492304	3.41181607724874	2.35803559247551	9.27427764481688	0.727190401743105	27.0131483598345	47.3929123491056	109.294248808785	262.286820066448	0.449455151435909	34.6837873772118	166.074667568956	32.2177002430307	60.7540119097277	22.3718597388288
Female	Non-Hispanic Black	118	11703107	2014001191738	B	N	53	53	59255317	MFFF	20	3	17	112	636	636	53	112	5.10033488337266	4.44664137993256	-0.149737517517546	-0.0134127398805101	73.4719618796479	161.890817747104	3.17587201560557	3.96175672263091	0.309936058158116	0.780524213347229	0.685465182406338	1.05200454289378	4.69233289672907	8.6329151342687	3.17587201560557	0.391296180518191	18.0717149775066	3.3905031234776	1.90977417008132	8.63291518953099	0.46634270101734	22.1344215127757	65.4500308618648	83.6315989993851	240.370893063757	0.151446217232149	37.0001737843358	127.681407814158	38.4334231486865	48.3253878255693	19.0846798161826
Male	Non-Hispanic White	151	12500704	2015001270423	W	N	34	187	213427234926	MMMFFM	1	1	25	113	409	409	34	113	5.19588456639569	4.52378257611131	0.3099976703805	0.000480972733660328	125.685184726727	180.614610796237	4.09442311132916	5.92539727365066	0.231989056295399	1.58137663521396	1.12601701931089	1.49379533947414	10.1755225439266	11.1019871231209	4.09442311132916	0.850598411189965	38.081464392366	4.09442311132916	2.59100050744366	11.1297959361392	0.831956763730092	29.6966772385979	54.6197201082127	136.039598642387	271.39223749247	0.494926216016516	44.5853128859139	216.772358765842	47.2264097874493	69.7776592609113	27.7798662356125
Female	Non-Hispanic Black	84	11304000	2016001409123	B	N	43	45	43391242	FFFMM	10	4	13	114	519	519	43	114	5.10992965332578	4.43727817285482	-0.248512654138249	-0.00258187877292579	65.941337347514	165.231541915372	2.66064806370618	3.35568068620239	0.255752751028835	0.424013905347888	1.08743393049061	0.80245455636619	6.27804555247818	7.23237823319692	2.66064806370618	0.265152481048174	17.5561667369172	2.66064806370618	2.03840205446726	7.23239128349602	0.524878419652213	23.7839382618911	55.8941021165549	79.0671764707962	244.08153798024	0.130525257444033	31.6799192185496	105.333564613707	30.3924319756693	40.7095543919523	16.2353767853388
Male	Non-Hispanic Black	193	13602001	2015001352115	B	N	56	60	56	M	60	0	36	115	683	683	56	115	5.18422786701207	4.56437370844684	0.156696016837308	0.0456580016361254	112.288306084407	186.771485821527	3.95272914004721	5.53601849057568	0.231302673521673	1.5401169966847	1.6098743634203	1.18420087348633	5.32705535341053	10.7446295701877	3.95272914004721	0.555244473941353	35.161932072856	3.95272914004721	2.73040304290664	10.7446317942108	0.251252620336371	27.4077917069383	54.6002898628534	129.56754306951	278.301592959349	0.56886073245732	44.9785028071209	201.381580785412	41.7015580062328	76.0670967893426	27.5012704052995
Male	Non-Hispanic White	191	13901804	2014000589424	W	N	17	24	4535131710	MFMMF	NA	2	39	116	209	209	17	116	5.17598827290837	4.34720544310404	-0.0453224049728771	0.054459635651784	73.8387039670099	186.876488356018	2.84314199510481	3.94342666244432	0.154733225340531	1.04043815970549	1.12066844172457	0.954572950768732	4.33081415825905	7.05193732819295	2.8431419951048	0.437075835897138	23.5887416672159	2.84314199510848	1.81576920845515	7.72846107407031	0.432603029215053	24.9708111990685	38.6897841785799	101.423391582253	278.418930140282	0.403606753701177	29.7597639349663	149.390320155138	32.6511722629534	57.819623402567	19.7896138128497
Male	Non-Hispanic White	187	13603805	2015001319942	W	N	66	15	6670	MF	12	2	36	117	793	793	66	117	5.16408572286209	4.48134169618931	0.110433550295269	-0.0204889040888523	98.669437347326	171.330907610805	3.65016234779967	4.82840700704367	0.199591996008055	1.07895514577321	0.716502203165059	0.673408451518273	3.88743990476371	9.90434671009871	3.65016234779967	0.411351125211043	32.4692888501618	3.65016234779967	2.66105290086254	9.92216998075445	0.388778821828687	26.0315202299986	46.6992171893045	113.248296912095	260.861236494943	0.456773104640235	35.9482962301282	170.912725377277	39.0610582767054	58.8244820816631	23.8046465863576
Male	Non-Hispanic White	115	11600300	2014001357024	W	N	52	32	5252	FM	NA	2	16	118	625	625	52	118	5.16779573695297	4.49450745229965	-0.0113545339949416	0.0180524262750657	88.5133084172814	178.724973472766	3.27180725152579	4.40583106255125	0.191265259093842	0.795966879134048	0.898432691462128	0.952447000027701	4.19329496959788	8.89366566211	3.27180725152579	0.490301274259287	29.4871303021791	3.27180725152579	1.96042797771612	8.89369407463363	0.652493494611859	26.0533382967483	42.4898021119169	100.377032864553	269.259907857089	0.456696153441217	35.2308992433337	164.169121132468	34.9190439856732	55.5130549692566	22.0241629767997
Male	Other	45	10607507	2015000830992	A	N	46	71	6353685946	MMMMM	NA	2	06	119	553	553	46	119	5.13761383961974	4.29199202007502	0.145699508343506	-0.0231966606242818	84.5794668410086	166.403769103915	3.1123612392851	4.12439187766926	0.168672982718118	1.01484553654416	0.767525917688129	0.795534811219384	4.419440471982	8.46007093782687	3.1123612392851	0.418229193780756	28.9295655742157	3.1123612392851	1.80739607825886	8.46027500027882	0.39170635262442	26.1753374169498	39.0519909553232	96.0875616767908	255.214374212534	0.410311116612541	30.6233477120795	153.993085503316	29.8503089830593	55.1475054532018	19.8579831501873
Female	Non-Hispanic White	225	14702505	2015000595017	W	N	56	28	5660	FM	20	3	47	120	672	672	56	120	5.09904672385267	4.32179923310689	0.38653566976989	0.0547481364492022	110.867401137048	173.087086896199	4.40120098335853	5.55354822293225	0.423772460329284	1.45439436938156	1.08921917188667	1.23521194309725	7.96591475169174	11.9637045512922	4.40120098341885	0.7635981457805	25.0447196717383	4.40120098335853	2.19667713821344	11.9637046564573	0.67449552013438	24.1902609211101	92.1036609872924	132.424287172112	252.734026181982	0.224256836948448	53.12828713225	207.575634621328	60.083858142752	82.5549017171056	27.8083311140075
Male	Non-Hispanic White	48	10610702	2016000569658	W	N	17	20	1349124517	MFFMM	NA	2	06	121	205	205	17	121	5.17673361271326	4.33841299527734	-0.0602000431706322	0.00822147751173589	72.111458163891	178.565430276453	2.81252201940408	4.07753367067162	0.15886606258866	1.13278169058641	0.777549533125033	1.2103642511937	3.21484927715896	7.48171919729882	2.81252201940408	0.390247151815636	22.9616850574325	2.81252201940408	1.65538764678286	7.6452274939849	0.622851048583465	24.6394288351812	35.5110461324854	93.3052836296539	269.079616677892	0.392455056169699	29.9690157902115	143.934151097667	29.35518830323	53.081585349197	18.9198086719845
Female	Mexican American	256	14802301	2017000336717	O	M	54	32	1654	FF	NA	2	48	122	654	654	54	122	5.06189562221792	4.33613630537195	-0.0501574217426294	0.00722895918341155	72.6736509598962	159.035044151154	3.28893663485092	4.05049412437286	0.318067623793705	0.829263168324615	0.930561313120554	0.746154427755071	2.5742931000793	8.94025659918928	3.28893663485092	0.204169506174003	18.7104840476974	3.28893663485092	1.70635065631276	8.94025668239219	0.333658618853315	21.0963974160573	71.5489907343011	98.2402301080266	237.18370006533	0.156637268796974	39.0331974805626	151.015514415589	38.1497430501086	53.4685930494156	19.5020540083589
Male	Non-Hispanic White	181	13401402	2014000147921	W	N	38	27	38	M	NA	1	34	123	458	458	38	123	5.18353350609754	4.50954864531787	-0.225391092464143	-0.113590918835491	72.5414086678626	159.165188971685	2.69609340051724	3.56486006850838	0.151426298903151	0.732412034434663	1.13699982621759	0.822276474498067	4.23271557836899	7.32852426471483	2.69609340051724	0.34957304932253	25.1002156167763	2.69609340051724	1.52850605094783	7.32874169845432	0.288598685485564	25.9061185543296	31.2993235751961	79.1297004830076	246.841870539805	0.32327011072517	27.1428050092099	120.076918157355	27.3887746300115	43.262862047383	16.6377184533425
Female	Non-Hispanic White	224	14500605	2016000721220	W	N	59	34	665960	MFF	NA	2	45	124	717	717	59	124	5.09174310180237	4.32610965306246	-0.165374713335649	-0.0167829043284602	64.1186286151732	159.965824808757	2.80636498893023	3.66343157953803	0.239302917402405	0.73339958961654	0.791193871861149	0.845370994509801	4.94774017804332	7.62848672567704	2.80636498893023	0.221441021450379	15.6040825668311	2.94712728364089	1.56678472183653	7.62849095343272	0.425488343802005	21.8475728809654	56.2412778807135	81.167040602438	238.224059841381	0.129816164716909	31.9480290863493	118.218241278762	32.6313211530214	42.6952116909062	16.7135915264918
Female	Non-Hispanic White	117	12000604	2017000697515	W	N	52	69	5250	FM	20	3	20	125	632	632	52	125	5.09477672555076	4.28616941406028	-0.167951864119405	0.0196183647896628	61.4496137221408	166.400093509059	2.6167052193786	3.13573743448568	0.219496782018249	0.44895409027124	0.402848274517221	0.875653005548752	4.11555223958767	7.11273072966705	2.6167052193786	0.307104175846505	15.0301458507709	5.15608361759026	1.79602970755944	7.11294224826621	0.328830234962461	22.4835828151594	57.5419926153447	82.8098867155615	245.375043128187	0.134220712992869	34.4005777436788	104.537214383756	31.4048679541492	44.3187152911441	16.0518539014694
Male	Non-Hispanic White	56	10605910	2015000188837	W	N	23	24	27484523	FMFM	20	0	06	126	286	286	23	126	5.17726427327845	4.44175563738806	-0.151293559724321	-0.0418481349855157	73.0001924658743	169.93502163262	2.67698018692095	4.07353267581198	0.14831317311487	1.03542346676456	1.12696002070972	0.753933147103626	4.08875339167517	7.26840687150953	2.67698018692095	0.260872604430614	24.9433637829738	2.6769801893163	1.91756432778821	7.2767865970586	0.213618419844036	26.2696050656388	33.7778515908239	85.860417120353	259.26561964322	0.344810488115797	26.4837165183701	133.21341290619	30.5218260828872	46.0979927750168	17.3512231733671
Female	Non-Hispanic White	46	10601907	2014001496598	W	N	63	84	22627261963	MMMFFF	NA	2	06	127	764	764	63	127	5.08753573801674	4.32068431215022	0.488210138528379	0.0185424094118381	122.596006636876	165.021892584371	4.92973021290707	5.58381129314981	0.478695815761145	1.64457386382229	1.68347468450093	1.55182803269075	6.11233581952074	13.4003953255298	4.92973021290707	0.133703543720214	27.3196333619335	4.92973021290707	2.42223949060063	13.4003960569501	0.740832315788127	23.8687050491919	98.3471140411079	149.637199388876	243.849229196502	0.260263435896819	57.3924789560251	199.277454964226	59.0884252083422	76.4566757393885	30.0527728141025
Female	Non-Hispanic Black	199	13500100	2018HU0027291	B	N	60	30	6036	FM	NA	0	35	128	729	729	60	128	5.09529147524973	4.44833381685938	-0.322786543504991	-0.0312561368158259	61.9016771205112	158.227732216899	2.78736437235648	3.36816307900169	0.253448120574632	0.895591815555525	0.593918210334845	1.10381158758926	3.59394037587277	7.57388197057905	2.78736437192981	0.39545642373464	15.592381837523	2.78736437192981	1.31918812707657	7.57684192151097	0.376097282696749	21.2079602307803	55.6959145716598	74.1947504535155	236.280111522314	0.12588953757539	34.8560441672705	109.2751319009	31.9730125202545	46.4937431362905	16.4649691163225
Male	Other Hispanic	189	13903800	2016000906220	W	O	62	44	6260	MF	60	2	39	129	748	748	62	129	5.11928654820849	4.36769652569912	0.29259190421825	0.047897842820832	105.666555157559	175.420226731564	3.83607600634965	5.44215827591363	0.222132859446908	1.42636876915446	0.686529263056355	0.710621173075728	4.99888061482751	10.4270620991544	3.83607600634965	0.433405013449066	33.8314770051258	3.83607600634965	2.08674875480196	10.4275356764277	0.578119592790396	26.5454800641735	51.7224668165181	125.477803896657	265.517110303768	0.550357765677604	39.0170648524651	203.946869610362	41.8163066447941	58.3056758053603	25.4635954027894
Female	Non-Hispanic Black	199	13600901	2015000649814	B	N	56	39	6856	MF	NA	1	36	130	673	673	56	130	5.09314762999715	4.4332201050966	-0.41459522895777	0.0494326027995615	55.6245625473861	171.1568235135	2.49392528698099	3.25890998604407	0.235459804118516	0.633672840760371	0.559742727851496	0.652973060899731	3.78162137006821	6.7774658976225	2.49392528699183	0.53117021942783	14.0183806442303	2.49392528698099	1.56820484894947	6.77919178909966	0.33206356401187	21.3040212302115	49.261125434345	74.907656113208	250.617202461362	0.123060432552325	32.3215136394737	107.263994466353	29.2186753800882	38.3072649795269	15.6255144642706
Female	Non-Hispanic White	47	10605905	2014001177562	W	N	52	13	52192895	FFFFF	5	2	06	131	624	624	52	131	5.09805011405208	4.28585388776059	-0.0740799636927261	-0.0531009014671971	67.4761312389096	155.236414941905	2.98750884845802	3.60727718135913	0.268686787276403	0.707460824742701	1.00314494423571	0.791291322953914	3.29436562113412	8.12088982921044	2.98750884836958	0.235659574348655	17.3583710491367	2.98750884836958	2.18486619052657	8.12089100854944	0.358671172759565	21.5860858205439	59.0801749749101	81.9326182025815	232.921950264893	0.136151045650739	32.9630463096015	127.202507872172	34.6187454850413	40.4760787955324	17.3964096848966
Male	Non-Hispanic Black	175	12300100	2017001172718	B	N	63	72	6358	MF	NA	1	23	132	763	763	63	132	5.16630949476093	4.48415301248144	-0.106169118063311	0.0254403212262773	79.6772336494	179.782864788712	2.88566175186415	3.69140660850753	0.178686449119609	1.24013076306735	1.02970425476332	0.780308013927954	5.77563712893208	7.8439820824446	2.88566175186415	0.45590134598369	25.8298785084809	2.88566175186415	1.92007476602019	7.84404152639313	0.738522549391495	26.6114252122336	36.6948210671397	93.5052742259583	270.454358227341	0.360759837595167	32.5633091214596	148.83594908483	28.4465732943077	46.4170963059666	19.5109949290401
Female	Non-Hispanic White	41	10607101	2017000104550	W	N	8	76	351517813	FMFFF	NA	2	06	133	97	97	8	133	4.85566628254475	3.3439114329175	0.270180352529908	0.0246826764789294	37.117619850203	131.676605609209	2.02433540825493	2.88379044544109	0.155146776512849	0.481443449575024	0.420534433843153	0.516658214171271	1.00224506080736	5.50248660515367	2.02429611822191	0.11660389537579	4.95863530364897	4.58342760322801	1.13271620902109	5.502604331881	0.25696140003938	17.3360724248072	35.208862551466	54.1847519826203	205.871714544425	0.0807135569152364	18.4758120913213	72.5701715361942	20.8266073746428	25.6027927784174	10.4186270938133
Male	Non-Hispanic White	75	11301600	2017000153635	W	N	32	32	32	M	30	0	13	134	388	388	32	134	5.18111101517562	4.47586681166556	-0.28813702982278	-0.00304063764775945	65.8730748300219	177.340280831591	2.42222959448812	3.52763122589432	0.14070409284944	0.744680491457382	0.736442071212909	0.759857651139993	5.13923112831961	6.58429143011258	2.42222959448812	0.443272252389771	22.1605250415192	2.42413307968165	1.41586801718153	6.58430269105238	0.446140441085904	26.1952233512128	30.9802999167595	79.4857020205471	267.693795733996	0.312806976726876	25.6838612842944	136.613814821729	26.3710553618187	44.1362470125872	16.2103958571935
Male	Non-Hispanic White	83	11208601	2014001093830	W	N	6	63	1530864662341	MFMMMFMM	10	3	12	135	80	80	6	135	4.79505355608309	3.15500069645034	-0.0148041724272629	-0.0347399190321649	23.1084077697703	116.78254748954	1.24754545639909	1.77985707248744	0.0488267088680558	0.345424965169227	0.172683539432795	0.298489446393897	0.85016096769332	3.39117535643135	1.24754545905565	0.0471191002760088	3.52249401511958	3.39118013906586	0.613313301050236	3.39118013906586	0.149918125113143	17.5158883387745	12.473557573482	27.5974888723539	195.688912795199	0.118347909542203	9.98867734638894	51.4551909730873	9.18998175163145	15.6458196327504	6.10327034120173
Female	Non-Hispanic White	116	11801500	2015000011432	W	N	50	39	4550	MF	NA	5	18	136	610	610	50	136	5.09482907162305	4.29583349276617	0.206347567296156	0.0748843185822416	90.2136783330536	175.864425793196	3.70497028937643	4.96019883801349	0.354620029549884	0.813947313832478	0.936220774468451	1.24658763530378	5.82516878251654	10.0276508081607	3.70497028937643	0.439721011869126	21.585073626122	3.70497028937643	2.94002713193502	10.0711534125926	0.484194908975462	23.3493661991652	76.1178389040873	116.453681540368	255.769475701952	0.205859818547566	45.811702506066	174.388547006753	50.1693010051407	58.3934863846362	23.690457710128
Female	Non-Hispanic White	224	14700500	2015000953461	W	N	48	13	4847	FM	NA	1	47	137	577	577	48	137	5.10587243421857	4.30516065204582	0.0758366406654068	0.0563047272856336	79.9176950102447	174.544052825541	3.22950613508065	4.22305858054736	0.299814706653482	0.398170070915695	0.890794919905667	0.884229729832491	6.27744020061825	8.77825491177445	3.22950613508065	0.423548536559571	21.3113069292067	3.22950613508065	2.02821811407032	8.77870765430257	0.57567585769241	23.7461040999846	73.6322643435605	95.2842757127026	254.327900606905	0.166523951647787	38.4134673058042	145.374182757712	39.9474620192776	55.4051841117547	20.5338378833045
Male	Other	264	15311603	2018HU0463401	A	N	50	13	177452850	FFFMM	25	2	53	138	603	603	50	138	5.14790172826415	4.40136213952065	-0.221712796171249	-0.00956246341050102	65.3429362610844	170.432489935129	2.46541723571962	3.32161336777767	0.128412957099999	0.687259278139073	0.803424973474447	0.637186830380152	4.25118165614088	6.70169709820906	2.46541723561405	0.319316635437196	22.4450342211023	2.46541723561416	1.59854507794659	6.70169885057809	0.314309111902792	25.5038044340635	30.1751968504135	71.230608339291	259.834642827146	0.340053959803751	26.3197038986579	127.10436609662	27.0813454536841	41.8465921531354	16.0150201708917
Female	Non-Hispanic White	156	12900903	2015000500504	W	N	13	87	393336116113	MMFMFFMF	27	2	29	139	156	156	13	139	5.06642503607212	3.98761633533778	-0.200642574733512	0.00655012068924456	44.1226722625045	159.64860108906	2.03847382904424	2.94392356845508	0.1813624446423	0.625596445206556	0.57953860153931	0.54168695558607	2.17989279762674	5.53301664018607	2.03847382904367	0.213497658042893	10.109937514156	3.71580205128651	1.29837934458525	5.54114636727843	0.316153485375125	20.6449539985035	40.8458825619432	56.0080244315385	237.869660375233	0.0937577374091215	23.7205969420856	80.2959323595368	24.4092234879545	30.7504126489989	12.1222769349605
Female	Non-Hispanic White	23	10400123	2018HU0244877	W	N	22	9	32223	MFM	NA	2	04	140	264	264	22	140	5.10767048148627	4.21924559525756	-0.0571554808711153	0.0389118377670579	64.2055794593663	171.843180432608	2.73621237693537	3.66263918485845	0.25901626623001	0.567388957699276	0.847515866065506	0.762223455567425	3.62879553054914	7.43690190370266	2.73621237693537	0.364326633265373	17.8864271963539	2.73621237693543	1.73797776936385	7.43779638093704	0.41275605133597	22.4651301194969	58.1850443716236	82.074418857498	251.370576329824	0.130341132308148	33.7811487451753	123.463803004159	33.6957947587277	43.8689161621801	17.195082053776
Male	Other Hispanic	154	12102200	2015000749818	O	O	37	33	63237	MFM	NA	2	21	141	453	453	37	141	5.14629149855763	4.40115982461803	0.572568667416281	0.0958411082782558	144.564892824469	189.072890897873	4.5767621660553	6.72039093597983	0.273943998451634	1.82603099684765	1.4205585133865	1.59261759340866	11.5970475346628	12.2046523042646	4.5767621660553	0.498768622742413	42.0573702636614	4.5767621660553	3.64190953383184	12.4409294291528	0.88658522897079	30.5867173297032	67.378971893746	162.711241532149	280.869583530502	0.645671208255197	54.0825550832648	254.812307837784	49.2973270489284	78.6812425620524	32.1368320874528
Male	Non-Hispanic White	196	13402102	2015000652055	W	N	53	31	853	MM	20	1	34	142	640	640	53	142	5.18381018856948	4.51981155308947	0.189240415244416	0.0112741709615291	110.946928830595	180.383359210761	3.83404442418235	4.96379693021483	0.213874869270438	1.61753079520001	0.979059884407604	0.877726601976533	8.4517559311585	10.4217807261505	3.83404442418235	0.622833228522534	34.1021394289209	3.83404442418235	2.15305962704632	10.4220132877588	0.792533491673096	27.9373091586584	56.9743813595096	138.027685633917	271.131586092128	0.521099559892567	42.8690680602349	197.901051398028	44.3861010673031	73.317670261746	25.988263646906
Male	Non-Hispanic White	183	14101303	2018HU0742336	W	N	54	19	54	M	NA	2	41	143	649	649	54	143	5.17571902705489	4.50886656459139	-0.0937480421271076	0.0587415236822317	82.6916411424068	187.627863326351	2.95394635314281	4.28166004434947	0.179709138007348	1.33260081939024	1.39981971602934	1.23552173734117	5.8410660883169	8.01555829097961	2.95394635314281	0.365113208272294	26.4354376823858	2.95394635314281	2.02510704677598	8.02965869399008	0.254069689960976	26.9936164224608	38.7279942673429	111.027310474127	279.258088879796	0.430347820928084	33.2130032246444	131.721476921185	32.0483067491862	49.8627081781042	20.6228353308026
Male	Non-Hispanic White	153	12900600	2017000246621	W	N	19	29	20194646	MMMF	NA	3	29	144	234	234	19	144	5.18668362080819	4.33483488404173	0.304537444028102	0.0251259128769337	103.479376095298	183.425673003164	3.52287597970493	5.65177092513342	0.191370564228305	1.72187223178337	0.702047287452419	0.895191523185122	9.02494038730312	9.47638712589162	3.52287597970493	0.432725685578704	31.2900767895326	3.52287597970493	2.64256547760655	9.57616975946043	0.64913902259681	28.3735506703717	49.0459096433521	108.861720729113	274.554048945279	0.514132653283782	36.4369000835144	185.531880758621	41.2984750154578	66.5963117775878	24.1804966040013
Female	Non-Hispanic Black	115	11703102	2014001179894	B	N	21	89	2147	FF	NA	1	17	145	260	260	21	145	5.10424225458514	4.32609078176169	-0.128136352904715	-0.0252887114856744	66.5500588312811	160.605900807243	2.83024649067402	3.70907452674618	0.259293776828495	0.70591488052641	0.627657295983462	0.653619896492924	4.03544079046611	7.69340673375435	2.83024649066808	0.215086552716185	18.8194688715936	2.83024649066808	1.59028313571515	7.69340760564157	0.373824490472012	22.5138738094759	58.5992132213472	74.2827296197153	238.938612608763	0.144590980901403	32.0463124982565	117.50708458366	34.8771682613083	41.1994634114007	16.9063792455263
Female	Other	151	12300200	2016000291353	N	N	60	22	6063	FM	NA	2	23	146	728	728	60	146	5.07000793535092	4.07055048000581	-0.343399383128722	-0.0833519023472707	41.5605374011249	146.445893560017	1.87033927624376	2.42354759714104	0.153318428078727	0.373816405253824	0.250744390733135	0.636011829925226	1.32234579010934	5.07947730566392	1.86887102026768	0.208072459945319	10.3673836282019	5.08011813409441	1.04514385314392	5.08011813397753	0.281807783131686	21.2383123022789	33.8062229344907	50.8477739125827	222.958027299833	0.0830151787498764	21.2104604555796	70.1457606804725	20.2330729153869	24.96258598111	10.4169948988501
Male	Non-Hispanic White	152	12602905	2017000613473	W	N	57	71	57265824182320	MMFMMFM	NA	3	26	147	692	692	57	147	5.17748708297307	4.49207934128022	-0.0376602580157704	0.0356656836285827	86.0061739045417	183.672221954141	3.12461677513458	3.92620751225083	0.171162989072615	1.11049243571302	1.18882716895742	0.946965532769015	5.70773873073819	8.49358032273024	3.12461677513458	0.471455899833111	27.949769573397	3.12461677513458	1.98285500057922	8.49358900074661	0.434454951094205	26.5253511371286	45.4743147371702	98.3042628919472	274.830780842078	0.432294857916185	36.7906908687669	155.162759860228	33.6606011665938	55.5866040412068	21.4685217035624
Female	Other	261	15500800	2016001134796	A	N	39	30	3970	FF	60	6	55	148	473	473	39	148	5.06504094696317	4.20785061023534	0.353031602021611	0.0503158148203461	95.6678419547133	166.560192696183	3.78334536970165	4.92223449510825	0.352439776478746	1.24145836983344	1.27691604472588	1.29261771397225	5.46761136196895	10.2819644685452	3.78334536970165	0.524467580396559	25.3274274853695	3.78334536970165	2.13252658138872	10.2841989692441	0.419206745105622	24.2865738139729	76.1794312830896	110.739651260806	245.552084595276	0.179238110025967	47.6907431015092	159.532842537209	44.3766903714014	67.282904979719	23.2252085568531
Male	Non-Hispanic Black	55	10603749	2017000338722	B	N	74	54	747139	MFM	NA	1	06	149	889	889	74	149	5.16106792706943	4.41747392384332	0.342992546082101	0.0499407809166744	116.80039706593	183.278839812106	3.93210219781357	5.6275586482798	0.207368978074615	1.23131939917758	2.04307526038998	1.12097699700542	9.95790423585084	10.6864819897282	3.93210219781357	0.351334871715402	34.1386468369917	3.93210219781357	2.73119795496841	10.6885619277117	0.701819568385243	28.704313669893	50.3336998329156	124.215103204345	274.389196003538	0.561051696211106	45.8067711027299	205.191474265478	39.7995320275311	73.1196981123557	26.9731590165452
Male	Non-Hispanic White	225	14701500	2017000834696	W	N	38	113	2838	FM	NA	3	47	150	461	461	38	150	5.18184704850684	4.4980256723085	-0.152076186713027	-0.00866209755619793	77.1652700195334	176.4760107933	2.78627247470419	3.93330058413596	0.152775624362171	0.675781914399488	1.05885508526357	0.939510235884726	5.71664958658512	7.54034554405102	2.78627247470419	0.403593727516651	25.5642125019803	2.78627247470419	2.02935827591266	7.57387292375216	0.326761127521324	26.6948039791858	37.4470456593383	85.6530354301323	266.714741702388	0.377270502224056	28.4983969256775	150.246733880787	29.8474924909517	47.196988486984	18.57849858508
Female	Mexican American	188	13901200	2017001273021	W	M	71	23	7271	MF	10	2	39	151	862	862	71	151	5.01605258824416	4.29576493660707	-0.141225199547268	0.0844116447222875	63.7226286328022	164.09806935359	2.86492327031421	3.77662095327616	0.260093838613943	0.575217206459545	0.736944587207877	0.651043223747948	4.15533001374468	7.78730923551976	2.86487783574838	0.307512727491721	15.2779983889737	2.86487783574831	1.94208520612108	7.78754533248225	0.425166460534699	21.2427036286375	58.5116967424899	82.7815978097861	242.824676081894	0.130939983742934	32.8460082340856	118.625250072108	32.051626242288	41.8960397493828	17.3915758119945
Female	Non-Hispanic White	59	10607306	2014000690456	W	N	38	22	381272333592864	FMFMMFMM	20	0	06	152	458	458	38	152	5.10980773710282	4.33966018036482	-0.156927360685924	-0.00516927200958038	65.5447306125126	164.78448441785	2.78924243683905	3.82313293665737	0.249331815514394	0.768059823017404	0.955918060063843	0.845407047184007	3.27379251157741	7.58193131115462	2.78924243509689	0.302338724713165	18.545616648324	2.7892424350968	1.43610943797091	7.58194702648788	0.431628758711813	22.4991156694624	62.6339858985443	74.6167980583763	243.586072224665	0.135317799782905	35.0109640622176	102.762234029507	30.966132662048	44.5289733170873	16.9855152311897
Male	Non-Hispanic White	241	14203106	2017000248809	W	N	36	19	36	M	NA	2	42	153	440	440	36	153	5.18465514807083	4.50059964782778	-0.0203335352030162	0.00250375266846775	88.2581561604798	178.95938859448	3.11522507386757	4.55516080097972	0.159975793739313	1.22082307142978	1.47324409616435	0.513786105391112	6.13926418321861	8.46748628222777	3.11522507386757	0.69547812276713	28.8070980405311	3.11522507386757	1.82030817716	8.46805970842223	0.55420249388943	27.3312293871938	44.9330667683415	93.3779444693359	269.524734801369	0.408603560680296	35.3942700508394	162.018466065799	33.1782889074288	53.2731927051323	20.9907552970183
Female	Non-Hispanic Black	182	13604110	2014001345533	B	N	82	27	82	F	15	0	36	154	988	988	82	154	4.91937671739933	4.1863137934388	-0.580723309476344	-0.0470446414538994	36.8034092652954	130.625189827831	2.71804787005248	2.1230615730007	0.123643718048276	0.33191029537028	0.367140594747489	0.431688822036555	2.63038239269712	4.2890680147778	1.5778600427502	0.148638030301025	8.11186796997061	4.28906805666885	0.858474488460429	4.28906805666885	0.206309805696333	22.3248894348141	28.7664969807901	38.1186097906152	204.637591346986	0.0629065653285348	17.6441216315084	56.0617606498664	16.6835046757078	20.0659527461393	8.07223654158011
Male	Other	199	13500600	2017001020687	O	N	67	39	6767	FM	NA	1	35	155	807	807	67	155	5.13358338444962	4.3418344742513	0.418424022651119	0.0565080367442655	116.77610826006	179.484960911214	4.04801132819155	5.43569356220714	0.229675282947649	0.905193369784719	0.90849459653556	1.34231717764761	7.97256707312053	10.9097052902464	4.04801132819155	0.94705447632933	35.6065308249556	4.04801132819155	2.67221299838111	11.0036356348186	0.433565232673828	27.8477721015247	54.3698830762043	123.959106991188	270.118177266327	0.583349844718544	41.8232291547639	222.655836513485	44.9953080031436	74.2704723398423	27.3360360381137
Male	Mexican American	262	14803301	2015000606152	W	M	52	21	4852412	FMMM	NA	1	48	156	629	629	52	156	5.12356435045193	4.40816417809987	0.103959418385913	-0.00583084123790246	91.1151049233352	166.956535022427	3.35654258121915	4.22016432484587	0.194955416211101	1.16135901637069	1.10949923922742	0.902246875977935	4.44668301261634	9.12165633186669	3.35654258121915	0.499451689787395	29.7900567901998	3.35654258121915	2.22588541210901	9.12402870488872	0.518856499388607	26.145523323062	43.8981884906932	112.409499905958	255.849945652727	0.434459041710082	34.3452949970866	174.305527182441	34.0772514742401	50.879416066585	21.4692809246495
Male	Other	264	15311607	2016001007929	A	N	36	9	3611334	MMFF	30	3	53	157	432	432	36	157	5.15630673508761	4.34914070995321	0.153877846005156	0.00826050603972202	90.2892635651665	174.961725946716	3.28043143255045	4.44128166600113	0.192606213991998	1.02964545957151	1.05412013674694	0.589161997327288	5.46799093730732	8.90792685018668	3.28043143255045	0.497059255198878	29.8810337105219	3.28043143255045	1.68811190110557	8.91713683303539	0.580639177583026	26.5235942044883	44.763119432075	107.02544303565	264.99644790586	0.428292199344074	35.4444965399312	174.517029988622	32.5471786159483	51.8921236510376	21.732566930615
Male	Non-Hispanic White	79	10801002	2017000871981	W	N	75	15	6075	FM	NA	1	08	158	910	910	75	158	5.15876093328821	4.45237753525723	0.227161728254351	0.0147186968375539	107.720430403464	176.528022261562	3.80503120832463	4.85329255850651	0.201888549949374	1.29579201625262	1.48610163161248	1.12115597796269	6.58070426394824	10.2710648442778	3.80503120832463	0.611232224100982	33.2943470256399	3.80503120832463	2.48665206784712	10.3431471903071	0.690586045171637	27.3099991841837	50.9506214454749	129.81976754534	266.773694676788	0.50675041467122	40.5809346894993	186.888214027015	43.0951568434549	67.7895253101106	25.3770558451311
Male	Non-Hispanic Black	163	12400507	2018HU0033198	B	N	49	22	492559	MMF	60	1	24	159	594	594	49	159	5.15907366904805	4.46672752065028	-0.0952259095558378	0.0157249431961848	79.1624136536998	176.761013187989	2.8592770931146	3.8306805588918	0.164948349768428	1.1657479643054	0.948335896958364	0.805854518368467	5.97630363850678	7.76065495462387	2.8592770931146	0.384173284933932	26.0876225879134	2.8592770931146	1.73069106137342	7.77232088432835	0.459649609471968	26.6861636965267	35.920312839805	90.2100909903237	267.037727550463	0.382300065991044	30.0901262837962	156.609744911521	27.4276932804731	48.928466462698	19.0883714345604
Female	Other	264	15501300	2016000750455	A	N	44	55	1344121547	MFMFM	90	2	55	160	537	537	44	160	5.05658980220679	4.09175209594105	-0.250592961518888	-0.0263099924608315	46.5794349864417	152.975810830435	2.03964623582197	2.82370245911491	0.196503128285519	0.816102559198657	0.503834674494794	0.534915859546448	2.85331282316892	5.54433214868704	2.03964623584417	0.423775495653455	13.5195190817541	2.1240900869938	0.89101033461721	5.54433329904231	0.219802572344934	21.8370166200675	41.8656143285975	55.0595335133403	230.373376305482	0.0965580097192579	22.7178619020012	72.5211636705648	23.2901127672684	27.5236908752937	11.7470047447894
Male	Mexican American	226	14203104	2015000814682	W	M	22	19	401422	FFM	NA	2	42	161	275	275	22	161	5.15003425363064	4.36672065068332	0.155051033328932	0.00490232810815273	91.9984458537423	173.284816988626	3.3357537617131	4.68136660990411	0.19802084505279	1.3048471621298	1.11233558754101	0.808197251869186	4.28789823844305	9.06728554619731	3.3357537617131	0.304778037667313	30.4783378066067	3.3357537617131	2.31704949798293	9.06751883462733	0.604239782934519	26.5795074893345	43.7016433279649	110.400077855935	263.089276046793	0.474714731505639	35.2883415930761	165.603433994356	35.6513704861593	52.8596089139723	21.9400260559866
Male	Other Hispanic	56	10605904	2017000218422	O	O	63	18	511963	FMM	NA	2	06	162	765	765	63	162	5.11882289409454	4.36200938941446	0.00985306159194189	0.00230444151945643	79.1909837663816	167.524119114783	3.03009265392597	4.19303347143094	0.169763765819234	1.16214285577951	0.731482236088374	0.792303499056227	2.68788716715578	8.21777859722285	3.03009265392597	0.473083872235186	26.3257452604186	3.03009265392597	2.27713438491899	8.23664579971067	0.52567938696023	25.1348390333137	38.9235658056568	97.7340351808599	256.502007895433	0.36754819726557	30.3587823701813	137.326027468092	32.8767783137345	55.3636019445711	19.4306212460303
Male	Other Hispanic	47	10605700	2017000243720	W	O	7	98	272978535	MFMFMMF	NA	3	06	163	85	85	7	163	4.80593839038002	3.29540245705896	-0.00183504249972283	-0.00332626649548581	26.9387942889466	121.828232688143	1.47386647683376	2.15579892948809	0.0624043965520777	0.385856660265992	0.242787522140623	0.317577177717095	1.15484225288483	3.8347168746461	1.41071386073617	0.126426582259851	4.01087666803629	3.83471785270618	0.703109116821796	3.83471785270618	0.191832500534293	18.0946563074223	13.5020878540397	34.5919252068069	201.996442091053	0.136172769925083	11.9102407569155	50.1985503539265	11.5444425175854	17.9360543994746	7.12397951676703
Male	Non-Hispanic White	151	12503302	2018HU0409916	W	N	24	11	252424	MMM	NA	1	25	164	297	297	24	164	5.17559270534526	4.42962221800554	-0.250827429867337	-0.03534681801869	65.2871209664092	170.75775032641	2.40712739248225	3.56358313048553	0.133017666513047	0.762173164286996	0.85879555022886	0.784600172502622	4.70471250491179	6.54319091246145	2.40712739248224	0.360521547223455	22.2120377623727	2.40716967754819	1.56622403203077	6.54325048468535	0.240204572742732	26.1224203464693	26.4899448770575	76.3729680291192	260.206463536377	0.298494650667631	24.0809076559802	124.82804184208	24.9276101199449	41.4806679384432	15.6587526519836
Male	Other Hispanic	249	14702002	2018HU0099023	W	O	35	187	3527	MM	50	4	47	165	421	421	35	165	5.14089327548276	4.43953955765943	0.437842590841699	-0.00736720121875727	131.28652500386	169.614136902846	4.43542201370081	5.4887342736078	0.242462678381952	1.77900674309729	1.29714372250282	1.1130132113907	7.03926559323109	12.050352872677	4.43542201370081	0.714739165609837	40.5744828418905	4.43542201370081	2.83652910677786	12.0567270591842	0.983755954798981	28.5995566145278	58.2720751081175	136.610382409732	258.898358543623	0.493392108053686	48.8963996012535	218.175354233921	51.5671431679316	75.6972164083923	28.7080869698847
Female	Non-Hispanic White	215	13702300	2016001197954	W	N	28	19	287332	FMMM	30	2	37	166	346	346	28	166	5.10574034619101	4.29575393878065	0.130937358603827	0.0389867417690131	83.6541717254757	171.524667136004	3.44268900568528	4.45515400060664	0.341780975948072	0.944252426274859	1.16168849030093	1.10215619525729	4.2979976871107	9.35802483033106	3.44268900568529	0.610203004563878	22.1793675113072	3.44268900568528	2.12197163622712	9.35819896519002	0.416841007503675	23.2990788849439	78.2162126815191	106.167343331413	251.021056631603	0.182093774222682	42.529438700691	140.976247466044	41.144227779577	57.5288155828402	21.6046857965281
Female	Non-Hispanic Black	202	13603701	2014000100321	B	N	9	37	37839911	FFMFM	NA	2	36	167	112	112	9	167	4.93209087543707	3.62868013410382	-0.486890202941511	-0.0139454841387828	23.1452582227776	136.74876241758	1.23799492280742	1.65172474775203	0.100005435254731	0.230321902215527	0.213360801323501	0.342926169647248	1.22032283308306	3.36474475358583	1.23798884964526	0.0715662413508554	3.28073230003053	3.36520259382562	0.690784923597005	3.36520259382562	0.178954925680301	17.6888118703102	20.9283481226836	31.6448160865881	211.791130194912	0.0534859041128456	13.1167352729707	42.3833955243327	14.3621644083907	16.2628029928701	6.55487644087669
Female	Non-Hispanic White	57	10608510	2017000003507	W	N	24	18	55532458	MMFF	15	2	06	168	292	292	24	168	5.10101369429074	4.27107694079019	-0.324694895781383	-0.041184299562092	51.7478065121657	157.563632843865	2.21875844490358	3.07050108819464	0.222266144224288	0.590268524466065	0.396115312289848	0.753092423179477	3.81931826214531	6.03121025750526	2.21875841346094	0.259490060687431	14.6774274788715	2.21878024120875	1.26969573254332	6.03121067704607	0.355808627357934	22.3228666078368	47.3743359339269	64.008266231205	235.535950216295	0.100465910359586	28.5077084711796	88.5129608349912	28.4997916211691	34.9352885775146	13.064934280373
Male	Mexican American	264	15311401	2016000285563	W	M	37	11	30371	FMF	45	1	53	169	455	455	37	169	5.13562459396221	4.47614170124986	-0.332271963533316	0.00157862994386978	63.0463227352581	170.238981585283	2.38619338383385	3.40955300986178	0.126359419979384	0.571515406655454	0.664005524603346	0.757729990928796	3.54433749810012	6.48576627202802	2.38619338382034	0.254316814728104	22.1877096330783	2.38619338382044	1.48836941157899	6.48634611442708	0.454826349295165	25.4212964308532	31.3722752455235	77.5838757297997	259.613350019282	0.305915158548599	26.1272100702746	114.031855884389	26.7308710693328	41.8715637867409	15.4871914541861
Female	Non-Hispanic White	188	13704600	2018HU0747391	W	N	51	17	5158	FM	40	2	37	170	614	614	51	170	5.09700225916628	4.28763361727904	0.037732192857137	0.0439349023759078	75.5931605468699	170.875831564882	3.18470791007213	4.14450307147419	0.318750993580788	0.846399038852964	0.75208154062933	1.04758776825545	5.80158081484156	8.65693340386755	3.18470791007213	0.547933598214033	18.4434584299224	3.18470791007213	1.79353917044366	8.65693363659077	0.529747031883118	22.73629314883	71.9208574394785	93.1623695730651	250.308556232385	0.163290613289996	42.5630198368221	127.771823685315	39.5037860635084	55.6405770981976	19.9289909748003
Female	Mexican American	251	14700800	2014000671209	W	M	26	38	4050267	MFFFF	15	2	47	171	320	320	26	171	5.06205867075683	4.29956470916161	0.0752476103250119	0.0110408391747112	79.4249316413978	159.668455133151	3.30956401246803	4.67001517984325	0.290542464152939	0.654571346404247	1.01243425271143	0.889403533545282	4.11772258270601	8.99632614722033	3.30956401246804	0.242034429974319	21.7458096687726	3.30956401246803	1.77489235430033	8.9963277152137	0.442086830385403	22.9986086814403	70.6491586513555	90.7707637190531	237.891846294568	0.158987623333119	40.0788778044873	145.061685933993	37.989658096192	47.2442090540363	19.682957333902
Female	Non-Hispanic White	255	15400300	2017001276866	W	N	66	47	66	F	15	2	54	172	794	794	66	172	5.08841189768206	4.32273702781143	-0.12351569467173	0.0255006706287011	66.63442481636	166.319821166346	2.98638989919917	3.82166423264774	0.269265322750646	0.823913376886543	0.644761546200815	0.783231241457611	3.57289719458091	8.1178488040328	2.98638989934649	0.415836085070331	16.2733493052463	2.98638989919917	2.09917559248366	8.11784938043588	0.396243596728153	21.3127009752573	63.1994215660122	87.0038423779377	245.286260046199	0.154205971237427	36.0975547634849	126.522290956316	38.9144691485315	46.9992488359762	18.3130102353577
Male	Other	262	14803601	2018HU1087970	A	N	33	11	123341539	FMMFF	NA	3	48	173	401	401	33	173	5.14974399346458	4.4257654618032	0.127775826604739	-0.00912877521626108	94.9681230460061	170.820828091301	3.31184964369343	4.98422146937533	0.176023183521167	1.13980901519293	0.988261163279973	1.02430184315222	6.81450660505245	8.98252417709947	3.31184964369343	0.464375369095955	30.5221012993245	3.31184964369343	2.36197722958614	9.00254070496224	0.477635621398891	27.6752519779539	43.4053828738923	99.4577704302547	260.278550239626	0.450619941060492	34.0323617315578	174.198489582876	32.3910560043242	49.0168080323028	21.5500855968037
Female	Non-Hispanic White	20	10400109	2015001182948	W	N	59	137	6159	MF	NA	2	04	174	709	709	59	174	5.08793011329465	4.31719492427149	-0.124842325503473	-0.0605562240135552	66.1782989493118	152.531920558391	2.92228738068766	3.84341239676436	0.268352855837404	0.693817662250013	0.721173158144906	0.758496507351228	4.07219494567057	7.93997794846275	2.92228738080469	0.345288995083655	16.3271326599057	2.92228737929808	2.06909051935471	7.94360067719441	0.41718673646307	21.6460612389215	58.8718131236759	91.7028518077525	229.871838008831	0.126866363900773	31.8766502248829	116.225241388594	36.1557053448654	43.3783055253504	16.7937892767315
Male	Non-Hispanic White	152	12602102	2016001410759	W	N	61	29	6461	FM	NA	1	26	175	735	735	61	175	5.16724345882847	4.52661829197843	0.0355065122461064	0.0347376715263308	95.7867919345216	181.631721786719	3.50083996236295	5.00600951544836	0.206098769321189	1.30965844266138	1.73383027733888	1.16873740593858	3.70494982692849	9.51570335670581	3.50083996236295	0.449710745029934	30.546550583073	3.50083996236295	2.16637593789083	9.51626937914261	0.698829079257566	26.3610884714275	48.921990030796	109.415648309464	272.537668802691	0.523151228809113	41.1734906255198	184.032822902707	41.7932137058828	58.2044103159032	23.8527690548425
Male	Non-Hispanic Black	48	10608505	2018HU0521709	B	N	44	29	1220444416	MMMFF	30	3	06	176	528	528	44	176	5.17413146352632	4.5084357042536	0.0787928023418799	-0.0169428460308321	98.2218314256607	173.675500343901	3.52076606827608	4.96079610763299	0.20560243765207	1.21893785845958	0.974665364419777	0.901262523385355	5.38518074942052	9.56136395543307	3.52076606827608	0.639648149865168	31.9477054970722	3.52076606827608	2.21400990285921	9.5704344006511	0.305803917077483	26.8978578868645	46.5938799080964	112.943490856097	263.534016372876	0.544890433563834	39.445329493884	172.174898373687	32.7596217206564	58.6324907299709	23.1960405670534
Female	Non-Hispanic White	77	11209911	2016001400495	W	N	9	52	9332610	FMFMF	10	4	12	177	110	110	9	177	4.91735184435005	3.5197833722107	0.336012159880055	0.0275959962568215	47.2662037704354	140.463524168193	2.33616663508302	3.31915139515439	0.192431412585613	0.490523482592955	0.354263614916281	0.656491959008037	3.27832340097419	6.23522219026774	2.3361666357076	0.167407207630845	6.05322034944855	6.34971830491516	1.30282793112916	6.35035931239845	0.317942077410528	19.2323768607181	41.7383402137679	64.9978665527859	216.09159982639	0.091640995465945	26.3657294252926	80.6190021973994	24.1151496756697	32.0213779187719	12.6206496409031
Female	Mexican American	150	12901901	2017000267232	O	M	20	22	2201	MFM	5	3	29	178	244	244	20	178	5.07233409710702	4.18731847866646	0.015204959096375	0.0326146952001263	66.8548223461912	164.835629463234	2.84298741887121	3.67556872286876	0.268192281480794	0.909602783162179	0.741578642527709	0.640701696625957	3.97426251650071	7.7280410104948	2.84298741887121	0.398939368565994	18.5739225338477	2.84298741887142	1.55917308566856	7.72804103925354	0.351680305118186	22.5156940556337	59.6087842872957	77.625393902892	243.642772363112	0.123575132515835	33.6113081935452	129.278368028504	33.2400810784098	47.0891468542463	17.3168334131808
Female	Non-Hispanic White	153	13100802	2016000654586	W	N	65	12	6565	FM	45	3	31	179	781	781	65	179	5.08643304617223	4.31330464916106	0.410721947671038	-0.0262893150689187	112.620819539355	157.61316861003	4.6455861728337	5.40772086273981	0.428291222166088	1.32415232527421	1.10753922986172	1.54105102267376	4.87832575258036	12.61235875002	4.64558617283948	0.781698004392819	25.6821178642093	4.64558617283368	2.50234723190739	12.6280124761544	0.554943170849234	23.242542350831	98.5301838427005	142.904495506882	235.591484899772	0.208887526532438	55.6540836365905	191.45602927757	56.4276672156011	74.3209121251373	27.3615136171934
Male	Non-Hispanic White	228	14702300	2015000927095	W	N	15	39	15124344	MMFM	NA	2	47	180	188	188	15	180	5.16489036411155	4.23739561925631	0.245494193266006	0.050429610088837	88.4900231174014	184.070709435817	3.64899329857325	5.0188961660403	0.215972011723691	0.996551458501925	1.34381533303853	1.29916339058854	3.80966967989514	7.75354944581925	3.64899329857325	0.651349427358393	25.060230706496	3.64899329857325	2.12070968461077	9.91899217568019	0.528873880094085	23.2505304550712	49.1928442348593	120.338560555909	275.277855600033	0.527387280871648	38.8265096796392	171.675726115885	41.6403577216361	68.5438347585714	25.1121762582534
Female	Other	73	10800813	2016000746402	O	N	40	20	40	F	NA	0	08	181	482	482	40	181	5.07269991268322	4.1317708725465	-0.0431643621234788	-0.0286776144674084	59.6567027626487	155.092590744946	2.39806157778005	2.8676235083003	0.214814522404819	0.622018427734152	0.730183211042616	0.557975098536957	3.50945836019781	6.51708475898935	2.39806157778005	0.341995445779395	16.1254200580619	6.33776916791605	1.09259036946184	6.51860721038394	0.303136893074437	23.8770520804561	47.7960228897505	69.8101409419202	232.760082508562	0.114146757105332	30.8065246763008	96.9339335517332	28.0297056034646	34.8111394459739	13.9543252676174
Female	Non-Hispanic White	187	13401501	2014000857202	W	N	70	17	7170	MF	NA	1	34	182	841	841	70	182	5.08370141678906	4.31789803221736	-0.088948351322172	0.0449985280518859	68.6450950421998	168.797529238313	3.0751810954587	3.96434203436864	0.282020943409046	0.884347346570658	0.707201598220274	0.752677573375728	3.56532316669459	8.35914013930519	3.0751810954587	0.451599007719845	16.5205918327656	3.0751810954587	2.1531316752129	8.35920889100613	0.423269818938658	21.3222935207205	60.7625132904985	96.6329510257143	248.021756275959	0.145893065540396	38.6576277818723	134.967139207251	38.1279775163759	48.0308741126452	19.0677954040574
Female	Non-Hispanic White	84	11304000	2016000372722	W	N	15	33	37171545159561331	FFFMMFMMFMF	15	4	13	183	186	186	15	183	5.09769814258581	4.12011251299862	-0.179027957525098	-0.0140225157894162	51.4743978777808	161.366088736028	2.35118483972972	3.30280930861643	0.21386363301731	0.586949441305706	0.602016481949672	0.706765658116925	2.1195753720788	6.3904393934712	2.35118483964025	0.262730424181978	14.3475593512953	2.35118483988657	1.10652963435624	6.39118302494189	0.35102307131307	20.8929609488509	47.6744242522579	70.3997762729905	239.786328938383	0.110827633289066	30.1228891397103	100.768146357998	28.6477947093145	38.393211726953	14.0945495338229
Female	Mexican American	145	12400400	2018HU0371984	W	M	71	40	71	F	NA	2	24	184	854	854	71	184	5.02012949102223	4.32118869908869	0.0151478248908335	0.00743801544528276	76.4270372274381	152.561456218901	3.33482308274406	4.06584987845567	0.30281959734372	0.976009639341827	0.943536910963331	0.95478351197365	5.68568127632018	9.06498133260362	3.3348230874708	0.388114498133205	17.591417510388	3.33482308274406	1.70139487458325	9.06498897001698	0.369246440697089	21.9178686038571	61.9813553906323	86.4727825688138	229.905220786461	0.145958648995406	39.1029899411611	124.608759277745	40.7407310910492	51.0962026574966	19.1673309280515
Female	Non-Hispanic White	81	11304200	2017000278452	W	N	75	14	7576	FM	NA	6	13	185	904	904	75	185	5.08046687557247	4.30795653543541	-0.246616098841712	0.0228616942108807	58.0520740735624	164.568775303592	2.59312864509679	3.06606976287203	0.254354406408443	0.347416106700588	0.870261626375482	0.79269371461341	4.89583962778758	7.0235886414283	2.59306274045402	0.42034576950378	13.9909656016228	2.59306274045405	1.58630094884153	7.04867532742899	0.308210170067712	21.3874544830327	54.5242197524456	78.2244801728772	243.346885544799	0.131788466089032	32.7229161544362	109.44655784122	30.6697322871811	43.3531090208673	15.7753435477937
Male	Mexican American	234	14702100	2014000564393	W	M	13	39	6112913	FFFM	15	1	47	186	157	157	13	186	5.06242271954601	4.06936594218607	-0.118686746590932	-0.0206341315060371	51.9706530889952	154.746545473106	2.46320868501482	3.52066437559281	0.113381153255108	0.838741122923963	0.657621814338572	0.749426179545181	2.95566915387616	6.68401886779031	2.46320868501482	0.138645836750866	11.7361553810736	2.46320868501482	1.59933480079224	6.69569540817828	0.411779744247244	20.098761710757	28.742545694966	65.6379187422412	241.684324871753	0.278262849552952	24.5319983970111	118.327791459573	26.1412094627959	41.4499796913654	14.8829732014011
Female	Non-Hispanic Black	187	13603212	2014001097372	B	N	56	46	225656	FMF	NA	2	36	187	678	678	56	187	5.09578359444347	4.43548170283393	0.123560189697477	0.00193372175395829	95.4919444415387	163.647924153867	3.96306169165558	4.85707525280244	0.400679144678913	1.07003373595392	1.17593495460432	1.13614265979836	6.04700858295623	10.7727136234975	3.96306169165558	0.365826490982978	22.3770691401322	3.96306169165558	2.43311087186954	10.772718581483	0.444682692892575	23.0954978426406	83.7969932496514	124.915120187532	242.324926666427	0.181749628415547	46.0597398873428	158.493980516893	42.417572799011	68.4760321681541	24.0087158451241
Female	Non-Hispanic White	119	11703412	2016000908219	W	N	23	21	478859231316	MFFFFM	NA	3	17	188	287	287	23	188	5.09840901824902	4.26835772417398	0.224038731589087	0.0714442510219238	89.3352775980389	175.889027265333	3.5585082649742	4.71104206077554	0.338567488389805	0.956705018749411	1.26782668509905	1.18045256049001	5.53519118573309	9.67302788329501	3.5585082649742	0.427991717553669	23.6018445858406	3.5585082649742	2.09971917265677	9.67302835310067	0.69453261319842	24.1046986394134	70.880567755862	109.808079103836	255.796309705959	0.200232532168102	46.1025870677283	156.484280879377	45.864500316358	64.4284452384278	22.7563320559638
Male	Other	60	10609904	2017001350844	A	N	1	25	37144	FMM	45	1	06	189	16	16	1	189	4.36673667060774	2.35766675947093	0.0424612397980744	0.00135825097018734	11.0245874294651	78.893190728835	1.79538082284996	0.759738619076367	0.020129131961741	0.145542830461549	0.0330677341768916	0.155686710187763	0.238697618037981	1.79538082285022	1.26612946680105	0.00894708487869875	0.623559436994848	1.79538082285022	0.214739675340343	1.79538082285022	0.0345924994295904	16.6916875207556	4.85299168759057	11.0117119390074	145.818424821091	0.0464535910519366	4.02049784905874	18.6646990609775	3.94481248507978	5.80928829321372	2.40776729624852
Female	Non-Hispanic White	44	10606710	2014000743652	W	N	25	12	2725245248	MFFMF	NA	3	06	190	300	300	25	190	5.10290493944125	4.27652430034555	-0.0548367884666791	0.00145165009098393	68.1483885261833	164.738042244625	2.93808540097196	3.93597271464903	0.285563965107197	0.29411461611138	1.06233101666742	0.935499921036273	2.54773213969496	7.98290242308868	2.93808540097201	0.379991813726973	19.4739147273322	2.93808540097196	1.68779708359802	7.98654415592069	0.41307043022093	22.194829021525	56.939700532987	91.4260735826367	243.534581946981	0.143232925962456	37.7959592542757	132.139746032169	34.1172201538324	46.2294571867897	17.8881349962558
Male	Non-Hispanic White	153	13000700	2015000592365	W	N	71	13	749471	FFM	NA	1	30	191	853	853	71	191	5.1572394509383	4.47283887965097	0.120546859878355	0.0161426103490609	98.8284718174828	176.510799467701	3.48949778432511	4.68222499289373	0.183955813864712	1.45191079875619	1.40066117730354	0.659740575818026	6.54965188358626	9.48486940463873	3.48949778432511	0.431800046344807	31.2873058283182	3.48949778432511	2.51872480762693	9.4854384016113	0.525695477958893	27.3216892303019	47.630928239763	108.385267260293	266.754173791402	0.440530644948318	38.9020416449072	189.374502021335	37.0234332589418	60.3565207796295	23.2709524601142
Male	Non-Hispanic White	79	10900301	2017000236557	W	N	46	17	4646	MF	5	1	09	192	557	557	46	192	5.18309550071215	4.51822314312058	0.120445494261255	0.0409947625483121	103.40658423642	185.692162678654	3.57948179692435	4.64262377726111	0.213267173601628	1.49178251847926	1.23134443935139	1.3287256520727	7.01690800967754	9.70043585458297	3.57948179692435	0.360908347141075	32.8896454186084	3.57948179692435	2.58811948806616	9.73004032177964	0.498182708150769	27.8887023605685	51.0682729864966	117.088234826641	277.094523587844	0.525109067030966	40.5825965970907	192.061096137901	43.9896476130985	64.9759107868734	24.7963700802528
Male	Other	273	15500103	2015000184792	A	N	60	39	6058	MF	20	2	55	193	728	728	60	193	5.12345177949231	4.19756322783186	0.206239105295759	0.0270755454861566	81.7611615457723	172.522441727141	2.96533783169853	4.07757536617364	0.159632049575736	0.968107748168831	0.593453593133282	0.701538915112403	6.32144923908396	8.06062347614439	2.96533783169853	0.590402370038889	26.2248255974104	2.96533783169853	2.15686684217082	8.06062382471097	0.58958631897604	26.57229232763	39.8422191634769	98.3060558865942	262.220691890581	0.399888448955519	32.6009944690615	148.527817558072	30.1900608105721	51.2206809744235	19.4393234479326
Female	Other	253	14802316	2015000118277	O	N	52	52	52	F	NA	1	48	194	628	628	52	194	5.05652336292084	4.062893518413	0.317682647660797	-0.00778615624459512	79.8840466256862	155.825564707915	3.39529510053816	4.19432570301745	0.311861680545988	0.981142442021898	0.409670377553901	0.946604647828379	6.05209435339972	9.22936867664389	3.39529510053816	0.343048803360668	19.5815637688249	3.39529510053816	1.87965080404091	9.22936897391663	0.396360122769579	22.5278655493081	67.5353986474184	93.6322469301306	233.584621370529	0.143514830398304	41.1097973467557	132.484540664411	35.4441482057063	52.7389699471286	19.8272180125104
Male	Non-Hispanic Black	58	10603724	2014000690467	B	N	0	30	6303128	MMMF	30	0	06	195	10	10	0	195	4.28519508276005	2.18659044502124	-0.332548784112549	0.0266646224201538	6.38557577050209	74.5790551094203	1.09671153386697	0.15849329703226	0.0121799931393073	0.0928334029765075	0.0166388884819659	0.0607160853057292	0.101798200471539	1.09671153386697	1.09604452462809	0.00642149729272612	0.198978720916946	1.09671153386697	0.11053922148849	1.09671153386697	0.02299926891156	15.8271286889827	2.71551017507262	7.1548707443075	139.796217064232	0.0285086049102414	2.3065042803289	11.1886739320131	2.444102141053	3.4842507364022	1.41004624723025
Male	Mexican American	260	15151125	2018HU0760356	W	M	41	20	644165	FMM	20	4	51	196	500	500	41	196	5.13016983846616	4.44173103275622	0.129884710621303	0.0199937832795645	96.7002263670619	172.459706166618	3.46003049934522	5.01456969019845	0.186229930097267	0.839913930114418	1.71494730639068	0.721810424889098	4.35271273378729	9.34480264380085	3.46003049934522	0.515375542100024	32.2111883559244	3.46003049934522	2.54377802345099	9.4053380320934	0.283908328223924	26.9477959472789	47.9773584294989	110.727360515912	262.149173760289	0.484887238134786	35.5700561909244	169.260701009033	37.2988343870882	63.4947549432477	22.6761034147188
Female	Non-Hispanic Black	151	12202100	2018HU0236731	B	N	71	96	7174	FM	NA	1	22	197	861	861	71	197	5.05835532207637	4.33081799670787	-0.155476141805826	0.0742805207993754	65.0620776498992	169.463208264955	2.84022074204308	3.49364138870247	0.274972578911451	0.944818117942883	0.758408789678679	1.02663820198763	5.16082029658964	7.71551591735434	2.84022074204308	0.184222827439204	15.3758607534506	2.84022074204308	1.96488922014097	7.72052037681405	0.395725077016832	21.9074017687433	65.8552088683519	78.8787338058578	248.754979209876	0.141198624981988	34.9944548088963	117.260912954381	37.920215699315	42.4830380591066	17.6629762909596
Female	Non-Hispanic White	199	13601700	2017000583944	W	N	75	22	7577	FM	20	1	36	198	911	911	75	198	5.08063761108033	4.29986722967384	0.16185875501495	-0.0743773440059798	86.6369141110951	149.345179420065	3.87953416901849	4.94439241384128	0.34048547628316	0.305619659399456	1.1546711998063	1.16327950986662	3.05204507276021	10.5456672126241	3.87953416901849	0.42749841160153	20.3932467976436	3.87953416901849	1.94827079307928	10.5456672098004	0.500722854476519	21.3317827183912	79.1402163076005	103.798215751897	226.260436775694	0.169086598756835	44.0385284201259	153.68249619744	39.907830941001	56.9185925635493	21.9446273892088
Female	Non-Hispanic Black	179	12602902	2014000213839	B	N	5	73	3936541	MFFFF	50	2	26	199	66	66	5	199	4.73795544711595	3.06626228999347	-0.0834925970264601	-0.00446067190633972	19.7424214364059	113.692197543047	1.69566671459435	1.3684636727617	0.0803328590729326	0.22031517674068	0.0673484337591677	0.269272516294389	0.895185415391658	2.89058797103359	1.06518445643459	0.0379348519159859	2.47528039942815	2.89060958288121	0.523054132937439	2.89060958288121	0.128351215355073	17.3829111738305	17.0048020481953	22.1753849377192	184.400973798761	0.0354521368935922	9.84589704988865	32.2122207746293	10.1256955145504	12.6273425635579	4.9022807014964
Male	Other Hispanic	183	14201805	2016000493688	W	O	50	12	50	M	7	4	42	200	609	609	50	200	5.15382093257717	4.43058117085844	-0.249520842609519	-0.0675660639415218	65.4351992329621	161.782828108316	2.43806977954173	3.05064979775473	0.11895336601822	0.849250484038245	0.7230254118915	0.928259557781296	5.19136108124314	6.62601096016898	2.43806977954173	0.409802465309668	21.7360394451511	2.43806977954186	1.64097213781389	6.62736077824341	0.28306228627665	25.8389361871594	29.9679640608789	65.152836025832	249.880334782808	0.30471588718272	24.7098576347091	120.426698036263	26.3574988873551	39.8469707365827	15.2306423183933
Female	Non-Hispanic White	260	15151115	2015000527635	W	N	81	25	8081	MF	NA	2	51	201	972	972	81	201	5.04321485883873	4.10306622518987	0.393421137582453	0.0103864417832238	89.7014884679185	156.585361256665	3.89394357129107	5.0422695895914	0.334817228070941	1.19876680767616	0.567559152962597	1.12170015135441	4.96748587218469	10.5631962611664	3.8939435767777	0.700737016312294	20.135456460624	3.89394357128785	2.00944172263112	10.5848360508767	0.482698749157039	22.0361552050564	78.6437901658706	109.256109261894	234.438310740206	0.167477044697784	42.0469923455685	146.810990496506	41.3331110077866	56.7622326866001	22.8222388242602
Female	Non-Hispanic Black	148	12500501	2015000966459	B	N	9	26	41559	FMFF	NA	3	25	202	118	118	9	202	4.95792776410228	3.70203186138722	0.13836676945799	0.0252096182959436	46.5440246260817	145.931507131754	2.56506535012962	3.26224245261686	0.229139353429596	0.740599207334275	0.694530893153787	0.559879904647004	2.61824291448588	6.97138230995517	2.56506535045043	0.189721677107629	6.71784284953833	2.56509249035239	1.30297582352183	6.97257053006728	0.41335032243667	17.1453562669386	48.5652052518317	70.5078518843867	222.370419437582	0.103827542367264	27.8791668083812	103.812328004112	29.5206064199051	40.1190802846302	14.2598664448283
Male	Non-Hispanic White	119	11801002	2015000361905	W	N	35	24	936351814	MFMFF	NA	3	18	203	428	428	35	203	5.18067116883989	4.48910843737688	-0.0315861134699051	0.0247772455495298	86.2734863117527	182.262583612396	3.04259140205424	4.27535915594662	0.174766797293773	0.804232866796389	0.896263947842009	1.41544856073672	6.18652475132341	8.27058647236659	3.04259140205424	0.577869709692819	27.9856569505246	3.04259140205424	2.21987402221067	8.27062091630207	0.68865307166314	27.3552652694359	39.6148975093666	107.506955708962	273.247315238343	0.412781716387738	32.5442442966995	163.275396371512	34.0912514491017	58.2938870119237	20.7844982994647
Male	Non-Hispanic White	81	11303300	2014000311802	W	N	23	27	1923235257	FMMFM	NA	2	13	204	276	276	23	204	5.17784045556616	4.41680653358843	-0.0493495261117992	0.00455974333434329	78.8428796987369	178.109797301995	2.79244234272267	4.05664845640532	0.138339445174752	1.1546486248638	0.936217911750627	0.809370240034977	6.16281928828566	7.58809961045059	2.79244234272267	0.454360138922973	26.0126023147424	2.79244234272267	2.05959060446528	7.59064527685962	0.362051218321799	27.2343805250653	37.1418213928756	93.3305286246943	268.564508468875	0.373435637331059	29.7758294073603	153.314341624828	26.4958199147132	51.4484791176456	18.7487726300247
Male	Other	116	11801002	2015000180638	A	N	87	28	8387	FM	30	2	18	205	1051	1051	87	205	5.27392064588372	3.30452288295058	-0.277106947679954	-0.0478635253792331	20.6438186429293	186.057752067187	0.858130001203798	1.16173361759714	0.0468261899204736	0.198782335869836	0.198420856020688	0.313470981012978	1.25934970416159	2.2935019485829	0.843752419996813	0.116980284083702	7.24912689787996	2.29355687099568	0.558287859742851	2.29355687094259	0.139683023834778	24.4666778472852	11.9776954527833	29.0196553920317	277.503579249699	0.112872662242121	9.1851373527239	45.6272623964327	9.82768222439549	16.1127714865252	5.85360791374276
Female	Non-Hispanic White	48	10611103	2018HU0580778	W	N	54	34	561954627	MMFMF	NA	2	06	206	658	658	54	206	5.09382215534671	4.35897320880093	0.722768608991243	-0.041656729451256	160	156.360685635522	5.98671496492336	8.25303946269904	0.485467125043353	1.41453808855103	1.17975354604108	1.8797355752948	6.0865569434195	16.2735620756268	5.98671496495228	0.780868902518642	34.0757338821025	5.98671496492336	3.57590422145157	16.273578494774	0.754305286531662	25.7258422920505	121.887209568948	169.098974148545	234.185978599611	0.27416486560943	67.8644212048641	225.600321363642	71.5001870505604	95.5774101591971	35.0501175664378
Female	Non-Hispanic White	156	13400400	2017001331091	W	N	41	29	41175949	FMFM	30	4	34	207	492	492	41	207	5.0983724468077	4.28595947958791	-0.180777383094693	0.0509434143639235	60.6537883842185	172.313563582822	2.71478418983691	3.67423692494946	0.253494825536022	0.699574884166352	0.857700880018315	0.899833045841691	0.546759395084892	7.3795484446364	2.71478418982293	0.362711749962111	18.0915537749604	2.71478418982293	1.52456216881647	7.37954853133767	0.386015548960882	21.3420294738694	57.5750301587821	80.8347256991105	251.886453969632	0.138122066769512	32.2336802989098	116.394942455136	35.1857849022842	47.0702200082931	17.095434071683
Male	Other	192	13905402	2016000919427	A	N	16	16	3151637	FFMM	25	1	39	208	202	202	16	208	5.15468597898617	4.2663353344413	0.304717584840207	0.0451382959643171	96.6458164626117	181.240390600088	3.62190300776991	5.26536179311268	0.205842024882896	1.13141168037544	0.848775913969374	1.19359635523179	7.06708907424813	8.79280227785156	3.62190300776991	0.41291662863672	27.7623291539112	3.62190300776991	2.64554495021378	9.84535264295123	0.535218589434582	25.6837119203031	49.3125343278825	105.554543359815	272.097156936024	0.497655016579365	39.6890281676748	175.066792624746	40.347285271649	66.1532983308859	24.6377377778057
Male	Non-Hispanic White	261	15310503	2015000254882	W	N	76	15	766976	FFM	NA	0	53	209	917	917	76	209	5.15432973320797	4.42868976133239	-0.32540226885209	-0.0419110676019921	60.5389822637573	166.071541035001	2.33879636965316	3.14062232497349	0.118289542080073	0.88776138282952	0.885861910292271	0.517466957877892	3.87567569342494	6.35750629787489	2.33879636963229	0.0829585950210591	20.4978318501923	2.33879636963229	1.45515515273821	6.35750752524866	0.352507011360139	24.8846742921651	30.9065052553536	66.8240176684036	254.83212375081	0.307325827027139	23.0861980858831	110.93876780584	22.635023468144	38.1353588692558	14.900011147352
Female	Non-Hispanic White	76	11201900	2014000477794	W	N	41	8	1541	FFF	NA	2	12	210	501	501	41	210	5.09365230367719	4.27595188993727	-0.159842947096923	-0.0211725573359275	61.3201771437245	159.569529096688	2.63337348960177	3.30188566892389	0.263451537971672	0.766281184960565	0.604321036840048	0.723570737343568	3.76445602171735	7.15761028489994	2.63337348954288	0.449572395547824	17.3262952861186	2.63337348954288	1.37801857962652	7.15825130417018	0.303459490749161	22.2857881296469	49.031566962314	79.9577501278344	237.781294461491	0.133515330713223	30.5845992102446	109.501055012971	29.1370654197259	44.489200936097	15.654173928602
Female	Non-Hispanic White	168	13200406	2017001303327	W	N	7	11	233174981632	FFFFFFM	NA	2	32	211	92	92	7	211	4.83305237198975	3.27517916182399	-0.557387486243654	-0.0293325986892566	15.146836156324	121.96325042128	2.23603807527957	1.03673408241659	0.0601083404695992	0.156186043089003	0.0495858579749517	0.219270970042512	0.788798062859567	2.23623870921452	0.822666535327333	0.0381028434003405	1.98079947006069	2.23623949379447	0.391190107606284	2.23623949379447	0.0729806955827169	18.4118783326373	13.1801352651814	19.1131801850954	194.373456211374	0.0318852357854972	8.70714161288525	26.1657968739728	8.03730681797712	10.2321891967386	3.99761344440514
Male	Non-Hispanic White	154	12500701	2016001032795	W	N	28	37	61124128	FMFM	NA	1	25	212	343	343	28	212	5.20165164908212	4.47841534167323	-0.0283681993300261	-0.0153967440074026	85.6309807521324	178.797683184562	3.12043708162474	4.5089233115959	0.172783286010853	0.930137594640586	0.838520360032066	1.30464148564782	3.61751862496471	8.48080447758873	3.12043708162474	0.569387697089307	28.9450769305627	3.12043708162474	2.20520091150752	8.48222741579737	0.535324209478055	26.4419828095192	42.5557432370459	101.797789850865	269.342059841063	0.423519014902651	31.6080616485768	167.891884632975	31.7756813974482	51.2747769067842	21.0116237792311
Male	Non-Hispanic White	76	10900903	2014001427913	W	N	5	32	526	MF	NA	1	09	213	61	61	5	213	4.70929270671752	2.9735057668607	-0.0604578246232685	0.00586871070945552	18.4128343822975	111.62682823493	2.12563282032328	1.53299624675868	0.0405188187137929	0.28040859862974	0.132805785963678	0.145536638117382	0.62828613898213	2.72829301663733	1.00369159432947	0.0124925573094595	2.78564449598946	2.72829740441161	0.527845693187178	2.72829740441161	0.143495353226609	18.3452408930542	9.35855738736556	24.5297284412236	189.173021506905	0.0908038014047342	7.54159616259766	35.2249431597223	7.72675657293524	11.3789332179802	4.74675085341105
Female	Non-Hispanic White	181	13603708	2015000312809	W	N	65	4	65	F	NA	1	36	214	782	782	65	214	5.08637301485907	4.31400748159777	-0.451214620177193	-0.0684186074012159	47.5981008066095	151.101894530749	2.20627341264479	2.61364514365963	0.195175547246196	0.537256358017823	0.852870750896301	0.683458895817043	3.11723130558947	5.99724649186268	2.20627341264473	0.231675018254725	12.1815937743948	2.20627341367409	1.10940960775849	5.99727290077461	0.320493418535102	20.573981055028	45.7115825357942	62.0891042391664	228.253605630731	0.0994584718875966	24.230326747499	90.0686297300025	25.4793554522361	34.0485222389365	12.5897465360844
Male	Non-Hispanic White	119	11802302	2018HU1167174	W	N	1	23	12828	MMF	10	2	18	215	21	21	1	215	4.44830597329591	2.51171109786544	-0.0728627209082176	0.0405631869325674	11.4598357297628	89.0207207658793	1.91521230679085	0.791880029369696	0.0239208260399847	0.123710225587714	0.05963911127172	0.147771151370611	0.330208474064004	1.91521189051838	0.895948519172398	0.017499242096653	0.703020609909935	1.91521230679086	0.261607321699077	1.91521230679086	0.0642928449255011	16.2650705150996	5.4753331601666	13.3987085680494	159.643445214108	0.0525672412127508	4.71860221978552	21.5174279379037	4.17757489292054	7.29829674701443	2.81198851211353
Female	Other Hispanic	186	13902700	2017000498939	W	O	35	21	163513	FFM	15	3	39	216	422	422	35	216	5.06427848755861	4.28467381481349	-0.0730973847435512	0.00163963046383045	67.4628064238159	158.525920785046	2.89022204238405	3.85114240365895	0.278653125053797	0.581369422299635	0.805683670321101	0.733920380973956	2.81141971281409	7.85554171253553	2.89022204238405	0.387237964280758	19.1200192743621	2.89022204238405	2.06562647567871	7.85643805799805	0.390689016444531	22.3417382590329	57.3221978700881	77.7300486864337	236.613994730881	0.135866073484061	34.3128232150815	120.943793903338	33.5681765344249	42.5561287770508	17.0966745776934
Female	Non-Hispanic White	154	12500702	2014000059463	W	N	5	47	53646	FMF	NA	1	25	217	62	62	5	217	4.69838562974303	2.95429238279469	0.0977730850466397	0.0255757932593164	21.1590025591214	112.613479848417	1.19950103795495	1.7326626131372	0.0764598638090341	0.185071695500678	0.18663090977674	0.301830264766607	0.781634692010925	3.25998263420367	1.19968104383337	0.0370505950397087	2.74768713289409	3.26049776507925	0.412561760051342	3.26049776507925	0.123201328710428	16.6388407191119	19.0559238907909	27.2098718254081	183.087206549973	0.0487313749863297	9.86957666545521	36.3078040078649	11.7959756736679	13.3617433548438	5.49019072931445
Female	Mexican American	118	11703207	2016000429919	W	M	11	53	357113114	MMFFM	10	1	17	218	133	133	11	218	4.98892911399898	3.77429838477095	-0.146235747129219	-0.10661522844655	37.6398239552918	131.935594828853	2.36463392899596	2.29353135326494	0.143536729481183	0.55940038896614	0.289668493023319	0.519722441180648	1.24718776849512	5.00287089869792	1.87331780330244	0.103951268362472	6.54174904361037	5.09220574364579	1.05651042742201	5.09220574364579	0.271980480464527	19.0925992423451	31.5742652117976	48.9736660299241	206.175330303044	0.0771534360571219	19.5380604301911	70.7850820286095	18.2714077022365	25.0954919532271	9.65579792146132
Female	Non-Hispanic Black	181	13601700	2017000301288	B	N	64	113	64	F	NA	1	36	219	771	771	64	219	5.08165566122944	4.4055447184871	-0.182905070471999	0.0562605798468066	68.2133059697429	170.360408186666	2.97549479233814	3.60113657551369	0.302528888511903	1.14689346225122	0.955300427328106	0.97748487197693	4.44756573551479	8.08823336411071	2.97549479233814	0.178490636331681	16.5361443575171	3.16487669976276	1.85962266246918	8.08823342434676	0.400798663080137	21.9250295263132	61.1050747184314	89.9246751801085	249.74207652827	0.152148780420496	35.2882775163297	126.056887727405	37.7353378730522	48.2246629744459	18.5776562034395
Female	Non-Hispanic Black	109	11700800	2015000691352	B	N	66	15	66	F	NA	0	17	220	792	792	66	220	5.08820847636728	4.39634885112376	0.192102495904589	0.0192465333982361	98.3420145199154	165.249261504973	4.21438330613854	5.21517339247973	0.389094037396949	1.05066517367687	1.52536476706857	0.929868119582611	3.71305505384177	11.4558347210103	4.21438330616054	0.488809591590185	22.6130026562335	4.21438330613854	2.50765513433921	11.4558815591099	0.660882707625644	22.3348529016508	92.320915122591	116.982548297653	244.101169371395	0.198884697116145	53.4130640482711	191.855173999794	50.402703625471	68.2711024059932	25.7183973301925
Female	Non-Hispanic White	111	12100900	2014001267943	W	N	55	21	55	F	45	5	21	221	664	664	55	221	5.09698581783995	4.35659286416035	0.113160531256167	-0.0536258935960565	87.3351831011775	154.989895464694	3.75018915783797	4.85569691148477	0.353361796344986	0.91992640376905	0.522545345712257	1.10654209991346	4.64702789185608	10.1932945436916	3.75018915783797	0.388642423643506	21.0078632164399	3.75018915783797	2.2098200266332	10.1940710410351	0.542032301401779	22.2882074544547	74.4637123303273	105.636648643827	232.644480560069	0.176592053525844	44.1539679699738	146.642917529593	40.4246685337921	52.9535455486264	21.8115202156804
Male	Mexican American	151	12500702	2018HU1387816	W	M	63	12	689563	FMM	NA	2	25	222	764	764	63	222	5.13393241572286	4.41786006778925	0.275806384474165	0.0499714402300347	109.2530173396	178.377814807517	3.90876801227679	5.14257400873938	0.210286009402115	1.36157699432309	0.773043441096454	1.22924612029804	5.57974001257542	10.6248891835162	3.90876801227679	0.574426247281895	34.4930794284736	3.90876801227679	2.48278739462438	10.625132402787	0.450063174552912	26.9507550707676	53.9926192715901	124.011005062479	268.867551001661	0.554766877744922	44.2077440535238	214.394231229132	41.8235469562458	65.8822203120589	26.2735220723623
Female	Non-Hispanic White	191	13702700	2017000773401	W	N	34	54	31263420	MFFFM	NA	2	37	223	410	410	34	223	5.10574494342705	4.29646148188176	-0.176568774354552	-0.0400874845458208	61.552637775415	158.484604939585	2.62185569462258	3.47284833292059	0.23716050332746	0.513675078293925	0.744794350869609	0.672809012319484	3.21507803369587	7.11906675926285	2.62185125373146	0.315253291157453	17.2733191893164	3.51095696077524	1.58710965490957	7.12693061993982	0.313130342009735	22.4767848434626	51.0787054865966	71.1233170081344	236.567742551549	0.118902424523631	32.1223596852424	97.8382022573038	32.9508766519422	42.2906343245047	15.5061358100298
Male	Non-Hispanic White	117	11900400	2014000856246	W	N	76	9	7674	MF	20	2	19	224	920	920	76	224	5.15239412759377	4.42349850568135	0.0339238466726735	0.00292441977620251	86.2648618484551	173.351018475661	3.16496813622168	4.18017959908226	0.181694836383044	1.09526034367227	0.775349595040575	1.0597284815849	5.78165104529641	8.6031160892647	3.16496813622168	0.22573121209989	27.5671162375268	3.16496813622168	2.08617029366087	8.60327533718081	0.613515898557327	26.2561549233913	43.5986085745991	100.799507993493	263.164655139396	0.429191441400535	34.5896247488223	178.02329724681	35.228605981402	56.9195025377442	20.8226937023989
Male	Non-Hispanic White	149	12503900	2014000002134	W	N	15	54	1546	MF	NA	1	25	225	186	186	15	225	5.16251137299332	4.2209716887246	0.101759872109249	-0.0451019552705127	75.394291366938	166.90243459724	3.07736430217507	4.64181249980333	0.176969250641901	1.05881004544294	0.788551363835205	0.927839733338483	5.61578834624091	6.71691824150278	3.07736430217507	0.436732595577467	20.8933306031825	3.07736430217507	2.03653132679875	8.36514346178541	0.521668750589178	23.4996314910294	38.0806374864904	96.6168465693613	255.787764117412	0.371986089807824	31.340376986658	161.316484051588	30.2964813234388	51.4329096502372	19.6788033557025
Female	Non-Hispanic White	119	11703417	2016000145659	W	N	34	22	134436	MFMM	NA	2	17	226	408	408	34	226	5.10656718363343	4.30119662302322	-0.0900500719081525	-0.0366916545254861	67.4338118156298	159.154516005773	2.87555521417015	3.8278390114622	0.261050663251482	0.348065506188972	1.0291365755211	0.977331919947852	2.95127787960758	7.81653128813009	2.87555521417015	0.299902666271004	19.1794592294487	2.87555521417015	1.92011198119468	7.81656948540934	0.390561241159471	22.4507101388037	56.6885846602122	84.254301483346	237.317322107191	0.145033408238826	35.3214508638224	110.637525615069	35.4713361098471	45.6369646341061	17.0604765749558
Female	Non-Hispanic White	109	11701602	2015001332564	W	N	50	22	50	F	NA	2	17	227	602	602	50	227	5.09629545887754	4.31882415582408	0.0675255479034353	0.00431017288086891	80.3465941597445	164.121274262894	3.33401975482228	4.48350103885348	0.312092712956698	1.0463030200292	0.803435162925079	0.776178440633213	6.45842682447325	9.06280158761837	3.33401975482429	0.378363651025325	19.3753883393952	3.33401975482228	2.19787182471982	9.06280531525689	0.463122010986781	23.0990156232674	64.2266756880166	97.6809135300434	242.850428784287	0.167492694039603	41.5095519205227	147.657474475401	38.4148229998743	48.1599226733665	20.2417031758469
Male	Non-Hispanic White	188	13900100	2017000409575	W	N	77	21	7777	FM	NA	2	39	228	925	925	77	228	5.1501799690243	4.4236039779593	0.0435734979432382	0.0308466959161892	87.1105042003883	177.865325380469	3.20658145206425	4.49691950971312	0.16850986994761	1.0887340993452	1.22375808960794	1.07637541603426	3.95113191654157	8.71639043976865	3.20658145206425	0.510239333439543	28.4049731909654	3.20658145206425	2.29290327017089	8.71639209261724	0.509485592680198	26.1661598193024	42.2734399095175	104.820638371186	268.287989066998	0.401590563010546	31.9199226952867	178.071725098662	35.934293805081	59.5798376948446	21.5071822388463
Female	Non-Hispanic White	224	14500105	2015000015341	W	N	20	24	20325523	FFFM	17	2	45	229	247	247	20	229	5.10741672475097	4.17413667780911	0.0493369297976052	0.0674537277575247	68.2702168379159	176.773712202032	2.9089512500096	3.61367115815691	0.288739956914965	0.76789486561614	0.576487960388044	0.902881579766401	4.01188057086108	7.90734887316878	2.9089512500096	0.432971663350208	19.1949092872959	2.9089512500096	1.38277652775329	7.90734929529732	0.313547666681653	22.4690137339671	61.6282207273756	88.0582989527252	256.76065564866	0.160324680740821	37.8933662344477	136.061869419772	38.961607530997	51.2984091652123	18.6726057550613
Male	Non-Hispanic Black	188	13902100	2015000261339	B	N	28	94	4828	FM	NA	3	39	230	345	345	28	230	5.16469422932635	4.43715944686328	-0.255945159325287	0.0530795938284465	65.4452743652763	184.522945786628	2.44083578303571	3.5885659950768	0.141681962389109	0.489981141111304	0.576753674834392	0.828700935447119	4.38482185663198	6.63487043580907	2.44083578303571	0.398393554847892	22.444724123072	2.44083578303571	1.64516423595983	6.63487955526248	0.405558890127719	25.8126495113411	36.5498843025563	81.3823071252268	275.784939781006	0.382023818415047	25.5646649379849	123.870328874216	28.030026152936	44.6780118395565	16.8286437359957
Female	Non-Hispanic White	154	12500100	2017000074148	W	N	43	15	1064543	MMMF	10	1	25	231	527	527	43	231	5.10788956446388	4.2956572004262	-0.33261881746962	-0.0288619240931667	52.6169537766421	160.617801707146	2.18949930582781	3.17622184066522	0.196405088740732	0.372844929556559	0.567896394516293	0.56765731663004	3.25785218313157	5.95167614686242	2.18949930582781	0.368750215551511	14.5950403804924	3.99538468481419	1.36767965253412	5.9516761128255	0.264746075707678	23.0315005520171	45.6672987603665	66.059569913602	238.951891502126	0.0975631115387518	27.1213574190608	86.9313674917276	25.1246592826035	32.2553098488396	13.0796250142537
Female	Other Hispanic	47	10605904	2016000353558	B	O	63	10	40663343268	MMFFFFM	60	2	06	232	758	758	63	232	5.04866464256349	4.24492634309523	0.0475740396940209	0.00622331284843467	73.1491408819311	156.786962229382	3.13408628703118	4.18810105656579	0.295181969165856	0.864855459883502	0.856284179147194	0.79701771162918	5.58859743670624	8.51739048568725	3.13408628703076	0.669203324244787	17.4613616393862	3.13408628703067	1.66624660730324	8.51932979363485	0.414207261185311	22.3398618234072	69.1059750809736	95.4854500031003	234.664650812319	0.149728754297132	34.0443165249757	129.803512043895	36.9406236537718	44.766350451037	18.3864816040433
Female	Non-Hispanic White	154	12200200	2018HU1040016	W	N	35	7	5354410	MFMM	NA	2	22	233	430	430	35	233	5.10648781373296	4.28764672503325	-0.289483393058094	-0.07680512633686	54.4979633897289	152.884492821525	2.33609041558383	2.91594968163286	0.216816121285526	0.834902550131073	0.577831674217354	0.676349017468489	3.73045025324374	6.3474977681778	2.33608997748413	0.345691475270855	15.5758844923641	2.33608997748413	1.34591200903451	6.35015093486807	0.252496198056257	22.3287090455637	50.7061002429129	69.689810848458	230.270228585281	0.109437274478222	23.666561879369	86.3630818164775	25.1016082459174	32.7399792902298	13.4482993277764
Male	Non-Hispanic White	227	14500400	2016000783799	W	N	32	35	432328	FMFM	10	3	45	234	395	395	32	234	5.18788955708329	4.50009910972577	0.0366766786283351	0.0445723277635083	93.3892076109228	187.253232421562	3.19694104202783	4.01590590170317	0.180316038147149	1.15887475115117	1.04721628953579	0.997167922348065	8.54581629457103	8.68983651946374	3.19694104202783	0.70722143282553	29.7734929955944	3.19694104202783	2.17861474466658	8.69018673273758	0.584483657457855	28.2120518906053	44.5378216517329	101.151559336081	278.839794756814	0.430126446802603	31.9327546774577	170.628603775163	36.8363077178371	55.1503905809602	22.2858596002169
Male	Non-Hispanic White	203	13900802	2016000270845	W	N	1	50	3461439	FMMFM	50	1	39	235	18	18	1	235	4.41417292146946	2.44738664631731	0.262053690515726	-0.0429179923734244	15.0208665362609	79.1428881196994	2.42457215679514	0.959205653261392	0.027007760950757	0.149771852494093	0.0955620809966373	0.156411295386109	0.555817726771448	2.42470950211259	1.16829195831349	0.0211182487345827	1.17620028460362	2.42471015279857	0.302264901408936	2.42471015279857	0.0807772828823176	16.8395172949229	7.05738631920547	16.0447787624533	146.164425159548	0.0642144137082586	5.3422899865868	26.5188906873718	5.50943674415185	8.57971857794249	3.25947039368641
Male	Other Hispanic	58	10603721	2015000898299	O	O	18	26	16141802543	FMMFFF	60	0	06	236	221	221	18	236	5.15776222110511	4.31209937389469	-0.126896219866868	0.00220760448482055	65.7068481717788	174.159200374694	2.61242591410981	3.93885402853185	0.143893549034651	0.81449757280614	0.750268875625784	0.847302079444944	3.72430753023207	5.24337459538261	2.61242591410981	0.33247853734585	22.7282431842417	2.61242591410983	1.32746374929269	7.10130989050588	0.237400096659725	24.1516599253147	34.4314044026193	85.0575450782962	264.084297295134	0.369039938551921	27.4051197480505	131.994939431929	27.0008092755392	44.7183206296749	17.2475165440822
Male	Non-Hispanic White	187	13603301	2018HU0856131	W	N	59	17	5959	MF	NA	3	36	237	719	719	59	237	5.18320852522095	4.55848797780117	0.095371828867097	0.0846492546385573	104.989443464332	193.999926434473	3.56113973369992	4.77394883539207	0.202479254083715	1.21516067269726	0.987831962609683	1.0767297568039	9.0731030183816	9.66844206845219	3.56113973369992	0.555943875705654	31.913626376864	3.56113973369992	3.17475184109418	9.68018141030564	0.850227756368443	28.4819780506762	52.5789655896112	118.975751929885	286.341262729114	0.506336722630848	38.1826298654846	203.553429358151	42.7098035890145	71.8342609350991	25.4925312025614
Male	Other	60	10608507	2016000816231	A	N	11	20	1141923	MFMF	30	1	06	238	136	136	11	238	4.99440782091034	3.74194509558963	-0.119769916283259	0.0107078016417902	37.4188721205872	149.174330078058	1.80047835750093	2.62735109072274	0.0838209040069919	0.545284618201964	0.356203711016482	0.518970411129802	2.33573634279324	4.8313610702129	1.80047835869556	0.148056570172807	6.32682815928168	4.89420760172858	1.13290655578339	4.89420760172858	0.156024545620589	19.782739188573	23.2644437568131	47.146097544432	235.127450065808	0.213384680907725	17.9514069932781	77.50312369392	16.5366336177944	25.4664589054072	10.5835471274467
Male	Non-Hispanic White	19	10102701	2018HU1230691	W	N	63	31	6363	FM	45	2	01	239	763	763	63	239	5.18475032837632	4.49100201483586	-0.0910698459107663	-0.0489609512357696	81.4453439523698	169.998459822327	2.9545291917989	4.15414801925421	0.156663704301463	0.903217578176087	1.37395529450813	0.83476227933525	6.00101956964927	7.99268465959253	2.9545291917989	0.451709586788698	26.2052880504447	2.9545291917989	1.85479926937972	8.03124300935384	0.358001790951567	26.56626814805	41.8273708995463	99.8100834529069	259.338205803064	0.388463611889955	31.3294428306537	151.20987760803	29.1529739788701	50.1569100662211	19.1555574898476
Female	Non-Hispanic White	178	12401004	2015000017429	W	N	48	66	4448117	MFMF	NA	3	24	240	582	582	48	240	5.10312265602558	4.30307709770116	0.454490866516981	-0.0107245379053737	116.462340614376	162.779759447363	4.55626322534549	5.68484612203573	0.404173561513601	1.16863992470106	0.9685476542108	1.30112564545132	4.28952506387721	12.3709803210789	4.55626322534549	0.631320995333552	30.5556488666158	4.55626322534549	2.8331204299005	12.385207531104	0.704396852261417	24.5609333469853	87.7655258186329	129.4098530963	241.360121728747	0.220000395919046	52.7982675915568	185.58159473917	53.4913888535742	74.5049639155302	27.49250616744
Female	Other	122	11703601	2015000849670	O	N	50	35	50	F	NA	2	17	241	603	603	50	241	5.06864415971081	4.16413217919102	0.0738410397096382	-0.0150475746762712	69.267319778471	156.584622866447	2.87822180211112	3.55280477204788	0.278107299551552	0.644626600261852	0.834933727939177	0.795222201055593	3.72095426118942	7.82373382566429	2.87822180211156	0.34772206451451	16.8238913594582	6.12005586621711	2.06521636137502	7.82381802102908	0.431332643704254	23.0660117742367	57.9351958805593	80.1553129593192	234.437481605912	0.136134786605439	32.780101855991	107.958488621441	32.7239107773479	45.1613288901425	16.869076769754
Female	Non-Hispanic White	225	14702503	2016001323817	W	N	28	42	2628	MF	20	4	47	242	342	342	28	242	5.10113813806996	4.29340355430423	0.139985928959254	0.0019753781556244	84.2163837154524	164.533388008182	3.50690893288494	4.62861263865383	0.336726777611408	0.663188141954485	1.22146474744267	1.18511988707983	3.42790465695988	9.53276467764513	3.50690893288494	0.339213951652604	22.9135726867774	3.50690893288494	2.03237202930893	9.53276682628321	0.494099110234968	23.014419914284	72.2500343028458	93.7590945042912	243.307639249773	0.161913436489139	44.817845378736	139.668486939248	40.8767537511605	55.918162934025	21.3314433381044
Female	Non-Hispanic White	45	10607322	2014000694194	W	N	78	20	844978	MMF	50	3	06	243	941	941	78	243	5.069457035026	4.24333868434891	0.0557513803178889	0.0511283262667308	73.6327621550691	167.433349943531	3.2909571327326	3.87965936330076	0.300709604499709	0.754850877583721	0.93471700129601	0.998831263799029	4.12785517283568	8.94574879823694	3.29095713273261	0.278950198298772	17.6500156792356	3.29095713273269	1.80826885961098	8.94574897214451	0.454431433896509	21.3742696076776	70.5766700175264	89.7010476627144	246.516895218773	0.159014885115993	43.3214781214851	158.015703289792	39.8409203405917	53.0622115410299	20.2819133664829
Female	Non-Hispanic White	83	11209508	2018HU0272255	W	N	7	12	38739	FFM	NA	2	12	244	87	87	7	244	4.81153744724407	3.21123746849501	0.0473538803596614	0.00817578348878515	26.0128682650789	123.929546498337	1.42017312287342	1.92416862716916	0.10963198226296	0.312207653960164	0.166084408636581	0.330437580048628	1.28765039145875	3.8540908723365	1.41834595574086	0.0347623349819301	3.34746331433261	3.85496520923476	0.739814403402503	3.85496520923476	0.20609221691548	17.342657438834	25.8217967751345	34.7719899853073	196.71902343465	0.0588473368236338	14.2804628822392	48.6781162823441	14.6358698948758	17.3191917195574	6.97448829068901
Female	Other Hispanic	223	14202402	2014000161104	O	O	63	141	6366	FM	10	3	42	245	763	763	63	245	5.04809445218875	4.24527968387758	-0.0876022414190627	-0.0599393881756845	63.922885477878	146.665585116755	2.6491401842258	3.52238313141204	0.195069878402699	0.739962862159749	0.938049209372149	0.7648379990522	3.57025127230168	7.20110148441265	2.64913719385881	0.41779777365024	14.58573338085	7.19772530073989	1.37602608830231	7.20110149513614	0.306427837639834	23.129699898618	46.1577793394958	73.8754816918814	223.208834008593	0.117833113793599	29.5366455903836	105.154170374199	28.6962179779058	35.7395475695737	14.7827706042038
Male	Non-Hispanic White	202	13603312	2016000211935	W	N	2	132	3526333	MMMFM	NA	2	36	246	33	33	2	246	4.54599818490237	2.68529334429388	-0.185304942107188	-0.0104790846004809	12.1823526712323	93.271920221778	1.80160238683243	1.03663318018544	0.0244764581874417	0.0854840582922435	0.027694355067751	0.14572624988355	0.252658633657355	1.80223856419338	0.822288117551634	0.0139694445362221	1.82807568552878	1.80223856429751	0.29432359458257	1.80223856429751	0.0630867917424616	18.3744086660347	5.56625299627158	12.9659139509759	165.327824202941	0.0516456570785274	4.52498826168702	19.4128719034043	4.17879230677142	6.97785677292178	2.74033561761742
Male	Mexican American	250	14203207	2014000095301	O	M	63	41	2762634	FFMF	15	1	42	247	764	764	63	247	5.13393241572286	4.41786006778925	-0.171550211748731	-0.00631116221980668	69.8471900146007	168.615546974658	2.64988592731868	3.60109209052254	0.138449533166524	0.671701520599877	0.816522837708656	0.687892790532467	4.41117817998348	7.20063506843824	2.64988592731867	0.276629094327843	23.4352701147563	2.64988592731867	1.70510915589603	7.20313667138197	0.400936211537209	25.3585648327423	33.3030555355943	75.5952874922768	257.754332337659	0.349393970941907	27.6855235770372	133.342482564034	29.3204684422587	43.8708533382816	17.0754894491746
Female	Other	263	14949002	2014001339573	A	N	22	75	4122191642	FFFMM	NA	2	49	248	268	268	22	248	5.07787507084232	4.06554442734647	0.0419465432012503	0.0168867242869949	60.793992136645	163.164973303536	2.64198084824286	3.12467370990259	0.243963545323905	0.638338903719805	0.92723618916417	0.63784870934234	3.26935832655037	7.18161307459798	2.64198084824105	0.33498097959738	17.3397261067202	2.64198084824105	1.45608374048384	7.18164852983614	0.34161847152296	22.0107618596554	59.5918592384745	75.4703978747687	241.788374238556	0.131015470661952	32.9382636912436	107.958739862178	33.0150684242661	42.4452527584702	15.9700063516401
Female	Non-Hispanic White	151	12503301	2018HU0496337	W	N	77	26	8277	MF	20	4	25	249	926	926	77	249	5.06624575117451	4.27694921613819	-0.187812745855739	-0.0578168770056399	59.6883267994534	149.669401864169	2.60171917320208	3.0307009156546	0.228698577586128	0.646429329588468	0.489342467236599	0.804304293139997	2.72304095391699	7.07220446560345	2.60171917320208	0.215235848221483	13.6686391901607	7.07218483435052	1.1967854438818	7.0722059512687	0.364660589464607	21.9418791290958	51.99997903383	69.6478477847979	226.628738699115	0.118815664828198	29.0352310589573	100.651010021791	30.5650842561512	40.4995673252833	14.7406083668023
Female	Other	257	14935005	2017000354496	A	N	1	19	3511	FMF	45	2	49	250	12	12	1	250	4.31797188783579	2.23563906979509	0.366989128259418	0.0465681426763544	13.4991699457559	78.6132319362929	2.12023331791239	0.840914080661651	0.0434564729620849	0.0768758854380897	0.0523005544521872	0.12938783784409	0.278615337969426	2.12029395076103	1.91827534800787	0.016594042671575	0.819227794242213	2.12029395428174	0.289502906704493	2.12029395428174	0.0580169716832705	17.3063495694677	8.99584366893071	12.6869306789601	139.825684134936	0.0221218013510443	5.73748687269498	18.4748699922875	5.86816321853524	6.90629198388288	2.72664472848901
Male	Other	127	11600400	2014000174572	A	N	86	47	8679	MF	NA	1	16	251	1042	1042	86	251	5.25872771447033	3.38037681875668	0.290367237611673	0.0438609336894327	39.2811223588428	200.856083307269	1.51954613015147	1.86199651143278	0.0925580517966078	0.608237829164621	0.343110063875469	0.49692235681698	3.48970179790393	4.1206538372317	1.51954613015147	0.287376085032037	13.3680135165997	1.82899937628341	1.07447780527751	4.13055463237545	0.214476093752999	24.8505622235346	23.1605710859684	57.8629253801091	293.897914380438	0.206943041746084	17.0397260069687	90.6908627002108	17.6143676961528	30.0203476092489	11.1647859614096
Male	Non-Hispanic White	103	10800822	2018HU1004597	W	N	65	71	6365	FM	NA	0	08	252	788	788	65	252	5.16559166479958	4.48536747737526	0.0210467460686372	-0.00886255736941699	90.5963770142247	173.595713036332	3.33413425867857	4.27426539883933	0.190283774216505	1.21264683008746	0.543581481292966	1.17064275439525	5.60176132475941	9.04021705183768	3.33413425867857	0.7829410893801	28.9173131891853	3.33413425867857	1.96756420677153	9.06311656894782	0.298663546978637	26.1723841889112	44.9440175979148	97.4163323699179	263.443209621447	0.415101458568757	34.1293764074493	160.945581012674	33.9875530150465	54.7808653306472	21.9588757603777
Female	Mexican American	263	14949001	2017000655672	O	M	1	23	5212825	MMFMF	10	4	49	253	22	22	1	253	4.43783733046071	2.48465536359742	0.151834480061685	0.0482695995177357	13.9641013010368	88.7751643359308	2.34902294628443	0.860086589844385	0.0520270442528267	0.0827411215331493	0.091884235848728	0.174170919388189	0.344493047014741	2.34902293129558	0.954371532651782	0.0154661868722033	1.07162563668937	2.34902294628817	0.287783219234323	2.34902294628817	0.0662025675376703	16.1592132922115	11.318496798486	15.8323809181112	153.173567740458	0.0276310084437334	6.62517718305858	24.2347122817172	6.70604719466917	8.44333057436536	3.30915122210792
Male	Non-Hispanic White	147	12901801	2015001138644	W	N	24	40	24	M	NA	1	29	254	288	288	24	254	5.17645291720252	4.43927322575413	-0.0457190600259116	0.0143002375026352	80.927538326553	179.603771430732	2.86500930078102	4.05362432368531	0.150940332093588	0.924361768092476	0.63295920621376	0.774150383241291	7.53644953760779	7.7306309662157	2.86500930078102	0.19272586841483	26.4652486983249	2.86500930078102	2.06708157946342	7.78790269386947	0.254092716446709	27.2468675771809	36.701854364922	94.3130612328071	270.252270226176	0.387058823685619	29.4588004593554	146.926482882209	31.3264242967474	53.064922137795	19.3568816938794
Male	Non-Hispanic White	235	14202003	2018HU1183969	W	N	60	74	512860	FMM	NA	1	42	255	727	727	60	255	5.17866681318821	4.54277026419781	0.247569913394089	0.0289693986907064	120.342299454584	182.661773749619	4.27516265004388	5.67867126896808	0.233035999441091	1.25689493406986	0.604989026662105	0.920189615721126	5.1631996536468	11.5984175408616	4.27516265004388	0.556170967708038	37.655587516096	4.27516265004388	2.92306818975539	11.6210969445934	0.849630715999029	27.1491745006119	59.0276168954885	141.060631531428	273.696040625487	0.585023483096925	46.2317187548588	219.288224198096	49.3389872345745	74.5269468449321	29.2523772586744
Male	Non-Hispanic White	152	12600300	2017000177862	W	N	62	7	6255	MF	15	3	26	256	753	753	62	256	5.17963607571971	4.51679550292078	0.151238951876051	-0.0390454987363423	106.488229167972	170.816618901876	3.76306164204099	5.05088705654265	0.217334383934944	0.916662601914699	1.1879091806489	1.36005841395511	6.6958063513221	10.2290190252737	3.76306164204099	0.39955904271314	33.2547524199494	3.76306164204099	2.69424507558732	10.2290620747543	0.366763759200896	27.2982951908849	46.2250975532189	118.672201850706	260.273740089536	0.462890311983675	37.9407331690043	184.320231154966	41.7557949118114	67.8000080837732	24.485653194037
Male	Non-Hispanic Black	183	13902400	2014000496504	B	N	31	28	31	M	NA	1	39	257	375	375	31	257	5.1827039565078	4.53567144588295	-0.221903714786484	-0.00646130514458799	74.7214897206318	177.016447389844	2.6332317598894	3.81587913613072	0.162435242345279	1.15744436362118	0.9826677198122	0.808015659671494	6.62982749713354	7.15785680281662	2.6332317598894	0.440836210254947	24.2640127324366	2.6332317598894	1.88051993149269	7.157866043003	0.483528348060957	27.3763437988346	33.2774350899974	83.7532242202618	267.327093911926	0.348960576167449	26.3440968521084	138.167347518152	25.6052113511786	47.7682500557587	17.5983548491955
Female	Mexican American	214	13603309	2014000155212	W	M	37	92	39376	MFM	NA	1	36	258	450	450	37	258	5.06213742691918	4.29455977747647	-0.0423556357431563	0.0171415591811862	70.260105031446	160.658177379624	2.87889691610811	3.49718255797959	0.266744988638854	0.548343215429559	0.723437803804205	0.992574168400442	5.63451393027688	7.82552950155048	2.87889691610811	0.421735991320219	19.1403226360196	2.87911515866432	1.97151035303515	7.82565317288269	0.389985619197961	23.4052173727806	62.1303065979968	74.6203285477129	238.996940401201	0.138828542385455	34.4784372888354	119.542306398117	32.6585833110322	47.4595054150541	17.2011888670072
Female	Non-Hispanic White	189	14100704	2014000859155	W	N	58	14	205861	MFM	5	3	41	259	697	697	58	259	5.08830479318211	4.30337440037633	0.0824399550188655	0.00496695750131336	80.3035922560792	162.922031283455	3.34298824891249	3.91064056301082	0.272066296668107	0.809741467093448	1.07222359982586	0.878822812166085	7.22993861375826	9.08718308519638	3.34298824892939	0.530652080805885	19.0135986160752	3.34298824891249	1.91254409690895	9.08718420977095	0.50970745202839	23.0215000104182	74.6002898648187	96.8458263619491	241.518318596667	0.176648593430107	38.3815567386908	136.584986086614	39.9364146305535	52.2663306832746	20.184822524144
Female	Non-Hispanic White	94	10800821	2015000521555	W	N	4	69	4643047	FFMF	30	1	08	260	53	53	4	260	4.65482815734197	2.86763819235893	-0.119472478679401	-0.0555364249486291	15.6139651180729	99.4138790707091	2.36203055104722	1.18283797737349	0.0550733841208966	0.19687643849745	0.0945902670609548	0.128259447387894	0.491834891148942	2.37356927767324	0.87318983509282	0.0432743989384278	1.97767860301055	2.37356927768813	0.375920559602029	2.37356927768813	0.0708968487305551	17.8815752502454	12.5128723197612	16.9713060887423	166.744101340584	0.0306479579586331	7.63964918044208	23.6633265693235	7.40208702734884	9.96030438992808	3.63997095549587
Female	Non-Hispanic White	91	10900100	2017001115443	W	N	51	35	5160	FM	NA	1	09	261	621	621	51	261	5.0987906572773	4.28504544470432	-0.0424314456000734	-0.00270972448192972	69.5895212396696	163.380352391704	3.13179142369577	3.68209331447037	0.265965233756972	0.64006941584191	0.646349620329074	0.815256058800523	2.96238924887134	8.51306932406361	3.13179142369577	0.265593981926148	18.0493861383374	3.13179142369577	2.06093430216235	8.51309171755608	0.404983496287841	21.2203562833529	61.3922505821213	91.2800216617512	242.027706724975	0.145451589337235	36.6380535457569	130.940289444485	39.3015334784996	52.2341872641208	18.9495074054508
Female	Other	214	13401402	2014001174677	N	N	75	9	3675425	MFFF	NA	2	34	262	911	911	75	262	5.00620574706061	4.25247699025912	0.0931781309945987	-0.00556789551994523	77.1425586584894	148.507854862473	3.37987797659053	3.73110610022647	0.280760741451124	0.782202838258967	1.00092351461147	0.832988081730922	6.05596364690216	9.18684459307212	3.37987797659101	0.276874884249775	17.8006052929048	3.38036713497283	1.65331461769887	9.18746088617496	0.579087948282278	21.8240661919716	60.9163239228687	97.0726599137491	225.30834793037	0.156889519051967	38.5104647827504	130.088038064033	41.2174838929886	50.1855401584395	19.0378680777964
Female	Non-Hispanic White	218	14700400	2017001231695	W	N	46	7	46	F	NA	2	47	263	553	553	46	263	5.09930222568128	4.31477274352138	0.0873440353341966	-0.0457696266379234	81.6234647509525	156.574603964687	3.35945437983756	4.11445219985457	0.284042604007664	0.633427602134395	0.412278067897614	0.880191056078251	5.83046433990049	9.13194363761957	3.35945437984941	0.3506401822613	22.3287294212939	3.35945437983744	1.68103236808606	9.13194379424706	0.518617568920332	23.2966433004225	65.5638688454877	92.1780615636364	234.426231339888	0.156216463007186	39.0637587837333	142.771726020467	37.7798530488704	55.8282695441997	19.6886057405893
Female	Non-Hispanic White	200	13704900	2014000685996	W	N	68	49	2468	MF	25	1	37	264	824	824	68	264	5.07133230677837	4.25049882612869	-0.0421867882359285	0.0879161877931742	67.2429404259428	174.033619239556	3.04202998106318	3.24845208779441	0.300047231942779	0.678738683899373	1.13545289567978	0.881230819984439	3.08819577778407	8.23070025598657	3.04202997235736	0.456622050760763	16.5727153054812	3.04202997235736	2.12776597303019	8.26909479398807	0.471717761833372	21.1046278429118	68.3143596909756	97.5963702356461	253.769882390398	0.158422310287466	37.5448260343069	128.973479929176	37.9471949446881	49.9007370760626	19.2993897078298
Female	Non-Hispanic White	203	13604105	2018HU0725676	W	N	7	24	3612368715	FMMMFM	18	3	36	265	89	89	7	265	4.82005300007061	3.23606477475985	0.476031515317887	0.032560883516746	40.9395377836469	128.074725120875	2.23867500899346	2.9317456253972	0.167183203263082	0.467805855908911	0.308245346117169	0.579609499006518	1.37243884135392	5.89870268664276	2.17276496492757	0.132075736527718	5.17924477490651	5.90618748741306	1.08254290978195	5.90618748742136	0.242619739203765	17.8421383269327	35.7534351022189	48.9614259013039	201.633546429924	0.0900418707647788	22.8878468141456	75.884942834225	23.2208362138315	29.4414016778018	10.9525575724059
Female	Non-Hispanic White	75	11304000	2016000259903	W	N	59	25	59	F	NA	4	13	266	710	710	59	266	5.08857760439564	4.31762950041791	0.253275223146401	-0.0487362571992624	96.6314950277408	154.445509868889	3.98625044850476	5.02608412128334	0.373938952614241	1.24135025025863	1.31023014505762	1.0294196156771	6.72836450849914	10.8357466307573	3.98625044850476	0.257300716870503	22.2494973039732	3.98625044850476	2.12989221536675	10.8357521576332	0.564641617211945	23.241200164427	79.1155787758213	115.588800708833	232.03135676498	0.177596628613969	45.9398257477189	160.823225607251	41.5562004004437	63.3253150754025	23.1233774992892
Male	Non-Hispanic White	155	12601600	2016000445363	W	N	7	22	36377311	FMMFM	NA	3	26	267	88	88	7	267	4.82729546548537	3.23625654582951	-0.218277154601897	-0.0184970976963509	20.4499286038331	122.584227824187	2.31987306622653	1.53018180359207	0.0395239990096554	0.266489617663291	0.116557545049086	0.207360738301434	0.774168433664503	2.73197915368845	1.00503957041781	0.0610652126137583	2.87363420657129	2.73198080087687	0.503089316308069	2.73198080087687	0.0967973010948888	18.8606623423223	10.8281837725151	24.5678749113309	202.935819055509	0.0988858183764232	7.84493714400605	38.9884599201486	8.31114441158895	13.800223310879	5.09896320964043
Male	Non-Hispanic Black	119	11703414	2016000779770	B	N	16	11	1694138114	MFMFFF	NA	2	17	268	203	203	16	268	5.16842567776099	4.32339578701348	-0.405675844494724	0.0185155487222225	50.2856597748215	178.920437982127	2.11356690675682	3.20748333152796	0.122517901994887	0.659217547685275	0.531504095556862	0.531665672183478	2.62961067298255	5.47540814529019	2.11356690675682	0.181902089171441	16.2998684668671	2.11356690675682	1.20877001510845	5.74527051349223	0.242914695812388	22.7918466711482	25.4325186530243	70.6669189678302	269.48073694581	0.248161814451634	21.1980262454386	102.411560365731	23.3278748904608	36.1052867949179	14.2391391904276
Female	Non-Hispanic Black	191	13701803	2018HU0805321	B	N	26	33	5348026	MFFF	140	2	37	269	312	312	26	269	5.11190687130636	4.40703707900715	-0.205403008683587	0.0200206078716347	66.7953902764294	169.34320918663	2.78280632931958	4.08437279000242	0.277052260513791	0.310036571087321	0.769040840945048	0.775242482511229	3.86541742736435	7.55907533446069	2.78280632931958	0.250940085028502	18.02816683534	4.24993859925163	1.42087353130577	7.56445187699714	0.556066816623652	23.0028885850498	55.4593373948415	78.8406711026542	248.622857561621	0.149537868387493	33.8167050651529	116.884022018028	34.0445229892184	42.4293573862518	17.2967315409
Female	Mexican American	130	11701104	2017001055834	O	M	0	30	33032	MFF	15	2	17	270	5	5	0	270	4.14861093534231	1.92773000926844	0.193891918598284	0.0653785569884549	8.34466095582079	67.6257949476461	1.4669849983519	0.214603000402952	0.0249020345730123	0.0798218317833833	0.039671040702988	0.0855933205159128	0.11701030945929	1.46698499835254	1.19870621351961	0.00604002268746806	0.31599132957665	1.46698499835254	0.139623567220928	1.46698499835254	0.0430988022917524	15.4624214060355	5.93036120418156	7.62757740222001	124.896279624416	0.0133393076837043	3.41358768021665	12.0088454423411	3.38258169327155	4.57735778505703	1.68508068810996
Male	Non-Hispanic White	151	12400902	2014000718424	W	N	19	12	195046	MMF	NA	1	24	271	233	233	19	271	5.18656720225795	4.33671414657951	0.148501843781046	-0.0350548650863056	88.6961062481601	172.69246215819	3.14855269270053	4.27874847292631	0.191242962626981	1.09730260588715	0.850692151212178	0.995750043613933	6.78367304561626	8.53122488843474	3.14855269270053	0.428541926859144	28.1903713707682	3.14855269270053	2.54054042287751	8.55865357051318	0.529728900516702	27.1704373103837	41.396270462496	98.6259452864528	262.414481397763	0.384599653023626	32.9735934115527	156.728366559702	32.3530718027977	57.0228538882311	20.6556455502135
Female	Non-Hispanic White	119	11800200	2017001134561	W	N	39	59	853940	MMFM	NA	3	18	272	470	470	39	272	5.10537309493864	4.31877556252337	-0.0617395951929222	-0.0219067560526882	70.6004110930835	161.332320298286	2.88543733026947	3.71887303123042	0.297399127516718	0.679553443614402	1.12117153496893	0.928734404271488	5.59877857773647	7.84342843822882	2.88543733026947	0.336377168655257	19.055893297954	2.88543733026947	1.58677185118522	7.84343186202876	0.473735134698411	23.4678372849949	53.7494170916569	77.3196093293901	239.748693607391	0.133724149282743	36.6236934947269	114.516544026911	34.7927124048195	47.5703753809229	17.2944957604526
Female	Non-Hispanic White	151	12500504	2017000142629	W	N	36	15	3636	MF	NA	2	25	273	439	439	36	273	5.10652622869994	4.29897805514774	-0.293847720584055	-0.0193297316105034	54.8789765604387	161.935239168631	2.22223368861305	2.67603454153771	0.202344671567494	0.279895083639592	0.712440675002512	0.644163554686575	2.70109898331243	6.03870800528186	2.22223368861305	0.298553329926729	14.9052282216917	6.04064074292149	1.63109926805021	6.04065745434637	0.30957716870184	23.6954120269367	45.368263075587	63.8410183397387	240.420358117073	0.103029844471955	27.5973694028347	83.3898533225763	26.6965379690424	33.9502811716381	13.3567554809043
Male	Other	44	10607104	2015000330633	A	N	26	22	252726	FMM	30	1	06	274	313	313	26	274	5.15129787832525	4.3118660909785	0.0827666785482916	-0.0456554212349133	81.0148741687201	164.950009800627	2.96061617510016	4.04609706634698	0.162797851637878	0.830437263128571	0.786157856744137	0.9136436412995	4.85357576386568	8.04538301838372	2.96061617510016	0.484219854498638	27.1914589161486	2.96061617510016	2.00961122562152	8.04778908093504	0.528102425991252	26.364193592565	36.9331996552812	92.6741953338975	253.540312419591	0.387959473211546	29.0061746824996	120.917151199148	30.1681917878805	46.5265196792636	18.7658887497347
Male	Non-Hispanic Black	190	13603709	2016001412658	B	N	8	36	33113513983183232	FFMMMFFMMF	25	1	36	275	103	103	8	275	4.89396797717093	3.47080229893582	0.0543095435498181	0.0249880586437593	33.957571303053	136.859661995953	1.98232613337233	2.39349702675611	0.0810437869709321	0.428508235131087	0.381113919860688	0.441015301604506	1.64944820858401	4.69655703146144	1.72797317456211	0.143449151615239	5.01668212904078	4.69711808047257	0.835616298572294	4.69711808047287	0.300276266126385	18.6516773503667	21.2201182107864	49.1189460173927	220.414092937701	0.189944863058411	14.859151954411	70.556396631709	16.3041886480557	25.0928665119749	9.52174099728657
Female	Other Hispanic	58	10602902	2014000650562	O	O	37	120	3735127	FMMM	NA	0	06	276	445	445	37	276	5.06750496375624	4.26386788927231	-0.259779550151929	0.000984901370273818	54.821822699132	158.934134048394	2.39817577410026	3.04708941766524	0.213130141299951	0.870513876644501	0.439439838901101	0.682929663117951	3.0537862142221	6.51871681912684	2.39817577410319	0.213284821110411	15.8543553888734	2.39817577918717	1.31376068714224	6.51891762818726	0.323993848163538	21.8598017256262	45.9595549916095	72.1231608681421	237.070818669418	0.123630569338503	30.1509387486851	102.96144415246	30.0642318477393	39.932605526448	14.2134373519778
Female	Non-Hispanic White	274	14804905	2014001098874	W	N	36	10	236742	MFMM	NA	0	48	277	440	440	36	277	5.10693713565306	4.30032949312305	-0.00405937900803366	-0.0138505567214624	73.4254139001185	162.89186551852	3.04501438014092	4.10052577372918	0.28933842268041	1.16621880301705	1.01852078852117	0.779902816707387	4.01433870654742	8.2770736216899	3.04501438014092	0.348280073818091	20.0124647068614	3.04501438014092	2.06787718475371	8.27720725693316	0.385280488193932	23.1133225442175	62.1610565561537	90.6674217485353	241.484779148064	0.158445302252166	40.2234292511242	126.29803003745	38.3579629427079	48.0478960045817	18.3831156272752
Male	Non-Hispanic White	152	12800400	2018HU0031899	W	N	27	37	262627	MMM	30	2	28	278	328	328	27	278	5.18121379303633	4.422591413835	-0.0441815709674733	0.0366538546168804	79.7111792725552	184.540259371668	2.92229709464718	3.86758147521778	0.169957083908208	0.793211413262548	0.746850981393523	0.694199548551799	4.43030243367841	7.91818971707128	2.92229709464718	0.507520609828587	27.28786724369	2.92229709464718	2.23570473357954	7.94362708937268	0.47881042725503	26.2768909836592	36.4505236103635	97.5596970697743	275.804347001558	0.417748383549386	33.8914343102981	148.575566944645	33.2964141866785	53.0191087745086	20.1495560483429
Female	Non-Hispanic White	152	12701900	2015000325624	W	N	58	13	5958	MF	5	3	27	279	698	698	58	279	5.08828141155831	4.3059390429405	0.256390391113602	0.0100679947417804	95.8063947750248	163.751397085709	3.91747077098831	4.88975119945209	0.349719689710582	0.835292395669703	1.42370569609015	0.767650053077484	7.19766169688499	10.6406783682811	3.91747077098831	0.353456030128219	22.1967787561746	3.91747077098831	2.634132480113	10.6487896045729	0.558914414285037	23.4561862425471	79.7463969364462	108.100561588898	242.439832291622	0.195479081482474	45.297428673077	171.282241156378	45.8934064073015	59.9428260884099	23.7437739181434
Female	Mexican American	155	12504901	2017000451732	W	M	18	35	43165218	FFMF	NA	2	25	280	220	220	18	280	5.06948672121478	4.10479388010369	-0.340584779604428	0.0486147545250202	43.1295812028116	167.017980742864	1.76710467637472	2.4822810078166	0.168797259045763	0.61519674249424	0.411914109392169	0.590524884290572	2.37370658809051	4.8032188241469	1.76710467637472	0.0756400794274675	11.6729520088055	4.80348273297685	1.17887009237927	4.80348852911031	0.266113529959381	23.4069192795751	37.6401906719148	51.0692772788151	246.058082899508	0.0823153039877501	22.5082899614705	70.6145763579385	21.602051612634	29.6758020704125	10.870259723788
Male	Non-Hispanic White	167	12504301	2015000131152	W	N	48	129	8483912	MMFM	11	2	25	281	579	579	48	281	5.18632060786862	4.45412296105379	-0.138565710874803	0.00586103646298354	74.855324967009	179.860516890547	2.68769957670624	3.67951285993172	0.173610879549674	0.783539587425383	0.846873887233508	1.00048025671518	6.50179024728349	7.25588952482911	2.68769957670624	0.606954716792467	24.6530972629416	2.68769957670624	1.39025220527796	7.30592490709758	0.450734939388575	26.8510759222368	35.838765119576	93.5911251534299	270.541964806513	0.387722871198121	28.0034346092689	141.366851631336	30.5018563628857	41.8996426431315	18.1783881072934
Female	Non-Hispanic White	75	11211701	2016001447246	W	N	69	52	69	F	NA	2	12	282	839	839	69	282	5.08348274106457	4.30772604657956	-0.399872609089508	-0.0106801706054267	49.7919556320676	159.621050304856	2.20787972982815	2.60266122652769	0.208753002670466	0.633815980752943	0.517464376694307	0.536918795755687	3.64965409130142	6.0016291134531	2.20787972990246	0.223743433452211	12.0230479230585	3.98735081023525	1.30381155782491	6.00163934900407	0.310898252996712	21.5519329515033	44.2342025160962	64.036561280872	237.838872584037	0.098256884838026	25.989703341392	89.0499830084723	26.869775966798	32.6433396969631	13.1279906435869
Female	Non-Hispanic White	154	12401203	2015001034021	W	N	51	28	16135051	FFMF	NA	2	24	283	622	622	51	283	5.09862840594759	4.2853591170153	0.0354315455359168	0.000955002531117053	75.2481006328692	163.953591394916	3.28107033125451	4.0075085872558	0.32650579487529	0.954219790999248	0.906639267116985	0.872599550268931	4.37006767014795	8.91730403851365	3.28107033127313	0.519319596740506	18.684252543075	3.28107033125451	1.66236527165346	8.91887385934521	0.380130745761798	21.9340102575913	71.790453582038	99.4897208558594	242.6643146159	0.149606981807422	39.3546058875351	136.200622370716	39.3684925638371	54.2765520138896	19.904967078511
Female	Non-Hispanic White	225	14702502	2016000184091	W	N	41	74	2041	MF	NA	4	47	284	492	492	41	284	5.0983724468077	4.28595947958791	-0.276678156173096	-0.0461921230835243	55.1072520370023	156.363015087587	2.31574817479003	3.28519879427913	0.199651240038062	0.431214524694328	0.795349202565899	0.829604789056825	4.68748474180951	6.29482401472862	2.31574817479003	0.31251193681421	15.3716936695132	2.3193526511267	1.02912936547356	6.29485618275241	0.311254038627837	22.796737761436	46.4292025128872	64.8413186748208	234.188595261178	0.104204527660577	27.4750417129909	96.4906495781454	28.1841694550872	35.2330029082641	13.5580453008178
Male	Non-Hispanic White	156	13100600	2014000492298	W	N	58	50	5910125812	FMFMM	60	2	31	285	700	700	58	285	5.17326088837625	4.4931562116022	-0.0845739589223616	0.0633392274812845	82.1529088348453	188.029735120473	3.09988283689557	4.17622345747164	0.188803651025723	0.398137752770472	0.858697559148204	0.531653007942196	4.50166287843588	8.42635309004596	3.09988283689557	0.476812535846864	27.4071553381248	3.09988283689557	1.9438893938592	8.42635518588373	0.448407208093723	25.5019399627112	42.8685163597619	97.7018794096772	279.706566763845	0.459909136961176	36.4757160994055	174.67806631218	33.953012372835	51.0424778031705	21.6764396419557
Female	Non-Hispanic White	189	14001006	2015001139729	W	N	72	30	9372	FF	25	6	40	286	867	867	72	286	5.08494127697378	4.33294322116961	-0.179285502128191	-0.0228742928603131	63.6664489055768	157.916590295808	2.80937218899701	3.63156676809026	0.270380091165406	0.67433200833383	1.04976620735934	0.840986066433248	4.30298052175413	7.6366585697826	2.8093721889971	0.378691576727336	15.5140159317041	2.80937218899701	1.69254462956145	7.63666536772547	0.393823117357521	21.6621624414622	56.5690481586357	78.4721269368633	235.931556631677	0.125531652595039	33.0210945078302	106.630840935316	32.5717847588529	45.2257564364503	16.5704888426952
Male	Non-Hispanic White	103	11201500	2014000226224	W	N	55	48	5555	FM	10	1	12	287	661	661	55	287	5.1735706660695	4.48829725343144	0.359746783624063	-0.00984904047773003	127.490778571756	174.813838130057	4.47846015928141	6.22656586291634	0.26308274531929	1.28894006393888	1.48838216549942	1.25090105895251	4.55990674656194	12.173696903681	4.47846015928141	0.642613095694848	39.7097613479907	4.47846015928141	2.3517893450246	12.173716449798	0.612350641312091	27.4675477814706	57.8951257345385	145.171106366593	264.828437353703	0.614318183221299	51.7471821521904	208.55885463553	45.3518113522254	74.260126135529	29.6505901433327
Male	Non-Hispanic White	191	13604015	2015001050326	W	N	54	42	545281	MMFM	15	2	36	288	651	651	54	288	5.17422104918277	4.50699034726765	0.031969447115881	-8.07128316906327e-05	93.5933930934291	176.644693963429	3.37620110954748	4.98037782958856	0.198854850381047	1.26038051064838	1.12441119492634	1.10855329767831	5.94983929988385	9.16356036377536	3.37620110954748	0.587743434886414	29.7032941215944	3.37620110954748	1.7962746974693	9.17746612394253	0.186297402872356	26.721510080889	46.128843395283	109.518416211186	266.90592171591	0.450466407836194	38.1624092264497	171.887753695285	36.3336365335454	57.4162155485067	22.5282017260512
Male	Non-Hispanic White	43	10603724	2016001428437	W	N	62	15	6221	MM	NA	2	06	289	749	749	62	289	5.17248910677982	4.50756710560092	0.333000906768817	0.0276178985184537	126.541208292066	181.291640003295	4.29812055967975	5.78813184849721	0.239882392948816	1.32675907353749	1.22034606939	1.22664540769708	9.32736719357268	11.6834215622347	4.29812055967975	0.725955264736754	38.1291889809437	4.29812055967975	2.24307610262903	11.683503013903	0.191648799934472	28.4410560464814	60.3267541070791	134.265156591781	272.154860646638	0.575274229913482	49.2409006391767	243.266060786337	44.4740226859637	71.5011716673071	29.2438600490523
Male	Non-Hispanic White	83	11209905	2016000667107	W	N	39	16	391711366	MFFMM	3	2	12	290	478	478	39	290	5.19107584481703	4.54822665695132	-0.0606237576576994	0.0597328342332033	88.9080686433241	190.720437735944	3.12949785499639	4.47698902778262	0.182188126301297	1.00645520959845	0.993630265732698	0.963714970068327	6.69854434682683	8.50684286381083	3.12949785499639	0.626974771720696	29.0841782559744	3.12949785499639	1.88224726320789	8.50685608593746	0.384288361152777	27.4096915105336	45.3749240216085	107.680653103093	282.703176296573	0.44291828320465	33.537872222991	159.486818675089	34.3576380166261	61.8483809556349	22.1179745955198
Female	Non-Hispanic Black	58	10603704	2018HU1193392	B	N	7	14	61643941711	MFFMFF	NA	1	06	291	89	89	7	291	4.83349990505703	3.33683206534918	0.276222811204226	0.0635002672614922	37.0791522072234	133.887537117339	1.99128693421282	2.4524196601378	0.155058041050493	0.283056521967653	0.435848151302673	0.34728697614536	1.77226469412439	5.40940235039334	1.99127493177072	0.184961942841969	4.67311798829781	5.41283923352394	0.868290077914502	5.41283923352394	0.227702876960061	17.6208348910994	36.7102028018407	52.123015571583	208.458845871367	0.0845995074253119	20.8121507496082	68.3996389820803	22.1837277657354	27.2623694609771	10.3774579928979
Female	Non-Hispanic Black	130	11703204	2018HU0492565	B	N	0	51	350335	FFMM	90	0	17	292	3	3	0	292	4.09280068866292	1.93180718310997	0.505991776278124	0.0036878577351819	11.4478158848299	60.128777049209	1.91946170083812	0.272302490935783	0.0310946695175644	0.077425652310357	0.0375042161203959	0.0943829987305878	0.225492669036081	1.9198787000201	1.82160775618151	0.015566388896992	0.573143247346405	1.9198787000201	0.192175690969939	1.9198787000201	0.0480081237887625	16.2085187438936	6.50646798189884	10.5523792221372	114.360749397834	0.0166110319780855	3.94519812097811	12.9081173541814	4.21664962652104	5.30665920102178	2.0192789116692
Female	Mexican American	202	13603210	2014000457842	O	M	48	39	47481723	MFFM	NA	1	36	293	587	587	48	293	5.04812295393871	4.27860511982602	-0.0296397908361399	-0.0144223455831739	70.032913821409	153.500006343892	2.91236341209183	4.00632535395666	0.262639734594056	0.459583549158187	0.623607514215609	0.844730662410708	4.96325104508799	7.91662419350866	2.9123634120904	0.281358067005647	19.4508412139671	2.9123634120904	1.6793955998074	7.91662454095432	0.392297793168639	23.0467633711761	56.503985757244	74.4411696385174	230.965180841424	0.138309562840939	32.2551913614896	114.79504594114	35.9875293877628	43.0260307133886	16.8163635537351
Male	Non-Hispanic White	222	14800100	2017000193401	W	N	7	12	73717	MFF	3	3	48	294	89	89	7	294	4.83191587664268	3.24882314196705	0.219096007452874	-0.0190975671392483	32.0699402124313	123.078001080056	1.67742577606511	2.48733518462507	0.0673453919272401	0.582719538889198	0.334703705242763	0.407621845359428	1.32233570582042	4.52315157143641	1.66397481789267	0.0878573373596962	4.73064061070965	4.52315251045582	0.818510388762435	4.52315251045555	0.147950567204243	18.2730922745554	17.0005300957541	41.2424412746301	203.548584945804	0.173112845286594	13.6414677020289	62.7072733340081	13.8073371841268	24.2175740851005	8.4674929891216
Male	Non-Hispanic White	152	12601004	2018HU1163537	W	N	54	38	5454	MM	15	2	26	295	655	655	54	295	5.172763633449	4.50256341685561	-0.377574378023756	0.0150431284914888	61.8671311106242	179.075367003839	2.35526372429661	3.17389724332706	0.138896262860568	0.884126519341782	0.598147791467116	0.820562209442319	2.62961386126074	6.40226475580128	2.35526372429661	0.464606637049615	21.2547008314857	3.25867965582107	1.5487734342261	6.40227055496277	0.376269928023945	25.267602422782	31.4229477179032	76.5747872212609	269.655727587051	0.307766443879906	24.8793293567699	119.127283834728	23.4382585925756	42.9369041165877	15.8777588308647
Male	Mexican American	283	14803306	2014000586398	O	M	22	30	5322	MM	NA	1	48	296	269	269	22	296	5.14411398605445	4.34885538718163	-0.113382167743557	-0.0457391503236672	69.0943677962609	163.755561243458	2.53592484798756	3.47870447125396	0.137201704027529	0.682665684805971	0.666973085803115	0.630812534416497	3.52997527606459	6.85184827738657	2.53592484798756	0.445934258196989	23.0956796431061	4.98773156915858	1.49322467140126	6.89335841883276	0.357231822769418	26.246220585398	30.5273849019982	68.9374363473081	252.162095723235	0.34551691383404	26.6529940374128	116.773451804557	26.4588240709183	44.5164434970353	15.9866031066292
Male	Other	52	10602902	2015001026050	A	N	9	8	58930	FMMF	NA	0	06	297	118	118	9	297	4.92529281153537	3.5282582254424	0.0755442151218816	0.0091518220678829	36.7376619693543	138.995927425348	1.9956727727875	2.8490198940386	0.0972128661108308	0.536547652418342	0.228380568884815	0.549116723205656	1.85654601449921	5.42471722314238	1.9956727727875	0.130412894266412	5.94068837842877	2.80675753950354	1.12098175373531	5.42480103381809	0.339592577676012	17.4086602123641	22.3357621900212	51.1045384682875	222.989451159666	0.221934454403482	18.1173715655456	89.793877532828	16.6704584257016	29.5094938008993	11.1253494074543
Male	Non-Hispanic White	83	11209905	2015001405345	W	N	40	36	8401342	MMMF	NA	2	12	298	486	486	40	298	5.1949049158574	4.57898249489642	0.449261647116736	0.0137452327514849	152.66471965499	182.84707515726	4.84216785435981	6.7351185447196	0.289616467798868	1.27730799440942	1.77525844735971	1.4347500226182	11.0479146729859	13.1621754541738	4.84216785435981	0.655204731003881	44.7927292425781	4.84216785435981	3.33258914378046	13.1623768871526	0.887281322583141	30.5281758598132	65.3202684232843	164.741855629544	273.904252634456	0.603620722579238	54.5482707448469	249.678159605223	53.0027851447036	80.5025891158084	33.1572591819752
Female	Non-Hispanic Black	275	14957001	2014001252524	B	N	4	52	261426	FFFM	NA	2	49	299	56	56	4	299	4.69009638171493	2.9503691377637	0.277819130295593	0.00568701498121218	25.2338984725613	109.484544885425	3.49107195034479	1.76728609657759	0.0897162557491035	0.235404493484291	0.165878872356931	0.235046720061434	0.923257079262172	3.49409417345999	1.28542649211092	0.0495429739773854	2.95198768030415	3.49409421996674	0.61203114563961	3.49409421996674	0.134590348899551	18.6307015012088	20.7106549958911	28.6314530226862	179.258528675554	0.04889969935931	11.2718131686517	38.8424797498354	10.709096382375	14.6202116411576	5.76049714903976
Male	Other	200	13703107	2018HU0882209	O	N	24	91	545424	FMM	NA	2	37	300	294	294	24	300	5.16621241837617	4.39935079926802	-0.363614271906635	-0.13429908143172	56.5845809864283	153.225905190494	2.01844344567075	2.9422217535527	0.0992415315019786	0.907377175661061	0.517572666956598	0.643214668740022	2.97276360896716	5.48669807249077	2.01844344567075	0.376669672269804	19.0377301616988	5.4704463319756	1.15174749152771	5.48669814013907	0.0688688728847848	27.0337708286023	21.7628231128255	56.9902611726899	239.900917327715	0.249892757198191	16.8665433077249	91.2508720461955	21.4199628305209	32.4427689890626	12.1056608547632
Male	Mexican American	120	11802600	2016000290243	W	M	15	28	647102915	MMFFM	20	2	18	301	186	186	15	301	5.13782786026697	4.20221211046259	0.0144172921364331	-0.0599393357230057	67.8045568319763	160.43494359522	2.86794556110793	4.05768387859661	0.146221718174626	0.931676195455256	0.479075450951876	0.882069085174917	3.92104167810566	6.78994279366936	2.86794556110793	0.358544643354812	19.7580626797138	2.86794556110793	1.61016113489427	7.7958843033458	0.46280147001688	22.6422049816671	35.0093793472222	85.1334014559366	248.317305080894	0.385303097080103	30.1152013980464	128.682629293861	28.4918974543845	47.7573143572278	17.8040128213258
Female	Non-Hispanic White	224	14700200	2018HU1177432	W	N	37	13	3734	FM	NA	2	47	302	454	454	37	302	5.11107927629658	4.33539083375439	0.0178067337534773	-0.0577210567222404	77.7266020502486	156.547302948824	3.13757811303271	4.46675053094789	0.284035378178337	0.806137735740701	0.943676795618293	0.899273719408325	5.70932162870646	8.52882071602322	3.13757811303271	0.46119546906075	20.6306148269213	3.13757811303271	1.92327976966105	8.52882157002728	0.532317044340873	23.7728022220043	62.6417075738026	85.8869261021812	234.395574003378	0.142745550870548	34.5949793994914	118.808915669553	39.0960345463224	43.6582872119411	18.3858605696184
Female	Other	49	10603729	2015001154568	A	N	54	18	54	F	NA	1	06	303	657	657	54	303	5.06830254077582	4.1613944765365	-0.0484204846928035	-0.0211870044668606	61.1282424034685	155.573071792635	2.78267516627441	3.54892423758764	0.249296923372205	0.564182010349715	0.639260472583362	0.917563418269211	2.63410575781579	7.56393825715847	2.78267510494798	0.059472158660353	15.7951327486605	2.78267510494808	2.10402710102951	7.56409517227484	0.362841862356635	20.9674378423748	58.3658520363555	75.0993797728572	233.300696123915	0.125343501147546	35.7102621489635	109.831372645936	31.6898387134385	45.1380417602241	16.2300009767763
Female	Non-Hispanic White	48	10607901	2018HU1371935	W	N	3	18	633940	MFFM	NA	4	06	304	42	42	3	304	4.60123528663073	2.76087326239129	-0.557784370172069	-0.000443166222276626	9.05293389275413	99.5631504178698	1.38326912210641	0.671808351320405	0.0316346700946744	0.0729881731340572	0.0357246075394653	0.102484209593049	0.250385811995424	1.38327017564459	0.664946904316723	0.0146352640110118	1.15219475803007	1.3832701769541	0.246446313469734	1.3832701769541	0.0600843198838521	17.7900356017949	7.14940253400508	10.0451401882341	166.931842590974	0.0161793538130064	4.50553890041985	13.8002991023965	4.15203917052619	5.46677011161894	2.12369296132727
Female	Non-Hispanic White	45	10607504	2017001018204	W	N	61	25	6161	FM	8	2	06	305	743	743	61	305	5.09951328260822	4.36824536021773	0.105808177827897	0.00695675247020685	87.711545471037	165.08657529938	3.76834288672172	4.49561582558326	0.351011970527017	0.952899562017123	0.760688461552948	1.04346668258978	4.64701625795147	10.2434178496068	3.76834288672172	0.426723899935595	21.1161042212439	3.76834288672172	2.27702520347169	10.2434179899299	0.546008612160556	22.2758929077555	76.0420267253525	115.405485848398	243.920910856181	0.180895581383032	43.4268987986031	167.040512956985	44.6927421509817	62.0651011324087	22.9794407336892
Female	Other Hispanic	263	14805700	2015000314149	O	O	38	13	384202	FMMM	50	2	48	306	463	463	38	306	5.077666309071	4.26092939290529	0.0467817837040486	-0.010339316120561	74.2703026455287	158.749421385505	3.02842313152044	3.5129973626788	0.249616922340301	1.05385305794512	1.03071257937842	0.851786830993087	5.28779440177773	8.23210751221209	3.02842313154935	0.464606280071221	20.1899436935014	3.02906766044103	2.00360570252994	8.23210756669333	0.475504262089113	23.524414000312	61.1303796797863	93.3779605656014	236.864146513414	0.14580889858551	35.9922030631222	126.165456026335	36.0220397768393	48.299251658758	17.9331215082268
Female	Non-Hispanic White	187	13601500	2018HU0013502	W	N	67	21	6967	MF	NA	0	36	307	806	806	67	307	5.08703959015503	4.29823700316308	-0.295140401501564	0.000624525565970856	54.767480794903	162.010980811294	2.53016830832682	3.03344481172101	0.217840425356194	0.861291752008371	0.713054316837037	0.586815413924101	2.99042737541935	6.87757309386783	2.53016830832682	0.303413596172063	13.8267243074584	2.53016830832682	1.43323834996891	6.87771053517615	0.412439204680656	20.6457856240877	52.6377486367946	72.6503049695173	240.504691683835	0.127008840918709	30.9990538722525	93.8724650011234	27.2653572079888	38.5440584786189	15.2129337225588
Male	Non-Hispanic White	84	11303400	2015001412966	W	N	5	36	45323401	MMFMMF	20	2	13	308	64	64	5	308	4.72708425522964	3.00612933629997	-0.160547419999592	-0.00311036516588186	17.2115714493243	112.614883816337	2.52945567922402	1.39532259258739	0.037933443932797	0.234742166447116	0.0384571173313367	0.106398239382846	0.466694206587306	2.52957501219024	0.931077368817887	0.0144420627202618	2.60532810358305	2.5295759191978	0.350018674068067	2.5295759191978	0.160188797287037	18.495551588252	8.67782557477447	20.593688586409	190.427474057855	0.0881431088176432	6.52527290158726	31.6177223490916	6.73558079994322	11.9322031561629	4.43019509315819
Male	Non-Hispanic White	192	13904400	2018HU0583210	W	N	81	47	8177830	MMFF	75	2	39	309	974	974	81	309	5.12703279854665	4.31721667499772	0.0365625086278887	0.0450201491135698	77.7718222438999	176.276352396703	2.91469566169938	4.17658898666865	0.163701291494084	0.95241713711703	0.714547150833588	0.879682859155408	4.76521655323208	7.92130030202503	2.91469566169938	0.3463717868918	25.1570802882595	2.91469566169938	2.10888790084475	7.92296366082654	0.350265613606582	25.6826561914721	39.2607013212484	91.7175427836289	266.488396325967	0.355327043973863	29.5235712788704	143.977267053596	31.6646174022981	48.7362293604303	19.418314316613
Female	Non-Hispanic White	214	13603210	2017001060837	W	N	13	16	4713131547	FFFFM	30	2	36	310	158	158	13	310	5.06784264756041	3.99921294467994	-0.435444554293688	-0.00878887652757708	35.2959557852637	157.4414701389	1.63372078551963	2.2539350213203	0.144152070192695	0.37294045816347	0.266169430371024	0.490920330648249	1.75306752322012	4.42207799340153	1.63372044017038	0.0306813350460813	7.91568336008293	4.44091258529726	0.936124147932758	4.44091258529726	0.217022183180033	20.6046484269699	29.205085849432	44.9334856284137	235.398974612575	0.0698382439690665	18.5549309861672	66.9202127807058	18.1508769797586	24.6396409656279	9.61440291049283
Female	Other	58	10603737	2018HU0914737	A	N	43	12	9454318	FMFM	NA	1	06	311	527	527	43	311	5.07100227764035	4.23201269393977	-0.0584060677816943	0.0476763912585905	64.9492779575564	167.114410205339	2.70294423481615	3.71263109194687	0.233234171019791	0.517777267246813	0.917662101895045	0.928510031911637	4.88149811080744	7.33444481366845	2.70294423481971	0.321838261675531	17.5449747693036	2.70294423481615	1.71952350197183	7.34736419683888	0.42699170869251	23.0290854398534	53.8936562543405	84.4831700581508	246.164623239878	0.1377481728249	33.5865867947566	110.918422433075	34.8258842579025	47.0469430143617	16.634231230048
Female	Non-Hispanic Black	176	12600200	2014001469371	B	N	73	65	7387	FF	10	2	26	312	879	879	73	312	5.0691894684069	4.32841408725347	0.131775241701537	0.00292491207873046	86.5038852362379	159.511238488504	3.73968705356979	4.7474766011572	0.34024372001833	0.785812022794911	1.31368169962366	0.854686485857105	4.47628499003515	10.1365997393784	3.73968705356979	0.660881922978646	19.9382091148052	3.73968705360796	2.38140559355462	10.1655233618363	0.539951163913016	22.1313166040629	72.3287789962581	112.24692629855	237.716145513521	0.182228423788486	46.6014061177745	161.98099360299	43.4673345825802	56.3552114764491	22.2245997950357
Female	Non-Hispanic White	188	13700300	2016000377198	W	N	50	41	5050	MF	30	2	37	313	610	610	50	313	5.09482907162305	4.29583349276617	-0.254588960158855	-0.0179983442001827	56.897109068372	160.265325700239	2.59061035887938	3.37140139891829	0.246893058726717	0.325720750079838	0.776905219842997	0.867108532701847	3.04887729859916	7.04199202277689	2.59061035887938	0.228159788435047	14.9255236984387	2.60437424571163	1.41671862725684	7.0420090629471	0.301877000489243	20.9628200255043	50.5189901326167	73.1537650965836	238.558498306839	0.120960642547324	31.8600019969451	107.833482782199	31.3409109196049	38.6786252733862	15.4503029228101
Female	Mexican American	229	14203207	2016000380921	W	M	72	33	72	F	NA	2	42	314	866	866	72	314	5.01851567091255	4.27538817094168	-0.277379543912048	-0.0302744865034397	54.4895329374047	146.678216558936	2.52386113406354	3.01422070479742	0.225996840125312	0.567916877818771	0.841694358971551	0.611108568540741	3.59137403921874	6.85402395440685	2.52158975774921	0.310314290743362	13.4341008645896	2.52390111925781	1.30306559326555	6.85439161726382	0.332571795348102	20.6091982329633	46.467854975198	64.1972666102302	223.223251599096	0.107049170779168	27.8106126975826	92.3323630647343	28.9656762261404	37.8240612796856	14.0719366230918
Female	Non-Hispanic White	192	14201400	2017000289535	W	N	14	14	9404714	MFMF	20	2	42	315	172	172	14	315	5.08655179548988	4.07286822130421	-0.311845745861455	-0.00749688499246537	42.9923621476302	160.622181834672	2.03079051271152	2.70187369897812	0.190309402465368	0.563352331380114	0.227202013748264	0.457254549706956	1.19737400418279	5.51903455140423	2.030790512711	0.147930950242297	11.5877768858366	3.1467167892552	1.24981801668601	5.52026094810758	0.287587852586254	20.1702595016743	38.5415094302939	59.3787515165047	238.956778738371	0.104230482422856	25.0419015201506	81.6871879365412	25.8766608649858	30.1864107584261	12.1317789802466
Female	Non-Hispanic Black	46	10603747	2017000938257	B	N	29	20	290334426	FFFMMM	NA	1	06	316	352	352	29	316	5.0947398757249	4.43661385573896	-0.0873191446551807	0.00906611097404564	77.423837489735	164.647361978511	3.10418757987467	4.24858661584255	0.29412625053108	0.895864039472104	0.872407644482625	0.800250813568794	6.1759255125847	8.43634756909294	3.10418757987467	0.533606290710734	20.573899165532	3.10418757987467	1.98581445014632	8.43805669039389	0.456310735950656	23.9417393432329	67.6823989750664	87.9139059395604	243.434034585914	0.151403494533897	38.1268455529531	116.942849956468	39.2393159766131	50.08180986153	18.8916226670094
Male	Non-Hispanic Black	54	10607702	2014001041561	B	N	9	25	91444	MMF	20	2	06	317	118	118	9	317	4.94394060915818	3.62143193176822	0.0994050653058456	0.0471864061641417	41.298946743953	147.102116448092	2.04884457997772	3.18433412797794	0.103022460165815	0.444830888233513	0.308350506572846	0.516478243067582	2.02851151886389	5.55783410029392	2.04884457997907	0.148280512553723	6.24129678470521	5.54120070381674	1.15277654534994	5.5693369910902	0.379248831155667	19.1571886650387	24.7056227777589	54.2156905651881	232.673516083162	0.251742242637847	18.6728989838489	85.0790702439868	19.9362611292884	34.3261242621087	11.9177968082836
Female	Non-Hispanic White	181	13401402	2014000715583	W	N	62	13	62	F	NA	4	34	318	751	751	62	318	5.08983494007231	4.36183646073486	-0.246254673878574	-0.0525219928340398	61.2878603641398	154.055503102522	2.85588179234215	3.28716356207833	0.232555470113677	0.707825566182526	0.662501678512699	0.812662459244561	2.66001362054337	7.76309012398177	2.85588179234449	0.142519985071072	15.5957955078962	2.87270622006442	1.69686966636216	7.76309156396761	0.296967991333084	20.4602230836332	58.9597353002129	75.722864226425	231.59177263385	0.132980168275964	33.4134051454152	113.889089178776	31.8944463142423	43.4993942560619	16.534968168029
Male	Non-Hispanic White	188	13701302	2014001073055	W	N	25	26	482562	FMM	NA	3	37	319	303	303	25	319	5.18375506744837	4.43470319013634	0.405283795124378	0.0248464696118603	126.467705775185	182.838186893809	4.24918509896559	5.79186875768822	0.240565302871471	1.30572257230478	0.889964690046382	1.64474780845699	7.59731391810618	11.5504673966323	4.24918509896559	0.618336362835439	39.3583092166317	4.24918509896559	2.92395627694291	11.550482640277	0.742149965156486	28.7628140054366	60.0229125566025	138.309195506474	273.894266634069	0.61004369660665	48.9670508437161	235.934408542428	44.5821558160348	71.3092193570459	29.0956859118398
Male	Non-Hispanic White	39	10800800	2015001426811	W	N	93	56	93	M	NA	2	08	320	1119	1119	93	320	4.96173218514358	3.71067190219009	0.00556102656325414	0.0200867515825082	41.1092406166622	145.739231148319	1.55354892089676	2.05953278040955	0.0762857766541027	0.426811183390366	0.452802614770967	0.412102600138813	2.89900079696799	4.22205916446033	1.55326292344729	0.155238813052448	13.3353580270551	4.22220637962593	0.747232989682025	4.22220637939079	0.217215499434533	25.4663758707708	18.4420091153441	43.677454819502	231.054865074757	0.180805274264249	13.8946409802754	62.5347018879269	14.1208674615019	21.4114362521488	8.97222388006837
Female	Non-Hispanic White	248	14600100	2018HU0198774	W	N	55	43	5565	FM	NA	2	46	321	670	670	55	321	5.09867965360437	4.33187796915592	0.608663062691904	-0.00407640394958159	139.845890176539	163.139106286021	5.37254561264552	6.78755731354175	0.537748654687318	1.70391326899814	1.2546406633297	1.40572218677586	6.96291405798133	14.6040724646722	5.37254561264552	0.69338278034312	30.9848159809414	5.37254561264552	2.75297110775237	14.60409309089	0.751440241463657	25.0297259919729	106.279373379425	149.030897358587	241.75962510846	0.253801630505074	64.0691757615195	219.692735135341	62.7375898396768	84.1993961410322	32.4716153297821
Male	Non-Hispanic White	47	10607107	2015001047529	W	N	6	13	925630	MFMM	NA	4	06	322	77	77	6	322	4.78474641967945	3.12947765287367	-0.245873215368359	-0.0141556899443779	17.8785994744017	117.98892094193	1.05835535868963	1.51367325711281	0.0453538168714589	0.190108908392994	0.0798665564738889	0.249999051062678	0.486250587374317	2.87689164733102	1.05839146013641	0.0404998418278067	3.01940519266618	2.87690797933602	0.53902924765345	2.87690797933602	0.0776287963710684	16.8928142361995	10.2292536990557	26.2861052047521	197.203075565994	0.10495754174117	8.56839447060302	42.4528993007817	7.95721071856601	13.5199544596112	5.21777300375646
Male	Non-Hispanic White	156	12801700	2015000496274	W	N	7	33	4142771	FMMMF	NA	2	28	323	86	86	7	323	4.81839394764019	3.21288250670764	0.249007976705482	0.0546275936012294	31.877182872654	130.715282417286	1.65368812991101	2.50538053750661	0.0674651113029777	0.334379311468349	0.336977079138276	0.219984143444055	1.51578233068305	4.49514974999739	1.65368863166219	0.149179693245983	4.72133955231246	4.4951903934534	0.881897890004709	4.4951903934534	0.220600585438632	18.2764175277514	16.169178798014	41.7138681133674	212.949946865552	0.17848078102873	15.0801252681307	69.4164336768002	14.491181291259	22.9238134948392	8.80381998487529
Female	Mexican American	223	14203302	2016001291487	W	M	20	31	2052	FF	141	2	42	324	248	248	20	324	5.07059695942438	4.19769016824844	-0.0873357798317513	-0.00917350928413889	60.9683202080004	157.814998297473	2.67796499425055	3.37821866711903	0.268602928466508	0.642368275364836	0.682758245727475	0.728830418649705	2.44325635006519	7.27940492574211	2.67796499425279	0.320216260791018	17.495197476201	2.67797402683879	1.7054819301261	7.27946358112066	0.358913857095616	21.7666606318217	58.1922583848138	77.7797972194952	235.817711628523	0.142113527354889	32.7993981371482	99.063086051077	31.2323850616029	42.2252256730485	15.7877894191363
Female	Mexican American	183	14000100	2018HU1170017	W	M	80	59	80	F	NA	4	40	325	964	964	80	325	4.96430038076544	4.11449606103899	0.198675481140598	-0.00611971502989434	74.676954873518	142.33460596627	3.36244607579283	4.05402304353033	0.288161988091018	0.908271351314648	0.709704045299731	0.814274086692799	3.93378568605621	9.1400521750305	3.36244607580019	0.504851183401595	17.7105923696244	3.36244607579283	1.85186124862185	9.14007605611645	0.369947344828727	21.2091159799224	68.6005284327756	94.5396870140089	218.246904186657	0.150843225895084	33.5751923135834	123.266258482977	36.0675317759039	48.4697722104698	18.346086163409
Female	Non-Hispanic White	176	12800700	2014000682270	W	N	53	37	53542422	FMFM	NA	2	28	326	642	642	53	326	5.09723003208361	4.31213244444144	-0.0862214353473302	0.0315427814426368	68.436821724999	168.809829740505	2.99763517544721	3.77477261260701	0.308269157302199	0.968892463714617	1.05342237829325	0.764375072885263	4.11191073786678	8.14830352633801	2.99763517537438	0.271330797893459	17.1744682875376	2.99834341677305	1.63277981128731	8.14841722556407	0.446645378337286	21.8302704369126	65.2823532232554	88.8701544184657	248.035311410839	0.142527524344509	34.9866832775167	121.256064365671	36.0743276412826	49.8836056297033	18.5879843555017
Female	Other	202	13500805	2017000979951	O	N	12	76	38127839	FFFMM	30	1	35	327	155	155	12	327	5.06203145982012	3.84923057630715	0.515220528652359	0.068205580482655	78.6062415220158	169.057186662474	3.61284975423029	4.6951782705524	0.344009218148297	0.890755943751977	1.44814283233184	1.10456956555026	4.72896598017853	9.34224052122811	3.61284975423029	0.522557077956138	15.0100489329631	3.61284975423029	2.32753426812568	9.82074382199308	0.572446675217506	20.75740672027	79.9084472495421	112.20291082821	248.307845986478	0.175524940545464	42.1514188679217	152.435514987918	46.4955080683602	57.4046651354904	22.4274735086425
Male	Non-Hispanic White	9	10501500	2016000046353	W	N	93	21	9387	MF	20	3	05	328	1124	1124	93	328	4.95603216399175	3.68975656519672	-0.124809235591285	-0.00543112943881281	35.3375921103431	141.259840457113	1.40133809844809	1.71923721152774	0.0649870439688096	0.466647328196156	0.312823239997324	0.310012495475161	1.32563632683348	3.80912262393203	1.40129792239979	0.137304559236048	12.1232847693591	3.80469864073109	0.754872224284225	3.80912267871652	0.168539603613512	24.2177580237347	16.6574092234727	37.2020188399162	225.707918374993	0.154239758161991	13.1782861865945	65.2332898366239	12.3992276276636	19.7906221238769	7.90710092720149
Male	Non-Hispanic White	117	12001302	2018HU0041098	W	N	62	15	335862	FFM	40	3	20	329	751	751	62	329	5.17598196009923	4.51250869425703	0.0387432579311617	-0.00609572787510781	94.7509577592211	175.894825182659	3.48598609381357	4.91716492536534	0.213685899875632	1.77077025875464	1.41910740288865	0.76161752998232	3.64014899316784	9.47588173872921	3.48598609381357	0.734415903633208	30.6036783689752	3.48598609381357	1.94208556517657	9.47589247055547	0.328439834027199	26.1805323398655	43.6238494526474	110.685390313877	266.055694607852	0.47634742040351	34.9298919045843	175.556790406636	34.4101788945813	57.4218537515949	23.186661289572
Female	Non-Hispanic White	152	12800800	2017000914491	W	N	63	18	6366	FM	12	2	28	330	764	764	63	330	5.08753573801674	4.32068431215022	-0.0779704727951237	-0.0162634743750637	69.5964694217753	159.376967931457	3.15561659035426	4.1905940236034	0.274618818410579	0.770665975137545	0.890000176367326	0.826681036227467	2.38986691454249	8.57719888659833	3.15560243805314	0.411592184632165	17.4038939446969	3.15560243760536	1.92452042313177	8.5778167639809	0.414513308692473	21.0548915137069	63.8147776094275	89.1520491026851	237.566054338713	0.163332819784195	39.4539057677009	117.648064204984	40.0434609149791	47.7140007553363	18.7416005040882
Female	Non-Hispanic White	5	10400122	2018HU0876976	W	N	5	18	35727	MFMF	15	2	04	331	63	63	5	331	4.70310711620237	2.9638868303924	-0.00558894353227087	-0.0218870081346591	19.2651523632878	107.901643955734	1.08602486065602	1.65689876023216	0.0739786439683677	0.151687423281819	0.122823734812322	0.224909339063498	0.80658251023797	2.9494876407666	1.08540810798377	0.0543789262423763	2.49153991859549	2.94949229304119	0.43335786891774	2.94949229304119	0.12376995315506	16.7201365577015	16.3006321260715	23.8505428904615	177.311237377679	0.0388956592209965	9.85376589110218	31.008636309563	9.1337483666922	12.4899572627104	4.8098225378964
Female	Non-Hispanic Black	120	11900500	2017000089769	B	N	63	81	3486327	FFFM	NA	3	19	332	761	761	63	332	5.09067802177999	4.4136721170713	-0.107504923061628	0.00529312110336878	74.155719070858	163.362415861833	3.25399534143274	4.01198349494629	0.276495843755423	0.995069282661454	0.886344851740207	1.06133491188637	4.42562120426442	8.84527548776036	3.25399534143274	0.259217257624248	17.9744921693362	3.25399534143274	1.7294894366506	8.845276406506	0.487926231328656	21.7891288369845	68.7366364308073	84.9113486069393	242.00777839499	0.162552960247126	39.5469945681318	142.155711355486	41.1346228508945	49.453248033909	19.6873045871946
Male	Mexican American	253	14802316	2015001297943	W	M	34	78	34	M	NA	2	48	333	411	411	34	333	5.13345857564343	4.43397602003071	-0.576525837203063	-0.0842557229648854	47.3444775693754	155.898141155331	1.81148972908939	2.54598716383609	0.0892786693141041	0.518400890427982	0.629786192662569	0.455972975205866	2.69231532103325	4.9208383460654	1.81148972908939	0.329330184030551	16.8672308448891	2.45784127184839	1.21547473578981	4.92413961302289	0.232502467208493	25.1356588116927	22.1273117255274	50.9517855756827	243.032002070054	0.213949062428844	17.7556693558492	81.5342388423776	15.8094391444803	30.1893379339951	11.0062493897484
Female	Non-Hispanic Black	151	12400400	2015000269488	B	N	51	7	23525121	MMFM	40	0	24	334	621	621	51	334	5.09564718420624	4.45570966731384	-0.359968939470321	0.0143162792363615	60.0838284428631	165.664301959877	2.56430340079726	3.03769295623896	0.24355262086486	0.357253860237479	0.512098019728616	0.754092682176358	2.15268508844936	6.96726619011063	2.56430335581229	0.455761774805503	14.8546605319138	6.90833141696366	1.53562876108818	6.97049921476101	0.399956556516868	22.4308582511021	52.3088768148753	73.2566429328388	244.560838990211	0.12392056669666	30.552572259131	110.616216107463	31.6888775161922	42.2744385686585	15.6782045030716
Female	Other	58	10603300	2018HU1095971	A	N	37	39	6374517	FFMM	15	2	06	335	446	446	37	335	5.08759536645997	4.21638776315154	-0.181525477478027	0.0608194821158629	56.5351340042952	172.158376814724	2.4268784891465	3.01746529252208	0.231166956507153	0.564058403637234	0.776565914218015	0.829056824592516	3.6776486669463	6.59508000533071	2.42687848914688	0.298407728987841	15.9015600831769	2.42687939742411	1.56213953416644	6.59693969692114	0.32894670437537	22.2954118869553	51.7711589444655	71.3660332451598	251.716296817958	0.118884551622185	30.6511576392584	103.790248765324	31.0468749104955	36.3425842705204	15.2721216528779
Female	Non-Hispanic White	82	11203102	2017001001787	W	N	41	40	4167934	FFMF	20	3	12	336	499	499	41	336	5.0935339278568	4.27775697088992	-0.279210931729195	-0.022255747335604	54.5188241434423	159.377910948563	2.18210587790641	2.86556237366359	0.188520254803294	0.689562543816558	0.262293866762658	0.609837253131155	4.07697590357297	5.9314993578482	2.18207667947986	0.175815537419472	14.4269407121121	5.93149938612432	1.01352242983181	5.93149938518903	0.277715928765836	23.9848342435143	42.0237174153741	63.7357351972923	237.567108578342	0.106193802762748	27.6912284257301	85.4118562926311	26.2258970734378	33.7651358699621	12.9597411860065
Female	Other	260	15000300	2018HU1164142	O	N	62	37	71655962	MFFF	20	3	50	337	746	746	62	337	5.06832760952693	4.3136361822748	-0.236294697364623	-0.0130123257027435	58.9884395519866	156.853976070455	2.57740075462438	3.28329661032717	0.224789119263443	0.711571532355198	0.859283851440068	0.802424497076208	1.77294570329479	7.00610151323521	2.57740075462485	0.474974132336454	14.2106589552402	5.83421416692688	1.62795059288533	7.0061016359457	0.296193092862395	21.8867937770831	52.3416758576807	68.5530892015542	234.73987202022	0.119357087594048	32.3042821080075	111.984300636014	30.877729066604	40.9859088942826	15.1254680821336
Female	Mexican American	155	12600500	2016000975195	W	M	66	53	13666733	MFMF	NA	2	26	338	801	801	66	338	5.0311928595681	4.21961449531274	-0.189667657689802	-0.0371013116750894	56.2579203628521	147.538852502796	2.65218784874405	3.22736473565754	0.237391845455013	0.394134540514146	0.724564353146044	0.780615368447853	2.47961145186337	7.20080443956794	2.64910091387241	0.341902541828534	14.3735243640738	2.64910091386563	1.3875217446438	7.2010028759146	0.305444823857969	20.2366090202141	50.4164451630634	68.5932103656118	224.204856423548	0.121539580440547	31.5150838100088	95.9895403773164	28.8401011340166	41.265093082721	14.8485322511171
Female	Non-Hispanic White	188	13604017	2014001332258	W	N	54	8	5444	FM	NA	2	36	339	659	659	54	339	5.09424911543098	4.35996539289405	0.102744914091748	0.0169222824284972	86.7222347420095	165.864534481392	3.65789393801603	4.35875260724897	0.351876644947391	1.34637997791771	0.638392877251394	1.02293075080636	5.67533438517253	9.94318651403706	3.6578939380113	0.489796233667107	21.0174121728387	3.6578939380113	1.84369923286707	9.94318662212656	0.550336343659964	22.7082420134789	75.5520418083403	105.69452217317	244.782499472624	0.193993625841628	43.5616286813645	156.183092527423	44.3789815282078	58.765612581392	22.3847105238042
Female	Non-Hispanic White	255	15310502	2018HU1359720	W	N	50	10	50	F	NA	4	53	340	607	607	50	340	5.09449712376443	4.3045135945246	-0.0171431416148011	0.0164015556672854	72.7748517777156	165.819306333882	3.13368642356774	3.87801745818183	0.285431200774322	0.861753533784351	0.834194725718288	1.03900897894106	4.98260932297071	8.50600751894984	3.13368642356774	0.431943741511886	17.8207158820063	3.13368642356774	1.86522618289602	8.51824286126932	0.498437121770519	22.223399517703	60.0930654098553	96.051686876424	244.732437068851	0.162445155742235	35.1595593694921	127.549434786116	42.7142138570046	50.4113603228638	19.1728678862326
Male	Non-Hispanic White	119	11800700	2015001364404	W	N	27	89	431278	MFMF	20	2	18	341	326	326	27	341	5.18100019671895	4.42098228892014	-0.0614920144964193	-0.00646143587932261	78.2172549248063	176.71508755761	2.82211583406195	4.04285992222361	0.162240517358705	0.690335837249634	0.56106829115698	0.961817091260258	6.43803753943316	7.66640915227175	2.82211583406195	0.538130381163438	25.8740415883885	2.82211583406195	1.78427749676421	7.67130596845626	0.163574582684671	26.715820159028	38.8847917185793	89.0598184560592	266.985690024946	0.367170674514682	30.8837153934278	145.793211833122	30.1774841534953	48.2760685864662	18.8366135821839
Female	Non-Hispanic White	5	10400116	2018HU1397003	W	N	38	27	111438	MFF	15	2	04	342	462	462	38	342	5.10833884304271	4.33745379373094	0.195553517500496	0.0232480723380183	93.0379348159967	169.285546839678	3.65251168240987	4.52826763895821	0.331090591885711	0.934783077872695	1.23370628335472	0.991864671758894	6.93872833895343	9.92854399002184	3.65251168241054	0.454763894947475	24.356230675542	3.65251168240987	2.26173615306631	9.92855599318056	0.567976017147099	24.4723168344836	73.530334237801	102.324844999716	248.559361712766	0.175422704920547	45.9526245772638	156.75641089702	46.1981185637614	56.2525853069922	22.6966493107055
Female	Non-Hispanic Black	156	13400703	2015000425174	B	N	69	17	3735269640	FMMFFM	NA	6	34	343	828	828	69	343	5.08017636439486	4.36773031710106	0.390229806187273	0.0987413271608922	116.508021334053	177.490607417167	4.63522103417888	5.48825253948031	0.450540346270775	1.04993457525227	0.975869971309897	1.16332885986513	8.66308986123835	12.592722637963	4.63522103417888	0.51924816124935	24.9169628474319	4.63522103417888	3.54346870676444	12.599836843069	0.621981583949361	24.1353755246954	99.5873803705584	159.606452870019	257.541218534555	0.240283993833258	61.6449798898311	202.822979011849	55.299468290622	78.0880268602832	29.8440118329857
Male	Non-Hispanic White	118	11601000	2014000569340	W	N	51	25	104051	FFM	NA	2	16	344	616	616	51	344	5.17662558119641	4.52497966807164	-0.435476344707137	-0.036827636884259	59.7102276630568	170.681277713957	2.20387303110628	2.90691515565855	0.124312873452149	0.656174427926433	0.557072714210014	0.635128061230999	2.24895401416731	5.98688099044147	2.20387303110628	0.294286760308314	19.9885602486004	5.97680946490082	1.20976212862272	5.99074801268716	0.338096977423733	26.0933156403678	32.1172003359679	64.6104516230922	260.119059968394	0.297726083231077	22.1904436053696	108.284093426248	24.2579709073377	37.6642770828576	14.3317345285265
Male	Other	44	10606709	2017001059227	O	N	56	15	563256	FMM	NA	3	06	345	682	682	56	345	5.12754876853369	4.50630741292892	0.16259285983638	0.0235140525058542	106.580468515696	172.614851555475	3.71335985476329	5.14560688164883	0.195491643735002	1.62396568071525	1.13700342538504	1.10547831635237	7.27501594733123	10.0939010953648	3.71335985476329	0.540867513164794	33.0322224494759	3.71335985476329	2.40143090778886	10.0939586112049	0.480819869337715	27.7018960413925	48.1662554011381	119.158428647014	262.326026652276	0.487239785108525	37.4303964742897	209.08857693368	40.367593683001	67.2093747337621	24.3527734057532
Female	Non-Hispanic White	225	14702900	2017000896325	W	N	70	53	7079	FM	NA	2	47	346	841	841	70	346	5.08370141678906	4.31789803221736	-0.111035447559543	-0.007967101345894	67.1455455301401	160.08970517103	3.0130901302329	3.65530142439997	0.288391577663678	0.525145427987528	1.13208372573288	0.722439172201875	3.68397260947433	8.1904273016427	3.01309013023515	0.261784017374556	16.5749501551701	3.01601194444992	1.95329883342148	8.19042814852138	0.403208516678184	21.2846123507596	54.5030064251811	88.1845324179569	238.362410143864	0.136178911721114	37.7595901762833	125.996097729449	36.3087720020736	47.4921366366778	17.9551856355751
Female	Non-Hispanic White	119	11703700	2017001069687	W	N	39	32	839381417	MFMFM	NA	2	17	347	473	473	39	347	5.10349726977285	4.31245335777199	-0.019853044501542	-0.0379502842697584	73.1564510760278	158.46709757696	3.15136958461051	3.86945848633353	0.274188510455468	0.450869658989918	0.654830041503204	0.801818010687651	2.80769298859992	8.55129624986981	3.15136958466044	0.305116967179117	20.8806721055349	3.17615372833354	2.10206700831602	8.56631067660089	0.42634619230902	22.2141769195495	60.7553667439454	90.8715440133248	236.548142535282	0.147657057176256	35.5345833516901	123.701048979878	37.2262245209301	48.3878639689117	18.6362655420429
Female	Other	264	15510000	2014000051270	A	N	3	19	3631593	FMFFF	10	4	55	348	43	43	3	348	4.61427299508023	2.754750996189	0.256980959942681	0.0352388838764137	20.3225672572847	104.53394790213	1.15788213304076	1.47038679798175	0.0817107178896268	0.20357466075527	0.140294705882895	0.151093482923908	0.656761368429343	3.14740609001323	1.46296088215898	0.0488497716496518	2.58004334551361	3.14740609273329	0.546938986653335	3.14740609273329	0.112444815909326	16.5486404156558	17.8710342576377	25.3570670932479	173.144311938405	0.0430853858009464	9.99709597416144	34.820572090488	10.053157369469	13.8932700275744	5.01194777351302
Female	Non-Hispanic White	80	11210700	2015001297261	W	N	60	17	4160	MF	38	2	12	349	723	723	60	349	5.0926981124416	4.33689532268205	0.0482544201669	0.0158114854315151	80.2502392126723	165.423623334741	3.37606234415833	3.8959913623371	0.288640751234122	0.803442776422408	1.06601069283279	1.13853575537954	6.79232363266384	9.17708826395049	3.37606234415833	0.11736466544731	18.5889704482326	3.37606234415833	2.53422299871188	9.17708892187036	0.432608463323269	22.7703664896861	71.2919686640767	97.4538741939571	244.294315387587	0.164752051560625	40.5195903303847	143.179766631674	38.6321880588135	55.7790660285133	20.6188209767993
Female	Non-Hispanic White	259	14804801	2015000688749	W	N	78	14	7978	MF	NA	2	48	350	937	937	78	350	5.06834182910175	4.25563170464532	0.205083935960464	0.00512558966101076	86.5494252219358	159.727209375301	3.79161978696397	4.78718785837432	0.363044015167206	0.680908472298313	1.27732653251823	0.974800909290599	4.16567959684941	10.3066898687385	3.7916197874137	0.496837834703531	20.0709643918551	3.79161978696397	2.03962871812514	10.3066911655993	0.489548588683482	21.82650426066	79.5389823427795	112.506486902445	237.957497235082	0.190733138751587	44.5632258028267	147.978711277794	42.4503593160196	57.2113183343085	22.556108874324
Male	Mexican American	261	15500200	2015000627010	W	M	21	15	202121	MMM	50	3	55	351	258	258	21	351	5.13810369233344	4.35378076203533	-0.209570140340753	-0.0553841210746376	63.067817880019	161.211887517523	2.40552482544716	3.41343513403175	0.128262689298981	0.834507763455133	0.6431918181688	0.763493152947729	3.3811163714267	6.5388936894481	2.40552482544716	0.276002168366262	22.0668886075834	2.40552482544716	1.51743950022862	6.53889442054545	0.213166787661159	25.2179035580287	30.6351455376145	63.1841325476177	249.218661405951	0.301405127113092	23.7871112834107	114.683766436714	23.6918035115956	40.2183497597891	14.9875419244181
Female	Non-Hispanic White	179	12603209	2015000387171	W	N	4	14	836424	MMFF	NA	2	26	352	54	54	4	352	4.65971718718497	2.87726652881308	0.229144060327464	-0.0499722400221819	22.340710322751	100.458524136996	1.29045488100491	1.52052842893628	0.0848853994579889	0.276998611486612	0.0789274414296619	0.21524179653529	0.786043949615436	3.50375808786124	1.28906062579203	0.0319233827508657	2.93948611378771	3.50402915787081	0.54108875977774	3.50402915787081	0.131478234713888	16.3308611511325	18.339761748608	26.1353799027513	168.056498082487	0.0428201448606	10.2371236428203	36.9550739313452	10.5721292842991	14.517878553136	5.41587394733569
Male	Non-Hispanic White	83	11205704	2017000314192	W	N	3	25	373403	MFMM	NA	2	12	353	38	38	3	353	4.57564852172526	2.73584134463801	0.0511187093711137	0.0103120774490598	16.2316015334054	98.0973741534977	1.01684555244473	1.36130403013346	0.0355348368273461	0.205965888118629	0.0771999764464564	0.178039289215197	0.627441834256238	2.61602153214155	0.962385556105377	0.0310856576444604	2.69968194748238	2.61602155710372	0.395289399664895	2.61602155710372	0.0585769721247813	16.8660947671596	8.40009107108141	18.8452374909468	171.702175864757	0.0857878423905618	6.65372670322425	30.3376575235466	6.89162894470938	9.01016433328608	4.13107085476905
Female	Non-Hispanic White	146	12602903	2018HU0267291	W	N	84	18	84	F	NA	2	26	354	1010	1010	84	354	5.00331141122658	3.92446520323047	-0.218441623112222	-0.103171620205031	40.6916771992436	134.308553502596	1.85599924627737	2.08951773398927	0.140960261166095	0.399843291164622	0.386186535332943	0.559172892257973	1.91797773301554	5.04510485909103	1.85600444335485	0.162605439582024	9.64961594835024	5.04512902478947	0.839589562812277	5.04512902478385	0.293227007096723	20.924403942998	33.6931941346419	45.582043846131	208.95028521233	0.0785541157295073	19.861348762541	65.5979316171092	20.0595444166057	23.6125551497943	9.69528929658816
Female	Other Hispanic	79	10900105	2014000540775	W	O	55	28	2159555672	MMFMF	NA	3	09	355	664	664	55	355	5.03769914835118	4.29713527160753	-0.383206436095614	-0.113171789771662	50.0953823666096	137.624279333622	2.17202096400629	2.92849806025277	0.160810486851098	0.321024226515637	0.471559510428195	0.549083982446197	2.66806695143254	5.90416290668919	2.17202071696192	0.16016817914828	12.2101398848814	5.726267382471	1.23188441856494	5.90416444594029	0.229503741824224	22.0639523718591	38.1948319720244	54.2267940369458	212.807293222075	0.0950702229381962	21.8600365720987	78.3346845683727	22.7214851965072	30.2553133631813	11.5555462399523
Male	Other Hispanic	272	14805903	2018HU0196015	W	O	62	34	6262	MM	30	1	48	356	754	754	62	356	5.11842958236558	4.36247766802288	0.127236337241636	0.0712395588668058	89.0959612587257	179.409184009489	3.1672385922593	4.56056524869981	0.175126097491005	1.0819627278435	1.299949714087	0.527430128677322	6.80051361800915	8.54698521227829	3.1672385922593	0.708545458215059	28.0984642621364	3.1672385922593	2.25254861296082	8.60944711168472	0.502624852690858	27.1304861201412	38.9694035941709	95.4404014322969	270.032641691904	0.430970125566691	32.4970504005887	171.932652840172	33.3646684617721	57.8128184716854	21.3814450984082
Male	Other Hispanic	56	10607305	2015000471869	O	O	54	22	544479	MFF	60	1	06	357	650	650	54	357	5.14546476331114	4.46738652789958	-0.0218639702100156	-0.0123133096162694	85.2444113232806	169.550607858732	3.12316521350942	4.09178246105787	0.163150401186623	0.978184508219193	1.06287444871293	0.909815697946814	5.61798798626788	8.48940184098316	3.12316521350942	0.554509736464899	27.6424557387096	3.12316521350942	1.85551454474726	8.48964324715796	0.383507993513708	26.2942369345532	41.5463187314334	97.9618093902194	258.825627273768	0.417925226910223	31.8976607447293	159.224175702613	33.0366173524233	48.4288015450979	20.2088798866546
Female	Other	192	14100200	2015001158399	A	N	7	54	3837391	FMFMM	15	4	41	358	92	92	7	358	4.82438495117295	3.2483260198894	-0.216343631796244	-0.0078983685503471	20.7383032323626	123.530313899255	2.70369418235302	1.39640254122178	0.0793140517852207	0.243730537772329	0.172520193971742	0.234437705819984	1.05129397114732	2.72327133702681	1.00183553826458	0.0195462329775342	2.33860293190734	2.72327133859065	0.504698224676791	2.72327133859065	0.11966330680064	18.9772093916249	18.251612770049	26.0399163047509	196.243541697379	0.038863239406969	9.95258072627647	34.9976672052056	10.0297990949661	11.5996462727265	4.91509385536146
Male	Non-Hispanic White	119	11801001	2016000804230	W	N	55	7	545516	FMF	5	3	18	359	662	662	55	359	5.17405240119036	4.48503334223227	0.182299773064232	0.117158061666694	106.413570949975	198.583658125838	3.75058989521899	4.84430695782091	0.251149199700383	1.67552337168307	1.20268278598602	1.37407462629736	6.56102759281667	10.1920461412849	3.75058989521899	0.439247008383971	32.7113774508353	3.75058989521899	2.71699946340758	10.195160358169	0.489274208514265	27.3724891078132	52.6136851334265	141.057394607909	291.400566570662	0.508320015603132	45.0531376646145	202.799066396532	47.8977287370977	68.388861867506	27.3231005110253
Male	Non-Hispanic White	119	11703602	2015000114389	W	N	13	16	491350	FMM	20	4	17	360	166	166	13	360	5.11004057989348	4.06944348078564	-0.105889628936699	0.0440533151823221	52.6440831711033	173.138853693749	2.49690888118209	3.48446668027388	0.1378066264937	0.801718950465005	0.627134962259635	0.766648290296237	2.7633847145518	6.72886528258265	2.49690888118209	0.203879939753574	12.0250754895099	2.49690908137766	1.63343236619354	6.78730201144122	0.518700627976163	20.0837021597457	33.3013035224085	72.0606457040844	262.923052212229	0.327416442194699	27.0553416276072	127.197055715257	26.7497838034132	44.3869204997399	16.4123726034054
Female	Non-Hispanic White	193	13402104	2018HU1212983	W	N	28	60	28	F	NA	1	34	361	344	344	28	361	5.10390303036164	4.29406404343059	0.155172600932952	0.0405072684024406	85.5616051334331	171.470338580422	3.47839148287895	4.55566081415344	0.358351867199322	0.837819829642853	1.23557317468675	0.933881019503534	5.1821215963149	9.44701117279071	3.47839148287895	0.271446131202445	22.8017958722049	3.47839148287895	2.05080257000586	9.45524831694006	0.530339185065984	23.5980377868844	72.9425919181377	102.025125183574	250.96142314708	0.165815330689501	44.2435950117355	157.259886891334	43.1325234686734	56.3484087755384	21.8235519201495
Female	Non-Hispanic White	227	14400400	2015001324383	W	N	49	26	1294911467	FFFFMF	NA	1	44	362	589	589	49	362	5.10086961000413	4.31555713150586	0.403142237886212	-0.0286107971145266	112.022458038183	159.53427874398	4.31152517235994	5.4250860564584	0.340060668534522	1.21541727042677	1.36871738932807	1.32646098960765	6.65496415384506	11.7137277415287	4.31152517238785	0.517433953007775	28.4622380649383	4.31152517235994	2.92200216081354	11.7199405276093	0.409888930658059	24.9820953281984	88.5682877101485	124.560509767569	237.741897344041	0.192303751529562	48.2726794745073	167.151128554973	54.8238133531188	66.6444633504927	25.6257543730861
Female	Non-Hispanic White	47	10603768	2014000360319	W	N	10	30	4343107	FMFM	15	3	06	363	129	129	10	363	4.98524804488582	3.71460641611347	-0.307093579424464	0.0249934873741487	30.1900631868382	149.940947351659	1.52446528262735	2.07659219669052	0.14146882084015	0.20238926222227	0.370756066848734	0.410382438233704	2.15595731330212	4.11612198593315	1.52446528262374	0.149851278974371	4.44663514569686	4.14392627587257	0.904938386923988	4.14392627587161	0.19060720107647	18.8037061855584	30.3090295629542	45.0365762923358	226.937048536909	0.0723173762641153	17.5927835326227	62.2401167313025	18.6626047101693	23.1089497973874	8.64894129588994
Female	Mexican American	217	14203207	2017001287875	O	M	34	52	34	F	45	2	42	364	418	418	34	364	5.04383993462528	4.29167602794884	-0.0286663357959525	0.0103792456666278	71.0234207349654	156.682142064366	3.03402007394811	4.13061873815719	0.264358359996518	0.862181353974025	0.720075800227018	0.797342581942131	2.60098603734184	8.24723578738424	3.03402007394811	0.219981061763125	20.0569886430974	3.11378590421425	2.18090943975193	8.24732163037471	0.351710416070287	22.4090147737698	60.5438929066336	85.5719188059791	234.546976916293	0.146293857425798	34.9972592173508	107.907626412038	32.1699194092118	46.1827228165822	17.7905059061969
Female	Mexican American	189	13902300	2014000087791	W	M	53	53	225351	FFM	20	3	39	365	641	641	53	365	5.04919170879974	4.31160908992428	-0.0473305559404321	0.0043712783653969	71.1135954187789	156.579362045115	3.04694062990608	4.16678239605461	0.292002991427609	0.84138398508172	0.932982513427766	0.946676847324312	4.87365609966333	8.28241963734843	3.04694062983221	0.434622235458249	17.2249410673229	3.04716311836911	1.99533120321425	8.28244334637442	0.468459637040063	22.3393439709703	63.1852163667734	85.6100379720545	234.431574230423	0.146320765000292	40.4185158438292	120.505074768297	35.5251361292758	50.2740930242708	17.8574772109551
Female	Other	263	15151084	2017000342729	A	N	7	45	3642117	FMFF	30	4	51	366	87	87	7	366	4.79722832908528	3.1675012728604	0.136515715896945	-0.0129628479178603	27.2217691270447	119.613472460999	1.52254744083714	1.95110367952827	0.120309344795576	0.341480298623991	0.212608417570409	0.401866054358607	0.554693652325044	4.13855325842227	1.52249184100395	0.0554177666527877	3.6101352664023	4.13856190536768	0.890504249825984	4.13856190536768	0.152530749582045	16.879747033178	26.113310278069	36.3750231538893	191.557997443537	0.0558502476848464	14.2598437008112	48.1680677038442	15.4668629265536	19.5493055656748	7.29113720465248
Female	Mexican American	264	15500900	2016000198244	W	M	16	16	451648	FFM	NA	6	55	367	195	195	16	367	5.06575270793564	4.12834400685425	0.242781600407409	-0.00159722221579655	79.1326538779991	158.246743991569	3.30476063770616	4.33043833839718	0.302291264345396	0.854782609026784	0.851497740599197	0.979427398217179	5.04253079716937	8.78582704789233	3.30476063770616	0.325200089833198	20.7815678458557	3.30476063770616	1.92471039668019	8.98327078888334	0.46088646469243	22.9450485385003	69.1345464001169	94.4935380021216	236.301403792218	0.155950132024763	37.6020066919973	119.59920758788	39.9059377915511	51.2829750359899	19.5229894471807
Male	Other Hispanic	56	10603759	2016000541241	W	O	38	18	4038	FM	45	0	06	368	460	460	38	368	5.13910150376395	4.38918651318789	-0.252388758742408	-0.033954695698991	62.6020330518611	164.868272747153	2.39186860524265	3.37727128942406	0.121413273887676	0.848147433776191	0.757209197980926	0.559354126449647	2.77686937957416	6.48027317482955	2.39186860374019	0.180886501799511	22.0459691515379	2.39186860374118	1.90805781098611	6.50177296160865	0.439749976350972	25.1728562154165	30.2160093480282	68.8838177895628	253.446079679005	0.322005759144615	25.7244029968503	115.097723480186	23.5525742217109	38.4594543991192	15.1552430181312
Male	Non-Hispanic White	23	10400108	2016000328058	W	N	7	26	974548	MMFM	5	2	04	369	91	91	7	369	4.84125957625474	3.27510118712592	0.103678144039195	0.010160622948508	29.3349410011345	127.921935530915	1.52758987374755	2.23549483644648	0.0613621057566547	0.519495711922244	0.266550514117866	0.266132970836019	1.55120978347689	4.12378821765011	1.52125243798957	0.0804844351519786	4.28541613775157	4.13519207623075	0.79835171259866	4.13519207623075	0.208760374534555	18.2834172752162	16.3098157766092	38.5926653015618	209.527739837952	0.181655760928353	11.7538134014972	59.987664136428	11.7356378095155	19.9116870930425	7.96861311856328
Female	Other Hispanic	182	13900908	2015000876076	B	O	87	51	87	F	NA	1	39	370	1053	1053	87	370	5.18370211779385	4.61615321364536	-0.229280551977008	-0.0403197338323096	80.3886230378898	171.294172238705	3.57687575225994	4.48290542494986	0.334435652532441	0.692108174306193	0.747200275069294	0.926779910898088	4.80901611636627	9.72295289937092	3.57687581618312	0.348310248912902	18.201771159497	3.57687575225994	2.04452548612496	9.72295630246446	0.533772838850224	21.47453604926	70.8049981504936	111.507075140523	250.768022485145	0.180416353946223	47.341478371575	141.947677608294	46.6432971159189	65.7578556291035	22.4241514767322
Female	Mexican American	130	11702501	2014000821899	W	M	14	28	1440124012	FFMMF	45	3	17	371	170	170	14	371	5.06244917345954	4.03448707374986	0.183050891168218	0.026604645348569	67.8661894916904	162.236284487821	3.01988763123103	3.87204567038478	0.285109137174456	1.10545391964149	0.907731423132459	1.01834370132866	3.8484738399623	7.08565918269304	3.01988763123103	0.341105982106982	16.9670848960917	3.01988763123103	2.1651791535378	8.20890567163105	0.348977876518966	21.4730843591109	62.4092057058103	87.4345472632167	240.75549494878	0.158384604961255	34.0317405080085	134.279545299546	36.4974291399657	50.3059481642387	18.1763635336682
Male	Mexican American	153	12901400	2018HU0189839	O	M	24	16	2524	FM	NA	3	29	372	297	297	24	372	5.13987650833669	4.43707048222209	-0.0899880276786755	-0.0634008772372989	77.2527454184233	160.208426175306	2.89616106313686	4.02832911917669	0.144136175498933	0.798457503488793	0.678977626971578	0.943312988170471	3.76478612379305	7.86367520259945	2.89616106313686	0.614056493587461	26.6258767859269	2.89616106313686	1.67746847860539	7.87258170502657	0.140832477871279	25.6741882562119	36.1370192532947	92.562647988054	248.054310030105	0.361666975351289	29.9951220022023	131.976136673401	28.8060078059407	51.6845862839277	17.9601308563117
Female	Non-Hispanic White	45	10608900	2014001136905	W	N	66	24	396066	MMF	10	4	06	373	795	795	66	373	5.08867964260629	4.32249004204197	-0.0316803749525037	0.0268843775748639	73.0255709712457	166.594717272463	3.31661928058825	3.77956425074068	0.30956480804888	0.687175363495612	0.768414921056933	0.99543878762717	3.04203705749149	9.01543987086594	3.31661928060375	0.484410001695356	18.1098924578593	3.31661928058825	1.71201277564336	9.01550585988242	0.456330911487685	21.0180746697865	71.4595861622573	99.761270556798	245.590257110733	0.169243299604321	43.5846350179392	144.022135552819	37.8321270202353	50.8633674738674	20.363234546452
Female	Non-Hispanic White	218	14501102	2016001306880	W	N	80	58	80	F	10	1	45	374	968	968	80	374	5.04741522174527	4.12186633276454	-0.177199067215381	-0.0116070236192156	51.6591464744075	153.823862545166	2.2613329237603	3.01153181945229	0.192310432253656	0.476316963304906	0.595104123072541	0.766498989026419	1.80019047423023	6.14694017390505	2.26133292378983	0.400378606625183	12.0935044688376	6.14694019475379	1.31491942387337	6.14694019475297	0.293100988408554	21.8445559393764	40.8382620876794	62.4948673906018	231.330554426324	0.0974792732141274	26.3573618509467	85.3211874304668	26.4526376844545	32.946986831093	13.0778849748993
Female	Non-Hispanic White	79	11200901	2015000862601	W	N	58	50	6558	MF	NA	1	12	375	704	704	58	375	5.08630200547679	4.31509395270221	0.111726588744091	-0.0106130785589158	83.6649842291291	160.082439100297	3.64968138331728	4.52221207498278	0.348580015425244	0.452359444866652	1.10690801969087	1.06461718081621	4.0067689111457	9.92086255347594	3.64968138331728	0.270886301611619	20.3418752810708	3.64968138331728	2.35046570298149	9.9208625839169	0.408385463176319	21.923914567327	71.7361140230911	90.1884217836562	238.354296093261	0.173368657233463	45.3302672176526	132.056048374313	40.6408604897326	50.4210801100581	21.7479309271317
Male	Non-Hispanic White	9	10501400	2018HU0894129	W	N	59	13	5955	MF	NA	4	05	376	710	710	59	376	5.18131802531044	4.53036841684924	-0.125247659966324	-0.0511157729522083	81.8690284949635	169.051305612735	2.97170563596895	4.13488840850964	0.170249896149368	1.1950401839917	1.04746164228397	0.706299355627686	6.28084555400749	8.07432608619051	2.97170563596895	0.310378187475351	26.4829245927323	2.97170563596895	1.80031151621369	8.07793342407047	0.266886394515597	26.5495081020262	36.4716913027083	91.2754148080389	258.253763295741	0.412511742446136	32.0390376033735	138.773185548187	29.2510416479041	46.8998414567514	19.1863540974036
Female	Mexican American	261	15310502	2016001236144	O	M	41	18	4541	FF	NA	3	53	377	502	502	41	377	5.066611016632	4.29868676641895	-0.0690673578630493	-0.0319327256461067	68.6910839594276	153.650154020281	2.93867515341708	3.58588112086244	0.27626950693013	0.720067976652219	0.865023341784038	0.889710213168502	3.28408623032815	7.98690328600201	2.93867515341864	0.523246182842416	19.2465474964701	2.93867515341708	1.80292474908178	7.98814726927773	0.280119232793762	22.3748476348445	57.1050491460902	81.7477846136086	231.134600932632	0.124943197581799	34.9670110874423	116.965164649299	33.1423584489905	47.3601028998995	16.9807377213924
Male	Non-Hispanic White	83	11209504	2016001323766	W	N	10	13	45108930	MMFFF	15	3	12	378	120	120	10	378	4.949587676935	3.59803402034031	0.154795883372293	0.0653245944274061	42.641582990561	150.642920488025	2.0439387765525	3.0300179852133	0.101558392709198	0.85356474455301	0.492947662288409	0.581637459539596	2.56927027511253	5.52008019851269	2.04393877662231	0.170523606550573	6.5297775105933	5.55600163478546	1.26724111797489	5.55600163478546	0.184775412751324	19.8624560323259	23.6634450163312	61.227138724105	236.861408172536	0.232944184813391	17.2311253765504	91.7432269637709	18.5571050558724	32.4381616620753	12.1032554208169
Male	Other Hispanic	203	13702100	2014000815757	W	O	5	97	28853469299	MFMFMMF	30	2	37	379	65	65	5	379	4.7219902112078	3.05139441513081	-0.0911451161870603	-0.0336296889307783	19.3027833192118	108.674863656666	1.04197814102486	1.55609818514701	0.0414918260487169	0.246088741146513	0.164101112851571	0.200288987294435	0.766419689930496	2.79979804854532	1.02998965883972	0.039140223466161	2.88214152904005	2.79979804860509	0.489757823067896	2.79979804860509	0.0868807905195011	17.3576831767756	9.3652836170856	22.2486034220426	185.408478442798	0.101382742390661	7.55971817287967	32.9377839929525	7.79217569301823	12.9824739129278	4.77421335330467
Female	Non-Hispanic White	228	14800800	2015000272289	W	N	3	13	25579334	FMFMFM	50	4	48	380	47	47	3	380	4.62576567199366	2.80996509013044	0.0694977510302839	-0.00926833576078091	17.8047066549101	101.1391545319	1.28814106677856	1.30083755132422	0.0639478585776131	0.172249817813503	0.0860009391032343	0.239680468009129	0.544345834877278	2.68295940308836	0.987051984143434	0.0379152357872753	2.22484381698642	2.68295952298263	0.330955552331708	2.68295952298263	0.0863595146248747	16.4509244242506	14.2082535198785	19.9321398346421	168.909743947512	0.0307241403291768	8.55570459860738	24.7601843780164	8.86203276923723	10.8725880352002	4.1678717904081
Male	Non-Hispanic White	109	11600300	2016000560030	W	N	63	34	63	M	NA	1	16	381	759	759	63	381	5.18636920862586	4.51056380597144	0.0852773850977461	0.0103931404763029	99.0714385151901	180.686294696539	3.52648897706078	4.89819877889539	0.206081373027236	0.945307781309392	1.22153769054495	1.33442737845991	6.43237331951958	9.57311049201356	3.52648897706078	0.604641169058086	31.0348528960053	3.52648897706078	2.27441181616239	9.58599090405295	0.433955222225792	27.0935057956038	46.0940849220928	114.383870737296	271.473017872081	0.455820100170909	39.3401889720002	172.687834877967	36.7691284604604	60.1671000882044	23.9336651273829
Female	Non-Hispanic White	5	10400208	2015001256880	W	N	17	17	131351617	FFFFF	NA	2	04	382	208	208	17	382	5.09933266322021	4.14507586188724	0.221795690306458	0.0180730185515112	78.7967342276681	166.901811059072	3.20373797885618	4.10174744417596	0.316043351993751	0.766843398402407	1.29222001380846	0.937864883286925	6.24813303242406	8.47279213957107	3.20373797885618	0.332933006201305	20.7441491513408	3.20373797885618	1.73424582465798	8.7086627310687	0.461275102726218	23.5952492830892	65.8644856282333	90.0836925738679	245.929712099872	0.165304559973303	41.4055516283806	122.922884317004	41.3829805710177	56.4888050955956	19.6973589695881
Female	Non-Hispanic White	46	10603735	2016001288108	W	N	2	7	1228844	FFFFM	NA	2	06	383	27	27	2	383	4.49186663161661	2.56959048657346	-0.232677651187079	0.0112496684446958	10.3492373953327	90.2980892395604	1.62180676830679	0.705536100684731	0.036126617643534	0.0643233402895186	0.0425258947348091	0.0902591913231506	0.363210652105385	1.62180676822622	0.597429028796135	0.0147103575825822	1.39721356605923	1.62180676830679	0.215724633888244	1.62180676830679	0.0447419678435154	17.3461749573979	7.58582354208271	10.4296012407889	155.140124203417	0.0182865218503122	4.736042479214	15.7673008496405	4.52223514188457	5.81860589347296	2.31402885487126
Male	Other	119	11802100	2018HU1031940	A	N	8	40	405845	FFMM	NA	3	18	384	103	103	8	384	4.86451647005591	3.35724339755921	-0.181249701551822	-0.0492524421323169	23.9506076707124	123.379383612592	1.26505942509922	1.92838818918302	0.0534838783521802	0.22587939967252	0.279721718715868	0.356184584365476	1.16783302154813	3.43006359301415	1.26184999480008	0.0604229658428919	3.66739923677401	3.43006391110617	0.544357484014855	3.43006391110617	0.167320716866026	17.980369782225	12.3378672416447	29.4646719748469	203.92229447933	0.132306638442234	9.47367752476698	46.1880401120589	9.78967069102125	15.2422748472735	6.43298365570902
Male	Non-Hispanic White	153	13000500	2014000542712	W	N	63	31	6063	FM	5	2	30	385	766	766	63	385	5.18067673267654	4.47428381495801	0.057092266105448	0.0539189896235681	92.8862922455524	187.653226992082	3.30590940486214	4.78569102040462	0.192013134155518	1.30317460531562	0.960316831147925	1.3670404059449	6.19947492865548	8.9513569299895	3.30590940486214	0.218207531891978	29.1822867562455	3.30590940486214	2.27018176723054	8.98639336819297	0.814054992414136	27.0970470966145	50.0498535727188	105.580167434832	279.286401129164	0.463481122219126	39.1733340696867	176.431512177802	35.5431612963787	57.3746172078883	23.082388503575
Male	Non-Hispanic White	261	15159306	2014001159462	W	N	67	15	6667	FM	NA	2	51	386	808	808	67	386	5.16405464708979	4.47005705028233	-0.214156509926758	-0.0435435213153701	70.5202949734994	167.42092090336	2.67464747642912	3.88458173585234	0.148719512579756	0.958220588554948	0.902558674536844	0.716239675311694	3.9479409346671	7.26880955010722	2.67464747642912	0.457900963413965	23.3046632126329	2.67464747642918	1.59559476991484	7.27044554870617	0.501034239071611	25.3662017499398	36.7246812125065	76.3573451873548	256.383490988421	0.366109129306609	28.4816503026059	130.805909405526	25.3347358300167	45.0445423581219	17.1433864292567
Male	Non-Hispanic White	83	11208607	2016000410409	W	N	46	9	4311104688	FFMMF	NA	2	12	387	562	562	46	387	5.18241755731493	4.49797551052247	-0.139986333072703	0.0133567943502456	78.0999313192124	180.507865258908	2.78549416544156	3.93522081018877	0.158415434029503	0.988014576307293	0.516520210405514	0.809017412263841	6.58593361059991	7.57161509990702	2.78549416544156	0.50165630196835	25.3980400768481	2.78549416544156	2.07474634134505	7.57175816798087	0.622312174082454	27.0380882818442	39.809568227668	93.7618695541426	271.271931399226	0.385502811361296	30.6810495215566	137.583690288664	27.4692380243404	53.9469051876434	18.8906595540152
Female	Non-Hispanic White	262	14804905	2014000851559	W	N	41	25	411541	MFF	3	3	48	388	495	495	41	388	5.095545487872	4.28211052823936	0.287563113256337	0.03245998717191	96.5126069224715	168.680345147559	3.88251075411175	5.60704997404474	0.342640003627047	1.03132990968499	1.01048222522284	1.05559267587216	4.70825300598678	10.5535217973188	3.88251075411175	0.235670975301202	25.7259069377672	3.88251075411175	1.86888556373616	10.5537584316971	0.678044394424194	23.8582973840473	81.7686226409743	116.459872739078	247.892607198623	0.1932475696333	50.5290714974123	164.922269228397	52.6339093382863	61.3473619760043	24.0611428328363
Male	Non-Hispanic White	11	10400205	2018HU0484364	W	N	42	64	123916942	FFFMFM	20	2	04	389	505	505	42	389	5.18361937645674	4.53661862090667	0.00512337241959883	-0.0317910621701902	93.8541511048701	172.747037645997	3.3628671547465	4.90435155170851	0.192013798938367	0.78177301111254	0.991972068263488	1.23936351556192	5.27776903245493	9.12718193260908	3.3628671547465	0.661945041486808	31.0450195521537	3.3628671547465	1.8814513294404	9.14122028967683	0.324526384379994	26.9089677902977	42.5249091446577	103.239539333498	262.476676495113	0.469865929795842	33.8976363542711	175.267475214073	33.8122345645238	53.9379550424616	22.0668548568109
Male	Non-Hispanic White	44	10606511	2014000767165	W	N	29	25	54295523	MMFF	NA	2	06	390	357	357	29	390	5.18448563712451	4.46165635238485	0.0633393009081479	0.0108446297441616	92.2955246461826	180.427722256758	3.31171925288206	4.48534225148811	0.207552726496523	1.09321806825361	0.981259577871859	1.10865426145183	5.94298899308244	8.90526246701741	3.31171925288206	0.591467931528302	29.8367114694117	3.31171925288206	2.00615818173907	9.00218626588798	0.521972741921658	26.8693686265409	47.8106970862392	111.613775013969	271.181595638497	0.438867731240416	33.6705217577493	178.839090435751	37.3194919267747	61.5514394857947	22.4519327825822
Female	Non-Hispanic White	103	10901500	2017000535605	W	N	23	17	212372	MFM	NA	1	09	391	276	276	23	391	5.09436580250543	4.26256526997763	0.0977757583992617	0.000784645285214731	78.2838268778001	163.22840012935	3.20347068113756	4.30200274919806	0.311666605311233	0.668485122981621	0.812855996203248	0.937788148236967	5.19150344630821	8.70768767371404	3.20347068113756	0.289131580692691	21.3424027777225	3.20347068113756	2.02497056819574	8.70793614051667	0.38685596628564	23.4371916180613	64.487190516159	87.1759967149669	241.858863282809	0.152274899443021	40.3005588910191	133.670840118632	37.381723473895	46.3122656070764	19.3696944374934
Male	Non-Hispanic White	183	14200900	2015001508224	W	N	23	15	23	M	NA	5	42	392	287	287	23	392	5.17688111098762	4.44069493527793	0.235949552530024	0.00215039007635437	107.409054817425	177.510808685438	3.74046212862719	5.4572236293352	0.205741474854829	1.30349215840129	0.474034432156764	0.882709384592172	6.37678368138565	10.1676285136575	3.74046212862719	0.574547357228996	34.9985548580642	3.74046212862719	2.21424202227422	10.1676302341167	0.741921971486538	27.7154504239951	41.5642689873081	130.720720487973	267.886830405112	0.501633486433532	40.5731829903756	195.584520831444	43.072238858079	68.8021097789584	25.0505135972074
Female	Non-Hispanic White	192	14201100	2017000271944	W	N	4	20	294227	MFFF	NA	2	42	393	56	56	4	393	4.66950574162975	2.89655691907711	0.29742755640979	0.0345696290881981	24.3853971452662	110.396162217702	1.37491587572127	1.95361915391865	0.0938730337024369	0.328162861122699	0.173670911079951	0.382267671116845	0.650608415552016	3.71635448746422	1.3671706072598	0.0445288659778759	3.08006237487278	3.71635465778143	0.692392024269079	3.71635465778143	0.160944981410309	16.8363885627788	22.1114409356573	29.665789824848	180.376807646159	0.0510512896738245	11.6042822616981	44.2193767736198	12.5043533110741	16.1184354609132	6.16514614335956
Female	Non-Hispanic White	254	14805204	2017001357217	W	N	54	69	54	F	5	2	48	394	657	657	54	394	5.0935197513216	4.35759554302543	0.166491110288661	0.0701377921586349	92.2116661356925	174.802636049115	3.79611975001222	4.75536447619768	0.370153481101129	1.38802325934222	1.31617162144505	1.34546848096921	5.80993101548808	10.3189174727424	3.79611975001222	0.511918450763602	21.3768933366214	3.79611975001222	2.54323379779592	10.3189231436651	0.520001830547795	23.2910319505583	82.8017101645548	113.145908056082	254.610434254571	0.188578684384918	49.3886012252491	172.32074431524	47.1814547598497	65.4201410725641	24.1632924508242
Male	Non-Hispanic White	188	13701704	2016001296359	W	N	77	10	8177	FM	NA	2	37	395	933	933	77	395	5.15159335009207	4.43775627056287	0.642685154588903	0.0370134855585269	160	179.218697827072	5.24501720244973	6.24436930487745	0.281437701822226	2.10891282666573	2.26960059883674	1.49556492581108	8.31842351972997	14.2572115558733	5.24501720244973	0.381249469206736	46.0026565395218	5.24501720244973	3.34313548480253	14.2574346842021	0.617405216429438	29.5051430384767	76.9752578334009	177.792442395923	269.817584487554	0.710807996770544	56.7177448863975	278.378718878245	55.6432992165625	90.7344071409666	35.3799468040164
Female	Mexican American	275	14805400	2017000110490	O	M	67	33	16674467	MFMM	60	1	48	396	804	804	67	396	5.03275253109807	4.21248323153524	-0.15572046969463	-0.0454485725091312	57.7869378763458	146.540810347504	2.45597565961779	3.16509876264815	0.20187393339136	0.445130374721497	0.563398934473367	0.725664405992401	3.59206961580724	6.67250272141895	2.45467677827828	0.264783770248995	13.2073879081437	6.67250325554356	1.32129030622483	6.67250325553448	0.250533489839453	22.5415671054233	47.3878826839295	64.3906994081746	223.066398786698	0.109523854342003	28.7483355067376	88.8550000005526	27.4170589091106	34.9816350212147	13.6888976753989
Female	Other	271	14803301	2016001093356	A	N	22	67	4323223919	MMFFM	NA	1	48	397	271	271	22	397	5.07583530044031	4.06104804762025	-0.157407781497638	-0.0666012331565472	49.5826148941351	149.789963167114	1.99832840491185	2.69148358183587	0.178882888294974	0.427034524191172	0.601798710032158	0.617242102291185	3.02995151165424	5.43201953506969	1.99832835924648	0.255155358866467	13.3377889757881	5.43201666031714	1.25358819872772	5.43201966623349	0.24177780257292	23.8120458516628	42.4874613552622	56.5283448424432	226.765639956966	0.0979787205934555	22.1469697215836	79.9890254813538	22.8782205745355	30.0622240598351	11.328805230717
Female	Non-Hispanic Black	188	13702400	2017001326381	B	N	55	42	5557	FM	10	1	37	398	666	666	55	398	5.08975670726593	4.4304865630173	-0.396754037684668	0.0420706673450326	56.4712989179949	169.326258006453	2.35413966874027	3.13051658034387	0.24143085881288	0.77261404811912	0.510837364279851	0.771212903014811	3.10191611624166	6.39909088216556	2.35413966874178	0.268041449790175	13.3113391751075	6.3988226583963	1.53807121311804	6.39921508266202	0.317529308097711	22.9880834887817	50.15986688588	70.1715743068528	248.604192049685	0.107621153173881	29.0820924697011	100.563965731201	27.9989397079089	37.8361301333717	14.6312247579822
Male	Non-Hispanic Black	189	13902200	2016001402126	B	N	75	17	7566	MF	4	6	39	399	904	904	75	399	5.15779715397067	4.40971269670684	-0.0192745513347076	0.0226283401797239	80.6757589483163	177.758430076666	2.97288438314483	3.97564796723708	0.170802760672116	1.15822172927682	1.17181414811156	1.04052390458144	4.76831920316081	8.08109833207937	2.97288438314483	0.5490272074175	25.9796660675259	2.97288438314483	2.03301105188501	8.08113759680396	0.502485364822515	26.1372002913125	40.6922937494681	98.0161924230036	268.167051156405	0.367745458506283	32.8190655206043	149.293280673699	31.4554442536398	47.8194217850028	19.9307409614219
Male	Non-Hispanic White	80	11209901	2017001230678	W	N	66	13	5466	FM	NA	2	12	400	800	800	66	400	5.16386545267487	4.46729915762937	0.187929257572033	-0.010309533067196	105.133231284722	173.045734288106	3.68084803334009	4.72486385694375	0.191457789200097	0.940650481900244	1.69044610163293	1.39816388575623	6.86228114428386	10.0055632942751	3.68084803334009	0.253734348566057	32.7034527389121	3.68084803334009	2.75162650735705	10.0055818438509	0.693983120869255	27.562230858882	49.8681527444775	116.752631099771	262.816988996874	0.492525126393766	35.4990550876128	181.330311793498	39.952866873188	63.5416999691487	24.1847349269377
Male	Non-Hispanic White	269	14805907	2017000913098	W	N	1	57	5122	MMM	10	2	48	401	13	13	1	401	4.34310939905223	2.30891279007343	-0.224523299290046	0.0183256045722728	8.03968168334524	78.3695143081107	1.41183207195494	0.625082923359323	0.0157330569114307	0.096026802365153	0.0253263403589673	0.083120269737077	0.192489797595446	1.41183207195494	0.588043278736845	0.0104677271235312	0.33997370786982	1.41183207195494	0.179967211325236	1.41183207195494	0.0398652270619442	15.4792634765489	4.4880983718373	8.78424458270069	145.091886778999	0.0345338707711725	3.21312053831624	13.7408432474887	2.89777249973063	4.72869447127775	1.88396009006882
Female	Other	115	11703308	2015000360177	O	N	65	43	6570	FM	3	3	17	402	791	791	65	402	5.03835437646766	4.15667788562904	0.264716348516623	0.00106579883126374	83.2122218392877	154.380475456739	3.72464479185459	4.7173006615073	0.345382485242802	0.937149771710478	1.1678890405611	1.05211966831197	2.22218523440664	10.124630878784	3.72464479185459	0.512082765816605	20.3192073528252	3.72464479185459	1.6611065024832	10.124634255163	0.562963526516554	21.3409818894044	67.0567489744909	101.799299810437	231.958074524648	0.180420457494879	39.7511482908137	151.741821308932	44.9642946928031	56.2683014111343	21.5990358551712
Female	Non-Hispanic White	153	12801800	2017000539965	W	N	61	24	616559	FMF	NA	2	28	403	740	740	61	403	5.10092442111629	4.36653232883306	0.0596033079436638	0.00807401298923195	83.6077013096591	165.50450816363	3.63602545685403	4.51288705846963	0.333147601180305	0.630473354933741	0.612619507612088	1.12630247074762	4.55233348809896	9.88374174824322	3.63602545688724	0.406862508366824	20.3499487029453	3.63602545685403	1.99017977157915	9.88374187070134	0.493374072836053	21.9942563113951	69.832898527074	103.829701998422	244.383896742612	0.166505922535451	48.2708107800173	150.101375556974	45.7386822544313	54.4488273985975	22.2146517450331
Female	Non-Hispanic White	187	13603707	2015000389114	W	N	26	33	266619563019	FMFFFF	NA	1	36	404	319	319	26	404	5.11421331313741	4.30536253382957	-0.127741581955367	-0.0143507753365775	65.2105295379394	163.999362037408	2.75217276186125	3.81186136104192	0.243960480743714	0.692045240541507	0.851097672376272	0.880558542103877	3.45812954958273	7.48118106149359	2.75217276186176	0.326075721811693	18.2567191071272	2.75247758754861	1.87231239077628	7.48118120730898	0.411291100396964	22.6941991584269	53.3676357181077	74.8244731090178	242.715120978026	0.139535492544416	34.059645026255	123.137573344481	33.6405122750571	44.8659057936255	16.6998486211895
Female	Other	154	12401101	2014001129409	O	N	8	41	1740783619	FFFFMM	NA	2	24	405	102	102	8	405	4.87456513886737	3.38199040500274	-0.239239340110742	0.0111856101167216	23.1675146051045	132.389819557124	1.43786780109709	1.70920369297007	0.102704967703877	0.3296644571999	0.198771850683739	0.307129907402851	0.691329850582155	3.49341456161214	1.28515567397096	0.0818642463153864	3.1433230572974	3.49341528955067	0.540785237300492	3.49341528955067	0.152191684689381	17.0093084559621	20.088482602779	33.7440296540378	206.707463173831	0.0566054008525881	14.4653427229717	46.2131593696459	14.2100683720099	17.2150899085955	6.64128167980517
Male	Non-Hispanic White	273	15500102	2014000732517	W	N	58	27	445158	FFM	NA	1	55	406	699	699	58	406	5.17335914297117	4.49133005836348	-0.376062082222121	-0.0627613419924155	61.2686305942741	165.7694223824	2.25634533834448	3.02457528573972	0.113825474519159	0.711694306550054	0.578590373634233	0.68753110844083	4.31672187466156	6.1333336383959	2.25634533834395	0.119536099999544	20.0890653476705	4.57386363774304	1.15717827140164	6.13338253194544	0.362866744219013	26.1539243364415	29.1893781682143	65.1928681119582	254.484350173074	0.319039754262874	19.91508638723	104.659522372598	24.5020686457742	42.5886592548489	14.3551144298626
Male	Non-Hispanic White	179	12800200	2014001073501	W	N	43	11	13184443	FMFM	50	3	28	407	522	522	43	407	5.18107648944953	4.49983205528309	-0.190707212526603	-0.11735510733068	74.3753703059169	158.178063418477	2.79396208338001	3.56775149797995	0.150238258868711	0.853102303690053	0.835573751226771	0.768580699078049	3.93587715835347	7.59471218216577	2.79396208338001	0.441964340271672	25.3626159044214	2.79396209473467	1.96945622510923	7.59477636047956	0.358180944509848	25.6200356648867	33.0109853920815	86.1100580551453	245.692812884803	0.334417815359886	27.8595674527435	137.583726776557	25.9871360187952	47.705633888795	17.161410083978
Female	Other Hispanic	44	10605910	2018HU1298283	W	O	52	30	542552	MMF	NA	2	06	408	624	624	52	408	5.06555926013881	4.31596718737548	0.249897729523667	0.0563159756831658	96.1457161191427	167.649457302695	4.00184369164474	5.09655882119165	0.355468381163773	1.1192225487655	0.79244851026798	1.14363988941702	5.90932379752581	10.8781291813333	4.00184369164474	0.547350480702242	22.8873793987945	4.00184369164474	1.95035591749925	10.878138987042	0.496599444948029	23.0253551931278	78.151375669533	120.580684679508	246.755492508506	0.207823108550105	50.5195748980258	157.414823331853	45.4589980093987	70.6969898632591	24.6869227768464
Female	Non-Hispanic White	152	12700700	2018HU0133597	W	N	69	12	726934	MFF	10	2	27	409	837	837	69	409	5.08284986953597	4.29711474709446	0.0745220058313651	0.00672015312669804	79.1731125301746	162.320053102202	3.44189312150638	4.44168371886489	0.307559342546477	0.923304691963475	1.00234848008275	0.957797027749971	4.71227107327953	9.35603472352723	3.44189312150637	0.460227569383252	18.7239863900667	3.44189312150646	1.85953916591614	9.3560355276564	0.496998936096944	22.0027806602908	71.9774381231664	104.026945764711	240.848722180085	0.1694682489769	44.0355702080213	138.09947986325	40.1541764546703	58.7394210442129	20.7243890048808
Female	Non-Hispanic White	153	12901005	2015001309093	W	N	29	49	282925	FFF	45	2	29	410	350	350	29	410	5.10643815089579	4.30023166449604	0.0508972610588633	0.0826118704285216	77.5659797326968	179.298142589501	3.20330336113538	4.584211080441	0.318738666860288	0.86531113507399	0.737719513443236	1.02933050218584	3.72632867455415	8.70744240624559	3.20330336113538	0.479770842329985	21.4285916457899	3.20330336113538	2.04844100541991	8.70748131557186	0.441433411626702	23.214372161494	68.2303787464277	96.4822320741278	259.505793140838	0.168819542488889	37.628476681957	149.358130171389	38.5999840386557	57.1824133579497	20.7818944850537
Female	Mexican American	271	14804601	2015001470220	W	M	29	38	3129	MF	NA	1	48	411	348	348	29	411	5.06910416295495	4.30058191026229	-0.157552315840533	-0.0149418528711781	62.9933770340528	156.673231771703	2.61523814515596	3.51809543144481	0.218281873393812	0.729084065358895	0.862910083742614	0.8658928054109	4.40007411206936	7.1082748317554	2.614989287563	0.238966119890087	17.4609605902264	3.08410911614623	1.48358320948265	7.10827786198506	0.327480924704028	23.0893442025797	50.7081164809965	70.8673217962312	234.536973078094	0.127238427037691	30.1399193843887	110.362034652236	29.9758564530184	40.2813061025496	15.3327918033897
Male	Non-Hispanic White	104	11207102	2014001004049	W	N	32	21	3132	FM	10	2	12	412	387	387	32	412	5.18042265790528	4.47286417137908	-0.0592128889276219	0.0352712655982377	82.5704016232833	184.139555420989	2.95876132819705	4.23905398305611	0.17398102949334	1.22640551517679	0.977535130910019	1.11634922705834	5.63280533922313	7.89361789925984	2.95876132819705	0.376389287642231	27.0425310890032	2.95876132819705	2.08558990001243	8.0427458268634	0.445964857492781	26.9070842370372	37.5128890575018	91.8427328701568	275.355071399277	0.430864736265442	30.9502156695445	150.09791236709	33.0034766412117	55.423296042401	20.367748419478
Female	Non-Hispanic White	264	15159303	2014000116574	W	N	49	41	16491453	MFMM	NA	3	51	413	592	592	49	413	5.10018603148877	4.32164892880582	0.275286358530668	0.0573955002650443	99.1798915244632	173.743753332216	3.89750072503369	5.24063678163774	0.360024730104468	0.949473137342403	1.21417468033429	1.11101168526006	6.7489202319363	10.5930176264606	3.89750072503365	0.530520345451274	25.7523660445322	3.89750072503365	1.81902940843872	10.5945053972636	0.50818469667525	24.4470488965995	79.6483423942572	108.380926308952	253.452811917303	0.194903910246585	48.5067394185328	169.651063578925	49.6377195790516	65.6070675285871	24.6958129552376
Female	Non-Hispanic White	55	10603722	2018HU1164959	W	N	56	53	5660	FM	20	1	06	414	682	682	56	414	5.09724089359164	4.28419700308554	0.0733784329735554	-0.051545213904962	78.0676248287441	155.352337079307	3.48065014366095	4.46643348324953	0.330239963103325	0.932129847232409	1.20252619808965	0.991804472698199	2.619250716874	9.4527763086744	3.48065014366095	0.324734702686771	19.5542914703007	3.48065014366095	1.54873589747842	9.46138803673694	0.489586946930389	21.4290352682882	69.3614075243647	102.944162589229	233.052388204215	0.142717997612031	40.7440557567122	152.047448818675	38.9802172552072	50.1661092295152	20.2793457120883
Female	Non-Hispanic Black	179	12700900	2015000506564	B	N	62	15	176263937	MFMMF	3	3	27	415	752	752	62	415	5.09694312549145	4.42413061576683	0.016375309746586	0.0489189114011329	84.8178423310728	171.719449386923	3.7464308652356	4.23055951590064	0.379373148546767	1.05707043008347	1.11526954487071	1.01040499496342	3.38939718315266	10.1670659185243	3.7464308652356	0.162325824737424	20.5416735413879	3.7464308652356	1.98580401707804	10.183854942298	0.674403234291744	21.6396390009826	77.4411098613953	108.665901571881	251.234819657696	0.183222098354874	44.9709215199405	162.731814582833	45.1919701978017	59.7460814651812	23.5308470696873
Male	Non-Hispanic White	227	14501101	2018HU0860554	W	N	41	31	334141	FMFM	NA	1	45	416	497	497	41	416	5.19242279861014	4.56764759631127	-0.223271716553135	-0.0316340611708028	77.0439377897811	174.301879820537	2.82313570294029	3.84015407122651	0.154419990314756	0.778296561888245	0.87976718111556	0.692315127411674	5.46038317160816	7.57346451596389	2.82313570294029	0.31124797005489	25.805128374192	2.82313570294029	1.73523055746972	7.67407846659951	0.62415089111125	26.2901999395707	36.2403479773655	91.5323063208344	264.246543434741	0.393479750451086	28.7330229081992	143.326270825205	31.1902776526005	52.2373475597125	18.6500962787295
Male	Non-Hispanic White	171	13200405	2018HU0005496	W	N	31	10	31	M	NA	6	32	417	381	381	31	417	5.17819025204568	4.45170593949479	-0.00989555017700756	-0.0277152325311035	84.928556331862	172.513418096789	3.05571817490785	4.320737638732	0.168786755102784	0.947680792142867	0.468522263042952	0.804637506595654	5.80893624024343	8.30630112002435	3.05571817490785	0.539091258251179	28.2957506117912	3.05571817490785	2.05636137359174	8.30630318773567	0.485241426834899	26.7933210690882	40.1168756807752	91.1545224319255	262.210405411148	0.419066042045341	33.3235690490452	150.239342478126	28.9168245599413	52.4056768394183	20.03102753662
Male	Non-Hispanic White	80	11209908	2016001178497	W	N	68	18	6868	MF	NA	2	12	418	826	826	68	418	5.16620527628944	4.4946383871955	0.0304041393381959	0.00633067115967077	92.299850937918	176.361514402658	3.35729138288786	4.63111979097821	0.19069425015067	1.34672166442934	0.975341258344892	1.0713922910146	4.7151732464713	9.12599462087347	3.35729138288786	0.278650674739768	29.7433501959719	3.35729138288786	2.42361899206115	9.12606415894576	0.678322035187277	26.4923563109151	48.6676609992093	109.172529318869	266.584949192418	0.436811263330309	35.5821486693673	151.256163100033	39.6815422816194	56.9771730309136	22.3750838182826
Female	Non-Hispanic White	79	11100102	2014000800549	W	N	45	30	454524	FMF	5	2	11	419	546	546	45	419	5.093151271727	4.30039312204817	-0.109914314944486	0.0255757672924034	66.0544107110034	167.122493744991	2.72519083569713	3.56121911235143	0.253421370027275	0.538754421727418	0.867903390204315	0.919039007113978	3.36852323133093	7.40536026436713	2.72519083572413	0.227972118631707	17.9691045901209	4.57990613544634	1.92198638033807	7.4078367277135	0.39730034240485	23.2384532657769	56.7752429612389	74.2603354480932	246.173553661225	0.122949138115746	35.5599196360039	115.479854606442	37.9300834050789	40.6208758780794	16.7717478106214
Female	Mexican American	156	13200409	2016000335940	W	M	45	118	3665152326145	FFMFFMF	NA	5	32	420	551	551	45	420	5.05400282185433	4.26597298830466	-0.0577236274978067	-0.00322151126603823	67.2387259664651	156.144414123977	2.89450045254706	3.33889131873598	0.243254279412964	0.616860835442616	0.692962433664124	0.773589284315758	3.16336324738609	7.86790765213244	2.89444155317142	0.395218106316823	19.1387816120856	2.89444155317142	2.01221463880004	7.86790787751885	0.402877134869211	22.2302932124478	59.7773650301196	80.0690074499934	233.942999439843	0.136287716505867	34.3059277574772	117.576586901671	37.0993710494304	45.4019878383184	16.928358466306
Female	Non-Hispanic Black	191	13604008	2016000593654	B	N	39	120	53532313390	FMFFFF	NA	2	36	421	476	476	39	421	5.09119573185373	4.44268264076327	-0.0167709538725039	0.015721719039935	83.5889794709413	165.160454170108	3.4877438384948	4.55090771354426	0.310359767736089	0.759585139565092	1.4507652831828	1.18956223486282	2.3440613977377	9.4692809400875	3.4877438384948	0.478222302099405	23.233775766203	3.4877438384948	2.19316493742124	9.48067069843309	0.475411374644454	22.9664904711052	73.4113358786035	101.601793590632	244.002775145568	0.179675588479034	43.2761402644087	147.925829039213	44.374526347911	49.4434236633959	21.2754793897396
Female	Non-Hispanic White	155	12702100	2018HU0959787	W	N	39	4	35339	MMF	50	2	27	422	478	478	39	422	5.10261034036929	4.3056233464696	0.180625879167347	-0.0126864344784261	88.787797555203	162.377505611736	3.54676104299547	4.55346073150852	0.346712070163774	0.961562018084089	0.98685595889007	1.05963557555049	5.70052097765117	9.64081829100534	3.54676104275003	0.548474616015569	23.6140505106296	3.54676104275002	2.165941350711	9.64109605933109	0.580897456719339	24.0334873099769	70.7271676972072	112.054762110998	240.912654906465	0.164121053029943	44.8275444854095	144.646505852905	42.3686335974881	58.2148479542259	21.3614904781932
Male	Non-Hispanic White	156	13100200	2016001473805	W	N	37	83	37130	MMF	NA	4	31	423	452	452	37	423	5.18700188911864	4.5298985611755	-0.0251449314974651	0.0219134318001392	90.4460580792318	182.895567567675	3.22482400920397	4.55556001522776	0.195521558042045	0.958532910859312	1.05496390112165	1.29114986011158	6.35152600915654	8.76597887917425	3.22482400920397	0.229532570598981	29.2747767253853	3.22482400920397	2.02123154978209	8.76598050345188	0.373394436811724	27.0468198639956	44.110501053211	104.257827237076	273.958731919197	0.428832835014995	35.7814784517971	158.189965286789	33.1827815486702	61.1248714713029	22.0867174056025
Male	Non-Hispanic White	116	11703410	2018HU0608342	W	N	28	14	2628	FM	10	2	17	424	343	343	28	424	5.20165164908212	4.47841534167323	-0.00927541569237121	0.0194925341564813	87.2816220663961	185.145903764305	3.1243383288042	4.4365163516788	0.183399590707569	1.37625720963903	0.928007101111263	0.637814793236551	5.59182379052036	8.49271541364246	3.1243383288042	0.470603582332707	28.7642786188699	3.1243383288042	1.91038318434824	8.49283210382249	0.68286310182453	26.9360340913534	39.3361033617629	102.84164485498	276.482942519117	0.446977250425513	34.316102116483	164.318842159181	37.9730777239304	57.9811890784856	21.5956563643261
Male	Non-Hispanic White	12	10500600	2015000874791	W	N	20	41	60561420	MFFM	20	6	05	425	251	251	20	425	5.17169748373001	4.33038227146495	-0.0448062880402394	0.023547013427123	72.6443766287677	180.412247686702	2.6724219238632	4.21746544114254	0.150169751774527	1.15618648031431	0.752051278803623	0.788365763413807	4.93651449764711	7.25879182189782	2.6724219238632	0.321593106880903	23.8268040530762	2.6724219238632	1.80331997396791	7.26439595357654	0.354618847659157	26.1829743574901	35.8537658833247	88.9274083978719	271.164151824137	0.35124986662837	29.8265944418562	130.335672844282	28.2858253842631	46.9310630087331	18.1166256075148
Female	Non-Hispanic White	250	14202701	2018HU0230614	W	N	9	17	9124342	FMMF	NA	1	42	426	110	110	9	426	4.91735184435005	3.5197833722107	-0.270084112716706	-0.0123382664925582	25.782584883501	134.96474252641	2.16078596394073	1.73969393297839	0.109731447989833	0.297398084876965	0.251833949910613	0.328820054443334	1.35066923344004	3.63878129853785	1.34311298516887	0.0656163667888099	3.54625329598262	3.65095962115137	0.547315281614608	3.65095962115137	0.129974533132104	18.1961349452711	23.7501179749957	35.1882093226961	209.715467222661	0.0579390597840527	14.427454368619	48.5570401134311	14.7048075112016	18.4229195012064	7.04178918043674
Female	Non-Hispanic White	190	13401902	2018HU0585410	W	N	9	47	4691244	MFFF	NA	1	34	427	109	109	9	427	4.91356217759273	3.50810018287935	0.0350890868959647	-0.0382462691092707	34.5770189701073	131.015535593111	1.79403003813617	2.50000690740719	0.152648085565113	0.397678254811185	0.431843935816661	0.44771410533828	1.46743311770904	4.87628599293334	1.79389964680368	0.120556062938178	4.75106403713588	4.87631122907491	1.16843024299341	4.87631122907491	0.213615671889909	18.2748314890913	34.2416720937537	40.4571667425761	205.096057378022	0.0734996193964621	18.6062596546101	65.6100005016852	17.3622067839438	24.560640573484	9.1980180013048
Male	Non-Hispanic White	190	13500400	2015000738268	W	N	6	55	4242865	MFFMF	NA	2	35	428	82	82	6	428	4.80229634605298	3.17281944380795	-0.120319450178722	-0.0297580182621074	21.1681986892128	118.218939854449	1.14733996959851	1.76549038830239	0.0431496703630724	0.35690350880374	0.182123162639597	0.20220401776626	0.660914128457002	3.11849949529199	1.14733987441237	0.0304767874534512	3.19686519669195	3.11879313167574	0.642304120129284	3.11879313167574	0.130959961957311	17.4348086015081	11.9659328481744	29.3982943557512	197.491340293602	0.10763617130636	9.13491300248952	40.2266905998618	8.92480505069255	15.1611602173095	5.6647422392391
Male	Non-Hispanic White	152	12700800	2017001271037	W	N	55	95	5655	FM	NA	4	27	429	667	667	55	429	5.1779679157514	4.47072121340592	-0.0776096136581348	-0.000481193712852976	80.8917304754626	177.236805403145	2.94325682448906	4.20085968526997	0.16565727535175	0.778982617616524	1.05775661136851	0.653344848720879	6.09366816351084	8.00047797415288	2.94325682448906	0.265627731967032	26.4933341306831	2.94325682448906	1.99094869237948	8.00060152008464	0.22744245136891	26.4837485476672	36.9470549170984	88.1743754610372	267.576640662689	0.39095652476575	29.3196498121116	151.105274664193	32.9240728846869	50.4932525325922	19.6886693426079
Female	Non-Hispanic White	188	13703106	2016000888470	W	N	44	30	4453	FM	25	2	37	430	535	535	44	430	5.10535799780929	4.30165967801855	-0.142045524657456	0.00561968157105414	64.0468055870867	165.832406568016	2.51989647599764	3.40615929062905	0.239864158036878	0.48132627319461	0.560033561182815	0.835812835208658	4.12239323426793	6.84978877201332	2.51989647571707	0.44568602058631	16.6608289821659	6.66043178958376	1.4101837334449	6.84978879952979	0.379426684872452	24.4164431770766	52.4893647036717	77.9764491854834	244.746937885901	0.133251490179039	30.5007021319544	119.439007659633	30.6494673345781	37.3731837523398	15.4184236555084
Male	Non-Hispanic White	255	15311703	2018HU0822663	W	N	70	26	70	M	15	2	53	431	851	851	70	431	5.15890102051547	4.47416763528921	-0.292199680385801	-0.0346619441340868	65.4946169243887	168.046222649889	2.53049753258667	3.42597065853432	0.13365520037829	0.63990327999024	0.76783746914915	0.856773327072002	4.23520786606378	6.87855826591325	2.53049753258667	0.213481899717359	21.8858175620822	2.53049753258667	1.27110355390778	6.87860525101469	0.396216033549605	24.8821105656009	30.9987169339022	75.7819668269124	257.101332793464	0.342610179962344	25.6701440834348	123.921478316002	24.0146902895164	43.8394892735954	16.2648572064651
Male	Non-Hispanic White	219	14702002	2018HU0116703	W	N	62	29	62	M	10	2	47	432	747	747	62	432	5.16971770889514	4.50380182022798	0.25938198013181	0.0434344238252174	117.118213950811	183.672105527791	3.92270056019153	5.91005638105306	0.21242014744969	1.76444040249225	1.01564544268275	1.06124864242939	9.78759966319447	10.6538019534439	3.92270056019153	0.568825983153713	34.7283446341666	3.92270056019153	2.6223510411665	10.6630056510895	0.846946644469516	28.8565266845381	53.6405343432591	128.127156914999	274.83065018454	0.502481779830033	42.1889802644489	197.497078324883	45.8627670833779	68.2095530693653	26.9519586359174
Female	Non-Hispanic White	261	15311503	2016000833579	W	N	67	23	6667	MF	7	2	53	433	805	805	67	433	5.08764858143708	4.30196551533232	0.361463051504505	0.0460554927148578	105.998884114698	169.64433088739	4.35817458880351	5.00305997959437	0.431307364850803	1.28715096712012	1.20781157630719	1.25674689533833	6.02221250592881	11.846733634598	4.35817458882117	0.549101667037557	23.8545106631677	4.35817458880351	2.92820529999149	11.8467467899965	0.620401185596115	23.321853554701	85.8291077634691	117.616797178431	248.954354953164	0.218102962261445	54.414912487453	193.976123970645	53.8182361243767	67.768218306441	27.1246635882212
Female	Non-Hispanic White	119	11800200	2015000540515	W	N	58	65	705817	MFM	NA	4	18	434	697	697	58	434	5.08830479318211	4.30337440037633	0.140674088628039	0.0569870270359533	85.1188477733458	171.621560005275	3.5985675562414	4.41827220228702	0.392399217167967	0.952684243876024	1.1929497607988	1.11099957181394	4.76671999615123	9.76591743064585	3.59856755614179	0.458871558217747	20.5657080713275	3.59856755614179	2.34697345268497	9.78192077255223	0.574782842529078	22.6535361488687	78.6890547864415	101.477175834159	251.127398916704	0.187976986327851	44.1298576482171	145.309587517467	47.9370860871064	62.9598904981073	22.5924727549982
Female	Non-Hispanic White	8	10400134	2017001261492	W	N	69	12	6970	FM	35	4	04	435	832	832	69	435	5.07865925799617	4.27219701610996	-0.316862992229353	0.0184928872822972	52.2131314647858	163.555461237325	2.39551126764095	2.93326526446436	0.21689920718085	0.589120642953847	0.499671253145317	0.654146722027384	3.5312201293724	6.51167461453593	2.39551122661431	0.374898207566859	12.9644618283328	2.62768487195113	1.43692842574669	6.51167463690383	0.296326237820006	20.7962374321902	52.3026947015058	70.590637235329	242.222232181823	0.106199968189761	28.2293423870435	98.6022198938805	29.6021623260081	38.456753183854	14.506151912629
Male	Non-Hispanic White	226	14203303	2014000671114	W	N	4	15	382841	MFMM	25	1	42	436	54	54	4	436	4.66698271592798	2.89637169889729	0.210437769706121	0.0110496438385979	22.3496233507785	107.558228325629	1.25519948032705	1.78185690733862	0.0460667286000167	0.2394468867898	0.166813036857964	0.24248604925097	0.372371350231139	3.4119859323278	1.25526956696337	0.0478870364647732	3.42138705303299	3.41198593264447	0.566279298603224	3.41198593264447	0.119950416327491	16.7857572013393	11.4895111639854	28.706944749719	183.977829913132	0.112573388189055	9.79576844778873	43.4500129135256	9.79142119612342	13.7812031949366	5.77322190261924
Female	Other Hispanic	239	14500102	2015001441908	W	O	19	24	192014	FMMF	10	1	45	437	230	230	19	437	5.0772737273699	4.16253724627574	0.286937947328543	0.0412202439717318	85.5820182240415	167.08354743221	3.35645426911878	4.12572640885926	0.303030746862674	0.840737621694074	0.906014911565908	1.08860802364023	7.73539069896339	9.12214351882727	3.35645426911881	0.383916194064542	22.3281383219084	3.35645426911878	2.15293556484252	9.12378864660694	0.544920359620549	24.4977459432244	72.5418358729938	100.722530916863	246.130526098099	0.163226555701691	41.6354388585813	137.112287317052	44.8101870284135	58.124621380677	20.6531463770604
Male	Mexican American	128	11703411	2017001179718	O	M	60	51	506019	FMF	45	1	17	438	728	728	60	438	5.1267497969594	4.41174140302901	-0.0220987352559404	-0.0562854351441984	80.6116087077079	159.248258987063	3.02173708831975	4.12340270770638	0.159121091912718	0.927499326711884	0.972774870309328	1.00455415483298	4.04385801189154	8.21393272745345	3.02173708831972	0.457376643365439	26.4927893427954	3.02173708831972	2.01084912845811	8.21393301743371	0.455976205841755	25.6772410542617	38.623250621718	90.2924928595779	246.938486297964	0.377877864943719	30.9559351171964	144.268896681584	29.6920547811174	44.2165152348558	18.6545795645022
Female	Other	194	13703101	2015000042146	A	N	93	71	93	F	15	2	37	439	1124	1124	93	439	5.75699606734098	4.32724131212017	-0.0759400238075775	-0.00292124115251647	70.1966990827234	225	3.03522238941933	3.65526769965926	0.370616463964003	0.819399536391267	1.26412871586504	0.971610787491549	6.50118544689823	8.15730775156453	3.03522238941933	0.27444849564157	15.0090576346013	3.03522238941933	2.16004692026659	8.25058986649016	0.608208348409542	22.1273659971099	83.3516826431923	99.1511887028097	307.682009285733	0.206688374798249	49.73192555	162.371900754228	46.9634666743193	62.6148061974853	23.3470830851395
Male	Non-Hispanic White	264	15310502	2017000377484	W	N	3	15	1438527231	MMFFFF	5	1	53	440	46	46	3	440	4.62222308010475	2.81535169052978	-0.327833193376382	-0.0820086459545732	12.0313831345228	93.7108927807761	1.81203631882809	0.980201806943656	0.0227975899389318	0.0859733603499347	0.0300992769639814	0.109254180285333	0.361994699386478	1.81203652954961	0.676178021313758	0.00678231404601489	1.84448850529192	1.81203653032563	0.26020915854276	1.81203653032563	0.028306460151794	18.0485821331233	5.14301612547928	12.9643858586987	165.911052516374	0.0539539015977073	4.15200845115185	20.5433886173407	4.29226826136297	7.3023630821454	2.76495325831308
Male	Non-Hispanic White	130	11600300	2015000138978	W	N	6	135	376810363	MMFMFM	NA	1	16	441	83	83	6	441	4.80611306184923	3.18217313908675	0.105075423456893	0.00571532238940786	26.7691087079926	122.956223342621	1.79249135981065	2.10880205611787	0.0559274395555753	0.273647689948156	0.16227865828357	0.367810175489202	1.29345799501711	3.79901197556194	1.39757842261043	0.0521748496742954	3.8891737699636	3.79901202990159	0.654751729651915	3.79901202990159	0.167970503927099	18.1538731034392	14.3594231297543	35.9731638039988	203.397517617118	0.150581401707501	11.4353755396264	53.9391575061336	11.6643151514625	17.3479601079115	7.10659954561804
Female	Mexican American	259	14805100	2018HU0383997	W	M	44	8	6044	MF	NA	2	48	442	529	529	44	442	5.05771258125257	4.31283006565414	-0.000966373509250378	-0.00156261373444856	74.5793524540718	156.984954181652	3.09150706327255	4.26719371127522	0.27394433017197	0.58549792474959	0.952987942241549	0.866781318417512	4.27170915583312	8.40207099089258	3.09150699634323	0.302926994794266	20.6512958930823	3.33480176549796	1.73344374816495	8.40358729067922	0.422148607284178	23.1239474930382	64.3416358182591	82.9498877349548	234.886868183776	0.155542320812455	34.7085659190386	126.926212062175	37.814851359001	49.8880323615277	18.1538599084647
Male	Mexican American	200	13604111	2015000619158	O	M	47	8	475020	MFF	30	1	36	443	567	567	47	443	5.13690041930575	4.45736596309048	0.00802695223678485	-0.000899016687269721	86.9551888549396	170.034507648411	3.06956306391996	4.35867976248159	0.163205562464956	0.837167640363242	0.952116737363173	0.858606284074813	7.20046342421859	8.34393674588441	3.06956306391996	0.621643885513128	28.2777975352281	3.06956306391996	1.78409923772831	8.34393749579565	0.390303799654376	27.328197546101	42.6514290803454	92.751457992811	259.379448812463	0.412643623764369	30.3608742376951	133.628196959856	31.2840393657225	55.6555339887963	19.9045393903664
Male	Non-Hispanic White	156	13200413	2016000657836	W	N	35	5	2835339	FMFM	35	3	32	444	424	424	35	444	5.18285440904611	4.49438015373829	0.216409993324614	0.0365589016165234	111.13994211954	184.82571697813	3.79388535256284	5.11581636527239	0.215633548876663	1.54219074611524	1.46841612512949	1.58678795916435	7.19841334319319	10.3093270536307	3.79388535256284	0.569410854523608	34.5568567124396	3.79388535256284	2.52103047002747	10.3128496082861	0.750014593505709	28.2944914754641	55.2703341825869	111.995135177801	276.124257826355	0.578443033082527	43.9264872551577	197.653593363231	39.5975329583965	69.5133451185423	26.1895944313674
Female	Non-Hispanic White	80	11208619	2015000036984	W	N	46	32	4678	FM	20	3	12	445	561	561	46	445	5.1093271467716	4.32922024411321	-0.183980303757226	0.00951349800124567	63.1327681834426	167.141480900314	2.59314895227367	3.1774713587694	0.255203825661936	0.551831060027264	0.745045406016197	0.981956217873681	4.23409664127852	7.04319914594309	2.59314895227367	0.211540638152281	17.0309280588959	4.55681733638494	1.49775746000097	7.04890964048188	0.324068968691038	23.3459860368175	57.5177780397975	79.1895518715355	246.194529603863	0.125458520552678	28.0333784550692	107.004015129769	32.9401411787368	39.5001655758501	15.9604771624441
Male	Mexican American	223	14400102	2018HU0287525	W	M	60	30	6560	FM	NA	2	44	446	720	720	60	446	5.13759461027566	4.41395726146368	-0.188664708403711	-0.0169594096660175	68.3945096450745	167.441694915273	2.60404299910228	3.29023854991253	0.137476580944268	0.642130176909691	0.610822081414163	0.65875900033846	5.05724454199175	7.07776792243687	2.60404299910228	0.305053324725555	22.9597548248847	2.60404299910228	1.57597120917197	7.07852264302127	0.213791324054492	25.264738972687	33.287398177937	82.9645545662172	256.407350153074	0.304801384003554	28.2042279763804	131.914922625101	27.896253473316	42.1035169326277	16.692394127112
Male	Non-Hispanic White	84	11303101	2014000668834	W	N	37	66	8345379	MFMMM	NA	4	13	447	445	445	37	447	5.18750724843358	4.52259348708457	-0.347764180463331	-0.0547369860572646	65.0287387384853	169.485988955826	2.44964765324602	3.49334622123911	0.126957186606496	0.93932908914212	0.676506364056219	0.607119454862401	4.03529211106988	6.65883183636007	2.44964765324602	0.362615386111333	22.3631184326763	2.44964765324602	1.31806842361031	6.65883268915997	0.503148560125885	25.5461600782937	32.9387341480489	78.7192310703869	258.751641288726	0.318008097979044	25.074941175658	126.666172076411	25.5467083762919	42.1300067298556	15.8462587714121
Female	Non-Hispanic Black	166	12501400	2015001395740	B	N	43	47	8351543	FMFF	12	1	25	448	518	518	43	448	5.11075447517995	4.43750723721144	-0.0126665259498983	-0.0646704157860278	83.4995056317583	155.412684492599	3.38309644264329	4.59934242761438	0.302094862446361	0.778160049507205	0.862931729358156	1.05370554124492	5.94123890014713	9.19165320810058	3.38309644264329	0.579128005113311	22.3369617330317	3.38309644264329	1.3673389131462	9.19620955163048	0.481471557976755	23.6813849523362	63.7302541977193	93.8459639515857	233.120282705781	0.164101332997614	40.6558099183855	125.303882293415	38.8184207661437	49.00844177556	19.7167099782482
Female	Non-Hispanic Black	47	10605917	2017000794741	B	N	26	81	337265456106	MFMFMFMF	55	0	06	449	315	315	26	449	5.11235287919769	4.41019537163855	-0.178242485995638	-0.0205589047093229	68.8515601909161	162.681446792773	2.92787334596833	3.80082863447919	0.248264988507148	0.424329891747972	0.737259004594602	0.807163558276312	4.23720576990322	7.9587666329037	2.92787334597667	0.374263927581629	19.2850566941588	2.92787334596833	1.36657536446503	7.95878491195879	0.466900976626109	22.5158943216326	66.3319304295325	84.4004463648719	241.250784366028	0.133303681868258	35.1232487852313	125.093127451463	35.2499498160302	46.4314164733637	17.6587935309812
Female	Non-Hispanic White	156	13100400	2017000997069	W	N	44	22	445112	FMM	NA	2	31	450	539	539	44	450	5.10073763097216	4.30044647273559	0.304342788810419	-0.0266332723935235	99.9619148100418	159.828978401564	4.02093834804402	5.46235547437573	0.375450685240064	0.6920696391505	1.50188874184054	1.27954026746129	3.7173703502567	10.9187606998253	4.02093834805049	0.434841557997444	26.8598386824889	4.02093834804402	2.26091417629359	10.9300436393952	0.553874763164513	23.8603450631538	81.2647210084321	112.851999459215	238.071197843944	0.189420288745995	46.3934715439648	148.403887218815	45.2457327835161	59.2465271495332	23.9317402243872
Male	Non-Hispanic White	119	11800101	2014000383418	W	N	0	34	2730010	FMMFM	NA	2	18	451	1	1	0	451	4.06547819525834	1.77890910292489	-0.0419146725295287	-0.0124197426629165	5.68024536802151	57.5732731725123	1.00352413316879	0.152947916298487	0.00883939205308039	0.067954957556673	0.018478254913284	0.0387546067902568	0.0891555053237431	1.00352413316861	0.930166981826201	0.0040229333393658	0.133107932371856	1.00352413316879	0.099370340593621	1.00352413316879	0.0247905592874024	15.3862844497079	2.11701069612142	5.23285644331632	115.132637161493	0.0205859567500672	1.63200839467218	7.62209597980781	1.73577625259545	2.80538460970367	1.06260486585032
Male	Mexican American	254	14805911	2017001134251	O	M	25	37	25	M	40	3	48	452	300	300	25	452	5.14081574392251	4.44140880827655	-0.174716684329608	-0.00367873786213693	71.285441778823	170.227709099892	2.65594861622438	3.79105447923792	0.149497499532805	0.943487660511924	0.631580375718455	0.843369443807102	4.92378025829991	7.21606204520081	2.65594861622438	0.317802101953769	24.103000986512	2.65594861622438	1.43554466696174	7.21961686006688	0.188318824999988	25.8399175132237	35.5343535546902	79.7397104338027	259.600457061872	0.354795342141479	27.7249505702593	136.656456987885	28.4398987859897	45.8230583337589	17.2371368676174
Female	Non-Hispanic White	154	12200600	2014000310897	W	N	37	19	7381137	FMMF	NA	1	22	453	448	448	37	453	5.11095687604153	4.31997193650356	-0.423229412206354	-0.0790569562785076	49.2417836518865	153.223849344516	2.18284782203895	2.83750040458293	0.199356772114097	0.321661680392441	0.543624550680966	0.581135901670132	3.11627132139244	5.92063666430748	2.17808138786809	0.253240037719804	14.5485128533216	2.18194608607569	0.940887697402728	5.92063905557664	0.296487237711854	21.6078712767337	44.0446514550715	58.6722305149454	230.653469099911	0.104167220241035	25.3059397596908	82.1777588149005	24.3998518680228	31.4224123937253	12.5595507023431
Female	Non-Hispanic White	44	10606507	2016000677598	W	N	68	90	7168	MF	NA	2	06	454	826	826	68	454	5.07236816237289	4.25303650949856	-0.0805689297627451	0.00753219790813278	64.8753398323433	160.758037244918	2.91841561977718	3.35425921532914	0.26889897707272	1.07853885729446	1.00364571324759	0.691513912261668	3.80870329747702	7.92938856714951	2.91841562070024	0.334895778961175	15.8103781889036	2.91841561977718	1.74277496545281	7.93307614673525	0.346943092488647	21.2296438494585	60.3658705531172	89.435306657887	239.108346254472	0.153304313762035	34.8373025128305	123.59880328608	33.881269660397	47.5664372709477	17.4454383132035
Female	Non-Hispanic White	271	14801903	2015000059703	W	N	36	10	3639	FM	NA	1	48	455	442	442	36	455	5.10791958337885	4.30365070062278	0.0820341536931233	-0.0600524609685351	80.2931935275489	155.690042302339	3.30342442985576	4.28970961115877	0.284430739129972	0.760530806739467	0.916794392682004	0.860256849947311	4.73882961375373	8.97919009755288	3.30342442985315	0.53616419110613	21.7291687061752	3.30350985100207	2.06271030091304	8.97963859919311	0.475589117291915	23.3060482334456	66.4395437073366	88.0456170244747	233.432242366538	0.153985961940541	38.9097634938751	113.456686289901	39.7535300630442	53.5353212597571	19.2781443037245
Female	Non-Hispanic White	131	11703525	2018HU1077370	W	N	54	38	541757	FFM	30	2	17	456	653	653	54	456	5.09373630854914	4.34923667859894	0.544136441473834	-0.00846280772591283	133.40279964065	161.624137527857	4.99709725993451	5.92918310933835	0.476441161848158	1.76189642740248	1.42299871025465	1.70424138651948	11.1669732282771	13.5834527295245	4.99709725995617	0.675550720363124	28.000702067359	4.99709725993451	3.04593432055862	13.5835186744029	0.732060131103527	25.6960582717172	96.7237307921237	147.400054303472	240.073862455098	0.234743264296903	61.1567438374201	186.423927903467	64.6268678943511	80.4412289173867	29.9918110064066
Male	Non-Hispanic White	148	12101706	2014001206366	W	N	2	11	4914352	FFFFM	NA	0	21	457	32	32	2	457	4.53966955728745	2.6743482289058	-0.127476962826003	-0.0112818243815099	12.7670963815311	92.6091300001645	1.91085913041323	0.971276938034309	0.0237200564850177	0.130456711729684	0.0501879850753342	0.148553519609957	0.352752481145551	1.91085913040748	0.765586257585498	0.00793819892386249	1.93759832480878	1.91085913041323	0.244660662336903	1.91085913041323	0.0691116210059548	18.1617606152874	5.68681440134262	14.8343203939106	164.44592464508	0.0560091468854856	4.87664550218944	21.2376954201211	4.58858241253316	7.08988077760537	2.88999647937013
Male	Non-Hispanic White	132	11803300	2018HU1106009	W	N	15	30	505215	MFM	45	0	18	458	183	183	15	458	5.1581249157031	4.19695083591377	-0.0366363289794512	-0.0918040629817807	64.0916767072236	158.589777531819	2.74452458170908	4.05095903402125	0.137606360873022	0.986998969138948	0.651937726351873	0.735198792521669	3.71550612065954	6.6041419024827	2.74452458170908	0.211157899254509	18.7290580311723	2.74452458170908	1.19807564167251	7.4603912776077	0.365191060952662	22.3525606344951	32.6601129529889	81.6892672680971	246.172283554899	0.329395971043008	22.6507877609802	127.755692127115	29.0950889380389	44.9938414048527	16.8906470887969
Female	Non-Hispanic White	239	14501203	2014000132103	W	N	4	33	283045	FMFF	20	1	45	459	59	59	4	459	4.68408936574749	2.925486809478	0.3404884418358	0.00423167341315604	26.2056556326603	108.670572919084	1.46400279078152	1.94225698078199	0.0993156604677354	0.163100636472894	0.182086052946413	0.322448499302626	1.25186131648357	3.97922939867265	1.47998398291109	0.0722231289255535	3.36506512168694	3.9795721742497	0.506460627272382	3.9795721742497	0.151295291416768	16.8999924268607	22.0419379309936	29.6581683632735	178.25806255136	0.0552547555431541	12.3412226253909	44.7773638376429	13.8104168795928	17.4285168664106	6.52425751202551
Female	Other	225	14702800	2016001021212	A	N	61	18	6161	MF	NA	3	47	460	741	741	61	460	5.06020695039742	4.2430279061257	0.0145060248932217	0.0551904395384014	70.6355762889672	166.566959866528	3.19506604329147	4.10575301841799	0.324776672736357	0.630475581909974	0.949683553952957	0.71960165062724	2.46802772905358	8.68508953573199	3.19506604329515	0.26366825046419	17.7213987587261	3.19506604329147	2.17295775183367	8.68508996620371	0.521579077427351	21.1077046082591	64.0481592837268	97.8588545444849	245.559566954892	0.159105506188254	41.6992055229532	142.496730655482	41.419208165527	54.0443932594486	19.6144758495734
Male	Non-Hispanic Black	127	11600400	2014001147551	B	N	46	9	4652	MF	NA	0	16	461	558	558	46	461	5.18097864659811	4.51584553176965	-0.0391452132068362	-0.0357510794776792	87.9440061812544	171.610533142683	3.17192618811823	4.424935033509	0.188842848113072	1.08725885956659	0.699139208678698	0.881331591331118	5.40269004197941	8.62218835856098	3.17192618811823	0.367931337492676	29.514135439185	3.17192618811823	1.89298956054006	8.62218931837509	0.441930705615275	26.7257416993767	42.1329553791068	104.510049462372	261.180480955609	0.429084222109307	33.7813288764811	153.947533854914	33.3025497771788	50.549168923844	20.7111301842102
Male	Non-Hispanic White	228	14702003	2017000008745	W	N	8	17	262778	MFFM	NA	2	47	462	96	96	8	462	4.86301981675281	3.34152809213517	-0.156397082599159	0.0258800220027293	24.1704547584924	132.807384112797	2.33060065498601	1.86898932211741	0.0529010766344577	0.337857290036831	0.170967002791501	0.280303336931322	0.894205205544601	3.33670876031027	1.22750661279344	0.0402202456571681	3.57686689857077	3.3367089198697	0.65417288705294	3.3367089198697	0.102656993119356	18.6897857498622	13.2906691480393	28.5268725188169	215.501068978529	0.133028299461731	11.4677836201944	50.8180242220912	10.768050111019	17.0281612223675	6.61322468087997
Male	Non-Hispanic White	186	14000300	2014000148123	W	N	13	21	3211913	FFMM	10	4	40	463	162	162	13	463	5.09636335612677	4.03395328595792	0.00113046131957342	0.0627522098494906	56.547655752245	174.010486732539	2.59001984850286	3.91390215922731	0.145172673273766	1.2137222708293	0.812926262192344	0.595692532600187	3.99075216456355	7.03658258661321	2.59001984850287	0.151340021777613	12.4547655528489	2.61526718109288	1.53465477592955	7.04040388952385	0.388815249386757	20.8329044022315	36.0039598127567	81.5926210675629	263.915154073167	0.358898864616624	27.4253584358838	129.344424817892	26.7527403876485	41.1476621095369	17.0886371842549
Male	Non-Hispanic Black	131	11703407	2014000115390	B	N	13	34	3213738	FMFM	NA	1	17	464	163	163	13	464	5.11141243262951	4.07652586195499	0.328070626472266	-0.0162909513044667	81.8261183950175	163.223672047991	3.55809544143906	5.20606986923559	0.158810148089662	1.06306791053844	1.4392874106359	0.995466969065411	6.34660855808912	8.76477486016125	3.55809544143906	0.308857278790841	17.167549071216	3.55809544143906	2.08184521819512	9.67190618238528	0.705671626816349	21.9971679348554	41.0792756124855	110.470576096241	251.547566260118	0.43962914227547	34.9511134189301	162.575871889561	36.3504235755315	55.933059141425	22.3757562203803
Female	Mexican American	190	13602802	2016001418738	O	M	14	29	21621441197171445	MFFFMFMFM	NA	1	36	465	175	175	14	465	5.06561190549197	4.12777200514399	0.344108277241291	0.0943517803449378	87.5211328409717	174.1581310835	3.77228716165248	5.43060252639633	0.387561174181407	0.679012882365624	0.871635740941134	1.1337592362566	4.48996039063955	9.69312882940917	3.77228716165248	0.559724826635203	21.2174838417184	3.77228716165248	1.76931484385322	10.2541396283221	0.428382521546992	22.2010791041243	83.4712533037137	113.970904436836	253.906039406473	0.19167305652708	52.2012062812264	158.77109682335	46.5434148924222	64.4927282170106	23.9451623179766
Male	Non-Hispanic White	261	15310502	2018HU0522145	W	N	21	26	212021212121	MMMMMM	50	2	53	466	261	261	21	466	5.19194062814229	4.36695733363109	0.196153817011944	-0.0321140831254685	95.8813175035	174.134248532254	3.43593403429194	5.1423482374569	0.202140610610837	0.916116323721116	0.928478981292625	1.01600498200081	5.30668382079642	9.33982773006342	3.43593403429194	0.791083905484995	30.8828375803317	3.43593403429194	2.30190338652214	9.33983704729008	0.48655030379892	26.9054593442621	46.5495358898836	122.206106610852	264.055920207771	0.449754550190524	33.9327639097051	181.5667405747	33.9920561082959	53.8262416130121	22.6819680799539
Female	Mexican American	202	13603709	2016001101894	B	M	50	45	64131850	MMMF	60	1	36	467	605	605	50	467	5.05305350584202	4.33871453358943	0.0331248871413882	-0.00144024196537485	79.1891599972027	156.274373035141	3.43321282798121	4.5510208391214	0.311375533981727	0.960894577035097	0.991492223550411	1.10432626243572	3.10604125410175	9.3322558661588	3.43321282800255	0.623114369564454	20.1234253285141	3.43321282798121	1.7760230910112	9.33244004267772	0.465857019949906	22.0656134544876	61.5488316342659	108.498844820746	234.089017225851	0.181247728650244	40.8096722196872	126.759451145414	40.7919774288828	54.8944361242421	20.0919354207326
Male	Non-Hispanic Black	151	12200700	2018HU0808575	B	N	19	28	654219	MFM	NA	2	22	468	233	233	19	468	5.18051704385973	4.42070029581035	0.31203420915539	0.132088897886787	113.60579359763	202.878228966295	3.80782422495115	5.93462208060361	0.236056598699174	1.34617132287709	1.2435152672461	1.18184263949132	9.36259814662728	10.3505096946444	3.80782422495115	0.587901320912965	34.4701787934978	3.80782422495115	2.31480026487656	10.3507393795144	0.663789219909801	28.8348313593934	54.1121642389293	138.088121405872	296.114275954169	0.548246399660701	40.0644745295771	220.591777649213	47.1552668219115	72.4441561503933	28.1887778333039
Male	Non-Hispanic White	82	10900906	2016001465349	W	N	46	42	1546375	FMFM	NA	1	09	469	556	556	46	469	5.18264246847115	4.52363134238743	0.516594746776973	0.027578457833946	154.50494297078	183.134512956076	4.93850234418283	7.21165209969418	0.284245717709766	1.04244582799149	1.44696971333168	1.48417483238091	10.4125550179429	13.2154689199337	4.93850234418283	0.52389196009763	45.6896365567388	4.93850234418283	3.47214316342129	13.4242411448741	0.681426556627686	30.2857891325646	72.4125935129629	149.33147236752	274.227124800465	0.713449683049101	52.6071753868966	239.613038764183	55.7145241117321	96.9384060158524	33.8567824666403
Male	Non-Hispanic White	190	13501200	2017000804814	W	N	55	28	16397102055	MFMMFM	NA	1	35	470	669	669	55	470	5.18021380729698	4.46890200017127	-0.0142595474432866	0.0368958620109976	86.0253872032196	184.400434849915	3.11162781268298	3.80053814202276	0.177307376463168	1.15360933181967	0.925983718428307	0.855937958736475	6.54755107365326	8.44494061852173	3.11162781268298	0.39999113881825	27.4888027970161	3.11162781268298	2.07972708871769	8.45828133988695	0.665292959740374	26.6464257237259	44.0049498386714	96.251507777625	275.64760126757	0.43579311253872	34.7833471115657	160.308012212473	33.6580636737825	57.8714169332593	21.442818565088
Female	Other	59	10606512	2016000242331	A	N	45	57	164556	FFM	30	2	06	471	549	549	45	471	5.0544409205699	4.13230757815948	0.33166759280192	0.0370595879441738	86.8319959744991	162.633712328053	3.51772366727818	4.45161627428586	0.34384643311067	0.399382267066787	0.885252036907723	0.81175994465312	6.85630193675842	9.5621640075501	3.51772366727818	0.536347237101349	22.617442033497	3.51772366727818	1.85272383798063	9.56216431454888	0.525905518050373	23.6841435506175	72.6951313987797	97.1187482529656	241.197691036787	0.178277624833034	40.772287448248	138.370857996756	40.036671371931	52.520575028939	21.2116706563239
Female	Non-Hispanic White	46	10603715	2015000309783	W	N	26	145	5554262312	MFFMM	25	1	06	472	314	314	26	472	5.10825186369924	4.29759869418681	0.481488088261176	-0.0497338494816155	118.995631511224	157.357142389877	4.55775119435193	6.32877792501722	0.455699633303461	1.30510255524769	0.889002537683608	1.22778622083604	6.16839731316926	12.3733432602962	4.55775119435193	0.285328656141097	30.291588308517	4.55775119435193	2.76062683456739	12.389252250244	0.799154601574926	25.1084088264155	95.8040717972889	129.741814389006	235.304406159776	0.230361275302377	51.7691812071963	181.153882018436	61.0529462888625	68.9102311091223	26.8114734552748
Male	Non-Hispanic White	120	12000900	2016001034686	W	N	55	53	5513613010	MFFMF	25	2	20	473	663	663	55	473	5.17463557565432	4.48168834813777	-0.390464773497305	0.0110478524950699	59.8130326582418	178.695533625159	2.29956266960507	3.31869066668144	0.123751948486243	0.808078523230151	1.01644963035959	0.557205157715884	2.98380256925828	6.25035077335732	2.29956266960504	0.39025951999865	20.5460411617692	2.2995626712467	1.58348901785807	6.25085941800066	0.321244189796771	25.0106121258765	33.1393796556908	74.1916929489314	269.226642498047	0.319846596220338	25.3507642988572	117.067428307747	23.6503757128171	37.3196007013489	15.4775884187903
Male	Non-Hispanic White	77	11210104	2014001116528	W	N	15	21	104315	FFM	5	2	12	474	190	190	15	474	5.16699511620578	4.2537659813499	-0.0207238747442645	-0.0561346715043002	68.9265956112501	165.81296639864	2.89678537501723	4.20100871404682	0.163034993182933	0.763307183451245	0.901561172280602	0.709403026044385	4.01859711041465	6.90318008349914	2.89678537501723	0.238851112472233	19.7910593732348	2.9123932581508	2.07755351105718	7.87427903816382	0.297729866729009	22.7941672191851	37.5949179426017	88.7327532204553	254.534484148505	0.367957781025411	29.4457160530067	148.057560404847	29.2150331925854	44.4510742887204	18.4332942779737
Female	Non-Hispanic Black	109	11700104	2018HU0024848	B	N	85	20	85	F	NA	2	17	475	1026	1026	85	475	4.76765312428421	4.06083758607866	0.283833177268096	0.0533536913580186	77.066660132696	124.089963623729	3.25920770979043	3.98871691974803	0.244848420341191	0.62993309990555	0.651507699437448	0.780887712100355	3.67586989216052	8.85932024599241	3.2592109248887	0.453353615745655	16.6023336603764	8.85943519503129	1.59760398085305	8.85944509269678	0.280494368840817	22.6458265305383	51.6624877392964	72.0476685535238	196.909970617145	0.139257813030092	35.3013982385224	107.966399678153	32.0827036380672	41.1262617452819	16.0442623592499
Female	Other	264	15555101	2014000681864	A	N	14	29	1650796350861470677384	FFMMMMFFFFM	80	2	55	476	172	172	14	476	5.06606824976077	4.05087358687645	-0.141373478728802	0.00137375257168632	49.8740141275079	158.767680108295	2.15121537365659	3.02087650427192	0.198880050280289	0.270816991025901	0.811509197802347	0.748039481322049	1.82181613625963	5.74210258972454	2.15097240155	0.242575812210715	12.2060592044057	5.84694919265027	1.32712444103014	5.84694919265012	0.295106638445722	22.1867289818351	42.8163091001037	63.0060948256494	236.88457859394	0.0979182985969326	25.3945151971577	89.4027722850425	25.6846868727225	34.8057567574699	12.7383047727092
Female	Non-Hispanic White	147	13400303	2017000121069	W	N	88	21	88	F	15	2	34	477	1065	1065	88	477	4.94555642126162	3.66596372407872	0.0450007946046105	-0.053593333541233	40.8932297958542	133.214829930088	1.87644303295372	2.16555480425654	0.15717676238965	0.348712530565253	0.39302978230185	0.447269519443188	1.7584843174234	5.10061449118905	1.87645588799961	0.251098575794456	9.59519007113783	5.10068452877618	1.03475603282267	5.10070099861557	0.204126068396229	20.7929503202039	32.9301721562896	52.6289945749542	207.672812917732	0.07777630547086	19.6761667975748	69.7958906866662	18.5423375601751	24.9226922330681	9.74215507333447
Female	Mexican American	223	14203502	2014000412859	W	M	61	19	6161	MF	NA	1	42	478	734	734	61	478	5.04008168087029	4.26801575176284	-0.225319909476243	-0.00578139929584486	56.9797443436688	153.592083792229	2.63779008703455	3.33843118110188	0.244508451867193	0.910809592085432	0.358307891976657	0.859846946514769	2.01554360316462	7.16543440916526	2.6377900870345	0.327377951433478	14.5751626770201	3.24051205336792	1.4275805668427	7.17025685800372	0.368473474821541	20.6013187037668	50.5548041989841	69.4411878964748	231.069081929773	0.113003498782873	28.4242866720745	105.282356276837	29.4719246050087	40.0438607470246	15.2377933433629
Female	Mexican American	274	14804607	2018HU0565346	O	M	35	15	93415354	FMMFM	NA	1	48	479	426	426	35	479	5.0410398792999	4.23685787267558	-0.33756739373027	-0.0447655731905219	49.3674094598897	147.861245870715	2.0179087693276	2.69447714977778	0.172231995625713	0.323732382832457	0.720635510115829	0.630018343829994	2.91134694702404	5.48524473165381	2.0179087693276	0.20783413492699	13.3772804948223	5.48524473750973	0.893175980006166	5.48524472781903	0.245126377960577	23.4646389421945	38.5313962583441	53.7305358702959	224.572195765753	0.0840624206769003	23.8118522845338	73.0396800730286	23.9111378846266	30.3832462161117	11.3291550795717
Male	Non-Hispanic White	82	10900500	2016001259039	W	N	0	35	03026	MMF	NA	1	09	480	4	4	0	480	4.14758174882371	1.93217879733033	-0.143662445726	-0.0466475471392652	5.98057281361052	60.3966839343505	1.04592630171692	0.16564598070085	0.00991009093809006	0.0405781334761034	0.00290051778268388	0.0445387104558963	0.0881950596109686	1.04592630171692	1.03030685432633	0.00384559401524444	0.163568393782907	1.04592630171692	0.12578941603914	1.04592630171692	0.0134336959982986	15.5430477045347	2.19614685138021	6.02769582564059	119.341799671684	0.023226656618609	1.87966237926433	8.73156913050806	1.75418564591419	2.70925956336024	1.14799287792766
Male	Non-Hispanic White	116	11800700	2017000218026	W	N	69	18	6971	MF	NA	2	18	481	831	831	69	481	5.16662980707978	4.49029264805713	0.191993728257797	-0.0143554596474445	108.016757412512	172.824105736808	3.71625748699732	4.9388355790313	0.198312287369659	1.57315403820374	1.29790419988685	1.06739507122605	8.83051216411487	10.0830712217399	3.71625748699732	0.390766291641086	33.060476601982	3.71625748699732	2.05631267043026	10.1018351967775	0.686502219714612	28.0660046539961	52.0369293087312	117.134393350156	262.564496156509	0.460434818423744	36.8078818512189	187.457372612267	37.33489492791	67.7892465826377	24.3939318665326
Male	Non-Hispanic White	56	10604701	2016001006422	W	N	94	24	859452	FMM	90	2	06	482	1128	1128	94	482	4.95147214707028	3.67302429560203	0.163918808441918	0.0416348327677746	46.3834680650599	147.393661948477	1.83953258850982	2.33923396325868	0.0882455982489775	0.646436488801935	0.745341395599182	0.552024894515426	3.25951577874964	4.99517069015063	1.83953258850982	0.153450934540766	15.7758466034571	1.83953418744513	1.20398699071437	5.00036800278307	0.255491404236859	24.2148118159046	23.5922855640592	48.0208093522979	233.019286728923	0.213648756847309	17.7602204419914	82.5149118002701	16.1598918930577	30.0542033613475	10.7161642922292
Male	Other	248	14600300	2016001283240	O	N	53	20	4853	FM	NA	2	46	483	642	642	53	483	5.14654074439355	4.37965791985892	0.471332059920489	-0.0336105149816019	127.866912866273	166.156518958558	4.40428105004963	5.69269908159636	0.241608778167339	1.50400455617242	1.96998279597432	1.0816131025532	6.05511037857173	11.9591884467813	4.40428105004963	0.803972896731932	39.5372421724884	4.40428105004963	2.32587134412673	11.9720769188997	0.637812594542814	28.0324144652012	57.2385135354587	128.192214714972	254.929914677804	0.542796605883479	46.9938632246153	229.326144389363	48.109485591025	73.9391989545662	28.0695748076556
Female	Non-Hispanic White	115	11701105	2018HU0964233	W	N	21	20	215355	FMF	15	2	17	484	256	256	21	484	5.10564619105629	4.18389510835744	0.0430095175975485	0.0415444478465089	68.5048554991251	171.947747817866	2.8589880181145	3.86725123331917	0.26808392903875	0.753403013061313	0.568602628466562	0.64827858622409	4.86775547774072	7.7715351261666	2.85898801811484	0.350110518811049	18.6502760614471	2.92608010093027	1.88373598598302	7.77153517742279	0.396079236597122	22.9612251135982	58.3628026300658	85.2959722144051	251.485287741446	0.146664815052605	35.1024839326287	112.717024926049	38.1129342789037	44.7423558287025	17.9748356096218
Male	Non-Hispanic White	166	12401005	2017001244889	W	N	39	52	429302713920265	FMFMFMFFF	NA	0	24	485	468	468	39	485	5.18073448282998	4.49351588424681	-0.106111211161263	-0.0368214010920102	80.4314020816188	171.385101800952	2.92600854632896	4.08925338958891	0.159189683662364	1.02451855161821	0.971976161612646	0.970036047477894	5.20222079751589	7.89402988198493	2.92600854632896	0.548821409534314	26.5332225073327	2.92600854632896	1.74088184587169	7.9537153740366	0.578382661517013	26.4884371689652	37.3200544238877	86.7536766091351	260.923119394907	0.361942048122997	31.3157061126069	151.728389705998	30.9747859793104	49.5463105651881	19.0865819321077
Female	Non-Hispanic White	110	11800300	2014000547903	W	N	65	31	65	F	NA	2	18	486	788	788	65	486	5.08690814098063	4.31925526326611	0.134095823445804	-0.0209816035092511	85.9143686398936	158.527255491559	3.72932568522753	5.03189277491695	0.339063671324909	1.32139409236756	1.14596983495197	0.934537529137195	3.30948885121977	10.1373578485611	3.72932565919312	0.444935388731545	20.3705717333964	3.72932565919312	2.186410747215	10.1373581476952	0.579160362848943	22.0375077135211	78.8935696450679	104.285853327358	236.615488855183	0.170635287004487	46.2869446016587	155.011100302049	41.8758771401643	55.5140212994095	22.0604053487539
Male	Non-Hispanic White	79	11202102	2014000884656	W	N	61	29	6061	FM	NA	2	12	487	741	741	61	487	5.16581156705441	4.50727903194633	0.59020619018778	0.0748742616734245	160	188.799542163658	5.16616598816689	6.51389109080685	0.323435976730232	2.05753523897228	1.59334441093438	1.91779980149715	9.59097932674903	14.0134835087755	5.16616598816689	0.755398530778639	45.3561582896186	5.16616598816689	3.68750848249505	14.0430951284368	0.633138030522967	29.9707431713344	69.0993829344	179.615773647011	280.564981846029	0.704484511500954	55.7269173946394	268.540411350382	58.3394227556031	85.8412248515028	36.2361316670904
Male	Non-Hispanic White	191	13901500	2016000259185	W	N	20	10	502016	FMM	25	2	39	488	246	246	20	488	5.16982497038761	4.32342241377653	0.247450130187193	-0.0963501086805905	96.628385514858	159.728398220441	3.39932142195708	4.96031551575586	0.169770544701264	1.25574618318224	0.934852911724208	0.860761682077136	6.83392587073495	9.2394045605421	3.39932142195708	0.449617178505989	31.1020762163958	3.39932142195708	1.88312529466783	9.2403136284238	0.66305602037869	27.4257866557457	43.1249553925569	95.5608851995561	247.496672432779	0.418642362436365	31.7175438743908	159.939856750761	34.5097014777548	53.7845395214771	21.033018511596
Male	Non-Hispanic White	260	14935002	2014000904642	W	N	19	24	19191819	MMFM	NA	3	49	489	236	236	19	489	5.18582054150543	4.3314454619769	0.294969588282407	-0.00463289524405265	102.147214304893	177.893960680301	3.62568318813346	4.84647989289655	0.198643563304218	1.16436998521178	0.736906349610293	0.843848739971152	6.59095970937761	9.84923804951733	3.62568318813346	0.507761910620582	32.1518083318023	3.62568318813346	2.84547487232461	9.85562872605249	0.646749853534357	27.1732321895118	44.7674885370364	121.275084867998	268.320383038663	0.443230779101009	37.4528339359845	185.823488187766	38.9326346663524	71.413974863206	24.3211175454202
Male	Non-Hispanic White	186	14000900	2014000638444	W	N	12	25	4312	FM	NA	3	40	490	144	144	12	490	5.03332432500932	3.84522976327958	-0.218119487233583	0.00776783393306612	37.6039942965902	154.638812994459	1.9127944135331	2.88152045233575	0.0869064820149084	0.454734956139329	0.483882620627326	0.369026253318045	2.44282754435087	5.18695450546633	1.9127944135331	0.0901040562876	7.77524597789903	2.16107114930047	1.14839669853415	5.19951429588501	0.204776682611077	18.6591928696156	23.7236087906597	49.3854825749772	241.558120836979	0.229373735477664	17.2558651327119	89.6412909139251	18.6785771053821	30.3933886651624	11.5512756020132
Female	Non-Hispanic Black	202	13602401	2017000064284	B	N	36	40	363834	FFFM	NA	1	36	491	434	434	36	491	5.10323224824561	4.43147495499464	-0.761534441507231	-0.104760130763109	39.2495709707603	148.18657437292	1.63210809571332	2.19188997723315	0.141041566349622	0.463926129977013	0.537869487081535	0.471727572134064	1.92907922663255	4.43589695680515	1.63210809570062	0.250069934632225	10.8177868143005	4.43652977862388	1.04063237654859	4.43652977603936	0.189466190262728	23.0483878955282	29.909778238004	46.1234686486892	224.942676518877	0.0684706272924919	18.8650316154982	64.2422683416504	17.5451374714849	24.071357246979	9.17826908537561
Male	Non-Hispanic White	83	11208101	2017000462546	W	N	40	11	34153416181012441010406	FMMFFFFFFFFMF	NA	1	12	492	485	485	40	492	5.19489505009268	4.57697265724493	0.139031650059327	0.0163902984036473	111.720957023011	183.329549177673	3.73622515651767	4.94676515959413	0.222056721694955	1.42400198402533	1.19282871889545	1.39450286095016	9.96891154415678	9.98818777092649	3.73622515651767	0.44828813952876	34.4234795627292	3.73622515651767	2.40443553585324	10.1561123348646	0.58799750715985	28.9020943178756	49.2804793754058	117.56188437423	274.446132285299	0.483573549004364	40.8060673718008	199.000558202091	41.614697445857	63.9432225020335	25.6348135888328
Female	Mexican American	118	11700202	2016001205430	W	M	9	39	51293938	MFFMF	NA	1	17	493	115	115	9	493	4.92270444192178	3.63104220770069	0.201146379616093	-0.015051554229443	46.1634605195055	135.321426791809	2.32608009946669	2.8920266390025	0.182288417839999	0.746053589236636	0.563749007019546	0.541385152170081	2.45977943355694	6.29470820356738	2.32608011301857	0.168166823953679	6.06366024352335	6.32294126182386	1.24442001287554	6.32294126182386	0.336244544600801	18.8460321981168	41.0160977055916	56.6144078791553	210.131006434619	0.091447173422894	25.3653705644383	87.4522358868686	21.660142828639	32.7612713883363	12.2195388007948
Male	Non-Hispanic White	31	10200200	2014000426450	W	N	46	16	462347	MMF	20	1	02	494	558	558	46	494	5.18338525955062	4.51293024383438	-0.194142851573336	-0.00297361689029515	75.0975092364755	177.75596787459	2.76478612065506	3.96587059389806	0.154720791667551	0.938438668721616	0.818844665886748	0.988513930859519	4.17861415902738	7.49613012886098	2.76478612065506	0.327075560797121	25.7160349669423	2.76478612065506	1.75665265114537	7.51546785237008	0.423458875737984	26.162140563221	35.2445088842488	87.9509478990545	268.164265285941	0.360690003566023	31.1332199664352	142.334072734137	27.736600784192	45.1738955555151	18.5354209679558
Female	Non-Hispanic Black	191	13604112	2017001258249	B	N	40	18	51112414017	MMFMFM	20	1	36	495	486	486	40	495	5.09728876915468	4.44584119805606	-0.342946194962212	-0.0174565169268369	60.5152260180944	160.747088700814	2.69387532439039	3.49097114603623	0.263735356150969	0.433928964676544	0.255882178228288	0.831114805792614	2.12491850449712	7.32265812827374	2.69385578248451	0.188377469448975	17.8514268376427	2.91063832249474	1.42387996023015	7.32265922201697	0.351541530997485	21.4641669429987	54.9600028438563	77.3592873775989	239.096132663443	0.132055950526271	33.2665173423496	110.558763822507	31.9264132192376	44.2113276215517	16.1022624886275
Female	Other	114	11802500	2018HU1048518	O	N	53	22	5317	FF	NA	5	18	496	646	646	53	496	5.04766375451093	4.06180062170424	0.121584574383122	-0.0753942479259892	65.5875043992509	144.35412853775	2.96251826140483	4.01149783730177	0.261591318747288	0.222813851199265	0.963921612428274	0.831162711283428	2.74672878933004	8.04979647202159	2.96251826140483	0.453291938791557	16.8638252724689	2.96251826140483	1.81179265900075	8.05295955645481	0.335752897974669	21.1391055217156	57.2368577870928	76.196881657445	220.565265674546	0.134846860546971	32.481160439727	123.548308648836	35.8396451445561	44.6731871367835	16.3357156848113
Male	Non-Hispanic White	79	11201701	2018HU0970229	W	N	76	16	7673	MF	NA	3	12	497	912	912	76	497	5.15760906429424	4.44466553083138	0.0700921072077119	0.0748334298532127	91.3554222598153	187.249601485635	3.1861506994372	4.39419059617701	0.195485655744976	0.95982912171177	0.614696816878954	1.05100356306337	8.76922717544057	8.63355543618636	3.1861506994372	0.488008385613664	28.0676916720586	3.1861506994372	2.51716745650614	8.66085554893771	0.578717334814351	27.6726620545451	42.8216974058589	104.413625181514	278.835739612333	0.427482985979313	38.716026666353	169.210069843922	37.4805513339438	56.8689618853974	22.210317169848
Male	Non-Hispanic White	260	15151105	2015000678228	W	N	85	11	8485	FM	NA	2	51	498	1023	1023	85	498	5.07117259125871	4.11224637246273	0.379755282639132	-0.00707651591745578	89.300014932694	158.237342771866	3.23752426317478	4.08051044928917	0.168131981686678	1.02017326675296	0.967270780182741	0.818822702415059	6.5279553431309	8.80044400917689	3.23752426317479	0.419315282184665	28.4217387025017	3.23752426317478	2.00440795073512	8.80050330783614	0.732428746918915	26.5828094783527	42.0065212907045	88.7548487684694	245.761867160998	0.395840514913081	31.1704018811351	154.585677590679	33.0986063722399	49.6841031186806	19.8915001974217
Female	Non-Hispanic White	262	14804633	2017000563335	W	N	32	22	3581363211	FMMFFF	25	2	48	499	385	385	32	499	5.11078616370851	4.31209255529034	-0.326754047263126	-0.0499091175099675	53.8034993120378	157.728791114462	2.22795125472911	2.63588985095554	0.200795978300014	0.334224760199664	0.737279208702881	0.592014181658034	2.54256603784051	6.05453652239233	2.22790190332774	0.21155608836401	14.6867078026713	6.05564652253975	1.06263367374085	6.05606525940512	0.315989193303063	23.1498511364766	43.9399993719604	68.5205819490059	235.721092631884	0.105128823457378	25.7053476187488	85.469426705631	26.9304439001976	31.8614417242585	13.1290867732267
Female	Other	263	14911002	2018HU0823467	A	N	2	41	411281102728312	FMFFFMFMMM	15	2	49	500	32	32	2	500	4.52494318460162	2.60899254775423	-0.0615167678604032	0.0272340958507825	12.7748166009133	94.8386740754316	1.95399480726894	0.941173373372987	0.0480367463676211	0.126649323784185	0.0734223043273453	0.159368164334314	0.325553446629807	1.96388293228682	0.758226232006968	0.0238840279767158	1.66283189369855	1.96388392138177	0.306524872770129	1.96388392138177	0.0697162983281244	17.6820796026107	10.2490229624475	13.5652944188845	160.954943365479	0.0227872573656417	6.27291115724785	18.9571632281695	5.90293083030686	8.26327174213519	2.90713808657553
Female	Non-Hispanic White	215	13701208	2016000531171	W	N	16	19	451655	MFF	30	3	37	501	193	193	16	501	5.09494728109551	4.12928871908491	-0.151130413037339	-0.000897162262419194	53.4185629340283	163.048893970017	2.38651715265439	3.19572031994953	0.24345358635604	0.832467441102584	0.610594697254606	0.726878470844505	3.37712863177889	5.33616812440198	2.38651715265206	0.211265545081631	15.1872393319544	2.38651715265206	1.29444172088098	6.48722619761694	0.378147370727752	21.3834816668575	49.1473146843066	70.3021920825617	241.659352383807	0.116527411147534	28.3950775027424	93.1228511496841	28.0151943702781	37.622916868324	14.4181047390685
Female	Non-Hispanic White	262	14802600	2018HU0544502	W	N	35	29	44351111	MFFF	NA	2	48	502	423	423	35	502	5.10722409372156	4.28031273973456	-0.259085270757482	0.0101283872096194	55.7695191852347	166.892931978626	2.4358591747186	3.09849899794239	0.236949300403914	0.576117990368319	0.675541699225201	0.871697168153116	2.56456951950659	6.62135161257875	2.4358591747186	0.427613142272857	16.2014224440344	2.7860675837074	1.01503450640994	6.62135173132281	0.38093130111032	21.8952148646087	52.8645594710571	69.5934405655272	245.919899545089	0.117019015479931	29.6994824665365	95.6957519459308	30.4565748674608	39.8496291521196	14.9756560888196
Female	Non-Hispanic Black	188	13603902	2018HU0107087	B	N	67	56	7367	MF	NA	4	36	503	810	810	67	503	5.08404040980309	4.38446051281833	-0.146286105114294	0.0200612815698433	69.2812569896089	164.696056172203	3.07663923200335	3.80259307832829	0.302055455210507	0.502993030619584	0.984507599363822	0.849097199025675	4.57193830323629	8.36316256221691	3.07663923570888	0.389003187349456	16.8072763096967	3.07663923215157	1.71113054809521	8.36317251707889	0.309558902573439	21.5184858429099	58.098423382984	91.7071907683558	243.488029009471	0.153291553346396	37.8733635513017	129.567876754416	36.3145339417824	46.0147543364078	18.7281205643427
Female	Non-Hispanic White	74	11206300	2016000675494	W	N	64	23	64	F	NA	1	12	504	773	773	64	504	5.08818452686042	4.31053441488456	0.0455464034426977	-0.00121313741278804	77.9510307259043	161.898790411417	3.40701484402575	4.0721702984864	0.333055282516265	1.02973485801336	0.579143748397665	1.03019280786188	4.77633297354126	9.26122643191302	3.40701484402575	0.347756670627726	18.5432732782676	3.40701484434715	2.10502572070322	9.26122653979753	0.501557756211618	21.8795688585251	69.6305219987981	87.3239521778304	240.379771198435	0.169438911827597	41.9171193191313	139.739138070614	37.9236337254499	55.8450553174466	20.4744362169145
Male	Non-Hispanic White	45	10607902	2017000065388	W	N	77	17	7774	MF	15	1	06	505	934	934	77	505	5.15215787570785	4.43922971270362	0.2760817943468	-0.000448003612290776	111.643583520912	172.726578320019	3.94879904887744	5.52166966244245	0.21825467575845	0.911669245759562	1.48365925554209	1.0014734650466	6.88088731094864	10.7111821474289	3.94879904887744	0.440993163347889	34.6099596949471	3.94879904887744	2.25034527378573	10.7339486986453	0.36401513997908	27.2727943708986	52.0054344316199	127.499737768534	262.453361296207	0.453581107662596	43.7938756791429	211.381246308367	37.3349361177655	65.9606435429556	25.9093895865287
Male	Non-Hispanic White	261	15501001	2018HU0193304	W	N	50	22	5250	FM	NA	3	55	506	602	602	50	506	5.17775872158694	4.53663996001925	0.194453398283792	0.00815286020598901	113.41950273573	178.736308313509	3.99669789989671	5.5103960377953	0.247232259291354	1.33889467306782	0.909678245536147	0.826744730944216	6.17500169498067	10.8560549350817	3.99669789989671	0.698843128796598	35.3253030520621	3.99669789989671	2.68574565704914	10.8641502309002	0.689402536250722	27.3783026829877	56.0741728642575	131.689972060527	269.272715219374	0.555584674194102	42.4380433416173	218.416120222813	43.7423579829234	72.5969055785455	26.9050423854189
Male	Other	37	10603743	2014000824647	O	N	64	21	64	M	NA	3	06	507	771	771	64	507	5.12943860650213	4.35604965919563	0.0519074752643414	0.0425237979129234	82.1015696029343	176.260392486253	3.11875652344723	4.19749415052042	0.169336253081915	0.783806562395035	0.783420284085545	0.445952899450443	4.57250688644763	8.46816831447479	3.11875652344723	0.510914471298344	27.2414855452575	3.11875652344723	1.45320148516424	8.47765918507388	0.488021600028508	25.3250975142444	45.1051910420245	103.409732001746	266.470300397246	0.41980725522131	33.8978146225934	150.929892231764	32.4008387747249	56.4982726974752	20.7763996917214
Female	Non-Hispanic White	276	15311507	2014001258233	W	N	35	22	35353	MFF	18	0	53	508	420	420	35	508	5.10675333628395	4.27992619693318	0.419599525846422	0.0104762552800522	109.895039376524	166.872423871968	4.3319472236285	5.43430398063241	0.385722013167587	0.906625406673907	1.15166053113126	1.39729501783136	5.14277030874155	11.772678118542	4.3319472236285	0.337913150074488	28.7232263914116	4.3319472236285	2.41249633010224	11.7754534198329	0.752308810138116	24.3685083643458	90.0480023095728	136.603617833269	245.897234883949	0.202753909734833	54.0627075696132	191.365961714909	51.4289715217501	63.2322427628305	26.6303460988362
Male	Other Hispanic	272	14805302	2015000354836	W	O	65	14	6565	MF	30	2	48	509	782	782	65	509	5.11810016362134	4.37295823071099	-0.092959072560254	-0.0410168172842594	72.2403791917896	160.305816867005	2.65623486078439	3.82805519876534	0.141935469728019	0.752986884822604	0.807302665462306	0.934929756962146	5.62620156762071	7.20678983138257	2.65623486078439	0.324766864022675	23.3008396614603	2.65771575370581	1.87976413669828	7.22039495418934	0.571283427037131	26.1965330544818	31.0111177291199	81.2162190001826	248.167395587563	0.319774520773429	27.1682299971539	120.201888975933	24.8839955591555	39.5084365673255	16.4797721867439
Female	Non-Hispanic White	255	15310702	2017000414367	W	N	81	13	81	F	NA	3	53	510	976	976	81	510	5.03901449593218	4.08426611761519	0.0173416445475525	0.0911502429891677	60.4373784572415	169.0449640362	2.598845764809	3.10647681408221	0.226962794533021	0.539306406342963	0.906922281784654	0.877914858889562	3.18636277914673	7.06162465238949	2.59884576568014	0.100615712336019	13.469072694887	7.06009605000717	1.32028219829898	7.06439521742666	0.33863972494974	22.2554695148224	57.6811258709764	86.1022493514287	248.294381601329	0.13279677888304	34.1469360379162	116.698946607305	34.9724091433795	42.7013587368785	16.1319700512621
Female	Non-Hispanic White	248	14500101	2015001108731	W	N	49	27	4918	FF	10	2	45	511	592	592	49	511	5.10018603148877	4.32164892880582	0.0759235450505327	0.0126806618544518	81.2533843480114	166.145962361916	3.38425881556121	4.26996594499853	0.300637847788547	0.787491107447894	0.887036932598735	1.10216983985181	3.54272662214344	9.18055406833257	3.38425881556175	0.513443951828593	22.6177091442151	3.38425881556121	1.85129760045036	9.19936924114238	0.539770118092808	23.0092111083227	70.5742285095542	100.524825866457	245.093931418499	0.164202138588456	40.601082391429	144.730163691977	42.5252537444039	54.2614181087499	20.7365324510902
Female	Non-Hispanic White	80	11210900	2014001239159	W	N	49	28	4949	MF	NA	4	12	512	592	592	49	512	5.10018603148877	4.32164892880582	-0.149842994009771	-0.0210602301315325	64.8324295892655	160.633568882862	2.69163861139394	3.38065651826151	0.269906093219395	0.972143428529312	0.513157295515904	0.780679348834291	5.3433653656772	7.31663070821432	2.69163861139394	0.367730951420222	17.6269270607288	2.69163861139394	1.6016756632058	7.31663232613076	0.37461325856372	23.0866026051284	54.3943780427634	71.2490275166181	238.969483964753	0.125893204619581	30.9478255902072	105.815688628964	32.224815404125	39.901507747713	16.0804872496104
Female	Non-Hispanic White	80	11210103	2018HU0805998	W	N	81	28	8185	FM	NA	4	12	513	977	977	81	513	5.03796440520555	4.07956609072153	-0.577741644854531	-0.0316485159321848	33.1759244557766	149.353486558386	1.50683778875001	1.9411940577404	0.137103470882914	0.365248902618837	0.340557540436762	0.355820335635475	1.88793871449188	4.07832231375816	1.50041686840578	0.119393105709224	7.85986466522743	4.07797557129616	0.908538329763129	4.0785559081224	0.178156716904631	21.1111176118965	25.9514061051408	40.4778169135278	226.269875799858	0.0725858390276774	17.8770569671636	60.3499512117809	16.4150979115042	20.7401717194989	8.48747846092982
Male	Non-Hispanic White	225	14703000	2014000890612	W	N	68	40	6872	MF	NA	2	47	514	820	820	68	514	5.16755076655024	4.49018746166488	0.135841543018577	0.00151100408213255	102.107788435306	175.749866419786	3.55107327117767	4.70231835829975	0.180944222491941	0.82715831597489	1.16577341938778	1.15183505776536	9.08668870790867	9.6528125887625	3.55107327117767	0.469201952669326	30.6641294095335	3.55107327117767	2.72487750506056	9.65281794446816	0.583102668563673	27.7540640921337	44.4691365633461	107.152382574191	265.891230934733	0.450517015264625	39.8373852577164	176.689772174918	37.5123573193857	64.0224567710334	23.6049810803215
Male	Other	42	10610702	2017001229899	A	N	57	33	578	MM	40	4	06	515	693	693	57	515	5.12870754191225	4.37394321993592	-0.111017762482026	0.0269764583579135	71.0174383504639	173.414381685544	2.66352544012337	3.68563711176219	0.15331312722287	0.745625114024076	0.823948360221757	0.701009368347443	5.20992646907194	7.2401191016601	2.66352544012337	0.4467558477992	23.5753564930053	2.66352544012337	1.31081923464753	7.24021280350193	0.340246132979948	25.6629472655513	37.8331787433614	81.9006574416547	263.236795740278	0.351688226590053	27.8101425082552	134.736379411321	29.5026374169821	46.7651875686821	17.5284475557698
Female	Non-Hispanic White	179	12701302	2016000083639	W	N	28	22	27028	MMF	35	3	27	516	344	344	28	516	5.10390303036164	4.29406404343059	-0.214210198436162	0.00814950203876809	59.1368260750874	166.010747859208	2.49607608969415	3.36539530037728	0.230985609936852	0.590233060045732	0.488093303123134	0.851127788715615	2.61398774030552	6.77543873091212	2.49607477589219	0.40733154903652	16.7273848522487	4.00989566617735	1.60794082400604	6.78503470565632	0.258084128124881	22.6919288821975	51.8841886095562	72.9190865126768	244.944317672063	0.128823385881256	30.3164782372135	107.375973892058	30.7426187164811	40.593471592235	15.284983320984
Male	Non-Hispanic White	151	12101901	2015001057128	W	N	49	14	4926	MM	NA	2	21	517	591	591	49	517	5.18164828272441	4.49062470399438	-0.0864401912033894	-0.00840839111181077	81.7924149707999	176.485706768503	2.91391702432209	4.21721131440423	0.160577876894765	0.749446916213873	1.00460552145715	0.943748866771341	6.53815540828797	7.92025351930066	2.91391702432209	0.522514107962891	26.4398701590772	2.91391702432209	1.90281209730436	7.92084769684984	0.614896798127193	27.0695758623492	37.9838311737201	85.4299428906371	266.725732042166	0.405277614418256	34.3334655687274	144.077945211058	28.3754034209387	52.3443090110224	19.430416285561
Female	Non-Hispanic White	155	12602905	2016000201411	W	N	38	14	11381342	MFFM	NA	2	26	518	466	466	38	518	5.10714149997075	4.32911424188525	0.0614879914126469	0.012797024014957	80.6889979524124	167.325082825728	3.35389253556979	4.3845757251859	0.309916944244686	1.01200417052172	0.754801363722498	0.986914471906152	3.82096290354377	9.11678647191389	3.35389253557265	0.263769939642007	21.9138119632811	3.35389253556979	2.34095996007764	9.11682511827397	0.532854064862543	23.0583134661183	70.3387668777243	102.601563341318	246.397331979375	0.166440444528875	43.1879434417656	148.529937358177	39.3971136100787	52.3440844959399	20.6597543127484
Male	Non-Hispanic White	45	10608701	2014001323450	W	N	54	37	6552905456	FFFMF	55	3	06	519	654	654	54	519	5.1729628958661	4.50394286680908	-0.128165113996863	0.000370735353699853	79.5016481436621	176.502251244756	2.94161968513905	4.11465223071717	0.169656706359494	0.926918361979999	0.593439080296472	1.26226391801826	4.45272555105486	7.99614191883246	2.94161968513905	0.37071883445323	26.0515808170703	2.94161968513905	2.12271385365205	7.99615122535192	0.686617085841188	26.0264876677639	44.5258956022005	88.6775395415245	266.744484775375	0.384769927062407	32.5318536693887	154.165836109871	32.981108443713	50.5208976164099	19.6165206829379
Male	Non-Hispanic White	19	10101100	2015001285637	W	N	62	33	6262	FM	NA	1	01	520	754	754	62	520	5.18134319264055	4.51811093608933	0.252255520517746	0.0644227736074664	117.96246216467	189.761110182487	3.99252080673417	5.42147743073795	0.234401560774603	1.74532562433977	2.04899602709119	1.28984565246558	7.4011537135264	10.8527934598238	3.99252080673417	0.541172376675236	35.3992983980651	3.99252080673417	3.00988653998145	10.8527967584456	1.05975491932265	28.5458603410915	54.5525765146201	140.541770352457	281.636002418139	0.510478879672878	47.4492984329675	210.868813122976	47.0573275467964	81.9787182255824	28.1109399894964
Male	Non-Hispanic White	120	12000601	2017000362507	W	N	66	86	3678286193766	FFMFFMFM	149	4	20	521	799	799	66	521	5.16399196002069	4.46917264931307	0.0382832790094025	0.0281279124131899	90.6908008745014	179.849406908238	3.25250257349759	4.54442899117441	0.202197245161251	1.54385226882703	1.22486447028596	1.14783147944872	6.13210628125116	8.83496795123266	3.25250257349759	0.59677389024949	28.4361119806595	3.25250257349759	1.93638330517247	8.84121864255422	0.376367102361122	26.8833909659222	45.9591243358393	104.195986159168	270.529431178913	0.472113344366401	34.8804714905023	176.450180317895	33.7274617172259	62.906644051137	21.9974417779063
Male	Non-Hispanic White	11	10400119	2017000325358	W	N	43	28	436816	MMF	NA	2	04	522	523	523	43	522	5.18141557951548	4.50024423205522	0.107459075687486	-0.0698190070831923	100.253633281829	165.935070858058	3.47963858807138	4.91384675155957	0.195823675614591	1.24271744739991	1.38573552948657	0.955680181581858	7.40999087243691	9.45716451434232	3.47963858807138	0.401933663717536	31.887380705527	3.47963858807138	1.97908636139731	9.45863834355436	0.651299567720534	27.8115075012419	44.9027861734395	102.031825556317	254.675050367115	0.430177386039775	36.8611064245906	182.807287477939	35.0912386249318	51.7773886618073	22.1544283169109
Male	Non-Hispanic White	228	14703207	2014000640379	W	N	2	16	35352	MFM	NA	2	47	523	34	34	2	523	4.55214804780535	2.69586894879664	-0.14925938492406	-0.0818364509365138	12.763755641387	87.3839473360902	1.89283756886127	0.976683425183813	0.0231645665826255	0.116249472302122	0.0701739244486902	0.144535000805158	0.375488618613619	1.89284145043187	0.738721968286174	0.015947514977902	1.93166207421858	1.89284175238492	0.298794486712077	1.89284175238492	0.0832415859291387	18.3298392373048	5.90392561176786	13.6639008971701	157.436891420357	0.0537270977158745	4.72880898063508	20.6491904113137	4.25709158452574	7.50283401902384	2.74073054462381
Male	Non-Hispanic White	82	11200102	2017000002080	W	N	5	21	953232	FMFM	NA	3	12	524	65	65	5	524	4.73275825141503	3.01674566259181	-0.14832084239399	-0.0514319995243586	17.6092585939232	107.913097656586	2.33230572755338	1.38838308104059	0.0333787424143163	0.216523298827134	0.101771382716473	0.190223249490523	0.716838467674171	2.56671666463228	0.946027574226617	0.0444523327512114	2.60716317729748	2.56672019015369	0.485756632419332	2.56672019015369	0.0647886942944225	18.6490634359453	8.68852349032412	21.7385654728548	184.432894125073	0.0844394353982044	6.84116325767736	33.5843966075793	7.04404244348537	11.3923557543545	4.35373944786714
Female	Mexican American	255	15570201	2014000143199	O	M	51	24	51	F	NA	2	55	525	623	623	51	525	5.04356328090581	4.33637078479754	0.153167718892746	0.0032809621932394	89.0803261493008	155.530871599185	3.73562037251376	4.56414378855287	0.335071794074519	0.763013569287372	1.69428935184883	1.05597506503609	5.17997039716517	10.1544118399769	3.73562037251378	0.55097445935204	21.6758444669228	3.73562037251376	1.92588529725152	10.1544689766256	0.443592438937652	22.8461934742468	77.6556450709501	103.256996627672	233.253231281868	0.181565461969683	45.5618903009001	148.40267627227	42.5760025900536	58.1400266711616	21.7836380682802
Male	Non-Hispanic White	7	10101800	2018HU0045530	W	N	69	17	6962	MF	NA	2	01	526	838	838	69	526	5.16706039920128	4.47666212982986	-0.0459718906247153	-0.0587827610344816	83.9893696630939	165.385256169645	3.06173475248798	3.97543428875964	0.173705529175784	0.732572595516517	0.747967383532558	1.06137561274258	7.23619251964	8.32184766743028	3.06173475248798	0.380141228791757	26.3032760953141	3.06173475248808	1.96392465392462	8.32265794124961	0.437136056022885	26.4319549055788	40.7122019768231	99.4027834943912	254.041901398045	0.399408672220791	32.9649723231511	150.535804416493	31.0406158338294	49.2348412898676	19.445222952463
Female	Other	261	15600100	2017001185090	A	N	55	10	18552455	MMFF	NA	2	56	527	671	671	55	527	5.06409568131959	4.19285597020819	0.0480019230833079	0.0191219093069728	69.4674219179573	161.292194155289	3.0257674919185	4.08690940190356	0.279913474970535	0.936074108300562	0.718530754883323	0.688088247830814	4.85636403080291	8.224887521838	3.02576704880307	0.451290633276823	16.9180475931178	3.02576704879326	1.67766453220034	8.22488758203131	0.42266029690645	21.9586153850352	58.0066852249935	89.6179635711703	239.703969976698	0.152024247372858	38.2052926968884	120.256142730704	38.7936406221084	52.5543216340486	18.1322093455105
Female	Non-Hispanic White	47	10605913	2014000212178	W	N	42	11	13947421666466	FFMFMFFM	NA	1	06	528	511	511	42	528	5.1028959670828	4.27364416804909	0.379064780480062	-0.0105710716770343	104.868685010054	162.767840707886	4.04862192825897	5.54264962558935	0.357217971492744	0.231326174431733	1.02636241502204	1.37014015082549	8.1679110294253	11.0052933050556	4.04862192825897	0.505409689380224	26.6791340253114	4.04862192825897	2.24988808263434	11.0052954177995	0.578607497239074	24.9023161135598	91.2861202298901	115.413785769902	241.346867310244	0.174262827066054	49.8187875667208	160.18666500381	49.5242251771456	60.6731015619654	24.4280554827215
Female	Non-Hispanic White	260	15151235	2018HU0385617	W	N	29	15	2930	FM	NA	1	51	529	353	353	29	529	5.10517806350936	4.30326810362535	0.356133211295808	-0.0107825134231033	105.572858337952	163.10522588263	4.0715007436531	5.06126225688197	0.393942768081833	0.694855137081257	0.965860230800214	1.16787139207208	7.63473048535228	11.0627639291223	4.07150074365311	0.117648729780049	27.3742556439413	4.0715007436531	3.02766073470331	11.0674864860285	0.516038921564306	24.9297160887236	73.7587817838624	125.807749927699	241.72196801418	0.200513033411156	51.0095742533749	168.295829715105	51.6023421373969	66.8451094860932	24.6042793131756
Female	Non-Hispanic White	218	14700300	2016001301276	W	N	37	21	37	F	5	2	47	530	451	451	37	530	5.11146237355522	4.32863514287892	-0.0221320587028064	0.0699119962382858	74.1806314313536	177.927180770374	3.00168918625222	4.07727697825292	0.258143898447776	0.597159589951523	0.775842558150609	0.984704657773309	5.58177293466992	8.15943513123545	3.00168918625222	0.283082610567951	19.9090115060886	3.00168973719194	2.36507564123984	8.15943716967143	0.557573097103427	23.7129622117779	62.9041748850626	96.4379533078668	258.016177888729	0.160028428668691	38.6507488004363	138.599036701492	37.9741946986092	52.1174263398634	19.3621092761682
Female	Non-Hispanic White	175	12101703	2016000155875	W	N	60	39	7260	MF	NA	1	21	531	729	729	60	531	5.09579586869113	4.34878008493702	0.0955835195472305	0.0244002117710483	85.1456742664084	167.368184034746	3.65557534757327	4.21744568283438	0.360408444230749	0.951097207356048	0.996237829824005	1.18734576313173	4.9444824526609	9.9368838735939	3.65557534764881	0.361867171211789	20.4225207734726	3.65557534757156	2.06885261737185	9.93688403986416	0.510294913860934	22.2920036302826	79.7046665493505	106.469891031796	246.444932498139	0.191372262401609	40.9117174975055	151.172029057235	46.5553267956851	54.2313571387789	22.5224504943534
Female	Mexican American	179	12800500	2018HU0456877	B	M	56	35	175654	FFF	25	1	28	532	677	677	56	532	5.04204749247658	4.40075263408857	-0.017165690828566	-0.0149876037461919	80.1249221200734	152.484032970092	3.47875546720845	4.44504891165658	0.300613314059865	1.13453247213779	1.28862351393843	1.22396025998493	3.77926590137036	9.45620139988926	3.47875495603585	0.293364262039983	19.4246488915136	3.47875495603623	1.79327410351412	9.45623638254783	0.513588785526243	22.0326433257542	69.6594574787693	94.1494741722622	229.817709469932	0.166799430221002	36.6229407977111	134.386227018512	36.7209369630222	56.9245628264009	19.9869873950833
Female	Non-Hispanic White	81	11302500	2016001351017	W	N	28	46	5829275328	MMMFF	NA	2	13	533	339	339	28	533	5.09645648090927	4.29448552507144	0.0621799873935489	0.0121844046447363	77.9966215636486	165.445342844334	3.22654664871558	4.2607592188188	0.315333769166247	0.677503207490018	1.03230936836048	1.17026887422107	4.5629163583193	8.76870822458137	3.22654664871685	0.367036638432749	21.2614481368247	3.22654664871558	1.63397980794518	8.77066312022526	0.441500562285381	23.1734058283947	66.3260877957702	96.7919980000498	244.318371197495	0.159803047687476	37.272325686138	139.741308388197	41.9836030924527	51.0217162489286	19.7076155451732
Female	Non-Hispanic White	44	10603766	2018HU1288533	W	N	53	17	565318	MFF	NA	2	06	534	638	638	53	534	5.09538345726891	4.29643883481695	-0.311804995426491	-0.0673919388604827	53.7655990286637	152.626157814217	2.44083299875293	2.90361271520155	0.212112821412671	0.538698194077539	0.895521741385746	0.571897091774182	3.43155664254299	6.63478955791174	2.4408052571174	0.369009957241022	13.9449798638125	2.50025357732379	1.31708458462626	6.63479657402769	0.320968426560812	21.0278118755622	48.6201108145771	63.7681863282749	229.978344331985	0.109592300337656	28.237087218721	97.119210689618	27.4908635196382	34.7704902982487	14.0333087967162
Male	Non-Hispanic White	47	10603760	2014001489593	W	N	34	10	034373	FMFM	NA	2	06	535	408	408	34	535	5.19692635925068	4.52604430573515	-0.0237587748107788	0.00621783696616123	90.2231035261175	181.843094338065	3.16023028402985	4.66689620816849	0.175322683704419	0.994344603096047	0.712923225298591	0.837217357919854	7.71587340735044	8.56392390420583	3.16023028402985	0.508981417526827	28.8557863273776	3.16023028402985	2.20535263496727	8.59039655475597	0.354252213754086	27.5495345013488	40.5465910494722	109.06550591917	272.775506964681	0.481693235752176	33.8885444785931	167.87733127609	34.3556025428284	53.4528565917159	21.5508354462845
Female	Non-Hispanic White	74	11209906	2018HU0754299	W	N	63	25	63	F	127	3	12	536	759	759	63	536	5.08684927490158	4.33713714272195	0.263192071102653	-0.0539007975718794	99.5170726457074	153.384597633331	4.07797828969232	5.00699930897587	0.321222498130822	0.865572356004967	1.53789896225701	1.27818354759235	7.07496699130456	11.0810059849736	4.07797828969232	0.612746310788058	22.9494847523203	4.07797828969232	1.80663397549785	11.0850942817211	0.511412817334002	23.4035317444556	76.7401094586061	101.515154527807	230.834930523068	0.193436195443768	46.3524768370634	163.400297145785	51.4632346406225	61.5537464045583	23.5334958793927
Female	Non-Hispanic Black	153	12900902	2015001135368	B	N	25	25	5525	FF	NA	2	29	537	301	301	25	537	5.09619193971004	4.3879995875637	-0.0714967036721417	-0.0085357285774298	74.9261441650969	162.009700186238	3.15376778025308	3.88695702353095	0.2738541367574	0.754523903205361	0.697490346128888	0.858265298498056	4.34327966911559	8.57282840661838	3.15376776647376	0.294928359951661	20.5982263075567	3.17247113911729	1.89116892516578	8.57282961078549	0.44193378376446	22.7576605866804	61.7383007524109	84.4836941701076	240.503265870116	0.145718426757129	34.8065540403937	121.999787868068	42.2759108560473	45.8585144333336	18.962286190821
Male	Non-Hispanic Black	152	12600400	2018HU0157367	B	N	73	27	7073	FM	10	3	26	538	885	885	73	538	5.15953651744331	4.42288723934761	-0.12002195735765	0.0306251861946362	73.9112672120897	179.497575996243	2.72720983883931	3.75053982531356	0.165779521727898	1.14596098175039	0.794111788333583	1.00893616313765	4.66346865040127	7.41156335684828	2.72720983883931	0.465549559789919	24.0460231089754	2.72720983883931	2.00686694560146	7.41332494731106	0.656440855873082	26.1014229119773	33.8866298850485	95.3692644848016	270.132416065863	0.376250083838104	28.3323759151132	142.53481089602	29.7531838793265	45.391612144124	18.4176945721064
Female	Non-Hispanic White	260	14913001	2014000645410	W	N	69	14	69714544	FMMF	NA	3	49	539	828	828	69	539	5.07411723444353	4.25757145763195	-0.105464216372357	0.00179616387663196	63.5678119780436	160.118377063255	2.86424087464962	3.63498450455186	0.262391603220068	0.815197570559177	0.729767976307384	0.793490968698101	4.33218888624184	7.76846876709963	2.86424087464962	0.347906610634265	15.3662061590952	2.86424087467811	1.32852082506749	7.7858139210442	0.388454994058364	21.1935984995744	54.0303130291377	87.9465419401909	238.394427263593	0.135157337938903	36.3098545854202	113.203073683035	33.6558463973527	49.260963245929	17.0704765714267
Male	Non-Hispanic White	224	14500700	2018HU0048365	W	N	45	14	4549	MF	35	2	45	540	548	548	45	540	5.17868002832675	4.54884169594763	0.25053328464219	-0.0553353268983849	121.43449487828	167.895993508007	4.18215841135784	5.299596958567	0.22007901376964	1.60505960245368	0.918968140595105	1.09583032396998	6.6835645184268	11.3682840950455	4.18215841135784	0.73271922258801	38.6541441591465	4.18215841135784	2.35962930194855	11.3682852133204	0.530360856360576	28.0363211848911	53.3631564096471	119.307226965143	256.928931877248	0.514931143835827	37.885806143602	185.377004145729	48.4353570442755	66.3336099222	26.8629373392905
Female	Non-Hispanic Black	82	10900905	2017000437801	B	N	55	33	551759	FMM	30	0	09	541	661	661	55	541	5.08890593842206	4.42973003466827	-0.098018813979114	-0.00479151590934212	76.074355259965	161.436911021646	3.16485440839829	4.14922581991711	0.296937717404067	1.06795346824898	0.698911928240319	0.824400369938481	6.83332949984091	8.59710624227387	3.16485440840788	0.551803660601771	18.1860989563325	3.16485739905817	1.88086562741521	8.60296620300909	0.409414987783846	23.0372369288436	67.757913533568	89.8406499890374	239.865254835279	0.156127628958386	38.3088799553	119.700706999375	38.2898410339003	49.8962432288263	18.9784652296753
Female	Non-Hispanic White	83	11206903	2015000125815	W	N	45	47	12174544	MFFM	8	3	12	542	544	544	45	542	5.09480670511389	4.29911169725343	0.0157155140712692	0.0166224782585467	74.800697613804	165.907297467098	3.0117317585236	3.69145023896612	0.301197918952495	0.828534334970865	1.11529255140858	1.06735524135797	5.54596860083036	8.18632733384778	3.01173175852368	0.26159309471224	19.9485956997973	3.01173194677626	2.59387496061028	8.18673563445297	0.438701863078805	23.8364408291369	61.4489897982331	95.5463836765935	244.82983008455	0.13634100157737	34.9479597446633	118.043675970752	40.3605327846763	46.6922473243477	18.4340443674894
Female	Non-Hispanic White	82	10800823	2015001309887	W	N	11	38	35511626967	FMFFFM	NA	1	08	543	140	140	11	543	5.02717414270724	3.83786270545684	-0.223974470554257	0.0257615433259148	37.1100653073516	156.481170435133	1.8094911935152	2.36731359977545	0.167842626875099	0.578747735541541	0.500749240460914	0.538190605874268	2.22158520367883	4.91866770161382	1.80949119448993	0.158249321075343	6.19538037937016	4.85393509079807	0.893667539120666	4.91870703008903	0.212489841583133	19.5085636445752	35.6372525365975	50.4781596169271	234.321305777864	0.0893526011291092	20.7852214702073	66.7578372479125	20.81219496427	28.4006807036637	10.6000584814507
Male	Non-Hispanic White	264	15311200	2018HU1067554	W	N	41	19	41342	MFF	NA	2	53	544	498	498	41	544	5.19181401800909	4.56418338987093	0.0170948586590097	-0.0394473788190147	97.6391215373772	172.840056713366	3.41178225315502	4.64252163835856	0.191385434152563	0.915216588603995	1.0869822808085	0.806936175064209	7.99999875980515	9.23583746520524	3.41178225315502	0.591950058468124	30.9149461829075	3.41178225315502	2.34576187259543	9.27418570140232	0.32946952986658	27.618216020992	44.8991208055069	110.005492190169	262.582671189681	0.441369501617103	35.8315457853029	178.498443974578	36.4146660813435	63.1548042753617	22.3968724387748
Male	Non-Hispanic White	169	12500703	2017001100942	W	N	33	77	33	M	NA	1	25	545	406	406	33	545	5.19843491985212	4.52916943223695	-0.27318402697296	-0.0406990304492553	70.5262799258264	173.770574079459	2.57825286903869	3.89753087294952	0.1366865248233	0.92311576578284	0.539852611275196	0.91021820058231	4.68989459242707	7.00841076102169	2.57825286903869	0.325918871811249	23.8804348034781	2.57825286903869	1.97454947222843	7.00841792295249	0.372012622954242	26.3542912616335	31.8445938141218	83.6472264383869	263.642207147872	0.357470975208208	27.7245364792634	131.234687946851	25.5650659260079	46.2070025331402	16.9934069244673
Female	Non-Hispanic White	152	12700600	2015000726136	W	N	62	35	6862	MF	90	2	27	546	750	750	62	546	5.09098073483369	4.3637310354545	-0.156233057569927	-0.00515891927185444	67.188222912001	161.712782725091	3.09585301287187	3.55909860446833	0.283454928245573	0.889791610831432	0.642133941246517	0.89315089054203	2.5164417300062	8.40880347299844	3.09585301287187	0.277665090342294	16.9587542950336	3.09585301287187	1.72001420091139	8.41540098584422	0.463872580457127	20.7026527527784	65.1433130082222	96.6191201789308	240.172609785791	0.154051708362595	36.2370647811674	123.340713979526	39.6670830962298	50.8219847137914	18.588477440366
Female	Non-Hispanic White	46	10603737	2018HU1258914	W	N	9	37	47489	FMF	15	1	06	547	117	117	9	547	4.94031694561803	3.59398752085502	-0.178095950782441	-0.0457343287593509	30.4440803621413	133.564247513707	1.59865242140791	2.15923294882948	0.12726098182245	0.52005041773995	0.347369959034224	0.3920303085479	1.54775264946428	4.29683657237947	1.59865576457743	0.0656660488525994	4.18248919922873	4.34558781875842	0.847040484685345	4.34558782713517	0.183746377743016	18.0435884780138	28.0485727257703	40.215591021995	208.081217710465	0.0652717532900437	18.0332785096138	60.108645291263	16.9473093729583	22.8806470921109	8.31623856355855
Female	Non-Hispanic White	153	12801500	2018HU0262367	W	N	18	21	204818	MFF	20	2	28	548	226	226	18	548	5.09847361014571	4.16597753776694	-0.413239199141148	-0.0197968246605503	42.6376786890641	160.561458051511	1.81460797695725	2.42315507401329	0.181203177264091	0.500530306157331	0.632491235980058	0.550027396003668	1.64896597463524	4.92917431310627	1.81349207586059	0.137488752300047	12.0402121266439	4.03720456926261	1.2705686654996	4.929582555433	0.281297069570724	22.5113675193716	36.4883403919785	57.6115449547043	238.889021695396	0.0880026324587109	21.7361922059401	76.7238485617417	20.7777025252416	28.1125889132958	10.8305836963672
Female	Other	260	15151020	2015000942376	A	N	67	66	676424	FMF	NA	4	51	549	811	811	67	549	5.04076987379412	4.0378666330363	-0.020149998757901	-0.0092452037546658	55.5740649267101	153.166362923961	2.57688595582617	3.14583084359748	0.230855802058141	0.6244375040066	0.928498933078751	0.76420577324169	2.85460895135497	6.99169438782806	2.57211583702275	0.369627114048494	14.0370696378906	2.57211583700942	1.27004918035817	6.99173574043443	0.353899763270871	20.6063616292358	52.2581826465257	72.6277301810899	230.588563745843	0.119820678806057	27.3050858280801	99.3326180329475	30.2546668972729	38.3953033606474	14.8275124160985
Female	Other Hispanic	192	13905403	2014000788079	W	O	12	54	89101228255	MFFFMFF	20	3	39	550	155	155	12	550	5.04809855013718	3.97693676287048	-0.230734431810375	0.00260498564237027	42.3599072455491	156.132270494274	2.00585581630338	2.66225812800183	0.181735293394602	0.5341676763735	0.623674290093919	0.503358914931255	1.99139397394364	5.26561583691897	2.00585581630424	0.168361391864997	8.35514048768117	5.45248141596626	0.893988485430002	5.45248141596625	0.264192750222153	20.1181216928712	36.9308391496195	50.6342603287768	233.929353683806	0.100366847632029	24.3693153384673	81.6741246827419	21.9622589101465	31.3305707892787	11.7307138672686
Female	Non-Hispanic White	153	12900800	2014000261848	W	N	66	21	7166	MF	15	2	29	551	802	802	66	551	5.08896640692703	4.31162526335796	-0.105220466697917	0.0334298857116435	67.11481414006	167.736834957623	2.99055309520517	3.79932805535099	0.296601117277567	1.00839761276102	0.860376595801273	0.942278364264967	3.87593154551718	8.12916493092803	2.99055309632353	0.426940747625456	16.0775071617883	2.99055309520378	1.70339756061768	8.12916613355523	0.470122420088639	21.4422747242636	57.480640998852	88.5422456391889	246.851941576642	0.144724238004867	39.3702258333722	111.547628093049	37.1171756291442	47.6176138113773	18.4555959484772
Female	Non-Hispanic Black	116	11703413	2017000711111	B	N	75	29	3775	MF	15	1	17	552	909	909	75	552	5.06819393869817	4.36081205315755	-0.313243385577794	-0.111365031503973	57.2580742588981	142.142333928886	2.43793731703007	3.1972363222032	0.204706337082538	0.660587362605079	0.730767247311178	0.732158022014763	2.92544071535288	6.62700042689997	2.43793731703008	0.177399909303238	13.1084611918693	6.62700070780504	1.51261675910293	6.62700070780505	0.253081589411528	22.486278280793	43.8591316224648	60.3248565728438	218.025753471344	0.10668284323753	25.598192996157	89.5166917607933	26.0217512903064	34.9339438734502	13.2883280115347
Female	Non-Hispanic White	45	10608501	2017000818681	W	N	60	14	602461	FFM	NA	2	06	553	728	728	60	553	5.09507355633238	4.34676381682629	-0.0524483978745089	-0.00030158056147153	73.2820297804862	163.166634436106	3.12796781318842	3.88019730094726	0.305786099110046	1.08222282887201	0.928201026411934	1.06969310719575	5.44037686597718	8.50265393251507	3.1279678132874	0.503928502020423	17.5089248268076	3.12796781318827	1.81330155066358	8.5026980665843	0.458654389920851	22.4279999530403	64.9001488834532	99.5994265583937	241.79022041619	0.152526447538259	38.4517686439828	129.185805320211	38.598807939863	49.7292177660247	18.9078006751384
Female	Non-Hispanic White	263	15151215	2018HU0920121	W	N	1	29	8401396	FMFFF	NA	0	51	554	15	15	1	554	4.35285099342644	2.29916433104471	-0.0740874761644888	0.00281603017429704	9.25419400654873	77.9187816731671	1.51724300849537	0.568396912769921	0.0285329270583239	0.0760563135744067	0.0369566567019308	0.093614883651759	0.248558450825776	1.51724301182711	1.18533333351946	0.00729376476207265	0.444917659596356	1.51724301183981	0.194565453061074	1.51724301183981	0.0582244311808344	16.5797484046623	6.19863542978929	9.58952804777098	138.898267725832	0.0148712716710955	3.88690712760661	13.3256600743538	4.0200205667977	4.90626521800222	1.93819514828546
Female	Other	271	14802510	2014001161243	O	N	55	11	5655	MF	15	1	48	555	665	665	55	555	5.06731116956896	4.1705260340113	0.574407275530868	0.0396165369487927	115.000135835656	165.162148002326	4.65414178798761	5.80250140547448	0.461005638727376	1.32275655941512	0.82314143185766	1.53062191308009	5.61640987789414	12.6512673716523	4.65414178798761	0.238463047907643	26.3240951279437	4.65414178798761	3.15707390124759	12.6512690493586	0.649297281748806	23.7092033449588	99.2613757392073	144.565857723247	244.004651953339	0.252770455553662	53.6570838383364	190.618156250966	55.9584829425845	76.3599424475594	28.3908061779852
Female	Mexican American	181	13600904	2018HU0370195	W	M	80	20	80	F	10	2	36	556	963	963	80	556	4.96711901159	4.11560343787512	-0.275294056164644	-0.0556813217145028	46.539870797522	135.834562068572	2.19251461132844	2.50164097561214	0.183382364346551	0.635467341808943	0.515197410874092	0.570655806285946	3.20512951929733	5.95966547903983	2.19251461504743	0.169352988710923	11.6232519012651	2.19252594486228	1.40915133489746	5.95987262287002	0.241183973464485	20.2267095311568	40.8303085965539	59.3842479886022	210.728332037175	0.0897386405458429	23.450792069749	70.9095584227959	23.7520766552808	28.1674530558648	11.5506236753094
Female	Non-Hispanic White	250	14203208	2016001043565	W	N	17	77	78114817	FMFF	NA	5	42	557	207	207	17	557	5.09850922766066	4.14321170244502	-0.241278816894756	-0.0157505727591896	49.4980307299664	161.218188388457	2.13376042379058	3.06501027352695	0.212132962057608	0.416604308329958	0.327256977964824	0.571673877158509	1.06708829327493	5.16904003626076	2.13376042379058	0.144999529222182	13.8516679256139	5.80016218627482	1.3729442951597	5.80016218494665	0.334010474513567	22.1975577848712	40.7110541206755	63.5980719086752	239.621477638066	0.10922406381896	24.6487124704484	89.7658908327023	26.5654960918958	34.0453117492646	12.7823706418581
Male	Mexican American	187	13603306	2018HU0044972	O	M	36	33	3436	FM	NA	1	36	558	434	434	36	558	5.13186636404535	4.41506139202404	-0.258764594374981	-0.00723201123862729	63.8346915740744	168.11266048986	2.4546841163626	3.25192058550137	0.141282814055888	0.95903771972105	0.464344264214095	0.690453510319971	3.50791594704116	6.67251900596526	2.45468411636259	0.232527962389341	22.4108362280549	2.45468411636259	1.45503929911647	6.67252322803111	0.192936380663602	25.0052571117241	29.7769222681992	73.2767832803667	257.177563664338	0.312503480752037	23.9558128244688	115.640450724676	24.4735663846649	36.9201444332118	15.782242015292
Male	Mexican American	262	14804627	2016001112948	O	M	21	20	52164721	FMMM	NA	2	48	559	257	257	21	559	5.13855441139381	4.35434679665639	0.118196512204663	-0.00628039559654579	87.5791809108116	169.401902979024	3.20184998197323	4.34032196785809	0.168777758433723	0.902002414321874	0.961466243842519	1.20042929925281	4.77401711831771	8.60953105172009	3.20184998197323	0.438034593911084	29.2728713656089	3.20184998197323	1.85672403323973	8.70353044718396	0.364550944664089	26.3526809200594	43.8096707444038	99.4191475717313	258.655355745241	0.432888650506538	34.4445510262859	157.226590773595	32.7347930534112	51.3303050806468	20.7043911532545
Male	Mexican American	47	10604102	2016000027920	W	M	15	68	2615444713	FMFMF	25	2	06	560	191	191	15	560	5.14003469161074	4.22486581944158	0.435080386594407	0.0746759487065166	105.630399725899	183.958583080329	4.04879215234507	5.79705837525727	0.246212817919665	1.91883490290575	1.64940464724914	1.23877943840702	7.12501986685377	8.80793023317425	4.04879215234507	0.379837175127907	27.619513945655	4.04879215234507	2.84773844294771	11.0057573307921	0.698393867642206	25.0893609134066	58.6901813298302	139.316732847985	275.152082247941	0.559251733204387	45.5811229502165	218.655597581619	45.8089779178935	66.5019061820286	27.8508397826717
Male	Non-Hispanic Black	193	13603706	2015001493483	B	N	61	12	61	M	NA	1	36	561	742	742	61	561	5.16770373687215	4.49578523014777	0.0603225324634604	0.0272167041604852	95.2121693192136	180.35379346464	3.34506787045116	4.48572566159489	0.180155831582467	1.21995699530091	1.40493627269177	1.05422715967084	7.91235017162239	9.09283015668554	3.34506787045116	0.432999655467498	29.5123502282077	3.34506787045116	2.05446116841703	9.09283626302238	0.419983355259676	27.4634491755086	44.5268899074428	104.617441667029	271.09825552914	0.417272897281944	36.5309035911753	169.646345050107	33.6745927985673	61.6738520216143	22.6710516076472
Female	Non-Hispanic White	45	10800103	2014000818079	W	N	33	16	3433	MF	NA	2	08	562	405	405	33	562	5.1084315498461	4.30718180005483	-0.0784043841910215	-0.0442312313944833	68.6332709112195	158.253838784434	2.82854157558793	3.98566747188076	0.286171676693149	0.474737922924012	0.767095470061848	0.835044845797429	5.2641692951393	7.68875468807004	2.82854157558793	0.504518480908147	18.4017736093272	2.82854157558793	1.94692471634706	7.68877316438727	0.351266436005765	23.2645437859451	59.0544532940999	78.299728413379	236.309349453892	0.141698802865966	35.1918032190725	116.534844549746	35.4451799932723	42.7892382806181	16.7102704907617
Male	Non-Hispanic White	120	12001100	2017000374639	W	N	11	22	141136384	MMFMF	20	3	20	563	136	136	11	563	5.00836541630465	3.77223895593605	0.032756316605702	0.0749297557374776	44.9250377312713	161.304707917443	2.08214987008825	2.89658809497207	0.0992257520964972	0.388530711721666	0.588900555844668	0.65753396589769	3.31912521563902	5.65891380622707	2.08214987018514	0.128902933711723	7.3851192962391	5.65986895365605	1.52078739301479	5.65987015598925	0.318810196525728	20.5762747805272	25.9700551819431	62.7773675906328	249.326272474703	0.240564738845128	21.9776422517616	107.04320624092	19.9901695147968	35.0232784613963	12.9783666460697
Male	Mexican American	275	14805915	2018HU0153444	W	M	41	13	354185	FMMF	40	3	48	564	503	503	41	564	5.13874596737102	4.44006089652861	0.0787398821877532	-0.0494268179601585	91.725532783918	162.27933645022	3.25369955516507	4.33329993807914	0.163253414820673	0.924499182068628	0.967987334170934	1.11292666469389	7.08057117772518	8.84444034362698	3.25369955516507	0.508906720334601	29.5964812630599	3.25369955516507	1.63940073617462	8.84447237607045	0.667471127265993	27.1911501749781	43.3936725859177	104.420946591619	250.455272823577	0.411379258704973	32.6296850939029	154.333617143918	31.0993567047867	51.1090274841425	20.3726552443705
Female	Other	150	13000200	2014000658437	A	N	11	19	1131146	FFMF	5	2	30	565	132	132	11	565	4.99590536339103	3.8007727629542	-0.0302724911810894	-0.023042586664596	43.4017720871145	144.439794941158	2.41973402512665	3.41022282190123	0.186472814181506	0.429553527612679	0.681803754259229	0.651684297485987	2.08193287806058	6.18931171693577	2.27726849443822	0.152204540705012	7.98389700626583	2.30640556933701	1.24028300131281	6.19025756695357	0.278109633791874	18.0586978185118	40.8885712159678	61.6041585489535	220.663428601632	0.0924856581974401	24.4746441136608	91.2256926484026	26.3525440661659	34.3318594689888	12.5627468457301
Female	Non-Hispanic White	81	11211702	2016001152004	W	N	81	36	615781	MFF	25	3	12	566	972	972	81	566	5.04321485883873	4.10306622518987	-0.0253341246509685	0.0141023513195479	59.0114858592206	157.168300698154	2.61719436416103	3.16888933734164	0.23819281417368	0.712547462074009	0.511781876898218	0.712228411171548	3.32923345392004	7.11382602652213	2.61703073238828	0.414234221574682	13.3960875530456	5.56603483934402	1.36118280112225	7.1138261365695	0.263727425565257	21.5490258831086	51.5530901152989	75.5035978671415	235.092585692597	0.132111361006227	32.8220111407327	103.387786060987	32.548673625261	41.9483599282193	15.381110993578
Male	Non-Hispanic Black	58	10603100	2016001266743	B	N	25	15	1721235125	MFMFM	NA	0	06	567	301	301	25	567	5.18012632561733	4.44828413104458	-0.125292946451192	-0.0568094256617862	75.4138680574881	167.891325816992	2.76124290965326	4.08563739106922	0.14377324587642	0.869995806471739	0.537871896291971	0.613814018680681	5.86993298159006	7.50370548629021	2.76124290965326	0.519558143305287	25.0016448791818	2.76124290965326	1.62122446525912	7.5058364251907	0.308809281894283	26.3115660320366	32.6535038834435	91.8235089273569	256.923574681063	0.325704375098861	27.1713703014358	124.772275276362	27.5147734200247	48.7337742579724	17.7357099727714
Female	Other Hispanic	190	13601700	2018HU0108910	B	O	36	9	23936	MMF	45	2	36	568	442	442	36	568	5.06641627931384	4.26711532581284	0.0109375371229754	0.0490048313871066	72.0999148243487	166.570911009122	2.98766950283631	3.93362698915661	0.296068925944476	0.466431471529442	0.77167117865081	0.815875486329901	5.29947185844113	8.09839292205053	2.98766950283631	0.225373303849717	19.8095527108656	2.98766950283631	1.8410386546516	8.12132771896128	0.346101908715705	23.1324934889557	59.8047802888906	80.9476184867268	245.563935639361	0.152619762273514	38.731224069967	126.339135231094	40.354697344799	46.3825887481937	18.3415970376544
Female	Non-Hispanic White	153	13200101	2018HU0907783	W	N	37	18	3733	FF	NA	3	32	569	454	454	37	569	5.11107927629658	4.33539083375439	0.352495094135531	0.0224112045773842	108.623299413374	169.608099868154	4.20069559650315	5.41880073860534	0.357751525145142	0.823049704463784	1.50211465595514	1.32563722684878	6.9274939575884	11.4186590051316	4.20069559650315	0.280250112509224	27.3647095569852	4.20069559650315	2.98040863124613	11.4186745058004	0.557176877482209	24.8584077131885	90.7496481398816	108.147471327201	248.914476914824	0.208548113692558	51.3507427569494	180.187661249241	49.3581584207689	68.4275549598836	26.1403486770496
Male	Non-Hispanic White	153	12802100	2018HU1233184	W	N	47	23	26244747	MFMF	NA	2	28	570	574	574	47	570	5.18533731882285	4.47323203271611	-0.179074636890258	-0.00904197450210911	73.2704504399919	177.025775155741	2.6436929241972	3.65510864391541	0.144369792401002	0.720356009842114	0.743901713386219	0.944826635514839	6.27729513470532	7.17698059572267	2.6436929241972	0.395401997345897	24.3541200911377	2.6436929241972	1.42236449342241	7.1863024358496	0.570536345055438	26.7151895249868	37.7020720978785	90.0834263225259	267.337658812091	0.366162272812831	30.5471255390792	134.01784117731	28.1152764058833	49.4461323211924	17.6689669243242
Female	Non-Hispanic White	191	13901700	2016000879886	W	N	35	26	03544	FFM	NA	2	39	571	425	425	35	571	5.10724696629029	4.28174467843874	0.547065227081483	0.0288566355310832	125.062036416217	170.051885927564	4.72306477747301	6.27748744056195	0.407110845559696	0.719879705654937	1.51187781521574	1.45670373593484	6.94471128465567	12.8383957642739	4.72306477747301	0.294359479737765	31.8839809619138	4.72306477747301	2.42905690938878	12.8386211592398	0.805815541953458	25.4790008836443	101.30138021947	133.519527163611	249.402787989791	0.234957213909716	62.8413983690334	211.030130010099	57.4866534911944	75.3624002267286	29.4486380839537
Male	Other Hispanic	196	13603708	2014001262905	W	O	10	12	13104314	MMFM	15	2	36	572	121	121	10	572	4.94685035145888	3.63587592165388	-0.106050756451137	0.0406003009279487	34.1180020793018	146.562308552307	1.78949724850012	2.38381221537302	0.080637068853249	0.624197883572936	0.327155739408986	0.370271570726455	2.16126056770024	4.52251652739768	1.66449107808417	0.113502490378715	5.37571057288264	4.52455585118841	1.03506683298113	4.5245558511884	0.287166442342985	19.4975428470885	18.8204676709603	44.8273119321712	232.032855508897	0.183894573287336	15.235915600604	75.0826158319488	14.6977218772945	23.5628224442733	9.65541544542383
Female	Non-Hispanic Black	43	10603720	2015000224560	B	N	42	61	3742	MF	NA	0	06	573	509	509	42	573	5.11251629430619	4.43985300351819	0.330115114671351	-0.000966954733157134	117.915482541678	165.927233455305	4.58485816548563	5.58751970065811	0.457021068192408	1.25648483526	1.0190360163345	1.65365250711883	5.47418639437128	12.4627174100505	4.58485816548563	0.65341431141353	30.4520758678985	4.58485816548563	2.02307557617974	12.462936637101	0.664518695642567	24.7184580821571	94.3590702361765	151.576306520445	244.851894445355	0.229124784615923	48.334568270109	198.116206007325	55.0396599827659	72.1793706527259	28.0652801895603
Female	Non-Hispanic Black	59	10603767	2017000450440	B	N	7	26	722830	FMFM	NA	0	06	574	92	92	7	574	4.84572537810619	3.37453411170711	-0.2690341890484	-0.0334015142333633	22.3203746475939	123.017160742557	1.26312455091804	1.75398806180682	0.100507710634619	0.0984715924898038	0.205204307513558	0.304351983618782	0.664907774890109	3.4335283217464	1.26312448184123	0.0666003268349883	2.97872448996795	3.43352832562379	0.632185330998693	3.43352832562379	0.0991268529999804	16.6697685706025	22.9283681687145	31.9031071382437	195.631817105385	0.0478161117055756	12.7048248862209	42.2673541752852	12.15129260626	15.639659959695	6.17768343951822
Male	Non-Hispanic White	263	14806601	2015001058661	W	N	4	23	229354	FFMM	NA	2	48	575	58	58	4	575	4.69100953357279	2.94019814627152	0.393151799817681	0.0629037559077365	28.0320905809351	116.037485466823	1.51728457575645	2.09860046227106	0.0623422960186551	0.263780768536086	0.222992424446772	0.291755208449013	1.04359695351237	4.10041362696736	1.51678330638206	0.0676230726521848	4.1586872758528	4.11184419028433	0.772782925951585	4.11184419028433	0.186149367685533	17.5316164696298	14.5757588800577	35.7650484401809	194.751805979964	0.130523974093236	11.514129844006	56.6124664625093	11.3740343293304	19.9072838475569	7.36484599924698
Female	Other	227	14501204	2017000264966	N	N	7	7	3259731	MFFF	NA	3	45	576	84	84	7	576	4.78694802892931	3.13436876210492	0.0357007904014574	0.0141251713021147	23.8091402842225	121.640892527318	1.3081848258134	1.76815457792043	0.0979406079780848	0.28614118568673	0.179575827980622	0.333480038313659	1.11238186286279	3.55594552377208	1.30820311145423	0.0606193991196598	3.10443644988214	3.55600509164007	0.626240318123048	3.55600509164007	0.183749540517783	17.2001841007197	21.9538856646241	30.5082230053161	193.988021202728	0.0488112374986083	12.6188822061629	42.0764274508175	11.8127265251695	16.3205899940211	6.34428689376491
Female	Non-Hispanic White	260	14805908	2018HU0425894	W	N	21	25	2122	FM	15	3	48	577	254	254	21	577	5.10545454454818	4.1791937480948	0.0817481894189474	0.0313192406074528	70.8767134568526	170.165890065043	3.08739866153813	4.27738527582122	0.275325892885274	0.443680839903938	0.939169906607041	0.933684326611972	1.80038790023992	8.3924165812764	3.08739866153798	0.17109611015301	20.5627648673	3.08739866153798	1.60912995005856	8.39241967881526	0.444897978765753	21.9567740440574	63.7454961836317	79.0000095411798	249.528178694208	0.146768866442466	37.8105191063067	143.459223286525	39.751826932777	48.7418035561085	19.2598241229127
Male	Non-Hispanic Black	124	11702501	2017000307801	B	N	14	57	141741	MMF	NA	0	17	578	179	179	14	578	5.14654888586084	4.22470891703445	0.251461075602292	0.0153521615280006	87.8973795594793	174.495865401724	3.64454497959212	4.70875521312782	0.202487501093345	1.46266447491053	1.56653141855765	1.0365113825372	4.83554932680053	9.87647692340569	3.64454497959212	0.262114463818643	21.244966321993	3.64454497959212	2.77255385530289	9.90689963888243	0.387429311219258	23.1175181131435	46.0512611811239	113.65169483534	264.467078455226	0.486064344697807	38.0401258677894	188.723289061529	42.475175044323	64.9269079702377	24.0965540762847
Male	Non-Hispanic Black	43	10603713	2018HU0408350	B	N	28	16	2830	MF	NA	3	06	579	336	336	28	579	5.16461016189642	4.40750286868499	-0.273769436624405	0.00271574119100378	62.4104938594385	175.445052565417	2.34660686061979	3.17801064138064	0.137726935939074	0.486292573305039	0.616254480763271	0.617241193139283	4.47804755465812	6.37857560914828	2.34660686060638	0.401168451306428	21.5278377432818	2.34660754523789	1.50678611626998	6.37873860493447	0.434099854215061	25.5960587208506	32.0620888545623	82.6993812813402	265.545292203826	0.299023337658683	24.2530369945207	124.070142676236	24.1273507463306	39.6231476611763	15.5782601121806
Female	Other Hispanic	56	10603759	2018HU0978161	W	O	32	129	2432	MF	20	0	06	580	386	386	32	580	5.06502224862099	4.26832063949783	-0.0367936482982892	0.0081818318338991	68.8222429374842	159.685152620084	2.95950629648207	3.87962542473452	0.265669715338819	0.60566437276608	0.941582980106173	0.901622929549723	2.2420593916088	8.02972654102723	2.95950629572141	0.591662054340793	19.4898274268517	2.95950629572141	1.96297953797857	8.04477218486944	0.456071715485939	22.2546364361452	62.4732883331776	83.6780995507515	237.910504382366	0.140443117059033	37.5040979253589	116.184447722011	34.1220389103864	45.6663973813234	17.6024408884467
Male	Non-Hispanic White	81	11304006	2015001120090	W	N	44	30	414844	FMM	10	3	13	581	529	529	44	581	5.18409719912274	4.51083498293654	-0.174198371489545	-0.0601832787156607	76.4499754650526	167.991590299134	2.75264328763468	4.03170876273565	0.148235000060605	0.908527629144805	0.849875197232186	0.868191452201594	6.5577493245343	7.47794159613755	2.75264328763468	0.43811318526166	24.9404392998542	2.75264328763468	1.48526397718892	7.48246017743635	0.360239657951518	26.7732955114374	35.6158827256829	90.4871624942234	257.038641912124	0.333261193862295	28.4244742132096	132.37121755425	29.2205041694184	44.7526096133504	17.6883923080535
Female	Non-Hispanic White	47	10604101	2015000220077	W	N	50	18	158501250	FFMMF	20	3	06	582	608	608	50	582	5.09443672581173	4.3014614052627	0.0971534606764309	0.0949882153592147	81.3381263921	179.365377624709	3.5489645584293	4.59100861134792	0.380862136704479	0.66121474207587	0.711639426689316	1.17509920391162	3.08117388523175	9.64640626479372	3.5489645584296	0.733531801810793	20.1350248636135	3.5489645584293	2.22472533538722	9.64708586902253	0.587188010507276	21.9188330998996	75.923323118089	112.817130615392	259.578773805193	0.191533307028193	45.9222601552406	162.20617132856	47.7618595534565	62.8795083046475	23.0308967088792
Female	Other Hispanic	260	14921001	2018HU0370798	W	O	75	47	8275	MF	NA	3	49	583	909	909	75	583	5.025809711609	4.1778176073736	-0.327724866693205	0.0268911484774911	46.9974216023334	156.444428910251	2.0028367561187	2.63769751188316	0.169487928706321	0.483596265853273	0.47249459320747	0.408796536259457	3.91308423615143	5.41062500072619	1.99045814377824	0.203640074874075	10.6269984598459	5.4106262025407	1.20567777282288	5.41062620253816	0.263636946550746	22.6113588969914	39.5333332795347	53.9801387689988	234.280040869908	0.0888640991983293	25.0435340015606	76.3995760076785	23.4676632696891	30.1178079719452	11.6581153818551
Male	Non-Hispanic White	9	10500400	2014001222722	W	N	54	18	5754	FM	NA	0	05	584	650	650	54	584	5.17489685695674	4.50789375812641	-0.0747333484701779	-0.0360565005276878	84.1970941740924	170.517913620768	3.01363371492911	4.40340191506168	0.171495716689352	0.949659410357724	1.18015618565673	0.801723504270935	6.29663661023676	8.17199921630497	3.01363371492911	0.574127307006858	26.6906718246397	3.01363371492911	2.26938284812167	8.19190576388564	0.515656532145026	26.9387285047257	42.8607731131309	94.0570116794833	259.932311891815	0.396848538994384	32.8019799833555	144.822207708766	33.6424527002243	51.7436217348467	19.583519467916
Male	Non-Hispanic White	240	14800100	2015000225569	W	N	30	9	103353012	FFMMM	3	2	48	585	360	360	30	585	5.1800762088781	4.4494611877029	0.0743058759998578	0.00641877712967792	92.182200953786	178.84061425243	3.32455232823793	4.78216683557576	0.171770432895627	0.951931113497082	0.874423079542439	0.974753823848387	4.9157629616658	8.91179983098629	3.32455232823793	0.345927181290927	30.4544520071626	3.32455232823793	2.52401422745381	9.03707018159305	0.53608607758117	26.727703417634	42.8531529291954	109.526791347507	269.39056212739	0.467132261751788	31.7525491941483	170.147766708561	36.7266573585804	63.8073265216539	22.3900755131485
Female	Other Hispanic	48	10608503	2015001421598	W	O	11	12	174743117166	FMFFMF	50	4	06	586	142	142	11	586	5.0213463887197	3.87735761324447	0.228224585457447	0.0285186485889126	60.678060954348	156.001408695577	2.83868722563041	3.8133781892754	0.249691532272963	0.843182525019632	0.713648961976517	0.720066635389751	3.53487010436619	7.69290474496066	2.838687225628	0.201251309648371	9.77402129937251	6.44327565133346	2.01716660893137	7.71635190155448	0.346626097532002	20.3753950792956	55.9881662734626	89.5756703997821	233.782287877545	0.128284496872344	33.2262911062931	112.900173970406	31.8827807350365	40.7017127552541	16.5908698544018
Male	Non-Hispanic White	231	14702800	2018HU0264774	W	N	58	17	58	M	20	1	47	587	698	698	58	587	5.17364066069972	4.48994482212586	-0.280160837442741	0.0102874509168212	67.3419913372285	178.382141532269	2.56836360579793	3.733463954876	0.149004769783325	0.954072899641013	1.11001594841878	0.935522897134601	3.1759226161591	6.88488794473386	2.56836360579793	0.359880616186233	22.6392248899011	2.56839076935005	1.53407971447753	6.98153611850229	0.481837555123393	25.2198043864225	35.210244346563	78.1379163440102	268.872442216812	0.339753337487642	27.0486936742311	130.325524202948	26.2654510491933	41.6666650313458	17.2640548797917
Male	Non-Hispanic White	178	12401106	2016001461775	W	N	3	80	5360363	MMMFM	NA	1	24	588	38	38	3	588	4.57564852172526	2.73584134463801	-0.222498102835828	0.0198527706735488	12.3461372614981	99.037769987234	1.70283917447682	0.990182959631878	0.0249722728765767	0.170377254232734	0.0653168495192654	0.12661150540416	0.351230990690003	1.87387606850678	0.68938427999084	0.0239621588551609	1.90780638562093	1.87387606850696	0.214221952846943	1.87387606850696	0.0575891331954853	17.9095518287563	5.7790616242821	12.701908941835	172.935200408977	0.0648694177333999	4.8944306606761	23.4204188863063	4.60502144513901	7.60195950290059	2.9803673229915
Female	Non-Hispanic White	76	11200500	2018HU0858250	W	N	38	26	386135217	FMMMFF	NA	3	12	589	459	459	38	589	5.10943448840618	4.33972194144079	-0.101587968724664	-0.020048295256912	69.2784556594563	162.290216628323	2.87588077321441	3.70546813960395	0.291381002150466	0.820051028552794	0.959442444114625	0.72961993491501	4.32688503440284	7.79782258215422	2.87588077321441	0.224283045046499	19.2748226028881	3.19516874007095	1.75302060932421	7.81745444664286	0.391274534382696	23.0894741898576	58.1026712203644	76.3527182050249	240.815518141544	0.145741627597749	34.6199595744583	123.966139201613	36.8176861157892	41.3194345602782	17.3139179628733
Male	Non-Hispanic White	155	12702000	2014000890945	W	N	16	30	401641912	FMMMM	10	2	27	590	200	200	16	590	5.17553919719402	4.32121361836709	0.372203180471462	-0.00769319207284898	109.225745354058	175.536325627662	3.90114274716789	5.62531790817172	0.2389489280666	1.21102389308237	1.60117135978994	1.26370429269149	10.6680493281211	8.95669029222228	3.90114274716789	0.440862229915667	29.4618864057716	3.90114274716789	3.03170744410133	10.6044050786376	0.490461663091353	26.9983975037449	53.4018182972182	127.307887910678	265.648895393994	0.494014352399262	43.8002230415106	182.56839191717	40.4648544248708	63.5130894324458	25.908356538986
Male	Mexican American	151	12300200	2016001200378	W	M	84	52	8483	MF	NA	2	23	591	1010	1010	84	591	5.06442866724858	4.14485674993644	0.234474943744649	-0.028238349986975	79.7846949680629	153.882652818278	2.9966633726276	3.95471570798996	0.163331972685676	1.00129949953455	0.780418579395874	0.755515394158013	4.49210491831023	8.14577548116203	2.9966633726276	0.492195911541662	26.3415805672658	2.9966633726276	1.88391746625322	8.14577559143125	0.404280351792448	25.6245103460201	35.5307617586086	81.7416031776434	240.671691512669	0.362379003614043	29.5741666612938	126.461323853695	27.7027295774621	47.6465956556633	18.0303010696086
Female	Non-Hispanic White	225	14801000	2017001215824	W	N	92	35	9292	FM	NA	3	48	592	1114	1114	92	592	4.89410197565648	3.43566240628898	-0.00443955444489749	-0.0127801758791332	30.9144234045664	131.804768308291	1.43780448803378	1.61596629239342	0.112376848542597	0.245463708633844	0.323093424484195	0.32215332198609	1.89807649599617	3.90835771076061	1.43780512597995	0.168028603056645	7.20149185849372	3.90835776924593	0.742976874003097	3.90835776779982	0.157210510543851	20.5011317570813	23.0799110221271	37.2094809919962	206.021979652218	0.0609599526947433	15.48759357934	47.911776876221	14.9076747484483	17.4348329547456	7.40548309210485
Male	Non-Hispanic White	262	14804602	2014001169732	W	N	12	12	12371537	MMFF	NA	2	48	593	144	144	12	593	5.03332432500932	3.84522976327958	0.150294037937017	0.0361656964051558	54.354304019154	159.093172540352	2.68493858274924	3.74140767312453	0.137346521013922	0.774407500527391	0.673303438577192	0.670215466644612	3.24397479249571	7.28989732124189	2.68493858274925	0.162318684929479	10.9827075588664	2.70923834390811	1.4102110604104	7.29841975993097	0.346955653257883	19.2441517166836	35.8195271644846	80.890641947528	246.758100607121	0.359457933722403	29.2152232422782	136.226652081475	28.2413446805062	43.7796121276091	16.5632586231494
Female	Other Hispanic	59	10606502	2018HU0125416	B	O	37	36	17534104837	FMFMMF	45	1	06	594	451	451	37	594	5.07113438385391	4.25937103200562	0.0652218566754663	-0.0395001132594505	75.5347555453718	153.183150962319	3.19134581774821	4.28012008621806	0.258338279537994	0.772202085758929	0.941912439162751	0.889721211490177	3.40940423698351	8.67495864514117	3.19134581774823	0.474516103219029	20.9097921921257	3.19134581774821	1.76268554863626	8.67497734445974	0.391040370040705	22.6686212836277	60.6702716718079	91.916736998131	230.607519000821	0.151096844570893	38.7267810812846	119.223873837294	37.2215678987487	47.0994280134894	18.398708532614
Male	Non-Hispanic White	218	14501202	2016000561186	W	N	32	68	32	M	15	2	45	595	389	389	32	595	5.18187842263641	4.47887670216366	0.164026259827101	0.0515508072702554	103.84536960502	187.434458550858	3.58785884652606	5.25145612627777	0.207366140284201	0.820172556627245	0.976769939798545	1.30505114502371	8.43342049674449	9.7528086738723	3.58785884652606	0.377961755177952	32.5292543480628	3.58785884652606	2.03864354875516	9.75281150556802	0.536839166340611	27.943549355507	48.33717329897	120.928398062625	279.042168883505	0.51902737005657	44.1880359554273	180.901760816003	43.3256821785198	63.3885601592397	25.0290978545626
Male	Other Hispanic	115	11600100	2016000165115	O	O	31	81	29316630	MMFF	NA	1	16	596	372	372	31	596	5.15196878721787	4.45198204614733	-0.214934395707442	0.0379198261851015	69.2032377926292	179.448563653738	2.60210861113762	3.51950851722391	0.157038359867113	0.757829325175683	0.98637193955363	0.661241418805357	3.6217743208312	6.98028728182124	2.60210861113762	0.569703791019185	24.025060130111	2.60211608886627	1.52277257557605	7.07326455333215	0.456449631029747	25.595061211674	36.1748986965949	84.9183730011006	270.077093837808	0.351186249612797	27.0168846201475	140.137763978739	28.1657267740983	45.9497027191835	17.5692482886596
Male	Other Hispanic	259	14804615	2018HU0116266	W	O	65	15	6567	MF	35	3	48	597	791	791	65	597	5.12109033207275	4.37220299237528	0.340453637928977	0.0559316250724245	111.347576671878	177.154451097357	3.92793822051944	4.85668767313225	0.243862796274117	1.40360170255589	0.845605574583019	0.979421867820602	7.05337174844529	10.6696758386802	3.92793822051944	0.461087426812115	34.6157747341529	3.92793822051944	2.56871098534606	10.6772430845201	0.704559455407932	27.3475885873665	55.7588723698858	130.642728385565	267.483386744914	0.549545332806529	41.7480029190282	198.672721140908	41.7752675202886	70.2506992937927	26.2664554537332
Female	Other Hispanic	205	13402301	2017000538564	W	O	70	51	70	F	NA	2	34	598	844	844	70	598	5.04132929186247	4.27508702406434	-0.150989915780851	-0.00904474203213195	61.8119745280241	153.282795179447	2.63127937587882	3.33338275113248	0.233220762777753	0.888907447708326	0.978899727664989	0.573355712462676	2.50841787085009	7.15255454573539	2.63127937584639	0.322957021828507	14.238494206327	7.1525554237611	1.32380966363564	7.15255891295322	0.414727387094259	22.4912244953799	53.6048591300113	70.4965908561023	230.72001589242	0.109127807456901	29.6391681439301	109.504882368698	31.3596790648745	36.5580127096067	15.1772204853055
Female	Non-Hispanic White	103	10800811	2018HU0799448	W	N	70	26	7570	MF	NA	1	08	599	840	840	70	599	5.08363351262957	4.31290146832779	0.153330264859714	0.0769559450068634	87.0281590204521	174.267148437026	3.69479866596543	4.63061402715537	0.365440322887161	0.858041244257491	1.39346709723285	1.13893191598752	5.53995059186586	10.043078488953	3.69479866596543	0.220780389185247	20.1072433932259	3.69479866596543	2.1853398769766	10.0435040734958	0.609651220408378	22.5542358023755	85.5938476259872	109.628495648425	254.025232804127	0.194573633678658	48.9663465149448	149.166235500353	51.9850912993346	60.1693001335936	23.4643022821562
Female	Non-Hispanic Black	154	12401004	2014000072698	B	N	16	55	491650	FFM	NA	2	24	600	202	202	16	600	5.09255635692234	4.19495882827695	-0.0447454375181367	-0.00205367924622641	63.4475379719376	162.471512332137	2.68492097449048	3.33906733755404	0.242982680864592	0.658382151948918	0.710157350517991	0.653879821295618	5.52401011806279	6.99840549373656	2.68492097449054	0.235741586208186	17.2151616377129	2.75071133678383	1.35833054359613	7.29837189580603	0.401046696788641	22.6310634744019	54.5935609471464	72.9189976908748	241.017252692191	0.143342100631659	34.734711583328	116.590009319384	34.0965646585248	45.5203817603812	16.1778069241834
Female	Other	226	14203504	2016000200032	A	N	46	19	10465313	FFMM	NA	1	42	601	554	554	46	601	5.05094332166621	4.14518533397786	0.172596990129908	-0.0391272906471959	75.0220690391721	150.177215140055	3.10403175157663	4.38080577481334	0.27031368096628	0.556030546471116	1.11477719863695	0.740188478059424	4.27358112229185	8.42626825202569	3.10403175168572	0.298691559080858	20.9778644093452	3.1058268601185	1.82146154570555	8.43763310527063	0.361599686319154	23.169233771873	62.6044515174451	82.8877337836676	227.205190902911	0.150585734950828	35.0571078393058	121.897895662178	33.5116629796743	46.6516678501511	17.6313031671417
Female	Other	228	14801400	2015001305687	A	N	37	43	937630836265	FFFFFMFM	NA	6	48	602	451	451	37	602	5.08455457277856	4.25668580140802	-0.19373212665991	-0.0282691026715019	58.1458014763843	157.00622749063	2.2935059654406	3.05436376002422	0.21122068208488	0.750590557862735	0.755377847609615	0.750001637136181	3.73527672031809	6.23439543443218	2.2935059654406	0.226866039076109	15.2380768359648	6.23437815628244	1.23576354939442	6.23439558931959	0.336762870493688	24.3523654842846	49.2516914274373	64.4454669685688	234.910740230837	0.109580432181536	26.9154670899841	88.1492112441329	25.6934049649225	34.580479386834	13.4692296016373
Female	Mexican American	182	13704200	2014000180043	W	M	55	34	55	F	NA	2	37	603	668	668	55	603	5.04962593999051	4.34533479401485	-0.238566286437273	-0.0597491777248974	60.7500865904946	146.91831649952	2.57363095627128	3.09416812701347	0.213258902708965	0.558337934783859	0.495287494464007	0.756679357781896	3.37393607842524	6.99584931594455	2.57363095627128	0.29927336318385	14.5189212222258	6.47719184223825	1.51432004546352	6.99585425524787	0.387745520262942	22.6048165501204	43.1720808706827	65.7651962851572	223.497243871153	0.111487009708207	25.1513545615452	95.177561447519	25.0634504664032	36.8367570440589	14.3799856367028
Female	Non-Hispanic White	192	14201803	2018HU0229422	W	N	18	35	11404518	MMFF	NA	3	42	604	219	219	18	604	5.09773766436699	4.16119394675329	0.118396830417886	0.0452857538668369	72.2108836180972	171.232694536368	3.04570868318644	4.17239169716529	0.284087450934358	0.983918477948753	1.25810731658039	0.801558682144069	2.84773282388925	8.21493764032543	3.04570823647679	0.523637437047573	20.1345361300819	3.04570823647679	1.76316648041782	8.27909335400286	0.428018433994134	22.7090614108294	63.2055429116513	84.9857589839701	250.700518728119	0.145234610586543	36.4926781207082	131.94635798109	39.1041688824746	53.4659176011185	19.0890158694809
Male	Other Hispanic	58	10602500	2014001138768	W	O	57	23	5772455	MFFF	20	1	06	605	687	687	57	605	5.12450071999943	4.42008275050833	-0.131142327630654	-0.0942696331013964	72.8891958443123	152.968357594839	2.70101583241308	3.46133418017097	0.1449204223047	0.969709458530462	0.720254697151685	0.849541862723819	5.46219362762713	7.34210532365763	2.70101583241278	0.22547698706243	24.0570344925893	2.70769323808082	1.76564626956447	7.34212223319584	0.484996571010044	25.9858454621502	29.434790849313	79.5542795540636	239.598428194242	0.338426189500681	23.5408269684068	125.73841299516	26.0559284510961	40.2350664351391	16.1789786993466
Male	Other Hispanic	187	13602902	2017000705977	W	O	30	51	3030	FM	NA	2	36	606	369	369	30	606	5.15105543889163	4.43511269694198	0.0507471663776345	0.101820799532695	88.7532336619717	191.115171491937	3.22461190852339	4.77484986323476	0.173133898195787	0.921292496298968	0.747374109698945	1.23153407414459	4.54256025516424	8.76403827137084	3.22461190852339	0.241380571253063	29.7412945479549	3.22461190852339	2.15899119076816	8.76540395476973	0.34178028826561	26.5236946893909	46.2517795138581	103.811273884134	283.14189556464	0.451337912234306	38.1711562940503	185.574349163456	33.3398811687851	59.3098433341917	22.8255682059906
Female	Non-Hispanic Black	151	12201700	2016001184979	B	N	28	36	3028	MF	NA	1	22	607	338	338	28	607	5.10273918432239	4.41860676198804	-0.00174080331235447	0.00450153477170941	82.8362658349298	165.213853923666	3.3564532212312	4.56961127445249	0.313027844065437	0.630252617899259	1.01114406965248	0.994231481881427	5.43370226591706	9.12378575972738	3.3564532212312	0.393806273669472	22.1342431503544	3.3564532212312	2.25765939906552	9.12378579934104	0.357508603047504	23.679702166248	73.8730101899139	99.5019158031526	244.061941071217	0.16333646593922	40.1832727017933	145.420531458362	41.5143254486322	46.8743085792185	20.4795622072107
Male	Other Hispanic	156	12901701	2015000451484	W	O	18	26	1647185219	MFMMM	3	1	29	608	223	223	18	608	5.15825028961833	4.31747169299389	-0.171932022894167	-0.0083204233210552	63.1516937880131	172.419397482035	2.4582944871824	3.28190315175915	0.131270319801798	0.801620100956558	0.879140465536444	1.04818350808352	3.19158447676097	6.25304847293834	2.4582944871824	0.322718845457271	21.1814545545038	2.4582944871824	1.91871397326761	6.68233723350897	0.330004084029855	24.6892305284364	32.576899752021	76.7134218147818	262.103218690496	0.336539686722642	26.4570433000326	109.966458760668	26.12428530276	38.4089125155516	16.1081724394902
Female	Non-Hispanic White	264	15500100	2016000534162	W	N	17	24	1517481944	FFMMF	15	3	55	609	213	213	17	609	5.10121166501117	4.15372677240922	0.27214399205184	0.0275600931285677	83.5855588767946	168.809651580983	3.49925449317319	4.69240838935585	0.318485681807196	0.935183819608714	1.40292366682932	1.04324687781205	2.90559073883012	9.19614160750091	3.49925449310834	0.505015584401569	22.7859019350679	3.49925449310834	1.99346382357489	9.51195955430211	0.551323529651712	22.8866761595687	71.2513716141656	106.376651925343	248.035115081075	0.169803001282295	44.7294530892791	149.394319519855	41.996980552682	55.1727785586915	21.6984497724024
Male	Other	228	14800600	2017000626719	A	N	46	38	46252224	MMMFM	NA	3	48	610	553	553	46	610	5.13761383961974	4.29199202007502	0.163585018081677	-0.0408078758195125	86.1058228577392	163.498851165223	3.14302163881374	4.58670884691752	0.177111488010658	0.856731113820402	1.07218275496373	0.515491857042909	4.58006074376628	8.5395187675339	3.14302163881373	0.575630389755925	28.6914023100476	3.14302163883658	2.18872347413818	8.54361860703931	0.486830119347381	26.3958733832447	38.4636605501093	91.5207508270142	251.865562690382	0.394067246941726	29.6561190279336	155.722459081972	35.2873965118047	51.7862669209598	19.7904728401967
Male	Non-Hispanic White	154	12500304	2017001226964	W	N	14	26	59661414	FMMF	NA	1	25	611	179	179	14	611	5.15014190278977	4.16693049931514	0.177948102648818	0.023941309251642	77.0826792254057	176.634603545436	3.26949355359355	4.39458728416917	0.18171292200139	1.01428892830407	1.28697858903595	1.17885783577414	6.2885727202461	6.74780386642392	3.26949355359355	0.359304438075576	19.0472084544691	3.26949355359358	2.42951490438639	8.88740438833515	0.343468507214817	22.576336200658	43.8724662643901	99.4257822128396	266.894486848471	0.39306666009314	32.4200356521407	160.641093727916	34.185838076028	58.1737485753562	21.8152451060183
Male	Other	261	15311608	2018HU0418169	A	N	26	63	2626	MF	20	2	53	612	322	322	26	612	5.15577986372452	4.27898823350043	0.0800679206909756	0.0531928370448272	78.1833066012872	182.906062389106	2.80933887088949	4.03208973301494	0.164761561637881	1.14664387014476	0.459780906310386	1.10771724410778	5.70315719873783	7.63414237849401	2.80933887088949	0.307508562064725	25.9125620594383	2.80933887088949	2.04466175492716	7.63657480147605	0.473111139761144	26.829788499859	38.0774117931115	95.7509060327032	273.970521956212	0.390333963075652	28.9216862898208	149.540862494923	31.9967968054473	50.0672903846286	19.2419009202367
Male	Non-Hispanic White	46	10603711	2014000088290	W	N	19	16	455220141719	FMFFFM	30	1	06	613	230	230	19	613	5.18498666259863	4.34320683491743	-0.448577036140836	-0.00223238623760621	49.1378590995681	178.172873132924	1.90547417618446	2.81414261310948	0.102775968802789	0.484565795551968	0.857568236137496	0.689721045040656	3.05640498382904	5.17663046599272	1.90547417618446	0.327783886744574	17.0241084185829	1.90547804888558	1.19527432457149	5.1796154407063	0.206714009712422	24.7877328882064	22.3463362082903	55.3763703096978	268.635837418806	0.248596736884586	20.1258975222016	91.2690057522039	21.6701749756534	30.5986360078122	12.7969662749805
Female	Non-Hispanic White	117	11902100	2017001173237	W	N	72	21	7372	MF	NA	3	19	614	873	873	72	614	5.07939163719314	4.32634037071969	-0.215593393931533	0.00245417084477102	60.9922603605474	161.071088021107	2.78121539015598	3.59252869874748	0.259761093548236	0.569938648238566	0.636602856698066	0.532678729677346	3.63849618975592	7.56012698610341	2.78121539015598	0.380531292209237	15.0090038191052	2.79533919905114	1.72565637549258	7.56012725391808	0.415090227361913	20.9300743755509	57.3692199840982	78.9006896725573	239.457480497848	0.137198919042661	31.7419349589245	110.817334350996	33.048191185867	39.9292124032459	16.6495707512147
Female	Mexican American	151	12101706	2015000568628	W	M	74	26	7468	FM	NA	1	21	615	888	888	74	615	5.02869414799407	4.22950991204969	0.251260652709571	0.00823214804898358	88.302689407243	153.995948872216	3.81439965515668	4.72089065963218	0.361832354745662	0.77718193982058	1.04097107710069	1.23010785389309	4.56626942909256	10.3663935002464	3.81439965515673	0.596211097865272	20.2252587949278	3.81439965515668	2.35046610679047	10.3686132690921	0.61027254626274	22.1498262873075	70.6987964837392	109.24780177525	231.524623443794	0.174931880977418	45.2417995171218	142.208142119989	45.8187184622984	51.7295545276721	22.0781860956072
Male	Non-Hispanic White	153	12900400	2015000182693	W	N	50	22	475025	FMM	45	2	29	616	600	600	50	616	5.17727068269973	4.52984229132755	-0.0653806719477917	-0.0647893885695962	86.8742455368871	166.081942176221	3.13458907774371	4.64691060440838	0.169771207984554	0.726556779052001	0.95371098509314	0.637161805277902	6.50713827154442	8.46556777608488	3.13458907774371	0.442158821425085	27.9477474018639	3.13458907774371	2.18128981907736	8.52069652939462	0.338371348439911	26.7147158310842	35.9974913208375	93.3160769644634	254.844093851797	0.377635368333961	30.3357131086553	145.119149709872	30.8699036066539	54.8603208558446	19.9707878278834
Female	Non-Hispanic Black	118	11703204	2016001313180	B	N	0	35	35033	FFM	10	1	17	617	9	9	0	617	4.24181884102973	2.0974999972527	0.192277305436238	0.0096022303513668	9.8727388039558	70.205107962349	1.69926809356604	0.248092835052346	0.0315047331514589	0.111770206823328	0.0304008246599196	0.0987845551382608	0.0911153608634044	1.6992684698574	1.40201117386208	0.00766913671937201	0.480845577613899	1.6992684698574	0.228200697440423	1.6992684698574	0.0552000608864606	15.7931998174294	6.78536678531472	9.85315261978163	128.452259530594	0.0171017880285591	4.12411975573439	13.6272238571593	3.71916453582022	5.1533364549395	2.00747097134163
Male	Non-Hispanic White	47	10604702	2017000890087	W	N	54	19	485413	FMF	NA	2	06	618	650	650	54	618	5.17489685695674	4.50789375812641	0.102882838621374	0.0406355068406717	100.562215609168	184.109808291566	3.48886177267657	5.02598536941808	0.218657100034285	1.46346162888905	1.19874019478566	1.21480104391013	7.8806080196685	9.4695134232814	3.48886177267657	0.543860983815489	30.6670953645286	3.48886177267657	2.3898700929959	9.48370918415323	0.560625631700585	27.8237890066992	44.3280238365656	129.000417121964	275.321708707285	0.503527282066485	42.1452437523666	169.455963509332	36.3571561070735	58.2904957685671	24.0139846174211
Male	Non-Hispanic White	156	13200102	2016000303769	W	N	10	17	101424344	MMMFM	20	2	32	619	120	120	10	619	4.949587676935	3.59803402034031	-0.2034948961578	-0.0460680680389194	29.8009157880716	134.763259932037	2.22394840914281	2.23151592503891	0.0712457023999139	0.359748964658055	0.143292152132005	0.357811274506602	1.3187181127805	4.07177959807333	1.49795907948975	0.0765917263098553	4.69616312056382	4.07187494555222	0.815496034682341	4.07187494555222	0.196811777002955	18.894333041109	17.1396762218842	38.7722913472291	217.877003098346	0.156539243783884	12.5509555981994	58.1024345558163	12.6025405333902	21.3330671195872	8.15927087507957
Female	Non-Hispanic White	156	13401201	2015001229370	W	N	54	18	25456526	MFMFF	NA	1	34	620	659	659	54	620	5.09424911543098	4.35996539289405	-0.213813114603694	-0.0572405411642837	63.1903928853618	154.008619906606	2.85982606797871	3.51146766815448	0.233242844330448	0.850141981575406	0.542462494546746	0.850121266389744	3.16848899935593	7.77381053130267	2.85982509724203	0.431163198016234	16.1830017446386	2.85982509724203	1.60257601240191	7.77381059440408	0.337271031068068	21.0958942371342	58.5763108394768	83.4394087474907	231.538910960682	0.137246946375256	35.6419560358364	113.045889159071	32.7766420736209	39.6511320343892	16.5540197138361
Male	Non-Hispanic White	58	10603739	2014000227564	W	N	6	22	276646103511	FMFMFMM	NA	0	06	621	83	83	6	621	4.80611306184923	3.18217313908675	-0.108865431138104	0.0215191357153875	21.6132749719933	124.914836557222	1.15198243265026	1.82325662655441	0.0449913928580678	0.251356808294391	0.111223634248997	0.259928711997643	1.10918613759199	3.11804016458617	1.14715146023565	0.0631279567130126	3.22595414163188	3.11828096884811	0.561070014822479	3.1182809688481	0.0888251334025325	17.7465323075143	11.4917182449326	28.2628607522024	205.822704222442	0.119765997580772	9.33477570693483	47.3929811805874	10.3610890894692	16.5970023293759	5.90274539245926
Male	Mexican American	115	11700501	2016000553193	W	M	50	14	5058	MF	NA	3	17	622	600	600	50	622	5.12554748851657	4.39322298213666	0.0195335561046	0.00527403020419936	82.4965552762195	169.156025821349	3.0008436434594	4.01529179319944	0.180515165562728	0.456866281475598	0.826955914708693	0.707845785405956	6.34396967211328	8.15629967130281	3.0008436434594	0.383443056064804	26.9808670903782	3.0008436434594	2.2489302943576	8.15713850367271	0.399772089266835	26.4911208573055	37.9887643130984	96.67372331628	258.373737055933	0.395512488399873	30.8482473301517	147.342718522833	29.7836117884784	52.9480920400625	19.3834796620287
Male	Non-Hispanic White	128	11703421	2016000983233	W	N	52	14	26482452	MFMM	NA	1	17	623	633	633	52	623	5.17731940125462	4.51151888052126	-0.259667856278626	-0.00705465623870007	70.2352993393816	175.961416225988	2.63193106828121	3.6089978039798	0.146248349326141	0.542054495583218	1.17303990200021	0.953494254429007	4.45370002934104	7.14453248983784	2.63193106828121	0.296249514107977	23.5910278577004	2.63193106828121	1.70389610678295	7.15433039654359	0.251843944821124	25.6858430244714	35.268022716376	86.4761077226481	266.131234442448	0.373903278950816	29.6056254246333	136.861733717369	28.1591810951665	46.8354052052757	17.5109766042277
Male	Other	118	11700104	2016001005734	O	N	32	69	33236	MMF	NA	1	17	624	388	388	32	624	5.15299818742177	4.37559416793044	-0.268584883917164	-0.0378132803535241	60.7647155408949	166.531571001149	2.22803364623166	3.55012083148787	0.123384404422312	0.655712368718982	0.902811156936639	0.745931547005525	5.04524267922382	6.05642301614231	2.22803364623166	0.265545254419962	20.3289598380368	2.22810033703867	1.32347562172647	6.05642337369708	0.435350129089441	26.2727997818472	30.190200641225	65.7438894541297	255.361367957428	0.287820070998456	22.2434215136952	107.387163001838	23.599333611413	36.7522189296908	14.2238429939223
[truncated: 4,376 more rows]
[truncated: 76 more columns]
