# Supplementary material for: The Residential Population Generator (RPGen): Parameterization of Residential, Demographic, and Physiological Data to Model Intraindividual Exposure, Dose, and Risk
Source: Toxics. 2021 Nov 12;9(11):303. doi: 10.3390/toxics9110303 (PMC8625086; doi:10.3390/toxics9110303)
Supplement: Supplementary file 1 [file toxics-09-00303-s001.zip › CaseExample1000.csv]

gender	reth	pool	compid	recno	race	ethnicity	age	pwgtp	ages	genders	commute	cars	state	row	age_months	temp_age_months	age_years	num	mean_logh	mean_logbw	logbw_resid	logh_resid	weight	height	Blood_mass	Brain_mass	Gonads_mass	Heart_mass	Kidneys_mass	Large_intestine_mass	Liver_mass	Lung_mass	Muscle_mass	Pancreas_mass	Skeleton_mass	Skin_mass	Small_intestine_mass	Spleen_mass	Stomach_mass	org_mass_sum	Adipose_flow	Brain_flow	CO	Gonads_flow	Heart_flow	Kidneys_flow	Large_intestine_flow	Liver_flow	Lung_flow
Male	Non-Hispanic White	151	12500200	2017000100635	W	N	72	96	'697247'	FMF	20	1	25	1	867	867	72	1	5.15632274934952	4.46997515697075	0.181303472762134	0.020513660178327	104.718796578419	177.121583560399	3.62290375929536	4.64937441033605	0.207787513216167	1.26588384691598	0.649123024987163	1.28465001041195	10.1008075927971	9.8480710661237	3.62290375929536	0.219794477875599	32.0060615919674	3.62290375929536	1.62687396821426	9.84807337502408	0.689532939104216	27.9046586759969	49.3422844293445	107.177601049552	267.446166155983	0.476019011816316	38.2619531967924	189.358421959011	38.6098814396444	65.9904254596423	24.2232930193911
Male	Non-Hispanic White	57	10607313	2017000444786	W	N	55	49	'5824552124'	FFMFM	NA	0	06	2	665	665	55	2	5.17610329237358	4.47539984538268	0.209932208260038	0.0223118707881721	108.346243100433	180.985182479712	3.78849961048815	5.06147763194645	0.218154891291576	1.06577742403372	1.3446215201098	1.0876797413388	6.63076331002913	10.2472976296969	3.78849961048815	0.597770033983569	33.8491938711985	3.78849961048815	2.98951249130417	10.2982096483059	0.509710575401488	27.5987209291208	55.2578893092461	127.068444183774	271.809747351222	0.480550695180547	41.239762770699	178.713969716975	42.0102855115274	68.1380072484053	25.7437780491747
Female	Non-Hispanic White	9	10501000	2016000458635	W	N	44	29	'395044'	FFF	NA	2	05	3	529	529	44	3	5.10858581833344	4.29780567584189	-0.147805723737626	-0.00914310728574606	63.4339972599055	163.930525168518	2.67224823493974	3.34461083085564	0.248126355553929	0.450497812724375	0.779176248994706	0.900445991608817	4.43197768273383	7.26371069143778	2.67224819129112	0.381333958948597	17.4751497298883	2.7144359104811	1.84774341994556	7.26392369949534	0.349085240874607	22.738063502799	54.733531855782	71.8721584210855	242.638709282652	0.126775495636947	31.9105240218886	102.466433748526	32.6864464250696	40.1946498465664	16.2097713003926
Female	Non-Hispanic Black	190	13401904	2014000770460	B	N	40	25	'7716093940'	FFFMF	NA	2	34	4	484	484	40	4	5.09765159752615	4.44554813015765	-0.285129468410095	-0.0509179613027915	64.0983525114939	155.513669766742	2.6734363580597	3.5392631282687	0.240626895120524	0.252010703787726	0.620050555319149	0.728845084164221	3.67595966230308	7.26543017810644	2.67343633055625	0.229604099773946	17.6161632621972	4.72534076989938	1.45348189029394	7.26715334942455	0.410059290035345	22.976016102962	55.8330354798933	67.6839698028075	233.233882526052	0.105201727479674	29.3395230257159	99.0084330024159	32.3222923600515	39.2309625695637	15.5883983765045
Female	Non-Hispanic White	175	12102300	2017000929051	W	N	21	30	'2152'	FF	NA	1	21	5	261	261	21	5	5.10743698956836	4.20390920148202	0.134024554453115	-0.00682182555340195	76.5492064739102	164.122838716442	3.21712678722658	4.1583230840021	0.297842400368705	0.716427456961115	0.885834470835853	0.832866122116239	3.24197334930543	8.7439728560421	3.21712678326427	0.519855284803735	21.279194015098	3.21712678326427	2.21531466540838	8.74505722251098	0.469418797350495	22.794277201671	63.54673930651	107.745391285049	242.852164974936	0.159291299865313	39.2720605969649	135.883302228534	40.6520681729702	50.0086347168122	19.5321551078646
Male	Non-Hispanic Black	192	14101305	2018HU0549443	B	N	32	21	'020065327234'	MFFMMF	60	3	41	6	387	387	32	6	5.18595770446721	4.48669490458138	0.0209366591353162	-0.117211520494227	90.7067307879528	158.974877083679	3.32868922780867	4.62082192801243	0.180633344284198	0.944748430561518	0.644997571923489	0.875481966500125	4.03695403647875	9.03417539578924	3.32868922780867	0.573492999027314	30.7247475977526	3.32868922780867	2.08689296599757	9.04831544052272	0.429789869679001	26.2499847778419	45.0301483829032	94.5616662958043	246.620478063323	0.446309164315697	32.3218781888165	144.405191459615	32.3584465927116	51.1449541514975	20.5230732171602
Female	Non-Hispanic White	263	15151224	2014000493099	W	N	53	22	'532400'	FFF	25	2	51	7	636	636	53	7	5.09464741197407	4.29079499313457	-0.0340369167642661	-0.0205542788952651	70.5807946028068	159.827184251464	3.11186419226704	3.65851441231052	0.283625912703015	0.916799543159336	0.568478752297087	0.85075146216069	4.44653482996433	8.45890554191536	3.1118640990627	0.2504898294615	17.6947303686464	3.11435048419538	1.72040581325684	8.45892358547418	0.49971315915792	21.6811944086517	64.0104414016572	87.7225873832925	238.069193501238	0.149212226922439	35.2179688575537	120.260351626749	37.0329619864162	49.3156765704404	18.5209744083816
Female	Non-Hispanic White	22	10102600	2015000361491	W	N	9	11	'64096806'	FFMF	NA	1	01	8	116	116	9	8	4.93717181939979	3.58391292069787	0.0553370975186646	-0.00626388628635172	38.0632792518872	138.50520873476	1.94642012470265	2.60586592586601	0.168945008616717	0.455120283336904	0.359018518819986	0.52086333086041	2.16611899252726	5.2804133131628	1.94642012470265	0.106274736122461	5.10629414169546	5.29091840173097	1.17177863100051	5.29091845552615	0.219393898990788	18.5555310841937	36.4797738389893	48.0076811538588	213.82810839104	0.0758375780506053	21.5148194377062	69.9107034694694	20.6829933142375	26.2166330208539	10.4049833349855
Female	Non-Hispanic White	225	14702003	2014000203301	W	N	53	15	'5353'	MF	NA	5	47	9	637	637	53	9	5.09495944505412	4.29333992243291	0.176373212917344	0.0554237579359764	87.3316670516976	172.497579241459	3.67787160496033	4.45565986509784	0.35365123667692	1.09968403604497	1.21447696891242	1.23694104388156	5.26384484755064	9.99580284702587	3.67787160496047	0.164115901838944	21.1512459374054	3.67787160496033	2.13558157974715	9.99749154535409	0.455535874545753	22.7451647126326	77.9658581987432	111.640575687451	252.088171406279	0.187573650488409	49.5519470530186	166.567681836906	48.600721444944	58.6054838414323	23.1786981890381
Male	Non-Hispanic White	84	11212100	2016000964254	W	N	2	16	'0229290215'	FFMMF	40	5	12	10	28	28	2	10	4.51182579385893	2.6256145447487	-0.0453647532173946	-0.0225138956933505	13.2004351047654	89.0601423422199	1.90769075657109	0.956773585837496	0.022916884103999	0.17463987866334	0.0820034383647405	0.0954059855303546	0.310738155385818	1.90769075685446	1.19896517688459	0.011054408114554	1.97366437947823	1.90769075685448	0.234589960015043	1.90769075685448	0.0735090234810482	18.8093917969189	5.60521106602456	12.6763459309072	159.696464173389	0.0565821226959856	4.48181425309208	20.6945986800493	4.37400851553241	7.08013136351088	2.80187530057009
Female	Non-Hispanic White	56	10606703	2014000430580	W	N	86	14	'868663'	FMF	20	1	06	11	1041	1041	86	11	4.97075859870087	3.77876436952676	-0.118677522771661	0.000189616888132006	38.864717999417	144.16352067944	1.76144809001712	2.17293356377384	0.139641468505412	0.38839008872183	0.591126446057373	0.481433014927704	1.68675260220685	4.78795287411304	1.76145202286509	0.176655247330285	9.12353408961817	4.7876412096877	0.991710002248057	4.78811233486736	0.246952239786666	21.0640722934701	29.455097413536	47.5052194490643	220.346800763655	0.077972976132323	18.3163627852766	69.6782581913462	21.1804823227113	26.0276228628442	9.70323628366305
Male	Non-Hispanic White	194	13604112	2016001344714	W	N	67	46	'67'	M	8	1	36	12	807	807	67	12	5.16377673313757	4.46822490832328	-0.212737721413104	-0.0202673327646129	70.4911511903585	171.315930791576	2.57250779302097	3.69849146644452	0.138101132565433	0.882162592466164	0.407700308890821	0.791588370416676	6.63866901803022	6.9927812809196	2.57250779302097	0.256023033241213	22.5986027699004	2.57250779302097	1.88968607925325	6.99280118733132	0.391578097332797	26.4017250332909	33.9375801018535	87.5011011587845	260.844134001607	0.341017049097037	26.9701120781026	124.037162218378	27.2748785849761	46.4719229520129	16.7755891870735
Male	Non-Hispanic White	188	13604103	2016000647643	W	N	71	31	'7071'	FM	20	2	36	13	852	852	71	13	5.15804767430423	4.47355479202982	0.18333548149716	0.0827065977086683	105.308093077946	188.812464666766	3.65981480359708	4.90389535793935	0.19373884910262	0.993235674643703	0.821970870444028	1.41637587299208	8.69815940213503	9.944572851819	3.65981480359708	0.424668157289564	33.1239856495074	3.65981480359708	1.75222466085327	9.94840798950782	0.333416982017562	27.7741590023745	52.4232446903703	129.385088758239	280.579384307456	0.510839588574354	40.4610416069205	190.239453571628	39.8057321801533	62.592321016056	25.6717146068146
Female	Non-Hispanic White	8	10400105	2014000859651	W	N	67	18	'6567'	MF	NA	3	04	14	810	810	67	14	5.08400024833711	4.28174668369536	-0.183877413894526	-0.0103708067749759	60.2118555999101	159.753090921544	2.81172560335867	3.59862756379288	0.261770541221833	0.494330279495725	0.761133942600169	0.595934451468883	2.14470001971069	7.63377900653163	2.81172560335867	0.258376113623511	15.4601940280849	2.81172560335867	1.73387055723136	7.64306261409246	0.422110915869232	20.4145560747413	59.1202108756592	79.7463778277075	237.986414896917	0.123874552051156	32.5175097709794	117.362174417859	33.850437039913	39.504505712347	16.72881240043
Female	Non-Hispanic White	80	11205301	2016000491613	W	N	84	25	'8684'	MF	20	1	12	15	1016	1016	84	15	4.99701086686676	3.89626504186847	0.185319267829973	0.0684347001225712	59.2392488592655	158.451026894391	2.65754278821167	3.05376058066181	0.238170868444221	0.800114017833231	0.464853091658979	0.911722523979773	4.68770873034001	7.22148112053969	2.65754279408485	0.242911996458147	13.88123515667	2.65754278835219	2.0581451221146	7.22395026936429	0.425774808844519	21.2909859145219	57.1073144657069	75.3107584870017	236.530150448779	0.124138693593711	30.4942523517269	114.772731405527	30.7489645415655	39.2628089451882	15.7147248879943
Male	Non-Hispanic White	156	12902001	2015000756571	W	N	11	5	'0451091143'	MMFMF	15	3	29	16	136	136	11	16	5.00836541630465	3.77223895593605	0.153193016379921	-0.0135657688511529	50.6749635128936	147.643361696498	2.61790375419077	3.67688298726037	0.126817765468969	0.79832961499634	0.459011737187125	0.732726418062806	2.487194216549	7.11244626583005	2.61790375419077	0.319948258171801	9.30357060704933	2.61790375419077	1.45563564558597	7.11620020367149	0.379462446754234	18.3570766044214	29.0619275414394	78.6036577594537	233.315292729397	0.304623932580325	24.2995080806067	104.475152830076	27.9703980306644	39.3900462022071	15.2699245186602
Female	Non-Hispanic White	247	14203004	2015000751231	W	N	51	22	'5149'	FM	NA	2	42	17	619	619	51	17	5.09882684277039	4.28460775869603	-0.0074126790356241	0.0466328895303018	72.0380952409465	171.650379758363	3.13010187175527	4.19095318277737	0.295380908065063	0.943795254864767	0.962179791100184	0.930386937872847	3.76681487580755	8.48839335786287	3.13010187175527	0.490816329086076	17.7182921224818	3.13010187175527	2.0802000096898	8.50849903921675	0.544106837785836	22.0146168375502	61.7808060203236	99.6394243545027	251.159026401568	0.151896354734949	38.2889076656319	128.094917088622	40.0800803051849	51.2777624622874	19.6538334661945
Female	Non-Hispanic White	154	12401300	2018HU0990100	W	N	57	26	'571729'	FMM	15	0	24	18	686	686	57	18	5.0922533808601	4.2798758417027	-0.0827182385078672	0.0384302069607059	66.4970511583291	169.13269558749	2.86626371409362	3.51017954829946	0.256827184819158	0.655849135395035	0.654653708866952	0.713302739223099	4.10144270188589	7.79128826381929	2.86626371409362	0.436541498315148	16.3614580850339	4.38468622823994	1.9047659704885	7.79131256959197	0.377842395090274	22.1999068443556	59.9293812047929	93.9860768344314	248.391020853024	0.14497427454587	38.6173653106098	114.810867219098	35.7547868470179	48.5618458546476	17.7988542494423
Male	Other Hispanic	272	15151115	2016000875509	W	O	38	34	'3834'	MF	12	2	51	19	466	466	38	19	5.13548939406541	4.39707598831918	-0.0534964145897352	0.00124207646785035	76.9826116580698	170.158689712004	2.79684017324572	4.01853944283165	0.156292719251124	0.750808110024407	0.973530377429455	0.689212544262648	5.2085591533067	7.59592931241787	2.79684017324572	0.393952364353298	26.1633512847737	2.79684017873335	1.77524414877781	7.60259982003237	0.347752818584987	26.5248519362948	34.772220732747	86.8905943069085	259.521511162097	0.336011791038525	30.4090408643196	144.585965976994	29.278614373133	46.5012799815533	18.1460047059898
Male	Non-Hispanic White	116	11703419	2014000578694	W	N	66	10	'6665'	MF	NA	2	17	20	798	798	66	20	5.1641006621769	4.47127570502901	-0.393789685261768	-0.0754031601304592	58.9969660538393	162.178487277975	2.25467088560648	3.02079966227288	0.131022462470018	0.750337200434593	0.838714102343124	0.641571715451745	3.89200135527493	6.11702599882974	2.25467088560648	0.372436997616628	20.0265095183517	2.25467088560648	1.41882276487098	6.12883089712849	0.38832897643545	25.1665533672645	31.0973446690749	65.5258913481344	250.338528895583	0.273552531407403	22.4994618332273	112.370963785326	22.1162994536124	39.2025615366801	14.1107748161607
Female	Mexican American	189	13902200	2014000219668	W	M	78	52	'7879'	FM	NA	2	39	21	937	937	78	21	5.02453639807236	4.1491173270825	-0.0827414718550439	-0.0140130406555775	58.3451277739038	149.98321043778	2.69094165437374	3.44471038681638	0.239637667659109	0.529157490974017	0.844731032553853	0.855942288811073	2.68921868090857	7.3094856216689	2.6909416520987	0.456202391547792	14.1817730062907	2.6909416520743	1.97669708500719	7.31473779427406	0.359910994172894	20.6820486348647	52.8313156160088	69.549883401249	226.985021033645	0.127010897148352	30.2757203794294	92.5032738990362	30.9765076181554	36.2101298503251	15.2700861874099
Female	Non-Hispanic White	45	10607315	2018HU0728685	W	N	63	13	'6394'	FF	NA	2	06	22	767	767	63	22	5.08807204916085	4.31425573659953	-0.0514995323421187	-0.00165812490945104	71.0054194391656	161.808562622214	3.10608456300473	4.14568352091969	0.274850565435816	1.02913848949965	0.876414939984839	0.880547782857366	4.29463034740951	8.44321074357322	3.10608456300478	0.390011636133786	17.1346570591183	3.10608456300473	1.87685713640004	8.44321322527232	0.426070391687699	21.8601050611698	70.5477856989506	87.1558785366498	240.279289688263	0.156267151592575	39.469256816766	124.896324007286	39.6880179429892	49.154753281914	18.6581948127613
Male	Non-Hispanic White	56	10605917	2016001107579	W	N	32	30	'3332'	FM	NA	0	06	23	385	385	32	23	5.17930855592106	4.46657638997631	-0.197653737364845	-0.0331923133312095	71.4446234637325	171.76310699806	2.54531246377313	3.75068130959611	0.136704721119251	0.91199410813433	0.973540611916712	0.502693693186168	6.06778246523638	6.91878559655012	2.54531246377313	0.27469191877658	24.0119840272996	2.54531246377313	1.87588147518669	6.91887661782388	0.372859206938732	27.0690974018271	34.988406139275	78.0783592798842	261.354617495626	0.356613770347891	26.5915694767838	129.271292723264	27.0752078014254	46.5480405643993	16.6307291344069
Male	Non-Hispanic White	175	12300700	2015000881952	W	N	68	21	'6568'	FM	NA	0	23	24	826	826	68	24	5.16620527628944	4.4946383871955	-0.162001926404434	0.0221000439608912	76.1447748766821	179.164668775368	2.76646537627137	3.7869858692098	0.141321834261888	0.8983439631598	0.81884170496394	0.960087301985981	6.79639912897149	7.52002513219521	2.76646537627137	0.374000169983838	24.0373365969728	2.76646537627215	1.95948044498834	7.5200325609164	0.365420149811331	26.5242103262141	39.4825071032382	85.4640339212623	269.756575768227	0.370502081161918	29.2239678289342	145.630055812122	28.7074592265705	49.503530047758	18.6568056721081
Male	Other	145	12101703	2017000040938	N	N	57	39	'57'	M	NA	1	21	25	695	695	57	25	5.12805490548648	4.34824475190629	-0.220762893853254	-0.0160004701665372	62.0215470697882	166.011063764604	2.33901430621659	3.05984127543277	0.132312868897928	0.591277674676164	0.806482105880038	0.779265185380382	5.20732534848907	6.35809731469364	2.33901430332084	0.336302790316068	20.6234895461108	2.34400059256365	1.14415163730652	6.35810007722281	0.445601311575021	25.5161042331945	29.5537375651047	69.8335128299187	254.762520075163	0.300158044158682	24.2037668628737	113.211658215404	25.6577923071014	37.2324494645755	14.8973294601467
Male	Other Hispanic	95	11208611	2016000410188	O	O	15	37	'3918156577'	FFMFM	35	2	12	26	183	183	15	26	5.13554993203724	4.17284165674208	-0.00133629983128949	0.0145705272663173	64.8129453230999	172.452262545169	2.69519505145467	3.79618105840206	0.151121379729354	0.897023909688801	0.648932222953918	0.917464354425608	4.07508497234662	7.31946899068189	2.69519505145467	0.258585618037143	18.2656537664164	2.69519505145467	1.84248769642157	7.32629973252176	0.323735528920058	23.0475899093531	37.2608283085011	81.9661713304375	262.140687648733	0.343922702009443	27.1590606053537	129.449499351574	27.2700127953279	48.4464602633106	17.6630071033948
Male	Non-Hispanic White	129	11902100	2016001329484	W	N	69	27	'6968'	MF	145	1	19	27	835	835	69	27	5.167179717054	4.48160368633955	0.121309454233065	0.0756087070545825	99.7745499796281	189.196928834187	3.53585251376398	4.67484776600609	0.225639329424425	1.19379349420652	1.03876250084116	1.20325042832495	7.07863142391365	9.48665422170788	3.53585251376398	0.566473696435712	31.2097685842779	3.53585251376398	2.21277324545333	9.61144363627576	0.548061210013377	27.2179614650885	47.3174948658072	112.122867127707	281.007766854535	0.506356432786555	38.3883360843548	192.792763452335	38.0302974611752	65.3259315265601	24.8400504704953
Male	Non-Hispanic White	84	11305002	2018HU0480348	W	N	23	29	'2852234502051006'	FMMFMFFM	5	2	13	28	281	281	23	28	5.17786528016211	4.43647974014794	-0.0203421931147534	-0.0451551881392342	82.7759489049184	169.475791230771	2.87879601776541	4.2946917760235	0.158080801658196	1.47591463308331	1.00163469213618	0.821010099237647	7.4564492154421	7.82527750141085	2.87879601776541	0.348697014359272	26.1213049363071	2.87879601776602	2.36138382791076	7.82537890291144	0.371073045886821	27.7536693791771	36.8771694903709	86.9327803883346	258.739964668915	0.416799458506765	29.6001941390734	125.302859542239	30.0631484783993	53.4063159239854	18.6214894981409
Female	Non-Hispanic White	192	13904111	2015000399171	W	N	16	27	'505416'	FMF	3	3	39	29	197	197	16	29	5.0933274581774	4.13112584747393	0.37874300587723	-0.0447068776462944	90.9098952005933	155.80739243269	3.67700976636652	4.64148162000135	0.347460851324351	1.02954700998147	1.08192678656275	0.912451681061062	7.15366998318033	9.37122898830027	3.67700976636652	0.513048672827156	23.0906804464217	3.67700976636652	1.76149274979818	9.99514881334714	0.592719624260285	23.7238655801632	63.5907247673573	110.831843797126	233.564190708607	0.176086700815141	44.0867163552533	153.381886932905	44.5309837152202	55.9330543735822	21.470445257726
Male	Non-Hispanic White	74	11205707	2015000921251	W	N	52	2	'52'	M	NA	2	12	30	632	632	52	30	5.1758727260863	4.50868546733243	-0.0716064775336339	-0.020626470653756	84.5276745151519	173.338487047648	3.19551463114302	4.42309689077382	0.173928908577483	0.956169294301028	0.333420579595632	1.2056559513352	3.88360470703946	8.68623432947486	3.19551463114302	0.357603013944468	28.3030223419034	3.19551463114302	1.774191287705	8.68630934623865	0.267236569156603	25.4519754318623	39.9966770573697	91.2031283187009	263.150387014115	0.454828920136855	32.7092043143878	166.099784276417	33.5604054687529	51.0005297741015	21.0225227973639
Female	Mexican American	200	13701202	2014001200030	O	M	65	63	'6572'	FM	15	3	37	31	783	783	65	31	5.03322146508209	4.29033057883051	-0.373974833642844	0.0174742296471203	50.2171069823643	156.131046258081	2.15355345253421	2.62345035323212	0.176358690954274	0.51837517162398	0.694100109313279	0.642385954273332	2.59368612125427	5.84268892712711	2.15346513000501	0.279350082223268	11.9421393876106	5.85372513054805	1.43611824826126	5.85372513080903	0.217902883574343	22.3192106434647	44.1731695163106	67.0765788540554	233.927977998973	0.101817123692231	25.3001835848311	87.8559014229161	25.1100296692381	31.8088689994729	12.5938935881808
Male	Non-Hispanic White	188	13604102	2018HU0391065	W	N	86	24	'568186'	FFM	20	2	36	32	1036	1036	86	32	5.05635253626395	4.05786649627997	-0.335574435230398	-0.0592313076837462	41.3590830940947	147.986525926166	1.58236367912468	2.07744178993198	0.0754960198022608	0.487160843849901	0.380204579894732	0.499195283514903	1.98619185605169	4.30128219393083	1.58236367808267	0.141736469575991	13.91846641707	4.30131043214574	0.835564337670802	4.30131037891341	0.230711246107963	25.1375331514616	17.6686825507929	41.8797947688488	233.721891894158	0.189434144879245	15.6615457603883	61.0609936334003	14.818081584396	24.7426212567716	9.24582581265198
Female	Non-Hispanic Black	59	10603900	2018HU1061866	B	N	51	20	'12738351581512'	MFMFMMM	NA	1	06	33	614	614	51	33	5.09393828022171	4.45377616333821	0.0424704172749356	-0.0835118761420713	89.6798925499043	149.968669769907	3.80892317676524	4.78709900836588	0.327509626370103	0.71938110573954	0.984023794307432	1.16583858380538	5.15274521410193	10.3535654111292	3.80892314416084	0.193919222086041	21.8893053822052	3.80892437854326	1.93457068926644	10.3537265687693	0.528074640065964	22.5446841943728	66.9713016002869	104.997536932296	226.968516417266	0.176966849720314	43.3070276961374	150.904498269639	43.5815948446587	58.2875757978412	21.6126408794394
Male	Non-Hispanic White	73	10804101	2015000108135	W	N	67	9	'67'	M	NA	1	08	34	814	814	67	34	5.16733811489409	4.48102158073204	-0.203406040714611	-0.0663001728694934	72.0683907727795	164.192240913358	2.74767851188157	3.5720032738937	0.15388516152809	0.910541853153744	0.488930971523726	0.862324331635618	3.66568369333401	7.46894397662504	2.74767851188157	0.306639361097971	24.4729181424017	2.75164457090314	2.01769061361126	7.46896456929505	0.378208588655992	25.2288293412566	32.7362493078292	83.9059365168957	252.666249884813	0.354422046519581	28.4240829107254	139.069472981947	27.1504400948756	44.8877950351662	17.356140637155
Female	Mexican American	199	13401902	2017001090300	O	M	80	14	'8680'	MF	NA	1	34	35	960	960	80	35	4.97557490406366	4.11892556838351	0.257086740678802	0.00437375210001776	79.5202979392547	145.466912632515	3.57702372614854	4.42278759844091	0.300643532633954	0.707472917114209	0.697581889726589	1.01731961837833	3.60367458462925	9.72151324677914	3.57702372614854	0.405400096741945	18.910627415067	3.57702372614854	1.88224032631673	9.72335859475463	0.45062156943948	21.2308556015299	63.3399270057832	89.3970318954344	221.839246060497	0.158000391416177	44.7297618168179	125.265301394679	41.1719206778539	50.7952796120591	19.8381061637325
Male	Other	264	15500700	2014000297039	P	N	8	91	'29081612135455'	MMMMMMF	NA	4	55	36	98	98	8	36	4.84466183604352	3.30590805936887	0.101049651936473	-0.00134691273592179	30.1733085673165	126.889283568238	1.53848362418531	2.11405540478311	0.06804037123417	0.293028519172844	0.302957648501174	0.410001426340001	2.01276269899312	4.17327775087578	1.53848379744601	0.0642842179069701	4.49540341796687	4.18203207900474	0.870347097163614	4.18203207900426	0.207805667120918	18.6123459373334	15.166217421883	40.0508692446924	208.257893315182	0.171484734336796	12.6852230822198	61.6940058933377	12.433620798582	20.6807292008722	8.01003396181847
Female	Non-Hispanic Black	191	13700800	2018HU0993053	B	N	38	35	'3811401915'	FMMMF	NA	1	37	37	466	466	38	37	5.08846391531766	4.43839410452146	0.150914845949916	-0.00350168226161271	98.4263891449747	161.573836972324	3.85377778589176	5.32207099815498	0.340685168706658	0.863008651568255	1.40945672097851	0.96454572766744	6.3431117833021	10.4667563937894	3.85377778589817	0.564265878341822	25.2802799648405	3.85377778589176	2.6508462553587	10.4756540550507	0.502865098117392	24.5402347030238	85.1528163700111	112.163722605213	240.017823555173	0.200685719468846	46.2625243954656	157.956410887337	46.2142680167234	55.3488379862174	23.1243839158753
Male	Non-Hispanic White	225	14703000	2014000621635	W	N	70	32	'7069'	MF	NA	2	47	38	844	844	70	38	5.16456785379828	4.47502135086261	-0.0518815935595037	-0.00367556412924375	83.3575975409062	174.31993010339	3.01928350646907	4.34151981822996	0.186454985769348	1.20290741119113	1.04136914396029	1.229849122255	5.89441847959519	8.1554524781697	3.01928350646907	0.421062360994403	26.2475160488983	3.01928350646907	2.11459968560061	8.20726349060008	0.409080178241135	26.6084035706834	40.5688447607328	80.6576300217927	264.267066720765	0.439451701511117	36.1496967196016	153.339604529477	32.1228104871648	47.2403857285236	19.9474298963241
Female	Other	259	14801800	2015001407137	A	N	72	12	'7172'	MF	NA	1	48	39	869	869	72	39	5.02846720064738	4.03423621911141	0.280627917283851	0.00790519393718398	74.8034596858364	153.910673910678	3.35668183543011	3.82775920223445	0.316373008558411	0.72622217575797	0.57940772240657	0.718868860109424	4.62774389255886	9.12440718666595	3.35668183543019	0.280514828468017	18.0833618447977	3.35668183543011	1.75351247530384	9.12440723559353	0.412857436986672	21.2849419019338	62.4057470598204	92.3528254257414	231.428462049203	0.147889339262472	38.079947045147	141.694602067131	38.7947079677176	51.6969594739518	19.4207928690521
Female	Mexican American	225	14800501	2014001383198	O	M	74	23	'7475'	FM	141	2	48	40	895	895	74	40	5.03121323042544	4.26793267237744	0.153465877361062	0.0415093136424313	83.2125809501315	159.608276919341	3.66011562164223	4.23101863037119	0.324733874447123	0.904524685714111	0.999766679680869	1.0492369295853	4.15957576246904	9.94076721766328	3.66011562304242	0.365465377749117	19.6511554317951	3.66011562164223	2.17366228670087	9.94922578436914	0.508305431338242	21.7349596439239	73.2965548314393	118.342480909006	237.824597972414	0.174636756842473	44.4390260976925	147.98495411716	43.5831092194583	55.6901532096005	21.7616381562404
Female	Non-Hispanic White	175	12201400	2014001268150	W	N	70	13	'7071'	FM	NA	1	22	41	849	849	70	41	5.0847604152275	4.34493577478514	0.338031329196566	0.0252186800401198	108.09031244039	165.666891615498	4.4566558406138	5.22630787904265	0.422875453197695	1.43367676153425	1.34474590291218	1.00684420633245	5.92710056962727	12.114139912257	4.45665584061383	0.389331505891674	23.8789456320602	4.4566558406138	3.30117975343522	12.1144465687641	0.463192787072055	23.2536817528865	92.5786112889413	140.952965534465	244.5637062062	0.232194157371423	53.6531991994532	174.552144673355	49.4650008069067	75.6087002073285	27.2484067416505
Male	Non-Hispanic Black	193	13600703	2016001215735	B	N	64	12	'64'	M	5	0	36	42	773	773	64	42	5.16755891772919	4.4807989682492	-0.128756189441022	0.0356427732243183	77.6368960542399	181.853549659449	2.8005736500228	3.86674987900259	0.167640677062945	0.661815429143902	1.08318657819578	0.942426342828569	6.39608058567576	7.6003494957838	2.8005736500228	0.500108162059814	25.1200572377981	2.8005736500228	1.73653574686555	7.61274824774717	0.527794340108696	26.7217833759194	37.0301137965289	86.6348948528032	272.787269585245	0.398994309035456	33.0443131993499	145.000116976362	32.0702194888152	51.4631192695593	19.0990209815526
Female	Other	188	13703300	2014001477538	O	N	53	12	'5324'	FM	45	1	37	43	646	646	53	43	5.04766375451093	4.06180062170424	0.0743312321013821	-0.0071834141631394	62.5603601945264	154.544231029676	2.77684581287623	3.5772771979731	0.244210265425282	0.661627375537217	0.857770828412845	0.806296300445313	4.30225001199003	7.54824944288108	2.77684581287623	0.249285783007194	15.7172253771123	2.77684581409849	1.42119505613347	7.54824951352628	0.354477499205578	21.5292884122049	59.9023449203006	79.2793351931736	232.142583251126	0.129292360350346	34.0048593146262	105.407887476073	35.5820432896104	43.1804939843699	16.1156040072791
Female	Non-Hispanic White	261	15310200	2015001459903	W	N	73	66	'7073'	MF	NA	3	53	44	883	883	73	44	5.07448565691071	4.32312068013807	-0.270657838354122	-0.0263788560103623	57.5389921186551	155.727362328816	2.69762817989775	3.42039842250671	0.22574554267104	0.797148611406937	0.68750592917707	0.505550906515064	2.59024670447292	7.33291285896845	2.6976280312009	0.352838416202908	14.2903115447186	2.69762803120089	1.56517232060389	7.33291323188749	0.352451848786026	20.3294759148246	56.7738735143739	79.3899784930587	233.474207653773	0.127955514240416	34.3649336350436	111.96634303178	32.2761777482475	43.4172654633893	15.7456641782309
Male	Non-Hispanic White	147	13200405	2015001205950	W	N	42	20	'42'	M	NA	2	32	45	504	504	42	45	5.185038925471	4.54074427434471	0.464926663667088	0.0463951195728144	149.25719189483	187.060864974438	4.70413248191072	6.27399175886351	0.278500111845097	1.7323457540525	1.29673949926143	1.29236354808472	12.0664412884887	12.7871518383958	4.70413248191072	0.832517160877188	43.8140143662768	4.70413248191072	3.03611890242964	12.7871578386514	1.24341648605199	30.7289516119676	65.3455592460152	160.081864579916	278.624925606825	0.654962397348222	49.9662820159907	259.931445101713	55.594839821517	85.7626184160294	32.7672140704255
Female	Non-Hispanic White	156	13400904	2015000936120	W	N	9	14	'02383709'	MFMF	NA	2	34	46	113	113	9	46	4.92765285383044	3.5528472814955	0.425375070654894	-0.0155010755279783	53.4219842943643	135.931594598108	2.87729215329581	3.66003852117186	0.246746516156833	0.665881736686167	0.574121279443798	0.745614325782275	3.78446299240795	7.63078484060508	2.87729215774311	0.249539805808634	7.58534476657422	2.87729215329581	1.37512993755465	7.82129097547179	0.349459136557975	17.5667570229779	50.1695857961719	69.5140742582768	210.841221261666	0.120011594624069	30.8930962394509	115.074187163408	30.8407514952794	40.5470569387524	15.1662947881874
Male	Non-Hispanic Black	58	10603742	2017001284897	B	N	9	78	'09274853212705'	MMFMFFM	15	1	06	47	116	116	9	47	4.93757763980882	3.60075208581535	0.340100123807641	0.00917266858107898	51.4624394043298	140.716933457628	2.47129933266242	3.71863233497339	0.122488451330215	0.546405118149403	0.680481686352887	0.590332413434607	2.88165012971263	6.71708076346669	2.47129933266242	0.138912674423972	7.50228247071023	6.71768806865921	1.48517438717691	6.71768806861315	0.252307507927097	19.8240413146792	29.3633449299468	66.5685735118096	225.057004222113	0.294816266644357	20.9593133868844	99.4517195438687	22.4960298969025	37.9181544742314	13.9045806086278
Male	Non-Hispanic White	156	12901803	2018HU0915333	W	N	8	10	'3837080900'	FMMMF	NA	4	29	48	106	106	8	48	4.89739269602427	3.44689138021811	0.0109207328355403	-0.0157285667795364	31.7474406631081	131.849896688371	1.63298396552346	2.29473938682067	0.074649198718294	0.435416407093389	0.203299137696288	0.286468430322945	1.63538435080584	4.43879709242461	1.63298186842598	0.088802587083633	4.76332490183676	4.43890493914544	1.04486269551741	4.43890493914544	0.268314938904832	18.4413900640342	18.3546537998729	41.7271131000488	214.334759144729	0.181197778307819	13.8582059618173	64.0805321431431	14.0388080602969	22.0178056148323	8.75011938641979
Male	Non-Hispanic White	197	13703900	2017000665001	W	N	16	24	'16023211'	MFFM	25	1	37	49	193	193	16	49	5.16987564791092	4.27743514621265	-0.340156936620356	0.0191046554973802	51.2788409302274	179.285642732393	2.17131621881928	2.81715668913001	0.132340345973641	0.684418854231626	0.751927446025541	0.580801193150298	2.89250712212904	5.29873771160238	2.17131621881928	0.18214638642317	16.5731368790229	2.17131621881928	1.19434363858833	5.90224942145427	0.350709154498338	22.6164776395912	29.3478940315491	72.0636439171831	269.893171199211	0.261142047458195	26.430880686984	112.300948159667	24.3809296489926	37.8968924075024	14.6505854993354
Male	Non-Hispanic White	153	13401202	2015001262240	W	N	50	12	'5078474519'	MFFMF	NA	2	34	50	601	601	50	50	5.17729660495425	4.53301796510722	0.347584129004382	0.0672373029500942	131.709941797449	189.527457389874	4.34162553261067	6.35142529701207	0.25155366579079	1.51477262933073	1.39674317132669	1.31866394694907	10.8956237204933	11.8017589434996	4.34162553261067	0.639815846500566	38.205446036451	4.34162553261067	2.56787399450555	11.8017617519964	0.721744091446214	29.3365504021831	57.3773568007685	140.934003529613	281.375878629535	0.607282563729424	46.7015096224155	239.145053975366	51.6572172586697	85.1343336807812	30.5407174729688
Male	Non-Hispanic Black	39	10607314	2014001310624	B	N	59	30	'59'	M	60	1	06	51	710	710	59	51	5.17207961719276	4.500793717587	-0.22954709399092	-0.036228947815739	71.6108517757413	170.008879727452	2.66333111539044	4.13751146170526	0.142470017649574	0.592398422618434	0.885611310955226	0.824642444773624	5.36685872726135	7.21242881483998	2.66333111539044	0.370568543890409	23.4138578789298	2.66333111539044	1.42990678127898	7.23968456966394	0.37758808311735	25.8877014059302	32.8111910529402	83.8401789681521	259.350127641057	0.323466099076229	28.1971174761561	136.013976538985	27.1827580887588	44.4552408852569	17.2683816181727
Male	Non-Hispanic White	84	11303003	2017000428662	W	N	15	22	'52152055'	MMMF	5	2	13	52	185	185	15	52	5.16117564173694	4.21284184726705	0.221489242581796	0.0438319097032906	84.2957197627648	182.182248501947	3.42074015879121	4.92995218621914	0.187447509889628	0.720282524348842	1.29365924734606	0.805604191097465	4.04802195792596	8.48606175968522	3.42074015879121	0.487673329485076	23.6377360873134	3.42074015879121	2.68349239142362	9.29853580822871	0.481665705721895	23.6425381203325	49.8776363337625	111.680041652417	273.156981710491	0.480260985264196	36.4562044243587	182.380302075268	36.9599777147728	64.2487518666524	23.3599764247818
Male	Other	273	15311605	2016000205056	A	N	19	43	'251924'	MMM	45	1	53	53	230	230	19	53	5.17640631580314	4.41584192570864	0.0365967505461257	0.0206968398847042	85.8360152222019	180.747884270185	3.05748158914596	4.35034373312351	0.166071523976587	1.21129406032602	1.19032501099241	1.0281528395325	5.82210528805095	8.31106753215028	3.05748158914596	0.628876601459124	26.9109807645053	3.05748158914596	2.51216961672429	8.31109664201667	0.828829550066266	27.0740906263898	43.4603120078029	105.501556109163	271.542416585275	0.402165544117822	31.1824156411154	151.329277439419	33.1111544509447	51.1521828902366	20.755898484542
Female	Non-Hispanic White	120	12100100	2017001152698	W	N	29	26	'020429375109'	MMFMFF	NA	2	21	54	353	353	29	54	5.10517806350936	4.30326810362535	0.132363130978097	0.00411510068616572	84.4053876772836	165.553294511267	3.47070688106606	4.5332199898896	0.327283330696454	0.790424662017095	0.941292600215862	0.687104188769248	4.11037231955787	9.43435931437482	3.47070687892943	0.261742019651772	23.1894803766091	3.47070687892943	2.48065635986084	9.43435944080445	0.563786654360243	23.3193650808446	71.4134269201487	100.5875712709	244.437923179511	0.182028096300089	41.4818254787415	148.947971745612	40.4782951941457	54.9357185291606	21.2093095362588
Male	Mexican American	188	13604017	2016000473392	W	M	61	64	'6361'	FM	40	1	36	55	738	738	61	55	5.12327543256431	4.40307839750577	-0.0418839822576095	-0.00973569317408148	78.3506617818488	166.257823884866	2.91774121619599	3.67105309982075	0.15934882849355	0.875608235771651	1.02894561144679	0.934377364785789	5.30623389215932	7.9312352514143	2.91774121619599	0.335559442008203	25.5335143343697	2.91774121619599	1.86192329622409	7.93124292813097	0.366127738174388	25.8531908679682	35.7414874639389	96.3762540202886	255.046478063299	0.351807574522681	33.3270261338282	140.533929920347	30.6043169606463	49.4057975403392	18.6039905272728
Female	Non-Hispanic White	84	11301006	2014000779544	W	N	32	70	'0004063232'	FFFMF	NA	2	13	56	387	387	32	56	5.10960464695604	4.31152413776881	-0.0826520129073937	-0.0236937523902648	68.6397714073335	161.727188580321	2.90811453591839	4.0645433882495	0.280398886480377	0.872774512221682	1.26219588522503	0.8978539657841	2.8569564178893	7.90499458234385	2.90811453591839	0.223136070818198	19.2862174440611	2.90811453591839	1.61984483590025	7.90507489803032	0.451543478982449	22.6028432028923	56.9528455512762	84.2828377267872	240.188656074446	0.144970265020133	36.8479136997061	123.221520754668	34.3433294894977	48.7017676223276	17.46240305232
Male	Other Hispanic	187	13603105	2016000258152	W	O	19	27	'6419222566'	FMFFM	NA	4	36	57	234	234	19	57	5.15928616310307	4.33308123614623	0.275855700902104	0.0698824432373658	100.377385418278	186.637569706814	3.49920512935398	4.97713130603687	0.212173897030434	0.775765335069035	1.07691063833246	1.15153407001162	8.30891787132545	9.46372089632916	3.49920512935398	0.433934509791241	30.7837276685486	3.49920512935398	2.25941343468377	9.51182571679687	0.917179646347995	27.6857676837052	51.0406727199487	106.343595189045	278.151921788402	0.473111293842585	39.7007173821755	176.001530687714	37.9134886655624	64.2249744629941	24.3327657865411
Male	Non-Hispanic Black	190	13600800	2017001100732	B	N	55	20	'1320535516'	FMFMF	NA	2	36	58	661	661	55	58	5.16471624487234	4.49363335953753	0.129934381190513	-0.00333722213916076	101.856783237798	174.404798029446	3.56444151528097	4.6577523283934	0.181471816762627	1.11417829798257	0.900694719683357	1.03042670303238	7.49716528093871	9.67123729905089	3.56444151528097	0.920651966518893	31.505226186362	3.56444151528097	2.42418666614689	9.68915656828393	0.942929644586624	27.5758043163654	46.2327248369017	122.8577930974	264.363554970552	0.500188465491999	38.6615155404401	167.933776167705	37.7287541414855	56.09758268965	23.5577107616075
Female	Non-Hispanic Black	125	11703602	2015000342265	B	N	8	184	'030827'	MFF	5	2	17	59	107	107	8	59	4.91212855441134	3.56645813511756	0.11337972568557	0.0174683197947725	39.6399663591852	138.323739231735	2.0097791661895	2.74606974353592	0.163027037570193	0.441961649402645	0.306000050598462	0.582025822987388	2.60128145232291	5.45869305966286	2.00977937465965	0.197860271602528	5.03253532630883	5.46314618666848	1.14440477891534	5.46314618666844	0.266100894641856	18.7235432758151	34.6069585597643	46.1222354171673	213.617955794278	0.0869065202763343	20.6506837936754	75.3453695736325	22.0243980671701	30.653903942439	10.7331229269832
Male	Non-Hispanic White	81	11500302	2016000108533	W	N	28	18	'2428'	FM	NA	4	15	60	346	346	28	60	5.20115293270758	4.48506111533135	-0.146297379205358	-0.0049945047443198	76.6127671723205	180.577207367049	2.77129672397268	3.89067089967976	0.16124424859051	0.992742120683512	0.646036518651031	0.397724294577549	5.05422953093461	7.53307242768524	2.77129672397268	0.597490768878992	25.6913802888498	2.77129672397268	2.7221534681123	7.53316536427875	0.32878494358845	26.6450971523884	36.9277966563068	101.023434063851	271.350084494356	0.394949137204735	30.2892246932766	148.74272868346	28.1164058025251	47.0562739493751	18.799790005223
Male	Non-Hispanic White	264	15311706	2015000844143	W	N	52	59	'46050952'	FFMM	NA	3	53	61	629	629	52	61	5.17164898914075	4.50025216368483	0.171876857859117	0.0347086006692024	106.925146212657	182.428367625455	3.69847245755914	5.08359482435824	0.209615113656734	0.961194676066	1.1857379784356	0.801784231580334	7.81563100949166	10.0502101415879	3.69847245755914	0.526346896831488	33.2876721720819	3.69847245755914	2.82051835103679	10.05349011877	0.748854578988252	27.9106238966625	55.3925942027765	117.331586452177	273.433701084713	0.56231761252594	38.5339637409246	181.911873448267	41.656128476158	66.9741217950895	25.2821753107568
Male	Non-Hispanic Black	148	12101703	2014000478002	B	N	3	11	'034201'	MFF	NA	2	21	62	39	39	3	62	4.59453806414421	2.77846734767147	0.00370095688414656	0.0241322240804422	16.1540098141317	101.359164007632	0.941661758376799	1.52828274835389	0.0345218073356975	0.228687034432375	0.106285149375695	0.200774727779774	0.669345143492588	2.54081110058737	0.93483118968365	0.0433087516678501	2.60312171282686	2.54081110189012	0.415166776486857	2.54081110189012	0.115920281578008	17.2823360626209	8.09680195771407	18.9583426195732	175.966512507455	0.0788246928545807	6.66552850122764	29.5745363320753	6.4602432537778	10.6323314420198	4.11195101128719
Female	Mexican American	190	13402102	2014000698376	W	M	43	48	'46124315'	MMFM	10	1	34	63	518	518	43	63	5.04522398338272	4.22855197562494	0.146658853483297	0.032782963295178	79.4565895484239	160.453943768598	3.32979852684179	4.5208832430182	0.307129257308441	1.15328157346174	0.537449442873418	0.907978259191996	3.56505010217101	9.05132907810156	3.32979852684179	0.326577165753544	21.9292467380954	3.32979852684179	1.91071268668355	9.05133078565901	0.441428671906815	22.8622814287164	71.1422466898077	95.6420931896835	238.769038983304	0.151862579643717	41.3068612171468	140.881373361878	37.0647140748214	48.2986926455857	19.8763198565508
Male	Non-Hispanic White	117	11900400	2014000913943	W	N	66	13	'6662'	MF	45	2	19	64	794	794	66	64	5.1641207726878	4.47965298153077	-0.181368359671617	-0.00375807610020273	73.573479054163	174.227635915788	2.76025098651996	3.47394065467255	0.150955921730154	1.19335638172949	1.06529472922686	0.967223044438834	4.82094176356145	7.50287527597343	2.76025098651996	0.194138511921056	24.1548307779983	2.76025135571368	1.50918016341064	7.50314009864334	0.451777812958272	25.6546337320296	37.0037163762237	91.5348553712228	264.162122056241	0.362951476025729	29.5779120412092	131.920725837632	27.9134338045367	49.867845733866	18.2288439501736
Male	Non-Hispanic White	285	15159306	2016001314794	W	N	34	27	'355734'	FFM	1	5	51	65	414	414	34	65	5.19043668323978	4.51095005493283	0.0485041968602554	-0.0287270403946291	95.5313295490936	174.462469296415	3.30204419876424	4.7833379567021	0.187736905405216	1.20740076390035	1.12084332145255	0.902709527601875	8.22838847040428	8.97245482175378	3.30204419876424	0.521002222328548	30.7138946765758	3.30204419876424	1.47823995604026	8.9758866761248	0.405169846469585	27.9309663343832	42.7406274301473	110.8901407571	264.429116029753	0.417088533877006	37.6552885730989	159.171204820086	34.2951578953374	58.9243722944072	21.82891571426
Female	Mexican American	238	14202701	2014000047474	O	M	16	20	'1647012050'	FFFFM	NA	2	42	66	196	196	16	66	5.06634678959206	4.12642094387354	-0.0879502752368816	0.00348155143770033	56.7395029175602	159.147005987222	2.3467820075424	3.38071322412625	0.202758073778839	0.596291054599697	0.7252535976842	0.579565201077229	2.03680698556247	6.3774846628155	2.3467820075424	0.136387169192637	14.954436267901	6.37821331086927	1.32193022494702	6.37921488503439	0.37180574284444	23.1775770971497	49.1109186479583	70.8187366018439	237.308923344552	0.107002532428729	30.4772633375791	100.844089781814	28.1470529210345	34.8068680012047	13.9228077883563
Male	Non-Hispanic White	227	14501204	2014000802659	W	N	57	70	'592814085757126405'	FMFFMMFMF	NA	3	45	67	690	690	57	67	5.17903152524274	4.49560113681895	-0.229538874238383	0.0057024633872377	71.2405559704644	178.525953539349	2.57960939084301	3.49539382041405	0.1398067165818	1.06145223442021	1.06417205360949	0.865195137918568	6.98082505696288	6.99463462367009	2.57960939084301	0.298898206940302	22.4780608802905	2.57960939347597	1.43814028594528	7.01210533158669	0.456112118172423	26.6167997462513	36.1990103796216	86.2807717280831	269.034999927981	0.337307322739465	26.9654415336248	141.928568760079	25.5376784275905	45.1916298418484	17.3501303069917
Male	Other Hispanic	153	13300600	2017000905292	W	O	81	113	'7681'	MM	5	3	33	68	974	974	81	68	5.16862904260106	4.34177428337327	0.189024357839085	0.028050493407552	92.8326714816613	180.671332125069	3.2946858668887	4.34925770065189	0.188043751271435	1.09774820615205	1.06354490240599	1.3018519712666	7.34852980757654	8.95588374014022	3.2946858668887	0.554183307908436	28.5716164046709	3.2946858668887	2.31689239843905	8.95588472244323	0.575330037521025	27.1764863881626	44.5075015997174	110.361494872406	271.456157255372	0.465207574884683	37.0421451455726	167.959533665564	35.0865213734888	55.3585240974997	22.3590691197298
Male	Non-Hispanic White	79	11203107	2018HU0758994	W	N	64	99	'643932'	MFM	20	3	12	69	769	769	64	69	5.17674189375075	4.46372151910371	-0.174118657028817	-0.0790237425017264	72.9374965010512	163.648060808385	2.68464265744335	3.88558548586175	0.140545531980908	0.86917759975006	1.07387635894685	0.893939071038694	5.08503719933196	7.29754081695717	2.68464265744335	0.316968652247631	23.9503203118344	2.68464265744335	1.8557873518478	7.29761535137326	0.329409761716493	26.1684189695888	32.7640807159361	75.9510697049611	252.037933100259	0.308200612521018	27.9205831346077	130.498913463209	24.7799829271118	45.8591981501568	16.9157946623702
Male	Other	127	11702501	2017000076824	A	N	75	78	'7570'	MF	20	2	17	70	909	909	75	70	5.10453486169567	4.24592776271844	0.40165930195488	0.0811628960958558	104.332932986367	178.698094286553	3.6089777819553	4.97382804543481	0.208456085017519	1.27423420583932	0.807552118048572	0.831371123896285	9.29911930538911	9.81004137566273	3.6089777819553	0.420117588853425	32.349725560592	3.6089777819553	2.18047130169885	9.81021860729252	0.234730398341624	27.9092755040019	45.2883749020648	115.0921206024	269.229535954675	0.491507676983897	38.5127580769955	183.222425570554	39.1788323984388	61.841951188673	24.2910853376639
Female	Non-Hispanic White	261	15401200	2017000309376	W	N	54	26	'5459'	FM	15	3	54	71	648	648	54	71	5.09614395020335	4.33466715315585	-0.0182183606666949	-0.0248265574541364	74.9220914144929	159.38416063408	3.24438278555142	3.83191986052144	0.303573235305779	0.837256540879961	0.740900041692332	0.792628394085684	5.3314844078038	8.81914670762165	3.24438276997215	0.329192661234248	18.5059923902484	3.2449096082447	1.82980046273476	8.81914665971431	0.378422822563589	22.0928644141259	69.3601188932825	97.6486133258326	237.574095332802	0.148505780158292	37.6393549339958	129.942831134611	39.3119435233923	47.9757323017134	19.2695325372366
Male	Non-Hispanic White	235	14400103	2014000001476	W	N	86	28	'8286'	FM	10	1	44	72	1040	1040	86	72	5.05179251934249	4.04113422668528	0.465897437655727	0.0927197662363893	90.6523321952544	171.487827185874	3.26964161250058	4.34857376609457	0.176299317218535	1.21049026083468	1.43818820052404	0.782460993356002	5.27824789036097	8.88452682839207	3.26964161250058	0.601664356988913	28.7127574588513	3.26964161250058	2.60064482546861	8.88780733599712	0.72127454322123	26.7254644205255	41.3467541573824	102.155802380488	261.040405348748	0.363137984083218	28.8572870153429	157.821432674563	33.7550258120797	53.5398077719783	21.3377142968071
Female	Non-Hispanic White	191	13604012	2015000369484	W	N	15	16	'15444618'	FFMF	NA	5	36	73	187	187	15	73	5.0974399605679	4.12198790212124	-0.026877444074815	-0.0138367696055746	60.0459713518456	161.354400472129	2.67063931367285	3.14860416236201	0.254990859811499	0.742910583572705	0.671652936970071	0.743492113923461	2.79862585340201	7.24571055304119	2.67063911721346	0.346844558215575	16.3784738224208	2.67063911721346	1.85607773514871	7.2595497676947	0.379509103573663	21.4837459186539	51.2003542210924	72.1689890184479	239.77330245018	0.125393345580888	32.7510384253316	112.954442712673	28.1193997305402	37.2161258279201	16.0086990196726
Male	Mexican American	226	14400104	2017000327896	O	M	13	8	'13488070'	MFMF	NA	2	44	74	164	164	13	74	5.09889809290976	4.12510526862724	-0.290285512235458	-0.0269859203966912	46.2850843254505	159.478987305201	2.00891533399105	2.99676353897084	0.107949369844736	0.647039889748071	0.300864924960595	0.50230626006451	3.63711942173595	5.35497608792429	2.00891533399105	0.145891750112327	9.68086904044905	5.4607980473006	1.33625398629893	5.4607980473006	0.256515623849216	22.0398382362355	25.4811908194468	58.5407057800416	247.206772068364	0.245908908665784	19.7961463215157	90.6967439639064	19.8411456883478	32.4804001944851	12.4154368768641
Female	Non-Hispanic White	202	13402500	2014000817552	W	N	23	85	'0449022323270942'	MMFFMMFF	15	1	34	75	279	279	23	75	5.09402193719202	4.2662182626698	-0.298103782090467	-0.0371481969890313	52.8847216034797	157.098616731386	2.16028976638808	2.68643838221295	0.19731937374886	0.262543456151783	0.661521306821264	0.672330417080674	2.73402610811545	5.87227594170121	2.16028976638808	0.270294015450023	14.3326041651501	5.87185406060294	1.30537423271078	5.8722764158361	0.295417253454208	23.4803833385282	47.4388445164144	62.3704375081457	235.014406320795	0.0994081433429339	24.9132877878482	88.7048329446458	24.0550295616753	32.6846664554702	12.6924804232146
Female	Non-Hispanic White	43	10603721	2015001036344	W	N	69	27	'6974'	FM	NA	2	06	76	829	829	69	76	5.07518301861396	4.26058889398595	0.0374176551243897	-0.0134729219369783	73.5530231188532	157.860241904333	3.3008029922607	4.26502622464684	0.273504930007961	0.843529811675802	0.763896088450268	0.869081554294481	3.31022984136936	8.97251242150085	3.3008029922607	0.587088603038227	17.8378224871757	3.3008029922607	1.83771429642529	8.97251277790286	0.406042289697743	21.2833726494162	64.2179490046328	96.5388135358487	235.86841432624	0.153129952887223	37.6737223464832	127.537671525008	39.265206953501	48.9249244733571	19.463879194696
Male	Non-Hispanic White	153	13400905	2014000763092	W	N	49	30	'4949'	MF	5	3	34	77	588	588	49	77	5.18228272400676	4.47178062228394	0.0945395505957675	-0.00898704915788422	96.189496996409	176.495551986979	3.37994443178332	4.39986867658843	0.199810880049378	1.05238973983804	1.31919606281565	0.981523323224362	6.72872281217919	9.18763382921429	3.37994443178332	0.433078323519052	31.3494584032342	3.37994443178332	2.34637772444532	9.18764148833362	0.203605731688767	27.4588989368851	46.7141386269998	112.254839962541	266.736891394002	0.463301128084359	34.5242769858201	167.189632449487	34.4518018233742	58.0127444478716	22.5388967704588
Male	Non-Hispanic Black	56	10605905	2015000762689	B	N	20	47	'505020'	FMM	25	0	06	78	247	247	20	78	5.17326458739899	4.39891033028478	-0.213497844462033	0.00185609797381697	65.7206041439766	176.817952329308	2.4314285540652	3.71873436935468	0.135154769642083	0.737594215557501	0.661357871469454	0.82886735098425	4.3926729555812	6.60930521533396	2.43142855403195	0.328652522382595	22.4806384208203	2.43142855403195	1.56886761441635	6.60930805478598	0.413373752799679	26.0296258695284	33.3474042566401	83.0352970916378	267.102239599018	0.330005019296028	26.2351021619126	112.031850219408	25.8280341224715	40.9316105015041	16.2360003051734
Female	Mexican American	223	14203001	2015001399648	W	M	18	42	'46185321'	FFMM	NA	4	42	79	219	219	18	79	5.069934350644	4.09631507289583	0.0299031234597762	0.044780053740595	61.9432223147598	166.453235879969	2.58863957360849	3.41040070180607	0.2515663636925	0.693050114736756	0.501660747590565	0.844428499195994	1.3107137664779	7.03505583346175	2.58863957360849	0.191701600439581	17.0398434637996	6.45923819075587	1.48549396093871	7.0366519133696	0.381110637431151	22.9288709584288	55.9830282491112	78.1555576379847	245.433813938306	0.129634572882794	32.3593681141158	110.570106199466	32.4774276135245	41.2965508514666	15.883492086559
Female	Non-Hispanic White	262	14804631	2016000817493	W	N	39	13	'003923'	MFF	NA	2	48	80	471	471	39	80	5.10474229008464	4.31649280990428	-0.307059607587295	-0.0163710890756759	55.1156223015609	162.125576902145	2.40662504097539	2.9488160593088	0.217588352553939	0.509097093060283	0.403138302627974	0.628907409645918	3.61988406836286	6.54188254053291	2.40662504004069	0.0718142030920463	16.1008379177208	2.40662504004071	1.42238391151168	6.54188511425648	0.248683241555393	21.9016242183816	47.5859681849362	72.0429147971953	240.632268505612	0.11722240130723	27.7492030958145	101.809590266233	30.1090620727789	41.3608112358633	14.477791070685
Male	Non-Hispanic White	154	12501900	2015000972031	W	N	8	20	'43410208'	FMMM	NA	2	25	81	104	104	8	81	4.89092732769193	3.42913892806844	-0.240502797055592	0.00408586706249396	24.2553237898128	133.621769709352	1.30137574078832	1.97761378892606	0.0583257909514381	0.384580567607154	0.14784517247537	0.236596522169468	0.854503725013771	3.52723132484605	1.30137622777893	0.072572451187441	3.8021307830483	3.53750602661117	0.559848155761627	3.53750602661114	0.170163866215813	17.6372926653603	14.3545991032996	34.3244246850356	216.491413681834	0.144010919032415	11.2183690023682	61.9081255996586	12.3500862689859	19.5183933755705	7.04341684323443
Female	Other	189	14101316	2015001444074	A	N	40	30	'4044'	FM	NA	2	41	82	482	482	40	82	5.07269991268322	4.1317708725465	-0.0930670903021638	0.00693004109225984	56.7527312095708	160.714573102586	2.41923016312449	3.16591111625341	0.200181478647206	0.58626604919072	0.629315216334987	0.789777696312179	3.90504392415815	6.57451327305813	2.41923016312449	0.376878941477148	16.0805228555121	2.41923016312468	1.52834864004336	6.57614938987103	0.209899774665331	22.4590044695348	48.3241261920874	69.471688698101	239.059858832112	0.122247544885352	28.9083062025419	89.2223720146654	27.513683720012	38.7112564012748	14.4585205319732
Female	Non-Hispanic Black	191	13702400	2016001215469	B	N	34	28	'0539023415'	FMMFM	25	2	37	83	413	413	34	83	5.0994547930825	4.42811210380403	-0.118457006128867	0.0428699082582677	74.4148186697703	171.113093148672	3.11593181153337	3.98041392305463	0.300129773960287	0.609954991644791	0.660822305655237	0.88143952514267	4.58870551431404	8.46994441411175	3.11593181153337	0.384807352413971	20.6194852844	3.11593181153337	1.59356930167243	8.4699808220013	0.493877680362405	22.8820433728139	62.8346280807502	90.6331800200913	250.569176629577	0.146479380684046	37.9003813546493	139.189218282752	37.5227049083482	48.4299305505982	19.5189117112455
Female	Non-Hispanic White	78	11301100	2017000419262	W	N	35	33	'13070835'	FFMF	NA	2	13	84	430	430	35	84	5.10648781373296	4.28764672503325	-0.13085740252688	-0.0331618913041174	63.8661394902384	159.704610159639	2.76424745837744	3.69851597473885	0.233635235421854	0.709784032724379	0.69317427741312	0.679537346127498	3.11959277857705	7.49138285676772	2.76424745837744	0.206487420368215	18.2488757459193	2.76424745837744	1.58106692852546	7.51400363547147	0.335628177847045	22.104349538853	53.2968048661672	77.6039227388947	237.932245989851	0.128066703724771	32.9821008115909	114.161460565806	35.7061869795106	42.6596333187031	16.442590156087
Female	Mexican American	120	12000300	2014001213821	W	M	3	18	'30033301'	MFFM	10	4	20	85	47	47	3	85	4.61788151162929	2.79920778402061	0.00771693114129819	0.0158042124614817	16.5589164518022	102.892599826813	2.55304715469937	1.19317459038213	0.0594690388550282	0.192570576854178	0.0704709611165083	0.162726753023946	0.391103310124191	2.55603027465662	0.955994464366042	0.0253704763844471	2.13193493642921	2.55611436839634	0.344214549705687	2.55611436839634	0.0787415895949491	17.6094631157467	14.5557458687853	18.3157418712618	171.101304261878	0.0347713073896748	8.36483769499347	28.8112792224966	7.80347832250487	10.1723386643617	4.02234324726981
Male	Non-Hispanic White	56	10607303	2018HU0235521	W	N	72	55	'707232'	FMM	30	1	06	86	867	867	72	86	5.15632274934952	4.46997515697075	-0.270337155436375	-0.00243754799226408	66.662195060268	173.10272447265	2.54972685720177	3.39531214106437	0.153159130560614	0.850660657611809	0.321850641295826	0.783937683383106	5.10560198918431	6.92665174496032	2.54972685720177	0.208511893724937	22.1021486183035	2.54972685720177	1.41387806052137	6.93087617739634	0.282090605510524	25.1448377782031	33.588508710564	84.3126052560626	262.881902640592	0.345967962417288	26.2588347760647	120.558693249008	27.8932263447229	45.4850498481275	16.7569261858754
Male	Other Hispanic	43	10603733	2014000931297	O	O	75	120	'7577'	MF	NA	1	06	87	908	908	75	87	5.11752246337781	4.45751348524051	0.0471735513169275	0.0309611775599578	90.4400351945219	172.17022040346	3.35192894054872	4.44350725462435	0.184446934551	0.689647160277805	0.978826816261368	0.93149914232439	5.16649717982221	9.11118097723581	3.35192894054872	0.369770643594783	29.145549611585	3.35192894054872	2.27806239555218	9.11148752583283	0.373860937085479	25.9814894046401	41.3734840517471	116.774945767957	261.819077576625	0.440968325303141	36.961667892199	165.472108965933	33.6314135634174	62.7181064152037	21.9399735829215
Female	Mexican American	254	14935005	2016000630185	O	M	38	46	'38'	F	NA	2	49	88	462	462	38	88	5.05891874184929	4.32077242596179	-0.0655171585512998	-0.0537499941069665	70.4748048134369	149.182255203225	2.8733693874524	3.81883655721441	0.262635687547879	0.512755584941805	0.683659405103821	0.683189326916079	6.12738224123049	7.81062745674021	2.8733693874524	0.350728155175363	19.052293376032	2.8733693874524	1.87494009101091	7.8106277923621	0.476144692684423	23.5268864912358	51.8454783781707	74.678944693481	226.075286840949	0.135665406579887	29.447846027233	98.3891100969619	33.0018088378047	39.6609940879688	16.2399452117076
Male	Non-Hispanic White	75	11301400	2016001219495	W	N	62	10	'62'	M	50	3	13	89	755	755	62	89	5.18287412803388	4.51856375986037	0.190612113948513	0.0148434754624333	110.960676614206	180.85897853888	3.89097255698675	5.20591627885872	0.22862390245441	1.2862973860209	1.42438897644062	1.16565939863117	6.227294032574	10.5450065682702	3.89097255698675	0.701090501071319	34.7151349496961	3.89097255698675	2.36687211180455	10.5767599966899	0.661729746051335	27.5174657464397	50.5253137731427	134.770996288715	271.667581905477	0.492920361369736	40.9536589056926	187.493614991233	40.762669798475	65.7953661164639	26.426277645429
Male	Non-Hispanic White	269	14805308	2018HU1211821	W	N	12	10	'1237'	MF	16	3	48	90	148	148	12	90	5.04795326213185	3.88468548963262	-0.131693402011768	0.0274058483882008	42.6484993299887	160.029649992713	2.14456652126671	3.08088374423121	0.106603043120616	0.659505167441716	0.60398462500141	0.733730493630221	2.42584927073542	5.81127068362434	2.14456652126669	0.173306980480361	8.7057719968062	2.14461872991193	1.28056688196232	5.82953620468088	0.360432383830122	18.886769147547	27.206058688165	59.2304685198335	247.846678670039	0.265004326360212	21.3375250668496	91.5693473759876	23.2911510334139	36.4302529011368	13.2880922370727
Female	Other Hispanic	55	10600110	2015000392726	W	O	62	42	'6263'	FM	NA	0	06	91	747	747	62	91	5.04650249502938	4.24869669353868	0.13392920103448	0.0203939837887429	80.0479551593091	158.681092225491	3.56164694424651	4.15828834875032	0.330905190362157	0.415897204049341	0.850506019318392	1.10556782087775	3.3427766344849	9.66838444047735	3.56164694424651	0.37234472186382	19.5637797644928	3.56164694424651	2.40417040264967	9.68156015515935	0.507366600179463	21.4749831783913	72.8685058734481	97.9681679255077	236.787678837349	0.180199003222281	42.5484080027897	149.181711481694	43.1239257328719	50.9741766044317	21.0838528191567
Female	Non-Hispanic White	116	11703524	2017000790241	W	N	32	24	'3238'	FM	NA	1	17	92	395	395	32	92	5.11011698747989	4.31194051399951	0.335700053269266	-0.0407772033560866	104.338515218404	159.06927260852	4.17232769949514	5.4734554387661	0.378167446556017	1.2740446814712	1.24161130937807	1.16677466907767	4.0637901582907	11.3415619204933	4.17232769949781	0.459464697957116	27.6271390630786	4.17232769949514	2.2590448700433	11.3415625679137	0.561867170408197	24.0072675813622	80.3107964211647	133.996596189327	237.221985088372	0.200657770071338	50.1637534859861	166.571406009415	49.6466571353071	59.5360061302985	24.7441964828359
Female	Non-Hispanic Black	190	13600300	2017000716927	B	N	8	22	'11414008'	MFMF	NA	2	36	93	103	103	8	93	4.89528128975795	3.51572459468745	0.0904567512807273	-0.0455342269152488	36.8251614271413	127.708083640841	2.00415500058523	2.57870605092047	0.152401081186792	0.38364663198298	0.252230546406866	0.486212079434696	1.89291354943338	5.24735702944048	1.93464245623009	0.108772933268315	4.71725799776352	5.2589034296604	1.03026009465386	5.25890342966021	0.235711188266684	18.03460835052	35.8224633173984	45.4830739954939	201.200476746403	0.0662595587752703	19.0965233109475	69.7632818637006	19.5479061972636	26.3373356923669	9.73127460638239
Male	Non-Hispanic Black	155	12603212	2016000596423	B	N	13	32	'1369012506'	MFFFF	NA	4	26	94	162	162	13	94	5.10727290527862	4.06847483287866	-0.0707930426746347	-0.0130884280017588	54.471726661462	163.070802437429	2.56229312121607	3.29714659312484	0.133501440426049	0.98256095465087	0.823769331717933	0.748200937724629	3.41200817108155	6.96294450075168	2.56229312121607	0.142487294806094	12.3393207531805	2.56229312121607	1.47741357294221	6.96503482858023	0.378256862916174	20.2589754897401	28.3381123470131	76.9086812808902	251.370852544518	0.311798825300268	25.7049773394705	126.318918500661	26.6252235930219	40.4272195571501	16.1021451587259
Male	Other	187	13500100	2018HU0488110	N	N	48	44	'4876'	MF	8	1	35	95	580	580	48	95	5.12944702772834	4.33090435457214	0.237788850883495	0.0232977319612713	96.418028855773	172.905423439421	3.46708129832584	4.66602448345724	0.178826678379205	1.40220783922664	1.02872029829801	0.823856945353056	4.71796315342834	9.41641961819314	3.46708129832584	0.486334419131951	31.3695996276357	3.46708129832584	2.5261462968554	9.42450406585079	0.797510437297434	26.8095667679701	44.4018834434552	117.152005906092	262.657147667688	0.495940232770385	37.8015824756762	162.5316511978	37.1195854712467	61.2937246614512	22.7663421137563
Female	Non-Hispanic White	79	11202102	2018HU0090983	W	N	95	19	'9595'	FM	5	1	12	96	1148	1148	95	96	4.85839889095087	3.27586149190426	0.0745711588447586	-0.00171418143187353	28.5150680408781	128.597157677621	1.42439786877933	1.64824762052192	0.101503194922343	0.292459776985936	0.300859464173817	0.28595695453566	1.50335704740175	3.60016125396904	1.32444768530622	0.154026627055002	6.56801048965381	3.60022207515156	0.866839924970763	3.60022207498768	0.144871778781182	20.5297799138324	22.1156584818584	30.6449468784269	202.250098456603	0.0589617225583683	13.714020484818	45.0112323055136	13.4098537255707	17.0796741200215	6.6967418678016
Male	Mexican American	189	14000702	2017000025239	O	M	48	10	'213944254824'	MMFMMM	30	3	40	97	578	578	48	97	5.11608143710887	4.43133322135773	-0.467818015904571	0.00608853543168207	52.6420487063422	167.69887703616	1.99866435427351	3.26857194750242	0.110402526197112	0.777321103576317	0.556928464108962	0.717663302282035	3.46588954084068	5.43292920530543	1.99866435427351	0.23084791308019	18.3221565628163	1.99866435427351	1.03543906530678	5.43293292428273	0.351260778218084	25.3386138815463	25.8111003813728	57.8870505725057	256.702665188847	0.264775356707465	19.6642899361374	96.635035143648	20.4814785367449	35.203241864382	12.8265616639989
Female	Non-Hispanic White	176	12601100	2015000645011	W	N	50	21	'541950'	MMF	5	2	26	98	607	607	50	98	5.09449712376443	4.3045135945246	0.0275527240387395	0.0274056467129561	76.1013738986447	167.654073536285	3.26211236839203	4.30613154512438	0.314404356504304	0.912620427725529	0.98397461935162	0.968301925652242	4.51452729301231	8.86733657275367	3.26211236839203	0.585097383573673	18.5998763221864	3.26211236839203	1.99728461830062	8.86734077330977	0.468220634401451	22.3288634186923	66.5316378693163	93.0326901778358	246.760588306715	0.166723968931116	42.407522225532	146.982151954901	39.254079178978	55.5736976043684	20.1240191786757
Male	Non-Hispanic White	151	12201501	2018HU0194402	W	N	45	12	'4545'	FM	30	2	22	99	549	549	45	99	5.17858436446167	4.54773202881812	-0.357317718123736	-0.00960708449306761	66.0501505760775	175.735017824208	2.43560989929361	3.3935798141141	0.128697591352323	0.880106236168722	0.81716373421599	0.769232474776276	4.64385762885021	6.62062670450964	2.43560989929361	0.174115074064379	22.8488895646923	2.43561179957601	1.66066867003513	6.62067413044656	0.189094627523782	26.1185260805641	34.3514026166077	74.8682395165049	265.874382473621	0.334687890107665	26.9555737408056	116.999584226362	24.2328574961371	44.5759228412333	16.1891569480332
Male	Non-Hispanic White	74	11208614	2015000776037	W	N	40	22	'40'	M	NA	4	12	100	489	489	40	100	5.19459028822938	4.58191964500364	-0.0129907597336693	0.00908615969109947	96.4407553168908	181.939906396727	3.32814874569726	4.53198388155165	0.184646194324296	1.18468553626379	1.1234928936496	1.35911436900016	8.35571025838953	9.04684201734948	3.32814874569726	0.274136350750547	30.3540014432371	3.32814874569726	2.29742933731503	9.04684625059158	0.283720396104667	27.9772971960981	38.7112540314503	118.354069848413	272.88441762241	0.500497338274198	34.6347584390742	170.072757324697	33.8593044667118	58.059761801925	22.7049983057588
Male	Other Hispanic	8	10400102	2018HU0488910	W	O	72	32	'7172'	FM	NA	2	04	101	874	874	72	101	5.12865371589322	4.41242476628	-0.389143640683261	-0.0629218327697732	55.8841683121598	158.496400475141	2.10986384942893	2.81442297532575	0.111450682589237	0.613439957553221	0.517085607495924	0.633186572775198	5.10125628751492	5.72988596132679	2.10986384942893	0.326929852956192	18.7253691217957	2.10986384942893	1.26818396788031	5.73520456242517	0.326621999607169	25.4870969406471	23.8822217494927	60.511347787781	246.06356657515	0.240142741279403	20.2747436980875	91.7437812751382	19.5069953404502	32.2861835273804	12.9790155944614
Female	Mexican American	175	12300400	2016001188959	W	M	43	71	'18225143'	FMMF	60	1	23	102	524	524	43	102	5.05154312283911	4.25971308363397	0.115673599274378	0.0293922105496815	79.4705635202917	160.924503619575	3.29115265874043	4.01761734721053	0.300346488992247	0.523428762933206	0.850493596219236	0.796149361492784	5.03252108812851	8.94610517128399	3.29115265874043	0.302182514440249	21.8198185388722	3.29115265874043	1.9781659209273	8.94628046692307	0.500005076100397	23.1467266215193	65.8062354618135	95.8182662110787	239.294021339581	0.158667948107772	39.3662013636252	130.460862610152	33.7548302251354	51.2223914272028	19.6888288638113
Female	Non-Hispanic White	186	13904604	2015000013678	W	N	12	27	'121336'	FMF	5	1	39	103	152	152	12	103	5.06233457937884	3.96034353471526	0.514254988201613	0.0214854561636088	87.7593599642573	161.389393093194	4.07670479971078	6.26865331587395	0.378217992238981	0.668590817983126	1.57093641795345	1.22245812444668	5.66527507793316	6.6877306912183	4.07670479971091	0.468025449907981	16.9914223020734	4.07670479971078	2.96154594698431	11.0816325770358	0.672908864430725	20.5270332967163	80.8561322635057	118.804178514453	239.812300777131	0.207204317241393	47.5790580191476	163.393276065916	43.5013517238501	62.7873896338906	24.4410989401953
Female	Non-Hispanic Black	192	14000100	2017001039221	B	N	4	128	'042728'	FFM	NA	3	40	104	54	54	4	104	4.67875942516462	2.92633164793452	-0.130965997181124	-0.0222285902094643	16.3686128546673	105.270248089251	1.10838727259174	1.43650784013858	0.0691438946879527	0.211885352726861	0.11646938508617	0.247536967691595	0.620144810747382	2.69532537607115	0.991610411350681	0.0205145471263752	2.2500169029112	2.6953253786503	0.334758850979616	2.6953253786503	0.112832787483908	16.5080265382297	15.3907639467804	21.7143079706004	174.058184469795	0.0330657113020463	8.63718934020444	29.3123849094736	8.75382101633889	11.1148762444476	4.31470568146704
Male	Non-Hispanic White	47	10607113	2016000736852	W	N	23	18	'8555122352'	MMFMF	90	2	06	105	279	279	23	105	5.17764777061243	4.42924756657524	0.103335655847157	0.00409879457814649	92.9984868343407	177.993416773673	3.25630259827206	5.15338218047229	0.173346555381723	1.0138451672114	0.967088163250021	1.32997682925588	6.13496724202868	8.85152906555241	3.25630259827206	0.54412719380718	30.1416858841088	3.25630259827206	1.95555222818987	8.85154818084682	0.623160678387813	27.5595346340631	45.7542416042553	106.242555527344	268.432883622407	0.382462057790194	36.6332214400246	152.96639859626	34.0975066436308	57.3394208797675	21.8524674100327
Male	Other Hispanic	200	13702000	2017001074814	W	O	63	68	'6357'	MF	NA	2	37	106	756	756	63	106	5.11847942358726	4.36146216487807	0.088633291713711	-0.0659816743570254	85.6351180485665	156.412656575101	3.11809311155528	4.29119283542672	0.161265844531408	1.04025506605171	0.739224542514491	0.79692976687518	6.14058893221362	8.4758542363688	3.11809311155528	0.507908146897419	27.5216660420209	3.11809311155528	2.15145350401108	8.47585584458396	0.310692071210494	26.4639386909945	40.4338732494519	93.4483005900994	243.633318721789	0.378902128927516	32.4627753276833	129.385660339557	30.9606866288619	49.1151425479948	18.9917843212941
Male	Non-Hispanic White	45	10607308	2015000738557	W	N	83	17	'8380'	MF	30	3	06	107	1006	1006	83	107	5.09055266317493	4.18335851824017	-0.0656983753266351	0.0105120509434929	61.4153708201286	164.196636742281	2.2486405714395	2.9761267152673	0.1233662118978	0.664430978156545	0.560828265781027	0.773176448891588	3.12042579410029	6.11218281191447	2.2486405714395	0.293313161456065	19.7017188873757	5.99012425091127	1.52131478602323	6.11243880407922	0.229250546756809	26.3122221488749	28.6434696066096	71.3611824090767	252.67132323916	0.306605361251254	23.2862136193732	106.797447603414	23.1416259542015	39.5698954616903	14.204174716872
Female	Non-Hispanic White	3	10600101	2016001347402	W	N	44	49	'44'	F	NA	6	06	108	531	531	44	108	5.10830975207982	4.29964619724675	-0.0297885614800012	0.0269370517719308	71.5114542211542	169.906248216929	2.9693531562742	3.89954492287367	0.28926430365047	0.971994558177994	0.730037822721528	1.00670012035865	4.98641337945019	8.04464512609902	2.9693531562742	0.381861102503024	19.3778741314694	2.9693531562744	1.48388151709547	8.07153872697766	0.410176056517017	23.083175849276	64.7816665003978	84.1701622455163	249.242573620284	0.142218824941269	35.9974941269785	124.014775964486	35.8247233566886	47.3506467929276	18.5022305664324
Male	Non-Hispanic White	58	10603729	2015000963082	W	N	19	68	'1137194012'	MMMFM	20	1	06	109	228	228	19	109	5.1836132175639	4.3482597018868	0.155814439107152	-0.0138242649806146	90.3846218812114	175.877715029489	3.21989580783101	4.73648296218542	0.161625812474035	0.964737425723432	0.940257278071683	1.12810699582802	5.93661471714619	8.75257043266178	3.21989580783101	0.649476329463186	28.8439637441466	3.21989580783101	2.42316436700008	8.75258426395767	0.53708826210721	27.0706666536817	43.4137168293645	101.934088804342	266.036283964148	0.448870526834818	33.7341496122472	153.222986472667	33.9168103104773	59.1208368866212	21.4152278866775
Female	Non-Hispanic White	48	10608106	2014000399394	W	N	11	19	'515111'	FMF	45	2	06	110	141	141	11	110	5.03059133695386	3.84935399697692	-0.191774606555541	-0.0718063772772178	38.7673884918516	142.420643899746	1.9231133538395	2.39043429941962	0.153624262779253	0.48149974548114	0.34142425270344	0.410024093911414	2.19140643193521	5.1034073330852	1.92311216722043	0.13586802460271	6.67083713996251	5.22756085675459	0.93986706420178	5.22756085675459	0.220496727914329	19.1586725743711	37.3789389012422	50.9171173158606	218.345840566356	0.0935359578009811	20.4701755860067	74.2705007639549	20.6829884429342	27.7124221637719	10.4975885633878
Female	Non-Hispanic White	192	13903200	2015001315233	W	N	62	31	'426217'	FFM	60	2	39	111	749	749	62	111	5.09228344572859	4.36526794908846	-0.0747274811722158	0.0426515886297788	73.0059151936944	169.853284888603	3.21233649752724	3.89652046209872	0.335361629271757	1.09589127363068	0.857485444249455	1.02389883525676	4.14179732983497	8.72627795632732	3.21233649752724	0.34655446630944	18.0330696435898	3.21233649752724	1.4146474666068	8.73203592812406	0.530609170417774	21.7267334072543	62.607852304694	104.477192094164	249.184300760256	0.167035861987184	41.6433800063448	146.228057863817	39.9222912895813	51.9072072446967	20.0115955985743
Male	Non-Hispanic White	117	12001000	2014000678604	W	N	56	94	'5756'	FM	15	2	20	112	682	682	56	112	5.18386355591834	4.50138186581165	0.13696440375234	0.0921095776408514	103.373254653991	195.580710088718	3.65959813545403	4.56598448541407	0.230853325972577	1.08969682254959	1.32190009741948	1.16927877511303	6.55502302906704	9.91051990440142	3.65959813545403	0.518246747703358	32.2961509663962	3.65959813545403	2.62206813078138	9.94781909611237	0.727005941828787	27.2471601601594	54.2069342761725	130.840894182558	288.089397827265	0.522477076083686	44.2227839873729	187.817324873352	44.5947783008188	68.9705018098883	26.3572855783184
Male	Non-Hispanic White	154	12503302	2016000169094	W	N	21	22	'2613622119195822'	FMMMFFFF	NA	2	25	113	257	257	21	113	5.18527516970957	4.35141991279146	-0.239069630000683	-0.0637697405606421	61.0901280526608	167.587470876856	2.26400701765941	3.41692661229852	0.110909235816873	0.827938747641576	0.506753672769478	0.883440662087967	4.74312010726066	6.15243074974493	2.26400701765941	0.382024425492256	20.6278794911735	2.26400701784754	1.62152857507381	6.15420908624349	0.106440121048015	25.9831884690081	28.7138467311516	74.2506060250749	256.574754522493	0.288732456107601	23.0481744733595	120.01539966181	24.0817895069891	34.8264282944075	14.5221761198291
Male	Non-Hispanic Black	191	13604010	2016000502179	B	N	67	48	'53143567'	FMFM	10	3	36	114	808	808	67	114	5.16055644620703	4.47060596605745	-0.383427310169901	-0.0235125826106607	59.5715824532093	170.211854410008	2.11814640618512	2.90709505967681	0.115671857045442	0.622317800549454	0.929427669825232	0.748747241707979	4.03071307637949	5.75771589518267	2.11814640618512	0.194234962060253	18.7919995186004	5.74694554759703	1.46186694303604	5.75771880226192	0.222166196382006	27.1243932332801	27.4466911616021	64.5363575124172	259.582322825609	0.270924473464231	22.5371966810956	107.051761181266	22.9411014382083	34.8126432782319	13.7458341050562
Male	Non-Hispanic White	79	11203107	2017000759667	W	N	73	52	'5473'	MM	10	3	12	115	878	878	73	115	5.15646166837673	4.46004002520854	0.136080662503682	-0.00512405964654481	99.099132519686	172.662290509425	3.56869356447234	4.67931290604713	0.185568726226943	1.50099271890588	1.28663936354228	1.13947972131006	5.47536550865202	9.67185157992207	3.56869356447234	0.658343138486434	31.2096800416116	3.56869356447234	2.28798107647336	9.70071482570474	0.406670140927696	26.7690226771652	44.4831067180412	111.171812594333	262.380095195892	0.460656927839009	36.4365359799037	191.972622527154	34.4983325264039	69.0312156970456	23.4088539292805
Male	Non-Hispanic White	255	15311608	2014000626958	W	N	34	67	'34'	M	NA	2	53	116	409	409	34	116	5.19588456639569	4.52378257611131	0.208899608177034	-0.00932490110226178	113.599849821046	178.852181909695	3.85502637659847	5.15114160861368	0.23114980244889	1.12683215007947	1.65401594253974	1.11894625072262	7.56387910366646	10.4790462106221	3.85502637659847	0.661528088632974	35.7339723193535	3.85502637659847	2.81373821266407	10.4790481475745	0.583716858160021	28.4679825047741	51.1293074808885	140.435504163716	269.403630436196	0.510955471922982	42.0551509198838	192.008280923697	39.9118301797433	64.6631158300251	25.963952532073
Male	Non-Hispanic White	259	14801903	2018HU0010822	W	N	53	34	'398453'	MFM	NA	3	48	117	646	646	53	117	5.17905211387436	4.51274598248131	-0.454592166106525	-0.0337378557671891	57.8673785940356	171.625410874008	2.23977837817248	2.87617986565609	0.126241740709261	0.603551048006244	0.750131844184202	0.677620682548883	3.96477709421419	6.088348430892	2.23977837817248	0.304687530575767	19.8858455805926	2.23985208720321	1.21811148764815	6.08834886516164	0.232672343431321	24.836207348894	30.3010925259176	70.1847653536936	261.197463002881	0.280602766367161	19.7126161353573	121.438857011191	24.152600756322	36.741154666793	14.625610751684
Male	Non-Hispanic White	81	11305002	2015001068769	W	N	24	9	'572624'	MMM	10	3	13	118	295	295	24	118	5.17452058987205	4.43011406366369	0.0407754602244973	-0.0256329359405689	87.4344634762284	172.239793462898	3.11521657708237	4.30404613143556	0.16145910036004	0.584047149991946	0.895436004175859	1.09549174825365	6.6291571059478	8.37872450078144	3.11521657708237	0.375697441191895	28.876837935401	3.11521657708237	1.94600102045517	8.46803660844353	0.456929790076917	27.0668972165387	39.4759439001076	94.0629487055561	261.898423329294	0.391720478742916	30.028494422712	159.220928811222	29.8842981008479	53.2490290863029	20.3967577466788
Female	Mexican American	188	13604108	2018HU0599362	W	M	61	22	'615921'	FMF	NA	2	36	119	733	733	61	119	5.04009193487495	4.27117508183338	0.358931669477301	0.0420781789213138	102.525008205339	161.123332773636	4.22884573461042	4.74844379676674	0.377537887382599	1.29673615796996	1.24566380726102	0.970163994357858	6.57218167396204	11.4951568411112	4.22884573461042	0.44451683912102	23.2094997638304	4.22884573461042	2.84510777035321	11.495194515235	0.531987368463672	23.244206253786	84.506830572938	115.094763317579	239.515730661489	0.205333005537619	51.5638730026556	170.032163724084	49.2535399155162	67.8465448655074	25.3218768994984
Female	Non-Hispanic White	189	14000300	2016000699380	W	N	24	20	'645924'	MFF	20	2	40	120	289	289	24	120	5.09956005391328	4.26904700689908	-0.15739483805903	-0.0533008807300221	61.047495065089	155.439901779683	2.46116440097411	3.41116280155092	0.21745997041207	0.620181165470575	0.528483327019281	0.689146662766018	2.86201711235293	6.6897089076452	2.46116440097411	0.390644271430927	16.1764720350138	6.68753121679527	1.42530825417626	6.69013846044749	0.214095360812446	23.8043141859711	50.5691243774923	70.196537668955	233.150901648469	0.12013440868988	29.1826763081497	96.9337618773922	33.6479617083605	40.9442027312713	14.3455674798057
Male	Mexican American	259	14804628	2014001247994	O	M	36	21	'3643'	MF	NA	6	48	121	438	438	36	121	5.13969635510856	4.42638045863458	0.0481676350492071	0.00713145059462274	87.7549344386269	171.885370783272	3.13283039063135	3.86348117928275	0.161784072318533	0.785664825335005	1.02466391973128	0.730948434829313	6.96288014297773	8.50799740234021	3.13283039063135	0.588435603475346	28.8639142611424	3.13283039063135	1.98369598882136	8.5159159215959	0.312928824003706	27.0113901796458	39.5230311654471	94.6981873472115	261.494132448932	0.395955932326627	32.7588123315615	165.336386885106	33.740552159708	59.8993433083022	20.4804191276948
Female	Non-Hispanic Black	155	12701800	2014001337461	B	N	13	11	'1310430741'	FMFMM	20	4	27	122	163	163	13	122	5.08029429066089	4.11195768659537	-0.0775253381524794	0.03069499085649	56.5108326697471	165.834330589484	2.65934152048854	3.87620324336277	0.293988355869647	0.70992282348413	0.66166528179592	0.80534023442852	4.05809411374701	6.36559265069016	2.65934152048936	0.220419434713216	13.0944478246174	2.72113199123554	1.10889983707468	7.22883972943384	0.325027214979146	20.2499343293414	54.9135496942704	79.9151595513692	244.749067585802	0.12843388312648	35.710305469981	116.026682340511	33.2452539809014	40.4991011215194	16.2717839382944
Female	Non-Hispanic White	274	14804100	2014000020990	W	N	28	21	'3609000728'	MMMMF	15	0	48	123	343	343	28	123	5.10262708236122	4.29357922697914	0.142626853441502	0.0304272048227811	84.453921709795	169.534134018116	3.48315128214347	4.85861678480076	0.375249085996536	0.92788579842128	1.02351558539957	1.07541722214802	3.52341636737706	9.46712629620658	3.48315128214347	0.502638549526168	22.781967731648	3.48315128214347	2.18157039671567	9.46818683587922	0.509933999882878	23.2464121908088	67.0663296463425	105.273567547686	248.833059040157	0.178255535845272	45.069254911864	146.366182445142	46.8724468314747	54.5468732406343	21.6680797158852
Female	Non-Hispanic White	103	11201900	2017001338676	W	N	45	3	'4543'	FM	NA	1	12	124	540	540	45	124	5.09949932898034	4.29989901758944	0.0194501031979996	0.0125307786990105	75.1397054999883	166.007025156234	3.16794137682068	3.93046663847407	0.292220231853792	0.825322595548352	0.977954262085512	0.974768119461696	3.72404291594311	8.61135733211159	3.16794137682388	0.352238907880144	20.6443551301903	3.16898177143533	1.89604526966609	8.61135747823335	0.438976158149727	22.7187802936549	67.1833529605619	84.6270875289876	244.940198100706	0.15930166742715	39.8353402155856	142.818069972237	37.9725120869348	50.5863423175698	19.398904710247
Male	Non-Hispanic White	116	11800200	2014000346120	W	N	68	13	'6768'	FM	30	1	18	125	821	821	68	125	5.16722031840558	4.49138276251172	0.189852641505827	0.0301282260325399	107.90329442649	180.792243209991	3.80755227036005	4.72128937597353	0.218166737797672	1.53355858328048	0.717459900516913	1.11532629184838	7.29527611242785	10.2320072526532	3.80755227036005	0.687102747578142	33.6283615011546	3.80755227036005	2.2941798941149	10.3500001474276	0.570527417649482	27.3392811876713	50.8706338331286	128.31397267357	271.592396274994	0.509004889250846	37.636322826726	198.814384949024	42.7861684314864	68.0902382426397	25.8525561262345
Female	Non-Hispanic White	46	10603739	2016000755524	W	N	33	28	'3200331113'	MFFFM	25	1	06	126	406	406	33	126	5.1077835253629	4.30538665594662	0.290175093477885	0.0153208324750084	99.0437576972371	167.855645630974	3.90870723801915	5.01793423830378	0.367572190521754	1.41616911187472	0.724883229308736	0.900342442241871	5.97029660195201	10.6242763776698	3.90870723801915	0.345786168884046	26.2863186024336	3.90870723801915	2.34930074077263	10.624967841092	0.585827728290695	24.3392622332673	85.2820975434431	113.401044183256	246.98306684242	0.196898606434318	48.981928891699	157.913384610315	49.1041989184453	55.7425281446166	24.1346125258783
Male	Non-Hispanic Black	202	13402600	2016000549931	B	N	56	24	'2349561016'	MFMFM	NA	0	34	127	673	673	56	127	5.1811081304602	4.55217476776366	0.548928304906159	0.0334519213687502	160	183.930883121093	5.05276157769464	7.16324748313777	0.281676075162287	1.6097103126031	0.462332214021525	1.69206187113282	13.2283611536688	13.7339617321635	5.05276157769464	0.85275654389889	44.9054882313314	5.05276157769464	3.39819479695543	13.7348299801616	0.729566230720683	30.6658519385356	79.3760234067346	150.07603538168	275.121007950671	0.654836337981016	54.3120736397968	292.382978980214	57.0280763387286	85.6656587937564	34.7530214547443
Female	Non-Hispanic Black	58	10602905	2015000645291	B	N	12	84	'0611381442081215'	MMFFMMFM	NA	1	06	128	152	152	12	128	5.06945377473926	4.04980368105748	-0.0851799056479354	-0.0178525166752862	52.7004384585634	156.272496845557	2.64904478412664	3.2846943122264	0.239088715671252	0.637373176401091	0.795293070961724	0.651181864473564	2.92458395413606	6.87051144811604	2.64718433393413	0.148875091484084	10.8506550903279	2.64718433393412	1.53246182237691	7.19579307022637	0.422463627458902	18.9081105848719	53.8296042199701	72.1009065725834	234.086909413674	0.131587076153103	30.7712802295334	100.561385425094	33.3964011711476	39.4287237321759	15.4917799844734
Male	Other	228	14801700	2016001502248	A	N	27	35	'040326062701'	FFFMMM	75	3	48	129	327	327	27	129	5.1600417306938	4.29357436646226	0.0951923991423513	0.0325167572020912	80.5410317386103	179.928308941504	2.90372394157029	4.42521602142008	0.165947103470066	1.12985754794353	1.16167613150058	1.11380107573278	4.7208999295697	7.8921865430799	2.90372394157029	0.294169410606182	26.720618218024	2.90372394157029	1.83676633537872	7.89313993533592	0.580018379773442	26.737151795172	39.9738134947057	92.0295148485229	270.618439611873	0.374204187287192	33.5912457638946	147.493880471874	30.4692785714574	50.9467020763007	19.6450310532847
Male	Non-Hispanic White	6	10502000	2016000243698	W	N	36	9	'3612'	MF	10	4	05	130	435	435	36	130	5.18097774618799	4.48688743971847	-0.0760682095431483	0.0189192038917116	82.3368887458374	181.253562747532	3.02600749416599	4.03949825246425	0.170327851439102	1.19864713227387	1.09651826501586	0.634667711383325	4.50763680108623	8.22542158857664	3.02600749416599	0.308018307734673	27.4192064073451	3.02600749416599	2.08020130067896	8.22554118417227	0.617027974616073	26.2097438306347	42.5820435952489	107.758999137041	272.111988362254	0.418057934375057	33.9396713789916	139.593827745421	33.4345801915871	53.9363904089331	20.5853229009147
Female	Non-Hispanic White	218	14600300	2016000257787	W	N	75	18	'75'	F	NA	5	46	131	902	902	75	131	5.08033083944537	4.31010170851779	-0.0327487829212945	0.00943761068028292	72.0494670589979	162.352265054294	3.18272534270273	3.75690331924461	0.292143967012134	0.410399373149889	1.18480318761019	0.875733027200855	5.28229330055254	8.65037754388448	3.18272534270273	0.27977129453197	16.9000078435571	3.18287607704472	1.82426088496361	8.65154446360335	0.432434505900102	21.6376640460639	66.7812712848357	88.2670751266395	240.884568098005	0.154725209687041	36.2486680822978	128.456261000587	40.6539261969563	45.9247693044752	19.166735488788
Male	Non-Hispanic White	264	15600500	2015000079270	W	N	14	13	'41410812051416'	FMFMMMF	10	3	56	132	171	171	14	132	5.12624430259611	4.10729731699062	0.353979283625603	0.0319966791959381	86.5979896084781	173.858366443652	3.65748212083781	5.03042423285326	0.216614882818103	1.38103008798123	1.37847901966315	0.780981426519946	4.76713088038191	9.08093020841656	3.65748212083781	0.435022193825591	21.3970101833826	3.65748212083781	2.22062090546735	9.94206718698676	0.451411778235595	22.6769413348879	50.1089930141647	116.330517551687	263.742098821348	0.488911190373689	45.7932568375529	183.13991954425	37.1168687762443	65.1706035669583	24.1158002737829
Female	Non-Hispanic Black	190	13602902	2015001131217	B	N	16	53	'521646'	FFM	NA	1	36	133	197	197	16	133	5.0935592060174	4.18705580397948	0.0975166641221418	-0.0203008180503033	72.5715134494577	159.693824958943	3.0285978200197	4.23778976172684	0.288547407497922	0.921860821262286	1.0157065268111	0.586244379391182	4.49347036285087	8.11188086144721	3.0285978200197	0.427975903243735	19.6619624653195	3.0285978200197	1.72740117538607	8.23258241986518	0.421573495434843	22.9620833673405	63.342875344902	82.5398110255378	237.92019482543	0.149126006694314	36.4160919940111	126.168376019429	34.4290823284639	49.0675057185279	18.014114584674
Male	Non-Hispanic White	271	14802513	2017000031931	W	N	50	33	'7050'	FM	30	1	48	134	610	610	50	134	5.18362657999643	4.5518394085452	0.727113643994597	0.00261164155344215	160	178.794700233856	5.1813714145836	6.83201258500912	0.291552833649742	1.90490645980347	0.825386087432371	1.09104560238431	9.8840010527514	14.0823523453232	5.1813714145836	0.58325946233681	46.3267410750447	5.1813714145836	3.61432217899525	14.0844269819822	0.790594639284336	29.8798553891853	68.2198845251737	180.645582955584	269.338689680938	0.714113716766068	53.9704473901316	254.295754374935	53.7882502209411	90.9635941012949	34.8885946888554
Male	Non-Hispanic White	57	10800103	2014000334801	W	N	27	41	'2427'	MM	30	1	08	135	334	334	27	135	5.18666360206991	4.43986043161418	0.0924824625305428	0.0454229910523796	92.9761393536461	187.182971018133	3.27608363471467	4.7267571242978	0.19395112941797	1.05805811844203	0.770146463586059	1.07832366123008	6.35975316018751	8.90388666274658	3.27608363471467	0.514668268223414	30.5072053569144	3.27608363471467	2.10865008217817	8.90531861275228	0.428998572705807	27.380270383953	45.3549532810742	116.074791040779	278.761321100697	0.461271182232358	37.1448325497541	182.196257607915	36.086797881232	58.5061031428892	22.8311350512359
Female	Non-Hispanic White	117	12001400	2018HU1390131	W	N	68	15	'6867'	FM	10	2	20	136	822	822	68	136	5.07124601420762	4.24992719726346	-0.0882461191905042	-0.0253401224587564	64.1793224162472	155.384997447131	2.67996747214985	3.30731626807309	0.226370089443829	0.534255946016497	0.708558780800238	0.569233131192888	4.22047668945264	7.28490673674777	2.67996747248164	0.306578034612973	14.6813398501114	7.26287063321553	1.28241012427143	7.28490688039938	0.386267501510891	22.9477990248977	52.4445712676852	75.2541781549096	233.089133918128	0.122909511101784	30.6050340514275	98.8852950199209	30.9035491523841	40.4427999120693	15.6167824252893
Male	Non-Hispanic White	156	12902800	2016001412669	W	N	22	17	'51502222171214'	MFMMMMM	NA	2	29	137	266	266	22	137	5.18973454788819	4.38312230627322	-0.285180277498203	-0.0043091687656642	60.2162367121378	178.649427365695	2.22499303392572	3.01002204926164	0.120661218184159	0.856075845114161	0.816317824409001	0.7743293985492	4.72653312593128	6.04815665605174	2.22499303392572	0.22892192924509	20.5306795216144	2.22499303392572	1.41937177853749	6.04815813238671	0.439943858104825	26.0635619051328	27.6749959098468	67.4357931709926	269.174542285036	0.291312731863413	24.4412126056649	114.378137587759	23.4712667577516	39.5536705468944	14.9727870373587
Female	Non-Hispanic White	117	12100400	2016000631240	W	N	71	37	'717146'	FFF	NA	2	21	138	857	857	71	138	5.08999673049464	4.34430319040599	-0.432031468974462	-0.0282218809280169	50.0124373467887	157.870464142111	2.19310454894366	2.55326086381561	0.212637334539157	0.555531244178526	0.540563917470946	0.583257766162041	2.28881404408126	5.96047093194407	2.19273758356648	0.17851811887323	11.9660308886557	5.95876870032172	1.25114086950338	5.96047867636831	0.270169185207032	21.8082182653908	45.2444662900233	65.641240524437	235.879869475447	0.100413361272697	24.348098420686	85.0615623769582	24.6927484456862	33.2310340589956	12.9305663600595
Male	Non-Hispanic White	153	12901807	2017001158712	W	N	57	21	'5757'	MF	45	3	29	139	686	686	57	139	5.18171995447354	4.50164890669008	0.214795418332437	-0.00941467091514026	111.770127040648	176.320838860944	3.91769457073066	5.44311175127514	0.199889456985989	1.65889851252453	1.67777379389654	0.706784027825695	6.95414567769	10.6488897700146	3.91769457073066	0.171413764860734	34.383305558506	3.91769457073066	2.34710357273571	10.6493979610079	0.678217576182204	27.5295663106791	52.662979711204	119.402104883469	266.538834540213	0.511745420780582	46.6677235162787	207.958449019433	42.274252006007	71.762009121237	26.1054436241768
Female	Mexican American	224	14500301	2018HU1112580	W	M	66	56	'6666'	FM	20	2	45	140	800	800	66	140	5.03083504117053	4.22289071765011	0.0517271210886846	0.0226621665550787	71.852674753244	156.569062681185	3.21557963600273	3.96624462933358	0.287494017317347	0.710131692506944	0.32160232499344	1.02020900777248	4.64826648059436	8.74085155658174	3.21557963600273	0.339320408566719	17.3842003636986	3.23501047919494	1.56047459490494	8.74085169118804	0.392022705326336	21.3451703539719	66.1628641289741	86.3063815682714	234.42000893254	0.151290817337585	36.4181407586974	128.143230378743	38.6379077936999	49.2085833975949	18.8449051748763
Male	Non-Hispanic White	262	14802900	2014001422908	W	N	11	67	'35113414'	FMMM	NA	2	48	141	136	136	11	141	5.00836541630465	3.77223895593605	-0.159221674101036	-0.0621162132837235	37.0777582531407	140.646437111291	1.79977189459637	2.6152486024073	0.0833070974519031	0.605752640209678	0.387784296910291	0.556424107568425	1.77722449329447	4.87526432868922	1.79977189459636	0.0833221183549972	6.37262917079578	4.8922872364526	1.08732906105533	4.8922872364526	0.313201336796665	19.6013652956949	20.009692622616	46.952141700832	224.972437159632	0.190384299617329	16.3427653555503	72.7450711078341	16.4422177352974	26.2786523424637	10.1224767364688
Male	Non-Hispanic White	154	12201500	2015000374259	W	N	17	14	'17555526'	MFMF	5	2	22	142	205	205	17	142	5.17673361271326	4.33841299527734	-0.214157545128419	-0.00424520978775073	61.8217627262971	176.353129577801	2.44481854099893	3.34334302992731	0.132925414894523	0.924622251279879	0.400971933140562	0.908771345171668	3.24405766469692	6.47738064389114	2.44481854099893	0.172967309997337	20.3856204463101	2.44481854099893	1.91731445594682	6.64570581287278	0.385087641899458	24.2868512282459	31.2958284036641	77.531275140994	266.575443371093	0.34146014037569	24.3789451918357	128.738611652238	25.9345329501253	39.6414816982525	16.2932146632165
Female	Non-Hispanic White	48	10607507	2015000163897	W	N	43	13	'541015431946'	MMMFFM	NA	3	06	143	519	519	43	143	5.10509074486618	4.28347444262626	-0.37625297058909	-0.0529810309327849	49.7604987771468	156.351974717589	2.19291949187851	2.79632278439122	0.200640373940873	0.359263727355525	0.710485060437373	0.661242217435811	3.12717596966404	5.96097317211222	2.19291949187851	0.211354059996863	14.477381765852	2.19684327233645	1.10208544129814	5.9609732015886	0.288323173484027	21.6914389522438	46.7094412146503	59.6922604321478	234.176193583774	0.10150409477751	25.5854346936823	91.0793215121423	26.4728077352309	36.2791813009006	12.8382384860943
Female	Other Hispanic	192	14201803	2016001446272	O	O	45	22	'134555'	MFM	NA	3	42	144	540	540	45	144	5.0496819676268	4.24894129292382	-0.14354611124939	-0.0252477667803441	60.6667141848071	152.084182663005	2.50879204824248	3.33395343137225	0.213875350793287	0.69781467143183	0.805465683552984	0.879421912081465	5.32053909793538	6.81954836481604	2.50879204824248	0.309415816718213	16.3645820034786	2.50879204824248	1.62658251588245	6.81960383611925	0.287335311082829	23.1816432044684	50.7491914671089	67.2345943595552	229.365582613597	0.124618387951327	28.8823439551569	103.158956140961	27.8123928338574	33.9067126533161	14.3857637450374
Male	Mexican American	260	15151085	2015001070433	W	M	90	18	'9086'	MF	45	4	51	145	1086	1086	90	145	4.97928898401732	3.92323934650355	0.16347459581983	0.0293251513098162	59.5439051623084	149.697132359529	2.22657373100845	3.02599302031749	0.109005068641577	0.767226545122103	0.691857972196162	0.522157608023494	2.85684579122632	6.03792634259235	2.22657373100845	0.303505040663018	19.0498449971477	6.05236980037545	1.13170943033768	6.05245491271959	0.0320793713455983	25.7423909359337	25.4519523877337	64.1286740072607	235.745207464294	0.260957894178677	20.8447456346981	106.549423672472	19.9038317843078	31.9970846349117	13.1226021537784
Male	Mexican American	199	13603103	2018HU0914308	W	M	63	20	'6368'	MF	30	2	36	146	764	764	63	146	5.13393241572286	4.41786006778925	-0.237735081053096	-0.0144044367060969	65.3740235892429	167.256402453952	2.38253969103053	3.3090336739294	0.130470158161027	0.827959846215803	0.55384343065309	0.824064423056234	3.36396013966099	6.47641377309972	2.38253969074763	0.297727495490712	21.228901507236	5.68619028708877	1.43597492946026	6.47641411078104	0.294909062443771	26.4387972813645	31.8850887388684	74.1577502340426	256.194513720718	0.323390343054712	22.073223120046	105.291889989236	24.678403173765	38.6566280101594	15.259839937285
Male	Non-Hispanic White	189	13904603	2018HU0610874	W	N	36	10	'2636'	FM	NA	2	39	147	436	436	36	147	5.18162888103209	4.48845957056486	-0.2271892257825	-0.0808347313994735	70.8999937072195	164.152216973165	2.62841025736486	3.8765283087124	0.153045911187878	0.90309667141548	1.02697234404835	0.891835484679786	3.99443674109861	7.14430581382678	2.62841025736486	0.354250808234352	24.5937868208908	2.62841025736486	1.17801874931358	7.14475983982423	0.366664461289969	25.9744776366455	35.7969861100457	80.6471989210044	252.620055526055	0.333563936262084	26.3333824381659	115.142594718909	26.91584162971	39.8263496790683	16.5997286290191
Male	Non-Hispanic White	189	14202001	2015000681769	W	N	22	13	'2122'	FM	NA	4	42	148	273	273	22	148	5.1794491235992	4.40514010776342	-0.243453435407139	0.00703508836938133	64.1796814545645	178.838687427021	2.40223307799859	3.53349122125616	0.135737675318398	0.885744214745804	0.799852909977573	0.762066853273242	3.45101705630976	6.52948223567306	2.40223307799859	0.400790969323863	22.2876634022392	2.40223307799859	1.70177390037916	6.5299465236468	0.306978155325421	25.7166754310267	33.1525202549627	83.571734708043	269.388385317828	0.350519058512805	26.9858710454264	132.492016178459	23.7900577386764	41.9374410661988	16.1783422509779
Female	Non-Hispanic White	153	13300100	2016000402267	W	N	80	23	'698180'	FMF	75	6	33	149	962	962	80	149	5.05371576610508	4.15006649412655	-0.0568213796920871	0.00712532251509886	59.9340693830185	157.723119671061	2.71582757670923	2.98229645622242	0.243976373656257	0.779342403670543	0.402991083285854	0.744930212145331	5.58408726151251	7.38228692638515	2.71582757670923	0.213296924164514	14.0314648933213	2.73631579945034	1.25334831250321	7.38238475099667	0.399647130080823	21.0684368540217	54.6497527658715	76.9028537355013	235.714735747855	0.129028071661589	31.9579237182823	110.303577054413	28.0962764203175	39.3142951592288	16.0040144895189
Male	Non-Hispanic White	223	14203208	2015000198516	W	N	20	9	'20212121202020'	MMMMMMM	NA	1	42	150	242	242	20	150	5.17547132129649	4.32437588955898	0.0270523610386455	0.0564054744779081	77.5892006480216	187.143704646379	2.82400539255958	3.9668883709778	0.164927867036659	0.716498417460909	1.36396312971906	0.894351934936659	5.18020716500531	7.67341478330053	2.82400539255958	0.436192216666251	25.7441860395672	2.8240053925596	1.68151361475699	7.67644254205645	0.496313907682564	26.474876943382	41.7816267007749	98.6642237665167	278.717462011963	0.367812682930159	33.3873515738544	159.96345074741	32.4918804344862	53.4206381308833	19.6774903930576
Female	Mexican American	223	14203101	2014000788605	W	M	67	28	'6775'	FM	NA	2	42	151	805	805	67	151	5.03341263193521	4.21122861289687	0.0639953524294788	0.0309943785208094	71.8962397714229	158.286551968237	3.18092096401676	3.53191789502771	0.289531948739138	0.680785493024586	0.761738064932516	0.969245349864506	4.33323519879212	8.64475669929939	3.18092096413271	0.289533869798874	17.3975576292523	3.74087179233814	1.96633627294785	8.64663964389514	0.352602974168291	21.6023345391879	64.6567661119186	88.2442320222012	236.345984733224	0.160037056303519	37.6477425184574	130.297530608691	35.9538075302239	46.5523071118425	18.7949474399774
Female	Non-Hispanic White	50	10605918	2015000906595	W	N	34	23	'34'	F	NA	0	06	152	414	414	34	152	5.10550227859315	4.28707030100936	-0.164495725944706	-0.0432747689270054	61.7179353505357	157.941941978483	2.7114395507543	3.20334115686285	0.219106563729554	0.608536100878783	0.720292067163301	0.756407328976356	2.33409386559509	7.36305367558901	2.7114395507543	0.393390713406208	18.003585016505	2.71143957864861	1.59655503546652	7.37045684296867	0.438169560166899	21.7620546928167	56.8033396770151	69.9703831077424	235.959963124272	0.13893619015174	32.6049911475238	111.483301914685	33.3671243006721	45.0908257671016	15.9947794102419
Male	Non-Hispanic White	41	10607102	2015000190795	W	N	4	31	'042201'	MFM	NA	2	06	153	52	52	4	153	4.65550801590694	2.87538426593856	0.3029899938965	0.040715511096179	24.007691539923	109.532742957713	2.13353336505673	1.94133576616454	0.0491603484978909	0.260275428203906	0.0808067756879577	0.277197300615776	1.14485647790656	3.37969844435745	1.24385689133845	0.0410340293560478	3.45068768072129	3.3797140455117	0.459008292589436	3.3797140455117	0.122355038035594	18.294584493433	11.0009543184588	23.9448253886945	186.505109627377	0.111693805351184	9.3547047682942	44.5331545473443	9.36258600858643	14.818477153003	5.79717242678874
Female	Non-Hispanic White	147	13400502	2015001444822	W	N	87	36	'87'	F	15	3	34	154	1051	1051	87	154	4.96025769143452	3.73176410059008	-0.428604720785673	-0.0788197888115864	27.1984335019772	131.820072105343	1.26010720960474	1.54230138482553	0.0962270841224523	0.305868281951752	0.442044430800726	0.282753269850121	1.43718732452669	3.42532088718429	1.26010725716165	0.172793238176725	6.36588876171831	3.42532652688466	0.717731225243244	3.42532652686462	0.168509002778572	20.5842173708676	21.0861477955295	27.6598504968016	206.039920236882	0.0525558494640028	13.2355284749112	47.1844868451614	12.3353972563869	17.2429324517208	6.49080971843779
Female	Mexican American	178	12503306	2016001166402	W	M	2	41	'33390200'	FMFM	NA	3	25	155	28	28	2	155	4.48665929771756	2.55656979618418	-0.0536806903895809	0.0213744685334783	12.2177413668234	90.7432206026134	1.47780642924904	0.930215881211474	0.040875652329792	0.116480714377575	0.0613451906140189	0.120110656587196	0.312890342247963	1.91780554011272	1.0544254428586	0.0179001038143072	1.59556307912092	1.91780554026657	0.260434873429466	1.91780554026657	0.0711422119946375	17.317326311213	9.00608775723384	12.797359386277	155.713352852427	0.0222688032826178	5.66125499516694	19.5850006980664	5.24839317862645	7.56274756077335	2.7464769074658
Male	Non-Hispanic White	192	13903700	2016001211776	W	N	44	16	'7444074015'	MMFFM	NA	2	39	156	528	528	44	156	5.18350095803104	4.50811610808369	0.222641288731191	0.0187708979616452	113.381404550924	181.684534461524	3.87125604913361	5.58870558211627	0.219079604325632	1.18660621869313	1.80245560493122	1.04717684537624	7.63287318123716	10.3360524499175	3.87125604913361	0.423478856057452	35.6986594176418	3.87125604913361	2.25870242739684	10.5231649715893	0.549788128436809	28.2880148230699	48.8122409690791	123.911189846542	272.597100547539	0.567549458787523	41.5418168924488	192.60919969375	43.3398754955347	61.5710572923713	26.3823293617735
Male	Non-Hispanic White	45	10608512	2016000307222	W	N	59	16	'595921'	FMM	NA	4	06	157	709	709	59	157	5.18044105457741	4.52540132035375	0.0653045139726972	0.056619213496117	98.5639754525584	188.116277329529	3.44367175709202	4.62822876153359	0.200487083066354	1.50981507697742	1.18435606559696	1.13708034528794	6.16243117254254	9.36086690164089	3.44367175709202	0.723000838207966	31.44479668784	3.44367175709202	2.32558625466075	9.36087036045911	0.798935885340518	27.6217683928709	48.868931265534	118.978091231855	279.80311412021	0.474781141970718	41.7292846104397	166.68934251389	37.8579173803777	62.3299753771805	24.088752041054
Female	Non-Hispanic White	264	15310902	2017000126285	W	N	52	23	'52082646811605221226'	FMFMFFFMFF	NA	3	53	158	627	627	52	158	5.09676800025348	4.28605265164187	-0.126639665846995	-0.0236473720229697	64.0339227429316	159.671827094928	2.89572743201038	3.43924470451896	0.246332815852393	0.565741565689345	0.689877508045476	0.896708456119477	2.78291312788654	7.86776234421216	2.8956603528767	0.376207987653487	16.3328356429493	3.30934321686779	1.94788481849272	7.8712209183397	0.306038406224231	21.1137547016925	56.3416515719333	86.5289633160015	237.895614227758	0.136329904480914	33.871477996256	107.129648949096	32.3557078881762	45.0636667855191	17.2216224560642
Male	Non-Hispanic White	151	12200800	2018HU0509295	W	N	62	31	'5862'	FM	NA	1	22	159	751	751	62	159	5.17598196009923	4.51250869425703	0.579539156907486	0.0449011312463453	160	185.09756997986	5.08149287366389	6.88474869367414	0.296847553119939	1.42020679281774	2.43872332589326	1.5485511008936	10.9888211880653	13.8083113083387	5.08149287366389	0.484649887617286	44.4366712844055	5.08149287366389	4.15948389661707	13.8129297263511	1.18125733759833	30.486809876137	70.5720231356478	154.109871341986	276.428807228509	0.677659180617927	58.7209844923634	291.40279430782	55.5101820453648	92.2195110557061	35.1167753501769
Male	Non-Hispanic White	151	12500300	2018HU0445140	W	N	22	19	'2221'	MM	NA	1	25	160	266	266	22	160	5.18973454788819	4.38312230627322	-0.0726921339999635	-0.000509204297040955	74.4725180632218	179.329580302085	2.74073034071635	3.7504217034629	0.140329874375705	0.898519589731544	1.15269069741444	0.429125964935813	4.12578319170374	7.44906278794231	2.74073034071635	0.609675499949828	25.4498365601243	2.74073034071635	1.90304436168222	7.45007716274737	0.557902085430918	26.1725083481786	37.3160135506021	90.1614926796937	269.942776761346	0.413120251096013	31.1525481722277	137.390914516336	29.5413137075583	46.3992545544867	18.496008963176
Female	Non-Hispanic Black	187	13603702	2017000562017	B	N	82	37	'826177'	FFM	30	2	36	161	985	985	82	161	4.93135489580316	4.19621980980934	0.230239166760276	0.0488330547187147	83.6347393774912	145.501726209192	3.62635217726811	4.41538747891992	0.297216358022526	0.73147097321332	0.995097710591794	1.09428104477325	5.47561455395997	9.84625734289344	3.6263521697887	0.396597249098785	19.0289767675121	3.62635216536092	2.29201558569591	9.85744718515419	0.444384592552148	22.06304946783	64.5028727088721	88.6234023129961	221.879063293411	0.171144745618795	41.8915908719864	129.995788430831	42.0303865784144	51.59983748138	20.1152905405579
Male	Non-Hispanic White	11	10400127	2018HU0799360	W	N	29	39	'072629'	FFM	20	6	04	162	352	352	29	162	5.19186837357073	4.4806114117228	0.303426573059038	0.0255023003191531	119.586263923387	184.448570489856	4.15897191798579	5.59680953277075	0.260403498158428	1.37743665808002	0.960276128031532	0.935797758198761	6.11527449546634	11.3052381466512	4.15897191798579	0.715916115095202	37.9979590991256	4.15897191798579	2.39499802935288	11.3052577582946	0.609281100810609	27.7538041327537	56.9275047494498	145.263135207674	275.701565514434	0.616949608548328	43.6340969202457	221.905639345022	46.7954944326017	73.8739831960809	28.6658767179813
Male	Non-Hispanic White	225	14701604	2017001064156	W	N	67	24	'6767'	MF	NA	5	47	163	813	813	67	163	5.16679062625545	4.47929922687922	0.148532795778145	-0.0047242896185866	102.292056682692	174.52471007589	3.53673451356191	4.84264675316025	0.191207726700115	1.15772048244571	1.27766224639185	0.987047131802882	9.07083300674154	9.61198551530975	3.53673451356191	0.406807858810772	31.5274334870922	3.53673451356191	1.89523751203534	9.6138411471136	0.559042936194009	27.9227411021226	49.9859864311494	108.036188325571	264.499865660841	0.452873856747379	37.7834173761917	184.067910050562	39.9389383141262	57.8606981192786	23.3866450928796
Male	Non-Hispanic White	276	15311506	2018HU0104968	W	N	18	55	'48182217'	FMFM	60	2	53	164	227	227	18	164	5.18292243734402	4.35089835519365	0.146321258951337	0.0167016925777176	89.767196560464	181.204119866724	3.325439261782	4.93633224885399	0.181368198361555	0.691175562895297	1.09099882975556	0.948890277406487	6.91976211391269	6.64543827692543	3.325439261782	0.300706957902604	29.1625750601149	3.325439261782	2.16211080503371	9.03948111661198	0.356378152035143	25.9940869442795	42.5191476391536	107.109745560301	272.05631583143	0.456524942836035	37.2873878112368	155.502357093678	39.1157762281883	59.5235546566004	22.6176688520401
Female	Non-Hispanic White	80	11209902	2015000347926	W	N	70	69	'7071'	FM	45	3	12	165	842	842	70	165	5.08370713508857	4.32264670885145	-0.0895977144464249	0.0174454446747255	68.9270703654483	164.211064619503	2.98156736447609	3.87606796611632	0.290354332516382	1.02456445044375	0.867212003854924	0.832682010619956	5.43891220759436	8.10381366119291	2.9815673644761	0.332530503242877	16.2844093632869	2.98156736447609	1.75454937672297	8.10474032997249	0.431961636043406	22.1177303544036	60.852023638333	85.1912303655265	242.950069137808	0.137530257242754	37.9098921704424	108.751223340147	35.6715228440659	42.2778993723976	18.1092999334625
Male	Non-Hispanic White	182	13900910	2015000015937	W	N	60	11	'60'	M	30	2	39	166	727	727	60	166	5.17866681318821	4.54277026419781	-0.0670522414126412	-0.0412336773030493	87.8576615702295	170.278126066177	3.22084340666222	4.33989115554774	0.167530394949386	1.22668987850943	1.11224245457394	0.625776757787292	5.70240206427547	8.75306362839702	3.22084340666222	0.300633349771989	28.2773021439869	3.22084340666222	2.0910110040748	8.7551601046417	0.32272381738282	26.2778432470509	44.5177934001138	95.5054207572588	259.658120043432	0.430714027906849	34.8021308450739	149.827134209798	35.46588576059	52.7364044094958	20.9079535982049
Female	Non-Hispanic Black	163	12200400	2016000299765	B	N	28	69	'2350345028'	MFFMF	NA	0	22	167	341	341	28	167	5.10334738583725	4.42229220207943	0.0431444894610986	0.0526585873375031	86.9589955071515	173.470225407313	3.54465758182623	4.88384321054714	0.341390764642968	0.713383340797767	1.33639582318363	1.09975630643436	4.02552422561739	9.63537809198624	3.54465758182592	0.343939174854635	23.4289832746107	3.54465758182585	2.37283599225581	9.63537829270199	0.476283133792866	23.5324106771292	69.7886155253913	108.94827516506	253.153491486807	0.158723047051524	46.9931596200913	153.314185786462	47.1843975276499	56.7989219263311	22.4335610741099
Female	Other	261	15311613	2015000348950	O	N	75	45	'5675'	MF	15	4	53	168	902	902	75	168	5.00181039956963	4.27422355646793	0.0707121520423973	0.0701959923498553	77.0870812766931	159.494014028615	3.42095242213273	4.33559992740524	0.318216907106432	0.643097716081451	0.695314040512715	1.24908128017657	4.77252899830263	9.2988747775602	3.42095242213273	0.272362274915018	18.0864384415891	3.42095242213273	1.57801755216381	9.29911280510443	0.460198709038292	21.5338068948163	65.0263492496121	102.288669320122	237.696893323885	0.177037223174592	36.8283583798464	144.837643432581	39.0091282551077	49.2428576844576	20.3287440737442
Male	Non-Hispanic White	83	11208621	2017001205094	W	N	10	6	'46521210'	FMMM	30	2	12	169	124	124	10	169	4.96383737405529	3.64662730837718	-0.242141819495162	0.0161536761674693	30.0988055692277	145.473079696126	1.60518294718583	2.18638096293951	0.0697251200129035	0.628935992521706	0.279831776976888	0.379809276098496	0.933132359063886	4.18533136384942	1.53971954301037	0.0966355939975331	4.93987918963094	4.18539165427782	1.04026257536855	4.18539165427782	0.12532121349269	18.5482389668165	19.3477627117299	45.1646900035021	230.738325546658	0.187114466781764	13.7951605149683	66.8598708010473	14.024041060142	20.4359435333312	8.88180772827075
Female	Other Hispanic	187	13601300	2014000491007	W	O	30	32	'3029'	FM	NA	0	36	170	363	363	30	170	5.07374035674436	4.27035078307393	-0.292980349826813	-0.0537765632564595	53.3764924765141	151.405821818093	2.35321163334046	3.1174304973129	0.200600251676276	0.630545878225665	0.531945243366302	0.807058190484622	2.6275344548581	6.39669168915238	2.35321163334046	0.243797100416515	15.4989698853841	2.35321163334051	1.22453124651167	6.39669241960465	0.384358482427992	21.6824020923344	43.4241374319175	62.2483017888731	228.597852166991	0.101848646825543	25.8613734972183	88.1256566620738	26.0103352683145	34.8586983825768	13.4484781269002
Male	Other	256	14804617	2016001087131	O	N	12	16	'09321206'	FFMM	30	1	48	171	152	152	12	171	5.04610834998213	3.92520802759886	0.420133581094771	0.175271549796974	77.1183772882122	185.189550860199	3.44588147576719	4.68751139052245	0.193080986075691	1.29817671729421	1.57829515326411	0.989022948001146	6.81313553678283	9.07046987624012	3.44588147576752	0.282107817842359	14.0193377142302	3.44588147576719	2.11670162233469	9.36687699857284	0.430317600264673	21.3798693688507	46.6659603390513	113.922071193095	276.531825541982	0.442671701918903	38.554933016107	192.879664587397	39.2587304445985	62.2938701679051	23.82239737738
Female	Non-Hispanic White	94	10900300	2018HU0310164	W	N	48	67	'49481310'	MFMF	15	2	09	172	578	578	48	172	5.10527928610876	4.30401656371934	-0.0809733208616849	-0.0485519946679822	68.2408420645651	157.075611518005	2.69954582240485	3.27499405608351	0.242114113273988	0.630992731794596	0.72324072992203	0.751620515353162	4.35987316908935	7.32374295613055	2.69954582240956	0.345036144392053	17.730855672844	6.58081879008108	1.75403341151779	7.33812635413361	0.428449787429267	24.278638168762	51.5861529646421	78.7379186648079	234.988594561679	0.133685036230484	30.9974796356947	99.8587080868059	33.0961829142728	42.0834265630296	15.8590619690441
Male	Other	45	10609702	2016000701711	A	N	55	30	'5555'	FM	NA	3	06	173	668	668	55	173	5.13211955202529	4.389667922031	-0.3695512798015	-0.0550270829463333	55.7076033068978	160.307279302265	2.20421282525873	3.13780953680163	0.124457735138168	0.725722543926979	0.541501628636693	0.628804497188068	2.62702451729578	5.97976245112026	2.20421282525849	0.213163638407597	19.4038423041855	2.2042128252585	1.32184457386166	5.99167166871778	0.423950467930088	24.2732416164781	26.3315401220403	65.2776321730439	248.169093568692	0.286353439289564	22.1454116915388	104.839983648279	23.4594800870145	37.9924930824185	13.6754374719222
Male	Non-Hispanic White	223	14202701	2014001009409	W	N	55	18	'554820'	MFM	NA	1	42	174	669	669	55	174	5.18021380729698	4.46890200017127	-0.240651806570194	-0.00997854530363836	68.5970954599211	175.956228428056	2.60737874752085	3.69589296243817	0.144183046455264	1.0462634060248	0.876622214494498	0.637225797690127	3.57953667800344	7.04045733903743	2.60737874752085	0.402671470617129	23.315253346068	2.60821459788351	1.5143057074897	7.08759026929619	0.420387766199054	25.3088343130605	33.1398927441925	80.2809959040797	266.125349742614	0.329250235335842	29.7823739793299	144.839705319675	26.3244539348727	47.3842456847096	17.3472395273861
Male	Non-Hispanic Black	55	10601100	2017000697316	B	N	72	14	'7263'	MF	NA	1	06	175	872	872	72	175	5.1512411913519	4.43710157508017	-0.126294568734071	0.0823572578679876	74.5005871338768	187.46617876497	2.75420597394448	3.59008166794752	0.155614766495977	0.71966568528401	0.923502511387603	1.00436600584646	5.09257525152851	7.48574537497606	2.75420597394448	0.61264865512471	24.3608684820904	2.75420597394448	1.98422002849472	7.48670805064547	0.4238385373922	26.049751485064	39.2415362310156	95.1550455131253	279.077585624041	0.390856501083701	29.5913232519749	141.589845963159	31.813847181853	46.6261514989599	19.2159288379934
Male	Non-Hispanic White	239	14500302	2015000259515	W	N	56	8	'49561916'	FMFF	NA	2	45	176	683	683	56	176	5.18334326767473	4.5023168288599	-0.378951416340389	-0.00160648114323897	61.7667635104709	177.991676245241	2.31199116837733	3.19048110770973	0.139240143434779	0.722734813218005	0.498927421560536	0.620141259214717	5.52150293624467	6.28247766653598	2.31199116837733	0.459551107731673	20.3219493897927	2.31199116837733	1.48755496694182	6.28464358050882	0.277796492501461	25.7158302139284	30.9413904613868	77.4156066463196	268.430914944385	0.308389353048938	24.1201237452117	118.418908443497	25.3539867004007	39.668086312478	15.5152476167716
Female	Other Hispanic	203	13703400	2014000174180	W	O	20	119	'48172055'	FFFM	NA	2	37	177	250	250	20	177	5.07925592984704	4.18506497707331	0.114789220018945	0.00709762389939783	73.6890488387091	161.798794452439	3.10279894567165	4.55003606183893	0.287533827820498	0.692149900176117	0.913667535856335	0.911293420992588	3.77386112295039	8.42904478248401	3.10279894567165	0.189342769367608	20.287797030779	3.10279894567165	1.64430813938395	8.43428197102967	0.418348250261643	22.7492180863037	66.1229051439732	99.0045997286305	240.268410598018	0.146898601203705	35.3665167641855	131.588611429164	38.6896114288802	46.0182000119677	18.6376142770433
Female	Other	176	12700500	2018HU1311024	A	N	50	42	'273150'	MMF	40	4	27	178	602	602	50	178	5.07253620018853	4.15008666370325	0.239782895035494	0.0696735817275513	80.6299008285326	171.093430060308	3.4802278306664	4.35241405165735	0.334625480722159	0.757758774357405	0.886924108128843	0.779566705986958	4.80459083649633	9.46020317669356	3.48022783056233	0.571315702967706	19.9189761493261	3.48022783056233	1.7476696635417	9.46024007071501	0.446014818155992	22.1679949572453	76.9498623900146	97.3996402416952	250.547581111028	0.173300397870214	44.1627245108019	159.376594763723	43.7823182646179	58.162177926466	21.7990666165668
Female	Non-Hispanic White	131	11703411	2016000098046	W	N	16	12	'141711111316124149'	FMMFMFFFM	NA	1	17	179	201	201	16	179	5.09351943590492	4.13358241470599	-0.00480308754619509	0.0110625649415949	62.102070337995	164.775180248744	2.5985180136351	3.35447654400482	0.245263722035646	0.541599972572138	0.870587067180942	0.767427033912628	5.56011216532008	7.05918120284343	2.59851631334071	0.238605879344678	16.5573733027762	2.60494639208696	1.46324731549868	7.06349967550843	0.395657009914782	22.8990496304236	55.4508798878177	74.6276629028953	243.575757015021	0.116787999150608	31.2402098280494	105.266906476809	31.046558509966	40.4164486067284	15.8233894534461
Female	Non-Hispanic White	48	10609904	2014000676740	W	N	53	47	'63161253'	MMMF	60	3	06	180	638	638	53	180	5.09538345726891	4.29643883481695	-0.0359857053966752	-0.0616122978166031	70.842076811702	153.510836319723	3.08778783068943	4.00612260778074	0.278294474119958	0.619218375433001	0.821307387319106	0.718041663938493	4.38609919961433	8.39347449988319	3.08778783068969	0.564998748764202	17.7907346450266	3.08778783069116	1.79433123690118	8.39347755030002	0.443795873904219	21.9426633875569	58.5638411209106	86.3013225697673	230.977402299879	0.137699598989887	35.622604641257	124.400243582764	33.6963879993263	48.5471706437983	17.8302302996455
Male	Non-Hispanic White	251	14500105	2018HU0116377	W	N	39	55	'400939'	FFM	15	3	45	181	476	476	39	181	5.18844308470666	4.53580528568113	0.0162057053548884	-0.0173951105287628	94.8229047188437	176.099288324235	3.3427765623312	4.40661218677283	0.196716446437314	1.49750348504993	0.991185341807597	1.00880316317963	6.56736977561852	9.07782130409775	3.3427765623312	0.523217592683988	30.6773284558522	3.3427765623312	2.31316227817345	9.08660876067043	0.207795856258455	27.3665099807675	43.5002101931895	98.4498094543317	266.28761167545	0.423035291238072	35.6369161443441	170.561875216328	35.7587431799593	57.5793016370591	22.2534996786962
Male	Other	44	10606707	2014001230979	A	N	59	12	'245954'	MMF	NA	2	06	182	710	710	59	182	5.12594772531087	4.24633426531318	0.000392798052638171	0.0322080439262795	69.8763368536411	173.843552159246	2.61153195437646	3.39065569056319	0.123759026048683	0.929746281050355	1.21857595511155	0.845997567063779	4.48813257175206	7.09623332889379	2.61153195437646	0.425920556611446	23.4872638850299	2.61153195437646	1.35575565875918	7.09887985602072	0.392527191471913	25.7568377773593	35.1240613591269	86.2218836267505	263.725243756394	0.331002716729025	31.0724473964823	140.843500896305	27.1559060310503	42.1616877373886	17.2181725311386
Female	Non-Hispanic White	152	12702600	2018HU0058615	W	N	86	17	'8687'	FM	30	2	27	183	1036	1036	86	183	4.97600905233405	3.8022645039951	-0.00630722974093711	-0.0276021078702519	44.5208346619645	140.950243407284	1.90918223884011	2.31437964034675	0.175885267151137	0.497880093714101	0.516098616733926	0.505732504266275	3.66662348874563	5.18946050598485	1.90918223885899	0.253893660053084	9.87555665848503	5.18969538705584	1.20422087392455	5.18969538474662	0.21924159504974	22.3193215746694	35.8533828266894	51.6307199203478	216.652940126753	0.0810575522524808	21.0967883927528	70.4485717406452	21.8063407112251	27.0231157180768	10.3407486320622
Female	Non-Hispanic White	191	13703400	2014000081872	W	N	35	40	'16361135'	MMFF	15	2	37	184	427	427	35	184	5.10705351039541	4.28384265145859	0.0535238984845689	0.0188181332959032	76.5057996167952	168.320793486246	3.1548923982529	4.0084822514037	0.277813947685494	0.786361296817856	0.91641027215751	0.946111493918792	5.25314555469396	8.57588237918467	3.15489239825293	0.345435988920969	20.4937936501588	3.1548923982529	1.98545793764209	8.57588667691376	0.377172989521493	23.2498919009606	67.8371912215949	98.8186621736769	247.496203717056	0.161562910263213	38.9515472026149	135.271641106981	40.3309253248816	51.6533757427272	19.5205972925848
Female	Non-Hispanic White	122	11703401	2015000593027	W	N	81	25	'81'	F	35	2	17	185	974	974	81	185	5.04111467738546	4.09366617140253	0.0373872211079733	0.046606077950545	62.2434552026393	162.020157310747	2.84654400434004	3.42953334043496	0.274443179624835	0.816218023621907	0.692569525704977	0.76126828221589	3.79041248531554	7.73619285233248	2.84654400434004	0.39720310935588	15.0265496103239	2.86573096478898	1.45615595630968	7.73770884090483	0.392436510510731	20.8663246054649	60.369800084874	74.0054670609586	240.514908470694	0.139415776213651	32.7699424729116	118.485288339578	32.0998348775033	42.4807817444609	17.1159067665412
Male	Other	259	14802600	2015000246079	A	N	51	14	'4551'	FM	NA	2	48	186	614	614	51	186	5.13895592698167	4.32246976955124	-0.0612639655528839	0.0102536362252075	70.8954179137037	172.295247975188	2.64479523498801	3.40482692345401	0.144140416955278	0.808687964844308	0.936546009831834	0.842330601565244	4.81363071675763	7.1891169605189	2.64479523498801	0.352128986182425	23.5239350835232	2.64479523499618	1.91755331225602	7.18929882306976	0.381359591194446	25.805635829885	32.9776851992855	90.0628821421875	261.961661611619	0.352989806775	29.0665687567504	131.553199839205	28.3885011227439	43.172470397075	17.3208738594988
Female	Non-Hispanic White	79	10804103	2015001114458	W	N	80	81	'8480'	MF	10	1	08	187	969	969	80	187	5.04636513101863	4.11716630587087	0.677448612175477	0.0412094757898796	120.857832650703	161.996480033575	4.82712719214748	6.6090686318963	0.442256143650735	1.23039498159391	1.30188460729333	1.51268865883963	7.64640188268675	13.0975386565766	4.82712719244092	0.50389468858816	25.5181581954753	4.82712719214748	2.5647534111501	13.1214921292992	0.581173767275137	24.0372173427102	104.363865194867	142.159336528401	240.488546740709	0.22568396737638	53.1148036809779	203.993150712557	56.1052654469506	81.1463532353781	29.0217200843027
Male	Mexican American	262	14803306	2017001260027	W	M	43	38	'44431713'	FMMM	NA	1	48	188	525	525	43	188	5.13923848611342	4.42536451196151	0.0546053904509946	-0.0151700982512784	88.2320170648344	168.017541536819	3.14242868588894	4.65886779965812	0.163582358338364	0.989041867031026	0.973490029485875	0.781389705522371	6.8052804200587	8.48074841773355	3.14242868588894	0.223205130179382	28.4000548261345	3.14242868588894	2.14038480997358	8.54200678461125	0.472897564948165	27.0776513596123	37.7583308144209	97.8601086994216	257.068421715746	0.404002727100918	34.0828833379352	153.810078530756	30.1187641990562	49.6197767245175	20.1954795658939
Male	Non-Hispanic White	192	14101321	2018HU0320434	W	N	23	68	'17222344511621'	FMMFMFM	15	2	41	189	282	282	23	189	5.17794168297655	4.43923250340974	-0.124113161184941	-0.0349194533134757	74.8225524010003	171.232491014316	2.7430482015729	4.20542293480001	0.150130325957153	0.937161312733391	0.978292902416972	0.812338004989531	5.25532713521691	7.44616326528905	2.7430482015729	0.25943250696233	25.0307592643322	2.7430482015729	1.43042238091264	7.4563780809204	0.242163693547198	26.2771555228582	39.4814544244596	80.416633745974	260.74884469453	0.370662351174923	28.1816778431727	135.464953531946	29.1399490830981	42.9120648250228	17.8811662375385
Male	Non-Hispanic White	79	10900500	2018HU0051745	W	N	28	69	'592858'	MMF	NA	1	09	190	336	336	28	190	5.19016173696586	4.44882193239537	-0.0882099378528792	-0.0385088842629054	78.305042020361	172.716729836216	2.90615492023292	4.46938127119375	0.159628520667431	1.10758157654025	0.957593831966396	1.12481738386861	2.79908181058705	7.86537792342777	2.90615492023292	0.183804189347599	26.5090016431474	2.90615492023292	2.27713120483274	7.8997480396041	0.631645536359898	25.9445518802849	36.9601968056957	94.8023438578138	262.442137837755	0.396613168148068	31.410304035966	134.580402977381	29.5245703310559	54.0996578771166	19.0674377538409
Male	Mexican American	116	11801100	2018HU0742703	O	M	25	56	'555325'	MFM	45	3	18	191	300	300	25	191	5.14081574392251	4.44140880827655	-0.104437338694043	-0.0596311858922637	76.4755796479415	160.964614969452	2.79548854038186	3.91411473695644	0.146389654456749	0.870748913018069	0.76030485023172	1.01842307678933	5.12022994478475	7.59298196815013	2.79548854038186	0.455055024258246	25.5554893948304	2.79548854038186	2.08322658129951	7.5989257009855	0.129765133983726	26.3567852428023	32.2245228746198	74.1824850377016	248.931911043176	0.352149629348133	26.1001756429463	137.47640792463	28.3497897953878	42.8623669680633	17.3971576164139
Female	Non-Hispanic White	48	10608302	2014001402566	W	N	68	17	'2902076829'	FMFFM	NA	3	06	192	823	823	68	192	5.07115569345579	4.24996920552418	0.130685669506678	-0.0290277399082946	79.8903344631334	154.799070025055	3.49989514632421	4.54668101835897	0.308645710691407	0.617047682816358	0.959091353103417	1.02125720160681	4.77873803543662	9.50763383778707	3.49989514632248	0.258987353744017	19.2054921440007	3.49989544068502	1.61678580293446	9.51370137327653	0.415125759919636	21.8264936871261	71.7873488617466	99.8788774258567	232.429621450857	0.165429732533724	39.879302350847	140.016125863143	41.1906501874137	48.1945852408325	20.3369825994357
Female	Non-Hispanic White	94	10900902	2018HU1382431	W	N	49	8	'56124910'	MFFF	NA	1	09	193	595	595	49	193	5.09936027831727	4.32534080750515	0.136564024212027	0.0213255798518288	86.6524102514101	167.450177317736	3.51004626875813	4.37076422863027	0.342158111248121	0.738678893315491	1.02678705639653	1.11904229073973	5.01502858460072	9.53240247182725	3.51004626875788	0.502685053183316	23.2723571081577	3.51004626875788	2.24774584736243	9.54129498941502	0.608043985255235	23.686970944709	76.8908367932747	103.172331332142	246.535476552484	0.176734682799293	40.9546603327705	149.389877797334	43.7666266656064	58.2866914238902	21.6337732397373
Female	Non-Hispanic White	238	14203101	2015000511154	W	N	34	33	'350334'	MFF	5	1	42	194	408	408	34	194	5.10656718363343	4.30119662302322	-0.0119815794735314	-0.0477845515127361	72.9092154730333	157.398787416696	3.08848529432867	4.24344552513413	0.28300009708147	0.803484706916818	0.660713697896514	0.821803017296512	3.20226186912059	8.39537083220242	3.08848529432942	0.153061874432511	20.5892611427043	3.08848529432867	1.94820266942867	8.39537343652681	0.475880555930494	22.6067873163959	63.1381805448654	89.3660006865035	235.351110113041	0.146659195773552	37.1089182780755	124.816938605907	35.8792793411626	46.4003015733855	18.1719610647014
Female	Non-Hispanic White	12	10501600	2015000836552	W	N	27	18	'2909012708'	MMFFM	NA	2	05	195	327	327	27	195	5.10726167518459	4.30706859660311	0.00969244587409175	0.0118250169116868	74.9454894894752	167.182610674053	3.1123354829771	4.25517396386856	0.306491289568669	0.779783743548647	0.734293789500809	1.00801656326724	4.67579373991191	8.4601932829031	3.11233548297708	0.440162640319051	20.2287061120365	3.11233548297708	1.73852297882671	8.46020498743994	0.445795673698331	23.080144926339	66.5174708170071	87.2328435971465	246.239965424784	0.152575683655768	36.5497193921216	134.515157112001	36.9348310110242	49.8062468063683	19.1595345429651
Male	Other	223	14202703	2018HU0415475	N	N	64	6	'6459'	MF	60	3	42	196	775	775	64	196	5.13484670030771	4.40039731812218	-0.0419304865959287	-0.0298030278728796	78.137244980582	164.851269830772	2.91739227983105	3.96075472376174	0.15564258866715	0.734715987425475	1.21133600206969	0.684758943029216	4.7318814640653	7.9302541493554	2.91739227983105	0.259924741385471	25.7309818100926	2.91739227983105	1.8398433131035	7.93029442039652	0.583308940045639	25.7832493836266	35.0000149836538	90.4992362240162	253.426475946357	0.394962671699121	31.1405771944998	134.375879330576	29.3576759484015	48.0918775383465	18.4836111107673
Male	Mexican American	200	13604103	2017000869549	O	M	62	54	'61626954'	FMMF	NA	1	36	197	746	746	62	197	5.12085127599745	4.39977783317265	-0.0576865051455185	-0.0203562690723011	76.8681278282809	164.103119378504	2.82122833051609	4.06346190238812	0.140698808452102	0.851768994209457	0.980394248768538	0.992426796586059	5.89119466645024	7.66872615778477	2.82122833051609	0.382673156474073	24.836235031793	2.82122833051609	1.57828560351758	7.66889370477539	0.33591605770196	26.2463334487426	34.3771809122316	94.1034047936635	252.563384798004	0.34881682896887	27.6379866733628	140.467089293476	28.0143405742443	45.3327333120153	17.8134744110791
Male	Non-Hispanic White	273	15401300	2014000280693	W	N	56	12	'5556'	FM	NA	1	54	198	678	678	56	198	5.18583490448358	4.49097817075841	-0.068267718423623	-0.0609986127840554	83.3218193905529	168.146612402377	2.98856530578067	4.35319950614152	0.176795403784211	1.17766621989953	1.22020797250243	0.692162850062266	7.05120336258059	8.12373000091996	2.98856530578067	0.28445007574999	26.3000906617892	2.98856530608416	1.85869459531338	8.12376276386602	0.301997918196452	26.8802070108311	37.7779216079231	89.4577172259551	257.216517228449	0.39568955176772	31.8694189396662	139.552931716672	33.4486594943172	52.4751620078926	19.217708986567
Male	Other	189	14101324	2014000430164	A	N	52	20	'5052'	FM	25	2	41	199	626	626	52	199	5.13626972510882	4.29108501170387	-0.271431475057152	-0.0181755273222153	55.6818107775962	167.01676519824	2.13713864992435	2.8384279533945	0.110681424155775	0.585425433058521	0.606215367351173	0.634059315288764	4.29972925715067	5.80918857857756	2.13713864992435	0.227791896092462	18.7977307528508	2.13713864992435	1.46202404100813	5.80934515698677	0.359648755935161	25.0543745158115	24.6313062534064	60.1746467380473	255.919166628777	0.25714995789831	22.0767094661347	101.285531230338	22.6405756557743	36.8787249574155	13.6733685564698
Male	Non-Hispanic White	235	14202401	2017000225322	W	N	94	23	'7074708269698091878694766494838888649158'	MMMMMFFFMMMMFMMMFMFM	15	2	42	200	1136	1136	94	200	4.94235211322735	3.63955975641264	-0.345882133984142	-0.0629113931675341	26.941763319668	131.557066078813	1.06229729463177	1.42004439592656	0.0482410339197164	0.187055685923573	0.156014288737558	0.251251229516549	1.5488894745722	2.8876234278129	1.06229729462894	0.0912557167542493	9.19252830083662	2.88762343241106	0.533074958569886	2.88762343240834	0.143772856763504	24.1973132953161	12.0240465153279	27.835096301166	213.977641580314	0.107365214946251	9.55917702775878	41.4795542246068	9.11751186813865	14.762829251068	5.68269674404624
Male	Non-Hispanic White	163	12202300	2016001455262	W	N	93	40	'9364'	MF	NA	1	22	201	1121	1121	93	201	4.95945217668284	3.70230576739274	-0.370336399896334	-0.0123625249901306	27.9934167790221	140.764692909556	1.10447533045298	1.47803980045741	0.0533446949436685	0.294212119715964	0.390397785561117	0.29615228945906	1.2212883772413	3.00211770752578	1.1044748035824	0.105580778428999	9.51857621054598	3.00227378856812	0.642048012392564	3.00227378676051	0.142848767907199	24.2751136295924	12.8320179134455	28.5277050096558	225.11429020201	0.127740573785097	9.78018006270628	48.0091825797366	10.0754638838039	16.7503516486088	6.21582653635977
Male	Non-Hispanic White	152	12603100	2017001366106	W	N	30	23	'30586129'	MMFM	NA	1	26	202	370	370	30	202	5.17608151004189	4.43149758377303	0.0781389744481789	0.0309740624192237	90.8887797272796	182.555743909185	3.31992840252508	4.98459230094932	0.183904556389172	1.28696909207876	1.43214935591727	0.644019021222551	3.42456291942305	8.88565394134299	3.31992840252508	0.439405288202459	30.7770361888299	3.31992840252508	1.82669011853438	9.02450103649247	0.517602957287187	26.3767288650415	45.6899762856646	117.170761327771	273.576877541651	0.487869155279821	36.2161640544388	175.450513380933	36.177479893857	58.3855427096938	22.7063911506163
Male	Non-Hispanic Black	199	13500700	2014001323082	B	N	80	54	'8083'	MM	NA	2	35	203	962	962	80	203	5.14980438243756	4.36010936985697	0.175815273284936	-0.048570579666197	93.309753652219	164.224402877807	3.38395333268731	4.42458018434051	0.173429175402302	0.783113938117584	1.03794385522966	1.2187613934486	7.04738943354201	9.19853666939155	3.38395333268731	0.481531734065956	29.092322642269	3.38395333268731	1.80372949383593	9.19853885249625	0.473537912678519	26.5741845346664	38.870912645614	108.452911726199	252.70336816129	0.380926952513885	33.8065334131498	165.509377444745	31.0062211428758	51.30296749442	21.3784101217677
Male	Non-Hispanic White	47	10605302	2016000504078	W	N	19	26	'4119081244'	FMMFM	40	2	06	204	235	235	19	204	5.18646141580174	4.33308189736039	0.273172589252888	0.0211851109747114	100.108488869164	182.663657896816	3.53501050518667	5.08674710434176	0.20260463539095	1.30767873745184	1.01883363842389	0.988240400977814	6.28172731379037	9.5981825072466	3.53501050518667	0.420243146627894	31.9398384854039	3.53501050518667	2.30081167186577	9.60915478738899	0.581810108396925	27.3191489027491	48.3683897561064	109.419231930675	273.698157993638	0.482873024659884	37.1767872343644	195.827330323494	38.1963638109607	62.5226727443737	24.1881465939438
Male	Non-Hispanic Black	202	13602500	2018HU0404617	B	N	44	178	'10434416'	FFMM	NA	2	36	205	531	531	44	205	5.17462857532263	4.50211774652158	-0.134019321326019	-0.0242595121068086	78.8934671408929	172.495140181869	2.82554990873261	3.78106161037981	0.164976752105276	0.717394802765483	1.29933514071117	0.869208642912772	6.43513213847477	7.68031622341976	2.82554990873261	0.372835034932976	26.00923986313	2.82554990873261	1.62742028797746	7.68064096810349	0.476586883710784	26.9214558897246	34.8239170487688	89.3521556550709	262.189569106021	0.373013351307101	32.9846554678141	133.829593982372	27.5479154986837	47.419208034142	18.520742826454
Male	Non-Hispanic White	81	11300500	2017000871728	W	N	59	17	'5956'	MF	60	3	13	206	712	712	59	206	5.18271385181588	4.54013473219628	-0.241575000205873	0.00968393933710039	73.5937226481233	179.899397371358	2.66960017643304	3.67527065612738	0.144590603871692	0.81059310824385	0.798483630763577	0.894575390497054	6.63585036228957	7.18844264562694	2.66960017643304	0.417521941361745	23.5486977786027	2.66960017643304	1.81869268734288	7.25672564873628	0.491984185535235	26.5673201169978	39.5167815594264	89.1008832484402	270.585825950889	0.364345376779154	31.6262551833804	134.332774276732	31.2276474553483	47.6899560319898	18.0588992174693
Male	Non-Hispanic White	202	13603210	2017000164061	W	N	29	21	'270229'	FFM	NA	1	36	207	355	355	29	207	5.18735521250122	4.47004669297189	0.0555984814344802	-0.0579027455856108	92.3554920110363	168.924600911336	3.25831900189331	5.04863125566013	0.182021710758123	0.998989216766389	1.24134907467264	1.05352592436776	5.85415430192242	8.85702354071341	3.25831900189331	0.502829151563064	30.0537713438136	3.25831900189331	2.05143796764657	8.85702933291405	0.478041418872952	27.3445211955525	43.9107214422114	106.784730705637	258.1085779371	0.389591427421387	33.8269245671936	154.063095004171	37.5588238937071	55.5835645996196	21.0250021011028
Female	Other	47	10606709	2017000250431	A	N	3	37	'0321173903'	MMMFF	NA	2	06	208	40	40	3	208	4.58872093943549	2.71454012808816	-0.250757000246527	-0.0361922570922582	11.7491762040843	94.8720064210074	1.78691223430056	0.892117078918459	0.0427383413250862	0.135076354128001	0.0804304756058941	0.141726875538806	0.39111105330838	1.7869281009358	0.711861261777948	0.0109000948672305	1.49121293176488	1.78692810112855	0.289600931541238	1.78692810112855	0.0516948673525022	17.8728915588464	8.98005997404923	13.4407234524477	160.997368859461	0.0209920723359567	5.76210997735545	17.1604041338882	5.32035220954252	6.43283035653775	2.64588755671647
Female	Other Hispanic	116	11703420	2014000710027	W	O	40	55	'406060'	FFM	NA	2	17	209	489	489	40	209	5.06791375675895	4.27213679761715	-0.326657834514312	0.0333252549772053	51.7010950997208	164.225258319168	2.2528422616565	3.0031319192565	0.217540440946923	0.389450146756591	0.938374932340241	0.746722283284283	2.93680675062413	6.11154080347589	2.25284226165664	0.145030305323917	14.9708537759972	2.271444859244	1.3074616434464	6.12386018224545	0.30605290711175	21.9492743365407	45.5411147015184	62.9077024718381	242.965818638611	0.113665060227025	28.1301365381527	90.9332950851004	27.6853580141557	39.7290219653017	13.6840916091758
Female	Mexican American	223	14203502	2017001281776	W	M	68	18	'6868'	FM	15	3	42	210	823	823	68	210	5.04577285542296	4.30376096506626	0.103315025052699	-0.018721003356165	82.0292581325904	152.482807512141	3.57187403167307	4.44929382895089	0.313216453079727	0.807751940976022	0.981987633660401	0.935937687867352	5.43792093528756	9.70934102592217	3.57187403167307	0.246916527044821	19.2363681785595	3.57187403167307	1.73785209646717	9.70936024427481	0.404901136630918	21.9653278377703	66.4358879997271	95.1910837110203	229.816324248394	0.159336395271353	42.6574447624702	135.669027729717	37.9790251976829	56.104917332323	20.5218740159349
Female	Non-Hispanic White	175	12102700	2018HU0721160	W	N	59	18	'59198222'	FFFF	NA	3	21	211	718	718	59	211	5.09195410329845	4.32782677349658	-0.047143911621147	-0.023650078275773	72.2897870963762	158.904600456768	3.10239561890991	3.81169679721443	0.279307851009756	0.828712388509398	0.40481669706582	0.927912663121305	6.03822174638114	8.43317216538017	3.10239561891142	0.336041076762199	17.4846778139673	3.22600674203015	1.88479520057265	8.43318563547001	0.353292079513477	22.3012793905945	63.9885832032064	91.5097538806963	237.037778022908	0.134218018406931	34.918265419662	122.294775026651	38.5990719457222	46.6790337316652	18.3846241013602
Female	Non-Hispanic White	185	13604009	2018HU0767920	W	N	46	28	'1308114615'	FMFFM	15	4	36	212	563	563	46	212	5.10989630253689	4.32931792866843	-0.0252792760739815	-0.0390498993252498	73.998043420747	159.309110037377	3.09118531487834	4.29522385174042	0.288640160870639	0.86887394157931	1.22777752558782	0.850897904712574	3.72599182425485	8.40270884868668	3.09118422051581	0.321873149657734	20.1828944800907	3.0911842205158	1.75625773842316	8.40270989504693	0.558601667621405	22.9384126412238	65.8797413419185	85.6198445664745	237.490188968332	0.146746737397574	38.0088848092712	133.500487236107	38.4526517884324	48.6965912626847	18.3531481166556
Female	Non-Hispanic White	152	12601801	2017000097438	W	N	54	4	'5654'	MF	5	1	26	213	650	650	54	213	5.09501944841552	4.34086303955635	-0.120408254327856	-0.000352964117740712	68.0644319498531	163.149422655338	3.00738842289993	3.97363698890406	0.253480262245558	0.594116785872251	1.04344319517671	0.80686881048072	3.84366870492103	8.15573770440156	3.00738842289995	0.42969587016055	16.8986892389202	3.08812586462228	1.78381983451289	8.17492930108695	0.375333440957835	21.6324047241695	64.2071860891788	87.628558492684	241.771091068039	0.148878576916536	37.9846845831464	122.654970669924	37.7331351593346	49.3412480029359	18.1774895067476
Female	Non-Hispanic White	192	13903300	2017000055750	W	N	47	24	'1510481247'	FFMMF	25	2	39	214	575	575	47	214	5.1070657525879	4.30832446863584	0.0644587681921023	-0.0236706492038783	79.2639352826341	161.320828118803	3.27826790657822	4.16532864986477	0.292180186454964	1.17699437084705	0.81768360181843	0.815953901436256	4.47622316892653	8.91125018158959	3.27826790657822	0.478173097123156	21.9713579947049	3.27826790657822	1.43160566060365	8.91125607718979	0.489981252012889	23.1786020976449	64.766776611106	92.4688189249509	239.735884985661	0.146280971102698	39.3415099301679	135.840116167266	39.0641889998484	48.4038539010915	19.6479614450905
Male	Other Hispanic	45	10611300	2014000104497	W	O	58	102	'5857'	MF	30	4	06	215	701	701	58	215	5.12075468663564	4.41490317152365	-0.17032044645448	0.0178152729619381	69.7266588859489	170.471812350315	2.64297784493944	3.72019875870807	0.128665198489197	0.85597083066124	1.07662457448086	0.685513323824767	3.93730664591089	7.1843556825688	2.64297784493944	0.222151733534132	23.4227447661676	2.64297784494057	1.62451617948303	7.184358640758	0.450898483654449	25.3818552317629	35.474505535775	85.0614260164054	259.879603581406	0.324196361600084	23.6447122452644	125.203923782117	29.4970182483123	45.2948814513628	17.1714008654325
Female	Non-Hispanic White	152	12504303	2018HU0301051	W	N	64	57	'5864'	MF	NA	1	25	216	774	774	64	216	5.08797831023848	4.31054032310461	0.0357150397614195	0.00423463752460288	77.1888767319032	162.749620251703	3.4094464938521	4.44356154584848	0.315522140887703	0.917713367200911	0.963737962156184	0.911551956525064	3.21061869396395	9.26783602093623	3.4094464938521	0.383535087520383	18.7081766359271	3.4094464938521	2.34711488343444	9.26783644217754	0.444832798432242	21.639709076265	68.5751060203956	96.4197714110155	241.326604501249	0.160777618196096	43.1914435571847	149.48592377903	42.0011381780088	53.050635759104	20.5697536397504
Female	Non-Hispanic White	47	10605913	2018HU1239903	W	N	63	31	'4403220923420140422402630216424711'	MMMMFFMMMFFFFMFFM	NA	5	06	217	764	764	63	217	5.08753573801674	4.32068431215022	0.0355213961906194	-0.0536403620608043	77.9607666391371	153.529906083445	3.50638027241138	4.26199056119258	0.318555162618866	0.556614281070636	0.881103840732115	1.13947132651851	2.87942280407671	9.53131951802636	3.50638027813312	0.373868531576619	19.1278821536732	3.50638027233597	2.08350356581255	9.53132977795787	0.402259595161197	21.2339736662965	67.3920577649018	89.3404108342109	230.998921706261	0.157358844528901	40.2117498709766	140.171927190368	38.5793762821055	54.0400774225879	20.2492515500423
Female	Non-Hispanic White	260	15151164	2016000739330	W	N	67	16	'6775'	FM	NA	2	51	218	811	811	67	218	5.08308459418271	4.27750926864604	-0.127106985667302	0.0178252123380558	63.4595238502173	164.171203405699	2.79604068456261	3.80693685431523	0.242999754279794	0.320675678400361	0.787066254000232	0.701975767859151	5.47144779346546	7.58185546341018	2.79603956137103	0.221520723062257	15.0814928080571	2.79603956136536	1.71352244230388	7.60042353131203	0.405986467248346	21.6962181533758	55.2298983835494	83.9342187490931	242.905836832795	0.133310206976875	33.8383766427011	121.73622217246	34.775681291998	42.8571300063865	16.9793582367763
Female	Non-Hispanic White	263	15151095	2014001480025	W	N	9	20	'35093912'	FFMF	4	2	51	219	115	115	9	219	4.93402862786942	3.57371389921073	-0.1174149072763	-0.0460034453681315	31.6994392652823	132.691274089253	1.6766916595602	2.40216162750269	0.126920428455827	0.471230200367643	0.222385628854214	0.332911819393635	1.48002789645696	4.55765109830729	1.67669168434814	0.0908916918972596	4.41955423100416	4.55772047011132	0.733309811088696	4.55772047011132	0.218820172759691	17.905944384103	29.9318860398366	43.7936389563466	207.060370874542	0.0723070224373155	18.5191070727658	60.0661983365483	17.2954526111056	22.2313588333666	8.67940992176965
Female	Non-Hispanic White	235	14202200	2014000741162	W	N	79	88	'7983'	FM	NA	0	42	220	956	956	79	220	5.06027120203378	4.1783842728543	-0.179764941377725	-0.0381082705208484	54.5228201007557	151.739150501618	2.50641031675613	3.04192822723608	0.224657350748251	0.440251560160251	0.657698475981427	0.616387732840357	4.29890436888524	6.81309735886235	2.50641031675682	0.324762106103357	13.2112542903097	2.50641031675627	1.35185447768004	6.81312961804823	0.280395003313991	20.7533496954803	47.8477414478433	69.7412943329374	228.975201944894	0.117965880277388	28.0922950831822	100.201736910191	30.5434829539926	40.1963587710525	14.3476452109
Male	Non-Hispanic White	238	14202200	2018HU1232725	W	N	17	18	'548586171549'	FMFMMM	10	1	42	221	209	209	17	221	5.17598827290837	4.34720544310404	0.0155360138524129	-0.0391182934101308	78.4719673316766	170.182259848299	2.97934237197445	4.18367262024648	0.155216347494935	1.30462711805073	0.695191321985803	0.884719168240972	6.03210976826288	6.87707321270947	2.97934237197445	0.339371865558606	24.1198077810404	2.97934237197445	2.27260202575917	8.0986922304962	0.603156091610496	25.3386873794139	39.6783374328215	92.7999849470981	259.548472104374	0.3781543890981	29.8826755527932	145.102172930084	30.6907315906427	51.0838179754656	19.3320940130447
Female	Non-Hispanic White	83	11209911	2014001004963	W	N	16	14	'59185516'	MMFF	5	3	12	222	202	202	16	222	5.09407713963839	4.13475140435595	-0.346571549873777	-0.0666766578766247	44.1759204520998	152.535976814472	2.07271850094693	2.760866936809	0.20300801970721	0.563668338184831	0.417968970155415	0.480420660556053	1.58712179181182	5.42576514109296	2.07271850094693	0.228994296133145	13.1791326683598	2.07271864565533	0.880543557029949	5.63423303659872	0.219803249081366	20.3130342744824	41.3292706385371	57.0392362747015	229.876422701357	0.0926747538454665	23.2484268269815	82.0058639850928	22.4738308204241	29.4234700882734	11.9117278566149
Male	Non-Hispanic White	80	11208610	2016001472168	W	N	53	6	'5353'	MF	NA	2	12	223	637	637	53	223	5.18222889583686	4.51912249970616	0.17319576174095	0.0173533752564007	109.105822670514	181.1965350333	3.78149045995035	4.93450199591535	0.224283318598566	0.914408768770113	1.47286875366648	1.15214796151884	7.11349229458663	10.2789481141411	3.78149045995035	0.469951295924548	34.0784386952738	3.78149045995035	2.95771028437949	10.2791559903423	0.712569862577407	27.8525976267958	54.0694461830008	131.714398090903	272.047774996503	0.493014004338259	46.0495565834704	205.233020447414	35.258457840082	68.5478270031571	25.7186516449999
Male	Non-Hispanic Black	153	12901200	2014000853299	B	N	77	18	'7677'	FM	20	3	29	224	931	931	77	224	5.14706082917586	4.41892540909142	0.292481258537081	-0.0103949196472454	111.208483305871	170.147534303042	3.93575141798744	5.19939463282996	0.212175773815609	0.7319328698119	1.21667938040307	0.756368977222137	8.28089617732154	10.6984808424678	3.93575141798744	0.358792002562361	33.7104876647456	3.93575141798744	2.49190490092503	10.6984815606152	0.538502395625006	27.2559723659421	52.8397912863457	128.036190985507	259.508750607575	0.516437015616075	44.1679427029574	195.827252156613	39.0468611502185	68.9006072541532	25.5340483295978
Female	Mexican American	254	15151080	2016001314531	O	M	80	24	'80'	F	20	3	51	225	969	969	80	225	4.95020722664268	4.10895917685834	0.20503628924644	0.0312020594540975	74.7385083575107	145.679541207409	3.35211133707764	4.35854587627361	0.288323315251884	0.776848939878848	0.665384836065942	0.888590750280547	3.83744671939739	9.11198296761143	3.35211139722519	0.314721336960343	17.575992267316	3.35211133707764	2.16195510792368	9.11198333450374	0.46329284205954	21.2959504748036	60.1107047684887	89.4595252987498	222.082398001656	0.155574710150549	36.0696747773128	121.591447076091	37.9619755476443	53.1087031965535	18.6111231026685
Male	Non-Hispanic White	264	15310503	2015000603234	W	N	1	19	'01333804'	MFMM	122	5	53	226	20	20	1	226	4.43743194874075	2.49149450521504	0.0638956548967629	-0.0188993230864879	12.8763225050293	82.9744414181817	2.14182319266322	0.884151861441565	0.0248406366678607	0.175297189423221	0.0920139063475162	0.126162926319598	0.0957678965240851	2.14182302230148	1.14958970978194	0.0144043711563156	0.887317644995189	2.14182319266322	0.32123483980032	2.14182319266322	0.0614021594573511	16.3419060932276	6.37092376792094	14.389640713314	151.440144362019	0.0579385279453318	4.82927739297134	23.0489237712363	4.72239077430557	7.60495758793506	2.98311611859901
Male	Other	265	14804636	2017000610446	A	N	44	13	'44'	M	NA	2	48	227	529	529	44	227	5.15396829777374	4.46011672109785	0.0926233283776901	0.0371043903793218	94.8920613643439	179.66117001297	3.43628509692193	4.51559396738046	0.18360544136413	0.916646416382088	0.546257523279554	1.09082617293487	5.4046686022336	9.3404837619241	3.43628509692193	0.428768179103664	31.4021348750555	3.43628509692193	2.37531809607518	9.34079133380671	0.276246321839017	26.6147230767738	49.0400518013357	111.700789331532	270.317043967165	0.49694335079638	37.4844443617613	180.57137851028	35.6068541189843	65.1970246906632	23.222160740709
Female	Other	261	15310100	2015000800241	A	N	52	16	'282526523066'	MFMFMM	NA	5	53	228	630	630	52	228	5.05427093416464	4.0473514859816	0.305486483469436	0.0755173697945387	77.6986567400275	168.981341577167	3.40519843053678	4.31685313597767	0.306680026297286	0.934235330288325	0.78729295235822	1.03822385352832	3.48238824168835	9.25628826642713	3.40519843053678	0.402444900870866	19.3014138135639	3.40520047936965	2.05819742899883	9.25628901299252	0.502324838716067	21.8176590366217	67.5250818138848	110.892258862482	248.224291481324	0.169163544504112	43.3441686825749	142.495892241322	43.5818702209785	52.2190097458035	21.1313241943327
Male	Non-Hispanic White	120	12001000	2015000798389	W	N	13	46	'44094513'	FFMM	21	6	20	229	157	157	13	229	5.07781773225506	3.98013327815118	0.193556773522561	-0.0632814048070605	64.9546966105865	150.586297842955	3.03842446705695	4.28645438852752	0.158018200110009	0.891258869954773	0.764800849709721	0.514359634292155	3.67339549731518	8.03706740442009	3.03842446489466	0.269955280879966	14.7555352465302	3.03845600963339	1.63248307095108	8.25929400998479	0.282427604734777	20.3777559261584	35.4062544325679	87.9574813725975	236.794632633204	0.350657248752381	31.2299260472181	126.844019487241	27.8951001059105	49.2549869321939	17.9870651237118
Female	Non-Hispanic White	255	15311503	2015000049053	W	N	63	22	'63'	F	30	2	53	230	757	757	63	230	5.08686208116579	4.3442411239311	0.140206510616854	0.0226712206401249	88.6279822544539	165.593054857589	3.88173969068989	4.78571948559698	0.379995088697383	0.539787071065647	0.872239757865462	1.1520705159409	3.50737870336849	10.5480254414359	3.88173969068989	0.562464059558581	21.3397640167681	3.88173969068989	2.15800209076273	10.5516624640106	0.534469244748619	21.8320261832659	83.6987923711044	106.99726334826	244.481951198257	0.195760639850452	46.719815694187	161.510870529228	45.6274683868901	64.2702621806067	23.7253823405895
Female	Other Hispanic	203	13901900	2015001054620	W	O	6	17	'0600063941'	MFFMF	20	2	39	231	76	76	6	231	4.76997609671117	3.17419094663744	0.0493299494985828	-0.022567085455816	25.1163969083746	115.28519458358	3.44853240489066	1.7558923556691	0.0891167878605502	0.364146610632594	0.175359436035583	0.287124326655996	0.967354022734002	3.4530154579767	1.27036373815947	0.0582001132454456	2.89700058688479	3.45301567439324	0.527237795852435	3.45301567439324	0.13508310698611	18.7625951817238	20.1789876918294	28.5918701168532	186.335398767832	0.0462057761833858	10.1011861191307	41.697045350357	11.8533098852554	16.3308368197285	5.91751603810322
Male	Non-Hispanic White	271	14802700	2017001210993	W	N	61	30	'6160'	MF	NA	0	48	232	740	740	61	232	5.1655640192532	4.51016523828883	-0.0919852153771626	0.0190717738033144	82.9451895600182	178.508423941642	3.12551810615192	4.22411164040635	0.170530999132403	0.723444239488418	0.554617175024424	1.15941137323955	3.63238479706516	8.49524837456048	3.12551810615192	0.565063869152112	27.3093280788067	3.12551810615192	2.1582164692219	8.49603907246641	0.770126532808814	25.538060808785	44.9037854936829	95.5830500133015	269.015187122989	0.427330993199998	36.544082026389	169.416504380121	35.5956764953378	54.6262892039121	21.0202959545687
Female	Non-Hispanic White	261	15311300	2014001122198	W	N	59	27	'6159'	MF	50	3	53	233	719	719	59	233	5.09211209566996	4.32957833067648	0.0233262351960978	-0.0283759984470897	77.7038313648294	158.18039104226	3.40364748107864	4.18234295121438	0.286620141064992	0.964318893981092	0.909941579513365	0.582377903154633	3.86632176253788	9.25207281329671	3.40364748107719	0.482494608402796	19.1170609644407	3.40364748107718	2.31890273912532	9.25207309829249	0.444320840432337	21.8295767399031	69.3933743638383	94.8739996240643	236.227088912457	0.157005876178732	37.870872671536	138.169205243359	41.5257306394872	51.2744797846603	20.100843403477
Male	Non-Hispanic White	188	13604101	2015000647739	W	N	55	22	'555527'	MFM	NA	3	36	234	664	664	55	234	5.17531945190189	4.47842345467792	-0.00742796535598204	-0.0127388333182514	87.4437289979794	174.614488067169	3.10429050950123	4.450559437313	0.171212573106855	1.39032405217871	1.17759460664463	0.678802628328289	7.70861148963339	8.41821463970232	3.10429050950123	0.359852009114219	27.0526078998456	3.10429050950123	2.02547915440411	8.43833628848535	0.396787493158303	27.168668083848	42.6721296589524	101.582587054971	264.601905968008	0.388861314845916	34.6099182815004	153.728539687344	32.3548078918591	56.6572088704631	20.5350296373106
Female	Non-Hispanic White	153	13401003	2015000869759	W	N	31	22	'3127'	FM	60	2	34	235	377	377	31	235	5.1189566329012	4.31517754444293	-0.312463496785902	-0.0182040195187474	54.7465332828422	164.145398847218	2.34736008861891	2.90185399088242	0.230732139098983	0.522360493237353	0.903692515963691	0.67346695845517	3.90560215617606	6.37921283874835	2.34736008861891	0.266575780587326	15.7429356944133	2.34807294153587	1.12904942235063	6.38078627373348	0.280149932102398	22.3225969666276	51.0377158633033	68.8916329412479	242.877201172721	0.116250474434478	25.05891001879	102.766795742927	29.591581699523	36.0727343514421	14.2530062117078
Male	Non-Hispanic White	179	12603207	2015000870234	W	N	31	56	'0405317008'	FMMFF	NA	1	26	236	383	383	31	236	5.17858264124557	4.45944059117037	-0.28257105626888	-0.0372557446185411	65.1615476444629	170.942440850739	2.4312863315313	3.4452969079755	0.13386621968894	0.89328128340436	0.930613626513317	0.815641159953029	3.47042999443904	6.6089143244199	2.4312863315313	0.411948986752261	22.8174401341033	2.4312863315313	1.50768832361963	6.60892145459505	0.346320036791253	25.801264334597	29.1699446865726	69.6202134639711	260.417513285186	0.331522332130933	26.0543995069759	126.571682542318	25.3263616623706	39.0126700659056	15.8287385135411
Female	Mexican American	191	13701701	2017000743854	W	M	43	9	'16124347'	MFFM	NA	2	37	237	517	517	43	237	5.04513679857154	4.22902119470722	0.120479782419652	0.0624604619177827	77.4398090454738	165.272770004041	3.19637594769532	4.35354545512012	0.296980883562277	0.945587549672954	0.841982410063199	0.976432618499469	4.54975675867652	8.6789966283152	3.19637594769239	0.474431078441995	20.9713230761348	3.19637594769239	1.74914341671275	8.68865065520257	0.493717802037742	23.2273782285782	64.7591411084201	99.013062882611	244.127213436684	0.157647802661644	40.0333539789643	128.686927415471	36.4285870285281	50.8286297434243	19.5080588301546
Male	Other	49	10601304	2017000657872	A	N	83	14	'83'	M	60	1	06	238	999	999	83	238	5.18613926438415	3.74279006760804	-0.00416507815274884	-0.0153571306084555	42.040144762742	176.052480240614	1.70306513184383	2.29503248230797	0.0971591555496802	0.406360179846616	0.554307569999131	0.530885991597201	2.16543582152144	4.60002959050949	1.70306513184383	0.241774534538507	14.9436945147749	1.70306513184383	1.2112047877737	4.62941100050367	0.187524393289192	23.6849892488711	23.3272260074811	56.4152467141188	266.234524463556	0.22373805082309	20.2362400691083	90.3302834721982	18.6303988048002	27.7862467515297	11.3353683876726
Male	Non-Hispanic White	81	11212702	2014000215248	W	N	51	43	'4551'	FM	NA	3	12	239	619	619	51	239	5.17113687976533	4.50867002684055	-0.0838675651590935	0.020421419584206	83.4963118718111	179.748436675819	2.974200086282	3.90537325823672	0.180051581644431	1.56211102347571	0.962342139858606	0.887570702367457	6.86693221524331	8.08468246156327	2.974200086282	0.327614817422664	26.6759128319258	2.974200086282	1.88392067798744	8.08471294553052	0.506554186678857	27.0735355556353	41.0676164423898	106.602655036825	270.415513635177	0.406369894070562	34.1701487150255	151.585366390015	35.4147154786045	51.0499874414801	20.1067460996434
Female	Non-Hispanic White	120	11803300	2017000368870	W	N	13	28	'10151317481846'	FMFFMFF	NA	2	18	240	164	164	13	240	5.07485325712623	4.03110151403789	-0.217073517460723	-0.00963535341739015	45.33267144925	158.414957519802	2.14268551656407	2.99083426551409	0.1864840638725	0.794566753765257	0.846876107804089	0.594360599339756	2.98941613269778	5.33076985052474	2.14268551343542	0.196037246753243	10.5329154619608	2.14268554326437	1.59941400665617	5.82442309241924	0.310549835851095	20.1569412143725	42.9975523919129	55.8014180626516	236.489766974074	0.0986222336544477	24.2490656427455	82.9263062712717	25.6778029691075	31.4356623867464	12.6680799442767
Male	Mexican American	272	15155002	2017000005703	W	M	71	64	'7168'	MF	NA	4	51	241	859	859	71	241	5.10399028600678	4.37769736801995	-0.124224994711227	-0.0337342571866592	70.349267642607	159.215085775964	2.63767012778534	3.57728983152383	0.136745905536379	0.929405300239106	0.749032096865481	0.664245403632012	4.07622352456801	7.16991675379678	2.63767012778534	0.455020643172711	23.8211750726029	3.06731335059231	1.58727607454839	7.16993077526309	0.311448923600519	25.6709877408633	32.4898395353087	78.4643833306691	246.899905236344	0.342992256123321	25.5734850233584	115.762029515783	25.6012344821303	42.9835630657925	16.2810126148734
Female	Non-Hispanic White	191	13702201	2015001139843	W	N	31	24	'0431330604'	FFMMF	NA	2	37	242	373	373	31	242	5.12014382949403	4.31551562629258	0.108032952747221	-0.0024052327693266	83.3916829056437	166.957384417741	3.3800200427537	4.39001524817946	0.344897718869201	0.848716052160712	0.742921653051094	0.936259115704457	5.71915445955057	9.18773706133122	3.38002004275371	0.545925164253934	22.3827346386809	3.38002004276823	1.88072621566104	9.18784700467049	0.456987100359536	23.6719492342727	74.7851392250687	94.8862643615573	245.991125025439	0.174986875068959	40.6106019234099	148.388925859028	46.0187075967781	58.24436494028	20.7863733231379
Female	Non-Hispanic White	261	15401000	2015000557089	W	N	71	33	'7142'	FM	25	6	54	243	862	862	71	243	5.0881030758765	4.3388833396897	-0.052250731601345	-0.0308817732023969	72.7211750351884	157.153227804655	3.21825240836629	3.84506829021156	0.281630194342451	0.779643813609427	1.0106404670768	0.950296975024842	4.38693523446486	8.74602278940634	3.21825224103458	0.171804029228679	17.3695963682489	3.21825224103458	2.11529369206252	8.7481165862019	0.443468491039858	21.5964808189834	66.9773256001116	93.8873641680382	235.075675946937	0.146579197575791	38.6714552865692	112.622406821733	38.6473502978746	46.2016263929045	18.9133205232238
Female	Non-Hispanic White	94	11200102	2018HU0843267	W	N	0	82	'0000322503'	FFMFM	15	1	12	244	7	7	0	244	4.20285370779385	2.03513747318947	-0.65578362418388	-0.0225280211255151	3.97233407045956	65.3871454680798	0.700950516392291	0.095260984025142	0.0117083582379466	0.0270423448659177	0.00889873142838169	0.0302267721606166	0.0680833415804006	0.700950516392291	0.699027955568644	0.00260897220918452	0.076702437925209	0.700950516392291	0.0834023108303654	0.700950516392291	0.0174264245087643	15.4046873035698	2.84549875254708	4.16863326096618	121.782391469281	0.00649816664672806	1.6768527647877	5.58225209543839	1.67008651839445	2.09682010657632	0.785086274849874
Male	Non-Hispanic White	152	12603002	2018HU0211066	W	N	64	20	'32276455'	MFMF	NA	4	26	245	778	778	64	245	5.1722296620508	4.4728059627221	0.0247257762136035	-0.0129661059505482	89.7952195010035	174.036240471649	3.27109260712727	4.62398926003058	0.165971861197282	0.866157203121552	0.809106900230383	0.785374829803126	6.16091782163102	8.89175081554157	3.27109260712727	0.373773091578552	28.9761703835796	3.27109260712727	1.79030486977799	8.89175123217913	0.570342306563807	26.4511395077449	43.4907947907848	92.7554945031123	263.944448326141	0.392397536837328	32.1499528105063	158.253008436248	33.7609822655272	60.6551854698225	21.5846683402981
Female	Non-Hispanic White	203	13604013	2017000389948	W	N	32	17	'416103003261'	MMMFFF	20	2	36	246	387	387	32	246	5.10960464695604	4.31152413776881	-0.222476406887796	0.00803195228475735	59.6830303280672	166.940356053051	2.34260198685491	3.10997774651982	0.205148164164212	0.510850468353557	0.739318744880757	0.69974139587361	4.2491687303392	6.36780805746334	2.34260198685491	0.239082541026176	15.5083489646312	6.35897537890297	1.43035402756283	6.36785232941077	0.297359303255585	24.4772388408136	46.295177175051	67.7189857631481	245.972307888325	0.115838095455549	33.0273812830156	101.549533773417	29.3519914697295	36.9488476236734	14.4053804292619
Female	Other	264	15502500	2017001204117	A	N	10	7	'08304204100706'	FFMMFFM	10	4	55	247	125	125	10	247	4.9774916065542	3.71162751737847	-0.0997036886056931	-0.0360490581019712	37.037237622579	139.972020414301	1.93026607289607	2.69859718259173	0.166723853906532	0.218268074050176	0.315619963644523	0.499692264166233	1.92995612979451	5.11073285080285	1.93026607289494	0.0896905409233826	5.65087586070387	4.85512291819846	0.867669053052711	5.24700719004132	0.236372530798397	18.1876333230032	33.8396357810954	49.4867756263652	215.524247786489	0.0879168484768625	19.8611089944526	65.3925211324435	22.531446912616	26.1246412183368	10.4004785847115
Female	Mexican American	187	13601201	2014001233846	W	M	76	9	'7676'	FM	NA	2	36	248	923	923	76	248	5.03297409798901	4.12028879740183	-0.19334427451777	-0.0678252972238374	50.7516699543044	143.329876281904	2.18975869167204	2.59763089432115	0.190978857821995	0.569889378912471	0.607774320602466	0.603558828218257	3.21429176292094	5.95196689627118	2.18975869167223	0.188263093604343	11.637199531348	5.93786591586271	1.2712597932646	5.95238126028199	0.236039557090417	22.1768322908456	38.6187448539336	57.3741403626092	219.390470203424	0.0928516360064266	24.5089450836402	78.6366490890433	24.4014462139461	29.8469512648295	12.0103047249491
Female	Non-Hispanic White	194	13703800	2014000747337	W	N	71	14	'71'	F	15	3	37	249	862	862	71	249	5.0881030758765	4.3388833396897	-0.212092266125141	-0.0432509533689572	61.9787183415348	155.221343758014	2.85308665891305	3.50617343202731	0.269210339262595	0.641101414304683	0.938297797055797	0.664583751165335	3.25402275568365	7.74901192079163	2.85308244810336	0.232832065830293	15.4812253577517	2.85308244540676	1.38985616305195	7.7554821664447	0.37355869575016	20.7234235348914	56.7001608288922	77.9002322204957	232.904990074775	0.123572685512558	32.7689028889842	113.893560875034	33.4993355327621	43.816765028481	16.6124284657494
Male	Non-Hispanic White	119	11703412	2015001085595	W	N	18	17	'47511618'	FMFM	20	2	17	250	219	219	18	250	5.17838876672875	4.36716906322256	-0.110119122087085	-0.0157780449920936	70.6013976563558	174.619744592941	2.80314361878121	4.05756606492908	0.159449718007384	0.903189917418263	0.951657645924018	0.814006856114498	2.79171774616903	5.28455461909187	2.80314361877912	0.22587341185592	24.6089920965013	2.80314361877912	2.06634284764264	7.61973436148817	0.604162602181842	24.1865074566195	33.9850849367473	91.6285030487256	264.607880049197	0.390470108638044	26.211276768722	136.880797947519	28.5193923686189	48.1391876752214	18.5433472609644
Female	Non-Hispanic White	156	12801600	2015001440989	W	N	39	70	'48152139'	MFMF	7	3	28	251	472	472	39	251	5.10410076135834	4.31438333679146	0.0386614634084526	0.0183676871143911	77.7147288734364	167.748938585521	3.27438328060031	4.37512794462496	0.318990507594661	0.726984909631672	0.82048644226689	1.06885789950163	2.6596440602717	8.90050418991452	3.27438328060066	0.39804650183715	21.6039144924818	3.27438328060031	2.29853881880657	8.90069657106416	0.585416395699426	22.734157614923	67.8355287462339	98.1218214163199	246.865300793919	0.164082090098476	39.9733938306078	136.054386264364	41.3153351218324	50.1516883516109	20.2082903369994
Female	Non-Hispanic White	223	14203603	2015001322961	W	N	50	14	'2950'	MF	NA	2	42	252	606	606	50	252	5.09469488316752	4.3076149456736	-0.0577267777586135	-0.0735928659402051	70.0975727506219	151.578253633147	3.04450114561279	3.82300851440942	0.26294496869761	0.585893376624735	0.81366355853525	0.750653716594456	4.78834654570912	8.27322259483962	3.04450114561279	0.426809671894351	17.6574182339666	3.04450114561279	1.78836439640245	8.27581214084137	0.443059844090321	22.0243213577483	59.3109094676539	78.1793682159029	228.793082112481	0.142166358133923	37.3970804050456	125.537741256455	33.9768379381369	42.6896883470357	17.4140200149932
Male	Other Hispanic	188	13703600	2014000554731	W	O	43	62	'433718'	MFF	NA	1	37	253	526	526	43	253	5.14758775853727	4.43761196109228	0.398649250083674	0.0452813012664746	125.997392359268	179.984198298071	4.24944195572648	6.44459173066328	0.254014368862551	1.52629806082795	1.91760133453649	1.20113244985627	5.98718674912097	11.5509317339544	4.24944195572648	0.767825481262844	39.1252536461799	4.24944195572648	3.05439447526589	11.5511808404826	0.454539211379275	28.6503384849099	59.994590155478	145.464647789337	270.681481817582	0.609971059295885	45.5329226019239	222.507196128272	47.0279871134002	81.9883062860054	28.7561311368462
Female	Mexican American	189	13903300	2017000735484	W	M	50	11	'5051'	FM	45	3	39	254	600	600	50	254	5.05292829913344	4.33330214053993	-0.359472414208381	-0.0312898123104785	53.1878361459533	151.659592573567	2.50051522032604	2.99765916117623	0.236289060083095	0.593342189756527	0.581408843105312	0.697396501995726	2.17315459383673	6.79709351200557	2.50051522032608	0.245033309754306	14.362858543109	2.50051522036748	1.1402765264651	6.7971050851973	0.313299228472264	20.2707508090546	48.1903046089689	70.711345027861	228.885156033497	0.118394398496123	26.4571636407074	93.3642281789528	30.9734429600101	40.4336317601596	14.3082704092115
Male	Non-Hispanic White	264	15400300	2017000005566	W	N	50	38	'50141449'	MFMF	70	2	54	255	606	606	50	255	5.18183834844254	4.55086271705486	0.0599470602270344	0.033078894051776	100.56555237255	183.996593250439	3.61165765749664	4.94732930940162	0.202844609415153	1.25020590219602	1.08950370238677	1.19800124786707	5.37232144782617	9.81720317927138	3.61165765749664	0.525408056380165	32.1632953753542	3.61165765749664	2.47296239566617	9.81750210381402	0.191552089569874	26.844707862554	45.4315581993116	108.904540735067	275.194720815724	0.498243789763788	37.6480572243539	200.014602474266	38.3404257339051	62.203256278398	24.847728018419
Male	Other Hispanic	156	13401102	2014000070709	W	O	10	29	'35100534'	MMMF	NA	3	34	256	125	125	10	256	4.96126020167389	3.67368415269284	0.133909522447064	0.0327525771486248	45.0419228575777	147.527231462217	2.18334808316517	3.26018378771709	0.113025382710342	0.606927077990931	0.250005036877374	0.559988815393543	2.57326218007204	5.92610354731061	2.18334808302478	0.13213765390561	6.94270506310422	5.93495541928714	1.42167705206628	5.93495541928714	0.213868964076073	19.6297489657143	28.2133470205599	62.9909900179568	233.177641987053	0.250332475976835	20.8029134903951	86.7245377712108	20.5217343551292	33.0363221561806	12.7276989409168
Male	Non-Hispanic White	109	11700104	2014000512374	W	N	59	70	'59'	M	20	1	17	257	710	710	59	257	5.18131802531044	4.53036841684924	0.0841567705034263	0.0469520613005789	100.939889616169	186.469947485397	3.66006726042386	4.67413633316993	0.210583428011698	1.71312610381217	1.33924583846725	0.877564709245913	4.5317912540112	9.94719564444599	3.66006726042386	0.48824476753355	32.5500060359923	3.66006726042386	2.31888294361107	9.94909432415021	0.335750285040321	26.5786979948777	49.4234181696242	113.724881407627	277.964541190304	0.47069346077194	39.5913723804203	183.242493520058	37.5196575647089	65.1168842440336	25.4342229192343
Female	Non-Hispanic White	94	10800819	2014001316899	W	N	41	26	'44070541'	MMMF	NA	0	08	258	492	492	41	258	5.0983724468077	4.28595947958791	0.0765087917960449	0.0182887519595826	78.4505328502849	166.77760173893	3.15207507752721	3.71311464322284	0.283428233448835	1.17145504596529	1.25699261246606	0.847182163687125	5.94068591401079	8.56821416902664	3.15207506065699	0.377276220780818	21.2545406367485	3.15207506065699	1.82543272229723	8.56822835932284	0.413429369455836	23.8885357552156	62.2476930595862	96.7475954403103	245.792432561087	0.155784745358118	36.3796880947829	136.512321219144	40.5953061509433	46.6186482317565	19.3689049193504
Male	Non-Hispanic White	155	12601900	2016001446057	W	N	49	45	'49151948'	MFMF	NA	2	26	259	595	595	49	259	5.18036023293515	4.51361453309596	-0.232158603500907	-0.0216809891420256	72.3456936042126	173.934578658471	2.65712583944456	3.64114760532218	0.145469165133804	1.07833108197661	0.912281705754267	0.666605194399698	4.61756029884421	7.20838395843684	2.65712583944456	0.431590793339104	24.3588376274712	2.65712583944456	1.98480251137605	7.22281676666388	0.414477780846857	26.2270483129755	34.4523426337171	85.0897470892515	263.828804175437	0.379778163930375	27.3837091603999	140.021827870507	25.1988209374747	42.2608835081409	17.5256583191078
Female	Other	272	14806500	2017000793626	A	N	64	28	'6464'	FM	15	2	48	260	778	778	64	260	5.05488938155925	4.18634256414672	-0.0223755968607108	-0.00317545445898077	64.3261970426661	156.290104909099	2.89932888023419	3.44322849154743	0.274833783261371	0.521795984144327	0.940554414229411	0.875690475074004	4.17692065492895	7.88119292821904	2.89932888023451	0.116240767097848	15.9067041333377	2.89932888762995	1.57387530375841	7.88119300986711	0.37101992932022	21.1865816883355	59.235017648398	82.1331851488298	234.106691009323	0.138870827785764	33.8765217360775	126.063111929584	35.8776002873582	45.2376829552686	16.9688072574848
Female	Mexican American	262	14802504	2016001465204	O	M	44	20	'1017441853'	MMFMM	NA	3	48	261	533	533	44	261	5.05970164954791	4.34403152770163	0.209580179072069	-0.0386111012606413	94.974810781497	151.576515201213	3.73328925855789	4.9823168559414	0.327761716565219	0.778382905882914	1.49571810147472	1.0174664264214	6.29144033501702	10.1467566732906	3.73328925855789	0.616402105855913	24.8140191994226	3.73328925855789	2.30843317823152	10.1481323519192	0.450107173808844	24.4399817972273	74.6304194165098	100.315452204861	228.791114110339	0.170291356290619	42.6413776938817	146.827368273435	41.5315383901751	54.8857302447196	21.3535852190405
Female	Non-Hispanic White	7	10100800	2018HU1359165	W	N	51	30	'20505122'	MMFM	NA	1	01	262	622	622	51	262	5.09862840594759	4.2853591170153	-0.162646189489124	0.00208223847100293	61.7264747695225	164.138509979466	2.65006353595979	3.20131499158113	0.253733189326926	0.597129892386082	0.817033738912766	0.810357348588734	6.41396701735727	7.20361937083688	2.65006353595979	0.127371472587981	15.1953729744825	2.65006353595979	1.25115105726969	7.2036195540614	0.363333258752487	22.2924508910537	52.7969850255208	65.4083468884087	242.86955631468	0.134671509910594	33.8672067467093	104.546673996284	30.8166740002488	38.6945106940346	16.0904938796067
Female	Mexican American	225	14702002	2017000860322	W	M	21	76	'2123'	FF	NA	2	47	263	260	260	21	263	5.06435780138106	4.2021307798199	-0.0380957360681891	-0.0319418594940399	64.3305762918732	153.302936644345	2.60006804181556	3.57270909136005	0.209697612149846	0.758505009009562	0.818188891861515	0.519200611113146	3.35837495687328	7.06657351998075	2.60006799944786	0.277866982806089	17.1894107666961	6.16464511497314	1.2924927833316	7.06771759359044	0.373587295722871	23.7418822529612	50.9588401567037	74.420216207025	230.742753095764	0.120959248657923	28.9922110241078	99.4199014527907	30.1597041471576	42.127153450545	14.998671210683
Female	Non-Hispanic White	115	11701001	2015000987371	W	N	48	64	'4854'	FM	NA	1	17	264	583	583	48	264	5.10267815450641	4.30390196424188	0.128119035537284	-0.0450212034096614	84.1012138072611	157.221706275649	3.4162491306406	4.26307103204389	0.283081145069435	0.7085199118982	1.36038235472894	1.16448995825381	5.3539323816779	9.28625631639311	3.4162491306406	0.368139040649652	22.2454895514447	3.4162491306406	2.0974198817358	9.28632793275513	0.515504945969028	23.6179978658321	70.6378376089201	90.9159858591389	235.152496256819	0.165420566680439	37.499458929766	129.691830626563	40.4173817009416	53.3253191967379	20.0834877726331
Female	Mexican American	262	14804802	2017000846574	W	M	30	31	'00300133'	FFMM	NA	2	48	265	368	368	30	265	5.05644785313833	4.29405868189594	-0.205411080396526	-0.0522410947881102	59.6591541711442	149.038812462489	2.59014331426646	3.48148675706216	0.222535270185208	0.675890970816894	0.706865322705023	0.838420190139472	3.20293512492331	7.04073938005896	2.59014331426646	0.177555442356708	17.1807711086849	2.59014331432082	1.15313441650785	7.04073950427512	0.31479673867969	22.0331479507483	50.4656966290537	72.1395079076114	225.912234147815	0.108710084136067	29.7362780208467	108.20638525847	31.8790615687578	41.0827231167978	14.628626572224
Female	Non-Hispanic White	111	12000700	2016000347174	W	N	59	28	'59'	F	NA	6	20	266	715	715	59	266	5.09114493311895	4.32289280997848	0.112137890854178	0.0339828357097798	84.3547146085143	168.195630437717	3.55581762896107	4.28903570849888	0.347113703230465	0.975327811455311	0.884814323033097	1.20232567652842	5.57919166792163	9.66571434234139	3.55581762896107	0.492673236842343	19.9737991899563	3.55581762896168	2.44649021476166	9.66571444183572	0.511594655590256	22.7230149042151	74.7258222531154	107.887002430554	247.358162574241	0.17830755255279	40.6840129761335	156.513199307364	43.5112827971095	56.1558934325082	21.9890128787226
Male	Non-Hispanic White	192	14200102	2018HU0777926	W	N	46	13	'464616'	FMF	10	2	42	267	559	559	46	267	5.18347883967913	4.50803668661555	-0.102080191435677	0.0340218862497327	81.9374781764376	184.472559962441	3.02833035930946	3.70226363562258	0.174560381445614	0.820620859520846	1.10825065083313	1.15351834190078	3.82668362473506	8.22873336569285	3.02833035930946	0.366070053138855	27.7507970814132	3.02833035930946	2.26320589137908	8.23185538514467	0.535311090205858	26.0569813906041	43.8275358696379	103.026136986941	275.728458489029	0.44779563222564	36.5227817203427	164.340208155238	31.924059788795	54.6340614671827	20.8749215441982
Male	Non-Hispanic Black	47	10603754	2014000329643	B	N	45	19	'4544191214'	MFMMF	60	1	06	268	541	541	45	268	5.17981620901044	4.47540545051156	-0.382202597215858	0.00257799861065304	59.9315365545162	178.108730199632	2.19750180069572	3.25907768210213	0.113194625795991	0.581606568263713	0.775067476833698	0.653845663555157	5.05592671656428	5.97285617993959	2.19750180069572	0.217466309671083	20.1749516985584	2.19750180069572	1.74545332431907	5.97342921283719	0.428769896933465	26.2725767667367	30.6776986241097	70.8962094228457	268.563301687831	0.29584424858066	24.5193743904873	103.790952033055	22.4573845502658	39.8748481445654	14.7542084764949
Male	Other	183	14000702	2018HU0663679	O	N	43	23	'43'	M	NA	2	40	269	524	524	43	269	5.16190940119229	4.45952219660742	0.0512125634963938	0.0836886951631902	90.9886487844404	189.729257678927	3.29041782218073	4.3910638796116	0.182400851283452	1.33117294270623	1.54860575255775	0.976518251397748	4.57220443270265	8.9442659206067	3.29041782218073	0.565356867489965	29.7560606394188	3.29041782218073	2.2005085198996	8.94428295191669	0.343174922032398	26.652612434532	44.0154221025512	113.027213805931	281.600545996116	0.44006915706674	35.3776029340013	182.304910658401	34.8157807924603	58.4092031834053	23.1645863820361
Male	Non-Hispanic White	9	10500500	2014000398277	W	N	56	5	'6656'	FM	NA	1	05	270	678	678	56	270	5.18583490448358	4.49097817075841	-0.201673648408133	-0.0645413550580401	72.915739594067	167.551966251371	2.65980440159484	3.88046674815447	0.146961641090653	0.673480564695368	0.657341334041279	0.5291163723895	6.73960539328865	7.23007637459895	2.65980440159484	0.404434651104456	23.5446952316423	2.65980440159484	1.65492943961474	7.23009797211012	0.47006082441849	26.4139480145029	32.9842649371066	82.8611579955089	256.533985520863	0.367105441521198	28.3341580000825	133.454616941364	25.2331082220692	47.164611139591	17.0582555961765
Male	Non-Hispanic White	84	11302600	2014000349060	W	N	43	75	'43361214'	MFFF	15	4	13	271	522	522	43	271	5.18107648944953	4.49983205528309	0.192018386668764	0.0318734897277405	109.054792776943	183.634979313617	3.71955000451769	5.78343068154352	0.219796843289416	1.20381468301236	1.30027948157895	0.996879240860676	7.12706237266978	10.1106388234355	3.71955000451769	0.364216565133119	34.4820029193155	3.71955000451769	2.86413572030646	10.110784679654	0.548717264663893	28.3193511700307	54.4527046828632	120.296284119366	274.788984850905	0.53760574404738	38.1582781457454	193.171999646057	37.4660121399176	60.2471246793121	25.5522842460899
Male	Non-Hispanic Black	183	14001003	2016000136951	B	N	41	34	'41'	M	10	1	40	272	496	496	41	272	5.16023101736539	4.49236917836977	0.0205292506243847	0.0110073377904858	91.1857312268779	176.132817470521	3.19878039531427	4.3308794665295	0.171975295645678	1.06307977154818	1.09497814140766	0.740306103277669	7.16376155902628	8.69509526382602	3.19878039531427	0.539660052792379	29.5894212234671	3.19878039531427	2.02034038529341	8.69518662181376	0.576818680089316	27.5064055539577	45.1720065767649	100.841695512033	266.325636462034	0.387696348723466	37.5964918444557	156.95422704336	34.0916422696515	51.9489757097195	21.2979306171088
Female	Non-Hispanic White	145	12300800	2015000601128	W	N	55	40	'55'	F	30	1	23	273	661	661	55	273	5.09533196790271	4.36050174758015	-0.0490583715247249	0.0162249813743861	74.5480121391742	165.928496117252	3.25942332044129	4.58058213492794	0.301199086138062	0.517338622527281	0.832514756194004	1.00381928829354	3.60116954609769	8.85753028975252	3.25942332046431	0.54007965525092	18.7946952211508	3.25942332044129	1.68167491707775	8.86003118313109	0.519458281673172	21.871534259343	71.3831300224897	95.6966187118973	244.853291887185	0.176018400742699	37.3604396854494	126.928803351507	37.7668777626095	52.9972032951706	19.9520132415977
Male	Other Hispanic	146	12600700	2018HU0312969	W	O	23	31	'23'	M	NA	3	26	274	278	278	23	274	5.16383541757309	4.39141104161919	-0.0113203465031237	0.0921186903528997	79.845274653159	191.704305222864	2.90080559444007	4.3635252150626	0.177467845432322	1.14367286664402	0.791824273748091	1.12506064933538	4.59369218639159	7.74797034917999	2.90080559444007	0.526166983367035	26.4319520189178	2.90080559444007	2.18934095959815	7.88520713525508	0.380237680502761	26.5252070687527	42.1519882697903	102.049755636924	283.796255891202	0.407562419548487	33.0253493475315	160.912751298641	30.0925974520209	57.3684784767205	20.5809441692586
Female	Other	56	10606509	2014000468006	A	N	61	35	'506155302161'	MFMFFM	15	1	06	275	742	742	61	275	5.06174457451932	4.25863030280527	-0.100551138883495	-0.0460193934877374	63.9485698316007	150.76542936226	2.78718707306467	3.47177765184314	0.239380822122592	0.485303025768696	0.960054445060432	0.882287186975771	4.09708410671693	7.57196120165069	2.78715131413472	0.264833049877515	15.4716801401902	4.3436491549351	1.50698156794838	7.57626275964114	0.338811016706214	21.9440610229134	45.0568658522779	67.6723481637302	227.872302746304	0.123076805186184	31.997498908725	105.686822325715	29.552402007358	46.089932018493	15.8778647013566
Female	Non-Hispanic White	261	15311612	2014001436453	W	N	55	26	'5552'	FM	NA	2	53	276	667	667	55	276	5.09803947455112	4.34618940731679	-0.102982263022937	0.0213410501049981	69.6308101733958	167.231741586285	3.05273662566606	3.93374283805305	0.286870685011637	0.895837662167085	0.723785402832913	0.921646874371708	3.32453806996577	8.29819777237557	3.05273662427816	0.173674058126032	17.5274336043166	3.26848029132364	2.29840097032831	8.29819849277503	0.531260931097705	21.8093080877756	63.7345128037364	87.3620526576558	246.294236394064	0.160400597951754	36.2891186624833	144.488664695032	39.0667634588161	48.4979587644719	18.7967858945573
Male	Non-Hispanic White	44	10603763	2014001435303	W	N	48	8	'4844'	MF	NA	2	06	277	585	585	48	277	5.18364163188677	4.45725103084779	0.134716114230412	-0.0430268758909088	98.6883736904575	170.82074912897	3.55520083175228	4.93925876147866	0.197228916448644	0.810524292763981	1.09440043350585	1.11807343886762	4.42294929440761	9.66401125858427	3.55520083175228	0.614407889188062	32.8043990505956	3.55520083175228	2.10299261935122	9.66403781747262	0.545008144040228	26.7588744942479	48.5146338798066	116.94720649576	260.278460003841	0.488267271872728	33.9258095885426	173.219561464938	35.4106644331313	59.742492552664	23.1335549373215
Female	Non-Hispanic White	80	11210503	2017000936125	W	N	46	13	'4654'	FM	NA	2	12	278	563	563	46	278	5.10989630253689	4.32931792866843	0.271724190851598	-0.0388074841794973	99.5880442286054	159.347733659793	3.97665980573931	5.1790209342022	0.37839260169784	0.923424454535962	1.17048543838692	1.32395875430296	3.79899225965979	10.800601947345	3.97665980573931	0.752623100344577	26.85089164899	3.97665980573931	2.51738597284197	10.809682072192	0.562640508193046	24.0431389893787	85.0674000695227	114.797571792676	237.533371307814	0.182109053146901	42.9755157344931	168.754458440626	47.2634588453733	64.6774333490764	23.6147352550383
Male	Non-Hispanic White	153	12901001	2014000760843	W	N	80	54	'758026'	FMM	NA	3	29	279	964	964	80	279	5.13843284085031	4.35904734898445	0.198580394361434	0.0746773676687652	95.3570000243406	183.664405382881	3.35073806041717	4.38921702970059	0.216655141778246	0.835071500426989	1.04100681582664	1.02672978520778	8.9677661625885	9.10804061862722	3.35073806041717	0.632810801617887	29.4280263202046	3.35073806041717	1.79146113041621	9.10825038155787	0.39174461720763	27.4585062469695	44.3577132730017	108.853710111537	274.822008778774	0.474483633771081	36.2098766487785	168.290139381955	35.1263606601467	59.3092609086616	23.0214141163835
Male	Other	119	11703526	2017001349142	A	N	31	31	'050721303158'	FFMFMF	40	2	17	280	383	383	31	280	5.15910755191554	4.35744911317698	0.123723085394062	0.0284830892263485	88.3381618759748	179.036669274355	3.05867731219374	4.34279816411105	0.17779964716655	1.04231070059786	0.990552318814054	0.993105424922192	8.11979327871626	8.31434524957731	3.05867731219374	0.41053021370458	28.3127506338367	3.05867731219374	1.91977108852201	8.31434694278587	0.466046182491151	27.8811642613641	43.3891791857405	101.892290645618	269.612022470846	0.390088212376634	32.2628260234682	140.570112317143	31.4292227709067	54.1446835493127	20.6164044056561
Female	Non-Hispanic Black	203	13900802	2015000404293	B	N	12	42	'0713394012'	FMFMF	NA	2	39	281	155	155	12	281	5.07399841125823	4.06993175684715	0.211140548753742	0.0482828184685296	72.3179453830535	167.717535779289	3.46869938561224	5.13553886643693	0.357043487349079	1.04289164559298	1.12903384396156	0.794148711082229	3.2763526559966	7.72142513289147	3.46869938561148	0.518681028966352	14.4376764612029	3.4686993874904	2.2540278291813	9.42890250823328	0.557512670045697	19.8487209018561	74.4374872990474	102.19253319807	246.830639868388	0.172459791561111	40.4748303667235	161.560858638418	42.6925631509877	52.6575850223876	21.4045322215391
Female	Non-Hispanic Black	273	15501000	2015001400310	B	N	52	73	'6652'	MF	NA	2	55	282	629	629	52	282	5.09952136313654	4.4534825565753	-0.254160488591287	0.0448838350712927	66.6411375628673	171.469463988546	2.94687999666684	3.93403486760583	0.250800157634261	0.880342916526323	0.766874736198857	0.859454636584223	4.13270691996852	8.01038191509619	2.94687999666684	0.30909342700612	16.8511677650419	2.94687999666684	1.25398310043821	8.01045034551007	0.364305332349869	21.614133469379	69.1830591956003	88.1846754062674	250.960463116775	0.152704189643865	38.6143678241669	128.513321265877	31.989344527567	43.6155536770851	18.4887592178268
Female	Other Hispanic	263	15104103	2018HU0049612	W	O	7	42	'09400738'	FMFF	15	6	51	283	86	86	7	283	4.81602886378068	3.29419506112964	-0.212240272142712	0.0001977898069344	21.8009770802789	123.498208956656	2.21727791744217	1.66643273371655	0.0831817566398019	0.240704679912397	0.185002247875823	0.294570567579366	0.895907593018874	3.07238985240675	1.13066580940076	0.0394341268505821	2.67699193022136	3.07346832355926	0.677262047030099	3.07346832355926	0.171734709028767	18.2697880835778	18.0113058505075	26.6586450483378	196.205288380368	0.0477832432401356	10.7178867009884	38.8473409666297	10.7417923638999	14.5833037807394	5.54606527953102
Female	Non-Hispanic White	263	15151215	2014000716634	W	N	1	17	'0133340504'	FFMFM	15	3	51	284	18	18	1	284	4.3955597048477	2.38067515406004	-0.0285984593203089	-0.0056725992959632	10.5073676782317	80.6313156387363	1.69398466286751	0.687178059544253	0.0359858023724818	0.0985727748222066	0.0403881826930826	0.112429103032505	0.170397361601605	1.69398470654963	1.45422329466764	0.00687951180819456	0.572107843029194	1.69398470655815	0.193263710836373	1.69398470655815	0.0522470655863914	16.8608290937335	6.895961316278	10.9235712517766	142.509240008219	0.0166618191278387	4.45825268073015	14.4835151834207	4.45697230513227	5.91958342315553	2.22023035460968
Female	Non-Hispanic White	274	14802600	2014000703829	W	N	27	26	'272701'	FMM	15	1	48	285	326	326	27	285	5.1092485105549	4.30766716268069	-0.0887506121318724	0.047936808716139	67.9598133647725	173.674927524064	2.99056492885519	3.7809134520399	0.292000315994104	0.703950391452684	0.536862598587399	0.884777941253026	1.29792743929585	8.11334214116092	2.99056492371948	0.383178385546327	19.8082975907577	2.99056492374793	2.03314151398921	8.12919828135819	0.4817666119534	21.7247410098948	59.8491240153347	89.6652306587414	253.377507230696	0.145632883286656	34.9525506815882	127.52908559939	38.4687011072538	52.5718084658583	18.9435471395821
Male	Non-Hispanic White	11	10400202	2018HU0279009	W	N	50	32	'47121450'	FMFM	12	2	04	286	600	600	50	286	5.17727068269973	4.52984229132755	0.0965865362883001	0.0310421347091852	102.148621633179	182.785405536114	3.49594361261246	4.74789226023253	0.205472785581012	0.920467539249383	1.07041073766899	1.37340851122777	9.07045266105308	9.50295527986452	3.49594361261246	0.671643911900584	31.2427275255493	3.49594361261246	2.67022033202434	9.50295999547765	0.402262040123011	28.2191845614023	50.1864381643008	122.321496803797	273.834964062111	0.476396527008834	36.1838173889204	181.826661824789	39.2727864950487	63.4804079426479	23.9327898380725
Female	Non-Hispanic Black	228	14702501	2015000227200	B	N	2	17	'240225'	FFM	5	2	47	287	33	33	2	287	4.54145264763961	2.63053821244034	-0.103910808929073	0.0347137161619022	12.5112395401012	97.1412751538729	1.29028601824981	0.908787680939999	0.0473013872791817	0.158477657159333	0.0601402267492543	0.146626191447606	0.414134359048623	2.03283899081222	0.935317290189749	0.0221449863996355	1.71349618441335	2.03284156613305	0.201887763122436	2.03284156613305	0.0743662550844938	16.7298207887635	10.9658565279808	14.2528771849932	163.877022454972	0.0232142290928713	6.21301771471693	21.5832428215226	6.01754977561242	8.74578348211293	3.06384734920438
Female	Non-Hispanic White	120	12001500	2018HU0572007	W	N	6	46	'29062807'	FFMF	NA	3	20	288	76	76	6	288	4.76470050211814	3.0917297217862	0.13850164657366	0.0197769486915025	25.285506560413	119.638829573336	2.99115100795254	1.79833240465898	0.098641115186889	0.201783437268591	0.200497809250233	0.318733511166064	1.21578552602462	3.49775576053543	1.28675513643557	0.0690035076116728	2.98606296689748	3.49775585102964	0.67567777388192	3.49775585102964	0.118083915544172	18.6383760734875	19.5997684280522	28.3049467372463	191.588453224499	0.0493861577105026	13.161559958828	41.5466429247579	11.639480379545	16.8094192260124	6.16317287486333
Male	Non-Hispanic White	225	14701400	2017000780053	W	N	25	25	'2524'	MF	126	2	47	289	302	302	25	289	5.18237642850908	4.43350007581962	-0.254961971849738	-0.0319323254719647	65.2703649466567	172.508084672033	2.47052118823678	3.5873274584204	0.135483280747574	0.731251729917012	0.747587151114342	0.53916444587239	3.41375036949586	6.71557099645937	2.47052118823678	0.390491316626812	22.8171861894474	2.47052118823678	1.71201741894838	6.71557277279198	0.304041544328823	25.4196742199326	32.3756599602744	81.9771887032301	262.20432551507	0.317912861644654	27.7159165023092	123.919522223159	25.191482955511	44.6204803504542	16.1945335458079
Male	Non-Hispanic White	189	14201300	2018HU0240402	W	N	64	24	'6364'	FM	NA	3	42	290	774	774	64	290	5.17341828246135	4.465061911396	0.144903678987371	0.0288062397496462	100.48069207481	181.67593484896	3.58077534974602	4.56967602649444	0.189349137720767	1.32478663610893	0.742332370586037	1.0149823946851	7.13524556798372	9.67692469878839	3.58077534974602	0.772284210593293	31.5685011767958	3.58077534974602	2.07764192540149	9.73355656439033	0.441767056853303	27.0611549903394	46.5787085650269	122.23134763648	272.587423430575	0.443537616361873	36.2573104922549	178.426880286663	41.2119309662756	60.8152191945361	24.4018581617746
Male	Mexican American	121	11703209	2016000694987	O	M	81	62	'81'	M	NA	1	17	291	979	979	81	291	5.09915669593502	4.23525332238933	-0.0680126224965951	0.0278995071649009	64.5371288902396	168.520297604747	2.4353217059942	3.15449663059993	0.135215382879375	0.834483780339746	0.855021903204511	0.723629932900402	4.32039957365048	6.59017783927525	2.4353217059942	0.234470957555832	21.5263116770422	3.11870456190238	1.31988289752499	6.61989073334674	0.41155037307466	25.5004531973704	32.2932937161841	82.7768847740341	257.645122338178	0.28675860357242	23.3808469688044	115.975523377421	25.3737909875685	39.8901138108491	15.6862189718424
Female	Non-Hispanic White	238	14203402	2014001231449	W	N	10	17	'38430710'	FMMF	30	1	42	292	128	128	10	292	4.9807830518529	3.70391872117704	0.122973391752841	-0.0213547809835468	45.9196032950942	142.512294170701	2.29665391081492	3.07380392079061	0.194898864513002	0.295352142945309	0.393199550111631	0.693848442332341	2.47825163742937	6.24270406678384	2.29665391081493	0.16950102621048	6.64951210958389	6.24293277704705	1.08523043801582	6.24295259202761	0.310766479793337	18.994132802883	40.8080861116815	61.3890540203729	218.451214227171	0.0923183991778662	27.8730516089503	82.2626658187074	23.2039917418152	34.7941619161164	12.5426708869275
Female	Non-Hispanic White	117	11901000	2018HU0169538	W	N	56	52	'5156'	MF	NA	1	19	293	675	675	56	293	5.09938667549906	4.3073742086091	-0.283082889997361	-0.0589588748007503	55.9406506328575	154.536111543247	2.5391685641308	2.91990631745637	0.237168354751579	0.660522896580402	0.657710997992898	0.526104070077452	3.35667104959999	6.90217565628714	2.5391685641308	0.37915864986168	14.5033253955694	2.53917833699942	1.70682434977274	6.90217576727119	0.356214245678001	21.0310897917905	50.0436747187618	77.5913550578327	232.133435913885	0.123778560925131	30.2309945972009	109.231128300878	29.7768796833394	36.6485739365988	14.7356480789052
Male	Mexican American	262	14805100	2016001213616	W	M	75	9	'7573471415'	MFMFF	NA	2	48	294	904	904	75	294	5.11822552914476	4.37211483722717	0.087863456606371	0.0245316854217667	86.4856318044349	171.187117831733	3.1996388399315	4.35121216622001	0.179201107944988	0.886601145037583	1.11164233140765	0.480907938972506	4.87237291397902	8.68639611949833	3.1996388399315	0.634087298778226	28.080318274171	3.1996388399315	2.24581676662812	8.69752011612029	0.455029294929436	26.0298105914624	44.704931304163	102.914175029923	260.697023059581	0.455848758562247	31.2163749040552	161.745426638622	32.79264497618	47.6122410176809	20.8534080108988
Female	Other	58	10601905	2018HU0069810	A	N	54	17	'5228172754'	MFFMF	NA	1	06	295	649	649	54	295	5.04940433285631	4.09868810098911	0.0881352107380442	0.0451763215759044	65.8133899116482	163.135420163248	2.73184397357882	3.67691280458126	0.266267317452692	0.627160124300633	0.465901568719365	0.940191865310379	4.07520389665806	7.42579774339578	2.73184397357882	0.352212926952627	15.2277846843875	6.74931392201626	1.52667328679855	7.42592182487432	0.408296132750652	23.0911964768728	57.0370618201218	89.6261337678637	241.75552818377	0.150712178694808	34.6274070178091	108.592760738134	33.3911773369614	41.8651211050116	16.5109595687049
Female	Non-Hispanic White	189	14201600	2017000798090	W	N	26	12	'2422232326'	FFFFF	NA	3	42	296	315	315	26	296	5.10969000404623	4.29936920685844	0.26673335337202	0.0764866080573547	96.1685672225116	178.783685130697	3.73525427887979	4.76379350915746	0.399228868677255	1.19432677546818	0.977430816267981	1.10684851772028	6.93306056642799	10.1534731736609	3.73525427887985	0.470851735604386	24.9307138923738	3.73525427887979	2.65843019042114	10.1534738307511	0.602857776515447	24.7461902302814	79.208797737811	117.400183548158	258.947145561581	0.188523923018868	44.3303319322321	153.610688048657	49.7216767646961	62.4788207145004	24.1808358365651
Female	Non-Hispanic Black	192	13902700	2015001472446	B	N	31	9	'33023110'	MFFF	NA	3	39	297	372	372	31	297	5.09445453867013	4.4487494628558	-0.228125213042882	-0.100929127090018	68.075967437929	147.455349040233	2.85638022676822	3.65603263580265	0.246972214845946	0.47678882302708	0.735861869757963	0.772286470019022	5.13491452344356	7.76439991439756	2.85638005730878	0.238948728536652	19.1232709635551	2.85638005730878	1.17216877370467	7.76444600495526	0.425166835918821	22.8329515232888	52.2592184695134	73.3259234687419	224.109678748243	0.134343731944	33.3852443154911	110.139083862112	31.7419508819489	39.4738960797599	16.0035604256589
Female	Non-Hispanic White	11	10400300	2014000371625	W	N	36	86	'38360807'	MFFM	NA	2	04	298	434	434	36	298	5.10577392760614	4.29293483898948	0.00622802886876166	-0.0204109919567963	73.6381230502916	161.638593000895	3.07236206648171	4.17903027501156	0.277257835908794	0.93227934532971	0.448654167629194	0.866930742114605	4.44291213330139	8.35154532701605	3.07236206648171	0.370039798823208	20.2033258453662	3.07236206648171	1.87330529907907	8.35154597070501	0.418428176468409	22.9679183171981	63.0204740766993	88.4721471014642	240.089966218288	0.143530717000289	38.1284615690894	123.411871167295	37.3460452886382	45.3681891002745	18.4410826187986
Female	Non-Hispanic White	218	14700400	2016001011328	W	N	56	66	'56'	F	NA	4	47	299	673	673	56	299	5.0992004500852	4.31683933105139	0.0447534258480376	-0.0412344192030309	78.3818783308542	157.27030783738	3.32773551082192	4.07862151146696	0.303114051082542	0.652259256251229	1.06286377365218	1.03241411573432	6.06922505592908	9.04572293743687	3.32773551082228	0.361167497660658	18.9029429619093	3.32773551082666	1.91207096758427	9.04572296898389	0.345605673324291	22.5541190325834	69.141655523671	91.8276835706811	235.207013237673	0.157918975803046	38.2604685214507	142.130317043365	38.1974530839219	49.96821802063	19.5676682586342
Female	Other	189	14100500	2017000827706	A	N	59	40	'5961'	FM	NA	3	41	300	710	710	59	300	5.07097226472675	4.16842752677504	0.41939288763006	0.0434379093291275	98.2799869043994	166.40260345965	4.13206688287489	4.52748638957202	0.409478409548231	1.27305009655412	0.966436888541963	0.964373226175276	6.06204657740626	11.2321008399227	4.13206688287494	0.604259638628523	22.6482467698448	4.13206688287489	2.25271897891795	11.2321223216929	0.492723716653783	22.7847038032504	84.7461837322578	126.921462052068	245.377819019386	0.202679627065717	46.6215132600798	190.032407741806	52.6091014662581	63.3375028774568	25.3479389940518
Male	Non-Hispanic White	58	10603734	2016000066034	W	N	19	42	'4835771635191851'	FMFFFMFF	5	1	06	301	229	229	19	301	5.18430443974658	4.34567778961952	-0.252754040802435	0.00713735407376459	59.9148117283491	179.727496208947	2.33279848181179	3.20613002769495	0.130442921412664	0.685581546849484	0.61691843270511	0.325277142948941	3.61484150096274	6.33904619116703	2.33279848178394	0.507077800291159	20.6636515862845	2.33279848178394	1.34336089348557	6.3412037224895	0.240934488589363	24.6836637181497	30.540880036563	73.9368377894085	270.391885990586	0.326761686017386	25.8739412431317	121.326777682954	22.1297912671905	42.6394900774719	15.7692445281384
Male	Non-Hispanic White	223	14203106	2017000329188	W	N	37	33	'3537'	FM	NA	1	42	302	455	455	37	302	5.18540829473203	4.52146861241116	-0.187510720771385	-0.0329459724859687	76.2454614416873	172.856595369412	2.80681271049129	3.76688637467363	0.1570076843903	1.16861229018169	1.06502587529369	0.896397522566562	4.50106850300083	7.62918132859901	2.80681271049129	0.316808419768637	25.8498053142235	2.80681271049129	1.73977277841052	7.62970798681548	0.239620198083571	26.1644278781756	34.5211154380215	90.9630558443542	262.601515400147	0.382553968186781	26.6404341769642	146.437553190934	30.0480154516605	46.952713456266	18.4268317804852
Female	Non-Hispanic White	187	13603203	2018HU0736629	W	N	26	25	'5923632026'	FFMFF	70	1	36	303	322	322	26	303	5.11456054155429	4.30788783268491	-0.143867601464864	0.00339374815832661	64.3296234002319	166.993399838838	2.6536786861848	3.39356285366528	0.247124942898727	0.516381022297101	0.597558247770884	0.615102548545072	2.3778460234289	7.18542408836908	2.6536786861848	0.380268057829078	17.6620802797085	5.88910639427711	1.88446834060662	7.21344655122514	0.382840917203907	23.2416776888383	53.119247571005	81.0229735214736	246.030922164907	0.122748768742063	30.8730453228516	105.59316789128	32.5727626713079	41.2303569443212	16.3221753572851
Female	Non-Hispanic White	192	14200900	2018HU0137333	W	N	27	19	'08512827'	MFMF	NA	3	42	304	334	334	27	304	5.09473335354032	4.29959269046905	-0.0207209119971213	-0.00884131444840312	72.1589827472697	161.724139166294	3.05307282409095	4.07465728934595	0.278072322783834	0.64351397068651	0.790375731306319	0.942954069384435	3.96933951890706	8.29739144388696	3.05307282409098	0.445124451944166	20.0020340612292	3.05307282409095	1.50317859381803	8.29911237852942	0.346526044815522	22.634871129795	62.0952515420714	84.6545979507747	240.185259445269	0.134445188044495	40.0699695540423	124.831550126217	39.9598454217587	45.5004844767939	18.3325772089896
Female	Non-Hispanic White	192	13904108	2017001375916	W	N	31	17	'123331'	MMF	NA	2	39	305	373	373	31	305	5.12014382949403	4.31551562629258	0.0340989121547375	0.0443973798919429	77.4486037118016	174.957171447599	3.17403602840537	4.4490513110901	0.305772972670371	0.956535844393363	0.211327048056723	0.684226810473116	5.75795717953827	8.62785869856598	3.17403602840537	0.424306738788165	21.0614140252891	3.17403602840537	1.60603443064571	8.62792445888801	0.486291128826738	23.4006693744783	65.1474492446153	94.6809565545454	254.779233104059	0.170359880694041	36.1466864639017	143.814050239671	39.0060017010508	53.5096900369931	20.2169616290443
Female	Non-Hispanic White	153	13200408	2017000916610	W	N	44	60	'474481'	FFF	NA	2	32	306	530	530	44	306	5.10857240614355	4.29877213171768	0.123480020538451	-0.00181622176226996	83.2836417432501	165.133821467219	3.38707036395915	4.27976778438258	0.301790420374306	1.12919302996616	1.00618157195531	0.922765693741757	5.44225780171415	9.20678796419392	3.38707036395915	0.295122000520432	22.2852284127572	3.38707036395915	1.87760720373703	9.20701177323023	0.523531557536159	23.5886954783838	77.4439369674323	102.48672934772	243.973264822818	0.187502555187642	41.0552689812921	145.944794689119	38.002276303133	58.8534923146316	20.6588653719931
Male	Mexican American	264	15159308	2015001195704	W	M	39	12	'03003931'	FMMF	35	4	51	307	478	478	39	307	5.14450730600506	4.50345932230583	0.162974677747177	-0.0203499758716273	106.317935886133	168.03248606317	3.74861261180562	5.21456395317606	0.204688924070386	1.27725058036583	1.26764559087435	1.09014739455109	6.198524203993	10.1830974980753	3.74861261180562	0.296358283670016	33.8607224964554	3.74861261180562	2.20546680733309	10.1897855445998	0.603630661523266	27.3619426428068	49.2115623924074	114.871745829641	257.085570474686	0.518528329495673	38.0964308138094	180.963555302355	37.6868173616439	59.9914323855174	24.0928552948663
Male	Non-Hispanic Black	115	11600800	2017000768249	B	N	33	20	'3033'	FM	15	0	16	308	396	396	33	308	5.18558693876448	4.46185752570271	0.20691431131495	0.00429713319160054	106.566780652562	179.447748699466	3.64302644513305	5.1151153053627	0.207145544572866	1.45368838998561	1.02734893455043	1.43919238333251	7.72134223287938	9.90151279932943	3.64302644513305	0.63371169473377	33.7449776092825	3.64302644513305	2.07679849160559	9.90277241908852	0.524465863077925	28.2522665584632	50.1061270531944	112.850310806328	270.07617393379	0.515055340956013	39.7729190043061	191.177311963975	39.891485140788	64.737771994654	24.5973660960288
Female	Non-Hispanic White	129	11802700	2018HU0254286	W	N	51	19	'5156'	FM	40	1	18	309	616	616	51	309	5.09806297001827	4.2854325061848	-0.169722777550216	-0.00251492574110408	61.2957021436173	163.293312071267	2.65528382344535	3.41905041565546	0.253458330978923	0.527304021971817	0.988159609921172	0.688928808774022	5.03200895093204	7.2178096858512	2.65528382346586	0.362006940703821	15.3204853370986	2.82849073438568	1.40662283159247	7.21780976436916	0.418113382618398	22.0844257033385	58.1379252218925	79.1951704736759	241.930995712831	0.12240285914084	29.7075740463243	106.63339808423	34.0153415569691	44.20519787518	16.0598864826565
Male	Non-Hispanic White	192	14100600	2015000678821	W	N	13	10	'13546028'	MFMM	NA	2	41	310	164	164	13	310	5.10341548646241	4.05271806113451	0.216015273599698	-0.00528951866764168	71.4310989995285	163.714812805621	3.32953873444171	4.50295269576136	0.191313742737951	0.99978260381563	0.864854275017678	1.14828892121996	3.95464449547339	6.78941331657099	3.32953873444175	0.366873870226088	16.3079809947758	3.57985124371758	2.05232131781517	9.05062463888641	0.455447964939492	20.4537522151715	40.4767669219293	106.544709179879	252.115033820219	0.427374010949269	32.2073404740267	158.527702407676	32.1172272518297	50.0467176674709	20.9856692659876
Male	Mexican American	120	11900700	2017001254687	W	M	17	53	'171551101347'	MFMFMF	35	2	19	311	205	205	17	311	5.14195595384697	4.30534532658021	0.27342815448496	0.0180900592462299	97.3948642739884	174.172469634813	3.57308021777057	5.18500305427846	0.192513346147909	1.09212188935223	0.745622994964221	1.10988024576308	5.94868672733813	9.66885655671094	3.57308021777057	0.608845902731202	29.1532372174437	3.57308021777057	2.58979239951777	9.71263901078064	0.73935990393551	26.2579562556695	46.055071171531	108.618119867011	264.099387668716	0.461693799626893	37.2305156371797	177.392644697338	38.6320425102707	61.4460831802066	23.5912074401102
Female	Non-Hispanic Black	116	11703700	2014001278785	B	N	47	23	'534718'	MFM	NA	2	17	312	574	574	47	312	5.09912986949854	4.4534127929906	-0.228955948901826	-0.0366160073156383	68.3373756168189	157.987175527132	2.82987244546574	3.75314657439074	0.242697288943308	0.615181709471499	0.747277436528358	0.815734135935555	5.03279004238818	7.69223572518622	2.82987244546569	0.329221635152801	18.7265283826792	2.83084359279245	1.95419108581219	7.6923908451558	0.326375182072209	23.1485709811112	52.7044501057336	73.3681352635788	236.010644363311	0.139342827333205	32.2150525117653	116.100043029701	31.4331875645937	43.7747075790485	16.6970004830084
Female	Non-Hispanic White	187	13600200	2016001460564	W	N	51	19	'195149'	MFM	35	3	36	313	622	622	51	313	5.09862840594759	4.2853591170153	0.212230138066803	0.0160380093643158	89.8003843245232	166.445248135196	3.82179994591556	4.95874264050121	0.356393540974733	1.48795815083537	1.14559649450143	1.07826528123541	3.89764141487001	10.3886282068776	3.82179994585381	0.475294742263108	21.6839413959488	3.82179994585381	1.95655224072761	10.3887293287137	0.565083217988933	22.4968825152519	80.2610427434599	121.635884404202	245.424980491419	0.188322246532784	43.8472112254974	176.213123595095	43.5497663979957	61.6938262810456	23.4491294288319
Male	Non-Hispanic Black	184	13600500	2015000414138	B	N	8	68	'3308'	FM	NA	1	36	314	97	97	8	314	4.87275501368413	3.41206980852589	-0.0653241823383988	0.0291132649259911	28.4101258657097	134.540904920787	1.50188136785989	2.11946228097722	0.0680192997056452	0.424773934163292	0.0998304024830574	0.461794680497225	1.74679886136085	3.93742161966884	1.45632051349635	0.0756172208059927	4.19396319852447	3.95868958824928	0.779511593806861	3.95868958824928	0.226432169958462	18.5081482937367	14.9876880149239	38.0960269065099	217.607329957228	0.154611025709786	12.0666813340679	58.6988454344335	12.2329260034709	22.187209232777	7.92265046259702
Male	Non-Hispanic White	10	10101000	2015000669686	W	N	60	20	'57042360'	FFFM	NA	0	01	315	725	725	60	315	5.18032829068254	4.54851050158943	0.534802148640158	-0.0174861515928339	160	174.660159308179	5.13834409979905	7.13943970773792	0.290383821691728	1.00523981715338	1.63951924389745	1.78010152811559	11.3193199166327	13.9674650643718	5.13834409979905	0.69241162851759	45.2704071376839	5.13834409979905	3.02134239944747	13.9674673947811	0.713178310284448	30.1384362145496	68.4338667684654	145.969446436649	264.653810176366	0.68237939072794	56.2923177202335	239.614373017786	54.6124956309298	81.6973543947051	33.9970586002266
Female	Non-Hispanic White	82	11201110	2016001516423	W	N	37	63	'161837'	FFF	5	2	12	316	446	446	37	316	5.11009978949562	4.31384235064339	-0.126211380105026	0.0293720246191325	65.8665661471427	170.625622471085	2.83232212775635	3.79938010448978	0.276626703962731	0.790088973200626	0.830768963608651	0.777882593989455	2.94962416880392	7.6955959959455	2.83232212775635	0.333147093394769	18.567748163287	2.83232212775635	1.66173514788711	7.69904977222243	0.387529314764999	22.2553230798361	51.6115666333463	87.0101751595916	250.033615592188	0.143667632111166	32.7980776457227	116.182192529953	34.6433959143129	49.5777492699874	17.704393553117
Male	Non-Hispanic White	261	15311615	2018HU0697092	W	N	87	23	'8487'	FM	15	2	53	317	1050	1050	87	317	5.04039247703883	3.99930355269855	0.0932076783227941	0.0101323389307181	59.8901008994612	156.104369057899	2.34163399945726	3.06218856809648	0.123969127312007	0.616302353950433	0.918204842042536	0.780938821607023	2.59648613455913	6.36440011899415	2.3416339940383	0.311356018508236	20.6395734432729	2.86794876724032	1.23582807320264	6.36522113486811	0.391468788162964	24.5762006581468	29.4575890024143	67.1736300829087	243.273081100873	0.301675298362076	20.6934896252279	103.843959416084	22.9486667600979	38.5178930047692	14.241412913506
Female	Mexican American	229	14203602	2014001077855	O	M	56	88	'56'	F	NA	1	42	318	677	677	56	318	5.04204749247658	4.40075263408857	-0.0325923181348215	-0.00513828418562744	78.8983500684928	153.9933174501	3.32737673501982	4.00587531861344	0.294658288144294	0.359599179531267	1.17730073215616	0.910606888434036	6.63161149519455	9.04472166630043	3.32737673672253	0.535316815815432	18.729497269077	3.32737673501982	2.06051806311577	9.04474770372023	0.455736587488593	22.7118776596912	64.4498399237795	89.7618935855977	231.52165628628	0.15020621934338	38.4350070291173	132.849163869248	39.1507922111369	50.9474036830373	19.2589943195056
Female	Non-Hispanic White	11	10400106	2016000269118	W	N	30	30	'303101'	FMM	NA	2	04	319	364	364	30	319	5.11348351216674	4.31245220586806	-0.222280674463156	-0.0113414000165783	59.7501398506122	164.37363720838	2.57583988048613	3.72457354404969	0.257088272883715	0.813626988618773	0.487779386971655	0.64572299585017	2.89781085293957	7.00180702074639	2.57583988048613	0.31335255545282	16.9454309529988	2.57621789266901	1.80955348174541	7.00185874001139	0.314178248900402	22.196371910872	57.322407115018	72.0610442799323	243.130441282411	0.122477380746072	32.8164515096631	103.080250215182	30.4808910992776	43.6702559916377	15.6566271703856
Male	Other Hispanic	212	13604111	2014000109403	W	O	61	80	'616124'	MFF	20	3	36	320	736	736	61	320	5.12595659603319	4.38298325850482	-0.223886945760947	0.0271923725555999	64.0136481356289	172.975327477257	2.42200977576831	3.13885552894455	0.12886385274264	0.732686277746575	0.676693671874837	0.806163098730472	4.89094861437266	6.52344534982898	2.42200977576831	0.466299843296685	21.3602263129354	2.42200977576831	1.45737432423777	6.58370516173071	0.273387962447014	25.4299710001411	29.8636772026711	77.1231170655951	262.736786005915	0.311548545740578	25.1834987724297	126.105806692694	27.1511819882094	39.5092853382385	15.9087766040068
Female	Non-Hispanic Black	183	13904105	2014000772503	B	N	64	42	'64'	F	NA	4	39	321	769	769	64	321	5.08332609641179	4.40688367946914	-0.0448357295284651	-0.0317154489840256	78.4175653380528	156.273964151768	3.42925781597434	4.26848050804514	0.297361479595474	0.748382099107343	0.768062101060941	0.983790424146857	4.35794549208091	9.32135703344912	3.42925781694077	0.658682188865456	18.9412332598808	3.42925781597434	1.91281369082972	9.32168920626384	0.481776294139233	21.8672119584489	64.5182627100081	92.0847664038058	234.088557864842	0.149824033027643	39.7437024301851	147.695464796135	38.0749276351034	56.6049175021274	20.0687504172042
Male	Other Hispanic	188	13701203	2018HU0129327	W	O	94	24	'7294'	FM	90	2	37	322	1134	1134	94	322	5.35341337705744	3.9944682445884	-0.152918310256233	-0.0605067833211124	46.5976417828177	198.920767810759	1.64956944025424	2.09714242028536	0.110246846856318	0.67677768587268	0.726311116377818	0.569066910365832	4.33223119169598	4.48232804656486	1.64956944025424	0.248898577017431	14.2698958795469	4.48376146705207	1.10868497029851	4.48399290623916	0.446891287849747	27.2483662983157	23.2499327548115	54.6434389535078	291.771492572182	0.242741460111558	18.2697976762037	92.3405702927955	17.9194470516005	30.9374022345761	12.0324334421109
Male	Non-Hispanic White	149	12701406	2017000531608	W	N	38	16	'381411'	MMM	NA	3	27	323	463	463	38	323	5.18102199218024	4.49243855608893	-0.235823517090582	-0.108300677155791	70.5706996334326	159.608080753958	2.61709948455617	3.79993906457045	0.140943164489166	0.81838102968068	0.441763646423357	0.649607595327663	4.1691999857248	7.11200637124237	2.61709948455617	0.536367109236131	24.2484189384083	2.63513513422845	2.02939822638257	7.11401397208712	0.343771485097996	25.9652338590409	32.7707262247869	74.9256102785777	247.356836728931	0.30036525557845	25.6178160086851	113.219887628141	23.7103741125546	40.2643330325401	16.1839362476183
Female	Non-Hispanic White	94	10800820	2014000914604	W	N	1	71	'323101'	MFF	NA	0	08	324	12	12	1	324	4.30296969588452	2.20772093033789	0.111392222591611	0.0795242857109382	10.1666540395144	80.0373964916128	1.69684020343431	0.662839275993084	0.035497991071498	0.0731884075674713	0.0463218609815435	0.122552646995076	0.308263500472837	1.69691022534689	1.07642020774641	0.00628518523410787	0.484858688045602	1.69691023346155	0.204927220333829	1.69691023346155	0.0596370632587395	16.2859710471938	7.90179170929164	10.8973424654243	141.721235350989	0.0193225839934421	3.91685367894296	15.9366508298258	4.67837710249424	6.06079161235755	2.21176674957059
Male	Non-Hispanic White	227	14701000	2014001110726	W	N	53	36	'2108175355'	MMMMF	30	2	47	325	640	640	53	325	5.18381018856948	4.51981155308947	0.126860913531334	-0.089644185625748	104.237553912451	163.06778984093	3.74107681324693	4.62143709395443	0.205879333957853	1.44536532975227	1.18946126346388	1.16608817722617	6.12004109634993	10.1689841974707	3.74107681324693	0.479116464906713	32.9159476016228	3.74107681324693	2.26878567714745	10.1693011203086	0.194686590764497	26.8629814665532	46.4545590937497	111.191694606585	251.367369636996	0.455875765232013	36.8723541524853	187.037168463261	36.1108044892516	53.1235644311857	23.5096159538959
Male	Non-Hispanic White	9	10400800	2018HU0661933	W	N	57	21	'775778'	FMM	30	3	04	326	692	692	57	326	5.17748708297307	4.49207934128022	-0.0793046748120315	0.00889734480729705	82.4980508060502	178.820843044084	3.02917123418182	4.20644038153905	0.171760670338144	1.2424535692582	1.16666800647114	0.923725885884341	4.14076046523767	8.23413754934532	3.02917123418182	0.39803334441706	27.304400086509	3.02917123418182	1.98695079805304	8.23414097529647	0.626560185218873	26.2345286641852	40.6107629234787	96.70393026378	269.368225546191	0.443360365411767	32.2773086843687	146.131277519763	32.3241461724537	55.2612726612202	20.399062005678
Male	Mexican American	80	11209300	2016000150994	O	M	81	79	'8170'	MF	NA	2	12	327	980	980	81	327	5.09803643694513	4.23233730392311	-0.0287700936317796	-0.0514148908104863	66.9246400036909	155.496239202617	2.55868146745783	3.55781282430941	0.126118978509247	0.835352793557787	0.744023278524933	0.767959289707404	4.16312115964174	6.92546201738716	2.55868146415144	0.232896561362695	22.7020566453852	2.55868146415144	1.36251274993836	6.95521732881724	0.269155230631963	25.1559091826561	26.8722435904531	78.1836194644922	242.561952147481	0.294860882323374	25.212999374589	121.469067824189	27.6092514243986	39.9284264294867	15.5159692717037
Female	Mexican American	276	15310901	2017000634099	W	M	12	36	'124138140810'	FMFFFM	20	4	53	328	146	146	12	328	5.02661597990625	3.93660030041628	-0.0998543873389981	0.00718067775566109	46.3743225658897	153.514750621106	2.1839459972665	3.00972676907376	0.195871631981246	0.403322434262663	0.487453158107052	0.518135527301319	1.72402441504376	5.92970176260466	2.18394599726651	0.223895358263779	9.13336716349709	5.9365807185712	1.2903464606687	5.93658071870484	0.273364695249761	20.2341892253416	42.5215370380856	56.0844450290538	230.981819474777	0.102832374013031	27.5799454001742	83.9082674695096	27.1728665115056	32.1265305474184	12.6112955020818
Female	Non-Hispanic White	116	11800300	2018HU0956103	W	N	65	14	'6573'	FM	NA	2	18	329	787	787	65	329	5.08672832276536	4.31829187683554	-0.208213090313363	0.0775914159538646	60.9515195387001	174.91842785663	2.76356285685089	3.35601155666983	0.284925206696722	0.623278955139011	1.07133925795781	0.848845776781915	3.00458913072315	7.51213490472901	2.76356285711737	0.660957699022175	15.1071637923904	2.76356300354855	1.58335754082462	7.51214269558203	0.415683740924432	21.0554127754326	61.540302138048	86.3788607883335	254.736917023599	0.138103158482707	34.949341989121	126.096604660369	37.1463211796258	47.1195267738261	17.5995370538781
Female	Non-Hispanic White	199	13603102	2018HU0652703	W	N	53	69	'2853'	FF	15	2	36	330	647	647	53	330	5.09667395155638	4.33136642921784	0.350235278255816	0.0262420193339161	107.942827016184	167.824026796636	4.43731570047692	5.36779305312264	0.434710919929552	1.25430817046665	1.42425481658278	1.13511813611646	4.95868928176017	12.0618677332666	4.43731570052256	0.41379690634371	25.2119988492645	4.43731570047692	2.85010810652712	12.0618745926021	0.507152797828309	23.3261544371483	89.1091331191732	124.530287231372	246.948173018	0.216740659954504	52.3967979395449	195.600295141692	55.811229786392	73.0357626957451	27.3946751334215
Female	Non-Hispanic Black	155	12601004	2014001391349	B	N	11	9	'11433912'	FMFM	NA	0	26	331	136	136	11	331	5.02778703819262	3.90840169354089	0.11661948342761	0.0714281428537296	55.9814942874323	163.893230298919	2.76241459075642	3.42747043711759	0.280547454345802	0.604905787876287	0.799373452862214	0.807214495797469	4.5016031163368	7.13928143906449	2.76241459075642	0.371591316718593	9.42854658861856	3.95388982688094	1.19076381365849	7.50902137786174	0.41176886632244	19.2654208657735	53.9912982026108	78.1005197753603	242.597307125954	0.131037245451308	33.6413421011741	108.642328751979	30.0983124689318	42.783949970556	16.7538585220738
Female	Non-Hispanic White	139	11700104	2016001101802	W	N	69	10	'697119'	FMF	NA	2	17	332	828	828	69	332	5.07411723444353	4.25757145763195	0.00116915499604767	0.0529663375636138	70.7208623860558	168.524909884254	3.1706490418458	3.61677119283457	0.314808082728337	0.714155005144331	1.05585001686244	0.693183197338449	4.52717259606713	8.61871436859131	3.17064886678086	0.362626060904705	16.7733266340918	3.17064886678086	1.78417078129971	8.6187171989943	0.419913566451011	21.3048547339959	63.6601059872967	93.7257415006182	247.72126672966	0.156645549494447	40.1220139276578	136.675127241578	40.5310637500822	50.8267705745851	19.6359288408479
Male	Other	227	14500102	2014001497745	N	N	9	23	'093506340402'	MMMFMF	NA	2	45	333	108	108	9	333	4.88641128955593	3.40934342054836	-0.189363655631937	-0.0363251763442753	25.0276137403581	127.751390454899	1.42259678363007	1.85538910632498	0.0569995331883347	0.409092438332836	0.185971051477677	0.274990234362779	0.665271856126421	3.66883455047874	1.34968908210095	0.0825681241171506	4.05223825793049	3.6688352660554	0.625001725382585	3.66883526605533	0.103901781404517	17.5431897397112	14.8785970530514	36.1922592936007	209.318198668234	0.157025644906122	11.0351814321401	51.7172773733181	11.5855578022156	18.2035407780097	7.06286210889831
Female	Non-Hispanic White	223	14203503	2016001191374	W	N	24	13	'22552459'	FFFM	NA	2	42	334	298	298	24	334	5.10280691374274	4.27523724189379	-0.016117377678573	0.0115419590000228	70.7476884719614	166.392403074204	2.91231114786349	3.78449153794655	0.279448215317947	0.514807745632792	0.990072896211187	0.814681664857222	5.22664429594815	7.9164762696346	2.91230953454707	0.355711770779097	19.2913923612662	2.97450841308159	1.78724304626414	7.91647808651056	0.474961070402877	23.2926404740711	61.7045004539814	89.2659667018457	245.366537791835	0.151953163464018	35.0237282247931	127.408895859402	35.8567594105562	50.1164839994067	17.8645826867491
Female	Other Hispanic	200	13603902	2016000016831	W	O	26	22	'58242726'	MFMF	40	1	36	335	314	314	26	335	5.06881720509655	4.22166133156512	-0.304907895014452	-2.99614450907648e-06	50.2370818637416	158.985691714193	1.99697660157997	2.93360883282018	0.18540750928072	0.384939861629633	0.518886317836955	0.608321598343451	3.35037407944106	5.42669158444056	1.99697660157986	0.203761710506516	13.2370161852437	5.42834520793243	1.57003371347799	5.42834520701355	0.255273231398459	24.1565700990175	37.1372601600526	55.8929999960737	237.128495026434	0.0994957205372906	22.4576736863441	80.9865618408602	24.5669778494085	29.8655287325049	11.8385014033909
Female	Mexican American	283	14801901	2014000919830	W	M	65	53	'6565'	FM	NA	1	48	336	789	789	65	336	5.03198306943038	4.26921973072741	-0.411187784490049	0.00111693909434357	47.3720288674687	153.407841945783	2.0317046237995	2.59518715661809	0.182380472271867	0.598483291736248	0.451986492801463	0.60092134558083	3.26448042640469	5.51729340344086	2.0297025475657	0.271340943099629	11.1345591890056	5.49678679332837	0.933808140943993	5.51730355222215	0.197284940260066	22.3393946931858	40.3237650679614	56.8405886332895	230.861166033508	0.0974698753276081	24.9142058057473	82.9801535689191	23.3073977504681	30.9680736132259	11.714487420805
Female	Non-Hispanic White	264	15159303	2014001263890	W	N	17	25	'13175355'	FFMF	NA	2	51	337	208	208	17	337	5.09933266322021	4.14507586188724	-0.052024276513369	0.0720598760178487	59.9224715211712	176.159976441013	2.62226404506705	3.46835325410558	0.257729653732948	0.562556816287637	0.904990076988372	0.942882315861347	3.7750240587128	6.07598253614308	2.62226404499848	0.25591071424144	16.8221341903101	2.62226404499848	1.49969096372196	7.12805264553267	0.35487861525325	21.8514255211804	52.8210665038667	75.3053393579875	256.091784912104	0.131916062542917	33.2026178780661	118.758188779512	34.708996219394	44.2454288872447	16.7885069948624
Female	Non-Hispanic White	227	14700300	2014001117137	W	N	66	4	'0889663089'	MMFFF	NA	2	47	338	797	797	66	338	5.08912262738742	4.32106810061423	0.203573338814628	0.00356398569068873	92.2628380811141	162.82672736189	3.85738582603949	4.62636195952276	0.370796319792587	0.896218739483022	1.04165577905402	1.39396876304051	6.41618650489059	10.4854616592092	3.85738582603949	0.639735782365576	20.6888477756193	3.85738582603949	2.46325606681911	10.4854617962774	0.598355528321665	22.9184883861731	75.5826165194937	106.827390966186	241.412350762592	0.183248509022183	47.1695812882461	163.390760770624	45.7137787924091	61.3002230830583	23.2805145015623
Male	Mexican American	111	11901300	2016001248439	W	M	39	61	'39'	M	25	4	19	339	469	469	39	339	5.14240883965308	4.50628998840284	-0.0211025767909376	-0.00614527228364847	88.6935714606532	170.079090546538	3.15385604563305	4.49308952128615	0.177240883553818	1.05817752618926	0.781662174971474	1.30805799225275	5.71961639392093	8.573067617895	3.15385604563305	0.37014392702649	29.289742521425	3.15385604563305	2.07747934745234	8.57306957841996	0.509642235409378	27.1222637233116	34.0387906660902	96.5484913766735	259.430453938152	0.405346489193532	30.746782325861	146.347091836583	31.35613603715	51.5502807223414	20.4551576393542
Male	Non-Hispanic Black	275	14806200	2017001381460	B	N	7	29	'108235070759'	FFFMMF	NA	1	48	340	92	92	7	340	4.85440152583634	3.35945407059162	-0.602561538301721	-0.0639203255796194	15.7508216519689	120.359271643047	0.945600623252445	1.33062947605492	0.0379673893220281	0.254231768403717	0.0595742308457606	0.220343990488755	0.596126522291552	2.4947085633337	0.917751992210895	0.0262551915241204	2.57875101494972	2.49470856345083	0.480418305413418	2.49470856345083	0.139644103325904	17.162394400339	9.7732884699258	21.0356356538951	200.166974575814	0.0923333897990202	7.8221135943791	38.6957656063301	7.52116739599331	12.3200914433408	4.59259099227955
Male	Other	91	10804105	2014001473986	N	N	42	40	'4233'	MF	NA	1	08	341	514	514	42	341	5.15815365940926	4.41196986710677	0.0720299479058737	-0.0231391708835604	88.5883017981302	169.866780976076	3.20991897068682	4.44114152994862	0.17667881360895	0.783605425293966	1.24687114170623	0.733490676095189	4.44552468502973	8.67925406738685	3.20991897068682	0.519532279011583	29.9550007297688	3.20991897068682	2.20566939146741	8.7254644088431	0.47141305265341	26.5982984639563	39.8711272162639	100.547488914426	259.187530923593	0.446506375156387	30.3722201901627	157.472751718354	31.4515014035307	59.6636780527807	20.7992743119279
Female	Non-Hispanic White	156	12900902	2016000073626	W	N	21	13	'46161621'	FFFF	6	5	29	342	259	259	21	342	5.10671386855643	4.19476769962438	-0.171225672166165	-0.0557174133378851	55.8987504978765	156.178011370223	2.29849402794233	3.1354299704153	0.198455110209774	0.383522708355137	0.894049344278697	0.674647096869405	2.003639973036	6.24052852115407	2.29849402794233	0.199997755600897	15.0154189846524	6.24795454896134	1.43308609212521	6.24795454897727	0.289885382540008	23.3197284040448	47.1012929329813	61.0957757698407	233.980751170628	0.107007177364651	26.490437520333	94.6975772970016	27.6986308479799	36.3945701500595	13.4450839804788
Female	Non-Hispanic White	255	15500800	2018HU0979855	W	N	55	16	'55'	F	30	4	55	343	669	669	55	343	5.09848631044294	4.33686677190287	-0.11487282759799	-0.0103872205372187	68.1692746021305	162.081466734255	3.01279004451107	3.46851241676874	0.295730626548934	0.978477316562433	0.687356888317177	0.976135071086149	3.58366195166884	8.18947287407798	3.01279004451138	0.375140325548448	16.7915152404876	3.90192694260793	1.64314374024365	8.18961243095676	0.397372186168772	21.6266263480014	59.2576393755055	84.2051930502497	240.583164482394	0.144520211197306	35.9450825495101	123.952411220656	35.348293361151	46.343793638967	18.1206640707381
Female	Non-Hispanic Black	203	13604111	2016000675855	B	N	7	52	'1107480038'	FFMFF	5	1	36	344	89	89	7	344	4.83349990505703	3.33683206534918	-0.131858005276987	-0.0312596664509933	24.6548604628608	121.782934985198	1.40720691048794	1.79270282061496	0.0972451415764752	0.353229933344398	0.190836416054994	0.290539035382618	1.40248435268897	3.65110318337769	1.34317593903873	0.0648706580561193	3.1566567450747	3.65113032162329	0.550287827070087	3.65113032162329	0.15211100408656	17.3552516776182	22.7171458538531	31.9361208784424	194.157889131499	0.0479655112088536	13.1489340228149	42.596721751491	13.2386850066302	17.4939459100939	6.51970436590318
Female	Non-Hispanic White	191	13703103	2018HU0475654	W	N	39	53	'0539141625'	MFMFM	20	2	37	345	474	474	39	345	5.10298057634125	4.31070908743295	-0.0130895994037391	-0.00375833958325922	73.524559115214	163.89438668637	3.09157430588236	4.03028990985335	0.27528970933384	0.661515495513952	0.927870405668662	0.653866612562793	4.77213896569441	8.40377000796832	3.09157430588384	0.339120339895309	20.0282879755867	3.09157484723951	1.62222100719755	8.4037702570109	0.356708686879609	22.7822390279665	67.8164152525316	89.1116007474708	242.598590901832	0.155570620027936	37.8273927616047	119.853566660349	35.8449110198124	47.9107702115596	18.7502892568843
Female	Non-Hispanic White	263	15151115	2017000250111	W	N	8	16	'3612353208'	MMFMF	20	2	51	346	98	98	8	346	4.86039674882819	3.35800716284939	-0.223275243852674	0.0127003782426173	22.9824738514674	130.725163013733	1.26594848975026	1.70008700029307	0.106370552048864	0.362353218923185	0.181831125797553	0.31044979184882	0.845497406986255	3.44106309735199	1.26594846330715	0.0842312289494351	3.05141081395688	3.4412046531469	0.692465399778268	3.44120465314682	0.150107248416718	17.1473180475694	22.1311801728973	30.5039957691647	204.755043704826	0.0532309122194615	13.3490855714914	43.2737779971041	12.899185313795	16.852202336873	6.48023322835304
Female	Non-Hispanic White	192	13904110	2017001372821	W	N	4	16	'07260430'	FFFF	NA	2	39	347	50	50	4	347	4.64024133335309	2.83882797638946	-0.147608290164708	-0.016062762644135	14.7496549047611	101.919019420687	2.21771628018652	1.11981415787934	0.0535438820370769	0.178654206489429	0.0584780988371357	0.164053409097098	0.559560422994646	2.21771209517478	0.860669974217753	0.0222214141198762	1.83082036453686	2.21771628028691	0.377872928585963	2.21771628028691	0.0875287871431012	18.0788314808543	11.0773137288482	16.2794071802723	169.885628759961	0.0293733970948703	7.05381945409539	23.1798188427455	7.21854539631001	9.49383681174441	3.46503920917319
Female	Non-Hispanic White	43	10603729	2018HU0082511	W	N	24	20	'2624'	MF	NA	1	06	348	291	291	24	348	5.10056688756637	4.27031697913061	-0.477041629226539	-0.0446577759784064	44.4015931212662	156.947147977599	1.82323669426639	2.23052418330624	0.156218498241325	0.329135547137608	0.681835190175724	0.569212349004062	2.59080358900289	4.95606827435897	1.82323669426397	0.221441022912413	12.255281384409	4.95607117407142	0.945591283522045	4.95607117499746	0.278762515792816	23.3531699756553	36.1636536090705	54.4461761022701	234.844441594563	0.0921172368069006	21.0711205713481	72.3374490775436	19.8898119054002	25.5662876010114	10.7044250839785
Female	Non-Hispanic White	117	12001301	2014000866012	W	N	65	28	'5565'	MF	NA	3	20	349	782	782	65	349	5.08637301485907	4.31400748159777	-0.325046679179182	-0.0081319498544958	53.9987448307208	160.491513375116	2.33320797436458	2.68618950025615	0.222454478805689	0.803916118521052	0.497808658560489	0.63912767838392	2.43963880396782	6.34226626654672	2.33318945386631	0.228745387785044	12.6460186661953	6.34226649377309	1.51750286554419	6.34226649479683	0.369459343317685	22.1437463174025	45.9365515460058	71.0809477677521	238.810967820213	0.114233087902807	26.1999854269666	89.3833224726503	27.2022298156583	35.4846076296177	13.9297807896432
Male	Other Hispanic	58	10603701	2017000394264	W	O	52	34	'52521418'	MFMF	8	1	06	350	634	634	52	350	5.1417699326553	4.43961479362421	-0.032547117733906	0.0300566802831394	82.0285761254175	176.236459452276	3.11905181666101	4.30951567396982	0.17604259856271	0.996066195917797	0.551392475559744	0.844186812888797	3.64996279438896	8.47840777421874	3.11905181666101	0.280030731114582	27.5025160380314	3.11905181666101	1.93775822127604	8.47846113239305	0.323013579493079	25.2992027536209	39.3667593749678	107.734512788157	266.443163482457	0.453273208292617	34.4745267764181	159.609398439085	31.603838950483	57.4025796238885	20.7762508274216
Male	Mexican American	259	14802400	2015000270485	W	M	62	55	'6257'	MF	NA	1	48	351	746	746	62	351	5.12085127599745	4.39977783317265	0.0947557835199941	0.0334962167814331	89.5264056258838	173.182766877266	3.22468096193135	4.42737317446456	0.159146164571532	1.3180880545838	1.00911322368752	0.862051815306667	6.48068590547864	8.75603699045327	3.22468096193135	0.484623391267878	28.0877624667702	3.22468096193135	2.19890180237378	8.76559157637221	0.509684709667549	26.7628722601643	44.8434007569426	105.759787939662	262.973064479797	0.414123923122015	31.580114397313	158.171661611749	36.8876150557334	57.0317688567317	21.2001058632187
Female	Mexican American	261	15311101	2014000062947	W	M	59	14	'5965'	FM	NA	3	53	352	712	712	59	352	5.03668846761503	4.33906627615856	-0.073387469025083	0.0104817479337388	71.2132436280911	155.581578642508	3.18015348162755	4.06662007126372	0.275887362490841	0.596091258553886	0.862438043671632	0.948195645345925	3.39522097491249	8.64455335093767	3.18015348162809	0.147778056425356	18.1031909369253	3.18015348162755	1.73248170847642	8.64455339397948	0.431573799490045	21.3930209782345	60.6176300773683	95.7171954678011	233.310263848631	0.143145620297482	35.2785375825609	117.483041026846	36.4844389367116	47.0112490179541	18.5490611969417
Female	Non-Hispanic White	43	10601302	2017001376338	W	N	30	30	'626030'	FMF	NA	1	06	353	363	363	30	353	5.11225124469482	4.31182688944492	-0.240445987971417	0.0553489623972853	58.6378798443376	175.49318444702	2.44930425420141	3.28703879315949	0.235807831367711	0.694723929930493	0.789618430907864	0.624762048017104	4.13395742043097	6.6535433906005	2.44930425420249	0.156094529558932	16.3051662817582	2.98864961919576	1.56105957746821	6.65789924635108	0.451411580661849	22.9406271163548	51.2576839593555	71.7006556702403	255.364430959186	0.127620247377028	27.870690246043	106.670745835491	29.2050662510349	40.5299995260528	15.6366296780014
Female	Non-Hispanic Black	56	10607301	2015001094283	B	N	30	53	'3457603031'	MMFFF	NA	2	06	354	371	371	30	354	5.09440041887856	4.44867447812412	0.064290473255932	0.0107578640946502	91.1917973210419	164.87016460631	3.7266271910791	4.36654036912259	0.369335012203217	0.888482973597887	1.12132698093689	1.03504484900431	3.64839698532565	10.1283583791248	3.7266271910791	0.45038149530334	25.1248100110321	3.7266271910791	2.45738754277895	10.1300229749517	0.592822902845568	23.4703300451785	78.0193869979837	100.381451824911	243.681056035559	0.181056860112173	47.1421247856748	156.074167792188	45.9569606022435	60.0261421690051	22.7027112343246
Female	Other	182	13702300	2018HU0920441	A	N	76	9	'76'	F	NA	1	37	355	920	920	76	355	5.01970792638516	4.24560613409015	-0.297066898372816	0.0242147529043081	51.8595568896623	155.077141357111	2.40893765352975	2.98245767630078	0.191895832317115	0.357718989902736	0.799542954105828	0.676565633617742	3.00581258843395	6.54817094745615	2.40893766218092	0.266327611328897	12.9137237446797	2.78976775665237	1.39714769502795	6.54817144948063	0.283898394634683	20.5279780336673	46.3350635835297	70.7581504527429	232.742692676068	0.111529851916202	29.0562477657189	96.4895294984266	26.251275931902	34.3859546633726	14.0165658992819
Male	Non-Hispanic White	151	12503400	2014000440359	W	N	29	46	'2933'	MF	NA	2	25	356	349	349	29	356	5.19697714481176	4.48594327422891	0.0151208016636115	-0.0278859855080439	90.1129673392197	175.755031550748	3.19689973551124	4.64581853505161	0.194028381815006	1.11675725613552	1.02408861044063	0.889867600056451	6.51953894647795	8.68972219707651	3.19689973551124	0.452902961524257	29.1048526051208	3.19689973551124	2.24217297825881	8.69007445028846	0.215684166643194	27.1876113718059	39.9462556945391	94.2735672304826	265.897091641822	0.424781308140324	36.1204134453506	160.168438671038	34.4760053610323	59.7796257259376	21.2511585485737
Female	Mexican American	261	15400700	2014000969153	W	M	27	52	'2730'	FM	30	4	54	357	331	331	27	357	5.06704649693081	4.2662749224468	0.247434978699561	-0.0159582095412223	91.2597559388811	156.192354194634	3.65173466076567	4.87936537890286	0.325393144266666	1.08730163334027	0.956269021017645	1.15165692074168	5.34743255059737	9.91249058601395	3.65173466076567	0.279320006259068	24.0303910041357	3.65173466076567	2.58947307319695	9.9264439707133	0.504228553566695	23.9907959960449	70.4872926936593	110.911158942234	233.996866945875	0.166017146310701	43.0647657723491	162.031393704027	42.4112129294857	52.1068133989299	21.3623617384206
Female	Non-Hispanic White	82	11201105	2014000573838	W	N	51	53	'11515621'	MFMM	5	3	12	358	619	619	51	358	5.09882684277039	4.28460775869603	-0.0257743190558579	0.00436706362190194	70.7274274971145	164.546615406343	3.03690732547932	4.1609278840676	0.291599537889033	0.818203514708351	0.796695403263268	1.09928341567205	4.87851713579044	8.25514057025722	3.03690732547932	0.400802876071149	17.468512433349	3.03690732547932	1.7244920812117	8.25516995695802	0.335199180079464	22.2892939813208	58.2615977974143	81.9362776072135	243.322309348279	0.150539419149848	41.3721868532752	135.579630861172	38.5697419900944	50.0926300705851	18.4736825928083
Male	Non-Hispanic White	83	11207102	2015000632276	W	N	61	28	'1361896139'	FFFMF	55	1	12	359	735	735	61	359	5.16724345882847	4.52661829197843	-0.0447069374711824	0.013080069193549	88.4034816905091	177.740305661818	3.25379869845715	4.14857946362894	0.201744209983944	1.21279396235611	0.6438632617994	1.06109208058837	5.18903131346605	8.79986839238125	3.25379869845715	0.328982013681881	28.7508717658534	3.25379869845715	2.03323789357286	8.84474187544344	0.654065381732851	26.1693149709683	43.6782255702394	106.901802826335	268.14654397358	0.456420399685309	36.3550609073149	151.739948192611	34.366688805481	53.0729861226371	21.8123718944255
Female	Non-Hispanic White	240	14800100	2016001147486	W	N	5	190	'38053302'	MFFM	NA	2	48	360	71	71	5	360	4.74159900129155	3.0420123043286	-0.00292852373767927	-0.0302496767908194	20.886098217347	111.20210644644	2.59903269733174	1.52993363513113	0.0794862253950454	0.141520671130124	0.0984932821601546	0.241960041703332	0.810837720827167	3.00260145418886	1.10459535230894	0.0570359612376349	2.52373472170047	3.00260147238376	0.381561333768426	3.00260147238376	0.109487068484485	17.8977807290566	16.7070264710887	23.9371020715447	181.363536152209	0.0414914625563471	9.56244208455562	36.3343621047712	9.98934263046977	13.2008450843744	5.00833297513574
Male	Non-Hispanic White	154	12300500	2018HU0985159	W	N	4	70	'33033804'	FMMM	NA	1	23	361	51	51	4	361	4.64992415746901	2.86517297321771	0.0200186404298041	-0.0144329598452212	17.9069984921035	103.078537494804	1.86847312108746	1.431972081638	0.0398742032628887	0.215705455502743	0.0990179049837944	0.21119663516082	0.59381951477119	2.74051361830085	1.00818343846428	0.0125227151280761	2.78892101917207	2.74051364984705	0.453401693103316	2.74051364984705	0.11385749107242	17.7617318585678	8.88872446228426	21.6321953569035	178.200512165924	0.0876955009012373	7.10682108949341	34.6677650249132	7.29523535989091	12.4416576824837	4.49144870564522
Male	Non-Hispanic White	225	14701900	2018HU1006858	W	N	40	20	'644025'	MMM	30	3	47	362	480	480	40	362	5.19306465446638	4.55909174900425	0.216063140752662	0.00991249940114367	118.528672076201	181.812721377235	4.10799900704408	5.63723090729425	0.245037798848604	1.4947926492673	1.63724481166563	1.58300397735066	5.81193210709997	11.1571203859116	4.10799900704408	0.642019760949329	37.3606183452073	4.10799900704408	1.93653252349501	11.1666989205705	0.539407502185955	27.8531403909682	60.7896737995389	135.598063865439	272.741335309129	0.516081414157683	42.5165660012429	217.792523690762	48.379364703748	76.7053566803392	28.0105283657444
Female	Non-Hispanic White	153	12902100	2016000368253	W	N	52	15	'5255'	FM	NA	3	29	363	634	634	52	363	5.09446418494127	4.28753701251039	0.050899696964233	-9.41448562251836e-05	76.5877168519045	163.10106512119	3.25340147388211	4.31393307357339	0.27885025322593	0.947895902000534	0.88013656800639	1.01377069675604	5.75910711463252	8.84365946556766	3.25340147388217	0.40036442289305	18.3417198467316	3.25340147388211	1.71836854270186	8.84366210713561	0.521625191450554	22.5408133508086	66.4069427665277	92.4813004032156	241.717343312648	0.167600391111937	38.9751095438297	119.340263927761	38.9904240132203	53.0641700452099	19.6600890249059
Male	Non-Hispanic White	188	13704500	2015001161876	W	N	20	11	'20312257'	MMMF	10	2	37	364	245	245	20	364	5.1707683633001	4.32325867251091	0.0156029109326446	0.00531824232977301	76.6202638928405	176.988826883586	2.78659797787415	4.04002865187109	0.164758478310145	0.94344238768725	0.844964078138762	0.883108157847306	5.51781299757831	7.5747575005746	2.78659797787415	0.441572229498317	25.3951492762755	2.78659797787415	1.78307519344255	7.57475864647442	0.275480379530871	26.4959877604206	36.5583357686149	83.8067695894581	267.295809303341	0.342901873767734	30.600769445848	144.708041646995	31.3065520846104	49.48161600347	18.6211490424731
Male	Non-Hispanic White	225	14701700	2016001362214	W	N	50	25	'5049'	MF	10	2	47	365	602	602	50	365	5.17775872158694	4.53663996001925	-0.0720681860953739	-0.0530360919091492	86.8838156568861	168.127501604569	3.25859804595456	4.68841169004254	0.162306933267292	1.05531148765723	0.869660075020662	1.23549992211644	2.79627554450674	8.8563079625706	3.25859804595456	0.376309621280567	29.037143337238	3.25859804595456	2.13162900347091	8.85778785456964	0.476166740870737	25.6629435209873	37.6567275555759	100.247545862318	257.194591350985	0.450421192550212	33.0867334106743	162.38990098573	33.398688808836	54.2963237079705	20.95234482016
Male	Other Hispanic	192	14101320	2014001474046	W	O	19	16	'1921421641'	MFMMF	NA	3	41	366	229	229	19	366	5.15875755703167	4.32769198808826	-0.0609818935209706	0.0833367431830384	71.2867228339442	189.065648292987	2.58470962452843	3.84974646971554	0.151589678992548	1.12472545320142	1.32144532867898	0.790397333401184	5.81249660370942	7.02574319787687	2.58470962452843	0.432032357861026	22.9008525561912	2.58470962452843	1.60954990542148	7.02596894063134	0.243329015480136	26.580166900547	36.2483622805412	90.2418947114768	280.861514272865	0.351438565049869	27.0832317011476	143.950855919905	30.6851810528207	43.4576103638618	18.1486364775175
Female	Non-Hispanic Black	190	13601300	2015000452683	B	N	15	83	'18575615'	FMFF	NA	1	36	367	185	185	15	367	5.08569588904427	4.16952306907312	0.403648303071691	0.0275065421025429	96.8507730880474	166.20175320742	4.02766070334006	4.92224338476583	0.369275548899655	0.993305409906684	1.71087386043925	1.07995976999762	6.77938204638191	7.60466601550536	4.02766070334006	0.472435971904109	24.5195304977599	4.02766070334006	2.33477885675489	10.94831686247	0.671505565724727	23.0464081315814	86.4403250091674	123.00797356879	245.15565466289	0.184269282207163	50.9116008810933	158.337085884849	51.6451197497779	68.5989566205737	24.6850949121832
Female	Non-Hispanic White	44	10606711	2016000036571	W	N	47	35	'446847'	MFF	NA	2	06	368	569	569	47	368	5.1098399247646	4.32109448867364	-0.146826507481517	0.0305035814464062	64.9922466967215	170.774420321144	2.70268521555345	3.30953419352362	0.268530107120771	0.779458883973479	0.803766684524188	0.851777138676916	5.30618993108375	7.34623002794393	2.70268521555861	0.351368975819953	17.8793607369517	2.70268889949432	1.39894542510562	7.34666010948381	0.283961475530807	23.04728686963	55.1705977582372	79.7699173883428	250.19713328265	0.14357077734988	32.9293100840406	107.81049451711	32.5114463781324	45.0344292525245	16.9051023274218
Female	Mexican American	119	11800103	2018HU1002715	O	M	18	80	'11131848'	FMFF	30	3	18	369	220	220	18	369	5.06948672121478	4.10479388010369	-0.0943260629311476	0.0291036096406855	55.1726752519932	163.790853571071	2.28423791117979	3.01205457668495	0.224333568065947	0.863328965176813	0.687643022637248	0.565946618352733	2.67945366176203	5.1364057221605	2.28423561324928	0.260265661293337	15.1294155950655	6.20255575847694	1.09561351489361	6.20919615490289	0.330465979436603	23.1536708962702	44.5247217324315	64.2725209202521	242.483643531304	0.1181572398929	27.0125689873316	94.5371008978098	28.7306262750686	34.2781435919387	13.8472443546162
Male	Non-Hispanic White	38	10606502	2017000101718	W	N	66	20	'66'	M	2	2	06	370	801	801	66	370	5.16373674963895	4.46577747558271	-0.146793561549901	-0.0252406147097825	75.1122689823043	170.459227789826	2.80616869686287	3.72731215191796	0.150200401387947	0.771468898079659	1.06326288741586	0.804560775714344	4.58832609735351	7.62773922068935	2.80616869686287	0.411433227838751	24.9607558877101	2.80616869686287	1.84452658207844	7.62795728443295	0.403498975715132	25.7668401640555	33.8340080935277	84.8446264280113	259.86521483558	0.360530290925277	27.7222756763689	147.91822763568	29.144157959012	46.2947953914159	18.2306407818787
Male	Non-Hispanic White	271	14802400	2017000324976	W	N	66	69	'6660'	MF	NA	0	48	371	797	797	66	371	5.16417594964401	4.47348607917235	0.0700602279884239	-0.00487296424064554	94.023646313426	174.043102734612	3.34675041751537	4.85869999367203	0.195205175082735	1.08622012521043	1.53448185421241	0.928926440302274	7.05876890496925	9.0973930183665	3.34675041751537	0.462725969297063	28.9935230804461	3.34675041751537	1.84942397310338	9.09741084364115	0.684202419939766	27.0940119769162	44.4242036233057	104.082023244376	263.952253800794	0.451707220247856	37.2116355279413	146.412114449879	34.2208162984836	63.6190215687595	22.0845578902982
Male	Mexican American	271	14804802	2017000438374	O	M	73	14	'7273'	FM	NA	1	48	372	882	882	73	372	5.13504761113667	4.37619491462535	-0.0350310638051274	-0.0533012079279159	76.7968674430826	161.055077572891	2.94080022054308	4.17304968689705	0.148430032973356	0.823039151628297	0.432124164397616	0.787222176886284	4.03359664074001	7.99203090928238	2.94080022054308	0.433182056509301	25.6851142457865	2.94080022054308	1.59778824874369	7.99392379975433	0.319485945770605	25.1142755997551	38.6966060102103	91.6307968359264	249.036829042497	0.346382469020151	30.6499480628974	149.774485412086	27.0721512135692	46.7472278540382	18.3091890442881
Female	Non-Hispanic White	199	13401504	2017000678818	W	N	41	14	'4141'	MF	NA	2	34	373	503	503	41	373	5.0946526432722	4.27447421444712	0.00326888099233658	-0.043036782383796	72.0775840730945	156.274778882053	3.00752993913739	3.48294705623274	0.283420455733991	1.28209638655231	0.928830741394145	1.07008019852587	4.16089222042046	8.17245729220971	3.00752993913752	0.502574438677305	19.6917320955217	3.00752993913739	1.71507954628405	8.17531398210369	0.393591776984196	22.9657079170316	56.7157638062549	86.4085330159314	234.089473175243	0.137655262881349	34.4461320880813	112.536302332071	34.1785664168261	46.055488750108	17.6007774752861
Female	Non-Hispanic White	82	11203102	2017000821440	W	N	40	6	'02404007080021'	FMFFFFF	NA	2	12	374	489	489	40	374	5.1012668287764	4.29053584391709	0.255729393921708	-0.0617392350693488	94.2796379438928	154.397059652366	3.72895476008727	4.62035458689167	0.338429030466507	0.755009059262056	1.11549857924393	1.09269651800208	6.81087119153541	10.1363487655927	3.72895476008727	0.40636038780953	24.8052842858539	3.72895476008727	2.22587783512157	10.1363499628367	0.397206980488987	24.2831273130506	68.942256547948	107.602276064716	231.976762702771	0.194636728690503	43.1862794914721	142.769343379236	41.9865150385662	56.1639203160144	21.6257713377534
Female	Non-Hispanic White	80	11205701	2018HU1328209	W	N	26	10	'2826'	MF	NA	2	12	375	321	321	26	375	5.11486037371434	4.30729304451691	0.228798017484704	0.036035297684038	93.3252834472107	172.586001456185	3.74012028321561	5.13364743886679	0.334699577531019	0.4711905517746	1.20221126383531	1.03251086016993	5.44407253191685	10.1426487058389	3.7401202832153	0.610138108255242	24.6325398491403	3.74012028321526	2.27504267577684	10.1667009467086	0.514153883321673	23.9524818402316	79.4445031363875	105.453597554828	252.185080446603	0.200634605931863	46.1465190872261	148.923628423752	50.2490612005704	63.4103324136856	23.5800633625653
Male	Mexican American	181	13500300	2016001177706	W	M	33	23	'33'	M	NA	1	35	376	404	404	33	376	5.14627526787612	4.44976014043151	0.263917985463666	0.0375002220761505	111.461375843288	178.354918630407	3.85506247917093	5.50572671421586	0.223739708988289	1.19969388402174	1.05592798542927	0.884303251523109	6.51471181008168	10.4752990237332	3.85506247917093	0.706121863722615	35.3443291415568	3.85506247917093	2.70511734723063	10.4791462847042	0.751552220555956	27.912988166993	51.7642276099933	122.579182890568	268.841667158493	0.50842182487596	43.3672558772459	192.784075450444	43.6666696818993	68.820124590813	25.9100355975116
Male	Mexican American	268	14804302	2018HU0882391	W	M	5	83	'291011050602'	FFMMMF	NA	3	48	377	60	60	5	377	4.69291709761583	2.99213360634001	-0.0430634009544142	-0.0325329259215418	19.0881973715137	105.676672345621	1.03696875203595	1.5102205062073	0.0391197479630048	0.233303919878058	0.0900141014858732	0.154565732949376	0.855333897150739	2.81850427740396	1.03688604414585	0.0506607870077001	2.96618597456517	2.81854786280508	0.406182462695599	2.81854786280508	0.0887553267699769	17.2189012970842	9.78897424544281	21.8440432224478	181.558718573016	0.0892723262465139	7.6341935146702	35.5315332734377	7.33079719295298	12.6583058636855	4.70639148643481
Female	Other	264	15502400	2017001117254	A	N	43	36	'431620171847'	FFMMMM	45	6	55	378	524	524	43	378	5.07744947509698	4.25005036066	-0.0390957916117487	-0.024573825792589	67.4208669756926	156.471776099551	2.82291447917943	3.47495410967532	0.273033906749929	0.899654385657186	0.667008290687173	0.792639295398871	4.36423368691672	7.66516497736886	2.82291447917968	0.373032367572317	18.8345090923421	2.82291447917942	1.70078389915901	7.67347713204686	0.465520860928727	22.8834252588812	52.0360665052132	78.8648519068346	234.310755101891	0.13658615652308	31.3007414525032	111.234016819512	30.3854398870011	43.8612604103645	16.5359805801142
Male	Non-Hispanic White	76	10900302	2018HU0731598	W	N	14	21	'2714'	FM	NA	1	09	379	169	169	14	379	5.11967969842337	4.0923545226719	0.0690600806210765	-0.0574215759973442	64.1622225238729	157.946777091236	2.88773224048851	4.26797794400889	0.152193284573476	0.719669864979728	0.819647718737189	0.964073905715625	3.1355935661265	7.2125156218857	2.88773224048752	0.299074153378386	16.6376200778363	2.88773577687927	1.57224003990641	7.84967006976016	0.272697804256182	21.2188960680928	34.8773003931919	86.0109736197716	245.423326492632	0.374553323819044	29.613577618901	148.087243330277	28.9853460241581	48.4129284722251	17.7179213120118
Male	Non-Hispanic Black	117	11802700	2016000614643	B	N	78	25	'7878'	MF	NA	3	18	380	941	941	78	380	5.14265480662726	4.39819060724956	-0.13885812675275	-0.0101615163780646	70.7627321816278	169.439052561285	2.69829375657013	3.59473501294748	0.164783592663742	1.11667036927154	0.225246402498681	0.815118261665133	3.83437976677496	7.31910552355553	2.69829375657013	0.471404574722326	23.8321511953241	2.69829375770241	1.69931902641136	7.33472287073936	0.587804550794901	25.2249920007139	32.8063870394312	88.4446633915391	258.697896626722	0.341870973724531	27.2456847277117	132.311028786522	26.1754178558804	44.733700145256	17.4510729826427
Male	Other	47	10603900	2015000461963	A	N	52	14	'091052345128'	MMMMFF	NA	2	06	381	634	634	52	381	5.1406774537096	4.34494671880553	0.0386417156831385	-0.0385262297899572	80.1250416047438	164.375134949895	2.9590150013884	4.1681986712811	0.146635603493918	0.877087721910274	1.03882303715043	0.857751936782543	5.05055037668495	8.04221010051978	2.9590150013884	0.376009617868067	26.1348719302171	2.95904137152576	2.07278803589921	8.04343670798588	0.33730508478016	26.0782816468143	40.7284438974101	86.8092700766479	252.877304554921	0.368180350241934	31.5431261508313	143.875625701325	31.7326409737088	47.1581985408671	18.7066934422169
Female	Non-Hispanic White	115	11702300	2014000008858	W	N	70	58	'397070'	MFM	NA	2	17	382	841	841	70	382	5.08370141678906	4.31789803221736	-0.200689312004058	0.0247735185542812	61.3876527843429	165.417889432849	2.7965986563929	2.97338259310709	0.278535799668493	0.509611314402017	0.865931860088545	0.788381915453445	3.67121334598516	7.59936034996298	2.79659865644903	0.350282516191159	15.2536651868624	2.7965986564095	1.81556019798165	7.60194330916079	0.424588286931947	20.9508268174317	56.925950479771	82.8339377483713	244.287964575903	0.141438630769057	36.046963931564	116.361587361138	34.2237513540946	46.1655420317374	17.0793848376482
Male	Non-Hispanic White	263	14935004	2017000734394	W	N	45	24	'45501418'	MFFM	NA	3	49	383	546	546	45	383	5.18010782459545	4.54971826795567	-0.1285037580515	-0.00546122681761345	83.1972679296647	176.734144999117	2.96825674986063	4.31292660042381	0.173071100573183	0.923758997652289	0.861970994182728	0.420108420372973	6.56647665075235	8.02892413148252	2.96825674986063	0.283782657390675	27.0728095599279	2.96825674986063	2.36863600175834	8.06855838523675	0.636527381665696	27.0289998274479	41.1159693390738	91.5403380456278	267.007284087692	0.388024367018528	31.8274069660508	168.394915194931	31.0523029217693	47.384554683449	19.8136543313812
Male	Non-Hispanic White	188	13701600	2014001092832	W	N	58	95	'5558'	FM	NA	2	37	384	702	702	58	384	5.17373971644413	4.49799831722585	-0.209150570395782	-0.0200572164543997	72.8824410747354	173.067639869645	2.72324082391991	3.74341996291737	0.141317572015842	1.00337014026717	1.04345637341227	0.804637629178071	4.89689502869083	7.38968640613867	2.72324082391991	0.494337944244513	23.6185479317205	2.72324082391991	1.56868862463167	7.40253604613078	0.554191492270231	25.7631273865182	35.8139277920723	89.2121902321591	262.841940787416	0.347292572690408	29.4520168394027	133.951890465827	29.3974064632154	45.9424921999601	17.8945475847658
Male	Non-Hispanic White	8	10400101	2018HU1273427	W	N	33	6	'4033'	FM	NA	2	04	385	399	399	33	385	5.19330890653976	4.51609848605899	-0.153547936993708	0.0364555239466762	78.4569878437739	186.748806012745	2.74971218278391	3.9210227596889	0.157179002776198	0.668126389262628	1.33898521759811	0.77634910991692	7.45017896439298	7.45814853478251	2.74971218278391	0.295665783515616	25.296059646325	2.74971218278391	1.91449083534773	7.47449265995379	0.567935850045831	27.5328000272163	36.8438192112078	102.886347361997	278.276246788216	0.367849544231452	28.5889065351401	140.971152237582	33.4457590406671	46.5323638589803	19.1294896493235
Male	Non-Hispanic White	227	14700500	2016000231072	W	N	34	24	'073434'	FFM	20	3	47	386	416	416	34	386	5.18858652905512	4.50637058085373	0.123304117777888	0.00799170987572101	102.480721568641	180.653031574001	3.53068538228097	4.81218877209901	0.175893393489242	1.24870218158328	1.16768464292462	1.07216936773279	7.4650567552182	9.59739614148828	3.53068538228097	0.527086352287701	32.5106030912568	3.53068538228097	2.52084239965381	9.59739786874523	0.657081349461589	28.0257302683917	47.5719630261441	115.130378406794	271.435534752153	0.469732107701805	36.4096798749427	190.304433741817	39.0796708182739	59.9416232454501	23.9588368695261
Male	Non-Hispanic Black	179	12603205	2016001074497	B	N	9	26	'4757125009'	FMMFM	7	2	26	387	112	112	9	387	4.92457592589944	3.56045726926772	0.109799312599989	0.0631672815596444	39.2619784797916	146.605192371709	1.97271086834238	2.96911590670609	0.104891582916251	0.312825383953061	0.366503486283959	0.582932323291339	2.13888937554746	5.36180893127334	1.97258148833015	0.117291315475794	5.82657588580307	5.3620324142358	0.949942801688374	5.3620324142358	0.249232226972297	18.9038561251377	24.3024860264193	61.1095191404095	232.083772886351	0.223731406624508	18.1593810963958	84.924921738619	18.8789082739147	29.4412754507762	11.4451038520554
Male	Other Hispanic	190	13603702	2015000241640	W	O	3	89	'1206333303'	MMMFM	20	2	36	388	38	38	3	388	4.58183425403225	2.75886050250531	0.326919512001444	-0.0613571083773421	21.884530437499	91.8794273903731	3.00912344391777	1.53799540660171	0.036578611833514	0.235080002854979	0.0746959681373132	0.209099263379496	0.524594112577989	3.01002360500443	1.22697846038009	0.0420820075114573	3.08333438579853	3.01002381293611	0.465116617007488	3.01002381293611	0.145137918805355	18.746832582633	9.18667872144538	22.1284133629155	163.473165283927	0.0965554840919708	7.38391964486889	32.0290033304782	6.87252570765859	11.8832632793503	4.52545165781799
Female	Non-Hispanic Black	121	11600800	2014001487644	B	N	80	23	'80'	F	NA	1	16	389	969	969	80	389	4.9952385139569	4.24905189711888	0.139261587474657	0.0495822699245325	80.504532291189	155.216479410579	3.47671454721967	4.24843650798311	0.328749830633939	0.861033570564444	1.17893636785487	1.03078439291413	5.42164075402753	9.45029213128693	3.47671457175253	0.495128210891519	18.4451637542924	3.47671454721967	2.0170701464748	9.45068997644588	0.514858343314967	22.1553471525491	69.6960369157588	94.0107381054882	232.899515947305	0.176133866769912	41.0960002124847	143.786046567481	39.3993455367428	51.6604309473902	20.2431283783603
Male	Non-Hispanic White	225	14801300	2015001490895	W	N	54	20	'5453'	MF	NA	4	48	390	653	653	54	390	5.17326495903144	4.50509026376094	-0.0389346458891241	-0.0135708833183227	87.0215350967488	174.111182617396	3.1626895278715	4.30845029348231	0.175724065467487	0.930729466043769	0.474767003826758	0.897806670009173	6.26355113501867	8.5970800458549	3.1626895278715	0.277058407150876	28.1180921813276	3.1626895278715	2.03872391622081	8.59708146994266	0.756273736677645	26.5150419697739	41.3769255814091	106.785877224221	264.029687033035	0.451712468403431	32.8472861037049	167.633583689157	33.382311336786	53.9073956909132	20.8760981556642
Female	Non-Hispanic White	186	14000300	2017001003995	W	N	46	38	'0946'	FF	40	1	40	391	563	563	46	391	5.10989630253689	4.32931792866843	-0.287055633841257	-0.0545890338986469	56.9550462745492	156.852718861708	2.43059430527733	3.26361323371442	0.234116761553241	0.660095263100504	0.385369067886817	0.761489603219182	4.27672987451154	6.59563597107949	2.43059430527776	0.33272925489407	16.0631261357254	2.43059430527733	1.24416348601314	6.60704033234027	0.302133346199482	22.4325597451114	50.992979561373	62.294837180912	234.738460911669	0.113266758071826	29.0561475624509	92.2588938868247	30.729035744852	39.2288318111997	14.2638491580367
Male	Non-Hispanic White	119	11703504	2014000973767	W	N	32	47	'330132'	FFM	15	1	17	392	395	395	32	392	5.18788955708329	4.50009910972577	0.186650895627363	0.0932413302473149	108.499981812431	196.592073172615	3.70694087036987	5.41064347658648	0.220927495888074	1.56735054106552	0.919575577737768	1.08947578440144	7.39346206905408	10.0758477721115	3.70694087036987	0.613382820645981	34.024145198974	3.70694087036987	2.9773566534349	10.0765100070934	0.399999134258415	28.2694125983199	56.7910288751471	134.889918205184	289.205976708115	0.569326380423035	40.6318107614472	185.53956390434	44.3338191846711	68.1032982473121	26.8017363753637
Male	Non-Hispanic White	156	13100904	2014000030401	W	N	11	24	'1138083915170912'	MFMMFMMM	NA	2	31	393	139	139	11	393	5.01702812040556	3.79914346908599	0.0121098093038097	0.0284089262450136	45.2070604095069	155.312163028095	2.36214811632926	3.39462967270233	0.120456465750863	0.55670119185604	0.447812400292246	0.664393801579028	2.1367394273811	6.42039879552053	2.3621461940293	0.16091897756474	8.31626781320549	2.99397519968521	1.16997670510005	6.42097907538082	0.298443151690783	18.1381297752759	28.7233779020706	62.0417619210035	242.346561954855	0.275306936562474	23.0117946996149	118.157997654312	23.3216190373149	35.5976419311098	14.3114502239437
Female	Non-Hispanic White	192	13903600	2018HU0611413	W	N	64	122	'002602646404'	MFFFMM	NA	1	39	394	775	775	64	394	5.08772961018659	4.3106575785589	-0.168215054055331	-0.0207283561210447	62.9564063705953	158.69771894721	2.78468803635436	3.21263050671969	0.243503891828739	0.701503034345885	0.932176149291473	0.713775175283821	4.82708338574799	7.56942931835556	2.78468803328298	0.201857195439111	15.5714502360044	2.78468803328123	1.69478789584766	7.56956687879559	0.340134849121719	21.6080643929126	54.2524277849944	78.2592038016847	236.806286684183	0.130304101741968	31.615193254794	110.726322711679	33.1786556637738	42.2027746295049	16.4857908183802
Male	Non-Hispanic White	263	14949003	2018HU0472370	W	N	35	14	'351471340511'	MMMFFF	15	3	49	395	421	421	35	395	5.18474346025161	4.49799716343485	-0.0634331684232814	0.0431210313494735	84.3153549575741	186.394331540955	3.01134588000858	4.24169192413947	0.16581775705585	0.621323334864771	1.2741777334244	1.17207816616315	6.01384062747669	8.09044096834476	3.01134588000858	0.74976137065316	27.6399377572556	3.01134588000858	1.5289739754598	8.18568678459343	0.652814289779909	26.999226364968	45.4913812813636	105.284318506839	277.87999827664	0.426239351287906	33.5103793031542	156.498100749968	34.159312581097	54.5656749115536	20.9198196986788
Female	Non-Hispanic White	120	12001303	2014000728622	W	N	10	23	'1342427410'	MFMMF	NA	2	20	396	123	123	10	396	4.96050150281925	3.6531162310374	0.0431500336057895	0.0123008188681164	40.2965664126095	144.431063091657	2.02236515519078	2.96201945464137	0.165706136284751	0.611192811437314	0.420966470049156	0.445419489534927	1.78827426079247	5.49720014809122	2.02236515519093	0.146774377531191	6.01610859933805	5.49735845186377	1.0710116372948	5.49735845186367	0.279845184328681	18.9254651461781	38.6156508444465	49.5963646513351	220.653423666304	0.0914459195430196	21.6874626369141	79.3097798582684	23.5819151572504	29.9776304902364	11.1560448849069
Female	Other Hispanic	55	10603729	2018HU0022457	W	O	33	12	'3933'	MF	NA	3	06	397	405	405	33	397	5.06929702513134	4.28292731412752	0.0577554172873193	0.104398573785402	76.7599278667693	176.566150922255	3.14013235162099	4.11938589338965	0.296807907037537	0.523854967401597	1.10665374911156	0.92146452861217	4.76455893441833	8.5331832596028	3.14013235162099	0.399258778646393	20.7614495729704	3.14013235162099	2.3759570858904	8.5357647103646	0.532351431120636	23.4448065468147	65.8230127616515	93.3991765963568	256.534513161026	0.1644302104363	42.6402988704648	140.325086520062	40.4543309363566	52.4015971939427	20.138808102107
Female	Non-Hispanic Black	94	10900301	2017000894180	B	N	75	22	'45751916'	FFMM	15	1	09	398	903	903	75	398	5.07075668617312	4.35450765720249	0.0705682620454781	-0.0662008619015415	83.5191476922398	149.090845913905	3.64868495332137	4.42170251738057	0.247176867114415	0.7716898331573	0.800473923733278	0.814034004111054	5.56036809369703	9.91807977817759	3.64868495332205	0.348875775798748	19.371805727461	3.64868495332137	1.9752745075718	9.91815400638542	0.45422514191709	21.8902053097823	72.5095507560049	99.5884649563016	225.971385587004	0.161182427478206	41.5666334263285	133.612959684507	41.1565973958765	52.9371179609196	20.6124598618121
Male	Non-Hispanic White	259	14802600	2014000596229	W	N	46	62	'184648'	FMF	3	1	48	399	553	553	46	399	5.1806401502561	4.53776231462374	0.0864540705743388	0.0313351871435257	101.922873509208	183.456088182487	3.54223949164734	5.08086626314223	0.1951367945642	1.29868564469512	1.02189459316903	1.13208969568264	7.35280876583094	9.62879579687349	3.54223949164734	0.445525585064559	32.095729423778	3.54223949164734	2.6541760132767	9.62880524217502	0.250746024981387	27.773569305391	51.1714332323477	118.154863598291	274.588192629025	0.523935269361209	39.4900839100773	187.639041936247	36.2735725192406	68.7434952036767	24.316428496765
Male	Non-Hispanic White	152	12602800	2015001192341	W	N	19	25	'585519'	MFM	NA	2	26	400	228	228	19	400	5.1836132175639	4.3482597018868	-0.0707968687339403	0.0343049357003323	72.0573862750427	184.549579925595	2.65239305243786	3.67548374155831	0.160532980426369	0.964770760341248	0.867640347898987	0.858350141856684	5.17170458897493	7.20977754033435	2.65239305243786	0.129326968354999	23.9501497759854	2.65239305243786	1.80714813265144	7.20995183635188	0.460125246117199	26.1669337275686	38.5315316600091	89.099177072863	275.814794449729	0.350367252400211	30.0034479438105	149.40721709874	31.0731664470555	48.6184391784422	18.2892311139509
Male	Non-Hispanic White	81	11304300	2016001018232	W	N	54	28	'542151'	MMF	149	3	13	401	656	656	54	401	5.1726583816337	4.50089092179412	-0.0890014896828601	0.0328333875784588	82.4250530119415	182.270485745698	2.95340654357146	4.42116956206967	0.165627693378891	1.0716458264079	1.27670909533569	0.99614023108267	5.33259846483137	8.02818629567629	2.95340654357146	0.473422747011565	26.9100595902272	2.95340654357146	2.07262533360232	8.02819126879315	0.393620256013464	26.908468338486	35.676074053441	97.8397397087955	273.256200324484	0.371396487196675	33.2263695106809	158.194413421792	31.6982306476639	54.6648185061501	20.1759162527451
Female	Non-Hispanic White	191	13604103	2017000447992	W	N	57	26	'1736576355'	MMFMF	NA	1	36	402	695	695	57	402	5.08774397618813	4.29738928405941	0.225875704295737	-0.0401047745425484	92.1359301598823	155.654561352412	3.90967696611432	4.75638437811608	0.387650851369034	0.569487301935359	1.03379187393759	1.00430443911005	5.16714253292975	10.6276016139214	3.90967696615689	0.153555225399053	22.2554960670806	3.90967696611432	2.47931679718594	10.6276038521334	0.504466339076489	22.5661234824351	75.1467074187498	111.218778681198	233.392342735473	0.185713479422697	42.8600481572576	150.709459151913	41.8382798655703	62.9336293479973	22.8122166615084
Male	Non-Hispanic White	154	12503500	2018HU1353175	W	N	50	10	'50164749'	MMFM	NA	2	25	403	607	607	50	403	5.18278401662392	4.5529542320962	-0.256732102682511	-0.000482975640608129	73.4218906880941	178.09213718105	2.69473874881381	3.49097395951866	0.141553005570864	0.982037114003806	0.926919014798804	1.0366149683216	5.42436454575056	7.32505855876967	2.69473874881381	0.410039621129888	24.0147206314017	2.69473874881381	1.81205406978812	7.32505937184618	0.454458581065131	26.2463854688746	34.0561445834578	97.7495549865783	268.54453648856	0.358311905939153	29.7463399539804	142.818462984558	30.9591651261882	49.1161185458434	18.0914342064492
Male	Other Hispanic	154	12500100	2018HU0443520	W	O	10	64	'5010450872'	MMFFF	NA	2	25	404	126	126	10	404	4.96476696170237	3.68332748153134	0.210887476061512	0.0977875496651915	49.117478919494	157.993597707531	2.4671981837631	3.53238266655462	0.12745499731976	0.781824739651679	0.782503278616071	1.0090137543697	2.34988611406851	6.70318414601666	2.4671981837631	0.252864494928171	7.90483684956643	4.01206089854629	1.6225613049087	6.70653999013039	0.235191058811376	18.9082016364723	31.0422148140863	75.9744837793652	245.477888126683	0.30086720993243	24.7242226414668	119.091161397972	23.4070938777239	39.2554037453835	15.1410649935039
Male	Non-Hispanic White	9	10501100	2017000434128	W	N	28	14	'2528'	FM	10	5	05	405	336	336	28	405	5.19016173696586	4.44882193239537	0.00180877638385059	-0.0206198202320498	85.6809667020254	175.83427229493	3.19306447998247	4.50646045323503	0.182683549493231	0.829586846153594	1.37006112318344	1.27075394797955	2.8582109094106	8.67909639685501	3.19306447998247	0.287139490779312	29.2450134780177	3.19306447998247	1.6784680787455	8.67964915303435	0.463097340028737	25.8334595931792	43.1250568024809	99.2341008481489	265.986998155499	0.413719420725192	35.0834082070421	141.619333558111	36.4483714217397	56.3092398385051	21.2328408986872
Female	Non-Hispanic White	80	11207105	2015001334807	W	N	33	9	'3334'	FM	20	3	12	406	401	401	33	406	5.11031497304717	4.3115929018622	-0.111870908392215	0.0115575806665749	66.6677943822084	167.649007649309	2.82395221584239	3.86446730139954	0.273146073439865	0.787681825283541	0.991497583954646	0.885438750779082	3.14013483523915	7.67629585896391	2.82395174501357	0.415918721537032	18.5262851938998	2.82395174501357	1.81343431566599	7.67629671291558	0.472857947000455	22.6079793147769	60.2900565962128	84.7419740057806	246.754996140302	0.135573722915548	37.5929094732867	108.789100789488	34.9200740834483	45.9321766122538	17.4206050485306
Female	Non-Hispanic White	260	14806703	2018HU0699125	W	N	78	19	'784982'	FMM	NA	1	48	407	942	942	78	407	5.0695006391479	4.23982505405368	-0.172469463670013	0.00368120979560839	58.4023185581135	159.681602617258	2.57575453193953	3.24755798108159	0.236109068078989	0.945935577224271	0.560859358907405	0.897669902870091	4.16127319069985	7.00130420541897	2.57575453997292	0.329261758945079	13.9261163191503	3.52407975648082	1.40450833737577	7.00162673874213	0.368541034298879	21.6738681166702	58.7346091596693	73.5828873974211	237.906537582874	0.1335948202876	29.775410375489	106.479843820579	30.7704226237469	42.6109598513198	15.3197210589282
Female	Non-Hispanic Black	46	10601305	2017001106116	B	N	31	19	'0062386331'	FFMMF	NA	1	06	408	378	378	31	408	5.09250560305361	4.44798503139292	-0.346474456612017	-0.0397048339902471	60.4315049920814	156.460059893905	2.64215857639837	3.34279680693734	0.222350079342872	0.718905774904858	0.609790129838216	0.731572415608404	2.45574180593414	7.18203624247845	2.64215857640679	0.203326704165413	17.5994511007293	2.64215857639837	1.70541856732315	7.18213164613062	0.404877310710855	21.8720204502101	54.525450792326	74.2510318495549	234.297596537026	0.122147217498137	35.23535885112	101.599940912782	30.1566737319983	38.4828818986342	15.4762851029957
Male	Non-Hispanic White	44	10607111	2018HU0736005	W	N	61	14	'6165'	MF	5	5	06	409	735	735	61	409	5.16724345882847	4.52661829197843	-0.158918366010998	-0.012477699478451	78.8620344185069	173.255218590356	2.8137499235375	3.81899344392106	0.158961261076317	0.734811356639428	0.95391012681449	1.08934475705749	7.5086425857274	7.64837472527865	2.8137499235375	0.360973933761881	24.8495104512482	2.8137499235375	2.09624821017697	7.64856528697984	0.309490549866051	27.0273786091693	38.0005944684472	85.7864943911975	263.055572051916	0.379427345355144	29.4142202841186	128.69408871699	28.9354464200113	47.6785774240764	18.5043148936798
Female	Non-Hispanic White	97	11202101	2017000968721	W	N	54	23	'54'	F	25	2	12	410	651	651	54	410	5.09451445676022	4.34379350105046	-0.234983947246328	-0.00374175174486736	60.8742069500996	162.515390006134	2.73562035522649	3.7449581234171	0.263100408033668	0.659350099040814	1.09221480757098	0.785749314800364	2.9111136928161	7.42554323629807	2.73562035525114	0.223125053255866	15.5595723805702	2.73562035522649	1.68535851729429	7.43618704742194	0.318603025524374	21.2524323719837	49.4760399168082	78.0570746316466	241.066068570725	0.124766873440801	34.2642253563258	115.140571266379	35.7443468844607	44.6521463826249	16.4866311034125
Male	Other Hispanic	197	13604002	2018HU0653542	W	O	15	65	'4115'	FM	15	2	36	411	181	181	15	411	5.13128123361541	4.16815721715829	0.0909969604563615	0.039968581156186	70.7501161073053	176.134835896492	2.90689140187444	4.11140797637276	0.166455128807061	1.01549794076842	0.897717523613272	1.26985868848215	5.20633801055796	5.79139666519353	2.90689140187444	0.241127708557023	19.8245265266556	2.90689144422333	2.56986424818427	7.90175007225724	0.460453470894014	23.3387544721085	40.1769589725106	95.6848079018952	266.327925463961	0.401693287232245	32.4547252367681	143.498699430271	32.1044879271665	50.3781436147852	19.3546589152561
Female	Non-Hispanic White	44	10606712	2016000628196	W	N	47	35	'5247'	MF	20	3	06	412	566	566	47	412	5.11021148297256	4.32648252366063	-0.103313285442714	0.0126176793668463	68.2494406357238	167.809458868386	2.88465473256179	3.29061022866989	0.234404217186415	0.847872026437779	0.69700249596756	0.67076582664641	4.11746203890397	7.84130439843708	2.88465473256179	0.390749864407429	19.0269843235219	2.88465473256179	2.00166398572754	7.84130454045225	0.497522378663441	22.6594833569948	61.0311497709595	82.8642267407046	246.932095631594	0.147659249200226	37.2161257066037	127.400445889598	38.3689901764898	52.8328778396976	17.807845957127
Male	Non-Hispanic White	190	13600702	2018HU0831031	W	N	36	99	'2936020008'	FMMMF	NA	1	36	413	441	441	36	413	5.18536819483521	4.50496115029138	0.261625397146618	0.0246481260719541	117.517416418465	183.09704647923	3.93627383475773	5.71471063532793	0.219157285760898	1.10063677826074	2.18536960856047	0.815781938838006	8.85855577391809	10.6994220908278	3.93627383475773	0.348344178582218	36.1985215167741	3.93627383475773	2.92357419271405	10.699901635937	0.267051069245121	28.8549901129269	52.4088754766598	138.800140833546	274.185046766575	0.522614528488927	42.4852419772741	203.452842506459	43.7021938782641	70.8130743738879	26.9816856367273
Male	Non-Hispanic White	39	10609701	2014000028736	W	N	48	60	'48'	M	NA	2	06	414	586	586	48	414	5.18312073562008	4.46138088963109	0.0206758067894955	-0.0441585002150468	88.4163313554587	170.538697435996	3.1153786355169	4.38400800783967	0.149987125265804	0.998211697164237	1.14292252790888	1.21287915775083	6.99343341367513	8.46823212474261	3.1153786355169	0.483717695805233	28.3794016848035	3.1153786355169	2.12546814431773	8.46847713369495	0.201911662850357	27.3806052809978	39.9558923697912	104.143751444156	259.956073190798	0.423249681722129	33.5516500454031	155.371685805878	33.7445568065639	53.0245874940774	20.246539914787
Male	Non-Hispanic White	83	11208622	2015000650033	W	N	41	21	'41386217'	MMFM	NA	4	12	415	494	494	41	415	5.19355347089409	4.57634101131453	-0.0149309553397903	0.0113907338451766	95.7183529538672	182.170708223054	3.34507586117493	4.45138656074836	0.207185185045614	1.36888522675622	1.19545780529016	0.893155444917635	6.10953053082663	9.07994396304418	3.34507586117493	0.537413920664573	31.1243119533741	3.34507586117493	2.51214530587214	9.09285798640213	0.717073485167672	27.6147032014535	42.041273285751	107.49926995429	273.144004323545	0.433451702105314	35.4800913092763	173.601473020101	35.8929467267937	54.6305583644653	22.8421853871838
Male	Non-Hispanic White	77	11206100	2015001483082	W	N	10	9	'540810'	FFM	NA	2	12	416	120	120	10	416	4.949587676935	3.59803402034031	0.501366238848858	0.0346194886451457	60.3041099140534	146.08770573822	3.04100511984774	4.57131480426878	0.141567917808767	1.04014291734003	0.709905963590004	1.07780211022985	3.57059021235015	8.12414821278442	3.04100512046945	0.293613167339546	9.7572532434887	3.04100511959063	1.73203544027431	8.26630895498944	0.236306461984327	18.8303217332864	33.2978993030827	85.1832698807244	231.469094864067	0.390051505344215	27.2730700253814	133.308413811186	29.2434068622648	49.3576396403403	17.5974675627159
Male	Other Hispanic	190	13401302	2017000182078	W	O	50	23	'1465415068'	MFFMM	NA	2	34	417	606	606	50	417	5.15584811246137	4.44044522734308	-0.509807135482383	-0.0167270605148636	50.9394713631833	170.565783952947	1.96204832602737	2.56173365991958	0.104086900612997	0.719548350846103	0.407223623281503	0.589718227168481	4.3346481813398	5.33310929563867	1.96204832602737	0.25638322015817	17.2280904673422	1.96204834523129	1.21866699400276	5.33340031119648	0.307220696071016	24.9623938347748	25.9563184161909	64.0604983947266	259.987039028329	0.255508997015147	19.6112670249423	93.9813954134154	19.6337390356433	30.8863234876234	12.7526783678587
Female	Other Hispanic	190	13402104	2018HU1400156	W	O	70	61	'4847701216'	MFFMF	NA	2	34	418	840	840	70	418	5.04417520747418	4.28343872530778	-0.0524730741397229	0.00842418573551046	68.7836210984733	156.428555787968	3.08094704926119	3.9326410432146	0.285664784877804	0.66835480517163	0.782725097145255	0.872247086815276	3.52869371454717	8.37488220713917	3.08094704879383	0.282623008711236	16.5261300019233	3.78150150480402	1.75972214823549	8.37488237538646	0.41053353550447	21.3254797986229	63.7611907418483	91.6571958792031	234.262212800243	0.144668167528946	37.3709784132791	118.103976158545	33.5064345492348	47.305131773703	18.0437368292705
Female	Non-Hispanic White	263	14911001	2016000991463	W	N	46	15	'45131146'	MFFF	13	2	49	419	562	562	46	419	5.10965994398487	4.32947613491687	0.290284820267513	0.0693251060592267	101.469773406926	177.502563318841	3.95558016379897	5.03857382331601	0.399322124961331	1.02520706777794	0.848425278404664	1.45967492102387	6.72752866029619	10.6901737499603	3.95558016379899	0.684881349107896	26.4324528292199	3.95558016379897	2.28330808763109	10.7523816802675	0.441047502823469	24.6523112173445	81.9955605572159	130.877178442935	257.55422955358	0.190786475932622	52.2409831086246	171.360683899846	51.7431104770096	65.16893070454	25.4694100381167
Female	Non-Hispanic White	80	11208608	2017000089263	W	N	65	13	'703665'	MMF	20	4	12	420	789	789	65	420	5.08711564633612	4.32019656974318	-0.202293979472081	0.0393458158238616	61.4302626196633	168.420101482872	2.82752150718964	3.44255483005109	0.256301311285558	0.968195813098764	0.765368561895197	0.739129572685408	2.81991371458511	7.68598002134698	2.82752150718959	0.291384487702676	15.1742824465555	2.89896713476365	1.71563387733026	7.68600033257059	0.340302723001774	20.7258339020458	63.2288310210766	82.2262938274427	247.605711310279	0.144367860154657	35.9406262228632	121.041467864385	36.9167424141891	50.688974629979	17.5027618508198
Female	Non-Hispanic White	48	10608506	2018HU0723948	W	N	17	18	'6149231721'	MFMFM	30	2	06	421	204	204	17	421	5.09569164010017	4.13776553730546	-0.223093573761294	0.0403295181932859	50.1326234852783	170.037866828061	2.06947210361882	2.61993600446098	0.198006508548436	0.618332974225709	0.261100850153195	0.655880606831501	2.52988098345866	5.6041678864528	2.06930470062242	0.274582945331217	13.579824253167	5.62493160552046	1.17375237569811	5.62495336524657	0.283426969985055	23.2267963099863	45.9554074124079	58.6507453324912	249.387367232264	0.106452261396303	25.5651927250986	86.0011693555524	27.9563555746992	31.0876383298335	12.9014612822393
Female	Non-Hispanic White	79	11200904	2018HU0217001	W	N	67	24	'678087'	FMF	15	1	12	422	809	809	67	422	5.08484427710079	4.28600997737133	0.119232329792941	0.0572839874303	81.878980303222	171.079483539751	3.53822167097645	4.41241917836978	0.352306656425215	0.839583992324263	0.953882510954126	0.994063541436837	5.00066132299771	9.61788123260941	3.53822167097645	0.526080546049666	19.3430418864619	3.53822167097645	2.02362732762126	9.61788367326338	0.428480573005932	22.141280540692	73.7750382449027	105.851462850203	250.532263591555	0.176589412790679	41.12215632416	157.37806600665	41.7606035269568	55.4124140077921	22.1609671079606
Male	Mexican American	236	14501203	2015000074873	O	M	54	37	'5054'	FM	15	2	45	423	655	655	54	423	5.13628812697229	4.43967565188705	-0.102970912686061	-0.0702964105588322	76.4551840075947	158.537588467106	2.86228386985098	4.43098990907589	0.144734391957728	0.996617476714221	0.643808721076348	1.12600939373883	4.13918442298169	7.78049347275216	2.86228386985098	0.466344571961395	25.1610080350813	2.86228386985098	1.85920458692293	7.78049422635783	0.191846641853373	25.7112513936555	34.1373592227528	88.4846418915939	246.11152287728	0.324536226127952	27.4030959768819	133.669420782769	27.596996904853	46.9102158681199	17.6110260529025
Male	Non-Hispanic White	153	13401101	2016000371572	W	N	30	31	'3068'	MM	30	3	34	424	362	362	30	424	5.17745572895092	4.44255764272967	0.187542635572444	0.0502812484390572	102.52434456223	186.370565130125	3.56477346770163	4.55072970029726	0.203650876410637	1.79820399640539	0.944596526124348	1.24183291181554	6.15128887941984	9.62705561823606	3.56477346770163	0.844338895197168	32.3656611448497	3.56477346770163	3.09645255168349	9.69005885661126	0.574005759792561	27.7604094597158	50.0894050427255	110.618613167491	277.853424310799	0.518096834547559	39.4017155874486	192.244610877105	40.4620061748342	66.8535661398756	24.7621128723295
Female	Non-Hispanic White	151	12400400	2016001415509	W	N	60	57	'6063'	FM	NA	1	24	425	725	725	60	425	5.0933318054191	4.34075630989333	-0.284547779894895	0.0137799024600941	57.754919388965	165.192540858495	2.61531673083134	3.07616419889443	0.246823994950809	0.642321952259367	0.822317256808945	0.864827098126443	3.27273971395863	7.08513427449624	2.61531673083134	0.399647918394544	14.6877851589809	2.65172952914045	1.64116612225371	7.10916794471871	0.309915906095809	21.0833364877399	54.2066060411326	73.3766932990944	244.038327168011	0.14297858939615	33.4084010869294	108.142611110255	32.5223294055622	39.8655036647775	15.9559380001648
Female	Non-Hispanic White	224	14500103	2017000443920	W	N	75	72	'7576'	FM	2	2	45	426	905	905	75	426	5.08057663524382	4.30683238480911	0.3380619950024	-0.0285919199794411	104.052375173532	156.332432150275	4.2017973949993	5.3849043286113	0.378602561210894	0.820820358641752	1.43753773247688	1.34290597112879	8.74662118255325	11.4215296073165	4.20179739499925	0.68015422950503	22.0557336802369	4.20179739499925	2.64445845962539	11.4216695056308	0.361519026058662	23.7637773533225	80.0095045438708	118.773863694268	234.15424082843	0.191410019491616	51.1527842292336	166.880722235419	48.4702825225751	66.8241887147659	24.5967169785231
Female	Non-Hispanic Black	130	11701001	2014000171349	B	N	21	23	'28210001'	MFMF	30	1	17	427	259	259	21	427	5.10512329811311	4.32327629571127	0.145223006650324	0.00706668028323112	87.2257253040775	166.033566939942	3.48809336917713	4.74359634530752	0.344721167780308	1.04710675658911	1.25055294462504	1.01415187930062	5.60955607478747	9.48146588150447	3.48809336246657	0.185010313073895	23.0686071420916	3.48809336246657	2.29187183919491	9.48162079793079	0.455271452249107	24.0067060253217	67.5693646806605	107.665710332291	244.969568935315	0.165955945958981	40.4407557131572	137.234872653665	38.545790867345	59.3930032730514	21.3619181852393
Female	Non-Hispanic White	155	12602200	2014000180487	W	N	37	57	'3711081336'	FFMFM	15	2	26	428	451	451	37	428	5.11146237355522	4.32863514287892	0.188290825290964	0.0393207169600107	91.5537258906853	172.566572665399	3.6497012547075	4.68961990263276	0.368235474416663	0.812360952678872	0.628657547350364	1.28695919282445	5.74094389094201	9.91127487745568	3.6497012547075	0.554028658230088	24.1186408374867	3.6497012547075	2.59516068400225	9.9209165997899	0.623366085995608	24.0852657522575	86.9662199146735	112.720617534361	252.163787931236	0.199355955758649	49.3203164602272	153.949003845816	46.6691082895774	57.5003808456511	23.0080623301107
Female	Other	225	14702503	2017000127744	A	N	48	89	'2048'	MF	5	5	47	429	579	579	48	429	5.05963606552331	4.29188503009783	-0.13720347062877	0.0250957082177424	63.7316665703946	161.536605066919	2.69305816084758	3.31881528332393	0.245582271895596	0.658454762460002	0.647859201022357	0.67652588290583	4.66312366157306	7.3202786330975	2.69305816098654	0.268253256325407	17.8619623836647	2.69305816084758	1.57484743262964	7.32049105765565	0.336485116506271	22.6651653116681	56.8027035805418	82.0519223155589	239.976341382856	0.139479425049309	33.078539049157	106.442408699364	36.0546694652041	40.3561528505256	16.1567561142861
Female	Mexican American	92	11207105	2015001235349	W	M	73	32	'8073'	MF	20	2	12	430	885	885	73	430	5.02840963238461	4.21231919323827	0.0399386577708637	-0.0471865721736505	70.2638787521467	145.652414431735	3.13819444844651	4.03080584017887	0.283207085918999	0.476801850272317	0.464295232616218	0.848276154016876	4.50947259755116	8.53049669477964	3.13819444844651	0.483485873668858	16.8238404009631	3.13819444844651	1.97428788029154	8.53049694338258	0.392053836084112	21.3899060132903	60.8118829205171	81.4050569955986	222.051382049228	0.134847716860331	34.6472381016334	126.224752273522	35.1207993731415	45.1752722401156	17.421010360419
Female	Non-Hispanic White	120	11803300	2017001208798	W	N	51	32	'40085951'	FFFF	25	2	18	431	612	612	51	431	5.0958022119532	4.29116069055892	-0.123690893403874	-0.000562103732525644	64.5519158635485	163.243035914015	2.86446112820011	3.6561835013362	0.279429651229648	0.887118962151088	0.898574508996354	0.773723491260707	3.61411416143388	7.78121706641303	2.86446112820011	0.250742891650189	16.4383618509361	2.86854609755926	1.61466664050874	7.78641263311365	0.41883769648633	21.535448370392	56.2024437236758	86.5394476144126	241.875127706923	0.128496654031011	36.221927635338	124.745797607239	36.3103946048053	42.1013998621179	17.321047529873
Female	Other	204	14200900	2014000564092	O	N	27	58	'06020529262728'	MMMMFFF	10	1	42	432	324	324	27	432	5.08981021009511	4.16658723628051	-0.142621102321382	0.00285518687686143	55.9224625492175	162.823272849406	2.26848774182271	2.95512606081269	0.209296832838948	0.439443845554423	0.576561900875652	0.854998206149154	4.50970269868845	6.16637598568546	2.26848773848257	0.326830732467845	14.9310891825649	4.34403134440769	1.37121156345102	6.16638899758919	0.303549211216413	23.651868996529	46.5664525818728	71.6715885876111	241.408509420611	0.109592900284184	27.5714379233036	91.6781280515372	29.438684490174	35.0227635622567	13.6908060896277
Female	Other Hispanic	228	14703100	2014000360857	W	O	8	64	'04293408'	FFMF	4	4	47	433	107	107	8	433	4.898071456674	3.52540139689127	0.424942708625989	0.0262407925384538	51.9532411562503	137.594678245851	2.86774964250771	3.85672658894984	0.246197676717208	0.430432821418577	0.503918155309688	0.810886373540655	2.94749010669348	7.7935194986732	2.86779584569339	0.187226591348692	7.04225828176919	2.87653668225454	1.51656043846517	7.79535174179864	0.340363297213177	17.1163796121404	49.3987001877877	76.979382471759	212.772963359788	0.124282064292529	29.3650709714071	113.822185378376	28.8818728388206	40.4364052850037	15.2544897402585
Male	Non-Hispanic White	274	14803502	2014000291678	W	N	22	26	'04252201'	FFMF	25	1	48	434	267	267	22	434	5.18809343886355	4.38597863552693	-0.0196847703792558	0.000780208034126985	78.7512275206191	179.26652177104	2.88579294879442	4.10053479772207	0.161043250585635	1.14757714605308	1.08239306556127	1.13790145916	3.5794706675675	7.7303760326073	2.88579294879442	0.597982749488759	26.4374626145635	2.88579294879444	2.03713108866013	7.84439849490587	0.670576715434662	26.2892854470099	39.3442651332799	102.529707752523	269.871582664772	0.355290072387282	30.4577866623582	151.360549596058	31.3741985379201	46.5274208322844	19.4698377583497
Male	Non-Hispanic White	189	14200300	2014001284312	W	N	64	29	'6457'	MF	NA	3	42	435	776	776	64	435	5.17277118127331	4.4688636476849	-0.12110729312817	-0.0423261878057456	77.3048235903591	169.092346295123	2.86273853873652	3.82281308719187	0.163296474298455	0.662764807049489	1.03371515455239	0.775765921644087	6.01047137748489	7.78061081240258	2.86273853873652	0.404264254575944	25.2785420505864	2.86273853873652	1.59230136492458	7.78173014567465	0.146329592077224	26.003801620136	36.3180803589613	91.1133559038343	258.300784179568	0.370754105875729	28.7079389072568	135.304254936861	30.7170017203087	47.768602453791	18.4861902364178
Female	Non-Hispanic Black	191	13700300	2015001077282	B	N	26	31	'73722611'	MFFM	NA	2	37	436	317	317	26	436	5.11171604549579	4.41160348646826	0.807931651300068	0.0404931866079041	160	172.812852604745	5.70965402409161	7.32284642269612	0.556445487119225	2.48084959276927	1.24793406874267	1.65667182485184	6.49148600362589	15.5204486391762	5.70965402409161	0.510036440393582	38.0384843740643	5.70965402409161	4.0518815593611	15.5204487804762	0.827252449188262	27.0227136924387	122.073595237671	156.227172207184	252.433648176406	0.287716409069337	66.2913954728651	227.862141536872	66.6130942817994	102.354893259274	36.0327198781635
Female	Other	188	13900801	2016001219157	A	N	66	31	'6766'	MF	10	2	39	437	799	799	66	437	5.02916073787501	4.08730584981843	-0.328629996267972	-0.0478055833738045	42.8915936084845	145.671655554835	1.85389009958949	2.42653485612259	0.164400710064907	0.333898942190112	0.621869655935808	0.527145927273073	2.91907479050589	5.03620310479083	1.85389009956949	0.138887425028985	10.2245702326598	5.03936740219572	0.847115072348496	5.03939576958506	0.274193177944695	22.1359957693147	36.2348173237564	54.864560058464	222.073381928763	0.0819865667504774	18.5683922169551	69.5043747892302	21.4581996085775	26.0163302888265	10.2924911033912
Female	Non-Hispanic White	119	11703520	2014001062178	W	N	15	61	'2052155313'	FFFMM	20	2	17	438	184	184	15	438	5.09790721420418	4.11577434372743	-0.0742526281870482	0.0153138879892973	56.9128821618615	166.204856397079	2.59322471728048	3.07110370901344	0.256361465863763	0.743151348639989	0.462261434403053	0.735971334511426	2.49059602408192	7.00905276346156	2.59322471728045	0.384177896420899	15.6204087047024	2.59322471728045	1.50303405678557	7.04911558753055	0.27811800789599	20.9467606423043	53.9674913384929	76.784623373117	245.159087671427	0.125437554902005	34.3725046890045	121.078780922233	31.4786925204898	41.1650973686481	15.8938151453867
Male	Non-Hispanic Black	187	13401503	2016000681665	B	N	25	58	'59782325'	FFMM	NA	2	34	439	306	306	25	439	5.18085842714625	4.45441595837098	-0.0870216556457873	-0.0246416362373648	78.8379360305594	173.506799862309	2.82773203720942	3.84261047190368	0.154438178655625	0.76452735750407	1.21963743566219	1.23762318979887	5.80347393635191	7.68500288880401	2.82773203720942	0.417060718890719	26.0581658652252	2.82773203720942	1.75958821016988	7.68657260850293	0.420476819581942	26.8802711831075	36.4640560165154	90.5406228128511	263.342004334589	0.374540212389679	31.4512300023003	137.800249048398	26.9574730607153	47.1125341130218	18.6165155599964
Female	Non-Hispanic White	57	10607701	2015001342644	W	N	62	75	'54296462'	FFMF	NA	2	06	440	755	755	62	440	5.08724306526914	4.35098362927867	-0.178897816755807	-0.0346690744757139	64.8505772817323	156.424582175149	2.95436447224667	3.4958983616597	0.24589968198511	0.664040403990888	0.535319591390111	0.769281316326555	3.54765051462951	8.03079490845701	2.95436447224668	0.144234489597908	16.5344580321609	2.95436457878976	1.68055918018747	8.03079524119758	0.349352212905341	20.9507707633703	65.6884073428492	73.402293837744	234.257749723075	0.142087069743126	36.8742300438393	116.176949053697	36.1133613870133	44.9608100480461	17.3020693282577
Female	Non-Hispanic White	9	10500200	2017001086637	W	N	59	26	'5559'	MF	30	2	05	441	718	718	59	441	5.09195410329845	4.32782677349658	0.0410949173303232	-0.00490007703322551	78.9584441639328	161.912169765035	3.52345305555295	4.69481162165764	0.31086655777162	0.564442828860525	0.854434773328244	1.16223607045379	2.23353307636687	9.57772710882933	3.5234529557524	0.282228823824109	19.9572780867156	3.5234529557524	2.13787991650278	9.57773811436723	0.435756179306856	21.4093936134509	73.3948935039293	103.762789586265	240.3946698246	0.17500650694542	38.5793760025985	139.185598306228	39.7867756826927	60.1488670762419	21.1754827485153
Female	Non-Hispanic White	261	15159307	2016000849416	W	N	73	28	'7473'	MF	30	2	51	442	886	886	73	442	5.07619379241459	4.32283754389313	-0.0131090910324819	-0.0183794732557827	74.4202775828142	157.246449897755	3.34907748453992	4.36335339454616	0.3062016409433	0.739123504379323	1.0169778013371	0.911774783879171	2.88607460014899	9.10371114089371	3.34907748453989	0.293568407351643	17.9857530236805	3.34907748453989	2.23903170689512	9.10373646614358	0.360415200302882	21.2211274377363	63.390628560436	96.7611478834783	235.180252014206	0.168835394813396	39.9358170763945	140.103053822047	36.8737618360248	52.8558901718906	19.6909221707298
Female	Non-Hispanic White	55	10603721	2014000201431	W	N	22	73	'592254'	MFF	NA	1	06	443	272	272	22	443	5.09903423593235	4.25360873690669	0.113751369042423	0.0366613785718154	78.8352400734118	169.982521065793	3.26512244271046	3.98238808741586	0.313683544854417	0.637889536456357	0.44970466603146	0.881975714850568	5.05478375453325	8.87503575653132	3.26512244271341	0.40999143975411	21.6820225239971	3.26512244271046	1.97107521688915	8.87552300371052	0.542561610455178	23.1446504554263	69.1400214132411	90.6147573767122	249.326484783632	0.162209309383644	41.5924704368022	128.746614039782	40.4774671218487	56.7981306201659	20.3520375257286
Male	Other Hispanic	47	10607102	2018HU0652080	O	O	16	15	'501650'	MMF	NA	2	06	444	196	196	16	444	5.15059368768024	4.22522019890734	0.146626512012797	0.0561907160506225	79.1897373032754	182.506247211191	3.09700344600282	4.41427764658892	0.167152207506299	0.923899009395936	1.24542072027	1.01441914984407	4.80315990241598	8.14914940285413	3.09700344600282	0.324377507635944	23.4605225510171	3.09700344600282	1.81700352837404	8.41852818724362	0.53702190825172	24.5697930867601	41.9557606127755	105.535783131695	273.521244078232	0.399682280014333	33.7092784674613	161.195734852051	32.568980744044	54.6451636009536	21.1774058866315
Female	Other	261	15500700	2016000337084	A	N	81	27	'8681'	MF	NA	1	55	445	978	978	81	445	5.16260025138853	4.15534733647959	-0.321187793045802	0.00625882628964029	46.2545363981953	175.71424677021	1.98555742898261	2.59102866029656	0.186599535898042	0.567979553830367	0.27743858342988	0.618382925863455	3.17160839352835	5.39728555207716	1.98555742898261	0.221499212344441	10.3070697582716	5.39730467225981	1.60190424072215	5.39730467856506	0.245929540750235	22.2954915949502	41.6525552343455	63.5906209653408	255.605647892253	0.10257788493485	24.24265815177	87.3514770371115	24.3165037151349	32.8323605628407	12.6879923265594
Female	Non-Hispanic White	152	12601100	2018HU0515142	W	N	63	15	'6663'	MF	NA	2	26	446	765	765	63	446	5.08772102998577	4.31812931223001	-0.250430380648415	-0.0324371724006072	58.4223739228483	156.849046817364	2.68098552508952	3.08481915066704	0.234686370507355	0.838942768347899	0.528866768855603	0.846182658447145	3.09221816013036	7.28762973350549	2.68098552506655	0.433323535689224	14.8545786583878	2.68098552506654	1.3959038390663	7.28767421445467	0.452017639622729	20.7913798402169	55.892528746684	71.7941314712725	234.734339341926	0.123987662386396	33.3194765177308	107.245029065226	32.081613714717	40.359914767714	15.732984150294
Female	Other	151	12400804	2017000487204	O	N	22	22	'232522'	FFF	NA	0	24	447	271	271	22	447	5.07583530044031	4.06104804762025	0.385036428225523	-0.0214029708022764	85.2923251662867	156.715542319992	3.58051500628106	4.50821503674977	0.327989958290614	0.661505776564989	0.883349195521284	1.06935290244023	3.17120465317797	9.73025026715555	3.58051500628106	0.377811000887984	23.7199644915842	3.58051500628106	1.97881733461603	9.73284887737335	0.455604488411324	22.8212449931543	69.7328031442288	101.547189332182	234.584475064553	0.173096235672401	40.9454569567494	142.844821730834	42.2882182099167	54.8704232498328	20.99833083023
Male	Non-Hispanic White	146	12600600	2017000681309	W	N	31	76	'31'	M	NA	4	26	448	381	381	31	448	5.17819025204568	4.45170593949479	0.277029006884004	0.0192217436924315	113.152328005909	180.803715076799	3.91773018582806	5.52460384744507	0.231354635781165	1.72843142151953	1.08799527048968	0.906707996134721	5.21568417898717	10.6489384990056	3.91773018582806	0.625393319937634	36.1702875850288	3.91773018582806	3.04332466039982	10.6494944659743	0.814077703695958	27.8821135297229	51.2483636088364	111.821949393168	271.605321250489	0.547093735208215	44.5545437758	193.317481459037	47.7569088358674	68.1363344097685	26.6019091423643
Female	Mexican American	261	15502400	2014000553622	O	M	22	44	'224348'	FMF	15	6	55	449	275	275	22	449	5.0688093286627	4.29036558224389	0.05303937408434	0.0302843638068994	76.9691703280623	163.873320353071	3.16130457276529	4.34600472015176	0.283345942280886	0.211955992330216	0.921141306269824	1.04620610090763	5.38381144493279	8.58886596418167	3.16130457276529	0.585939172292873	20.7670304211837	3.16130457276529	1.76289021723565	8.59331675329328	0.39726346629831	23.3472808634617	69.9911805683554	91.0374394677393	242.575203531795	0.157123394042846	38.8418994419869	126.340756140416	37.5426681881373	51.70894720207	19.1713525041134
Female	Other	263	14949004	2015000322241	A	N	24	16	'00280224'	FMMF	NA	2	49	450	291	291	24	450	5.09003404155305	4.21373026663269	-0.101284185608314	0.00316231722153905	61.0959806593488	162.909748743532	2.52720952444893	3.47444697800672	0.248162062473031	0.558088864073927	0.753743412975958	0.721715134866887	3.4398634370116	6.86966740590306	2.52720952444893	0.288146509121599	16.8991626966939	4.38861272970879	1.34285665906505	6.86966772701815	0.403308290373915	23.1752731889813	52.343748906814	77.5078026544932	241.504662587459	0.127961834168169	31.526754389495	109.347034492224	29.1023812650996	39.4170105366357	15.2583220872463
Male	Non-Hispanic Black	154	12500701	2016000853130	B	N	45	146	'441445'	FFM	NA	1	25	451	549	549	45	451	5.18228036713864	4.47647434811858	-0.338078107984803	-0.0162030749421914	62.7021815273803	175.226126667089	2.36073296201596	3.31097756942164	0.124729616114669	0.818660672847236	0.575004881314809	0.447360099426615	4.35909438530094	6.41053784906857	2.36073296201596	0.305077464973623	21.7747133396036	2.36073296201596	1.37417535833932	6.41713751247352	0.384694914441398	25.5604719111384	34.2789007078477	72.437707755517	265.296736545059	0.318938995931889	24.2397737795984	121.359114415636	25.6622004797209	42.3998102684038	15.6573687669297
Female	Non-Hispanic Black	259	14802301	2018HU0129305	B	N	72	17	'7872'	MF	10	1	48	452	872	872	72	452	5.06265678943678	4.32595324390129	-0.0205639639553685	0.0127401311976582	74.098054725946	160.035700846476	3.31313019542936	4.13999409728616	0.300547518714303	0.629012331222664	0.98406409563466	0.972935872769728	3.77087251666983	9.00601030285993	3.31313019542936	0.565133489584999	17.7849430092579	3.31313019542936	1.67088952678944	9.00602160555455	0.476773958734317	21.3649691847813	69.1521885652414	89.7783473206927	238.302101094837	0.163849822537547	41.9523862973301	140.062811683173	41.0079860718704	53.1374903089854	19.7381471692891
Female	Non-Hispanic White	261	15311603	2017000097310	W	N	22	11	'2222'	FF	20	4	53	453	269	269	22	453	5.10378894195783	4.24327344733136	0.229317740074141	-0.0148062783309288	87.5833741749011	162.224740946295	3.58137780049722	4.92615412257876	0.318488529779313	0.77730643390626	1.46968781610375	1.11810697622622	3.98886330398381	9.71568979723284	3.58137779817023	0.351814830756891	24.044893752981	3.58137779817023	1.60392518186869	9.73519418948401	0.465287912326745	23.4552178269627	81.3140779731008	103.31555785047	240.742647040953	0.170292517264783	42.1921766581051	140.772652747723	41.8354689089056	55.6780805496758	21.55475927963
Female	Non-Hispanic White	189	13903700	2014000111809	W	N	22	14	'222167'	FMF	NA	2	39	454	265	265	22	454	5.10738786845997	4.22446343468125	0.318626026372213	0.0603979713614144	93.9807017868792	175.52576474971	3.7377872276135	4.81302019802976	0.362140964635301	0.877978607729386	1.54916775704961	1.48522358745778	4.60426689767249	10.1603523176909	3.7377872276135	0.593661650055148	24.5885773787113	3.7377872276135	2.77588810617822	10.1603590784609	0.548762594040375	24.1434059950181	80.8587202342713	120.373673622241	255.399986431435	0.193059689062471	47.2364908374154	156.346888446908	49.1918445732768	63.4419058156531	23.865770180402
Female	Non-Hispanic Black	172	12401300	2015000187542	B	N	6	43	'040634'	MFF	NA	1	24	455	83	83	6	455	4.81075190762783	3.26329712343544	0.207755287175049	-0.000836717514435201	32.1705812965485	122.721209104075	2.05751239001231	2.24444896342773	0.127107723560651	0.38274050019514	0.200925745675285	0.365782319164388	1.99038616793481	4.63112431719788	1.7047683602777	0.109402998116639	3.92443573545996	4.6339911850667	0.710684130116522	4.6339911850667	0.170917295939818	17.8711418757858	26.784446435057	39.9109355680475	195.278726213418	0.0692239119114048	15.3593049980916	58.6925751526513	18.2549886006969	22.4878218226793	8.32253564025236
Male	Other	127	11700501	2018HU0388466	O	N	21	19	'1921'	MM	10	0	17	456	262	262	21	456	5.16880922412749	4.29262412045285	-0.204089187619096	-0.0404573475199585	59.6524328324983	168.738786404356	2.22694676755861	3.38132550037672	0.122288991057652	0.520975150883021	0.588027679972092	0.791097038980668	4.37772786930258	6.05346712385905	2.22694676755861	0.190856268092385	20.5101000046053	2.22694676755869	1.48796318419355	6.053468931192	0.423736773498839	25.7866451508817	27.645455970819	67.9186911282486	257.895611995305	0.278872381409145	21.3600061335525	108.313865634628	22.1618909448167	39.0077212246765	14.3579949875123
Female	Non-Hispanic White	181	13603212	2018HU1074477	W	N	62	31	'62'	F	20	1	36	457	754	754	62	457	5.0876282937823	4.35409841040638	-0.36398802271349	0.00113015794373355	54.0608566872064	162.188372306053	2.44534997379851	3.14914361266325	0.233547890611472	0.951706242833823	0.570521598493674	0.748817471364791	3.27881733889831	6.64035078727365	2.44534997379851	0.332759875168962	13.7994555178668	2.44534997379869	1.31772008740663	6.64715039799178	0.39617339069314	21.1076153787562	45.9683766086888	72.1366436555914	240.702167419669	0.125553442534583	29.9354292521234	103.233824533318	29.6058252194445	37.8745690849046	14.7150259698233
Female	Non-Hispanic White	189	14100100	2016000732932	W	N	82	33	'9082'	MF	NA	3	41	458	985	985	82	458	5.02956367939247	4.04196587557218	-0.114972585738678	-0.0718414144919461	50.7541450187775	142.269374616236	2.48063126130806	2.76730147266721	0.213954639104283	0.401386886140252	0.398349350031	0.646471120493024	2.34361786589839	6.74300063598626	2.48061130784821	0.244622944166443	12.8324786958156	2.48061198407957	1.25605993987242	6.74300064148705	0.324073581520719	19.4603376830115	48.8451044164764	64.4716899963145	218.171883661107	0.113198379332046	26.148115953325	90.0011326894591	25.3337090549668	32.8312356767181	13.5299910415821
Female	Non-Hispanic White	47	10607101	2016000100779	W	N	0	27	'28052400'	MFFF	20	2	06	459	5	5	0	459	4.15702567020436	1.96046659543633	0.410544690062491	0.00888336917664946	10.7082158737503	64.4512445412461	1.79482868324199	0.236052920749728	0.0321080361063765	0.0776910298973793	0.0413435877704969	0.0835871675790475	0.232274137272551	1.7948286828723	1.7511195009421	0.0113981448055417	0.517000258932683	1.79482868324199	0.173611214273739	1.79482868324199	0.0404050779200774	16.2176752002061	6.52986174652429	9.52486549667057	120.472714323604	0.0143303973857067	4.12738672088199	13.5715667120905	3.77612223248852	4.80830827349634	1.98864482107987
Female	Other Hispanic	199	13603211	2018HU1345958	W	O	61	41	'615927'	FMF	20	2	36	460	733	733	61	460	5.04608208581827	4.26765037710208	-0.253010918425017	-0.0404490446370979	55.4033166160534	149.251535627488	2.42748694856464	2.92672077736879	0.193172706681678	0.340000653655167	0.648231115330296	0.603108369957759	2.43353197870279	6.59740930679108	2.42748694856464	0.322171055886765	13.5777353943654	5.75484365722878	1.4505283264931	6.59859365219593	0.353739859976645	21.8233221392778	45.8489925785068	63.3154790927739	226.154024503446	0.0980298037058018	28.7033913082975	99.7984590122528	27.7264813076769	38.2901803858609	13.7246485711871
Female	Mexican American	80	11210302	2016000182375	W	M	35	23	'3635'	MF	NA	2	12	461	431	431	35	461	5.04395199958419	4.20079178121083	0.264810038869924	0.00669437334633972	86.9733561047787	156.123345783951	3.61128617469466	4.70338951861242	0.32605831877263	0.782480821369031	1.12066813842172	1.09121368308398	2.75614947876206	9.81501944767368	3.61128617469466	0.380973673754205	24.1050284454694	3.61128617469517	2.32230300365254	9.81649358603786	0.546406402394781	23.083761822651	66.2745287767653	100.108809588165	233.919324847541	0.171776059890964	37.6609082389404	124.518570658437	38.3920890039226	58.2793089184623	21.1187405953958
Male	Non-Hispanic White	79	10900904	2016000857087	W	N	57	70	'575320'	MFF	NA	1	09	462	690	690	57	462	5.17903152524274	4.49560113681895	-0.461086063690768	-0.0522772142254554	56.515507703963	168.469430339735	2.22733278558797	2.99745365830015	0.117748887633016	0.713209480991582	0.748538943686168	0.731554074813588	2.22104051972551	6.0474438653532	2.22733278558797	0.407646881155539	19.8262782381538	2.22733278558797	1.61242459282052	6.05451823699484	0.212013551432484	24.3736253826314	30.6118411346757	69.7849661741602	257.586793174922	0.283434394253968	24.4176763036242	111.339196819536	21.8994101747067	39.0487655778994	14.3432877393243
Female	Non-Hispanic White	167	12701405	2015001002378	W	N	9	30	'47510709'	FMFF	10	2	27	463	109	109	9	463	4.91356217759273	3.50810018287935	0.49152568295337	0.0218075504539862	54.5777268204955	139.124571280158	2.76980389124725	3.5193462217512	0.233240758382654	0.502005894793586	0.515654526436555	0.704505179283049	2.29215363693555	7.49552959042046	2.76980389124682	0.238442016861238	7.34968190291381	6.5965439115991	1.8833538863624	7.52910758597131	0.303778829105	18.7045455069245	50.1319630051211	67.7210289165344	214.544849832658	0.114184269942043	31.2902465448591	96.0140111447119	29.6718720377125	38.6390760501824	14.8561789978364
Female	Other	180	12900400	2014000964325	N	N	42	6	'4308134220'	MMMFM	NA	3	29	464	505	505	42	464	5.07615699519929	4.10251651732485	-0.0627589840155034	-0.0103485063295771	56.8125659804652	158.508542675257	2.27604819223505	2.85331479147941	0.212014302463416	0.602785291706311	0.339296084095692	0.67183414342368	3.58356865897784	6.18693513123682	2.27604819223519	0.213673248668238	15.0952550969829	6.18686283525011	1.39774650140543	6.18694044162108	0.376712385933538	23.9610558222301	42.4586824887786	61.0911919866972	236.594540686842	0.107435192111321	26.1119455194805	94.39971349682	25.8518990755641	35.8955189270914	13.4625144155742
Male	Other	188	13703400	2017000425119	O	N	50	18	'5850'	FM	10	1	37	465	604	604	50	465	5.14721692831558	4.39884890349071	-0.0977292476136765	0.0124050024418139	73.7823583201033	174.098621826938	2.71217071689577	3.89412147604362	0.157302250477343	0.982787789237555	0.712277247085563	0.659975805557605	6.37116541069852	7.29735375600171	2.71217071689577	0.435844184482542	23.8985840630205	2.71217071689577	1.61360098592137	7.37244437246742	0.133031583539558	26.2041718688532	32.7547240701881	84.444720150692	264.015401111973	0.34975148941495	28.0922987927512	138.372636835459	29.484332684294	46.6417641547212	17.9013709926346
Female	Other	12	10600101	2015000733556	A	N	8	14	'08054342'	FMMF	5	2	06	466	102	102	8	466	4.87456513886737	3.38199040500274	-0.324263154169488	-0.0353189754571564	21.2791400151144	126.374050430611	1.1715377895929	1.50906178657186	0.0965777810411535	0.274106557815963	0.103266513984156	0.305392883969126	1.17028880677822	3.15289246852404	1.1598979764979	0.0701526053708033	2.84537724997997	3.15292953564364	0.66968780562604	3.15292953564364	0.111727041558425	17.3341653876802	20.0018663143226	27.8874759987022	199.622110774056	0.0450163692526944	11.1749534136708	40.1262112119223	11.2448629690527	14.1834556988607	5.78853195461195
Female	Non-Hispanic White	151	12500303	2015000070912	W	N	66	68	'666161'	FFM	NA	1	25	467	802	802	66	467	5.08896640692703	4.31162526335796	0.212168463310482	0.0326598591143947	92.1846588374135	167.607722849626	3.96603861573749	4.74410058542577	0.366658418343733	0.828763335455112	0.826593852183282	1.27241686256449	4.12440680255939	10.7807559864728	3.9660386157375	0.551651369255133	21.7114156817516	3.96603861573749	2.5780214007166	10.7808106963773	0.571337297153239	22.2435101543437	81.5179666269869	109.486312664554	246.709420814447	0.199042264586123	52.3634718646971	180.627938134557	49.5303206214994	64.8234334552075	24.4614772454082
Male	Non-Hispanic White	81	11304100	2017000378234	W	N	31	45	'3131'	MF	15	1	13	468	377	377	31	468	5.17778052249867	4.43872933572222	-0.223177070159888	-0.0464451559474822	67.7315613526811	169.242968613989	2.50192846584596	3.82444189255836	0.140227985651477	0.681483569023739	0.890754873190246	0.569224924424494	4.84769790591707	6.77776157539846	2.50192846584578	0.323821289878678	22.9627068749929	2.50250612407897	1.62935675372793	6.80094668155484	0.310247999677179	26.0717417693173	31.6208956361045	85.3391593081285	258.473329833693	0.32387461261881	22.8905828958129	119.773991511822	25.5067725038862	39.6597530057961	16.1670445393215
Female	Non-Hispanic White	155	12602703	2016001275605	W	N	44	15	'49172344'	MMFF	NA	1	26	469	531	531	44	469	5.10830975207982	4.29964619724675	0.216615424541513	0.00287302300559755	91.4929227035908	165.866421570412	3.55903243370649	4.4765953460682	0.317294335540148	1.13816520463329	0.880803018556119	0.929764238442333	7.16478844890095	9.67322863757062	3.55903243370651	0.347860073369611	23.6308746995469	3.55903243370649	3.17688191058749	9.67445319143508	0.541648734350036	24.7072461147276	79.427338700234	110.721909171486	244.784588190888	0.177977818073576	42.3193282981816	152.258514328682	40.0599489247603	55.3338354326169	21.7799072160715
Male	Non-Hispanic White	157	12200700	2015000323079	W	N	87	27	'87'	M	NA	1	22	470	1055	1055	87	470	5.034692455887	3.97838821570518	-0.245186967897362	0.00358767050429695	41.8127471092338	154.204574451262	1.65104587644205	2.03877315933506	0.0850255818401726	0.320082582037676	0.530552451478089	0.353508039012164	2.22915226446409	4.48800735458708	1.65104587307154	0.229773266872386	14.4928662903328	3.02326278934931	1.01308846769133	4.48800799472265	0.322875357756857	24.3250062830979	18.6062132976392	53.1117676793285	241.049205708751	0.209631820381032	16.1447792773461	70.7537684202847	16.2269183085652	23.3693687828843	9.94958240731515
Male	Non-Hispanic White	85	10800818	2016000044171	W	N	82	44	'82'	M	15	1	08	471	993	993	82	471	5.10537271816969	4.23773839442293	0.194995658412672	-0.0397770304134272	84.1612038203056	158.474815469604	3.12536848296373	3.86930480530867	0.157124336801284	1.1198276886775	0.686516858583627	0.833666324594578	6.13656186820206	8.49562170731948	3.12536848296373	0.305809513087101	27.4107895615195	3.12536848296384	1.31305334807478	8.49563235117749	0.473187151415807	25.9284099711971	38.3544919565641	87.6302196055032	246.038433320459	0.398888916861179	30.1257306540811	144.290967733979	32.701861335642	46.8864392670473	19.2240191274384
Male	Mexican American	260	15151110	2016000531844	O	M	70	86	'7170'	FM	NA	2	51	472	850	850	70	472	5.100144275324	4.39730513952769	0.217703475399631	0.0741584996793657	100.988698539032	176.673390220076	3.62198264824861	4.89069781888348	0.191459490583653	1.20369522449904	0.869885899240905	0.91583709945557	6.16650194036594	9.84555028618836	3.62198264824861	0.571813340445704	32.3166810224102	3.62198264824861	2.14947418089151	9.84556961552684	0.341974279999768	26.8821596751338	47.0800922349445	127.506299612508	266.938440575396	0.475120602203464	38.525421893368	182.283720806758	37.7304422470741	67.2318692011756	24.1711599978657
Female	Mexican American	166	12500703	2014001304017	W	M	37	19	'370238000405'	FMMMMM	10	1	25	473	452	452	37	473	5.06468525464237	4.31971667795586	0.335099847041114	0.00224769574526299	105.089936853484	158.686879679515	4.15057853321174	4.84416383943426	0.376874278793095	1.15407016815596	1.28364384969598	1.16600649329615	5.68402337758605	11.2718302733358	4.15057853321174	0.395673904265407	27.611000145649	4.15057853321174	2.31773455291234	11.2824422044176	0.599509942944794	24.3193466916923	76.1375149020084	110.403835833843	236.794155939652	0.202970241449781	47.1447478421588	155.860643729525	47.5056376034712	60.6643689342143	24.5708185108278
Male	Non-Hispanic White	263	15110701	2015000559622	W	N	37	13	'0634371008'	MFMMF	NA	2	51	474	452	452	37	474	5.18700188911864	4.5298985611755	-0.0659791379386819	0.030727545179461	86.8271554232288	184.514755205817	3.02210549918602	4.31232959320574	0.169907410492822	1.27244484288864	0.819442801376362	0.856163497705369	7.35185784897937	8.2148208407974	3.02210549918602	0.432054614861598	27.8664194883169	3.02210549918602	2.39633689027123	8.2149344620145	0.499182413063517	27.7306831103729	43.8416964017111	97.2136152521189	275.775758600207	0.421010415567569	34.325011654459	178.090939969904	33.0764354943272	53.292758882844	20.835585915197
Male	Mexican American	154	12202100	2017001253881	W	M	17	26	'174848'	MFM	NA	1	22	475	215	215	17	475	5.13416925281993	4.32498454144227	0.225354069324695	-0.0200960990322952	94.6644572930414	166.346531858759	3.5331248682829	5.16675562455011	0.175817514558185	1.25632621653623	0.792055215912825	1.20191117109459	6.22629278930135	8.62314812062723	3.5331248682829	0.433551995591593	28.6924176829338	3.5331248682829	2.0091396850391	9.60402896921887	0.630829468932138	25.7934083346022	44.3837844709424	104.581695925537	255.148532573497	0.436189619308393	34.8989251373024	171.174917582068	35.2193987519528	60.7696617342532	22.5367906385328
Male	Non-Hispanic White	12	10400400	2014001194550	W	N	29	12	'09282905'	FFMF	20	2	04	476	358	358	29	476	5.18302864292656	4.45743168284114	0.467551012490289	0.0329670232110741	137.686958995051	184.195126559156	4.5999024380842	6.67437276815764	0.280450982372319	1.73887365996182	2.29416876956606	1.70926055123778	5.73694064843435	12.5038288991334	4.5999024380842	0.508449515389699	42.1114088730833	4.5999024380842	2.79817193457086	12.5038312084037	0.660302248837942	28.9325824511174	67.5172099038301	147.036647217	275.417393224364	0.62176224187746	55.193463081335	243.655365188835	48.1078591286574	80.011328454658	31.6723284645886
Male	Non-Hispanic White	151	12300100	2018HU0045571	W	N	55	21	'222855'	MMM	NA	2	23	477	660	660	55	477	5.17319069974274	4.49134395244008	-0.0401981258092911	-0.0263476194343955	85.7251138670336	171.887996284496	3.10219144760571	4.17743405724685	0.175439909938079	0.876588014084271	1.39318382036157	1.00879063248925	5.64727413603853	8.43262680574658	3.10219144760571	0.388916340891542	27.6087724551463	3.10219144760571	2.09273471205645	8.43263064042749	0.582977943266978	26.6337277421085	41.8951763088513	102.348926049296	261.49712813081	0.370460400461142	32.7875641509249	168.043744097367	32.1500175948977	50.853111318406	20.2803538615213
Male	Non-Hispanic White	74	11205704	2018HU0456428	W	N	72	48	'72'	M	NA	2	12	478	872	872	72	478	5.15553121162636	4.46552524608314	-0.00813177204835516	-0.061868909388904	86.2623707002058	162.985673162866	3.10846439157952	4.07112918929717	0.151122339313646	0.895416090966377	0.952418450663413	0.92518975330306	6.60282933085975	8.44920987376083	3.10846439157952	0.405645718810982	27.6478576098328	3.10846439157952	2.19850908201133	8.449682262118	0.476758573173783	26.7507990549549	38.9543213519213	102.538057224529	251.272427130386	0.381493011585353	32.9755128643488	143.557457012445	32.1181883892834	51.2066276730631	19.5267848080141
Male	Mexican American	228	14701800	2016000382634	O	M	67	12	'105167'	FFM	NA	2	47	479	810	810	67	479	5.13056706614377	4.43820188687299	-0.320669651819167	-0.00567853898480184	61.4075158138627	168.155395847332	2.32187786620787	2.72601181253804	0.126259527289587	0.817010663505659	0.832721324274675	0.883683274777877	4.8510753483692	6.30580027892455	2.32187786611314	0.362362288418172	20.3770537616679	2.32187786611314	1.53302236338757	6.31151841135662	0.292189961089131	25.4473496690245	29.6165301262496	69.8796011078664	257.226594293056	0.309757652523336	24.116374866011	104.240567697205	22.1603863648663	39.1206510945229	14.9312183966178
Male	Non-Hispanic White	146	12601300	2015000347681	W	N	48	12	'48'	M	NA	2	26	480	577	577	48	480	5.18642938124512	4.46102738025378	-0.114488741939206	0.0190703187326911	77.2107455428843	182.271931295939	2.83246211318085	3.7326224564175	0.171148555873002	0.748262171539851	0.806310268161328	0.810474542875714	4.76092303966249	7.69938563417651	2.83246211318085	0.598818418576096	26.1232483202723	2.83246211318085	1.81546220484617	7.69943029205662	0.636075146111913	26.2592332951549	33.781620507309	94.75460679476	273.257825677485	0.411474591722811	31.3914606249875	158.324451995552	29.8327880171599	48.057644538835	19.3498109590413
Female	Non-Hispanic White	3	10600102	2014000450210	W	N	43	35	'43'	F	3	2	06	481	517	517	43	481	5.1050926130876	4.28015330432617	0.0118308359258799	-0.0449563669074599	73.1113879295266	157.611988891987	3.09812060585475	4.35435237480913	0.281998713515684	0.765290242998672	0.687988139806551	0.900268333853382	3.21089977287692	8.42020248094607	3.09812060585475	0.289117182397913	20.6546915796172	3.09812060585475	1.78979628979766	8.42156494526412	0.296864269270364	22.5986254993955	64.9853658181675	91.9476595133743	235.59016236536	0.142374210026275	34.3366296027217	125.588516475912	33.7097262444678	50.999888053302	18.2471684140197
Female	Non-Hispanic White	45	10608513	2014000158764	W	N	78	23	'785557'	FFM	60	2	06	482	937	937	78	482	5.06834182910175	4.25563170464532	0.199835815472702	0.0592817162381366	86.0963932332677	168.615933414421	3.79308965006969	4.58429734759607	0.325895473491678	0.837131873421579	1.03484304257352	1.01959819204357	4.20168008357609	10.310684226915	3.79308965078733	0.422485581406478	19.6088801476813	3.79308965006969	2.27209741359026	10.3106866637108	0.646901696437457	21.6982226037515	80.9845655681124	109.273586046198	247.821609205126	0.184418046632342	48.7190873357599	150.225403709047	48.919094432237	62.9582273883796	23.5002395234895
Male	Non-Hispanic White	187	13602902	2016000609786	W	N	67	6	'6667'	FM	NA	2	36	483	807	807	67	483	5.16377673313757	4.46822490832328	0.232815943008549	0.0449382515227023	110.061670690486	182.858930623947	3.93549527164374	5.11332025692458	0.217140146635096	1.22493815133971	1.24138487306415	1.22778698166003	5.81889615808948	10.6966390149221	3.93549527164374	0.358560024522893	34.1214628626082	3.93549527164374	2.77702637419565	10.6977852825213	0.466831801622013	26.9664090777872	57.6607533598031	140.310438659271	273.917572110946	0.566518935331015	43.6090428613626	210.850243052328	38.0364990368245	64.6969594397649	26.950032746569
Male	Non-Hispanic White	58	10603724	2015000891128	W	N	46	34	'461647'	MMF	15	2	06	484	555	555	46	484	5.18205906813502	4.52887079954821	-0.0188089229442858	-0.0144617646112987	90.927444617942	175.492674891299	3.24606870468072	4.34315727388435	0.184923981305198	0.99747641496865	0.636443343330446	1.32745778177687	5.01864093741838	8.82337829107669	3.24606870468072	0.275639103989768	30.2389091259634	3.24606870468072	2.8682028376295	8.82372957238207	0.532844714061891	27.0115588702197	44.3403584785092	109.60959857812	265.599349536456	0.43751017375915	35.4875968282982	161.298490705952	34.7201496900949	57.5371776181755	21.5538434128461
Female	Non-Hispanic White	146	12503900	2014000794001	W	N	87	20	'87'	F	NA	1	25	485	1050	1050	87	485	4.96130778216115	3.73646412748375	-0.0535471521051879	0.0434461562591452	39.762210462589	149.120385845967	1.78533968157749	2.09162879086304	0.157821865540358	0.307666006868119	0.381274496142522	0.487217226035086	2.41735065653169	4.85301106542175	1.78533968157867	0.22464249848523	9.0774265441745	4.85305641405894	1.14580084784605	4.85305641405894	0.219753140016823	21.2715099389099	33.3897042413614	47.0611414330332	226.004964178107	0.0849748884477098	21.0041145975072	60.7062772461625	19.0159712907572	25.6337438948959	10.0873907695168
Female	Non-Hispanic Black	130	11700501	2018HU1001379	B	N	36	16	'51112236'	MMMF	NA	1	17	486	436	436	36	486	5.10482540158719	4.43232241773985	0.06784235273557	0.0302004855178104	90.0319646880612	169.868717227084	3.57354655288474	5.24796905806452	0.305066227782621	0.904875334573854	0.9191164437022	1.18632296343187	5.58375521760929	9.71390607701076	3.57354655288434	0.587379522478282	23.5019854014522	3.57354655288434	2.54592759849827	9.71390658602827	0.406097444051283	24.1940091882651	79.0214790631091	111.352042824084	249.201280647356	0.171177795311372	41.4695760697443	147.260040903227	45.6995242765203	59.5964859896285	22.2633094357931
Male	Non-Hispanic Black	152	12600100	2017000255291	B	N	70	103	'5470'	FM	10	3	26	487	843	843	70	487	5.15526970806868	4.42676238815131	0.0811366171860468	0.0471942654829466	90.7309927872289	181.719442603907	3.37870078712689	4.72903040845096	0.198904470719022	0.863054961477962	1.11215798451829	0.918788529864058	3.60867019947296	9.18418293169814	3.37870078712689	0.435585170553664	29.9990682988502	3.37870078712689	2.18966188018461	9.18426095344714	0.384838642374587	25.853811125543	47.6399270200875	99.8652656331438	272.636381394571	0.506642529468392	40.3205680562099	175.081833064115	37.2775679745733	56.359560081898	23.0289189104316
Male	Non-Hispanic White	153	13200406	2018HU0541064	W	N	51	25	'4751'	FM	NA	3	32	488	613	613	51	488	5.1813234137361	4.5410181588568	-0.0443838612909677	0.0243292325209656	89.7146697059717	182.299811241655	3.36532583111451	4.48135319192445	0.189193885949542	0.849822783996669	1.30521287496016	1.1997096200033	2.82531776517412	9.13315150378771	3.36532583111451	0.507375544158362	29.8509483317859	3.36532583111451	2.00317454386377	9.14790405347594	0.570004799037379	25.6585389374498	45.135062673229	106.892649320382	273.289172801146	0.5091982217778	35.6195744186841	178.407388468309	39.3762535551397	65.6156693187852	22.9926778147903
Female	Non-Hispanic White	189	13902300	2017000893112	W	N	68	30	'6871'	FM	10	2	39	489	820	820	68	489	5.0723300664923	4.25128764721975	-0.302089597871032	-0.0045301212641959	51.8937339295729	158.824520043567	2.36535201714551	2.90999001515038	0.216405199597842	0.562630330899449	0.77232434855018	0.689768867399992	3.68572939945506	6.42938747510885	2.36525252096842	0.217019225708629	12.8679479755327	2.36525252096711	1.59401132290223	6.42942294746184	0.289123346789269	20.9400395812089	48.9688538687896	64.4681354937182	236.948180494749	0.113836147177019	28.1335105688517	91.7280055163143	25.8779240763231	37.8967985658491	14.0110570313444
Male	Mexican American	263	14805700	2017001199586	O	M	33	47	'05333308'	MFMM	30	3	48	490	405	405	33	490	5.14339799604822	4.44758590362232	-0.221181382764698	-0.0523705913674333	68.4706044369749	162.556787893387	2.53730166235827	3.71699992225059	0.137031696532387	0.785392005751752	0.913065618302677	0.80105385276681	4.84144850436761	6.89706537212407	2.53730166235827	0.302666665460129	23.1586334782589	2.53730166235827	1.35641242738765	6.89710100210741	0.349190054583053	25.9855986983177	28.7098937480605	72.8185582881064	250.77635962125	0.329692553447581	25.3127549295505	122.319699375997	25.4310388712865	40.2165334269104	15.9073818536788
Male	Other	79	11100101	2018HU1217109	O	N	73	33	'7374'	MF	NA	2	11	491	887	887	73	491	5.1151846718333	4.18254857396287	-0.0280980190849659	-0.0105563554446899	63.7169459631441	164.782812077277	2.46423901732651	3.13106369053222	0.144579113020366	0.829223473257573	0.882805453110038	0.662912405285085	3.41955845644569	6.6984527496154	2.46423901732651	0.297234387629375	21.8742906607219	2.46423901732651	1.54685828098081	6.69849614172895	0.294867219068584	24.8566419552398	29.8249966280106	77.574651975763	253.347541577403	0.331698307247942	24.7904547778493	114.664446961727	28.1715339622107	42.1626765973439	15.6077224224697
Male	Mexican American	247	14400101	2017001291427	W	M	59	93	'5958'	MF	10	3	44	492	711	711	59	492	5.14075366376371	4.41008960335258	-0.332102376041119	-0.0592944853635351	59.0265431898343	161.008825201797	2.27369425103271	3.36521303430032	0.116391136791365	0.661571855123655	0.598773047618318	0.665029235789295	2.66104756048047	6.13154988808548	2.27369425103271	0.302708429253739	20.3996895497672	3.15672585281334	1.33754243068569	6.18054175402048	0.320886002278666	24.9606335209856	28.4186302200014	65.5199054182787	248.983187653719	0.258207137777253	23.8481621105734	104.545337009191	21.8355893409665	34.9584318426588	14.1527910593015
Male	Other Hispanic	254	15151097	2015000593964	O	O	70	141	'70'	M	20	2	51	493	851	851	70	493	5.1259867086994	4.43365816000621	-0.0568337317088872	-0.0211439788345083	79.5849041332005	164.818147520908	3.00837781129571	4.10487601631024	0.158609316995156	0.49796512923963	0.497416802858075	0.67291767683126	5.17001040295902	8.16377555211537	3.00837781129571	0.326730858663871	26.3224629671934	3.00837781129571	1.71878526427589	8.17761873758439	0.487415556695793	25.4544246518436	36.7462010431228	100.448157788154	253.388285698672	0.371558879615487	31.3868212299383	141.789473688074	31.7142341104205	49.4148671224781	19.0571924084536
Male	Non-Hispanic Black	151	12200300	2017001116296	B	N	63	9	'6263'	FM	NA	1	22	494	765	765	63	494	5.16720320035606	4.48393633272303	-0.122967723307807	-0.110624867928551	78.3329717427363	157.052215432476	2.98504635186765	4.06818007835187	0.145411207319456	0.851223950538413	0.839043926723105	0.435049635713997	3.89838213643209	8.09708539734969	2.98504635186765	0.429442427619312	26.6527382820927	2.98504635186765	1.54684287914055	8.11419725537643	0.325294236622538	25.2417940993532	35.9636485264732	94.1099906606989	244.380085375221	0.377605600565736	28.4848048440943	148.215081103192	28.3711521711615	49.2951549994988	18.2371470579602
Male	Non-Hispanic White	69	10607308	2016000092507	W	N	63	13	'6344'	MF	15	2	06	495	760	760	63	495	5.18648619722784	4.5065204284801	0.108435033975645	-0.0112830973784538	100.983330882756	176.832525288802	3.51917514885645	4.65808476926166	0.182964588799652	1.2075651312106	1.22804809459643	1.09155957930449	7.70562455299437	9.55158971630581	3.51917514885645	0.474889376133076	31.3563275971678	3.51917514885645	2.55915298401181	9.56610985792668	0.621946700524931	27.6951704906107	42.5171390166637	117.898747340411	267.118749927724	0.513837307228357	38.1953506385966	183.093960374561	38.1430820629806	64.9689951394412	23.5009416634812
Male	Non-Hispanic Black	199	13600100	2014001279287	B	N	64	18	'6464'	MF	NA	1	36	496	779	779	64	496	5.16378515857056	4.47210924023123	0.0678186860399618	0.016404574415089	93.684047717493	177.716526481962	3.25129678938675	4.29926541058797	0.195268398344483	1.44226461941726	1.09053941961185	1.05358411973748	8.25675171010799	8.83773045179327	3.25129678938675	0.594515001418147	29.0437048678584	3.25129678938675	2.11753521424744	8.83794095462643	0.593812144845157	27.8143635558916	45.5786664671499	100.903825589568	268.119637816118	0.457250387592939	35.5947330466802	159.827929168145	35.1566576303182	57.928103936634	21.793412940077
Female	Non-Hispanic White	163	12401004	2017000872388	W	N	22	95	'225054'	FMF	NA	0	24	497	273	273	22	497	5.0974971941907	4.25633693111076	0.345150023416512	-0.0331330053891564	99.632354331593	158.279774021324	3.89670938728779	4.87774080110425	0.356509093505658	0.892461879437041	0.776661855004696	1.13132464367451	7.74775902070606	10.5923511194562	3.89670938728779	0.655679803941165	25.4742069494645	3.89670938728779	2.17048350987644	10.5923543182499	0.530782259150876	24.5683307194073	85.1119469173442	104.293725951837	236.338394310542	0.184886175319726	44.8455736664553	161.935083684729	46.8591291734567	59.0126975250652	23.0235509921603
Female	Non-Hispanic White	119	11703410	2018HU1227905	W	N	3	13	'053607030132'	FMMFFF	NA	2	17	498	41	41	3	498	4.5959027243326	2.75067677951462	0.114054782965681	-0.0390587916671666	17.5443430124957	95.2822874733384	1.05952295715722	1.45453223342486	0.0648225037098535	0.193404395901923	0.064587322330867	0.232196874061827	0.762953499177208	2.87261574251587	1.23493402374703	0.0519975717093749	2.38249730868487	2.87261574583897	0.452161488816866	2.87261574583897	0.101484662914332	16.601757082269	15.2502968747	20.5825921153467	161.519270916545	0.0330593060390812	9.03677464583611	27.0845224012171	8.0884768334685	10.4145351702527	4.26724333762629
Female	Non-Hispanic Black	203	13702600	2016000521910	B	N	9	34	'2211094240'	MFFMF	NA	1	37	499	110	110	9	499	4.92400191640483	3.60393445993738	0.186044391120998	-0.0103631260802571	44.2554643098547	136.133876874274	2.25587789372689	3.1308583718326	0.182719914734883	0.644871906637827	0.436552114106325	0.548777844555783	2.21451785643529	6.08142072714355	2.25410155230377	0.115591212440796	5.97154139845534	6.12728328912334	1.04259107930999	6.1272832891232	0.178827680809929	18.6333054495203	41.6164630061732	60.0515855026308	211.076495005942	0.0960915202347178	22.2819772762514	84.2751356439273	22.3334162574586	29.822227093975	11.894696376183
Female	Non-Hispanic Black	118	11701001	2016000375500	B	N	45	25	'21451249'	FFFM	NA	1	17	500	546	546	45	500	5.08762153934595	4.44415381203284	0.107570153267175	0.066782785428364	94.7956920103879	173.192609479166	3.852240835687	4.62112292216794	0.378847091655038	0.758515122797644	1.87693322522433	0.986031084525812	3.54045220652781	10.4714157048939	3.852240835687	0.656822784968875	25.5161290943686	3.852240835687	2.39880991253226	10.4714762624946	0.546908972430844	23.607934979611	77.6374509983396	109.755843974896	252.849576896442	0.213924962392342	47.58341357144	155.65036745939	49.0334031772692	56.5515735034411	24.3509366351663
Female	Non-Hispanic White	262	14804619	2015000238675	W	N	27	17	'0032050427'	FMFFF	60	2	48	501	332	332	27	501	5.09729094591339	4.30203296165391	0.0376555713528536	0.0970696330531277	76.6836511920372	180.25284847747	3.1893877425923	3.91397308376685	0.295094167644181	0.594416419958396	0.740774074662757	0.930465998132529	4.24141836495646	8.65449059304805	3.1893877425923	0.4056813605797	21.2876810430923	3.1893877425923	2.33396860208344	8.66965440873054	0.363508938064762	23.0433767798046	72.7528299389252	104.762878438325	260.541444583967	0.176539937055745	42.0134114831057	139.54001637454	40.9207874730076	50.9388644305926	20.7741922448349
Male	Mexican American	119	11703421	2018HU0452573	O	M	58	63	'58172357'	MFMF	NA	3	17	502	706	706	58	502	5.1400608051061	4.40715880680124	-0.0995750312547709	0.0105384733424856	74.2608411327486	172.534855762107	2.8071357133179	3.43829134142068	0.15910367425631	0.602017124328891	0.609392967775087	0.608837330184337	5.3451610376323	7.63058381633847	2.8071357133179	0.376391392481751	24.7113498767656	2.80713572365372	1.76844264270301	7.63058599953026	0.35450888122047	25.4543109834101	37.7830685337813	92.1366444042764	262.23484303895	0.363925887110923	28.2869461601169	143.027919673348	26.4428063992792	47.9552912114303	18.4032198292738
Male	Other	276	15159304	2016001458661	P	N	10	79	'17421046'	MFMM	10	2	51	503	131	131	10	503	4.97565324213061	3.69902496839935	-0.0447725638954893	-0.000771835481705322	38.6386242534564	144.731659917801	2.03119027094864	2.76190757375505	0.094645699026611	0.729781243198969	0.350764602756187	0.677762033836263	1.82386231586793	5.46164639784654	2.03119027119428	0.109370921679456	6.45774694941856	3.5939234334336	1.07894770142202	5.52134760355945	0.19467416027789	18.0226512464773	22.9220760366192	59.1283939188503	229.855774744987	0.254347622004232	18.2788233842962	82.4511740910248	18.742943990419	32.2694990021531	11.6720203345845
Male	Non-Hispanic White	192	13905501	2018HU0922120	W	N	11	49	'11434515'	MFMF	NA	3	39	504	134	134	11	504	5.00193655521892	3.75353363616586	-0.0919071448887505	0.0256355053802018	38.9246019377436	152.562151005433	1.83987185913288	2.53615515085341	0.0931666059614517	0.560452091900153	0.47782113910557	0.486830657607802	3.092269925998	4.82983528723587	1.83987185913288	0.083770595777223	6.50716526726784	5.00128807161718	1.13189426306667	5.00129024137406	0.237080499751347	20.1561475486237	21.5413166959464	56.686509088397	239.121080441224	0.197475949444595	17.7746319610524	79.5201228918629	17.7054757421313	28.7905778416271	10.9988036707314
Male	Other Hispanic	119	11801002	2016001331558	O	O	6	57	'03062625'	FMMF	30	3	18	505	78	78	6	505	4.77748039938709	3.1990182139089	-0.11397736430774	-0.0502894836290427	21.8683601376194	112.97775215657	1.19253172873508	1.91688696171711	0.048025049768054	0.270610486116029	0.149224994637303	0.342525925190807	0.6500153612817	3.22083370136791	1.18495780781953	0.0452574426364766	3.24583918951914	3.22083370390696	0.564636959609107	3.22083370390696	0.192494328148223	17.4560857776018	10.9121822419582	27.2807932917544	190.887486344156	0.110731219783863	8.72285525160329	43.3994491050623	9.70000741490351	15.0969873328168	5.65446197699694
Female	Non-Hispanic White	58	10603711	2017001362265	W	N	35	12	'07093435'	MMMF	NA	1	06	506	427	427	35	506	5.10705351039541	4.28384265145859	-0.0324227391227746	0.0665672473325472	70.2050265914973	176.5529369961	2.96512489295771	3.90921469581088	0.284306473605038	0.753521017524949	0.744001656210874	0.858276425016526	3.58681909022586	8.06001229556221	2.96512489295771	0.280257722258525	19.6036823125673	2.96512489295771	1.81456505667342	8.06004511563851	0.605991576583371	22.6769205770174	62.2914016951062	92.9491512432998	256.5201140542	0.145701719272185	36.7000318171401	131.196194756793	38.3283935505153	47.2313167054573	19.0153543931615
Female	Non-Hispanic Black	40	10603705	2018HU0718414	B	N	4	35	'0423'	FF	NA	2	06	507	56	56	4	507	4.69009638171493	2.9503691377637	0.286363880824472	-0.00946267602566704	25.4504396676049	107.838388723403	1.42396770048166	1.98141519289191	0.0968684650836852	0.131205107684495	0.197052232650515	0.279517452927151	1.15844969213919	3.86998349423952	1.43467519145962	0.0870205780170944	3.24693897758193	3.87001364576446	0.526284280224318	3.87001364576446	0.150348313628225	16.8762845646264	20.5062007243349	28.0466142562594	177.23327272494	0.0518746830056742	12.5149381727717	44.6430904831438	13.1745248550273	16.411085442562	6.30816842414971
Male	Non-Hispanic White	187	13602100	2017000715329	W	N	69	16	'69356424'	MMFF	NA	1	36	508	837	837	69	508	5.16718228036699	4.47791671875713	-0.244037699959365	0.000803365264405105	68.9843052650669	175.56083932125	2.60589150676035	3.50233404669368	0.144182813343088	0.738459856674543	1.05295558194487	0.831166656318289	4.55195373164659	7.08354700314982	2.60589150676035	0.441667451378202	22.814691271461	2.60589150676035	1.39451957215228	7.08354752976228	0.472729809570807	25.472439503373	36.8961731166242	82.5091487140408	265.676718361395	0.347958054925939	27.4693939636004	136.528874659095	29.1074183328611	43.859796859757	17.308117598048
Male	Other Hispanic	156	13200401	2017000218718	W	O	32	31	'00323004'	FMFF	45	2	32	509	384	384	32	509	5.15355238456353	4.46833020515167	0.00664182455922709	-0.0142645731016784	87.792144803742	170.594229792154	3.1197208992555	4.38053929847984	0.16140746743846	1.18097075005558	1.03561479623194	0.655103053136611	7.33330280220369	8.47986929328312	3.1197208992555	0.408951539560929	28.1403413486584	3.1197208992555	1.82637148399828	8.48028062855013	0.357820265192195	27.1410253156598	40.2222071980979	98.4046228084072	260.019557546293	0.419718221385134	29.1193004073649	147.163452643806	36.0542173305501	54.7681333897699	20.2797111973085
Male	Non-Hispanic Black	46	10600300	2015000766054	B	N	42	51	'4215401203'	MMFMF	NA	0	06	510	513	513	42	510	5.17005971114428	4.49395879334277	0.145256199194878	0.0272149235048848	103.463096393312	180.778881387241	3.56977747237467	5.29386371565662	0.20706357496121	1.13262734238939	1.69912864214026	1.41441400802207	7.858893573135	9.70261832623703	3.56977747237467	0.235687115855489	32.1135967871025	3.56977747237467	2.16899602207158	9.70365995892995	0.294446593144342	27.9830660857655	44.313104097115	106.206212258496	271.577341689735	0.475884333604	38.8324986393907	192.24145459502	38.643130689041	59.7365387493749	24.2367669092854
Male	Non-Hispanic White	38	10603767	2015000568465	W	N	89	12	'89'	M	40	2	06	511	1074	1074	89	511	5.01303237551005	3.89890993513039	-0.114378172954073	0.0285712995048289	44.0150562187864	154.717933466707	1.78091521801694	2.44358030070819	0.0915441940783265	0.364049935011359	0.50466720928674	0.370685035440958	2.7222112073894	4.83380771295771	1.78090317031026	0.224195085001524	15.4975133715532	1.78090317033902	1.08641838474514	4.84099663997723	0.227594158783002	23.7150191522362	23.0913585206045	52.4415529784739	241.650809261136	0.202766900198079	17.8537089725668	83.3993068888414	16.4521876881202	27.4577630372496	10.7589173080299
Male	Non-Hispanic White	115	11703009	2018HU0131123	W	N	51	25	'5251'	FM	NA	2	17	512	612	612	51	512	5.18239642316088	4.5454307071794	-0.30050916005491	-0.027779487769718	69.7502878185988	173.229435981415	2.55869707125974	3.51542721733227	0.139759515983569	0.791396559290329	0.648464712253859	0.836053125284557	5.79006920537172	6.95470901035058	2.55869707125974	0.411707704465744	22.8803376773624	2.55869707125974	1.72260026083189	6.95525975257563	0.481631505891621	26.2600803753053	33.941962605258	85.2218137673939	263.026211961779	0.324518833102322	27.3629257535908	144.290182919002	29.0306745262638	48.044024962586	16.8251099552787
Female	Non-Hispanic White	59	10604701	2017000943712	W	N	74	26	'7478073534'	FMMMF	NA	1	06	513	899	899	74	513	5.08044188542877	4.31301986442822	-0.0756141001813411	-0.0373390816784215	69.2280248656028	154.950049509104	3.14891102966902	3.48492443888504	0.278854488892273	1.01615801736983	0.746475959826171	1.02140324945521	3.26846801328269	8.54683208007846	3.14891102973634	0.257440206140163	16.678601811181	3.14891102966902	2.09895741047642	8.55962763124869	0.428971560133049	20.9847509864003	60.7572354067551	84.9052044762241	232.599621637768	0.133798177223901	38.9779163722767	137.862166004959	39.6362565644642	44.5331571304218	18.3108878518002
Male	Non-Hispanic Black	55	10600109	2016000454472	B	N	28	62	'615928'	FMM	NA	0	06	514	345	345	28	514	5.16469422932635	4.43715944686328	0.303637125837588	0.0047844181529624	114.525393156761	175.823147743532	3.78842625341352	5.86549475191939	0.211960876721267	1.40512178570194	1.25109641093277	1.0723736972868	9.99280415582602	10.2977066740985	3.78842625341352	0.664519605471586	34.5538374107881	3.78842625341352	2.69238970561337	10.2980100992189	0.674435682002267	29.2303345758861	51.7350724727773	124.088638138987	265.974376855645	0.486381622895844	41.0625235587327	190.003301617629	37.9401252425748	68.3634926668172	25.1906078003807
Female	Non-Hispanic White	55	10602300	2018HU0288125	W	N	48	43	'484820'	FMF	15	0	06	515	587	587	48	515	5.10135598175484	4.311006048474	0.0630983761319911	0.0114273311793244	79.3687270347179	166.132109621143	3.20246509366946	4.04033863847596	0.285829283278577	0.778885495322463	0.983419055909289	1.00756522873398	6.47022554624466	8.7052004414648	3.20246509366946	0.576130010526986	20.8463424431999	3.20246509366946	1.71777715816684	8.70520266937064	0.495698530035761	23.7836353288008	70.3271119153191	88.5063063060796	245.078604873534	0.168128111284475	39.1497929139971	137.097045322308	37.5668588383436	51.2014795484625	19.6213919328176
Female	Mexican American	202	13401600	2014001057435	O	M	28	34	'283601'	FMF	NA	1	34	516	347	347	28	516	5.06865333909426	4.30630246556616	0.348625985603283	-0.0138348342837374	105.101699826161	156.776073658677	4.11580293083003	5.76690326911387	0.381898425707543	1.09299429726466	0.843597648240714	1.09437042553206	5.8302932860026	11.1873468388711	4.1158029308349	0.368680837951432	27.4632884074886	4.11580293083003	2.42119515150817	11.1879123163937	0.668846642314374	24.5361351338961	84.0091646447122	110.130485844412	234.65242792981	0.198369968992671	46.0190506080936	165.98534728296	44.567747128362	59.305078559591	24.1445787649973
Female	Non-Hispanic White	192	14201803	2016001486990	W	N	70	26	'25135170'	FMMF	NA	2	42	517	847	847	70	517	5.08389749478332	4.3409072273262	-0.151742004186895	-0.0230847495369241	65.9676996599083	157.718649329078	2.84143008200568	3.28976142418179	0.257181518225567	0.717047286328932	1.18273405235898	0.929567161991906	5.75050937772136	7.72190510843498	2.84143006492352	0.360680335716091	15.5872441816465	2.84143006493471	1.91831644535129	7.7238077113059	0.353422338864667	22.2163727956063	57.3522992942147	76.6607994892865	235.709725087966	0.139115422150275	34.27778022964	106.7629650536	32.081408130033	45.9784361550826	16.7438174864951
Female	Non-Hispanic White	45	10800600	2016000891324	W	N	49	25	'182149'	FMF	15	2	08	518	595	595	49	518	5.09936027831727	4.32534080750515	0.0972184176100931	0.00670241042742311	83.3092198162019	165.019341582817	3.48072416851704	4.07649532905961	0.336655752466108	0.748051615996193	0.748173863688471	0.869945931477851	3.97032828306959	9.44635761767678	3.48072416851719	0.425561290107753	22.9326396898637	3.48072416851704	2.27351276688202	9.46158925715808	0.468120245583452	22.9344503565463	66.8297417659019	103.957353493592	243.846402021779	0.17025765911974	42.5709145897922	143.14916624128	44.5303755678019	59.4467279987129	21.2190516230782
Male	Non-Hispanic White	151	12201501	2016001485376	W	N	58	17	'6058'	FM	NA	0	22	519	696	696	58	519	5.17462793770088	4.488630052511	-0.0145131325267167	0.0198534833357679	87.7171049750159	180.274631920978	3.21652129758566	4.28937463355978	0.181766274777741	1.09550358609719	0.875440280492744	1.04155958405597	5.07373478531394	8.65512247655387	3.21652129758566	0.318807312796792	28.9360808205353	3.21652129758566	2.04065645982679	8.74341139407649	0.338797169795971	26.2707987479694	40.9455817820808	100.388919142415	271.009007056854	0.427475592297664	34.9351161301729	162.215389773167	35.4079455164967	53.888785311961	21.7926560758978
Female	Mexican American	191	13704000	2018HU0196746	W	M	40	48	'200040'	MMF	NA	3	37	520	484	484	40	520	5.06134191042293	4.26542373217206	0.380525371820344	0.0254715307276682	104.162179626233	161.873220792571	4.08911329699836	5.52839436298366	0.398383952930485	0.898619996307328	0.71235117393876	1.30671408198538	6.04978853370545	11.1153568235804	4.08911329699836	0.292024250525764	27.2258520298298	4.08911329699836	2.48332934214897	11.1153623559391	0.660794707928016	24.4730480817672	82.9998452633037	119.406387047013	240.351297203373	0.189021218931684	49.6565297913233	169.517502861349	52.7787942324884	66.3796001266715	24.570592133628
Male	Mexican American	274	14802318	2015001137166	O	M	0	29	'06440024'	MFMF	15	2	48	521	0	0	0	521	4.01671119050345	1.78145514994054	-0.0848264502357894	0.0227564238504253	5.45552414386915	56.7960973280808	0.959453530023624	0.144008948630539	0.008578595688616	0.0454414534000373	0.0165001905852259	0.0441471469145836	0.101931603168067	0.959453530023624	0.954901124450901	0.00479990562854082	0.115682407433308	0.959453530023624	0.0789475536702694	0.959453530023624	0.0122679217120359	15.4563526850893	1.99932280302943	4.60319812912763	113.965036238181	0.0183970123590999	1.56456811237543	7.55226057069608	1.64994130382799	2.57122671586399	1.00563667804066
Male	Non-Hispanic White	189	13905100	2017000404550	W	N	58	102	'4558'	FM	20	2	39	522	700	700	58	522	5.17326088837625	4.4931562116022	-0.157771707681103	-0.031671602390895	76.354311778527	170.987300213156	2.84762776879112	4.0147070379799	0.154081053986865	1.08867557141952	0.998211866442386	1.03771980501051	3.73325929734208	7.70004182167694	2.84762776879112	0.51601838019862	25.2274495620585	2.84762776879112	2.15306321854073	7.74065481812026	0.380771321675221	25.8133049604798	40.0767872921418	81.7752083190082	260.468766416278	0.397469853962023	29.5214126441439	146.247070467971	31.2245114855164	48.2654071896349	18.5429523037441
Female	Other	241	14202802	2017000608305	N	N	28	11	'28'	F	NA	0	42	523	346	346	28	523	5.06956041078471	4.08780840076783	-0.16231910514773	0.00708192625686674	50.6778684524982	160.235136098227	2.08482894889587	2.40443222931172	0.192608366503676	0.634619579192301	0.266720895947872	0.534320051567653	3.06053130197235	5.66114686424969	2.08482894889588	0.318149909371177	13.6812134730891	5.66715264722897	1.1193217138314	5.66715264722902	0.250241627064665	23.3079263070178	41.2304492928278	60.7295773445048	238.524794093133	0.0957912288670791	25.7105181759857	89.2370148647937	24.6157264085188	31.7727133036139	12.4320848938698
Female	Other	265	14802313	2016001464425	A	N	79	25	'79'	F	NA	0	48	524	956	956	79	524	5.07325153748475	4.13020205876341	-0.0757606545617622	-0.0217042950040258	57.65294930454	156.264055923467	2.67738495971167	3.23376877543414	0.259211983864092	0.694743891655584	0.512505566180514	0.638347433435724	3.43381783784089	7.2778868671287	2.6773849597132	0.26646066858589	14.0489356256361	2.67738495971928	1.62595773719741	7.27788688370753	0.419006645520888	20.5333058831961	50.5355859033582	75.9504833128303	234.077426350056	0.123630898602689	31.0881151804244	107.185827829497	32.4206897577149	43.6515449630769	15.6678845179414
Female	Non-Hispanic White	238	14203004	2016000965945	W	N	46	104	'03500746'	MMMF	15	2	42	525	553	553	46	525	5.09930222568128	4.31477274352138	0.26515561908392	-0.004350153889081	97.5074087801192	163.196022744054	3.89110129649995	5.1822248780488	0.376641719666257	0.834115178033999	1.01107006252195	1.02119126382289	6.06311947253556	10.577109310914	3.89110129649995	0.491971628336009	25.9950749587516	3.89110129649995	1.45217390208361	10.5771099469692	0.528874650469918	24.0590774565101	82.4182025777118	116.860744536872	241.822881714466	0.188549755319831	47.6305129216167	161.889014667694	50.0322738188784	66.131740158446	23.5239332140628
Female	Mexican American	202	13401600	2018HU0536332	W	M	50	54	'15165048'	MMFM	15	2	34	526	606	606	50	526	5.05306220801609	4.33550199347824	-0.114268412794355	-0.033841484452141	68.1174608667895	151.293358494819	3.06312207753758	3.7530109162895	0.257443184384282	0.896109547650036	0.441855177763785	0.75504244509838	3.05094201709831	8.32642556509119	3.06312207753758	0.344940674213591	17.6599251383542	3.06312207753758	1.82129019209115	8.32642908171859	0.424909999283519	21.2379190716253	62.6169042498277	81.8112853860759	228.470489518576	0.1454620081672	33.328756003635	124.367943720558	35.3912663862002	44.0570635410583	17.4958250127542
Male	Non-Hispanic White	80	11207301	2015000183765	W	N	31	33	'3531'	FM	9	2	12	527	378	378	31	527	5.17788473569848	4.44133530257236	0.243416398825162	-0.00541535057106516	108.283382357442	176.349775761481	3.73526714000382	5.21301137855152	0.233086421277359	1.24378738743265	1.35410886676137	1.4136841547367	6.66030718197535	10.1399223910206	3.73526714000382	0.41077118189272	34.5021341520508	3.73526714000382	2.60639773059252	10.1535087844842	0.401628250024461	27.9894613420692	45.4445660850233	116.950409879609	266.571641139741	0.490801140580752	37.4075354703503	198.831251456837	40.5803056825915	68.0603830349633	24.8929072901541
Male	Non-Hispanic White	155	12602500	2015001505554	W	N	2	19	'30020333'	FMFM	NA	0	26	528	25	25	2	528	4.48724716050542	2.58211745896725	-0.277766218901303	-0.0189067701451959	10.0176770762823	87.2118651907966	1.50387752657331	0.755246734412059	0.0188884612994504	0.0829070992993585	0.0572954007970646	0.129002130509192	0.254436038790473	1.51063202961148	0.574241341310314	0.0112911989425816	1.54029115390747	1.51063202961212	0.219682945541782	1.51063202961212	0.0769659232117242	18.0261433797487	4.5033171662221	10.5121029722649	157.204307920213	0.0440660036623555	3.41475096345809	17.0103790807006	3.41118433319111	5.34438406853561	2.18408058585948
Male	Other	225	14800600	2017000533666	A	N	49	10	'49312653'	MMMF	30	5	48	529	599	599	49	529	5.14925272169511	4.40271562628091	0.0208866767122066	0.0280285760347732	83.3961631568702	177.200400394289	2.9510043154479	3.96199065009922	0.168341053726375	0.623305969172077	1.08870599513879	0.727124493936523	7.75842120215646	8.01344193754989	2.9510043154479	0.418513144120895	26.9799785151766	2.9510043154479	1.78235046458805	8.0216614063858	0.481496506744966	27.2602647242189	39.7827571835849	95.2846642658732	267.535418778445	0.382335880684716	32.2406703047422	156.008445731831	30.8251079778265	51.1672523246494	19.7374543837588
Female	Other Hispanic	199	13500802	2016001187186	W	O	71	40	'7174'	FM	25	1	35	530	857	857	71	530	5.03414719344601	4.24688425738271	0.154677048036582	0.107889196531639	81.5781376746648	171.063766410611	3.64294986580209	4.51613342984035	0.360217480190761	1.16101879705091	1.05309871914392	1.02383753873055	2.22463345576281	9.90256068065611	3.64294986413589	0.353161994550506	19.6753820682057	3.64294986198067	2.34037636970606	9.90256440979413	0.525655204153292	21.3934286129073	79.9740257119628	103.292031283191	250.515001031428	0.186906933819126	46.3857225489481	168.077647763532	46.0989117078344	62.0247547504853	22.8153397107882
Male	Mexican American	228	14701602	2016000539469	W	M	9	9	'38330905'	MFMM	25	3	47	531	117	117	9	531	4.92418697267283	3.58983668928252	0.0484526938891558	-0.0435061934384169	38.0267318890651	131.720305818136	1.94237949130483	2.58489686602102	0.082639532294672	0.632439427242037	0.345649957561032	0.431578079052894	1.62438089373621	5.25024809072699	1.93145898122314	0.126222134909504	5.72424119093337	5.25024985107286	1.22677139880346	5.25024985107286	0.239854333302878	18.688086494896	22.341452648195	47.7221749193619	214.176742855673	0.219461997249374	17.0568579824565	78.2046451878553	15.7007087437369	25.7130100627339	10.3418398389427
Female	Non-Hispanic White	104	11209506	2016000940877	W	N	66	21	'6666'	MF	NA	1	12	532	799	799	66	532	5.08933821605733	4.31833997638541	0.253950628226945	-0.00107096685408588	96.7655076266547	162.108724531605	4.07525943350831	5.15564694417335	0.374398170161876	1.07741727918468	1.1558101871535	1.19602830665764	5.02654775085143	11.0776954926216	4.07525943350833	0.350025961706015	22.1882705729009	4.07525943350831	2.77547105851013	11.0777036629521	0.475260759442102	22.7446251473004	86.6382083646899	117.51439989718	240.613508617799	0.199052566287527	47.7707300329379	165.996239408245	53.7608205344184	62.5595771958764	24.5140617706054
Female	Mexican American	176	12600700	2016000114256	W	M	54	11	'5457'	FM	30	3	26	533	657	657	54	533	5.06100565439681	4.32431945314405	0.0964834947672887	0.0623151686717152	83.1630341414244	167.891984474924	3.59243210022693	4.31004453081856	0.365891892811875	0.852885605649419	1.05044838138437	1.03076471330145	4.509425200542	9.75615735258189	3.5924321002526	0.380001435679807	20.2390453990183	3.59243210022693	2.0281386754918	9.76524289801966	0.463654645301637	22.1495075818332	66.1538686728778	100.628009404452	247.023167532377	0.179019965248177	41.153455317242	144.273397930876	44.0130232880481	58.4348067903559	22.1853489135762
Male	Non-Hispanic Black	47	10606509	2018HU0618444	B	N	38	17	'0936631310381012639407'	FFMFMMMFFFF	45	0	06	534	462	462	38	534	5.17840767443311	4.56871206918424	0.0827584788739306	-0.0339058379991888	104.738895963142	171.486035294072	3.61082852908228	5.26773425562534	0.210152800082219	1.49314419822645	1.42412362809088	1.13952971994916	7.68083618163222	9.81522330654211	3.61082852908228	0.249747586165854	32.9317692947367	3.61082852908228	2.10364812369176	9.81524952228151	0.389296128318524	28.0068872336515	47.3231956418994	114.052550227746	261.038359619988	0.43820866789259	38.6142131917306	186.771718851246	41.8057784044462	62.3212070854131	23.5641189025173
Male	Other	264	15541005	2015000170377	O	N	17	67	'171148134039'	MFFFFF	45	2	55	535	209	209	17	535	5.17096870784778	4.38421435639629	-0.283400603046929	-0.0585597540409965	60.3894096924195	166.069928189376	2.38478861420163	3.64707149467353	0.13533604814843	0.369692362742069	0.489125177290744	0.58828358970789	2.04477667991888	4.99148306499103	2.38478861420163	0.250493673410913	20.1981330555652	5.60609696947615	1.24971384012231	6.48252755470032	0.413559436237271	24.322751598464	28.341311914215	74.6486814792094	254.830267598761	0.317757555623423	25.450514011486	116.843534858848	23.4169327585937	39.9850612706209	15.192908018087
Male	Non-Hispanic White	81	11500302	2016001234521	W	N	59	32	'5959'	MF	10	4	15	536	718	718	59	536	5.18351527539161	4.55796871346113	-0.110613225749765	-0.04059662680419	85.400801646461	171.214755487259	3.13154329384309	4.55737338392182	0.16829821441433	1.03742030530339	0.989877556051674	0.919963478124109	5.05230261143855	8.51241622863654	3.13154329384309	0.42408387954457	27.6549009299644	3.13154329384309	1.98373906645766	8.51241723068638	0.492329125359586	26.2711547096816	39.9494009962654	96.7388335704843	260.728588996975	0.400793172417708	31.1757381126292	168.724998758251	32.3290159361189	50.8822821828313	20.4120716096662
Male	Non-Hispanic White	196	13602901	2014000310238	W	N	8	18	'3504171108'	FFFFM	5	1	36	537	104	104	8	537	4.89092732769193	3.42913892806844	0.297532694639222	-0.0122106262540114	41.5406149735	131.461850786112	2.22786727050919	3.17640312954073	0.101482210091369	0.418522811051682	0.459921649780886	0.585859805341409	2.34799264388412	6.02012908466825	2.22786729497577	0.189431901851722	6.37253401230196	3.14396509938362	1.34501668512021	6.05597111764379	0.290075090544519	17.6459110569138	24.4253010430904	57.4755977296446	213.861480273894	0.239488070355634	19.6171208800355	88.045515227775	17.7931907145094	30.7011331264314	11.9113748081214
Female	Non-Hispanic White	228	14801000	2014000001868	W	N	14	22	'676014366103693908'	FFFMMMMFF	25	4	48	538	173	173	14	538	5.08782117000295	4.07768429380356	-0.144039108848497	-0.0863479911660862	51.092881639639	148.631959354058	2.21131903094395	3.10355570851012	0.183977004887978	0.317275012734083	0.444380858503778	0.660605251254633	2.43251462622442	6.0053805602677	2.21131903094442	0.185537682957255	12.3125998903177	6.0109527988939	1.12891583733012	6.0109883387398	0.352055884712143	22.1051607318662	39.7260498654328	62.5951772423249	225.449546815799	0.102088361941784	25.8894850722472	82.4572876269338	24.7193856159301	31.4423592263783	12.4635218347866
Male	Non-Hispanic White	120	12000802	2018HU1342951	W	N	4	18	'043531'	MFM	NA	2	20	539	58	58	4	539	4.69100953357279	2.94019814627152	-0.0723741586288287	0.0319567070479409	17.5986815559209	112.501464644363	1.61181298111435	1.38761019202795	0.0368469329450804	0.256882390390586	0.122085236557082	0.317966963897751	0.526688854623076	2.69942423291788	0.993151251572457	0.0396645129306642	2.73348300424468	2.69943519669359	0.512984621376243	2.69943519669359	0.139806741306334	17.7215501734925	9.23605697614227	24.4253882918313	190.283615320765	0.086882306386191	7.33997522577857	36.7525464920112	7.68079959806268	11.6890995062901	4.72410810363032
Female	Non-Hispanic White	84	11302003	2015001262679	W	N	61	38	'2161600128'	FFMMF	NA	2	13	540	740	740	61	540	5.10092442111629	4.36653232883306	0.213723662960487	-0.0284643345629864	97.5393602871428	159.566392024418	4.06664464748537	4.78675608779491	0.391377198529806	0.918914775528135	1.2437266412182	1.41034977583835	5.73088204558377	11.0542842549761	4.06664464753049	0.514746483233172	22.4555434414521	4.06664464748537	2.54528925405643	11.0542862480592	0.523703371635849	22.9852184644303	88.1976860518031	119.127112924227	237.777788439966	0.188472483591225	48.8071146101106	180.852818186207	50.2526322969772	58.559297801534	24.1739442662574
Female	Non-Hispanic White	46	10601901	2014000009489	W	N	3	23	'24032602'	FFMF	NA	1	06	541	46	46	3	541	4.62096158050932	2.80029339411678	-0.149889773571269	0.07058216285291	14.1597526592442	109.021350954349	0.999039806155807	1.12935432536857	0.0598254461160758	0.164470810940353	0.0840090247312205	0.202167504696476	0.485507110758917	2.36305370596626	0.911682129343358	0.0394696784185877	1.97396065227415	2.36305370598742	0.345267050367015	2.36305370598742	0.0972990090788806	16.2883299061604	14.5887251703737	20.434348297648	178.689438420523	0.0318108734498418	7.4706145136897	26.3504828556856	7.82517154102657	10.8602127785702	3.88345254766864
Male	Non-Hispanic White	187	13600100	2017001191889	W	N	85	11	'82598554'	FMMF	NA	3	36	542	1030	1030	85	542	5.06319256164615	4.08296490067201	0.0140072717979143	-0.0369383993722869	60.1578639264762	152.361222033186	2.43179107846005	3.01992765688451	0.120757448894749	0.584869153495887	0.559120311514562	0.64037466656011	2.59136280094928	6.60259768272318	2.43179089198023	0.233008880415843	20.8298533849056	2.53472332413993	1.33129870111854	6.6102929922817	0.328610818034456	23.7380908140046	28.8762202262158	67.3343135852381	238.884844257599	0.285439791946276	24.913953014202	113.18136174749	24.267296269502	37.7434826641909	14.5229497124436
Female	Other	55	10600106	2017001252771	A	N	64	28	'6479'	FM	NA	1	06	543	779	779	64	543	5.05411558094925	4.18992824339969	-0.0470634460383499	-0.019240619975658	62.9829967660346	153.680375365901	2.6041598544446	3.33587307089499	0.234190608016091	0.789613641219504	0.77084326430546	0.887742262154448	3.36503001586294	7.07840772472404	2.60409294802176	0.465840393790467	14.3752182870553	7.07861997895747	1.65695696112782	7.07865854006561	0.345018114591529	23.1861554194164	45.8436626525085	73.9097213554812	231.168696376494	0.126946640218661	27.4872459989952	121.69709016931	30.9485940557097	37.8507948578179	15.0496193005945
Male	Non-Hispanic White	116	11703524	2016000530425	W	N	27	17	'2727'	FM	10	3	17	544	334	334	27	544	5.18666360206991	4.43986043161418	-0.105391787942664	-0.0153855900066981	76.2844139127091	176.139802491844	2.79206707214493	3.83938621366794	0.155566384985765	0.893641371208326	1.16057015076487	0.765108743069374	4.80162654310579	7.57393058104839	2.79206707214493	0.414561195041032	25.6030351209336	2.79206707214493	1.97326363930122	7.58962518604902	0.335244085387205	26.3218414678361	35.5875918770112	96.5439053209479	266.33355781815	0.375924908481016	28.6574399671974	139.823568338239	28.4278551003544	49.1190343805094	18.5905289247816
Male	Other	117	12001000	2015000025082	A	N	53	23	'5352'	MF	NA	6	20	545	636	636	53	545	5.14232000535547	4.35728450195784	0.213182609903216	0.0260382170040437	96.5892172059233	175.626261390963	3.40789419512794	4.94066016593848	0.190111128271423	0.982082879172989	1.3487529746483	0.897574589492005	6.37993742896027	9.24409413961395	3.40789419512794	0.536047075342359	30.5696082760057	3.40789419512794	2.70630317010717	9.26361686392049	0.428057600421628	27.3427863881488	44.4002633124555	117.96598729455	265.750967456567	0.40886660862892	38.6905997204727	163.309206709476	36.773022735708	61.1115923244254	22.6412794836217
Female	Non-Hispanic White	263	14935003	2014000868524	W	N	12	70	'46141219161702181154'	FMFFFMMMFM	45	2	49	546	155	155	12	546	5.06564561708054	3.98138845891091	-0.136363261691953	-0.0208318206345555	46.7598625545637	155.215394849239	2.20693274536942	2.98894389692099	0.215828202650409	0.546547293205539	0.302071231099232	0.529599465383555	2.13116278790375	5.69309782737768	2.20693274536942	0.220424724987537	9.09154367017082	5.99906517833528	1.37391395936229	5.99906517730448	0.19759492723797	20.1877152363022	45.0789906561038	59.4445789159003	232.898295422753	0.099977341123563	26.7073235912624	83.3219218079405	28.9085132380146	34.6070340630207	12.8497718627299
Female	Non-Hispanic White	156	12902800	2015000943405	W	N	10	13	'10373812'	FFMF	NA	2	29	547	127	127	10	547	4.97641944670799	3.69341642960556	-0.106435717366064	0.0456832381933027	36.1248398151292	151.730009007322	1.79619513616902	2.62405485088387	0.161066974416654	0.452998401201443	0.308781423641546	0.51728538875317	2.18931647989901	4.87902324791051	1.79619515318484	0.138132790160395	5.31587495665692	4.88256459901476	1.0745118638932	4.88256459901117	0.260377518592694	19.111868185121	34.6298523031702	48.3498537234265	228.964855943588	0.0781150316139723	21.3099253515548	68.2607728607361	20.1563741177582	25.6550205968087	10.2816390149878
Female	Non-Hispanic White	39	10800804	2016000219010	W	N	76	20	'76'	F	15	1	08	548	921	921	76	548	5.07181608843739	4.28510403567192	-0.108049157285836	-0.0113554451590078	65.1736260320556	157.663126057758	3.04550135349282	3.4864036671339	0.264261636269011	0.872939378977382	1.01121788502149	0.850034463788639	1.93707336770467	8.27852640750926	3.04550045945246	0.260145307838695	16.2314998215806	3.05803714934352	1.82900089452314	8.2785285573678	0.350598745618201	20.3999724842414	55.2546164140153	94.7140559207819	235.647487912453	0.148072595691761	36.3191451108895	119.740622660259	39.6735215925532	45.6265461267113	17.9416133173873
Male	Mexican American	184	13601802	2017000881072	W	M	1	33	'0135'	MF	12	1	36	549	17	17	1	549	4.39933615368832	2.41510124386904	0.033649850411809	0.0142653471717045	11.5738830005208	82.5662912395964	1.90680784689188	0.765017057022951	0.0213538353748141	0.141578815904068	0.046086856246989	0.135123556270006	0.312978866191231	1.90680840037002	1.09982060883387	0.0159647156656846	0.681504041270704	1.90680840037002	0.302631502537092	1.90680840037002	0.0430066559024843	16.499337761949	5.11918082205638	12.0775014454943	150.881101078266	0.05358586214144	4.36961151643675	20.3370135177045	4.2085839887503	6.94712132157191	2.64598530569042
Female	Mexican American	260	15110701	2016000870924	W	M	49	49	'524922'	MFF	NA	4	51	550	594	594	49	550	5.0501000722023	4.28279454921207	-0.00294468330344422	-0.0068196234709323	72.2295950686224	154.97757805279	3.04510725351005	4.05425823138621	0.26869055173282	0.538601424796564	0.8007112369147	0.963378022635472	4.25889527320618	8.27251046432909	3.04510725351005	0.187748671547561	19.9998095671039	3.04510831116621	1.78289829546149	8.27745970060846	0.306700955710402	22.7198853949609	63.1993701685491	84.4885718369878	232.630613818853	0.135397067362394	38.7089888012368	122.924170914808	35.9561239069081	46.568685610256	17.7096292382071
Male	Non-Hispanic White	262	14804609	2017000554132	W	N	37	26	'3505370103'	FFMFM	60	3	48	551	455	455	37	551	5.18540829473203	4.52146861241116	-0.0140352068804799	-0.00108294792212439	90.6887582874787	178.453015272593	3.2123225763254	4.52240515098397	0.193984668417577	0.991498835230722	0.664973022468777	0.934721605339459	5.93802724545107	8.62710982351211	3.2123225763254	0.411134421010479	30.3210581306436	3.2123225763254	2.18585128421517	8.73199808637401	0.624593062238308	27.2315228725312	44.7954897552528	112.078633608053	268.952558348006	0.408554202570797	32.9580954651032	166.952534856486	32.6123488638663	54.1442531405907	21.5990593785443
Female	Non-Hispanic White	83	11208605	2017001251662	W	N	21	45	'1756592521'	FFMFF	NA	2	12	552	263	263	21	552	5.10775530629935	4.21401623213371	-0.429853565177403	0.00193896008728611	43.9988134696726	165.619711619574	1.97421441181138	2.67739612557021	0.184485640067558	0.482787588189263	0.386681484588161	0.663891277817785	1.85742830878272	5.36647100267666	1.97421441181137	0.222274314931462	13.1540766577782	1.9760674807957	1.31944666073797	5.36647116088739	0.3361272234779	21.286745151011	41.367522108099	61.2247982736436	244.511467680962	0.0900741342470772	23.2077381465748	85.1358332861445	23.5449144111546	32.8479829444474	12.0679515837226
Female	Non-Hispanic White	118	11703306	2014000497592	W	N	8	15	'31300608'	MFFF	NA	2	17	553	97	97	8	553	4.85566628254475	3.3439114329175	-0.235457121356177	-0.0260276725392104	22.3864152214886	125.16571884185	2.88476620600841	1.63875507907575	0.0872256500879389	0.159307074670619	0.227324074190161	0.281870831552371	0.989171955828994	3.03582247061102	1.11682156273745	0.0526460403563955	2.70918444612729	3.03582325322216	0.542687693625032	3.03582325322216	0.132085693587417	18.8969077584874	18.7830557167885	27.9004858184224	198.188870632085	0.0479547077348363	11.4170692348378	39.4721717242352	11.2944179644931	14.6997673566227	5.53351730949657
Female	Other Hispanic	46	10603711	2016000535265	B	O	22	30	'21220152'	FFFF	NA	0	06	554	268	268	22	554	5.07539402554025	4.22160429211415	-0.240369072507517	-0.0630863002823735	53.5831803615483	150.251074568187	2.42418204962635	3.09950038758739	0.207335487509882	0.632056673007771	0.67420056384486	0.641359816543013	1.78979331481806	6.58943649842037	2.42418204962636	0.327414031027653	15.832777669319	2.42418204962635	1.10380492552101	6.58961001005874	0.294079737650416	21.103612379197	45.2070077331995	62.9030373585519	227.288992966388	0.111021695498543	26.2990316839561	91.0156815589044	26.0272687176634	33.8078936238894	13.7747474206692
Female	Non-Hispanic White	48	10608301	2016000485996	W	N	10	17	'103133'	FMF	60	2	06	555	126	126	10	555	4.9722103608102	3.68311578165585	0.00667477330823213	-0.0173208027334245	40.0364606411442	141.866937450307	2.0453828029019	2.44495471426064	0.179093657598778	0.341671745426084	0.464144012215563	0.543508751459844	1.92715681481459	5.55654390780049	2.04534768199381	0.135246733211477	5.94042370780725	5.55983143610473	1.13312293279385	5.55983143610473	0.266093969883107	18.5744034111422	39.7083318701821	53.6229665338291	217.708862948293	0.0905928016507441	20.9267757888415	78.8155639992265	22.2149601155744	27.3835004346319	11.1322579530386
Female	Non-Hispanic White	1	10101700	2015000976351	W	N	72	18	'72'	F	NA	2	01	556	866	866	72	556	5.08565494243773	4.3341288967875	-0.015076244014889	0.0155404628938213	75.1174322824755	164.218097202244	3.34227820456781	4.28699114897969	0.31896011891996	0.794725555364053	1.14802440238742	0.948763707318267	3.63829354489428	9.0852532419049	3.34227820457148	0.371994391796457	17.6970290729363	3.34250331441796	2.18269814241583	9.08525410913139	0.390129153363558	21.4749191075161	68.5856524945112	101.551530735369	242.957872619203	0.178557273149661	39.9221021033587	139.015006716595	38.2662568505762	53.9163272378229	20.3008200570831
Male	Non-Hispanic Black	186	14000200	2016000435490	B	N	26	19	'060626'	FFM	NA	4	40	557	313	313	26	557	5.17542951923999	4.4452268138791	-0.388418943232797	0.00738944042688175	57.7895446348915	178.184398316111	2.14580839890886	2.96366630259512	0.12555754902185	0.634358534612922	0.764065472499631	0.818911203446472	4.20598718184339	5.78646498654946	2.14580839881949	0.319639429200477	19.8140009463672	2.14580839918659	1.67328667466158	5.83291197783097	0.439212139018583	25.9313628684301	27.9794189142117	70.4660951229748	268.648869925448	0.2869231927884	23.0742238715523	110.318478325199	23.0500095076189	36.1461796063759	14.4117250354848
Female	Non-Hispanic White	166	12200900	2014000921364	W	N	34	29	'386111346305'	MMMFFF	NA	2	22	558	410	410	34	558	5.10574494342705	4.29646148188176	0.127211126177437	-0.0276410311402327	83.4020265357418	160.469503037303	3.40699544020566	4.5931078485	0.292912759011388	1.19428228561764	1.13291136796568	0.929985398667221	4.6417532371584	9.26116306059739	3.40699544020566	0.458952806366638	22.6149566684524	3.40699544020566	1.59552611301477	9.26117379475231	0.44225420158969	23.4796413730179	68.2347944261485	93.5201670165223	238.786403903662	0.180772747769396	36.8685562569483	129.933157691	43.7780015636889	54.3699630544092	20.3386047320721
Male	Non-Hispanic White	84	11300402	2015001033561	W	N	19	15	'20201943161142'	MMMMMFF	25	2	13	559	235	235	19	559	5.18646141580174	4.33308189736039	-0.195892927472507	-0.0255606640973713	62.626528725147	174.321405211039	2.34116457468881	3.486941507055	0.126305464004856	0.790243355389563	0.722736513003719	0.657702895068825	4.87807188927301	6.36284743469222	2.34116457468833	0.255307377606733	21.0037526903126	2.34116457468833	1.28925989948032	6.36394511877444	0.433662788842204	25.7501607542837	29.4898266987229	70.7675687517981	264.268743904028	0.300666801416628	23.2406478532317	104.664862393386	26.474361852304	41.024901184923	15.4674155356373
Female	Non-Hispanic White	152	12600100	2017000076491	W	N	18	16	'6419216218'	MFFFF	15	1	26	560	225	225	18	560	5.09783284001357	4.1654877501943	0.274144563346721	-0.029375247388549	84.7437768055147	158.929004929081	3.50552942068088	4.71464518692264	0.304648514700787	0.774153093926185	1.02182152629585	1.12405503673739	6.12504346441655	7.1742719069218	3.50552942068088	0.426296455819542	22.6730046145916	3.50552942068088	2.40733040664941	9.52901692336516	0.484997260310969	23.1743162403854	68.1187167936675	106.573307627178	237.0650805876	0.158491227042629	39.9021060392367	144.841386495703	39.989093722626	53.1591809269623	20.7759653653979
Female	Non-Hispanic White	263	15151255	2014000124872	W	N	12	48	'5311555912'	MFFFF	NA	2	51	561	146	146	12	561	5.04851698650528	3.9056653247469	0.038119457117476	-0.0615747008455218	51.6135782300475	146.487820086529	2.37281308489487	3.33396133598712	0.208234790626809	0.53183260040655	0.698242540384502	0.612243327111118	2.46064778008993	6.44884931235948	2.37245149964986	0.231866120128892	9.79122495552944	6.44899180039863	1.2255907429422	6.44899180029554	0.300001619106626	20.7553776073673	46.5374596586236	56.6634195952481	223.00589918408	0.114875912319576	25.1694897389117	94.2727833413256	24.7528458884786	33.2732510184235	13.2267669987509
Female	Other	91	10800821	2015000402231	A	N	61	38	'6161'	MF	20	0	08	562	733	733	61	562	5.06663058837213	4.12588058369269	0.220702991819402	0.0325182510587529	77.2142152553665	163.882357717912	3.45988753069753	4.04503620569834	0.325407901842124	1.00320817823071	1.11012795385573	1.00499237000527	2.91936697546961	9.39764467541716	3.45988742214554	0.429896789982669	19.0948356773852	3.45988742211875	1.54715408393452	9.40494910788275	0.535878406553619	21.3169733100976	73.0135067264409	100.908264390955	242.585236703298	0.16176506182647	40.9130139662926	136.206777961248	39.8096073645971	54.6614682550147	20.982940231536
Female	Non-Hispanic White	192	14100100	2016000376144	W	N	40	69	'044040'	FFM	35	4	41	563	490	490	40	563	5.10035768675904	4.28891426390089	0.114624768820422	0.00739399959009303	81.7396366326001	165.298294364412	3.38090489230856	4.41260103140745	0.319572453707809	0.739838019753266	1.19437689021607	1.07349906660905	3.99003385248709	9.19024951849907	3.38090488968069	0.0575345963677401	22.2961624995078	3.38090488968174	2.26599159001484	9.19025232428728	0.497270181312612	23.1768518487724	66.7099921814904	100.423299499429	244.155489740253	0.164233715051496	41.0089774662972	153.700053561318	43.2005678775551	51.6462595594946	20.6366622276301
Male	Non-Hispanic White	192	14200102	2018HU0264378	W	N	46	57	'4617401522'	MFFFM	21	1	42	564	552	552	46	564	5.17991463842215	4.54117626087974	0.16377993827387	0.0229432213344313	110.493445135061	181.791033483926	3.88412571113955	4.73117243137207	0.215348948870789	1.58346493091703	0.916519832125761	1.27638159719863	5.30070621145923	10.5578214835437	3.88412571113955	0.643017965939291	35.7244371371663	3.88412571113955	2.61052265929217	10.5581483399574	0.668390488070781	27.4474430933502	51.2663612245981	124.86397045123	272.716934074407	0.524019413895518	44.256805098928	179.127201437037	37.5044488992835	70.1852178402877	26.4816713875389
Male	Other	45	10611106	2016001023973	A	N	52	22	'5282'	MF	65	3	06	565	628	628	52	565	5.13681465862818	4.30364590933303	-0.0420888051478333	0.0389317016887157	70.9203278624421	176.928617508349	2.68314623863687	3.44978743589971	0.144005739441602	0.867842080302605	1.13668995539005	0.811192581446464	3.38048880634654	7.2932700494389	2.68314623863687	0.470449983619917	24.0360588717233	2.68314623863687	1.91923845389995	7.29354766292103	0.441559572955313	25.4317787980398	35.0956562900169	82.2682250629046	267.22760839588	0.374989732153783	30.2101774662939	137.492947959137	27.8689723813651	46.5985510796998	17.9252688081833
Female	Non-Hispanic Black	190	13500300	2015000815217	B	N	23	9	'46235215'	FFMF	NA	1	35	566	279	279	23	566	5.09964728684212	4.36383630731342	-0.0825458082097045	0.00996296172610799	72.33372641047	165.605797197256	2.99778552508994	3.69287345590996	0.286182394529237	0.895894640808238	0.804351032991744	0.852659694884496	5.38200777430456	8.14882587465397	2.99778552508994	0.24083023227822	19.5609406501038	2.99778558685088	1.69274242392697	8.14882590960226	0.444923257927061	23.1290531977933	68.583083678213	84.6559124610302	244.496060676323	0.154412981719494	37.2730288461164	120.097146907679	38.0781828103208	46.3114114505597	18.3236687909248
Female	Non-Hispanic White	263	14805700	2017001264964	W	N	4	23	'29341504'	MFFF	30	1	48	567	58	58	4	567	4.67925253599897	2.9158522709779	0.167159136248092	0.00431394635906535	21.8240245643431	108.155118856199	2.09390748792525	1.49483989889884	0.0754140711975829	0.274769671144129	0.134372078579234	0.231672675606538	0.782792958470274	3.2031671663421	1.17869769060348	0.0580971272454704	2.65952759433858	3.20321881105439	0.579368236073423	3.20321881105439	0.127789571496206	17.4046165765202	18.283587938592	24.4632839130668	177.623540986593	0.0433201505063266	10.1018172672355	35.0509375646437	10.1512037048841	13.2128205637528	5.23278217344452
Male	Non-Hispanic White	44	10606703	2014001108000	W	N	86	32	'7486'	FM	30	2	06	568	1040	1040	86	568	5.05179251934249	4.04113422668528	0.0623721146844085	0.0104957459028571	60.5522326026483	157.951538124155	2.4225184881342	3.33193686032574	0.122859502828595	0.464248241042399	0.640936027810634	0.642637218576332	2.80692102424827	6.56134763642483	2.4225184793544	0.362859223486993	20.8215087517112	2.4225184793544	1.39205459068849	6.5850879615353	0.235383222806029	23.9955709806537	28.6849745831677	69.9209313569372	245.42887486859	0.280167230354181	24.2667941635831	106.166045372406	23.5798570233975	38.0220079921057	14.8638996184079
Female	Non-Hispanic White	45	10608101	2016000600161	W	N	28	51	'5828'	FF	NA	2	06	569	345	345	28	569	5.10494238437977	4.29481031786846	-0.337334233856128	-0.0225991059484084	52.3250950055561	161.151236052622	2.27483546221276	3.10336671689538	0.226851949836104	0.454861201070029	0.56658585511876	0.696421518723154	2.92061157736511	6.17596508205549	2.27483546221276	0.319699250549758	15.2484504176049	2.27483546221276	1.41636714656927	6.18364389966711	0.318472402182196	22.0017053429696	47.7730432429595	70.4470150752466	239.546839422122	0.105881044743215	28.2666344012446	93.8317691637042	29.4948908349524	34.7259910650088	13.6232411294607
Female	Non-Hispanic White	235	14203800	2015000928054	W	N	67	18	'6770'	FM	NA	1	42	570	811	811	67	570	5.08308459418271	4.27750926864604	0.179037095617652	0.0576181192037336	86.1893279450917	170.835774737119	3.64345618266278	4.6464384537239	0.367984158387456	0.936407917695545	1.02499504088386	0.980276081367198	5.43992004914912	9.865816952125	3.64345618266278	0.370120703553629	19.8823180636485	3.64345618266278	2.90793656533167	9.90394073411894	0.530077624744331	22.6559254795542	79.7156043400712	119.361189541519	250.26454681719	0.182733098137553	45.9969524754206	153.673557158692	42.1609068372133	59.2995909536935	22.7956977600597
Female	Non-Hispanic White	175	12401102	2015000433506	W	N	76	12	'7679'	FM	NA	4	24	571	913	913	76	571	5.0799980605009	4.2974554071593	-0.347251498956691	0.0128153496034895	51.9459579619067	162.847374615695	2.46200557948533	3.2252018469829	0.234223927535772	0.486650951326192	0.349868695230542	0.761344189711659	2.98263045828987	6.68931003236393	2.46200557948533	0.205292686789164	12.7682022598942	2.46200557948533	1.3844027800362	6.69242502825842	0.307494585852144	20.09904152726	49.3413754263718	63.0906653320283	241.43530963038	0.12318311112843	30.8030910534028	93.3722200697742	29.9321286980486	40.1838154289666	14.8603769848691
Male	Other	181	13603104	2015000915362	A	N	67	14	'67'	M	15	4	36	572	812	812	67	572	5.13071213393703	4.3258457290037	-0.288972353234017	-0.0108561812181601	56.6489456567609	167.311267152062	2.21220861741779	2.81235152382144	0.117165310750394	0.835295791563342	0.508971952812206	0.619051469464416	3.85115583417935	6.01100960589514	2.21220861741779	0.395821416354973	19.1932737194648	2.21220861741779	1.37775829126583	6.01340648529893	0.174843355991583	24.6074156888895	28.994533911357	66.0074599865572	256.257540269386	0.284263186403828	23.4766605795949	107.729433251337	23.5460812658993	37.3510351744676	14.1723784715556
Female	Non-Hispanic White	188	13604004	2018HU0465657	W	N	31	36	'31717637'	FMFM	20	1	36	573	376	376	31	573	5.11962052674458	4.31539381536678	-0.13207662971946	-0.0246858749980829	65.5830439158967	163.193179886641	2.64462982698469	3.36839712481742	0.254336363050005	0.546933620364627	0.862523515832915	0.581278157023502	3.92561561301781	7.18884585495063	2.64462982698469	0.322861763737521	17.5457961283817	5.60833321982224	1.73864246418304	7.18884920169327	0.364926326099857	23.7985722790823	55.1224524039767	71.1450046047363	241.819722310866	0.134521090253849	32.1630184084107	102.399996677709	31.2491143227256	38.2583732686525	15.9880912594118
Female	Other	156	12901001	2014001196650	O	N	25	14	'22440325'	MFFF	10	3	29	574	304	304	25	574	5.0715173380777	4.13205795187789	-0.102927330446407	0.00443790335873697	56.2120204720198	160.125077055297	2.43337123610001	3.1497852314037	0.217962597160335	0.500455318027643	0.373525757084261	0.616174228903452	3.51020573011587	6.61444485322136	2.43332824130481	0.232743784680592	16.1818062878918	2.44755942410054	1.68675652013814	6.61447194101489	0.337333124545471	22.1008786722004	47.6637291054429	67.4813596664957	238.401908755289	0.111612639305091	29.7101352118429	103.509406985432	30.2361745083983	33.586308656145	14.50275243388
Male	Non-Hispanic White	200	13704600	2016000829102	W	N	57	7	'5752'	MF	8	2	37	575	694	694	57	575	5.17597408515091	4.4894528195665	-0.0353545222668095	0.0189675151126633	85.9785887557715	180.357609652579	3.06929053919224	4.3461374359273	0.178545009185831	1.01988039924762	1.00363609814704	0.896322103563863	6.43670255267676	8.34317760624174	3.06929053919224	0.45769871300098	27.4123027300429	3.06929053919224	2.1598746746013	8.34319669892189	0.700968932509358	27.0125285168992	43.0981799829415	103.530844679449	271.102557736223	0.441133856554774	31.2578280021487	166.196739163431	33.1773174622564	59.8181284651168	20.8023128902652
Male	Non-Hispanic White	155	12603204	2016001005533	W	N	49	16	'7345181349'	FFFFM	30	3	26	576	599	599	49	576	5.17760869504714	4.52696099223237	-0.0100247747364754	0.0022148461126075	91.5546642594785	177.65146005676	3.29126514161207	4.42989262302892	0.171595788029233	1.17979959125947	1.06753579202139	1.08553410301907	5.36883239365718	8.92686740374768	3.29126514161207	0.472760174660289	30.0245032482267	3.29126514161207	2.11276118660014	8.94658622507096	0.440393437335924	26.8174684567147	46.9856104359624	104.410289515773	268.046010512424	0.466221642254217	36.6039095175193	168.291053701328	35.0433342705562	54.4581204453882	22.0552622686931
Male	Non-Hispanic Black	192	13902800	2018HU1197199	B	N	23	46	'20000223'	FFMM	60	4	39	577	287	287	23	577	5.1705665436558	4.39734515592041	-0.252178888747527	-0.0280982645178242	63.1281171627822	171.137662953458	2.28931694213446	3.37841260663014	0.132224066100864	0.971699071930527	0.832844337921164	0.765375626597524	5.96080576978222	6.22291880353211	2.28931694208747	0.294613153491263	20.6465325733818	2.28931694208747	1.45081034936598	6.2230086430908	0.299151789847442	26.5750884476572	28.305274692584	67.6187938628375	260.64053572569	0.312771845276452	21.6493344937578	106.999633130264	24.958695583741	37.9584128910323	14.9172198557894
Female	Non-Hispanic White	262	14805000	2017000365201	W	N	33	22	'333212'	FMF	NA	2	48	578	407	407	33	578	5.10714716991986	4.30337908503175	0.0786052536818552	0.0577699233596127	79.9966163947348	175.022947391684	3.26492553744802	4.19261868010262	0.328202074341851	0.724506890688966	0.740115742543416	1.03725208221448	4.60381912661422	8.87498706560365	3.26492553744997	0.656407305495419	21.7331875709658	3.26492553744802	2.31086401779522	8.87498775969126	0.584365127383472	23.5018195598001	74.9064148807106	99.3126601322454	254.85106878688	0.167183965845151	43.3339703955275	140.570322485721	42.4051455116189	51.7358295375474	20.8017440682051
Male	Mexican American	188	13603903	2018HU0390346	W	M	29	23	'2931'	MF	NA	2	36	579	349	349	29	579	5.1395970338974	4.46676552410209	-0.176875712809451	-0.0571117088602795	72.958428861735	161.174128664588	2.7696586393322	3.67106084233802	0.133130208647557	0.809641441617004	0.700100260289671	0.860306657011966	3.10613558238857	7.52774756667095	2.7696586393322	0.265160480362332	25.6236023167541	2.90230920043604	1.56793621474003	7.5287127503183	0.456322110139442	25.3420292398651	34.0646419487075	86.2220333014771	249.174881354449	0.349729512025504	29.7127887086783	121.627530333031	27.1534863545077	45.1359795988689	17.2532340711982
Male	Non-Hispanic White	47	10605904	2016000570351	W	N	11	23	'461108400709'	MMFFFM	NA	2	06	580	139	139	11	580	5.01702812040556	3.79914346908599	-0.0241534155048464	-0.0266425940100992	43.5970746788014	146.993082286435	2.07739031007337	3.15396298059529	0.107761334352535	0.731163164625401	0.426492928837604	0.438393624379388	2.73412164451063	5.43110149276091	2.07739031009514	0.161804102432481	7.35518743610858	5.61643603153622	1.0459844775817	5.64693233048934	0.258859590345528	19.9864629002078	24.826624944776	58.4548557794377	232.54415842866	0.224888771980727	19.3989636177445	81.0525700444126	18.1179169367309	32.0038782316892	12.0771245345966
Female	Other	55	10603723	2017000754417	A	N	30	14	'3930'	MF	NA	0	06	581	369	369	30	581	5.06927952877295	4.05733998771944	-0.446721074370556	-0.0531181431260418	36.9889386798184	150.831208283872	1.60048391915052	2.01986780063652	0.141634617763416	0.417764847018495	0.283633235739729	0.424148762765299	1.66063915554798	4.35056216190348	1.60048391915052	0.271498288679602	10.6283793164317	3.85225106292592	0.792899820127752	4.35056635416777	0.211231622207936	22.1110964835834	30.9992788728982	43.8988056857943	227.946864154773	0.0695625829184899	17.7277243419101	59.8179315866489	18.1567922422436	24.9157474045225	9.12063226251253
Male	Non-Hispanic White	155	12702200	2018HU0955683	W	N	54	34	'16481454'	FFFM	30	3	27	582	651	651	54	582	5.17422104918277	4.50699034726765	-0.258595822361706	-0.0095318990648404	69.992950154987	174.983056654296	2.54816169953303	3.65695525089667	0.141854045521301	0.904820563579215	0.830352223919901	0.903033116132975	5.55301082369178	6.91805613049898	2.54816169953303	0.504051691615606	22.906846253691	2.54816169953303	1.66939574627112	6.92662164381479	0.502698190575254	26.4680174997583	32.3833105947094	80.7266323000094	265.020678100655	0.347813306744004	26.5910149488881	131.817162177171	26.3195812888209	41.7394468982057	16.882888538009
Male	Non-Hispanic White	187	13402103	2017000074181	W	N	49	62	'4945'	MF	NA	1	34	583	591	591	49	583	5.18164828272441	4.49062470399438	-0.196538488851894	-0.0101450628996839	73.265235184874	176.17947500959	2.73303439023851	4.03037839866039	0.146125428058275	1.11962819786147	0.653864796307536	0.813472978284581	3.65300934616426	7.42761593220502	2.73303439023851	0.479320843875918	25.0545980380289	2.73303439023851	1.64282342167202	7.42915761124855	0.47199148520182	25.8072862334089	38.4011674559512	88.9157796078351	266.378546905783	0.36980410927156	27.822672385958	147.533655416331	26.9679053102093	46.3721494490703	18.2005432378817
Male	Non-Hispanic White	79	10900500	2014000633346	W	N	68	4	'6867'	MF	20	2	09	584	816	816	68	584	5.1680496626671	4.48433203672856	0.128956770926843	-0.0455154933011549	100.81516670433	167.759963557881	3.66377131728235	5.04695501146259	0.202346066960176	0.988221330112685	0.717492532431754	0.907881107983326	5.73355203467656	9.959157094795	3.66377131728235	0.622940907298002	31.8796953166704	3.66377131728235	2.3148702412024	9.9591629953975	0.467712138647281	26.5167738304996	52.9037776044079	108.564775881237	256.772792487761	0.488415134121865	37.7876264078144	186.183545508679	38.1035074965441	64.8958535949044	23.5189198043788
Female	Non-Hispanic White	10	10101700	2015001286416	W	N	44	12	'471044181416'	MMFFFF	NA	3	01	585	529	529	44	585	5.10858581833344	4.29780567584189	-0.194701168587452	-0.0566773616297932	60.5279055378838	156.320510918557	2.54764283634852	3.51791348978101	0.240734833215462	0.603505978750004	0.639498610885064	0.754093203946341	4.39469976238868	6.92481100585415	2.54764283634536	0.411853677145153	16.9575248095121	2.54764283634504	1.38458849348422	6.92521122744032	0.335335307776858	22.7583952798892	47.5619665251401	68.4848591749909	234.140849012352	0.121564490771972	28.0734357373624	113.082536490344	28.6460732985584	41.2918951919063	14.9126814170516
Female	Non-Hispanic White	115	11703306	2015001242579	W	N	32	15	'5332'	MF	12	1	17	586	394	394	32	586	5.10983743259601	4.31175628109771	0.0749334850524879	-0.0360134236145149	80.3739216634737	159.784176692221	3.41403914336491	4.17669579237043	0.325123632487933	0.604728387964174	0.690189207780324	0.977175732438816	2.86260544229541	9.27986891650688	3.41403914336491	0.410119888318998	22.9445759393406	3.41403914336491	1.79230899314827	9.28032056505663	0.47726600305796	22.5421793038543	64.6561347280763	96.6435884638611	238.021145732856	0.159728198466818	39.2487963545062	149.498734594732	40.5056904051387	52.7332788668995	20.3153377120133
Female	Non-Hispanic White	45	10608503	2014000408453	W	N	53	20	'5359'	FM	45	2	06	587	638	638	53	587	5.09538345726891	4.29643883481695	0.0934336076317369	-0.0305390589605594	80.6301333421144	158.355799726216	3.51791355356537	4.1854621088639	0.318928273635311	0.922089189423768	0.848506025231043	1.0751058712418	4.11808670794009	9.55487079166191	3.51791354861252	0.329828777293402	19.8360904859035	3.51791354861252	2.03427165964984	9.56268047328328	0.441016368582728	21.9198734499645	63.9675199874838	91.6195317714155	236.423528598311	0.190954129728638	42.486061104947	141.707987097095	39.3895857752672	50.0372000950865	20.7929383616694
Male	Non-Hispanic Black	11	10400114	2014001176000	B	N	47	31	'461647'	FFM	NA	1	04	588	571	571	47	588	5.16638102608569	4.5439482946771	0.812175153174054	0.0477245103595231	160	183.847302700901	5.36465896615147	7.70123606741718	0.297882659012099	1.07863932732534	1.81190026432831	0.929204977432183	3.11380689431624	14.5825734331158	5.36465896615147	0.473037668000335	49.242599661135	5.36465896615147	3.87885722792681	14.5826549835693	0.506735546356549	28.824822231856	74.7151744258012	170.021374972356	275.027238886007	0.728207486367896	60.5701061081656	296.76492225206	62.5091737775765	93.1641631704617	36.8856835756424
Male	Non-Hispanic Black	181	13603703	2014000912627	B	N	67	33	'67'	M	NA	3	36	589	812	812	67	589	5.1610129095286	4.47434614894799	0.137734988337902	3.80253731109555e-05	100.693488702951	174.347587323046	3.50704538246033	4.51227305781284	0.207645258806768	1.10777723647688	1.50733561185834	0.792573487424903	8.26661051652529	9.52903236054475	3.50704538246033	0.599673861050514	31.1518806110435	3.50704538246033	2.21950699920751	9.5331377323634	0.640438613818157	27.7117723672884	45.1906593495215	119.99402722867	264.298512124192	0.458905577425393	38.4350347303143	180.100489246726	38.8684339476549	62.5188405879359	23.1726719134071
Male	Non-Hispanic White	264	15530000	2016000147653	W	N	45	44	'45141645'	MFFF	NA	5	55	590	540	540	45	590	5.18832643013549	4.54327060576132	-0.145192144932879	0.015022245351944	81.2945079050449	181.880281283208	2.91643611715053	4.04514632669629	0.16490629090894	1.1434866800111	1.2817687950079	0.748073430489972	5.32425564167806	7.86592909605009	2.91643611715053	0.662291681883225	26.6086558635261	2.91643611715053	2.28282302982087	7.92769529863957	0.430490069658813	26.8746060738244	37.2258066540638	108.411374253079	272.817342875091	0.427039288364607	32.9192990918547	148.442296467246	29.9029196699943	49.0013527894043	19.8913588036488
Male	Other	47	10606705	2014000722779	O	N	49	20	'49184515'	MMFM	80	2	06	591	592	592	49	591	5.14424890334103	4.38893929896403	0.0601948509309984	0.0227844577436268	85.5528359915924	175.393735024998	3.10321107419455	3.93564715431559	0.166769019302551	1.28552934412743	0.654762554860798	1.22886648178629	5.39675991021965	8.43535022669677	3.10321107419455	0.320589716402706	28.512508293104	3.10321107419455	1.88905330967383	8.43540227285502	0.400793531810177	26.569132084835	40.5346264835288	98.816669206664	265.487036231224	0.434005825737118	33.215717787352	157.826900913403	33.3772150031718	55.0200539077676	20.5965577721956
Female	Non-Hispanic Black	274	14802006	2014000534578	B	N	42	44	'42085212'	FFMM	5	1	48	592	511	511	42	592	5.113763415312	4.4393273914673	0.496170840413635	0.0426405120978648	139.142450469748	173.539272356031	5.12228279741213	6.89294087813203	0.495278718165948	1.37006626085149	1.18912119576109	1.31865507664833	7.97700572031527	13.8710692241933	5.12228279741213	0.509193569108011	33.5744568994568	5.12228279741213	3.25721888444537	13.92380824792	0.776336524846364	26.1641484808384	113.747240777942	152.012408431997	253.229060391661	0.250153733816923	63.1046954333356	220.756633031301	66.2833977434422	81.6361602921387	32.4277714962261
Male	Non-Hispanic White	189	13904400	2014000409281	W	N	54	25	'755354'	FFM	NA	2	39	593	649	649	54	593	5.17571902705489	4.50886656459139	0.027096329984514	-0.00764455073360389	93.3133229523672	175.57643520441	3.21943953282291	4.35648803263022	0.180399286419989	0.932493825413321	1.2986916998771	0.721027299605112	9.31827582642772	8.75059856149063	3.21943953282291	0.33810675461633	28.6054749606871	3.21943953282291	2.58056339564613	8.75134397989512	0.482520958326476	27.9843378019736	41.9282878735931	107.486099522018	265.694419135662	0.420326644823717	31.7991846689288	169.845711463943	33.9464578753246	56.677668152479	21.3846779153943
Male	Mexican American	227	14500104	2018HU1232816	N	M	34	38	'34050333'	MFMF	35	1	45	594	412	412	34	594	5.13469047996887	4.43208905342831	-0.0906264589735282	-0.0114826395472624	76.8198134457005	167.873016665658	2.83999795523777	3.9960183253581	0.158336588461867	0.857402165893738	0.398112816009428	0.517406784574649	5.38334587084556	7.71991431439227	2.83999795523777	0.434259568195581	26.2494886151881	2.84000387036328	1.51862005408292	7.71991483458353	0.253094455983913	26.0492495616141	38.0847119431058	83.7466140734516	256.902560566512	0.341003830306705	30.1515104065809	146.607029788396	27.7913718333996	45.1286491043506	18.240068667606
Female	Non-Hispanic Black	217	14202702	2015001165678	B	N	28	40	'28'	F	5	1	42	595	344	344	28	595	5.10226989175763	4.42641660420474	0.0589762157323123	0.0633394785774861	88.7117917298519	175.14415371171	3.53196647832076	4.46872785929334	0.335268848155002	0.806422972070296	1.01669016737082	1.07688346537742	6.21885823840083	9.60053106626095	3.53196647832066	0.389277515941155	23.3583853651521	3.53196647832066	2.49705370831698	9.60088029493557	0.48857380807946	24.1168272050055	74.1010142998379	103.150233481176	254.983423804429	0.193364537137272	46.361042390524	148.743298212543	49.4469235709062	56.9600640694195	22.5148226351169
Female	Non-Hispanic White	82	11200102	2017001371905	W	N	0	15	'392200'	MFF	NA	1	12	596	9	9	0	596	4.24541746182526	2.10684366460212	-0.380677160062555	-0.0257863314400786	5.61907188100877	68.0083934321869	0.967762535491034	0.1273675130956	0.01655732889597	0.0717431543555829	0.0159810238780453	0.0453577718339704	0.0922775369305885	0.967762535491034	0.96003735031803	0.00298762725541755	0.161606467909579	0.967762535491034	0.130122604511572	0.967762535491034	0.0299597830692061	15.7830257183921	3.92276062638893	5.32212147418551	125.425863933417	0.00836466510005497	2.02256011445559	7.83136048556585	2.31019993294656	3.03221261265638	1.11635271613068
Female	Non-Hispanic White	191	13701702	2016000144327	W	N	4	18	'0131422702460418221508'	MMFFMMFMFMF	20	2	37	597	55	55	4	597	4.66461250293526	2.88690810412768	0.0383260369789558	-0.00205087057769571	18.6385895990308	105.907029848864	2.43809980719126	1.51593096692079	0.0776910902572844	0.190690400462475	0.105689510271208	0.165794074759889	0.62626003647314	2.84562213068641	1.05187671856976	0.0362864771393368	2.40840277244312	2.84565996104042	0.434021528932482	2.84565996104042	0.133840627687672	17.8042844573135	15.1886147293276	21.3439041256904	174.847249869705	0.0379923506236389	9.06346436350952	30.0412651489084	9.4697008636958	12.6543668803882	4.57601390925594
Female	Mexican American	155	12700100	2017000333861	W	M	28	6	'33022800'	MFFM	NA	1	27	598	339	339	28	598	5.0629612484031	4.25205069273148	-0.013156112670846	-0.0455646594837576	69.3311694063373	151.017630596952	2.96090369603289	3.87715029245704	0.264151374042872	0.657411214250232	0.601801885693439	0.647268774251643	4.20043623775452	8.04857067962397	2.96090369603487	0.229469646019423	19.4618954023249	2.96090369603291	1.41417388610311	8.04857070627938	0.388357483364399	22.4155435380182	56.1072015609938	78.7101290428408	228.158132533844	0.133656003178985	32.7237095211912	119.99079518974	35.0598738011311	45.2995851328905	16.8888564474856
Female	Non-Hispanic Black	154	12501400	2016000800020	B	N	16	65	'45461613'	MFFM	NA	2	25	599	201	201	16	599	5.0928483982058	4.19332197642121	0.118456882041204	0.0367400396834457	74.5730258813232	168.947571315412	3.16960371976674	4.44861622556644	0.300930731655954	0.611253070793373	1.06098971650026	1.06250653266026	5.31522708534006	5.78497665683566	3.16960371975944	0.436770432164124	20.3608516059942	3.1696037351373	2.26203433707463	8.61587618872455	0.525332212914327	22.5275550115088	60.3309551144529	89.3495703746108	248.187085559769	0.156839241312499	37.839722382855	125.878026484261	37.8971069974944	54.0518749459011	19.6663677396625
Male	Non-Hispanic White	263	15000400	2015000437201	W	N	5	13	'330401100530'	MFMFMF	NA	2	50	600	66	66	5	600	4.73824709093827	3.02720202089723	-0.143454711104453	0.015829711246785	17.8811540132873	116.056460621196	1.22053619253407	1.49019097921205	0.0437138886735235	0.276321130527988	0.0626443942399826	0.20187353748224	0.693631109080761	2.81493176233776	1.03564004320256	0.0516052544877128	2.87386312948143	2.81493176253866	0.515176946935602	2.81493176253866	0.100866512978223	17.2672093416434	10.2768693638308	25.1629134136762	194.775690740363	0.108080704957831	8.19664587028342	37.9344856547065	8.13730578591659	12.407706501865	5.04252606090395
Male	Non-Hispanic White	218	14400300	2018HU0316231	W	N	80	10	'80'	M	NA	1	44	601	962	962	80	601	5.14071284931104	4.3674134837818	-0.133631412618237	-0.00740010400802179	68.9776177240504	169.577957154483	2.58845670135581	3.23775218351065	0.138336760095717	0.732035468430981	0.482677699764419	0.557902635262005	5.71296464096662	6.98251405609304	2.58845670135581	0.529031468794408	22.7852097264333	2.58845670135581	1.53082535270048	7.03615480656408	0.506744008463198	25.6481636288979	33.881189012729	79.8152925756879	258.856938968837	0.324749733267721	28.0984360140171	118.710356881356	26.0872747224835	44.1096417005715	16.7509994591584
Female	Non-Hispanic White	166	12201600	2016001320858	W	N	4	11	'37040337'	FFMM	NA	0	22	602	59	59	4	602	4.68408936574749	2.925486809478	0.159424370752124	0.0580304749480125	21.8655246649558	114.677041257509	1.25622204062423	1.48696123732775	0.0929987692762898	0.230616594126785	0.116241666936376	0.288413503439022	0.690608288934868	3.41013171625572	1.25911172555409	0.0534613326079466	2.87530667067414	3.41020480458438	0.56551209247045	3.41020480458438	0.144862135612586	16.4044649506041	19.8167549080254	28.3834595275723	185.597693150215	0.0473203075383836	12.6822840782428	37.1015556982716	11.7361844117073	16.0414773968739	5.82101291222108
Male	Mexican American	260	14805306	2015000907203	O	M	65	39	'6566'	MF	NA	4	48	603	783	783	65	603	5.12564096026416	4.45902648554562	0.107471357707446	0.0671226714748339	96.2065885385382	179.965223912591	3.51102800932688	4.83851868486048	0.206687757457424	1.29778786857185	0.686451307153709	1.31898806039156	4.44582089815489	9.54274422743478	3.51102800932688	0.306636540560912	30.9895518020177	3.51102800932688	2.49708605714579	9.54396363696301	0.612390389610579	26.4012591990066	48.6244189698712	119.818624115713	270.660079595146	0.483009666711488	37.6777520677401	182.577914106049	37.5544386549631	64.7331421334656	23.7573780116301
Female	Non-Hispanic Black	47	10607104	2016001216289	B	N	6	38	'41060945'	MFMF	15	3	06	604	75	75	6	604	4.7782870947885	3.16912443867053	-0.48163877340069	-0.116990403691935	14.6946820829768	105.773148370933	1.98975813667925	1.13237436602874	0.0497591673196518	0.128622105516022	0.0851519595802394	0.132562376678983	0.714963009403991	2.23471455475423	0.822989126033701	0.0346448071837138	1.89530524601851	2.2347145550726	0.336059054153056	2.2347145550726	0.100561823508071	17.8744471818419	12.2424160966687	16.5305216242828	174.681449904298	0.0317518464717956	7.19491504485316	25.7388565151121	7.51470485991327	9.69847370011625	3.59016469995325
Female	Other	271	14801903	2018HU1240304	A	N	72	62	'7372'	MF	30	0	48	605	875	875	72	605	5.03495399248655	4.01810605408301	0.248922056199902	-0.0235492684986186	71.3093967372589	150.115458896818	3.13240342535118	3.80741352600572	0.27422729855665	0.943655336451083	1.04044828793026	1.01479034376223	5.23699738947758	8.49880267971135	3.1324034256802	0.324407608355419	16.7063785264287	3.13240343476872	1.54502857917654	8.51475530971436	0.374497606360467	21.7650743068844	62.3271543645686	92.2833720219724	227.135113392844	0.148561255447941	37.9955733985038	126.551583066076	37.5606699196512	47.1812911085966	17.7869701802318
Female	Non-Hispanic White	190	13603204	2015000378049	W	N	50	31	'695015175078'	FMMMFM	5	6	36	606	611	611	50	606	5.09526438822501	4.29336514012526	0.104101639299914	0.0290838298491175	81.2447967716093	168.0645645	3.44601104668622	4.8415764833259	0.320262507753366	0.886729006395346	0.984846216581974	1.00799015168863	4.74972411383406	9.36010675696838	3.44601104668622	0.265925781694631	20.0422607983993	3.44601104684154	2.12265877131532	9.3672292088414	0.352830831355919	22.5764760097727	72.6098472028663	103.340295123999	247.213583661615	0.169289511245811	41.2141875056026	137.778679858141	41.0318587109338	56.7535607528719	21.2975185047204
Male	Non-Hispanic White	154	12500304	2015001509917	W	N	2	27	'343415020500'	MFMMMF	NA	2	25	607	32	32	2	607	4.53966955728745	2.6743482289058	-0.174843437535701	-0.0450771851899299	12.1764625780801	89.5316659406285	1.04638333097536	0.942417997973534	0.0260134334688819	0.15796330878439	0.0359626016891759	0.115657083682484	0.30551264883162	1.90975205023337	1.0917172575234	0.012744857353689	1.96518187128433	1.90975211120763	0.301390150775675	1.90975211120763	0.0441919081580162	17.3315985706525	5.37294578064307	13.3095406827119	160.330172963208	0.0552511273549576	4.45864391454076	21.715536316633	4.28491488786396	7.98161656747186	2.81603330365809
Male	Mexican American	188	13604106	2016000833802	W	M	95	21	'241995275370'	MFMMFM	NA	2	36	608	1140	1140	95	608	4.91879499856352	3.76577434932755	-0.169860845288956	-0.0229135553795158	36.4489810757758	133.737836981382	1.39118484140146	1.8034661236026	0.0626588140847954	0.401474538333346	0.362951903418364	0.346215825932727	2.61102609152355	3.77934995800825	1.39118484140803	0.0830028893511449	12.0301259898685	3.76803329804019	0.721132046744752	3.78163247440926	0.141112032119231	25.1999535309165	14.6420160030165	39.1159501351864	216.632435840161	0.154863777584466	11.1464021443716	61.4272860474741	12.5279285671395	20.1599230116286	7.53439402241766
Male	Other	264	15311611	2014000121965	O	N	40	18	'501740154740106203'	MFFFMMMFM	NA	3	53	609	482	482	40	609	5.15343583506866	4.29265629900384	0.238902504619485	0.00554529976287284	92.9032662173645	173.987095875878	3.31636556478114	4.52817100005873	0.194707904649631	0.890404405817609	1.13104070187517	0.954298217571636	5.20296544764888	9.01476729621937	3.31636556478114	0.514283512420148	31.1306920355198	3.31636556478114	2.16907544745002	9.01481622767616	0.41182569320152	27.0135782387716	43.976455891595	105.255191613082	263.888546602312	0.43717037334033	35.6911232713957	159.360075966968	38.6505391137986	62.6380102706056	21.8787722223013
Male	Non-Hispanic White	9	10500300	2015000648925	W	N	47	17	'497047'	FMM	NA	3	05	610	564	564	47	610	5.18116519458621	4.49456468290241	-0.136481051892069	0.00141708919352697	78.1073084842008	178.142231355714	2.96495710187184	3.84025309685409	0.169853471502312	1.04366742979448	0.884559594041175	1.10486802436036	2.46364524998424	8.0595074830185	2.96495710187184	0.645089522512805	26.8516198450246	2.96495710187184	1.76939732514577	8.05958901217665	0.47094352937726	25.3434868703126	39.8257013690018	95.7830790615023	268.601187125373	0.400536725139005	31.2730590765555	160.740410827825	31.9504290760699	51.2230924400126	19.9097749334645
Female	Other	259	14804617	2015000224029	O	N	27	41	'2727'	FM	NA	1	48	611	326	326	27	611	5.09039225015683	4.14856258576722	0.0459307014135445	-0.0338029774929185	66.3201178078837	157.053933630239	2.79453372380555	3.66508095512467	0.246886633426621	0.533281763287772	0.707945024861949	0.745550799145697	4.5387349999391	7.59351247484932	2.79453372380555	0.363853018806389	18.7061074242469	2.79453372380573	1.26314812564017	7.59633024043441	0.47086258119663	22.732087125279	55.9226710977794	85.9443357233836	234.964271191806	0.127777307270911	33.5950494565811	118.689710161526	34.02226108743	46.3466038739692	16.4153894933724
Male	Other Hispanic	58	10601304	2015001289941	N	O	55	60	'135552'	MMF	60	0	06	612	668	668	55	612	5.14154299804154	4.45430029084883	-0.274775915249275	-0.0814219579321997	65.3347710115783	157.609592251147	2.40895744352113	3.21393388915035	0.121922187348098	0.856568445917827	0.48681196740604	0.688048515378574	2.80983577641441	6.54822177850646	2.40895744352113	0.326507139309885	21.363861423461	6.2891011684075	1.33708954193393	6.54822524425465	0.120503504918837	26.1215961856426	30.5571199745808	67.9223239069506	245.030274182845	0.302067277195825	22.5179607332325	112.63557624828	25.9124020142277	38.0412503229594	14.7566875720197
Male	Other Hispanic	60	10610702	2018HU1274081	W	O	16	40	'164038141611'	MMFFMF	40	0	06	613	202	202	16	613	5.1523401371942	4.25228260675504	-0.138038969776953	-0.0463891840851512	61.2059028691938	165.000904071873	2.57557030134928	3.53896792492283	0.13994441447757	0.978242634781663	0.877185001861851	0.761782015983973	1.03816265943111	6.99962787990921	2.57557030134928	0.317614780209667	19.7497759907484	2.57557030134928	1.67218022325086	7.00112594804351	0.419927222388505	22.7640195016648	32.7597085088429	67.0183349870882	253.598981339225	0.3426531696242	25.1148766395731	121.075110091534	24.4043807911967	41.0181191820223	16.3290501197435
Female	Mexican American	286	14803700	2017000737022	W	M	17	51	'591708393110'	FFMFFF	NA	2	48	614	215	215	17	614	5.0705638916988	4.06584119181116	0.354833194651125	0.0270478669698679	83.1523432684789	163.630650795089	3.34335283664615	4.48924123146513	0.294817571278218	1.0055098599568	1.19545965772859	0.892215117015629	5.85745728316687	9.03777749808039	3.34335283664615	0.435458127586469	22.027277639579	3.34335283664615	1.90855215201149	9.08817526198222	0.480632253242672	23.870944626919	68.4701653285286	95.9266417622498	242.305743010492	0.171535504690199	41.5043272627408	154.976494881574	38.865503694756	53.9421723497468	20.2528398307445
Male	Other	20	10400116	2017000208443	O	N	22	30	'59512224'	MFMM	25	2	04	615	270	270	22	615	5.15588758553684	4.3243095417663	0.00543214429286686	0.000963077677802952	75.9246716347543	173.616815881973	2.89221282151939	3.51260383547215	0.17276303281397	1.09646561832255	1.207036516287	1.08498874122622	1.62662862830741	7.86030856938283	2.89221282151939	0.268739552414937	26.6547727809642	2.8922128215818	2.07536588010294	7.8618495567693	0.613553124281628	25.2514124375081	35.696977085953	92.7459629956025	263.467228000779	0.382734128182294	31.1596288141708	130.468417461062	30.5243857520825	42.5331474420615	19.0500823718506
Male	Non-Hispanic White	146	12602300	2015001316715	W	N	67	5	'67'	M	25	4	26	616	805	805	67	616	5.16351019298843	4.46532172695952	-0.374320747860908	-0.048300280637255	59.7997200255483	166.535735222263	2.27558079149414	3.16854082717937	0.128950858913289	0.740422325907493	0.838417329045491	0.607696475146401	3.97088565709628	6.18298676041365	2.27558079149414	0.398297782719683	20.1191627376974	2.27564737274627	1.42768671192177	6.18566983607597	0.532895547540239	25.2788824062292	29.1908992868503	67.8925166227347	255.366157039777	0.279791944972372	22.634300958412	109.642998698861	21.3747793126301	38.6686181868029	14.5276580439348
Male	Other	251	14500603	2015000153548	O	N	18	52	'18154948'	MFMF	NA	1	45	617	227	227	18	617	5.18045023160639	4.46209878285516	0.0962485154924366	-0.013789253805848	95.42563932257	175.328433489292	3.55531927988341	4.90065282263032	0.207404869222532	0.87956989082156	1.7267202106049	1.39386950420414	5.02912898103057	6.7133113919824	3.55531927988341	0.454287326727872	31.3161297320237	3.55531927988341	2.35865169518182	9.66435978456419	0.614651075941923	25.8402446617113	43.7748770010285	115.844215857823	265.412899383623	0.477949209649023	38.788583217596	175.618855441021	35.9460570597453	61.042354566539	23.5906899577087
Male	Mexican American	225	14801200	2018HU0722523	W	M	43	20	'4643'	FM	15	6	48	618	525	525	43	618	5.13923848611342	4.42536451196151	0.160621526623736	-0.0186218759365898	98.0998697246529	167.438582130628	3.36060554901056	5.1657489851777	0.192701701239077	0.790100287674242	0.974426369755961	0.857656187918033	8.82364571762703	9.13487736075443	3.36060554901056	0.4594397711216	31.049805331478	3.36060554901056	2.15557771416725	9.1350729960202	0.423671677644704	28.191128888523	45.6191090507227	106.834293475147	256.403775135285	0.429810108350028	35.864083831901	166.089776843474	31.849664920192	57.3999025741913	21.5417987376723
Female	Other	188	13800200	2015000582024	A	N	84	15	'8584'	MF	25	3	38	619	1009	1009	84	619	5.28880758217296	4.19184537240328	0.197681935644083	0.0047714437525156	80.6023099110021	199.054573520716	3.48819386838823	4.02730766618949	0.375403479051749	0.74274666462521	1.3521226470825	1.12760841356794	6.09656835862439	9.47610261582555	3.48819386833315	0.531634923022494	17.6537871149359	3.48819386833315	1.93825352921621	9.48189386966525	0.631750445170552	22.1071760783521	83.5865002072928	119.24026867562	280.66892729858	0.205983820930964	48.4337156898267	156.69738506488	51.4551439938729	68.2410607867508	24.4756907808637
Female	Non-Hispanic White	191	13800100	2017000208770	W	N	34	104	'5632063400'	FMFFF	10	3	38	620	415	415	34	620	5.10564250288	4.28510711202876	0.193889709778325	-0.00843573721141814	88.1462019595303	163.564394944402	3.64623179556217	4.22487501550398	0.323480964653432	1.00867593867826	0.933919975029357	0.926014261231027	3.91132446342298	9.90968801632694	3.6462317955622	0.627947507979868	23.7939801514968	3.64623179556217	2.25866528137305	9.91148563222599	0.625347809944398	23.1746018634397	65.0531755723172	108.569737116821	242.232155089682	0.174402497873611	44.3920052729039	148.820754032155	45.8869396318158	60.4999630491274	22.0808646448886
Female	Non-Hispanic White	191	13704200	2017001140560	W	N	8	55	'02380839'	FMFF	NA	2	37	621	101	101	8	621	4.87517347666408	3.40065879449427	-0.336771796136386	-0.0384551083052716	21.4106186670806	126.055006140479	2.91076754502703	1.5591188073613	0.0788940178107235	0.211235576808099	0.0928916874073237	0.258679697524459	0.812821286909295	2.91150720092701	1.0710836497231	0.0575762338486772	2.67052454932217	2.91150720684185	0.595677461800607	2.91150720684185	0.122761477867585	18.910179609478	19.2666459211605	26.0824559191519	199.244016453834	0.0389142693810101	10.6146418697871	38.3642488034746	10.5360160107009	15.7101840886145	5.3351751808081
Male	Non-Hispanic White	188	13700500	2018HU0276142	W	N	77	11	'7775'	MF	NA	4	37	622	925	925	77	622	5.1501799690243	4.4236039779593	-0.0527321656957852	-0.0152606258112358	79.1125729545822	169.85061971694	3.00601083883983	4.01820317383181	0.164073988738659	0.797452753923218	0.717780096413806	0.963996569219114	3.71753376588022	8.17114875519459	3.00601083883983	0.245044602502175	26.1234215999354	3.00601083883983	2.21034757632362	8.17118463936915	0.61111924376198	25.3181263129163	38.1033454097045	91.049056161832	259.169036224486	0.411667688602491	33.4848749468798	146.706326492067	31.9055137080471	50.769597567595	19.476623299562
[truncated: 378 more rows]
[truncated: 77 more columns]
