# Supplementary material for: The Residential Population Generator (RPGen): Parameterization of Residential, Demographic, and Physiological Data to Model Intraindividual Exposure, Dose, and Risk
Source: Toxics. 2021 Nov 12;9(11):303. doi: 10.3390/toxics9110303 (PMC8625086; doi:10.3390/toxics9110303)
Supplement: Supplementary file 1 [file toxics-09-00303-s001.zip › Children5000.csv]

gender	reth	pool	compid	recno	race	ethnicity	age	pwgtp	ages	genders	commute	cars	state	row	age_months	temp_age_months	age_years	num	mean_logh	mean_logbw	logbw_resid	logh_resid	weight	height	Blood_mass	Brain_mass	Gonads_mass	Heart_mass	Kidneys_mass	Large_intestine_mass	Liver_mass	Lung_mass	Muscle_mass	Pancreas_mass	Skeleton_mass	Skin_mass	Small_intestine_mass	Spleen_mass	Stomach_mass	org_mass_sum	Adipose_flow	Brain_flow	CO	Gonads_flow	Heart_flow	Kidneys_flow	Large_intestine_flow	Liver_flow	Lung_flow
Male	Mexican American	274	14802003	2016001462914	P	M	16	30	5046617181416	MFMMFFM	NA	1	48	1	195	195	16	1	5.13555538238096	4.24652082952003	-0.0692578674909066	-0.029793922219728	65.1871890086583	164.969640526373	2.59496482130449	3.48199068006846	0.156242439104736	0.598454623447199	0.647431694573732	0.794619372862309	4.73393303575748	7.02755803837602	2.59496482130449	0.219634091704931	20.186916224825	2.59497686835741	1.64666733938093	7.05384571880171	0.30957669045667	24.1206445935127	47.6271913185553	128.545071490915	390.096834594306	0.531733193993125	39.9219729729686	185.627285568046	40.9941381550389	71.3252586526826	25.3071890668615
Male	Non-Hispanic White	12	10600104	2018HU1315799	W	N	18	5	18412819404316	MMMFMFMF	NA	2	06	2	225	225	18	2	5.18157996796635	4.35612901882359	-0.277890575549415	-0.00969495854964572	59.0413734624304	176.246751341352	2.31498373848241	3.29214745677062	0.118715736272564	0.810849398256991	0.493037622055786	0.642587976659978	3.50378395757849	5.82212553968307	2.31498373848241	0.191481336222745	20.3168317664891	2.31498373848241	1.55833121591367	6.29277822949481	0.314816758332886	24.5040121798588	54.6240502909421	104.589775800749	409.930512684324	0.507749518120715	37.6978338652183	177.789294543879	37.2483566965199	62.0311287294835	23.7245617692991
Male	Other	46	10602901	2016000253604	A	N	4	136	204338144	MMFFM	NA	1	06	3	51	51	4	3	4.65834359844587	2.8762372277415	-0.00652735029730698	-0.0344873323366803	17.6319020452322	101.886175745042	1.02309088720747	1.55602892843553	0.0398464388484118	0.218354993653339	0.129580863908613	0.215026354160568	0.706768310131003	2.78095259988181	1.02305763559391	0.0324806134148149	2.86427180161194	2.780958295059	0.483184048101633	2.780958295059	0.149534944250386	17.2345191281294	13.0506387909635	32.0562726315626	271.772713975924	0.142913229869411	11.1891165911038	53.0907765155967	11.9163613883815	17.9613662418493	6.95097704172279
Male	Non-Hispanic White	178	12500503	2014001265007	W	N	13	25	10134848	MMMF	NA	2	25	4	156	156	13	4	5.07428951278015	3.9690365115909	0.00530658251222919	0.0256724965603623	53.2151480768034	164.015676117836	2.56066134866213	3.67150993823284	0.138467918386791	1.11421048544281	0.429540846933341	0.605203702974667	3.0522526904956	6.2476958582588	2.56066134866213	0.207042706189549	12.197308225619	2.56067663915882	1.62819280952522	6.9605992129057	0.315962273037712	19.7817984617919	51.8732199506588	118.837220229115	388.403758799085	0.473228129304971	38.5471483714936	182.84687286936	41.7276114837786	65.6266655346037	24.8642623207977
Female	Non-Hispanic White	263	14935005	2014000648308	W	N	14	49	14125352	FFMF	NA	5	49	5	179	179	14	5	5.09534723536232	4.10161817279438	0.217874012247226	0.0589476547538337	75.1504560749072	173.173657242188	3.27603742267692	4.55745440803958	0.323813381497986	0.940174957980626	0.978117944394176	1.15472165698021	4.01028837628703	7.3952593714256	3.27603742267692	0.490407888598613	18.623188256413	3.27603742272175	2.55075002195797	8.90519299541428	0.545738922831749	21.9394376128647	108.849819711001	144.88385961627	388.967422873563	0.276615498069956	63.5627889306684	223.141781276049	61.5892791828638	82.3725680336094	31.8567958383998
Male	Non-Hispanic White	154	12401300	2014001339355	W	N	2	17	533362	FMFM	NA	1	24	6	33	33	2	6	4.54599818490237	2.68529334429388	-0.0421294968088903	0.0128349695266922	14.0576094563492	95.4720137144902	1.68715749243491	1.16173234058643	0.0296383162325607	0.213572533393822	0.0686744611580049	0.157527388624031	0.292144863841287	2.16814661178992	0.807461094919292	0.0170410344594442	2.21243641543417	2.16814675755876	0.332785716021075	2.16814675755876	0.0460062757834775	17.6245192829077	10.7344455894695	26.0054935060685	258.837065456247	0.100464725166022	8.1454618242151	37.6428006943269	7.46248761904418	13.6275696414221	5.16131861613408
Female	Non-Hispanic White	152	12601600	2016000568399	W	N	20	11	20512175	FFMF	NA	2	26	7	241	241	20	7	5.10756742726247	4.17197543100557	-0.412398064154765	0.00973898146130533	42.9302783853962	166.885243029973	1.91114219181955	2.35500502957563	0.17916258289243	0.414696351639298	0.646615933933945	0.434749090218244	2.50957769202719	5.19453959112067	1.91114219181955	0.182561993978833	12.4613433961202	2.38093256084781	1.16141835930481	5.19502309162352	0.225070419189117	21.4631524379226	58.1040910803543	84.7579932514407	378.325234057596	0.14902349180212	38.9758363087256	123.272557419775	36.341547667385	46.8508557719458	18.075832925937
Female	Other Hispanic	52	10603724	2016000278258	W	O	9	42	1534139	MFMF	NA	1	06	8	117	117	9	8	4.92974377447265	3.62442755757491	0.120445918086138	-0.0083268577686817	42.3036544383035	137.196872069408	2.13811674046845	2.83810774889373	0.172975369350368	0.549659006141647	0.490002488739161	0.586707885581644	2.39443223501729	5.7874966844162	2.13812364100524	0.131141807071785	5.61285447989947	5.81200388273947	1.15800936909335	5.81200388273947	0.292745345012512	18.7854745896773	59.5093007303666	82.0414164334234	326.632966606763	0.146633890952447	38.3909462184021	122.895402054482	37.3632534127623	41.8780419356094	17.4594853472698
Female	Non-Hispanic White	185	13604113	2015000899930	W	N	10	74	48107	MFF	18	3	36	9	129	129	10	9	4.98524804488582	3.71460641611347	-0.48076051175934	-0.0321306398028454	25.3770673091341	141.615750169267	1.36906671975429	1.99040698847342	0.114852948590866	0.272161892690705	0.12406771633858	0.358778340616864	1.10983081794312	3.62292323197059	1.33345771139827	0.0951037963998647	3.90760634369695	3.62471292705003	0.745623129413738	3.62471292705003	0.159802104868646	18.0309864894744	37.7875062277873	50.6600170851957	334.491838614691	0.094010671234649	22.6233994314311	75.7872621522344	22.4306342679712	31.0159553765332	11.1507651517752
Female	Non-Hispanic White	176	12602400	2015000459125	W	N	20	21	2053	FF	NA	2	26	10	244	244	20	10	5.10790377654414	4.17315594350303	0.0497907046986254	0.0159872226403243	68.2342506822517	167.987739770625	2.86813887662491	3.90604241443594	0.290204205792905	0.730288017745678	0.843803873708657	1.02865164877097	4.22106565241453	7.79640954765669	2.86813887662491	0.268259987929072	18.6801103285687	2.86813887662491	1.6759514456779	7.79640973795506	0.326348881436658	22.7904277363817	87.4113484808931	130.583257900379	380.198192545721	0.221384891710088	56.905804104879	182.062861257515	55.0457430950023	71.5739228116415	27.2615304215726
Female	Non-Hispanic White	83	11208613	2017000527787	W	N	1	59	133969	FFFM	30	2	12	11	18	18	1	11	4.3955597048477	2.38067515406004	-0.00828771513213086	-0.00644139259797439	10.7229621659975	80.5693506455287	1.69877824784416	0.663889282287349	0.0318319272764524	0.101672494748719	0.0445592901339465	0.0895335623257055	0.222737976762439	1.69877819794951	1.60376832435187	0.016828146209853	0.592517609744459	1.69877824786909	0.190550932291665	1.69877824786909	0.0550000849564362	17.1582331240982	12.2190429320863	16.6121853116983	219.118605509551	0.0279784139723259	7.24012416629392	24.375505722809	6.95713138264643	8.95427735997613	3.42343016870005
Male	Mexican American	263	15151245	2015001187624	O	M	3	21	31334429	MMFMF	NA	6	51	12	42	42	3	12	4.59958244601465	2.80762763603416	0.189605707164122	0.0194122614196845	20.030043936265	101.392052202006	1.11733446513849	1.56013470392806	0.0376221440649805	0.216240808957814	0.11279037025629	0.184475091940803	0.591933651209059	3.03722908620164	1.14075169988077	0.0359745569232122	3.1018950174034	3.03722909075227	0.479016019678206	3.03722909075227	0.0576306610019582	16.8251891849905	13.7867847157268	34.8132538205664	270.783589083604	0.15397717242144	11.7766879446159	58.9041912505674	11.9718372618867	20.6602216021814	7.56389372003835
Female	Non-Hispanic Black	44	10605301	2015000646710	B	N	20	13	4820	FF	10	2	06	13	247	247	20	13	5.10306163183115	4.28845954586801	-0.248512654138249	-0.00258187877292579	56.8233249368362	164.100616190451	2.3322296227392	3.05101895403307	0.223031975466713	0.369765949944495	0.948308617331383	0.699789246483754	5.47483808485543	6.33964681733911	2.3322296227392	0.231229112532231	15.3531066361268	2.3322296227392	1.77761073996025	6.33965740328488	0.457725949550708	23.364378354005	74.989325022491	106.079066850652	373.580773221983	0.175116883239383	42.5027984886879	141.318897942459	40.7754641964698	54.6172474414738	21.7819036448531
Female	Non-Hispanic White	228	14800300	2017001009392	W	N	20	20	4717532010	FFMFM	20	4	48	14	244	244	20	14	5.10790377654414	4.17315594350303	-0.0609798597739363	0.0257840025693425	61.0794871365217	169.641566549017	2.4730117337278	3.25860141696774	0.233011451439388	0.555821434891662	0.8456466183743	0.771001176083123	2.77469787926572	6.71427876446473	2.4730117337278	0.269486838060359	15.9768596585287	6.64742349149667	1.43564022376877	6.72234285735825	0.356276570838701	23.6984218891875	81.0141758505652	108.077935529324	383.002019124869	0.175246484315383	49.2946544980936	142.952978525846	51.5126387468884	57.869643954023	23.679212183431
Female	Mexican American	262	14803306	2016000807638	N	M	9	12	72791418469	FMFMMF	NA	2	48	15	108	108	9	15	4.89549854661115	3.52251436930571	-0.318279166290273	-0.0252774628738357	24.6366507732316	130.349731916966	2.82224180695632	1.73149166132145	0.0964629579171907	0.222345384465162	0.222093128359704	0.240181262926111	0.979161260041198	3.42952832848395	1.2616708772661	0.1155380422557	3.29942039819224	3.42957701898641	0.490868627314639	3.4295770189864	0.130695212938176	18.5165328088666	37.5998838626994	50.8446283603841	314.329009876478	0.0792323578854905	18.2705551857937	73.5248328951147	18.9544939925365	25.1275844240431	9.91449394049985
Female	Other Hispanic	275	14957001	2014000128434	W	O	12	28	849201210101355	FFMFMMFM	NA	2	49	16	147	147	12	16	5.03461407412917	3.9215453553515	-0.193507526495677	-0.0522233890563387	41.5974068029148	145.822581138122	2.12721954568931	2.72167728477904	0.181135235950677	0.462362944674944	0.226077983872211	0.620543233926323	2.28764029683734	5.74985683711217	2.12720198929188	0.151501073572547	8.83796241686661	2.66507047630239	1.12256750810818	5.78233451290986	0.248207408203886	18.554986791246	64.9592113588263	91.5012112815425	341.91680269775	0.134071905295446	34.6910237239782	126.896319275222	37.3577651044357	45.0568663484136	18.1831525717743
Female	Non-Hispanic Black	119	11800104	2018HU1358451	B	N	17	34	17461447	FFFM	NA	1	18	17	208	208	17	17	5.09026932009139	4.20558671054371	-0.322786543504991	-0.0312561368158259	48.5600009851596	157.435080072406	2.19340519523259	2.83796772369788	0.198690978745055	0.702100350893661	0.406024104705022	0.865334507870861	2.40193220272622	5.61037633653361	2.19340404120997	0.224860426706476	14.2413617342179	2.19377781248471	1.0341792218598	5.9622903476897	0.294841946481777	21.1391043660027	67.1736670226266	89.4847225352385	362.141244591241	0.151832714190219	42.039139183282	131.794430177106	38.5619755643388	56.0751222794695	19.8580517343809
Female	Non-Hispanic White	154	12400302	2016000116208	W	N	1	16	11302031	MFMFMF	NA	2	24	18	16	16	1	18	4.36783964231825	2.32742836427752	-0.0864673873642554	-0.0604768060291021	9.40236240059928	74.2444358100171	1.56513467262835	0.582068867698803	0.0303560927599286	0.053274302141003	0.0349459043373114	0.0970356458352446	0.206097553107777	1.56513467262835	1.10538461693555	0.0138695814647901	0.483117041040453	1.56513467262835	0.232120691351438	1.56513467262835	0.0491094950328232	16.3297582662426	9.71812177428353	12.7133005883263	206.086617540922	0.0240336790592652	6.06129363592887	20.3924884950171	6.28296338504119	8.20213034044568	2.96651829200548
Male	Non-Hispanic White	82	11201106	2014000713204	W	N	17	12	17565120	MMFF	NA	2	12	19	205	205	17	19	5.17673361271326	4.33841299527734	0.303302093973263	0.0665536776033221	103.722087757343	189.291336335038	3.88727556909748	5.63990434474046	0.243683483737066	1.67272862755681	1.89370418901871	1.69721824864353	4.33805104419275	7.49090290992861	3.88727556909748	0.513571886796589	32.3133538196977	3.88727556909748	2.35185651602849	10.5667105416685	0.501071996343633	25.6824633123257	77.2026558445584	206.078292807643	432.481423823297	0.843813524252342	67.104865022163	312.690317523279	66.136247638943	103.966558424767	42.0293618229199
Female	Non-Hispanic White	274	14804602	2015000928868	W	N	5	11	352431	FFFM	20	1	48	20	68	68	5	20	4.72704345200168	3.01238917870827	0.0187592659913606	0.0298737245965077	20.7210158707315	116.386573021894	2.88955823177963	1.38364176269855	0.0769214167781126	0.215367501386147	0.191179984576962	0.198223427556614	0.605123943629674	2.88956191641476	1.06325301192374	0.0556313914992316	2.43575222244302	2.88958677341911	0.498386443009267	2.88958677341911	0.1022851570579	18.2680754739824	26.1496675701882	35.2926749864949	288.721428824607	0.0653537611969826	14.2180202636582	52.6985641757691	16.1580585455302	20.5831377243047	7.67291320936353
Male	Non-Hispanic White	202	13401401	2016000029276	W	N	5	18	53837	MMF	NA	1	34	21	62	62	5	21	4.71531734487919	2.98449086669894	-0.203081002258053	0.0339797670014767	16.1417626100475	115.503070252429	0.966681573559183	1.37548884368994	0.0385254602865028	0.262529605994981	0.100507660312471	0.217495564594288	0.653995582008715	2.56724816914181	0.944437966627529	0.0233857262526779	2.61683357193962	2.56724817208534	0.43555115221154	2.56724817208534	0.0880755058127043	17.0913978863797	14.0685533560323	32.9736279851179	298.582638652563	0.137072303446171	10.6604131112801	55.4202452185046	11.1600585205399	18.6710218541728	7.04981843008298
Female	Other Hispanic	274	14804905	2018HU0915815	N	O	12	10	1215634501437	FMMFMMF	NA	0	48	22	152	152	12	22	5.04396279711569	3.95834389265471	0.0809763664699329	0.0194170670415409	56.7877287427323	158.124051992147	2.72566896162952	3.82013998467994	0.244545616696387	0.778461254157295	0.557479225823277	0.681578829381072	4.02802316668098	7.33924966878039	2.72564817155697	0.262355060036073	11.5260967112696	2.72564817155696	1.63704765830589	7.4090798955156	0.326239851423785	19.8345777475358	87.3668386815917	119.563252677298	363.329205258274	0.201297199302382	51.2634613641334	168.885505629156	46.9741283295397	61.7374635863739	24.7576895996364
Male	Mexican American	264	15310501	2016000166833	O	M	12	84	121046416	MMMFM	NA	3	53	23	153	153	12	23	5.04378047376479	4.02886172396054	0.199644957996847	0.0577563778377563	68.6146920727498	164.274178432983	3.33175197484812	4.97274761511601	0.190217065939049	1.03674245457577	0.777102393272596	0.972260823315431	2.40492755468989	8.98325447249823	3.33175197484814	0.325019800489006	13.5000965221996	3.33175197484812	2.21505479257534	9.05664084978382	0.109084445504448	19.5941776550992	68.3245393990334	157.924838586294	388.862785821973	0.643641330992747	50.7483611518127	241.949532386975	51.7647497513076	90.3124970157578	32.3898588651825
Male	Non-Hispanic White	91	10900903	2017001377822	W	N	19	34	595519	MFM	NA	1	09	24	232	232	19	24	5.18619220588416	4.33872940953233	0.150997274616264	-0.0702945685976303	89.0970909032519	166.650305391868	3.29153039229683	4.94741821995266	0.15745028185548	1.02160688491313	0.991306718444713	1.00540173694288	2.81879004905179	8.94730301385282	3.29153039229683	0.415122362840251	30.0373409319825	3.29153039229683	2.57479913582866	8.94730723976031	0.283630977694851	26.0685912886497	64.982159095616	150.031942764616	393.073703492627	0.652704380568594	46.2974880017267	263.218862809093	50.3565124637257	82.19590341517	32.3453510364664
Female	Other Hispanic	59	10604101	2017000168990	O	O	9	18	484591615	MFFFF	55	1	06	25	119	119	9	25	4.93630722700243	3.64415782021347	0.0327180314891964	-0.00669210851159995	39.5227261371068	138.326262872439	2.02999808192804	2.74209169989746	0.170106575925377	0.369979996536172	0.339739408026574	0.503408140060073	2.09361130659543	5.29203844232066	2.03000042876313	0.171613635806997	5.37825409226152	5.518106895511	1.31888854354157	5.51810689551098	0.245924177223452	18.4693416245802	54.7390470411001	75.9053303315498	328.647505837511	0.142602612776417	33.3217717137283	118.302969507162	33.5607880987406	45.458597488788	16.6788451547582
Female	Non-Hispanic White	192	13903200	2014000121968	W	N	3	40	286253	MFFF	NA	3	39	26	45	45	3	26	4.61615747790664	2.79057838186164	0.0439892671769535	0.069668574439936	17.0230387819477	108.399779226393	1.53412411086361	1.21019647181746	0.06655437873894	0.140618050674129	0.0792485680116504	0.250370324171692	0.845904410045652	2.66874490533444	1.23642862960576	0.029610095360472	2.24048544061492	2.66874532808129	0.513134324401723	2.66874532808129	0.0846258707714941	17.3390156412529	24.3099717647265	32.6162848892244	273.730478167599	0.0561297515004227	12.8529648688246	46.2354937756004	13.6801775714999	17.4709402433706	6.71855404317436
Female	Non-Hispanic White	155	12600500	2016000372750	W	N	5	64	34550	FFM	NA	3	26	27	62	62	5	27	4.69838562974303	2.95429238279469	0.362341087944679	-0.00257320017636559	27.5673877478129	109.487723582184	1.53784531688304	2.01594839884666	0.107981818574678	0.249936193152299	0.236814771823504	0.229830530963314	1.1663916887403	4.17894959555799	1.5374811306629	0.0741864177177542	3.4954925342176	4.17930683003327	0.688929298336858	4.17930683003327	0.159441508171237	16.9302291525111	38.1783120309506	49.4689328757378	275.788356938909	0.0847888971829193	22.4798687771159	75.7150471722404	21.8275953794559	27.5852945719122	10.6004843917511
Male	Non-Hispanic White	48	10800804	2014001499441	W	N	2	37	47242432	FFMMM	NA	3	08	28	31	31	2	28	4.53312534935024	2.66297016208017	-0.177890661795601	-0.0400009641220625	12.0020743852329	89.4003310531675	1.80964779634865	0.923860125405395	0.0234745832200777	0.124552671975098	0.0412005581558188	0.139294957511294	0.266784014054779	1.80964776967299	0.666575856311733	0.0182060521858465	1.85972317262289	1.8096477963487	0.263680681906348	1.8096477963487	0.0605926747641155	18.0283814182071	8.32400986739472	19.6346437974819	246.390381785403	0.086152341104309	7.02950155306992	30.2335848210682	6.74519838062309	10.1435522769687	4.10075039654951
Male	Non-Hispanic White	190	13603201	2018HU0761276	W	N	19	26	4619165414	FMFMM	NA	2	36	29	232	232	19	29	5.18619220588416	4.33872940953233	0.0694416206180581	-0.0208201502813189	82.1191326531122	175.102594355282	2.96992724452175	4.26839808841778	0.154570589564398	1.14904188141827	0.997453115688846	0.762791668309276	6.64033037833521	8.07303030109869	2.96992724452175	0.323685131999754	26.517254126978	2.96992724452175	1.54061864062522	8.07309926016997	0.276421572360008	26.650216955512	61.4266873478773	153.032010741873	407.933001421087	0.547414768977677	44.8605592638728	248.320692648715	47.057030028496	72.3597962178178	30.2882833715004
Male	Non-Hispanic White	192	14001203	2018HU1056338	W	N	14	11	892114	FMM	20	2	40	30	174	174	14	30	5.13615347707899	4.12993588366094	-0.263839735882682	0.00109418111401461	47.7555909379494	170.246546201099	2.1555795489875	3.01792296589632	0.117439655557289	0.827609641653187	0.514129867566313	0.300571776708849	2.69573008791392	5.57272791380171	2.1555795489875	0.260325313743537	12.6354508532544	2.68058293903226	1.49034733862187	5.85947271781062	0.478315371156136	21.1544089826637	41.8812165012356	98.6246661333999	399.418464560014	0.405408232574428	38.1205179563445	161.664689766628	37.5561242914032	56.1941515314815	21.5244568423389
Male	Other	275	15151135	2015000707885	A	N	12	54	1249530	MMFF	NA	2	51	31	146	146	12	31	5.02653448535389	3.84169056973996	-0.120590664091378	0.00459791850224423	41.3098060186059	153.10629272189	2.07870504886119	3.28583056152162	0.0988986064638779	0.443758882140571	0.6465082004069	0.687517634011857	2.48735979434413	5.53897713663389	2.07870504886119	0.199780868903165	8.40337425795223	2.07896220390697	1.17944903586449	5.65050616104544	0.336835118510056	18.8728559594459	39.0657395011414	89.5104367056862	368.862228530472	0.394487854541956	29.3462736036644	149.739407455369	29.5250407055087	50.8958900979904	19.168894419512
Male	Mexican American	256	14802510	2015001119696	W	M	14	62	14131646	MMFF	NA	2	48	32	176	176	14	32	5.12080916010655	4.1679908936333	0.571099797439587	0.00600490770345337	114.330192934211	168.479497833361	4.53744834490137	7.17278094515694	0.224062337385527	2.02487356960633	2.10417381800844	1.53349442106256	6.16843460174828	10.1975349644933	4.53744834490137	0.425534358419597	26.1567250759833	4.53744834490137	2.85750117125172	12.3340632310643	0.599155859450381	24.1970235788317	88.3780454290366	221.373909430984	396.30513516012	0.925911543564628	75.1828058720862	372.561589812041	67.7500683638247	115.233419791717	44.955351990205
Male	Mexican American	82	11201101	2014000254318	W	M	21	25	1143501821	MFMMM	NA	1	12	33	254	254	21	33	5.13910348807149	4.35397029010077	0.19724707329248	0.0920125402868934	94.7476804944521	187.001385956346	3.3121499245321	4.66234446940525	0.20659034698388	0.906248067620266	0.901469199857461	0.846428548937767	7.18290974747284	8.98989406499696	3.3121499245321	0.467295839618761	30.4960780869883	3.3121499245321	2.60819290468637	9.00335695298758	0.478801995201584	27.6060965394967	70.1228922753101	181.492130132585	428.551504615296	0.736840429963281	58.2803129137419	252.857522171142	55.6650515738015	94.1747640503006	35.4856708417418
Female	Other Hispanic	58	10603750	2017001287978	O	O	18	32	101804216	MFMFM	35	0	06	34	219	219	18	34	5.0747207798822	4.144221409111	-0.135397222340621	0.000914190110691939	55.0820662498342	160.073801777163	2.26699949108409	2.98862901535546	0.221578902116767	0.48510907712203	0.417709946657951	0.751245095932949	2.18890207871948	6.1619033964444	2.26699949098901	0.308848909052324	14.8335232472952	6.16234121615209	1.45127602603112	6.16234352021772	0.278719586472528	23.297343898255	74.828738178121	99.6561178175219	366.684077907341	0.161212945913561	37.4616482122583	150.843704467968	38.6179746693638	56.6294492013506	20.7818154492429
Male	Non-Hispanic White	192	14201900	2017000395021	W	N	8	16	8403715	MMFM	NA	2	42	35	97	97	8	35	4.86688299742072	3.35410603543666	-0.0854293358959564	0.0547138106253797	26.2765445628802	137.221554818901	1.38472423518306	1.89187797663029	0.0640641678444051	0.385953702147906	0.267689637109095	0.519508832353484	1.02455736435003	3.76398291603211	1.38472423495368	0.0879504735154929	4.00920157941629	3.76407072514821	0.713223220444706	3.76407072514821	0.154635891875332	17.9749629232714	23.5109713441221	56.5173646805562	339.770881682746	0.251248440770826	18.3617674339401	89.9021313913559	18.2611887006116	32.3302682166985	11.7622243544631
Female	Other Hispanic	190	13603709	2017000351572	W	O	6	46	23631	MFF	NA	2	36	36	77	77	6	36	4.77470916481179	3.18602206671022	-0.0560686503113081	-0.0664902276764233	22.8729140149207	110.854545062122	3.22219060890913	1.57136018967845	0.0834790827030211	0.229753937151685	0.18635132093533	0.240641417087919	0.678529421624598	3.22240273389749	1.18551260349897	0.0497677912032951	2.73919411487811	3.22241282855231	0.446195317192816	3.22241282855231	0.112459202008747	18.2942272713504	27.7308510988668	41.8022332511298	278.366510797685	0.0695181191099917	16.6674073492219	54.322191609145	17.8819582140228	22.1520927672152	8.24980513464924
Female	Non-Hispanic White	58	10603726	2014001229976	W	N	14	25	144922	FFF	NA	1	06	37	170	170	14	37	5.08398723169756	4.06273936332503	0.107559143352411	-0.0562323846959473	64.7347729855528	152.590039840944	2.72800850402773	3.27028662202144	0.232339773584623	0.501778469651601	0.954312624274409	0.812383156634488	2.73866932223837	7.36691726001131	2.72800850402795	0.272405921031518	15.3185878362232	7.10930489602804	1.91490577217818	7.41549594437316	0.343300348307089	22.7296815204117	80.4382664011495	123.724640279584	353.750039970886	0.197360548244605	48.5526228908953	178.444971013074	49.4157738190118	64.7211357250992	24.1258279335181
Female	Other	264	15311300	2015001377134	A	N	8	28	8113437153616	FFFMFFFF	NA	2	53	38	102	102	8	38	4.87456513886737	3.38199040500274	-0.0692761203543952	-0.00767103396209416	27.4595574666779	129.91678172553	1.44892773298803	2.11919299447746	0.120646533918694	0.335136226353561	0.309263403344075	0.365107714970131	1.82605057555794	3.93858561779844	1.44892773321914	0.086437734274272	3.51642245028687	3.93859392733058	0.587793036280793	3.93859392733058	0.160963482297884	17.9516393210313	39.1521575417131	49.7435364580334	313.54566312807	0.0952597916047938	22.4857567979392	83.6064491572291	20.9421844675585	29.6421906293995	11.3576251716063
Female	Mexican American	189	14101305	2016000496284	W	M	20	60	2070224471	FFMFM	5	3	41	39	251	251	20	39	5.06817841671823	4.20295388680382	-0.23034756084378	-0.0418889872680427	53.1228059145682	152.366595478021	2.32637864613671	3.29110074446534	0.211752402267795	0.612060520001858	0.697777383015529	0.602122488780261	2.81965371380166	6.32373599980618	2.32637333400315	0.186265915000244	15.2868866364654	2.32637333400315	1.2919665470046	6.32373835114341	0.361823046637159	21.8350304476522	69.6061874050207	104.370505454174	353.361459908975	0.168506961009433	41.0261171709802	134.984472580724	38.2398809930601	53.1360723277797	20.5512669399165
Female	Mexican American	256	14802302	2014000600755	W	M	2	29	23017	FMF	NA	1	48	40	35	35	2	40	4.54017758712411	2.65274300040649	0.238723706380744	0.093525387419601	18.0197198741962	102.894374786074	1.12695228656616	1.26513780899983	0.068292911159074	0.266307048879781	0.0884793488914615	0.191306336668935	0.604272383401208	2.74204293581632	1.01042029352115	0.029011328098861	2.33191745066825	2.74207607515498	0.443280034879617	2.74207607515498	0.106902668970036	16.4686583349199	23.751251251574	30.6358048376598	263.236181472995	0.052421672437986	13.8521004212692	46.1951188671949	13.7559103770605	17.5241392671447	6.63850991989892
Female	Non-Hispanic White	192	14001501	2015000470841	W	N	3	21	2520328	FMMFM	NA	2	40	41	38	38	3	41	4.57812993902748	2.71874124040564	-0.0424140250085935	-0.0237085552534939	14.5316236411592	95.0517408414402	2.22050558020444	1.07134311268259	0.0533778629125502	0.14933720224044	0.038587979106495	0.164042761573773	0.400427324790096	2.25481382405973	0.834046276723824	0.0125966562611258	1.89065230913391	2.25481382428825	0.298617203981799	2.25481382428825	0.0671109931273497	17.5185410237751	16.9396982236084	25.6836272680837	248.040109397308	0.0421173838217426	10.9815012015676	33.7946172143248	10.3917920801751	12.5920406877402	5.14372959594914
Female	Non-Hispanic White	190	13603104	2015000047094	W	N	12	26	125051	FFM	10	2	36	42	146	146	12	42	5.04851698650528	3.9056653247469	0.110477867335827	-0.0191161348248574	55.486691104825	152.841410582416	2.7625064366586	3.69503361724774	0.264878089546494	1.00677996691067	0.62919179161601	0.68400806792176	1.99416266216974	7.45861396879413	2.76250643678607	0.243282172505332	11.564165074918	2.7625064366586	1.80828363553654	7.50927104777023	0.37472522069679	19.0856332381364	82.8338320642153	119.122802490933	354.187015304871	0.211111993490181	47.5002537165091	165.857869701564	48.3360530928394	59.1677851699215	24.4610977390151
Male	Non-Hispanic White	154	12200500	2014000827784	W	N	5	36	5201136031	MMMMFFF	10	0	22	43	67	67	5	43	4.74351663579767	3.03747988948077	-0.0809297794685018	-0.0178612660306422	19.2315105837424	112.804402749227	2.58784576271092	1.47588334217454	0.0382974774324041	0.289391023331325	0.0981474078965849	0.2239193320255	0.571001117016006	2.84647062880376	1.04913120878322	0.0369148899601068	2.89186972769523	2.84647065837858	0.445060030656274	2.84647065837858	0.0381310692464055	18.3654328562033	14.5286915233006	34.2774861070308	293.335039228747	0.146653995197948	11.9026103485151	65.0935265904986	12.1395566033739	19.3985698767823	7.67920358273052
Male	Non-Hispanic White	226	14203401	2016000223125	W	N	9	19	63315894	MFFMM	NA	1	42	44	117	117	9	44	4.937581873685	3.55916680436012	0.197035997947339	-0.0217164730270687	42.7856515536571	136.437331683678	2.1837978127894	3.16145390736328	0.11089707566638	0.621426657508214	0.367650450611758	0.497197332471101	1.41359820393469	5.69512407331542	2.18379781288312	0.130926647276876	6.54433875564426	5.93617791153398	1.15905368820841	5.93617791153394	0.268780469728299	18.5923135603133	33.6335390815933	87.9260614958309	338.313492255361	0.396693681938447	30.033676899482	142.258634068409	31.5776206067025	44.8894091947071	18.4702066106098
Female	Non-Hispanic White	192	14200300	2018HU1301627	W	N	11	19	44421811	MFMF	NA	4	42	45	140	140	11	45	5.02717414270724	3.83786270545684	0.345731074498502	0.0195246452463453	65.6011863214744	155.508250478851	3.19970621780334	4.51400139236882	0.285618173580755	0.709975312621701	1.13081240063969	1.0300631792706	4.2946271553597	8.57318126555943	3.19970621806033	0.329503207823011	11.0095142496372	3.19970621780334	1.87137746672744	8.69770326372542	0.490471765589679	19.5022529744968	92.5612805997864	144.296912128662	358.811979627335	0.237791519565345	57.8290706362851	172.829290408609	56.033192013303	78.362452743619	28.7023230558977
Male	Non-Hispanic White	119	11800900	2018HU1237325	W	N	13	17	897132515361234	FMFMFMMFMM	60	2	18	46	164	164	13	46	5.10341548646241	4.05271806113451	0.115233261317551	0.0128501737516384	64.5830067289261	166.711647812147	2.89875095860273	4.10497293942604	0.15156586443178	1.22752679005536	0.854856666293856	0.76151461336143	4.17016221822657	7.86268448028002	2.89875095860273	0.434888420332042	14.0371428827939	2.89875095860273	2.19310107164867	7.87962205599792	0.511092416416364	21.2795982308383	55.8474114626394	133.803098399992	393.182213568579	0.555294272378968	42.9596110871148	227.60175805401	45.0766353915665	73.5283035197063	28.4934329621865
Male	Other	203	13604114	2017001186442	A	N	6	30	364540	MMMF	20	1	36	47	74	74	6	47	4.76443401424608	3.09332736077051	-0.338518540976927	-0.0595285735929152	15.7180356382413	110.487836795813	2.25108987461463	1.38398832366504	0.0337323728721389	0.19264384505177	0.121292972704028	0.168381858835943	0.567826718969479	2.25110088893886	0.828133742866367	0.0222696761674236	2.36091246402775	2.2511008895662	0.352355496729364	2.2511008895662	0.0703237506680217	18.9800691974924	11.9651845574209	26.6778198641832	288.805366094125	0.119724303862828	9.49516416316031	46.2998419688528	9.72299964849722	16.4327367583769	5.97923667920892
Male	Non-Hispanic White	192	14101320	2014001271059	W	N	1	33	4213621	FMMM	NA	3	41	48	17	17	1	48	4.40161942134936	2.42321271713876	-0.258133461521569	-0.026388654626	8.71529262537562	79.4581737391177	1.37965709077316	0.575161565382964	0.0172001434359435	0.12393601733851	0.0274143868491194	0.0655490694326556	0.202166745980808	1.37966960079023	1.30572307239891	0.00652044778825535	0.396455273417325	1.37966960079023	0.211633246936747	1.37966960079023	0.0569639122663906	17.1712282126768	5.55553995177314	15.8567490302764	225.53987713777	0.0567815944453086	4.80823423626468	22.2601693833109	4.97121240422858	7.2196944198837	2.86183085391611
Male	Non-Hispanic White	263	15151044	2018HU0372454	W	N	5	15	2835307	FMMMM	NA	2	51	49	71	71	5	49	4.76223002526207	3.07661588790934	0.0870102411167664	-0.0462738594573737	23.6562211012679	111.715578738068	1.28784029183104	2.07455135164827	0.0567667451029336	0.211339727650393	0.105156457302134	0.269559025278118	0.779978056716351	3.50071222268726	1.28784028959	0.0520647348115397	3.53217771462602	3.50071285693584	0.588284697165458	3.50071285693584	0.188747739062859	17.3688619444635	19.1190620398311	47.3324691075767	291.208944358613	0.188905272246148	15.4017245747215	78.4168004815946	14.9000633040546	24.9440200065139	9.37576528027647
Male	Other	263	14806500	2017000911851	O	N	0	133	500242312645	MMFFFFFF	NA	2	48	50	6	6	0	50	4.20578362976247	2.05436585639679	-0.34065561406518	-0.0135524710086408	5.54951336721726	66.1702627437167	1.0053314682457	0.148454485778144	0.0105075121536844	0.067442223858566	0.0177400555509756	0.0600192404975525	0.113083910971704	1.0053314682457	0.73262320555172	0.00447340069303496	0.146282991441077	1.0053314682457	0.113212104196865	1.0053314682457	0.0178838553117544	15.0051419053068	3.33335471208975	9.25427844234546	196.614955609734	0.0355927602747332	2.97301625963958	13.1943676542432	2.90621410955924	5.00124335745339	1.81790570731816
Male	Other	262	14803802	2014001226946	A	N	8	11	853451234	MFFMFM	NA	3	48	51	103	103	8	51	4.86451647005591	3.35724339755921	-0.229031187718992	-0.0455760820759848	22.8331221999595	123.833805447605	1.36150409497896	1.81284121903044	0.0523169097410993	0.225634893559306	0.172580473840753	0.236696479695364	0.904265718891778	3.32794932409351	1.22428443103371	0.0386548489234893	3.52056618192075	3.32794975133624	0.663217173135271	3.32794975133624	0.0928440979031362	17.6454965472516	18.6966473092128	45.3862204616014	314.592829521979	0.19590436618303	15.7776268098986	70.254739471546	15.3079987183285	26.3198989104522	9.62877651076135
Male	Non-Hispanic Black	130	11700501	2015000663571	B	N	9	107	43193811713149	FMMMFFFM	NA	0	17	52	113	113	9	52	4.92786651674229	3.57045953865532	-0.0819697961140899	0.0222561008830899	32.7364698557164	141.192275521648	1.65135168134439	2.37797209935096	0.0813201314858745	0.321924505058406	0.309084611132738	0.447780302602872	2.03066970221025	4.4888273066765	1.65135168198998	0.0644358704651679	4.94634230003614	4.48883926772297	0.935351364143695	4.48883926779375	0.260234576530076	18.8240445527025	31.0954069246114	63.2026130712812	347.118378517214	0.304901862936506	24.6351596801398	112.583738784137	22.5374653964017	34.2666054448359	14.3303629497485
Female	Other Hispanic	58	10600300	2016000131388	O	O	12	38	127142	FMF	30	1	06	53	152	152	12	53	5.04396279711569	3.95834389265471	-0.186036657394427	-0.0758131103432604	43.4802684031847	143.760638913575	2.22081438083942	2.85345761836146	0.203067684694252	0.456023323385764	0.624381124310055	0.556766534255098	2.05907298647312	6.03217574737741	2.22081438090328	0.189310970703487	9.2049819495251	2.29611863336394	1.5375196297486	6.03679937581631	0.229754231018161	18.5785243369823	66.6634334487158	80.8232633150102	338.284308653603	0.142289916049758	38.1963374535062	123.71977218773	38.6113492102467	51.2478462174453	18.781666436756
Female	Non-Hispanic White	202	13602202	2016001071869	W	N	5	81	579296967	FFMMMF	NA	1	36	54	66	66	5	54	4.71735884001292	2.99283887362652	0.259061936057776	0.0430274666607377	25.8394090658512	116.791034341573	1.42720935628348	2.12405174214101	0.10195174728725	0.351959038742228	0.240978504854867	0.318337673850489	0.849231456527799	3.87942800315719	1.42740825789141	0.0870185287080909	3.30425156834751	3.87950227658479	0.666124359217236	3.87950227658479	0.142011511812801	17.1051045809138	37.5155683838441	50.2925839543986	289.473616082688	0.0822288907199736	20.2807756458194	75.254911037249	18.8862396155356	26.6628516739044	10.3283399539981
Female	Non-Hispanic White	264	15310600	2015001397002	W	N	1	20	9291302	MFFMM	NA	2	53	55	21	21	1	55	4.43201250907458	2.45247314296374	0.105502760892829	0.0687957734871775	12.9096604585296	90.089919990963	2.07353272893277	0.795107789521387	0.0496808922905507	0.118245484916676	0.0683965403147764	0.168322710007659	0.401154244575237	2.07353169709576	1.34241878411827	0.0234080047502476	0.846068498878316	2.07353273295148	0.277551796028483	2.07353273295148	0.062337732505889	16.9238203373076	14.7296397593338	21.072588169303	238.264318322518	0.0326387762284318	9.48600977117303	31.097682128543	9.25644473397901	11.7688590383589	4.54376049204747
Male	Mexican American	262	14801903	2018HU1025841	W	M	0	8	02829	MFM	NA	1	48	56	4	4	0	56	4.14519601098537	1.9568916161139	-0.184522502973437	-0.0207374533507674	5.88477856590611	61.8343204643274	1.02266699512149	0.153101355595906	0.00917989515178403	0.0577288649870692	0.0173341638005915	0.0583592413825867	0.0814840685825924	1.02266699512097	1.02209143802834	0.00577052781422622	0.154389195207385	1.02266699512149	0.118930417954172	1.02266699512149	0.0116852696661745	15.6419310650653	3.31005214151052	8.59012530971576	186.870866575438	0.0352840364219582	2.89645494954133	13.3619654205032	2.74260993707197	4.42691607150708	1.75760535198799
Male	Non-Hispanic White	227	14400300	2016001090115	W	N	13	12	6133536	FMFM	25	2	44	57	165	165	13	57	5.10676793255371	4.06129109470306	0.0045613029472571	-0.0782844883616842	58.3145945667976	152.701257026602	2.81568408659545	3.8682241712568	0.136223138949211	0.947142284721506	0.701893144229209	0.826332868273372	1.76429135506407	7.59063490005728	2.81568408478276	0.158674439545711	13.9227559795325	2.81568577091249	1.52894250523233	7.6538228823463	0.235731506398145	19.7106311684454	52.2868201763499	131.31834943728	368.130130134701	0.478963557976095	40.9114956371796	199.190522847576	44.1398575740859	66.2668859918163	25.9134537137321
Male	Non-Hispanic White	81	11304500	2015001061479	W	N	21	100	572152	FMM	5	2	13	58	252	252	21	58	5.1735155490914	4.33319832763744	-0.0786123634598203	-0.0266381446122019	70.4276515804057	171.893896298704	2.53036250403198	3.50416213410778	0.143509108849288	0.716543438141932	0.929680315183345	0.934500873695965	6.22232833037803	6.8747113814216	2.53036250403155	0.336150868873194	23.1574542708313	2.53036250403155	1.86170502188255	6.87823824545082	0.371465601578621	26.8330284566719	52.0299555068561	122.595001288267	402.313630725441	0.557879835069251	38.2143234642809	199.483059972058	40.2347104660372	62.6525503584105	25.4499831512112
Female	Non-Hispanic White	227	14600100	2017001091234	W	N	7	12	114171341	FFFMM	NA	2	46	59	86	86	7	59	4.80731011570519	3.19925780414657	-0.0824086316985756	-0.0109456767510853	22.5751371016635	121.069461025945	1.31084166762934	1.7508619065756	0.103217154037037	0.197573197396083	0.222482395580539	0.281950526118838	0.53733909924071	3.48188558021094	1.28093561177334	0.0484660541900048	3.02454481781663	3.48189595046792	0.594443472700868	3.48189595046792	0.136774930889967	16.624173896098	32.4751498589924	43.8544201288102	297.390995425711	0.0801623337109338	19.7577443599851	65.2367065378905	20.0760242294874	25.4980611336596	9.52333650467554
Male	Mexican American	262	14804616	2015000916155	O	M	2	22	5025242	FMFM	10	2	48	60	30	30	2	60	4.52403468594147	2.6616166116156	0.160324069786188	0.0347150419419953	16.8094408075261	95.4640491464183	2.49788469944554	1.14954107910477	0.0318946198056253	0.180387478809946	0.0995622898414065	0.166402080146034	0.478075658429988	2.50126015543558	0.944494472165197	0.0377246089112437	2.55802777706652	2.50126015719468	0.370325072262752	2.50126015719468	0.0643721449101424	18.2679108217609	12.1229219207882	29.0817469291901	258.820870551227	0.12023941250314	10.4120742702151	41.2117288423071	9.17156138954786	14.8714875675719	5.95392946918252
Female	Non-Hispanic Black	127	11702100	2017000510880	B	N	21	43	2125	FM	25	2	17	61	261	261	21	61	5.10334256752343	4.32887289161492	-0.41459522895777	0.0494326027995615	50.112860043997	172.910681682816	2.16959038758969	2.99731580665263	0.206410502689304	0.555494939323369	0.490685780806796	0.572414040041614	3.31507269743376	5.89591792156434	2.16959038758975	0.465638338637623	14.2621172551222	2.16959038758974	1.37473125149011	5.89755812574896	0.291096000139338	22.0978438744136	66.4363839216287	101.024768645191	388.524334316873	0.165966369434748	43.5906502368115	144.662385491617	39.405984295267	51.6633783886925	21.0734665269641
Male	Non-Hispanic White	46	10603725	2017000319836	W	N	7	52	1075548	MMMF	NA	2	06	62	88	88	7	62	4.82729546548537	3.23625654582951	-0.118944392207854	-0.0270989898864389	22.5855913850158	121.534293696259	1.21572835348879	1.74999989390472	0.0490784004851603	0.319822560310181	0.17941674429069	0.207511956313529	1.04504881122474	3.30428519533274	1.21557949149076	0.0185639600470964	3.46316680766367	3.30428764276177	0.535762995169119	3.30428764276177	0.166134947534507	17.5793034448712	19.7442412632415	47.1681706837696	310.201244826185	0.188115589022898	14.2646874883931	71.7959604131482	16.1088032464288	25.6185312333657	9.42685678612598
Male	Non-Hispanic White	82	10900303	2016000463315	W	N	6	36	647477	MFMF	NA	1	09	63	78	78	6	63	4.78816133330452	3.13791174903888	-0.0485666074436041	-0.0305398377372614	21.9626908128312	116.468575167461	1.18638486856917	1.71961642202368	0.0493557033219028	0.334895099743924	0.212801966369238	0.154726738286756	0.988113487490501	3.22478258071071	1.1863812548771	0.0114770684810469	3.32299480082055	3.22491684464652	0.64351794931176	3.22491684464652	0.0554611781723577	17.5027979069434	17.68953580038	45.867980963559	300.452607289377	0.180976875547693	14.7792254353489	70.7501830190019	13.6982217813288	21.8905160241441	8.91127866251044
Female	Other	263	15151089	2018HU1048278	O	N	3	49	9373532	MFMFF	NA	3	51	64	37	37	3	64	4.5626666957922	2.67362829221444	0.827944745503608	0.064770046835255	33.1675848063915	102.251630665792	1.84276679452166	2.52213300782955	0.116132895903069	0.282737514648535	0.253602080698142	0.344962149082196	0.786757343357743	5.00915935640621	1.84342116712461	0.0592505964947835	4.20323002731781	5.00915949149763	0.947487849989019	5.00915949163591	0.222212392955154	16.9987966342596	40.5614522519204	56.1314198987192	262.001959743128	0.0937596098085693	24.038335621931	78.1481327511522	25.7194712830647	30.0222634668298	12.0702127878558
Male	Other Hispanic	190	13603804	2018HU1011006	O	O	7	47	10783627164	FMMFMFF	NA	0	36	65	84	84	7	65	4.80184443569067	3.28163220783713	0.0591485124682283	-0.0664018921269793	28.2411665529858	113.913859410434	1.55212314991717	2.39268787475331	0.0641109701457592	0.368526285325904	0.133750945178404	0.388486355922717	1.02640825396656	4.05244994972575	1.49082620399069	0.0337958261747292	4.21497870472322	4.05248577953193	0.799240371283508	4.05248577953193	0.149158001665788	17.9432987723765	23.1344977773888	56.1200233521707	295.496151977107	0.21427492692884	14.7209103050698	86.2139395200469	17.510675307556	29.4764596037297	11.0133351631945
Female	Other	192	14200500	2014000807377	O	N	3	19	336627	FMMF	45	2	42	66	46	46	3	66	4.63519260319636	2.79041860931475	0.185024543560968	0.0494283467390008	19.5983063713063	108.269225072434	1.7902245374976	1.45505873953014	0.0735786865370032	0.225462023165954	0.0862893755909673	0.271636088341111	0.545525465348952	2.94475906721156	1.10017466229855	0.0359026966968175	2.46940207146334	2.94481350434966	0.483946478719636	2.94481350434966	0.131235465361978	17.0775268799391	23.6150064140172	35.9853478631367	273.483184995085	0.0565962209664127	14.7534582426929	51.2694638851298	14.3285853753493	18.6539379152602	7.40685686041087
Female	Non-Hispanic White	250	14203403	2017000227834	W	N	4	23	4242946	MFMFM	NA	1	42	67	49	49	4	67	4.63540478259317	2.82922401781995	-0.231064056478827	-0.0380264915920713	13.4389870149246	99.22383831344	2.06431800224503	1.05665230893955	0.0513200593965986	0.066227422533174	0.0745146779138037	0.158260010988589	0.429884514954048	2.064318024602	0.759433192885749	0.027871400698919	1.70834384318351	2.06431802483509	0.291979164390546	2.06431802483509	0.077553971205183	17.6963790249735	17.1286190885391	23.9800675961631	256.161510247106	0.0404868030778144	9.39751013359573	32.0909030960068	9.96206287196401	12.2837591525134	4.86335538625743
Female	Mexican American	179	12600900	2014001271525	W	M	1	22	31630734	MFMFMM	NA	1	26	68	22	22	1	68	4.43783733046071	2.48465536359742	0.0132336199377528	0.00215623751644468	12.1568036412539	84.7743964012202	1.87526967122996	0.727788207380214	0.0372782269283137	0.132449790858346	0.0443156320058751	0.105455358467001	0.252558325705326	1.89455559406392	1.84022456907651	0.0134058441657819	0.780824084476659	1.89455560914863	0.199758993256694	1.89455560914863	0.0655816451161547	17.4424114397018	13.3898372642127	17.7765340881608	227.640949020864	0.033040461504203	8.38579716098564	26.6052113833215	8.31518319657259	9.90650677856365	3.96646175834425
Female	Mexican American	192	13904111	2014000892983	W	M	17	13	509481715	MFFFM	NA	2	39	69	214	214	17	69	5.07041977751261	4.06026664123468	-0.0678663888928857	0.03519363597289	54.1847905735829	164.945219127295	2.41583440789597	3.18163284907485	0.234506686447075	0.583420818241477	0.709681939780837	0.595285133930112	3.05511839137497	5.86413603287181	2.41583440789597	0.217377347308909	15.4530407693504	2.41613362784313	1.55063169944805	6.56691877153549	0.357033654429867	21.4290168218832	82.6703289740485	97.0586378994057	375.02192345652	0.176801105358012	47.9357379483443	156.355460554105	44.8757916953561	53.9945019325678	22.6497716600397
Female	Other Hispanic	199	13603710	2018HU0164665	W	O	21	64	432122	MFM	30	2	36	70	256	256	21	70	5.07968313673847	4.19466814878648	0.0832734616171754	-0.0397190353177024	72.0918939724342	154.46446987135	3.00453098292015	3.51039761204366	0.27027763046134	0.685272540348426	0.770474299874901	0.810079748318047	4.3625568267133	8.16716183216003	3.00453098292015	0.145980372992178	20.0899571222435	3.59581367574165	1.99552341300212	8.167161973914	0.3273345101542	22.9943919308053	87.7661995383381	128.770920443616	357.004184415837	0.218347560170849	50.2800809210744	179.347151939085	53.5207501454632	65.4146742905136	26.815753327738
Male	Non-Hispanic White	192	14200102	2018HU0221825	W	N	4	28	4042754	FMMMM	NA	2	42	71	56	56	4	71	4.67887236012041	2.91807396009458	-0.243743030432102	-0.0234235608060143	14.5026433043251	105.156403531948	0.865895123559319	1.3014468496049	0.0343235936473927	0.143331624241934	0.110915122034789	0.172398809847929	0.601260443216357	2.3446560694081	0.862560099447217	0.0209510024724843	2.38508847448037	2.34467534093142	0.274268747357624	2.34467534093142	0.108256325403779	16.813531097704	12.6242918578971	28.0209494759756	278.28910142003	0.128279754714945	9.30454432109881	44.0294921312063	9.55230659076561	15.0402624900032	6.00101125385699
Female	Non-Hispanic White	191	13703600	2015000489557	W	N	7	10	436287	FFMF	NA	3	37	72	91	91	7	72	4.82868262339483	3.26192065014333	0.0595942664505252	-0.0543871955638115	27.7022854384724	118.426844959957	1.55226906037405	1.92427483039687	0.118960283960367	0.382399453825116	0.169936479897982	0.301052596653018	1.26127388537782	4.12814681367964	1.52099670132737	0.0482137391286769	3.59742672916041	4.13449761360499	0.737367323212978	4.13449761360499	0.189626652901634	17.2132452432142	34.2378798478463	54.5494376037769	292.509164431664	0.0951191960925537	21.6689005306213	84.8999024216792	23.3952530966282	30.5465314939482	11.1226366379556
Male	Mexican American	202	13401403	2014001021998	W	M	13	77	4613850	FMFM	NA	0	34	73	161	161	13	73	5.08659724033294	4.10460252810217	0.245409319035729	0.0599509943781718	77.4793808287325	171.83732333629	3.49290205976828	5.3290058962892	0.194183013769856	0.763602763367317	0.869706279840967	1.18597010703334	5.07951968750624	7.77112005668337	3.49290205976842	0.297315167318044	16.6401442104231	3.49290205976828	2.54794289379213	9.4946916422425	0.615060093739407	21.1819505680249	67.1108117383975	171.12197251836	402.214320871229	0.689949839216538	55.5212598711822	260.456358081728	57.0174394646004	86.7594203019893	35.1223807459854
Male	Non-Hispanic White	22	10100400	2017000515687	W	N	15	13	561560	FMM	NA	1	01	74	191	191	15	74	5.16798559791516	4.26182625286542	0.0605055942485275	0.0504446164325212	75.3641612563873	184.644104782627	3.09103674764491	4.39415853288219	0.185348605599424	0.956877521941187	0.786521304976375	1.14489834146322	4.67382190085582	8.22465705619235	3.09103674764491	0.264527718123081	20.8627199559053	3.09103674764491	1.73633774427156	8.40230902222229	0.419027142124933	23.3815157855395	64.2880824614862	160.87799139464	424.493446629719	0.688226346061198	53.3207106304409	261.835145146802	50.9671546740853	88.9015303609881	32.8031210666726
Male	Non-Hispanic White	156	13400503	2016000828994	W	N	12	34	4812187345	FMFFM	15	3	34	75	144	144	12	75	5.03332432500932	3.84522976327958	0.098014020163354	0.0349007581792761	51.5856629174508	158.892056731283	2.33237680939333	3.3038017491526	0.122301279772792	0.656615600150188	0.866725127690612	0.596321513522202	2.90504706529076	6.3309829204096	2.33237680317244	0.18283563489814	9.54378206639255	6.34005748118304	1.39864372606147	6.3400574801363	0.346452289500322	21.1172080117095	43.4457126538896	103.078062961145	379.267863542191	0.440285346676619	36.4352355023409	164.878169130472	33.2153095747853	60.8912738441318	22.1148891778644
Female	Non-Hispanic White	47	10606501	2017000312921	W	N	6	13	63230	FFF	NA	2	06	76	77	77	6	76	4.76909992622241	3.10179386793889	-0.0282248205963402	0.010501686789933	21.6189241103138	119.056909871983	1.22067481550256	1.67645912471319	0.088222306276932	0.302460907356462	0.151162723809251	0.282209766229017	0.683362288388194	3.29377972511185	1.21185306499076	0.0889139887503513	2.84953256350496	3.2941581385934	0.613556308101706	3.2941581385934	0.123872715667353	16.8384504810096	29.7473283190696	42.7355424614001	293.675564663397	0.0741981153049252	17.6273089663251	58.8333599156445	17.7894625972939	25.3724300820288	8.89729075655074
Female	Non-Hispanic White	60	10608101	2014000396751	W	N	20	23	2052171553	FMMFF	NA	2	06	77	245	245	20	77	5.10781844410782	4.1734997471573	-0.0939677338017748	-0.00312532923765124	59.1177970356702	164.793490099242	2.53306664143253	3.6243614199393	0.242613654573122	0.724618227108434	0.89600155703372	0.684283698874038	2.7622437901331	6.88558675577111	2.53306664143273	0.235454181337031	16.7400135653315	3.01273212311763	1.44997346997158	6.88558902168183	0.336907625939339	22.3384294233254	80.7512123985745	125.762432368478	374.763163650244	0.190222438430466	43.2052108371407	159.647907539051	46.8402756574382	61.6330677506108	23.7325017070038
Female	Non-Hispanic Black	155	12603206	2016000507780	B	N	0	19	353430	MFFF	6	2	26	78	8	8	0	78	4.2191768805618	2.07035850616469	-0.128136352904715	-0.0252887114856744	6.97423157556013	66.2799984435973	1.24111367254246	0.16811639025498	0.0215377660440562	0.0586355358379925	0.0177692866024941	0.0542917480881776	0.130646892014498	1.24111367254246	0.992127204953527	0.00344215118324212	0.250402966547935	1.24111367254246	0.13209397672315	1.24111367254246	0.0310510514976613	15.274932005603	7.48836474308282	9.49255361847744	189.27302578041	0.0184772105976909	4.09518257098949	15.0161727587526	4.45693624178909	5.26485924100213	2.16045791941224
Female	Other	263	14805500	2014001148153	A	N	3	34	10324293	MMMFF	NA	0	48	79	41	41	3	79	4.59753452414464	2.72825066718063	0.0599538751223151	0.00641666264478334	16.2518141460748	99.8781743479053	2.48960862804811	1.21697705175663	0.0624965013068926	0.154617179164327	0.0706524505836676	0.221996700416703	0.354870658394326	2.48986104687402	0.915994377807532	0.0333117181689348	2.06650685043937	2.48986275650868	0.399004104347154	2.48986275650868	0.0965416980128822	17.7427494576908	18.9429980554074	28.8321121611703	257.427420127485	0.0491645439544989	11.847762060601	38.6869057719111	11.9362675491903	15.6750271121782	5.89489047060004
Female	Non-Hispanic Black	192	13904300	2015001348953	B	N	5	60	123995739	MMFFMF	NA	2	39	80	63	63	5	80	4.72436283305691	3.03196033110846	-0.580723309476344	-0.0470446414538994	11.6026906248272	107.481441085993	1.73204065390433	0.966434257002661	0.0431367190310417	0.11579659186007	0.0549030290108004	0.150607242478438	0.524722641423806	1.73204065389117	0.637313289125707	0.0158896159859021	1.44677126665632	1.73204065390433	0.299503876044685	1.73204065390433	0.0719771959477695	18.2093780625787	15.4400490669757	20.4596759183098	271.989393323205	0.0337642937878777	9.4702564554906	30.0904324844635	8.95465759957032	10.7701433088256	4.33266964571536
Female	Non-Hispanic White	227	14700300	2014001046051	W	N	9	49	91273735	FFMFF	15	2	47	81	109	109	9	81	4.91356217759273	3.50810018287935	-0.175602681820986	-0.0237267689264343	28.008204946657	132.931692845987	1.49172757965047	2.07516044250979	0.12646778434804	0.298154622083947	0.267196835671215	0.362010021636364	1.36231439057487	4.0549135659434	1.49172757967803	0.0694131037194821	3.91090584374358	4.05493597277479	0.715957581310333	4.05493597277479	0.21694287496575	17.7756671436248	40.3442300734254	50.5668997611123	318.987202108476	0.0955348073482369	22.7525041527914	83.4813447156681	25.9298294282464	33.5034014595696	11.896050173518
Male	Non-Hispanic White	156	12901002	2016001237963	W	N	2	3	27272	FMM	45	2	29	82	28	28	2	82	4.51182579385893	2.6256145447487	0.368841145195951	0.062003807766271	19.9744846175378	96.9145441077718	2.54557060938401	1.31283474986817	0.0369363307502549	0.189600738338763	0.127963215678366	0.187589653261785	0.654297899212157	2.70641056336931	0.99784903066315	0.0227422882702736	2.74222713929868	2.70641140629767	0.411522527435027	2.70641140629767	0.12570598240536	18.4895162609499	13.8753258850501	29.1227148726795	261.764726072092	0.132836101315275	11.1887135538699	50.7992962279873	10.8111060334479	17.8208697729705	6.51554074517636
Male	Non-Hispanic White	189	13902100	2018HU0169734	W	N	18	39	48492218	MFFM	45	2	39	83	221	221	18	83	5.17929621283429	4.36483880983412	0.241115923201368	-0.0106120906754882	100.078485488493	175.683507282005	3.76906004028458	5.41966699041695	0.235884870447903	1.53992330054915	1.41747200277983	0.803038526357356	4.71170534570645	6.58039313772508	3.76906004028458	0.510957629648739	32.2989146109718	3.76906004028458	2.86690035619281	10.2453674178764	0.643535572979122	25.552637638783	81.7971814570553	188.475506742414	408.947586978271	0.800329448794246	61.0844257964104	288.042847742373	62.351260460613	104.684021909091	38.5337002162651
Male	Non-Hispanic White	276	15310901	2015000735625	W	N	6	26	37306815	FMMFF	NA	2	53	84	73	73	6	84	4.77034133277809	3.09496861371254	0.0338783312878649	0.00771632625990104	22.8476197860138	118.873233313377	1.22517908653322	1.81030419557545	0.0533229025930254	0.382231392620181	0.0884700351960225	0.283207294329618	1.01912749018178	3.32882665596705	1.22517901975687	0.0638936921898322	3.49570617974649	3.33038186601261	0.516499659182072	3.33038186601261	0.123634104261264	17.6235383069768	17.9067570169771	45.1707235316591	305.093153501743	0.173471893725451	14.6670071678359	66.5992066080208	14.2043971747229	24.0358576474106	9.34484326854001
Male	Non-Hispanic White	224	14400300	2015000635679	W	N	19	31	1919	MM	NA	0	44	85	238	238	19	85	5.18321336661848	4.32851468160651	0.0512595764165215	0.020354130895664	79.8200126436838	181.920085049788	2.95964285397719	4.02200670982049	0.161899126001275	1.15417337123736	0.892440176515062	0.786503073001654	4.44988515498805	8.04513574282183	2.95964285397719	0.588062713556162	26.0875277730376	2.95964285397719	2.1821825327981	8.04514338869478	0.463261154116068	25.9694745554928	61.6603994131069	141.158121700627	419.787877511186	0.565135327840417	50.375037439742	243.902577916496	52.836916672267	81.4884966535642	31.0605547965559
Male	Non-Hispanic White	156	13100200	2015000734252	W	N	12	13	934548161412	FFFMMFM	45	5	31	86	149	149	12	86	5.05145840881288	3.89484117738071	0.282054885002091	0.0345863643503018	65.1632762391277	161.748841838912	3.21336240031823	4.75225187279751	0.158463865267593	0.810458900709577	1.00262604732135	1.099831644616	2.80622621129388	7.93613809506493	3.21336240036865	0.183895920326755	12.8462233966504	3.21336240031823	1.92434236369757	8.73482462079141	0.213062277093201	19.2788444380482	58.7848181254491	136.078638234622	384.370713599249	0.552006852314864	46.9490395546732	251.617451151811	44.4768507755572	89.0726083690567	30.8780599715829
Male	Non-Hispanic White	156	12900300	2017000166413	W	N	4	7	48306320	MMFFMF	NA	2	29	87	53	53	4	87	4.66118596078942	2.88577447131073	0.1455619587952	0.0145341934112089	20.7249114854668	107.309818888945	1.12616769310366	1.57791026438123	0.0409005943796618	0.21515770821689	0.108761109350259	0.21354776734039	0.995560616487822	3.06122776102145	1.12617009693899	0.0474011665586698	3.13593554916513	3.0612318573792	0.584727481161163	3.0612318573792	0.143941814371384	17.4014020137624	15.6567179167772	39.9052374300177	282.552400721458	0.155297707068487	12.8281644521477	58.8602333652095	12.0532644877321	21.3674481891196	7.95501041698307
Female	Non-Hispanic Black	119	11800401	2018HU1196788	B	N	7	21	35314756301115	FMMFFFMF	20	4	18	88	89	89	7	88	4.83349990505703	3.33683206534918	-0.486890202941511	-0.0139454841387828	17.2867767997703	123.909866832737	1.04910279384603	1.36828049497502	0.0767141757027442	0.176679945742413	0.141278965295531	0.263058686404183	0.86153787950176	2.77954664560171	1.02254372373184	0.0457536220226516	2.44518352695506	2.7795620230071	0.529901158538487	2.7795620230071	0.137276334796621	16.9056602653558	24.6986725650272	37.3457544915361	302.608606378841	0.0631216006530294	15.4797668564252	50.018931361091	16.9495649617684	19.1926110821467	7.73576327994797
Male	Non-Hispanic White	167	12601200	2018HU0478974	W	N	14	19	384396143	MFFMMF	NA	2	26	89	176	176	14	89	5.14229379322971	4.14489911664827	-0.31967210045293	0.00652715685067289	45.8432063354114	172.228304788536	1.93004125051615	3.07336636212863	0.110950646727908	0.400067000619504	0.643300161594575	0.604350008592561	2.54162456048576	5.24082777259063	1.93004113120312	0.216766810903449	11.1765599567825	5.24638247828162	1.05237892309211	5.24639572825578	0.341586543195734	22.7524504500245	40.2007152536351	97.3984754420182	402.900494510697	0.433110311099694	31.3265720518803	144.469163977045	30.7928443681815	51.5314350488286	19.440363154693
Male	Non-Hispanic Black	190	13402002	2017000955480	B	N	12	32	1220482253	MFFFM	NA	1	34	90	153	153	12	90	5.06698880236068	4.00307553186497	-0.158097482374511	-0.042034148272013	46.7576579852298	152.163355970176	2.32821069429966	3.31358039600585	0.118389778451569	0.787190818805344	0.401749406809639	0.511733323600586	1.56756041951306	5.61034088853191	2.3282106943016	0.209236554804478	9.55525045727883	4.51668957094181	1.4713308545168	6.32873282308587	0.26474167998762	19.0830870246038	40.1641178363657	103.402383916161	367.157127803046	0.377798424127733	33.9902745763594	158.567600861859	35.7847302191564	48.2887789573764	21.3704787859834
Female	Non-Hispanic White	228	14702504	2015000090397	W	N	16	41	7140201642	MMFFF	10	4	47	91	198	198	16	91	5.09312525561189	4.13152324661509	-0.522552280974737	-0.0740656077050818	36.928033041517	151.268990780255	1.58331796269885	2.02092346670841	0.133241192662304	0.395139663187823	0.346112825667239	0.456312469897608	1.88204414300265	4.30357871370652	1.58331142409209	0.0496218525955986	10.2182193119667	4.30388667290114	0.818003363258459	4.30388667287656	0.199098707821484	22.3232909234855	46.2047859412029	63.9130161758768	351.450600630788	0.115828228632206	28.5217903748897	94.9255505696236	26.615404448995	34.8151358332859	13.9113937745688
Female	Non-Hispanic White	156	13100902	2018HU0189308	W	N	5	9	383925	FMFF	25	3	31	92	65	65	5	92	4.71257778426186	2.98314620129008	0.0536489852258137	0.0185882672657814	20.838353072184	113.427747864795	2.89027051066731	1.5711068488888	0.0777497740413093	0.183188144051167	0.109142840173283	0.257793188205381	0.331139760306767	2.93569935738614	1.08003613409592	0.0463988095419721	2.46013749976355	2.93569941967706	0.503553351154966	2.93569941967706	0.0990722553830335	18.032151975964	26.0371706999415	38.6775538253456	283.198754920818	0.0618046789611296	15.705728046644	51.2996685617918	15.3939321836803	21.3988810522244	7.64624929404039
Male	Other Hispanic	190	13602202	2018HU1138894	W	O	9	25	3463379	MFFFM	NA	2	36	93	117	117	9	93	4.93215475900712	3.60059617577204	-0.15423967322572	-0.0301017052911513	31.3858295408933	134.565767027613	1.60461245540816	2.14955545517923	0.0777165076510069	0.478052015284334	0.223659128485287	0.37582770199697	1.78220293737211	4.36158236897409	1.60460251169286	0.10480428653227	4.84489785489579	4.36176184943444	0.799178990087586	4.36176184943444	0.284007409053261	18.5598781052437	26.700068118326	65.6299228092451	334.826905169147	0.270786490974048	20.7770743475395	113.562747102202	23.7227706837817	36.3334614161924	13.431602325419
Male	Mexican American	154	12501600	2017001007264	W	M	14	39	231418204846	FMFMFM	NA	2	25	94	175	175	14	94	5.11919639759345	4.16538643998676	-0.0416241332647227	-0.0326309486450741	61.791283246366	161.833082473267	2.65113990936643	4.26756753254969	0.134931909421359	0.832253338779479	1.02739505740393	0.9595477225213	4.19741587469393	7.20496234711136	2.65113990936643	0.127168026984043	15.4661511925759	2.65113990936643	1.64188977685977	7.20654544023689	0.421480547688558	22.307439576485	52.181097421768	125.025536047939	384.520842302816	0.529087336263376	42.7953939103852	203.535806492861	41.1873950858465	70.4910025969425	25.4854637753048
Male	Non-Hispanic White	120	12001302	2017000265183	W	N	6	20	133376	FFMM	20	3	20	95	75	75	6	95	4.7777737093773	3.11250457933451	0.184322335600576	0.00711237874989658	27.0267445581565	119.687728454	1.46489901292469	1.9003152860591	0.0660950667244506	0.295505595715695	0.194600798110197	0.337068271542968	1.04468367811816	3.97652461584682	1.46508867691137	0.0373101378386001	4.10569898633514	3.98200836736067	0.709476432140382	3.98200836736067	0.139594006336321	17.4494455186401	20.5541051460526	52.2730720504269	306.659641545845	0.210133382988921	17.3120188299976	79.1817285704585	18.358029380203	26.1512045324548	11.2306351551084
Male	Non-Hispanic White	192	14201600	2016001404089	W	N	8	12	5411468	MMFM	30	2	42	96	107	107	8	96	4.90065728822216	3.45557892748445	-0.327919715110235	0.0179744898630124	22.8204990318536	136.815291386836	2.92842530933678	1.66237234943575	0.0529096597740682	0.33428861023707	0.0814578218449745	0.2682097394079	0.849395106020407	3.06333014779261	1.12700320644175	0.0357930623962008	3.20238924981843	3.063512302106	0.600411243629344	3.063512302106	0.112221968962205	19.2138004920012	18.2513312213818	41.6114899596074	339.016148038688	0.185970753243073	14.5851291627118	74.2633514291109	15.3555451877261	26.2369236832429	9.55180703906139
Female	Non-Hispanic White	185	13702100	2014001331470	W	N	7	23	71441	FFM	NA	2	37	97	92	92	7	97	4.83305237198975	3.27517916182399	-0.228999151781802	-0.110720900521504	21.0348378838734	112.430074845415	1.18558826148159	1.51304840467869	0.0726068988577217	0.197613682019348	0.199071018059029	0.318299800408631	0.936459021124044	3.19560497055446	1.17560593475142	0.0394355686023026	2.80334353771722	3.19560526935138	0.533663743281945	3.19560526935138	0.128455706385409	16.8869421945325	28.8195018137297	40.1533958242818	281.328501298004	0.0624802734534327	14.1229006075491	59.0623771796953	14.7171143313837	23.1187391901171	8.26822693433031
Female	Non-Hispanic White	130	11703105	2015000788583	W	N	1	32	4121117	FFFM	NA	1	17	98	14	14	1	98	4.33706462715402	2.26979535722706	0.477159297899003	-0.0350732154791742	15.5950671376534	73.8467065626471	2.38243042269903	0.87953840016882	0.0493049828875133	0.132401869640212	0.0699847125560733	0.172075490310185	0.331180998507824	2.38243073290795	2.3341222829779	0.027993098460435	1.12233075977832	2.38243073331252	0.249257111629137	2.38243073331252	0.0547468573322271	17.7935026698303	14.8452682424921	23.2525079489172	205.258053577234	0.0374198205637214	8.81674336304887	31.831626239106	9.27893281394829	11.2334324826631	4.49744660379389
Male	Other	56	10607106	2016000757754	O	N	21	22	21572420	MMFM	NA	1	06	99	255	255	21	99	5.16520192510822	4.21233760718756	0.0476617899075595	0.0225609016725493	70.8099407626048	179.06749947182	2.55535224353464	3.70154983662182	0.140373844849413	0.951952154331228	0.738212997583764	0.776745511545388	6.12118701220533	6.94250233234433	2.55535224353464	0.476251237852321	23.327872953155	2.5553522439585	1.70339547676551	6.94616755443207	0.257936849718279	26.7104422459807	52.2522999613639	115.191733486585	414.841295704382	0.547563462440779	43.6194708000051	197.004624419296	39.9833405782573	66.1448954427463	26.5016408922253
Female	Other	260	15151110	2014000417494	A	N	19	34	20191920	FFFF	15	2	51	100	234	234	19	100	5.08282598531343	4.10057206792683	-0.101300815094659	0.0233085686461685	54.5583762802039	165.031201159404	2.21477368234976	2.94007046624338	0.200459742030899	0.515950402158674	0.695482370305835	0.728700163259247	2.60076072176886	6.02037878871219	2.21477367756048	0.307951663234666	14.588113963221	6.01572678143354	1.31943505125323	6.0203790418603	0.281426670486659	23.6338381356863	73.7365824095416	105.185026527556	375.16853143315	0.160066300363632	42.30871144313	145.240866284037	38.0501419033622	54.2052920548679	20.7728347016791
Male	Non-Hispanic White	228	14801100	2014001166138	W	N	17	28	174622	MFF	NA	2	48	101	204	204	17	101	5.1767952648338	4.3359005353314	0.191072709949593	0.0766015888251184	92.4782281331824	191.214694866223	3.53149171747022	4.85998737868345	0.209998276009435	1.24829172430004	1.70161736617794	1.06754278490754	6.2021481583775	5.11455920262375	3.53149171747022	0.419286742700085	29.4671653105851	3.53149171747022	2.48823941992137	9.59958976282324	0.624288591355204	25.1867322739833	76.8525260795552	184.349136044233	435.773035599481	0.801573353573748	61.1419712785647	282.706765695882	59.8794979375664	92.8843591607498	38.4732216479106
Male	Non-Hispanic White	120	12100400	2015000997963	W	N	7	21	300317	FMMM	30	3	21	102	94	94	7	102	4.85479699355864	3.31543628487454	-0.0881477238738915	0.00245939120648588	25.2112055660035	128.670694506978	1.34904485197764	1.87470899321792	0.0639861675157142	0.36166627244454	0.247556572538322	0.187024100339511	1.35078137319302	3.61821938191141	1.33594212460849	0.036752972831384	3.81926587663885	3.63146720119615	0.614735112065008	3.63146720119615	0.169649862433283	17.8714789107431	21.4590860138775	56.4163287043977	323.764433930277	0.210611221398337	19.1925368558168	82.5238015701947	17.783128714392	27.5912901656502	10.8132636434368
Male	Non-Hispanic Black	227	14501102	2016000451285	B	N	19	90	19164520	MFMM	NA	3	45	103	234	234	19	103	5.18082747141555	4.4208222303992	-0.255826016147113	0.0023014996582195	64.3924386694603	178.239646075395	2.39489468945712	3.5692002707274	0.139609148952998	0.800035674834867	0.564834080596658	0.72254888168568	5.75426767025132	6.49038429608766	2.39489468945712	0.274860874632614	20.8843385578826	2.39489468945826	1.61979398577633	6.50999853566714	0.234971792232657	25.8873779514941	51.5142391388341	120.473503895647	413.402062074177	0.509380706894949	38.4728123473367	185.797444730752	36.724300781334	55.6680913078678	24.7513600768017
Female	Non-Hispanic Black	203	13604013	2014000862000	B	N	16	59	1651121850	FMFMF	35	1	36	104	195	195	16	104	5.09348732351572	4.18406809550894	0.123560189697477	0.00193372175395829	74.2641465310957	163.272575299508	3.11810656720666	4.07242448016596	0.314708820825668	0.840445677689559	0.993375719071794	0.89237017075448	4.63946246293654	8.40741524366563	3.11810656720666	0.26149736058206	19.750312503511	3.11810656720666	1.91105891981923	8.47589242081714	0.349270901119525	22.8170649175807	101.257513109753	150.943296763789	372.166081635378	0.21962023538424	55.6570651834674	191.518880184558	51.2559910232534	82.7441708357425	29.011337580971
Male	Non-Hispanic White	225	14703208	2015001400913	W	N	21	25	6021	MM	NA	3	47	105	253	253	21	105	5.17566170376381	4.33639521743713	-0.0790932356035729	0.0104143915007314	70.6191943245549	178.765715262947	2.55766140906983	3.39355478719933	0.143572055951062	0.969591573076724	1.12030952338634	0.695219453136217	5.9627766105553	6.93008925198494	2.55766140906983	0.470845975790807	23.4536220614917	2.55766140906983	1.43509238765201	6.95244453145199	0.372291037613791	26.6108456241038	52.6317521910565	123.621186711875	414.316833093909	0.579446367043883	43.1135540704625	206.681415444544	41.9228308996701	77.8454805332731	26.492054378308
Female	Non-Hispanic White	84	11303300	2016001328923	W	N	10	40	521045	MFF	2	2	13	106	122	122	10	106	4.95687723134006	3.64329333129898	-0.246359061621897	-0.0773339707446924	29.8723788653255	131.57055670248	1.51288087576456	2.1756112746834	0.110518059627306	0.334695362355138	0.326568907003596	0.367488567724343	1.99738032484101	4.11179062403111	1.51279152999538	0.0516342680087441	4.45881726836736	4.112193726216	0.872341732606245	4.112193726216	0.178718086244346	18.7465264133981	42.9649983023203	56.143390997771	316.534383439888	0.0975889975959088	23.0039246009379	85.3330026268562	23.9682793638227	31.1254944632119	11.9712633554542
Female	Other Hispanic	47	10606506	2018HU0488149	W	O	18	68	195216472218	FMFFFF	NA	2	06	107	221	221	18	107	5.07497731839661	4.1474024315315	0.0537001903819212	0.0523280919363056	66.7599014035498	168.562299315164	2.83586832628171	3.80826801055129	0.267028343870066	0.695441721771703	0.729138367482577	0.868541844145696	4.68424337481205	6.75126470845965	2.83586832626028	0.44467210610495	18.6537910124734	2.85839215636368	1.49486457849067	7.70868933913799	0.389813237918281	22.5412557012432	90.8571321691082	123.2770975265	381.173054941304	0.228802285989159	53.9138609344417	183.892311855698	53.6879373896382	70.5609985483981	27.0239148332978
Male	Other	262	14802307	2016000374763	A	N	1	105	133436	MFMM	NA	3	48	108	22	22	1	108	4.44375439538636	2.49185847029371	-0.124305026815073	-0.0418583232786676	10.6712524985268	81.6054518893494	1.6588852105022	0.718423395870956	0.0186544023268457	0.148575914579317	0.0347244555498374	0.124387236814971	0.201800302734402	1.6588851968993	1.61172630164233	0.013681253280306	0.627112139875243	1.65888521135433	0.178584536683726	1.65888521135433	0.0519616198361954	17.4861235455596	6.64293739240821	17.3634831759286	230.095849966241	0.0711719131047033	5.84781441832621	27.8301707767529	5.46670961750406	8.74623794688478	3.51051350440164
Female	Non-Hispanic White	269	15151167	2015001376013	W	N	5	33	1133513	MFFF	15	2	51	109	66	66	5	109	4.71735884001292	2.99283887362652	0.38653566976989	0.0547481364492022	29.3524067142101	118.167956954221	1.5965427295375	2.17892717518691	0.115456494841694	0.396248675234374	0.194382539821919	0.336532584552076	1.52563072169511	4.33985306362112	1.60624961808162	0.107275676731766	3.69427690014159	4.33985308984586	0.598483069145021	4.33985308984586	0.183765807906982	17.3849795473936	38.6054994317451	55.5059993095993	292.029451663897	0.0939978617415951	22.2688657183416	87.0058905207193	25.1843121817612	34.6031110725036	11.6559374460448
Female	Non-Hispanic White	156	12801700	2018HU1157652	W	N	1	62	512426	FFFM	10	3	28	110	14	14	1	110	4.33706462715402	2.26979535722706	-0.165374713335649	-0.0167829043284602	8.20234955143884	75.209813628892	1.42763399967774	0.573814365919638	0.025427971567015	0.0779299480109157	0.0305065987154452	0.089827862716054	0.232125353435592	1.42763399968076	0.674853573436469	0.00524306876311785	0.367919844577246	1.42763399968076	0.166484210852719	1.42763399968076	0.0452117576573472	15.617656725275	9.1940221808017	13.268752058437	208.093129778836	0.021221649699449	5.22269228440701	19.3256834383742	5.33439320326369	6.97958400114567	2.7322482170719
Male	Other Hispanic	52	10602903	2017001269850	O	O	16	17	42141611	MFMF	NA	1	06	111	193	193	16	111	5.14879363231104	4.21033781589899	-0.198794438992047	-0.12239467737609	55.2320486840461	152.383284417167	2.203643035282	3.1108187430755	0.109350854248416	0.596181962881807	0.396858609240626	0.647931860921589	2.75165803372296	5.77729407325076	2.203643035282	0.280756229874507	16.6960152509639	4.98144638245333	1.32103541206353	5.99012281918918	0.241198534186616	24.0639726125051	41.6547086359975	96.7750908538327	367.555057300655	0.383788779598874	31.6229679498885	154.186656338826	30.5746590789406	56.5465628775888	20.2490035525816
Male	Non-Hispanic White	118	11703108	2018HU0714264	W	N	11	17	411643711	MFMFM	NA	1	17	112	132	132	11	112	4.9944825827374	3.73369638184224	0.245745590283721	-0.0243954582291906	53.4871785615782	144.039436189298	2.4918411170031	3.79524866048164	0.12529170455957	0.753038823388991	0.252991557766852	0.655640654721844	3.26893822967427	6.77341236048391	2.49183121151083	0.139229137815576	8.80659001167215	6.77349950160353	1.29387598688224	6.77349950153836	0.336210906061003	20.4650086709318	40.5130474478322	100.498806803069	352.355021242664	0.412760119094637	36.9753282640488	149.781123809037	33.7736023766761	62.3963081270261	21.9502309866257
Male	Non-Hispanic Black	148	12501400	2014001110633	B	N	17	22	1753	MM	NA	1	25	113	205	205	17	113	5.16796726264532	4.32659164703958	-0.230198392692745	0.005523761265915	60.1230475276971	176.530033595436	2.36358528374374	3.53898847394936	0.141534998119875	0.969611667840124	1.05363764056143	0.718952039860041	2.96779245797419	6.41828083931157	2.36358528374374	0.243925424060354	19.3431913677743	2.36359135978644	1.68816267183896	6.42489092681375	0.480752142111814	24.4372236708407	43.6530943053769	113.760818598329	410.424575935711	0.487168627109113	41.5254637959236	179.417005575068	40.2664662366771	63.9421091323806	24.2518371942103
Male	Non-Hispanic White	84	11304100	2014000387236	W	N	11	22	214411	FFM	30	3	13	114	135	135	11	114	5.00526659499132	3.76300999468305	-0.470443049252987	-0.082230202261194	26.9118563344264	137.419239125046	1.36960889346838	2.04306225431122	0.0601122105712583	0.48999109692281	0.28543479588855	0.310940749516656	1.0553436004911	3.69561996848836	1.35954266640598	0.0909809893141574	4.83505505867999	3.69562012510613	0.655002635856944	3.69562012510613	0.190740306646848	18.7947782025178	24.0612582660114	58.0291636329886	340.137926512144	0.223377267043528	17.5172236843613	96.0534608100038	20.0260669316992	31.2925039388839	11.560800588903
Male	Other Hispanic	187	13602500	2017000122898	W	O	18	37	221841	FMF	5	3	36	115	227	227	18	115	5.15869564144289	4.3251702354075	0.236804549883366	0.0432335819617289	95.7724231799553	181.622294082669	3.50657699427191	4.93896771900639	0.198732391513048	1.18227758381254	1.21079705281147	1.08616394204509	5.75535423402966	7.82649250101054	3.50657699427191	0.636577833421309	30.7052261167312	3.50657699427191	2.47921974915644	9.53186452362105	0.410272892709155	26.312225950379	73.941869068013	177.016278142928	419.272398553562	0.816054139563382	58.578567921892	268.580088396894	58.9715153506569	96.0320030919622	36.755273677528
Female	Non-Hispanic White	192	13903500	2016001214370	W	N	15	21	57531315	MFFF	30	3	39	116	185	185	15	116	5.09786377769369	4.11804036643461	-0.167951864119405	0.0196183647896628	51.9399634384392	166.914572978206	2.1706348835845	2.75878837439315	0.182501169698377	0.373284044813741	0.305095762316571	0.728063966556286	2.99827057950758	5.7783482308876	2.17063488358205	0.194782123463947	13.2425033422138	5.90039677810034	1.49331356673548	5.90039736025979	0.273406753215416	22.928466197086	73.6052911749799	105.926916097803	378.375100730541	0.171689477762698	44.0037688360445	133.71959769926	40.1717831624156	56.6906322711492	20.5328548181146
Male	Other	191	13604007	2016000982872	A	N	9	102	123621915	FFFMM	15	2	36	117	109	109	9	117	4.89071638356084	3.41973263482682	0.0637786799694686	0.0205937757380609	32.5738987160251	135.817240113114	1.85721541330331	2.53941734729572	0.0730260119869384	0.437964667188885	0.316200909627871	0.22914595662588	1.55769006242273	4.50987865634448	1.65915651971687	0.105535649194735	5.07451880169796	4.48698845047702	0.792845327651911	4.5100550181157	0.224979169960285	18.6328063846372	29.1150141286079	73.1905511722574	337.15963969733	0.265193435261102	22.421543348968	110.230974190297	22.6379916058332	37.6408873004745	13.9850153597304
Female	Non-Hispanic White	130	11600701	2014001230990	W	N	0	38	24025	FFM	NA	0	16	118	1	1	0	118	4.05873557089889	1.80562835151764	0.488210138528379	0.0185424094118381	9.91291537303326	58.9846936337038	1.73629795512262	0.217314160679036	0.0286724348150097	0.0985050116511603	0.0392003118906874	0.0929498162432905	0.138872124370008	1.73629795512262	1.43107937619624	0.00180491540696092	0.43226961662629	1.73629795512262	0.145084835951947	1.73629795512262	0.044373620123487	15.5192820714148	9.06260823275978	13.7889487488358	173.422863878434	0.0239830683375108	5.28867122697631	18.3632587653496	5.44495132343286	7.0454217773549	2.76933908003139
Female	Non-Hispanic White	48	10607315	2018HU0366299	W	N	5	32	9540183817142015	MFFFMMFMM	50	2	06	119	61	61	5	119	4.69365212556334	2.9447029277401	-0.0740799636927261	-0.0531009014671971	17.6480088511135	103.601439456451	2.65934224719926	1.26962931589428	0.0649713457810787	0.17107161218032	0.124150181592881	0.191342725402861	0.478726530211601	2.65950061619669	0.978375680691411	0.0216008074825709	2.28372203034175	2.6595006173712	0.528324069036038	2.6595006173712	0.0867305349224116	18.038071303734	21.978799558981	30.4802853678379	264.59168986195	0.050650434657211	12.2627969196065	47.3214310064157	12.8787443219697	15.0577689243189	6.47175133913592
Female	Non-Hispanic White	228	14800900	2018HU0911791	W	N	3	69	65227326	FFFFFM	NA	6	48	120	36	36	3	120	4.56474395286643	2.69596190292437	0.270180352529908	0.0246826764789294	19.4168696044475	98.4379725331662	2.61336056207984	1.42094772843569	0.0625334578668148	0.194050590969	0.120906770829131	0.208244253561706	0.316154473686208	2.75865534327108	1.06565668703558	0.0306946600081254	2.31915841759855	2.75865534616696	0.456552581522776	2.75865534616696	0.103570858795313	17.8488428213236	21.8327441763186	33.5995468914847	254.638374315521	0.0500498542693681	11.4567086127795	45.0002037886143	12.9144186412314	15.8760943814474	6.46051032393309
Male	Non-Hispanic Black	48	10609502	2016000604137	B	N	15	82	18644515	MFFM	NA	3	06	121	181	181	15	121	5.15085609628617	4.24276173946158	0.05868625546274	-0.0405694348533724	73.8065879268859	165.717852982643	3.10717868437388	4.06328305323042	0.171837701378299	0.914847522384254	1.22444333373855	0.774248728240199	3.71838806742754	7.77163336908694	3.10717868437388	0.342727873546122	20.7330004850979	3.10717868437388	1.98398698219332	8.44618735547036	0.454766649275543	22.7535704972688	56.5987711339759	158.012372917052	391.423033834702	0.644749734031664	47.4890230210606	220.520417039376	52.0838550632253	79.1645485840936	30.4055326826036
Male	Non-Hispanic White	274	14802501	2015000144952	W	N	17	22	1217471546	MMFFM	NA	1	48	122	210	210	17	122	5.17589457036417	4.34976401871264	-0.0937172776837904	0.00287009194403753	70.5306058418141	177.463448241196	2.70917651889508	3.87844375279715	0.148256924203544	0.805161520332138	0.936649628669459	0.815126946933767	5.04977115123042	7.01309219261318	2.70917651889508	0.204965984698699	22.3600170855075	2.70917651889508	1.65953072784762	7.36430530140043	0.477825073125765	25.0339646936625	53.4716697393579	130.897816055241	412.051113581577	0.587266230632379	41.9468246756117	207.736339541176	41.0128154102988	73.0753414538358	27.9079800374945
Male	Other Hispanic	202	13401504	2017000863700	B	O	12	32	4412845	MMMF	NA	0	34	123	146	146	12	123	5.0276946231344	3.84684076729359	-0.370395002427646	-0.100263659291663	32.344557373671	138.024466627246	1.53779975237619	2.34938190424208	0.0722241946330668	0.496080613065364	0.3062984050699	0.416621202170938	1.85321229977986	4.11798314622054	1.53779975237619	0.121660282850916	6.22436362223641	4.18017312269279	0.879502284230947	4.18017312269302	0.195684413382538	20.0329804510998	25.5680082031549	66.0001733771854	341.260846256726	0.254223908191255	21.4706368374287	104.812345038808	20.165393163705	36.1600977603327	13.1197711217321
Male	Non-Hispanic White	227	14700400	2014001216916	W	N	20	14	2039171538	MFMMM	NA	2	47	124	249	249	20	124	5.16947150944234	4.32618695795363	0.260089821948434	0.0358586293038782	98.1283955565739	182.241027662885	3.35775650097565	4.66535700697108	0.226186694446845	0.905941175072996	1.34003470055204	1.14235465844534	8.95664875126567	9.12725983363864	3.35775650097565	0.551604840006452	29.9940852262757	3.35775650097565	2.50805655020135	9.12732844586673	0.666422538739825	28.2243929921843	66.9300178434704	180.68452724981	420.343196056792	0.727952425006252	51.385493687588	273.257735979671	50.3522832720645	88.1395936385749	35.2852524800144
Male	Non-Hispanic White	120	12000603	2016000481930	W	N	12	46	8126424613	FMFFMM	45	2	20	125	152	152	12	125	5.06127138736273	3.92592731721887	-0.191009532884295	-0.0120219092844652	41.8845818527729	155.905410137936	1.96967611295836	2.85746120012901	0.10420375760551	0.494347268922247	0.375832756665231	0.570684434681582	2.26003957956099	5.34617865915511	1.96690353910049	0.19113543486964	8.05687325667726	5.34659814866826	1.07360465063155	5.34659814866855	0.0855435478216285	20.2946802015156	35.7208632322922	87.2395275234842	373.908462795124	0.364242426503931	30.7797652634345	139.319070436296	27.2789083065673	48.0203153136821	18.3860469692838
Female	Non-Hispanic White	41	10605905	2015000896482	W	N	14	21	3514171515	FFFFM	NA	2	06	126	178	178	14	126	5.09425715808713	4.09820484385698	0.206347567296156	0.0748843185822416	74.036070316366	175.763875303431	3.2904376468536	4.66470579029278	0.314808110894366	0.722568368629336	0.90644918488774	1.10663771313869	5.06846329332831	5.56814189941342	3.2904376468536	0.361787625841338	18.7269035332364	3.2904376468536	2.60996083204164	8.94433686311967	0.429836083406544	21.5003717627535	103.957480267077	159.045914532805	393.322754936285	0.281151807940956	62.5670569191608	238.170108285684	68.5184208372853	79.7505525111626	32.3551000051632
Female	Other Hispanic	46	10601905	2014000302253	O	O	4	20	43030	FFM	NA	0	06	127	56	56	4	127	4.67060094540772	2.94928719864544	-0.388053647717978	-0.110469947722326	12.9517841509177	95.5960018648468	1.99626952207414	1.02459358850511	0.0468626282200222	0.160071047786821	0.0621221853473132	0.142008509158978	0.295428436406501	1.99626949353822	0.734386579343147	0.0209987864186872	1.6935409748423	1.99626952207414	0.27367023153091	1.99626952207414	0.0659771884574644	17.6361954707316	16.0499210264869	23.2946592919599	249.104546787582	0.0349624993980357	8.72366052659096	32.7566717775229	9.35851856260119	11.755654118263	4.57347550717397
Female	Non-Hispanic White	202	13500802	2018HU1081450	W	N	16	60	1610191439121940	FMFMFMFM	NA	0	35	128	201	201	16	128	5.09351943590492	4.13358241470599	0.0758366406654068	0.0563047272856336	67.3174207542156	172.401173179261	2.84793542092494	3.91846161639955	0.261952969645643	0.347887645888339	0.807701142063794	0.772565849634235	5.20497353397741	7.2531251851104	2.84793542092494	0.325071057551443	18.0067484855263	2.84793542092494	1.7720870466967	7.74149085906569	0.502977329428073	22.6372707961027	98.9749277623584	128.079102138574	387.665381647027	0.223837963316466	51.6345678839115	195.408892626494	53.6965310369861	74.4744731675588	27.6011492964738
Male	Non-Hispanic White	192	13904604	2016000208905	W	N	3	15	243354	MMMM	45	0	39	129	40	40	3	129	4.58721773511958	2.75539257804058	-0.112314017630473	-0.0395655536117818	14.0564105750841	94.4104892115476	1.16251535980175	1.21307775947695	0.0308076035496748	0.135307313788744	0.0664260724514696	0.194397603284781	0.0887101205459792	2.29388642564607	0.959068007237187	0.0192451035536701	2.31766508622055	2.29388653591798	0.366774532313685	2.29388653591798	0.0632502629628623	16.6570075900986	10.4530756985484	25.1038385580567	256.675603176777	0.113242144796104	8.85851606902402	42.7787123096254	8.84669881344487	13.8945329681919	5.41504475420424
Female	Other Hispanic	190	13601202	2014000403016	W	O	13	13	13434515	FFMF	NA	1	36	130	157	157	13	130	5.0504405565934	3.98817162793102	0.214571533633417	0.0225238692733616	66.869513555857	159.64688792594	3.02188239174619	3.82943354236551	0.252054677160735	0.83595081165716	0.851088855596573	0.868501185800866	5.33554346882898	8.21141158526248	3.02188239174786	0.15371339602922	14.9352339123478	3.02188337978402	1.38494265884744	8.21432797038947	0.41240607526989	21.1284301925518	89.7901564126373	131.6242689632	365.950378411148	0.221820021670371	53.5080295217102	194.980445887391	58.1603437022372	72.7584065359841	27.6464751193375
Male	Non-Hispanic White	47	10605303	2017000986770	W	N	5	50	1512511173839	FMMMMFM	20	0	06	131	60	60	5	131	4.70321745713255	2.96243807776498	0.0487816336630626	-0.0142195965551058	20.3121597956539	108.744148386128	1.08904727108917	1.49284637494559	0.0439776032790759	0.226286266987575	0.162944464749469	0.204769368773344	1.00597708064202	2.96033739732437	1.08904726784095	0.044297072354191	3.03499370331438	2.96033739766675	0.53110619586376	2.96033739766675	0.169355021317598	17.4605298139954	14.3893707954168	33.7720525333233	285.380193186676	0.157732457547285	11.8544871549516	63.2763976617001	12.7443623518518	20.6913366795091	7.76981298994664
Female	Non-Hispanic White	178	12202402	2015000626503	W	N	14	17	35414734	FMFFM	NA	1	22	132	175	175	14	132	5.09043459636433	4.08662458855085	-0.200642574733512	0.00655012068924456	48.7147575431269	163.52807972906	2.23355568908286	3.22053349204291	0.202329599029188	0.697921105785568	0.680778348066469	0.60431091309578	2.50494536345774	6.05318008587738	2.23355568908286	0.252229661531455	12.5712409967586	2.24006468091436	1.44848385064414	6.07143384248396	0.352703714673628	20.8104065104783	70.1046761493875	96.1277898350103	372.602796865637	0.160918442822186	40.7121761703452	137.813654182691	41.8940808803927	52.7776016823454	20.8057274176857
Male	Non-Hispanic Black	47	10606703	2017000475424	B	N	13	47	35151339	FFMM	90	2	06	133	157	157	13	133	5.08425704937609	4.03110404751947	0.013954818577658	-0.0177891033171782	57.1145480457224	158.613106747248	2.55059055591056	3.77985931965283	0.130275219399622	0.737581330434735	0.776898841170673	0.79308268474849	2.67609158438332	6.64994070981669	2.55059055591056	0.136686361431329	12.383707307917	5.64267873806837	1.63393270251848	6.9332239597151	0.342053756694153	21.3926760464566	47.0025791715852	115.012279375679	378.768373507819	0.468813087168772	40.4365736617727	172.359772452721	37.5924771620688	61.3932097794021	24.1520759086662
Female	Non-Hispanic White	84	11302004	2016000969781	W	N	8	82	4684310	FFMM	25	4	13	134	100	100	8	134	4.87014076384196	3.38639929858999	-0.0571554808711153	0.0389118377670579	27.9172232099979	135.51097069879	1.5583949921258	2.06996750616188	0.119812240067075	0.26245510755261	0.256745910427931	0.352579013559336	1.21297515576851	4.109848881292	1.51248953512165	0.0880989163050901	3.65921265889614	4.11137242337899	0.803930242548349	4.11137242337898	0.190927109835981	17.4577977085697	41.4068470919046	58.4074988425504	323.618022666235	0.0927560577388042	24.0400411443619	87.8618701349904	23.9792997716658	31.2189072506895	12.2367206388295
Female	Mexican American	83	11208302	2014000936616	W	M	2	69	0837302	MMMFF	NA	3	12	135	32	32	2	135	4.51708981602043	2.61002604822908	-0.169482104945099	-0.084263590652963	11.4792831238504	84.1689615290651	1.65261706575028	0.786639527217773	0.0369097636711549	0.117944571372461	0.0517491492184231	0.104675980765131	0.279516933814121	1.84221771818696	0.737942570697489	0.0169145498783491	1.54395089705277	1.8422177181871	0.202420539914375	1.8422177181871	0.0557038751190097	16.9382404757275	13.8300487730907	18.1442635517808	226.420546595243	0.0317486913660138	7.18652058226237	26.8132754394327	7.91008366771452	11.2011229674548	3.83620949759854
Female	Non-Hispanic White	119	11801500	2015000644259	W	N	8	25	17642837	FFFFM	25	2	18	136	106	106	8	136	4.90058246371169	3.47041143307952	-0.156927360685924	-0.00516927200958038	27.4807036354922	133.675228700384	2.56905970597442	2.05283497532474	0.109116193837411	0.336129444026996	0.27136830775622	0.369979254519638	1.02790431305635	3.88183550898834	1.42806562011854	0.068335450668819	3.51228521538028	3.88187271831725	0.628490974896553	3.88187271831725	0.188895617690155	18.2432801483693	42.1704468370965	50.2382799135933	320.324428245715	0.0911072798576351	23.5723142559183	69.1881454586355	20.8489948778068	29.9806355134483	11.4360719149797
Female	Other	225	14702505	2017001289999	O	N	20	47	2056	FF	NA	3	47	137	241	241	20	137	5.0754334347758	4.09180688399848	0.205842041027778	0.00216644573858267	73.5267234893002	160.388641689322	3.10450876398419	4.16883840787384	0.279130474947197	1.01701554480568	1.14334965141664	0.898278735151776	2.92012256160481	8.43797945797695	3.10450876398419	0.317815629023523	20.5339248305358	3.10450876398419	1.72104822882381	8.43892975892661	0.503830351676726	22.6838511594147	94.170264802213	122.184710633369	367.224852326535	0.227556413186391	57.0803976138105	200.132111623433	54.992203707945	74.3710234443976	28.5013193100132
Male	Other	264	15311506	2018HU0487038	A	N	3	28	227325	MMMF	30	3	53	138	39	39	3	138	4.58585093037321	2.72692706015903	0.0736701272047357	0.00450876869265661	16.4544702392839	98.5298648890056	1.33962207848821	1.31604356521371	0.0335982227536166	0.256048262288717	0.0758729159182268	0.15464399557839	0.603674573818045	2.58517072066605	0.95161359379121	0.034701375947077	2.65002366097514	2.5851711929095	0.455288590354598	2.5851711929095	0.0923366090912698	17.3017119992066	12.4787214692773	32.9503690803919	265.030173379505	0.120863386677933	9.9821842750942	45.9142818160498	10.437403276694	16.0438077589173	6.30129998202676
Female	Non-Hispanic White	156	12901100	2017001368677	W	N	0	59	25024	MFF	NA	3	29	139	0	0	0	139	4.0336738583516	1.76654290652981	0.130937358603827	0.0389867417690131	6.66906896770984	58.7129666938666	1.16456221075792	0.157513573643004	0.019033729130617	0.0525852700337956	0.0217598575630835	0.0613789062482693	0.0826795585898776	1.16456221075792	1.16383617441397	0.00604100183875316	0.170319806766329	1.16456221075792	0.118172268760025	1.16456221075792	0.0232138105561613	15.5667158183566	6.70130562944523	9.09606577893211	172.823333103528	0.0156011905006712	3.64378122145291	12.0783772107325	3.52510094500655	4.92887807404274	1.85101780803659
Male	Other	11	10400122	2016001072960	N	N	15	20	15404581613	MFMMMM	20	2	04	140	180	180	15	140	5.14663925020446	4.10155915545756	0.072794512887163	0.0109817093992584	64.9978159358846	173.750603809894	2.78620125936241	3.48118724489053	0.161228945639163	0.989254798789968	1.13137923324433	0.958066956726195	3.04203984412193	6.31219618487703	2.78620125935233	0.243376351668758	19.0292487825979	3.12424436350052	1.83326255052957	7.57368020684305	0.248487853450162	22.3284712357764	59.8824291099901	127.631229775732	405.568435181288	0.534331782773974	44.5844930926757	225.084542194507	44.6982076577354	72.5791947409908	28.2498821213914
Male	Non-Hispanic White	154	12101902	2016000980510	W	N	10	30	391039863	FMMMMF	NA	1	21	141	129	129	10	141	4.98232413262054	3.70214727191537	-0.31062788232389	-0.035186582297423	29.7110606694078	140.771435507036	1.80802711402409	2.05348830245128	0.0691750117934263	0.411469427751501	0.329887235969534	0.33152266859895	1.81965175207115	4.00129734086438	1.47199857012298	0.114543038132392	4.78337520345148	4.00130696468297	0.821640358084431	4.00130696468299	0.164844082784135	19.184164056457	26.3067806538261	63.1768524587282	346.342118995246	0.276732308268605	22.3665489890796	107.313081598994	20.7664264857137	32.7966113848261	12.7453775983591
Female	Non-Hispanic White	190	13402303	2014000549333	W	N	2	28	35352	MFF	NA	0	34	142	28	28	2	142	4.50087698498267	2.58613621549756	-0.324694895781383	-0.041184299562092	9.59691142087313	86.4609343074657	1.49454806076964	0.727308234203313	0.0351157263447284	0.0932562538815661	0.0243264144476013	0.118980727078133	0.298865016177463	1.49454806076964	0.551542365962966	0.0105113699421843	1.25400433935709	1.49454806076964	0.200598647358857	1.49454806076964	0.056214042102546	17.4548484651986	11.5148456004603	15.5579025705699	231.029161026314	0.0244193279566763	6.92910739532889	21.5140340769318	6.92718311916299	8.49140037632737	3.1755738218363
Male	Non-Hispanic Black	192	14200701	2014001088114	B	N	2	16	4615382	MMFM	NA	3	42	143	25	25	2	143	4.48373196603008	2.58186449715794	0.192649631290451	0.0261106558988058	16.0308361758938	90.9075105360208	2.28590865308474	1.25911095058669	0.0279788164705358	0.193115342987301	0.0643211677315104	0.188676149744771	0.386918380542606	2.39478797565923	0.912350785407958	0.0304259641063119	2.42035042568263	2.39478797565975	0.339340290428265	2.39478797565975	0.0741915651898345	18.1963209749001	11.6793634360447	27.1946864622073	249.49924108942	0.115744982958596	8.44732639507822	44.8398466612926	9.12986081390001	13.7280565240537	5.49517875815593
Male	Non-Hispanic White	153	12901001	2015000460086	W	N	19	17	1952	MF	10	0	29	144	234	234	19	144	5.18668362080819	4.33483488404173	-0.293003353346055	-0.0325388874167092	56.9305173669726	173.147656005196	2.15573143526057	3.30950996475116	0.115002690364892	0.886185967251564	0.514630509430688	0.656763569067058	4.78447564911934	5.85446423450699	2.15573143526057	0.130369356796532	18.7980729947581	2.15584347711343	1.33258372203209	5.85988551338399	0.29737083467374	25.4089099577891	45.7154736445538	108.798063664393	404.512426657225	0.478803627852807	36.2742337342857	168.862645664672	36.573075797327	57.861988436968	21.8005038524629
Male	Non-Hispanic White	130	11703106	2014000933229	W	N	3	13	395293	MFFM	NA	2	17	145	44	44	3	145	4.61069170939792	2.79532231554535	-0.108670473439141	-0.0153133757473247	14.6824344235744	99.0255931756489	1.16737161000018	1.24651014811983	0.0294347204672412	0.202156792358686	0.0671892594904026	0.169613596525476	0.380050683294701	2.34374289197767	0.876106748893417	0.0351077846283501	2.39224671069907	2.34374289306237	0.412087055808136	2.34374289306237	0.0783382411959027	17.0287427043653	11.3446547868074	26.1290029557692	266.029620342281	0.114026466994906	8.88476421818847	42.6365670122904	9.21550131383454	13.796591243865	5.73436706868946
Male	Mexican American	178	12202500	2016000340097	O	M	17	4	504917	FMM	NA	2	22	146	212	212	17	146	5.13915467944382	4.3244361686236	0.161860239690195	0.0331331576585435	88.7919868999948	176.317762714013	3.38130766474309	5.11655800870091	0.188212700950796	0.911323254788779	1.08027037508969	1.10894862080249	4.16662490283461	7.63270368469014	3.38130766474309	0.305930174001583	28.3192719227415	3.38130766474309	2.47682435002371	9.19134718150035	0.657788848879977	25.2596591921608	66.8695681954895	158.747058612213	410.054379914592	0.739028937926632	52.0596688143441	282.315580857854	55.0904635807005	81.2516586424277	34.6630004441671
Female	Non-Hispanic White	155	12603005	2017000989089	W	N	2	55	432230	MMFF	NA	2	26	147	32	32	2	147	4.53471707216928	2.64545159428727	0.037732192857137	0.0439349023759078	14.6316031278314	97.3830308818977	2.20070335696581	1.05127530931628	0.0531497781819015	0.141131861780402	0.0587465280575212	0.17467885161192	0.546400570960053	2.20070592708447	0.964583528255747	0.03071275307447	1.86396279539133	2.20070592708551	0.299061684479021	2.20070592708551	0.0883320767750713	18.0727558435222	18.4497892207733	23.8988541450195	252.588935778975	0.0418887858708637	10.9186510359637	32.7771845230237	10.133868702936	14.2734243741154	5.11236511852166
Male	Non-Hispanic White	261	15500800	2016000087866	W	N	18	25	185252	MFM	NA	1	55	148	221	221	18	148	5.17929621283429	4.36483880983412	0.189071683596192	0.0392756311373283	95.0031922274605	184.67025770972	3.52336548835773	4.70686031006939	0.217847241838524	1.20540806502657	0.927465897819888	0.922314639355277	5.47722773957524	7.59280081749141	3.52336548835773	0.482861017211869	30.3162237862975	3.52336548835773	3.06671192811119	9.57750038201868	0.684152916645742	25.9637630672662	71.4547227752743	184.233837280839	424.538539660023	0.740301815307885	61.5543035062024	286.502216831987	59.8786699092633	98.7102113856866	37.3951109778978
Female	Other Hispanic	58	10603745	2017001248000	W	O	5	32	514183672710	FFFFMMM	NA	2	06	149	61	61	5	149	4.6959420839897	3.00285901277011	-0.317739758412353	-0.087097147020923	14.6599495388899	100.368151115619	1.03058998364716	1.10936350940286	0.0557782702836596	0.249789464160678	0.0741685025982596	0.170256799500638	0.449797489191231	2.44098029556353	0.897986603645863	0.0172159896455587	2.10081746056313	2.44098033016927	0.467306289771845	2.44098033016927	0.0952097060131673	16.3253566385467	19.0311475416318	28.7546343247122	258.373995290816	0.0469084626402581	11.244315405461	40.4090009571178	11.8060534736438	14.9497044996297	5.80040886240314
Female	Non-Hispanic White	228	14703204	2014000074973	W	N	16	18	1640121538	FMMMF	30	3	47	150	197	197	16	150	5.0933274581774	4.13112584747393	-0.12351569467173	0.0255006706287011	55.0152353260831	167.139388976189	2.43837478109795	3.37854016743892	0.220666027670325	0.675206484684856	0.494788527496513	0.641867006988495	2.60710218228332	6.62337748301101	2.43837478109795	0.26781118235109	15.3742177383868	2.43837478109795	1.72029853173791	6.62818985403104	0.324726183032397	21.5622557092355	79.6810039404825	109.693306292566	378.757259373539	0.194420871225557	45.5113248203818	159.517649282897	49.0628536263924	59.25603809186	23.0888037353553
Male	Non-Hispanic White	183	13902700	2018HU0553872	W	N	21	71	21	M	8	2	39	151	262	262	21	151	5.19257713713775	4.37057170797774	-0.213886061462131	-0.0393538685935967	63.8595184481777	172.988180013833	2.39805554151208	3.57802246533157	0.138358449376866	1.0880357660173	1.23679485558249	0.717955775942367	3.30477949903047	6.51535903687554	2.39805554151208	0.438579395056902	21.9381619181885	2.39805554754895	1.40056268504991	6.51859075136645	0.194578089887823	25.6297078373312	44.4143429647942	112.582347360383	404.23296524994	0.515487570121216	42.7050939497139	187.394474363154	37.0413146015904	68.051241946012	24.2343275594869
Female	Non-Hispanic White	59	10607108	2017000442439	W	N	15	13	711572	MFF	18	1	06	152	182	182	15	152	5.09750888468348	4.11067219507655	-0.124842325503473	-0.0605562240135552	53.8299427787516	154.00000897147	2.42530480466135	3.42089848526056	0.224320798512892	0.579974196781315	0.549597895171053	0.634040363264697	2.97852511206091	6.01265906383522	2.42530430453364	0.219360975740155	14.702327723503	2.42530430509377	1.7295885898018	6.5926606188256	0.348733616269341	21.1951293609336	75.7107198602629	117.932310136577	356.198771591213	0.163153523347471	40.9942212955069	149.468756346566	46.4972001620662	55.785656384378	21.5972603502434
Male	Non-Hispanic White	226	14204001	2016000812330	W	N	14	47	50511417	FMMF	NA	1	42	153	176	176	14	153	5.14229379322971	4.14489911664827	0.393418936751722	0.00280876786918584	93.5333496455238	171.589082133462	3.92439633294376	6.08509154333108	0.221860814244556	1.20002445640535	1.62317991490801	0.778299560201412	5.8954872739221	8.12210041658791	3.92439633294376	0.469407462987865	22.633192962877	3.92439633294376	2.38646721364262	10.6676152332422	0.501126546627219	22.8338184296903	79.6630866159203	183.554145381695	401.77845423666	0.764232386182168	58.6777444509693	302.762189257164	62.3222478854036	101.060609974851	39.418447311554
Female	Non-Hispanic Black	191	13701000	2016000552675	B	N	4	50	31334108	FMFFM	15	1	37	154	52	52	4	154	4.66683442317636	2.90185017073612	-0.155476141805826	0.0742805207993754	15.5860148613972	114.561860556963	1.11476717039003	1.2511689897936	0.0665407978564947	0.228637166826139	0.0900971621093307	0.248436863561632	0.766299845317664	2.50592499362348	0.921886233420357	0.0163247095472625	2.11747130103221	2.50594605749633	0.475484853527558	2.50594605749633	0.0957617754496256	16.9066611985085	24.5174552898426	29.3660268130118	285.319793790779	0.0525673068914493	13.0282022624007	43.6554562654614	14.1174435396246	15.816151889716	6.57580833681426
Male	Non-Hispanic White	202	13501200	2014000243905	W	N	5	20	381441155	MFFMM	NA	1	35	155	63	63	5	155	4.72125924038379	2.99537156375719	-0.142400253996478	-0.0407230570114767	17.3392255852937	107.827872586665	2.55170221729199	1.39343235407485	0.0369028079974397	0.166778455754202	0.114229778781307	0.186868763029559	0.373965897022594	2.55170620722033	0.939944786969016	0.0316894501252846	2.55868221934932	2.55170620880509	0.467087025637984	2.55170620880509	0.0978191387818532	18.4711318510791	14.6816203152879	32.9767269908862	283.574831584471	0.129766642132719	11.5390430072222	50.8210719795046	10.2160696301332	17.7780310813102	6.65493594923849
Male	Mexican American	274	14803802	2014000862771	O	M	19	62	19565016	MMFM	NA	1	48	156	233	233	19	156	5.13880407563391	4.3197555346392	-0.144057659637715	0.0278462407523734	65.0852451810629	175.326564250196	2.42605451778228	3.68469469266088	0.139116201853474	0.982616079832122	0.802884855642391	0.666955771250737	5.36189866347501	6.59114807184751	2.42605451778228	0.271085679247047	21.2076238113153	2.42776663263227	1.45446676537955	6.59469991052958	0.20080789574952	25.827610304712	52.6399570042973	118.332193712372	408.324272514545	0.496713048896905	39.4099473412173	194.893848571685	38.554871437467	63.493454577816	24.7654236513519
Female	Non-Hispanic White	264	15311604	2015001032244	W	N	8	23	440840	FFFM	NA	2	53	157	96	96	8	157	4.85101740101576	3.3299072015475	0.336012159880055	0.0275959962568215	39.0920593788763	131.448270930782	2.00762148078246	2.85672798713424	0.157343016727681	0.401080278369862	0.261820127638297	0.536785672878816	2.50866630486356	5.43110869016369	2.00762149270066	0.121834946328097	4.86537419132299	5.457280989635	1.06526722537956	5.457280989635	0.259967772061028	18.4718276094601	52.5041126178177	81.7630813282713	316.313710112174	0.115278401625701	33.1663698150566	101.413452207956	30.3352871216772	40.2808071383327	15.8759549771799
Female	Non-Hispanic White	106	10800811	2017001176675	W	N	17	14	1865571715	FMFFM	NA	0	08	158	214	214	17	158	5.10098820454981	4.15522723670316	0.410721947671038	-0.0262893150689187	96.1538184172524	159.924029921032	4.05363702673687	5.09284327387057	0.37781955327539	1.16810855350582	1.18437239299807	1.35944698099696	4.64278595114734	6.94846717941817	4.05363702673607	0.711803702891096	26.418372729688	4.05363702673607	2.20745993466223	11.0189278689444	0.489546294792328	22.7203819145776	133.721485672644	193.94464420149	366.42673388889	0.283494349619758	75.5316437805045	259.836972565221	76.5815225226614	100.865566249075	37.1340244019492
Male	Non-Hispanic Black	151	12400507	2015000191950	B	N	21	8	57212619	FMMM	30	1	24	159	258	258	21	159	5.1702182057224	4.37571668705697	0.350917121070076	0.0386950316199288	112.914828917846	182.895186491176	3.88569730704433	5.1306595465833	0.205491325436147	1.27410987630315	1.26920303140199	1.11714052558953	7.22659590680522	10.5624174818413	3.88569730704433	0.389154111795581	36.274650726257	3.88569730704433	2.26706565560058	10.5624203805873	0.471747328849552	28.0590902984502	73.4514260143174	191.770221565464	421.474313552401	0.815025322841176	69.5421670940978	329.708252253708	62.7742859620119	100.328584903941	40.943040128973
Male	Non-Hispanic White	264	15501300	2016000734431	W	N	18	17	205304818	MMMFM	45	2	55	160	225	225	18	160	5.18157996796635	4.35612901882359	0.0283521106025982	0.00343357761493196	80.1966007592483	178.575868687387	3.00927017723727	4.09240182724845	0.163914470092059	1.16555450171995	1.30800719228599	0.766377662889863	4.77791868409549	8.11607597058532	3.00927017723727	0.280281494406722	25.7100911992867	3.00927017723727	1.77637535783018	8.18004443676157	0.479815021008325	25.6498506401558	59.7974002616162	149.013003876439	413.986790454058	0.621239406245876	49.529104219046	259.543929248146	49.1523117246527	83.8133398596498	31.1449525570892
Female	Mexican American	250	14203800	2017000061279	W	M	11	36	1143736	FMFF	NA	3	42	161	143	143	11	161	5.01759161069679	3.90506034589103	0.0142469880054801	0.0432791292214225	50.3655461862982	157.727796435625	2.58809337880293	3.46966705094553	0.239203180556023	0.873325604710695	0.552000801514828	0.739241821963923	3.81207718139447	6.11713847694086	2.58809337880293	0.218320719383404	8.92366922894303	2.58809337895509	1.55224684337429	7.03516719682999	0.35462994396323	18.4604826080865	75.5734653817436	112.875605838994	362.646119603157	0.169447111444031	43.3172632043925	140.084471180701	46.6589544024692	57.9215341468702	23.4640505248376
Male	Non-Hispanic White	59	10605303	2014001247861	W	N	21	14	1619214757	FFMFM	NA	2	06	162	261	261	21	162	5.19194062814229	4.36695733363109	-0.213272773805274	-0.0535585515636309	63.6681577859389	170.439786600212	2.33160301882318	3.38405148740574	0.122297563697788	0.559429731288298	0.957026253942307	0.628773851535035	5.50253419692143	6.33792794519	2.33160301882318	0.228931506331019	21.1365194285821	2.36581168988907	1.60051328030958	6.33795411709938	0.534480839137087	26.3066029130781	44.2940215085053	112.95172327869	399.758439904688	0.435273993154486	36.9805708455865	163.847924119752	39.017256949554	60.808702217638	23.3019496320454
Male	Non-Hispanic White	53	10604702	2014000615191	W	N	12	64	532118127	MFMFMF	NA	1	06	163	145	145	12	163	5.03697889613973	3.85489960515278	-0.000677925139180302	0.0189805323846726	47.1918722661915	156.955045275949	2.2127909601769	3.09897397464834	0.103171607124641	0.370693207612143	0.432910913580857	0.671004278637024	2.41912291738808	5.59908122181065	2.21279095995182	0.141244361521012	9.10009237758172	6.01498945635297	1.26222920213602	6.0149894566149	0.416986239413276	20.3268551437066	41.1789697907226	104.132064901524	375.794885933607	0.394259227111738	32.2262268080105	166.61045187506	32.9819856729644	58.5340626194632	20.7888881597483
Male	Non-Hispanic White	154	12503400	2014000987139	W	N	0	31	02930	MMF	NA	2	25	164	9	9	0	164	4.26774843855818	2.16137735729889	0.0446264427668723	-0.0467274131142163	9.07936085816494	68.1029836822071	1.51853145344444	0.225510411421952	0.0149895262691651	0.101841528285209	0.00967980180621657	0.0769172016363017	0.194873857831183	1.51853145344444	1.5176657156081	0.00751462394048694	0.397015905519655	1.51853145344444	0.187023042195158	1.51853145344444	0.0338164973233292	16.2527167802752	5.99248396693343	12.896082358093	200.906510124645	0.0584789922098566	4.38350144784919	21.8255116908293	4.34737680403513	7.1371356384669	2.80584275360969
Male	Non-Hispanic White	228	14800400	2016001082215	W	N	5	14	2225250	FMMMF	NA	5	48	165	61	61	5	165	4.70929270671752	2.9735057668607	-0.188237002909833	-0.0261025167969367	16.2041723889602	108.114428559107	0.949538127686977	1.47689486119134	0.0346634776500412	0.18032966011576	0.101172052470137	0.235616872643694	0.639920200005141	2.58103702702346	0.949510459456945	0.0285941557600142	2.62058694403539	2.58103702703762	0.404743244939059	2.58103702703762	0.116347787143637	17.0658176882816	12.9305739274896	31.7101000270309	284.139850829669	0.131043652396032	10.1378568842058	50.011973504753	11.1343315206813	18.442986839479	6.74484400559805
Female	Non-Hispanic White	188	13703200	2018HU0321891	W	N	20	28	59562019	FMFM	15	2	37	166	250	250	20	166	5.1064302743896	4.17513609739919	-0.088948351322172	0.0449985280518859	59.5125816248049	172.678036942474	2.56144826424988	3.57526817791118	0.238945863371245	0.749274637876478	0.599185629342334	0.637715732868754	3.02076580542357	6.96266559357271	2.56144826424988	0.382623054489629	16.7901118253142	2.56144826424988	1.82426844214726	6.96273827124836	0.358620785757021	22.2339580913742	79.2027986579843	125.959242785524	388.132209815447	0.190168879953143	50.389494179822	175.927139500788	49.6991049732942	62.6073453137708	24.8545143782811
Male	Other	196	13603805	2014000529052	A	N	15	44	5615	FM	NA	2	36	167	184	184	15	167	5.14690261137819	4.11115137986665	0.00870427967056094	0.0498034433986054	61.5503574161479	180.676123369773	2.64387420069727	3.98879160748823	0.144522574937236	0.87511742565819	0.745026456130201	0.491839767182685	4.65584319954618	5.01250325310114	2.64387420069727	0.242159246554189	17.7916682030306	2.99836040753349	1.59356770990446	7.18679519647811	0.24416387174656	22.2803653819513	53.85690051401	116.193537026719	417.633163571143	0.554776522880999	47.6239208892858	198.643736449846	44.5836490595928	73.0089389504825	27.6042386630332
Female	Non-Hispanic White	48	10608303	2014001065200	W	N	5	26	445046	FFFM	15	2	06	168	64	64	5	168	4.70783252201682	2.97350014505145	-0.179027957525098	-0.0140225157894162	16.3539946323984	109.2687021691	2.47430672679446	1.29878107418349	0.0619509158435271	0.170024491446809	0.096472428365047	0.204732236095291	0.427981036582953	2.48015835790924	0.912399281290494	0.037443775528509	2.10590671040969	2.48015835794385	0.320533806001622	2.48015835794385	0.101682555576395	17.924164515374	21.2462795392699	31.3739148329028	275.374484015526	0.0493907354827397	13.4243744571789	44.9076887609124	12.7669932909339	17.110073620293	6.28128695988405
Female	Non-Hispanic White	273	15311104	2014001122066	W	N	18	11	281818297371	MMFFMF	40	2	53	169	227	227	18	169	5.09918384733971	4.16642175410399	-0.246616098841712	0.0228616942108807	50.3906506685918	167.678011397067	2.23578597501398	2.89325755970679	0.22232334034421	0.303665701812238	0.683592948290388	0.692869123013012	3.72199973805305	4.79654608486234	2.23492168788353	0.276308588539243	14.8353409230831	2.23493614238802	1.38653672534109	6.07514701220263	0.269397002021964	21.5469424462526	73.3199054282122	105.190161628845	379.672326810657	0.177218819710731	44.0032178116765	147.175169251307	41.2422567624884	58.2978696047529	21.2134479369585
Male	Non-Hispanic White	191	13900200	2014000415545	W	N	12	19	1216154648	MMMMF	20	3	39	170	146	146	12	170	5.04066654794028	3.86470518550907	0.604480489757439	0.0626474291345122	87.2856152295974	164.566373816937	3.78601826733503	5.47519119619209	0.19586750024542	1.04567355241849	1.71512005459814	1.07131214915083	7.72612122094089	10.09636435202	3.78601826733503	0.37392151932747	15.3657098818699	3.78601826733503	2.57012576350614	10.2914646583007	0.682818426150064	22.0547263817186	71.0902109141406	182.927125366705	389.381424849097	0.712737219448103	57.680892050791	258.173925275749	57.4553199257015	95.2033218823667	36.8551296859906
Female	Non-Hispanic White	228	14702700	2017001275105	W	N	13	65	1313424415812	FFFMFMM	15	2	47	171	164	164	13	171	5.07485325712623	4.03110151403789	0.224038731589087	0.0714442510219238	70.4666991418679	171.794244555544	3.13752397403416	4.22027192919343	0.29328626382542	0.828751874158076	1.16414406186148	1.02257462089999	4.61632496310155	8.51375232252191	3.13752397403416	0.333035057134576	15.5839741487219	3.13752397403702	1.81889523462481	8.52867440497164	0.601643342066403	21.4593340879762	94.462688591542	146.341468608837	386.641364946937	0.266850336149107	61.4410192147918	208.546945406732	61.1237204774295	85.8639307173367	30.3274137968577
Male	Other	276	15400100	2016001227969	A	N	7	29	72246292052	MMFFMM	60	2	54	172	86	86	7	172	4.8107131019433	3.21372189767521	-0.192473808839902	-0.00171812250456916	20.5168826031132	122.60833168092	1.09955888397863	1.69131113693944	0.0445642477241743	0.259285860521304	0.177778056094849	0.287362887224165	0.58391214962119	2.98695698599106	1.09884009472908	0.0463808635002247	3.1203254400723	2.9869570070501	0.541104729106321	2.9869570070501	0.113240576772237	17.3675320825097	16.6940454816229	40.5747661170237	312.254993725495	0.160822334142754	13.5154195553374	62.6171257247801	12.791484230845	21.5130902995649	8.57795751465073
Male	Mexican American	274	14804503	2016001136809	W	M	0	13	351034	FMMM	NA	2	48	173	5	5	0	173	4.17449898076541	1.99956931109761	-0.0813046214908038	-0.0246405822395446	6.80913225321294	63.4250185860977	1.16886080611455	0.177465108830973	0.0118018025462165	0.0810645583736611	0.0276885503713825	0.0768836807455755	0.121714488662556	1.1688608060969	1.14910503579826	0.00658626200642936	0.210523749242082	1.16886080611455	0.118408870573072	1.16886080611455	0.014834403537448	15.835196436272	3.88538661881842	9.95588854547829	190.464858152416	0.0432235711158491	3.37733593077179	15.353102852656	3.21799421013426	5.17723399758416	2.04749655927629
Male	Non-Hispanic White	11	10400108	2015000629890	W	N	20	59	65206615	FMMF	NA	3	04	174	241	241	20	174	5.17745272545111	4.3251608002481	-0.226587421199237	-0.0840443789999788	60.2542662533931	162.944287263396	2.27556091337955	3.17714344745616	0.116988719694779	0.557040105511941	0.501665406128527	0.413436941999186	4.85659392627627	6.18509185269415	2.27556091337955	0.40591761936847	20.5182223062668	2.27556091337955	1.53897826903127	6.18561584106692	0.251052266302879	25.4788632548212	44.6525355091888	112.51748778755	386.49934249657	0.466228585509831	36.0560041901183	180.884232613463	34.2050480745283	55.5812295592327	21.9875699208023
Male	Other	179	12602701	2016000272581	N	N	8	22	1371037388	FMMMFM	10	5	26	175	99	99	8	175	4.84831889131819	3.31579177608906	0.145699508343506	-0.0231966606242818	31.8644600733814	124.601697604397	1.682258379252	2.3678835296152	0.0733869480736827	0.441543248319965	0.218521086011548	0.346124619016966	1.16638889421872	4.57276636829471	1.6822594316728	0.0870319529259275	4.92213786722707	4.5728523029598	0.786369458856514	4.57285238309369	0.170425241179376	17.9414779953131	26.1398520856424	64.3171983824038	316.054788546687	0.274645969001092	20.4980529795969	103.076856743963	19.980611549884	36.9135503766769	13.2921454083846
Female	Other Hispanic	60	10608104	2017000010827	W	O	4	16	4146139	FFMFM	NA	2	06	176	48	48	4	176	4.63088437809898	2.8653581281556	-0.598769337199781	-0.065646185490138	9.64643860692647	96.0854781417165	1.47891738379122	0.782342993014514	0.0382275834219006	0.0827307784022293	0.0501745658937045	0.125356350545724	0.339033925800925	1.47891738379122	0.556371210422837	0.0134944387124854	1.23783657422566	1.47891738379122	0.204879431165438	1.47891738379122	0.0536523784229346	17.7303607773778	11.4916647077434	16.542378402325	250.0605456535	0.0263174598284754	6.98055522885856	22.4671721877785	6.77840461515844	9.41755771855133	3.40121914600116
Male	Non-Hispanic White	83	11210102	2017000205704	W	N	17	19	172119304346	MFFMMF	NA	2	12	177	206	206	17	177	5.1765786244129	4.34066475369933	-0.156719248636693	-0.0244769652895366	65.6242639640271	172.794263611006	2.5749581243657	3.92623248005565	0.148702707532893	0.916443179292479	0.565092188946366	0.512264202670333	4.17582157860425	6.74707244065838	2.5749581243657	0.205206197216533	21.4256182193747	2.57495812444718	1.44866012078286	6.99946187850619	0.311808885306687	24.4855655099993	49.3619705252047	124.527170209291	403.893064606884	0.556923554031884	43.7682362067053	193.823767047941	41.0429533845678	71.6283559189303	26.0001932021115
Male	Non-Hispanic White	156	12902400	2016001499889	W	N	14	50	35796914	MMFM	NA	3	29	178	172	172	14	178	5.12958112232128	4.11483512911212	0.205234511010055	-0.0061542269635466	75.1938646196106	167.909794106593	3.26111647301085	4.7135125303478	0.18006837714982	0.750753075323774	1.20823144553139	0.783304822905015	3.39753551647219	8.65492641559503	3.26111647301085	0.422374723636967	18.8936975753898	3.26116745977542	2.07775896608575	8.86463363831799	0.67740097677019	22.057705924311	58.3829262806075	149.652569584633	395.299647483543	0.617521391806393	52.8006288370334	244.112182404953	54.1225505539574	81.8863140429626	32.2279548045992
Male	Non-Hispanic White	156	13200102	2015000993420	W	N	12	33	301225	FMM	NA	3	32	179	145	145	12	179	5.03697889613973	3.85489960515278	0.12269548471237	-0.0231068891224399	53.3884852058688	150.486293509851	2.42949321672521	3.51775546190229	0.119957344191111	0.747203545390592	0.520845863444407	0.700031529497297	3.05189365737884	6.41054594083839	2.42949321672522	0.156014116438586	9.98306511585809	6.60404726338865	1.31339142649334	6.60404726150997	0.274979784393456	20.9751530229965	49.6041230831528	100.303774128565	364.117971362189	0.457098631795617	37.9610536830184	146.85158210437	35.2798372135692	52.9761547255338	22.1155535378046
Male	Non-Hispanic White	228	14800600	2014000820955	W	N	2	13	262124	MMFF	NA	2	48	180	32	32	2	180	4.53966955728745	2.6743482289058	-0.184297035735012	0.00613297880692032	12.0618935912181	94.2360246816966	1.78386255690664	0.831861082105477	0.0221828127234009	0.145762729614146	0.0493713863308149	0.113015685429212	0.248268954784906	1.78386562522085	0.98554318848525	0.0206676340982228	1.81300059285546	1.7838656985312	0.294930591123241	1.7838656985312	0.0297967320555361	18.3800978923534	7.97729451831081	19.912648115306	256.319780899115	0.0853480272730173	7.02548941184588	32.433157550013	6.93886679229723	10.975476428928	4.20523048984371
Male	Non-Hispanic White	60	10800700	2018HU0984607	W	N	21	50	442115651748	FMMFMM	40	1	08	181	254	254	21	181	5.17802300480457	4.33989408498093	-0.113243487988296	0.0247536949143466	68.4874554919124	181.776279915509	2.61691910914248	3.48383609805923	0.151568814749298	1.08577575749384	0.408175786566513	0.914594787402337	3.14014825394739	7.11328600233984	2.61691910914248	0.290944605343921	23.7304341302174	2.61691910914248	1.77653878724908	7.11352366072082	0.387324213626276	25.1710250242907	57.108837646457	131.432862419865	419.53897583407	0.5383029455384	47.4987664878364	195.724094746409	42.4974128865553	75.0219517494957	27.447489072256
Female	Non-Hispanic White	202	13401800	2017000771377	W	N	8	28	4683917	MFFF	NA	3	34	182	97	97	8	182	4.85566628254475	3.3439114329175	-0.0548367884666791	0.00145165009098393	26.8180359520572	128.65288100852	1.48842842160979	2.04839520794357	0.120181071982154	0.123779657691112	0.284955360211069	0.393709981254658	0.756767330551696	4.04257504592845	1.48843591397089	0.0806507169362679	3.64947429068326	4.04596717792683	0.710318133868957	4.04596717792684	0.173842827436038	17.0176398685869	36.8667192726637	59.1955938900711	311.255113380263	0.0927389505499928	24.4717307331317	85.5564549185997	22.0898593775766	29.9321633988157	11.5820217711967
Male	Non-Hispanic White	84	11304006	2018HU0886666	W	N	2	154	412175124464	FMMMFMM	NA	2	13	183	30	30	2	183	4.52632821611614	2.65109677299405	0.193600407261197	-0.0289598665359714	17.1963504859301	89.7805491164837	2.51583747136875	1.32130931677591	0.0330814316997136	0.170632240328936	0.11525744128993	0.217026980144421	0.517662738529688	2.51638952569348	0.987967531139497	0.0324379482782847	2.56288587952068	2.51638952570662	0.34817008738244	2.51638952570662	0.0767131368981649	18.57602988893	12.3240051417987	28.2328811388127	247.175885238193	0.10214801112015	9.32130724063843	42.169490498474	8.56312758012364	15.5312517411787	5.72044077722848
Male	Other	166	12400400	2015000620350	O	N	19	85	9194844	MMMF	7	1	24	184	230	230	19	184	5.17640631580314	4.41584192570864	-0.221712796171249	-0.00956246341050102	66.2959712269222	175.360499536993	2.48340303124191	3.51487495457476	0.132144826460995	0.707232043357386	0.82677368461762	0.655704416636454	4.37472724631234	6.7505868140986	2.48340303122215	0.328596446409203	22.6146228734805	2.48340303122215	1.64500114852765	6.75058930323137	0.323443396877466	25.6956150062747	47.7725114502639	112.770268554235	408.383545903018	0.538363735254627	41.6686049174509	201.228009044325	42.8744141152785	66.250331777464	25.3545233949201
Female	Non-Hispanic White	90	11305002	2014001435360	W	N	5	20	528	FF	75	2	13	185	64	64	5	185	4.70783252201682	2.97350014505145	0.16185875501495	-0.0743773440059798	22.9968879457167	102.868881075507	1.32943271152504	1.88877336474783	0.0882172872491765	0.0791838100601261	0.171927331500013	0.301397180852557	0.501540703315343	3.61376215321113	1.32942887066585	0.0482062450219849	3.01648016355785	3.61376215348751	0.504782659361722	3.61376215348751	0.129733615564992	16.298209021674	31.5456139102503	41.3743933420072	263.187264258883	0.0673986098426708	17.5539375494916	61.2584715584402	15.9074246394176	22.6879837975895	8.74721823268256
Female	Other	228	14800501	2015001186494	N	N	1	46	11173437	MFMFM	NA	6	48	186	13	13	1	186	4.33474595661249	2.27062331433808	-0.183510769734423	-0.0185755861250185	8.0616040035496	74.9012343594973	1.31466049026896	0.506739282393411	0.0263774861130306	0.0631730239408667	0.0198784778428455	0.092621515170151	0.141848092812157	1.31466049023762	1.23843011126961	0.00758705140734373	0.323505318062384	1.31466049026896	0.162095974426255	1.31466049026896	0.0374580444750316	16.6687230910837	8.97965316510091	12.5266458911501	207.452459912055	0.0200543198685923	4.58271077572066	17.2477120505558	4.70704153166734	6.25003560561472	2.50828988554591
Female	Non-Hispanic White	214	13603701	2017000753795	W	N	8	32	2080420063413	FFFFMFFFFM	5	2	36	187	102	102	8	187	4.88031214312779	3.41492444176609	0.393421137582453	0.0103864417832238	45.075802804581	133.046485861596	2.34933631167167	3.39066981006803	0.177436466323309	0.635286742935058	0.245234951013998	0.594445250853329	2.13653171924936	6.04552095065166	2.3317733689349	0.247413805177011	5.65286333540901	6.33840567482913	1.06490409887374	6.33840567482913	0.255806312126087	18.3311602243255	64.1189146490086	89.0773846208432	319.193775598681	0.136545381548836	34.2812510405052	119.696181342835	33.6992178441115	46.2787048442477	18.6071548711685
Female	Mexican American	119	11703413	2016000395136	O	M	21	51	02045254621	MFFMMF	40	3	17	188	263	263	21	188	5.06531583990523	4.20794776174477	0.0639816707740965	-0.0253432729497893	71.6597650015956	154.46577750121	3.05806702618666	4.11522754159162	0.268302957922355	0.781377313453105	0.762187531501089	0.647480044706168	3.69221292803512	8.31228913791534	3.05806702618666	0.264646819590408	20.2450086550303	3.05806702618666	1.30116271302844	8.31268802333518	0.425316101323666	22.4330262835847	87.6480003366516	138.199337615432	357.006451096508	0.194423903694714	50.7846224471278	198.804659087094	53.869538543565	67.6859541341014	27.2937414058537
Female	Other	60	10608900	2014000696324	A	N	11	71	332321190	MFMFFF	35	3	06	189	136	136	11	189	5.0081485231553	3.81506084030668	0.497226649618245	0.0390535977362649	74.6109657164202	155.586542605295	3.69440449572568	4.68185664430036	0.345128105081179	0.951767913155955	0.885322980732838	0.968708554559752	3.65933181449992	9.8683734699351	3.69440449583475	0.269176711801141	12.6967105184132	3.6944045067762	1.99887556539899	10.0424326077085	0.510437739631468	19.1956677463832	105.965234258233	168.346461704943	358.947456612903	0.249445059254199	69.6400631211105	226.697211826341	64.1447523436014	93.5683299309979	33.1524274360002
Female	Non-Hispanic White	47	10606514	2018HU0255674	W	N	7	30	4371044	FFMM	NA	1	06	190	84	84	7	190	4.79888825793047	3.17612572242507	0.722768608991243	-0.041656729451256	49.3478565557921	116.423165111144	2.5598010355519	3.80155585615458	0.166383912153153	0.48480395256784	0.335605012304427	0.644240861424091	1.70954345527972	6.95779955283939	2.55990009740153	0.179934395269787	6.05080287464485	6.95826063941137	1.2255679183157	6.9582606394097	0.258522684764155	18.2780047630352	64.268221814994	89.1618605241681	288.789506942655	0.14456060204494	35.7832925272869	118.953674845849	37.7003452407335	50.3956913800644	18.4810919732083
Female	Non-Hispanic White	156	13100500	2016001202087	W	N	8	30	4110418	FMMF	NA	5	31	191	97	97	8	191	4.85566628254475	3.3439114329175	-0.180777383094693	0.0509434143639235	23.6445832304473	135.180334332519	2.32231118456898	1.82711541521307	0.0997167262341695	0.275190300461593	0.20466514432461	0.353965432228928	0.150402717985269	3.48243614085471	1.28111668915388	0.0683666954338711	3.15803683726653	3.48243618884392	0.599713813066533	3.48243618884392	0.1518461244188	17.4562200709548	34.8433361395803	48.9196707586138	323.025639516275	0.0835889028190039	19.5072230891288	70.4400517676983	21.2937818235472	28.4860206480116	10.3458383637655
Male	Non-Hispanic White	94	10800900	2017001130665	W	N	12	13	18461650123742	FMMFMFMMF	NA	1	08	192	149	149	12	192	5.05145840881288	3.89484117738071	0.0954259469446089	0.0436932329783204	54.0693306679039	163.228595024266	2.57431331586502	3.8142287284218	0.145491721616102	0.659744653992327	0.736112773117947	0.554565087758926	3.97843272070119	6.87577498022568	2.57431331587576	0.320367221184535	10.5455408547829	3.38921796939114	1.34451195697361	6.99770910727103	0.442697242701135	20.0033993666135	51.7008147371741	114.164617140126	387.005009874412	0.509456236192942	42.1522978210379	200.467922800061	45.1680518449419	65.4660106868615	24.9068037556543
Male	Non-Hispanic White	276	15500102	2016001179411	W	N	10	73	42101540	FMMM	NA	2	55	193	128	128	10	193	4.97831277959673	3.69128728157942	-0.455356802244289	-0.0933875412496908	25.4300228844953	132.280575450131	2.31826660794629	1.86420096946975	0.0568540897614609	0.387115039921573	0.230325774269272	0.390464548504494	1.27598594197527	3.3697867983126	1.23980052693495	0.0575188466338772	3.95973858877396	3.37012724328123	0.651816937120923	3.37012724328123	0.165896103174546	19.5110810611249	19.9721859274248	48.1522843961229	330.553273120718	0.212345733805458	17.7596333883117	73.2887200979115	15.3977734616917	25.9663286766922	10.2455030548785
Male	Mexican American	271	14802513	2016001042446	W	M	18	25	7218	FM	NA	2	48	194	220	220	18	194	5.13374435831278	4.32055520384646	0.192841091549735	0.00853291607102579	91.2311408418236	171.104977967808	3.36375241654277	4.40882915623262	0.193391623007044	0.939076561205166	1.36467443032821	0.847678012116827	5.4578747733028	8.98688633206633	3.36375241654277	0.446207874346756	28.806886812591	3.36375241654277	2.02765484731906	9.14362618694196	0.730032954074689	26.1218358382006	66.2445736312388	161.750728972517	400.92800109823	0.655411302089316	53.9050584174378	246.390867358406	54.4331999023929	89.0308009302883	33.7155633138458
Female	Non-Hispanic White	40	10603719	2014000754766	W	N	17	19	5817	FF	NA	1	06	195	214	214	17	195	5.10098820454981	4.15522723670316	-0.159842947096923	-0.0211725573359275	54.3467214916078	160.744419515324	2.41027186819331	3.13968773531529	0.242462046403381	0.70523066844242	0.513729515769832	0.665923012044777	3.05769978269044	6.27561659863847	2.4102718650833	0.319718222800841	15.5297079166836	2.4102718650833	1.26823023076849	6.55179821250204	0.279282518880117	21.5479632729022	69.4233304397092	113.21141974938	367.835623132339	0.189043089934194	43.3044438284188	155.041504822906	41.2548944689406	62.9918374821509	22.1645963352815
Male	Non-Hispanic White	263	15151120	2014000234782	W	N	1	20	153339379181	MMFMMFM	NA	2	51	196	20	20	1	196	4.43743194874075	2.49149450521504	0.18691878697141	-0.00155983966032692	14.5619693646995	84.425721229713	2.4173168302239	0.950535859985141	0.02740672392443	0.188553807305925	0.0470480309438704	0.129026544329849	0.422155318486998	2.41731682450499	1.04563355425761	0.0256928993464911	1.10881266682786	2.41731683023911	0.261627231913055	2.41731683023911	0.0775742135930216	16.3749890852018	10.7855211224943	22.7451563180677	236.034501898363	0.106422769872173	8.38144775548066	40.4616835865247	8.49646708856076	13.0477452720869	5.24752591860082
Male	Non-Hispanic White	154	12201700	2016000693642	W	N	4	37	47449	MMF	NA	1	22	197	57	57	4	197	4.68492105438614	2.92910244878954	0.136250365882453	0.0558888250708246	21.4420257140755	114.526917128374	2.76543493179387	1.52407215352833	0.0462122844464164	0.222599996750464	0.103314076366163	0.170147495620293	0.675212702681676	2.88547190177007	1.06180036439908	0.0371497063608204	2.95542656101791	2.88567485230303	0.480145009528201	2.88567485230303	0.0833148429261414	18.6999356992836	14.6866071609101	44.2508213705065	296.688069728277	0.157075737332844	12.8085797473592	61.6857587567175	12.1048836155332	21.6138591779854	7.87395637963112
Female	Non-Hispanic White	184	13602401	2015000212955	W	N	2	14	712231138	FFFFFF	NA	1	36	198	35	35	2	198	4.55762530298967	2.68401087559577	-0.557387486243654	-0.0293325986892566	8.38650099966619	92.600329901818	1.31354548859615	0.566737285677601	0.0287176699247972	0.0746202473275511	0.0179118889883071	0.104760026521706	0.304656558508296	1.31354548858379	0.486661545823397	0.0120711878602198	1.12394681364631	1.31354548859615	0.186896997992566	1.31354548859615	0.0348676325157666	17.3552217792703	9.68770649163437	14.0486327362724	243.226706001201	0.0234363911668249	6.3999519450734	19.2324703149611	5.90760776495737	7.52089744987238	2.93833901831929
Female	Non-Hispanic White	179	12603001	2014001168347	W	N	3	51	832929	MFMF	NA	2	26	199	42	42	3	199	4.60123528663073	2.76087326239129	-0.451214620177193	-0.0684186074012159	10.0709862586142	93.0202004986458	1.56890236056157	0.735682252619616	0.0354852635042659	0.0976796719804063	0.0617940935055003	0.124261052957673	0.294895867268458	1.56890237651257	0.577175290509418	0.0113814436764611	1.32385416262166	1.56890237655082	0.20170401887392	1.56890237655082	0.0582695607547361	17.4490008751446	12.786024403051	17.3669944886271	244.053371278029	0.0278196110941728	6.7774846527098	25.1931706099961	7.12685150051855	9.52374020072428	3.52148837359884
Male	Mexican American	226	14203003	2015000765146	W	M	1	22	29301	FMM	NA	1	42	200	21	21	1	200	4.44199988556187	2.5083141442163	-0.0411551628756644	-0.0354842154733843	11.7889067261623	81.9833083706622	1.91675093422694	0.798562996537145	0.0218223573827502	0.0910921236551532	0.034817812314529	0.0968737528619702	0.357067203205244	1.91676081384927	1.19916275262801	0.0129111131347465	0.76427228988352	1.91676122942008	0.272802219799749	1.91676122942008	0.0817865370316512	16.7186034646689	7.25574981190586	20.445572116524	230.89444535641	0.0835377645641985	6.80529648892217	31.4320504031815	6.54024526449057	9.75208421592295	4.07030570114308
Female	Non-Hispanic White	275	15151105	2014000117315	W	N	9	26	56914315310	MFMFFFM	45	1	51	201	108	108	9	201	4.90952763464651	3.49600555328432	0.0977730850466397	0.0255757932593164	36.3712503978009	139.087527319849	1.89947061244989	2.73358610995332	0.141856757811187	0.343365386471475	0.459110461425301	0.559988739661134	1.74088542287658	5.07468347403888	1.89947064730244	0.0969600920227147	4.95475481108515	5.16329644951452	0.765430001600986	5.16329644951452	0.228576669879272	18.1480985066541	54.3917663379145	77.6657693898239	330.003083259506	0.139095095927764	28.1709620020576	103.634208614412	33.6695274522971	38.1387345262785	15.6707789667322
Female	Non-Hispanic Black	166	12500502	2017001298389	B	N	7	123	43310742	MMMFF	NA	2	25	202	94	94	7	202	4.85434417959598	3.40000712167464	-0.0834925970264601	-0.00446067190633972	27.5641089098026	127.725509939604	1.49006376383241	1.91232119430178	0.122597925276381	0.336228336536417	0.121677935127267	0.410943320238003	1.51957334059406	4.0415654214346	1.48727986242407	0.0713841526205273	3.55706096111151	4.04267749346042	0.798245602676088	4.04267749346042	0.195879903825505	17.5340052078989	39.9252938126733	52.0652199618831	309.57087288636	0.0832374865495128	23.1170190309776	75.630541016634	23.7739532239363	29.64752900354	11.5099838742442
Female	Non-Hispanic White	119	11801002	2018HU1106699	W	N	10	21	10204641	FMMF	15	3	18	203	128	128	10	203	4.9807830518529	3.70391872117704	0.113160531256167	-0.0536258935960565	45.4712042705403	137.986679930633	2.2836864247958	3.17615031169573	0.197221031254159	0.513436471927297	0.240394948829784	0.617591874187824	2.12351598494732	6.16197782141027	2.28368642479579	0.146656428322609	6.61136452937344	6.20767440176693	1.23336192267146	6.20770331042099	0.302523279429895	18.9113169727509	63.9388702749225	90.7057647616686	328.042212054185	0.151632198404007	37.9131625567026	125.916129981101	34.7109693621357	45.4689911833992	18.7286386607031
Female	Non-Hispanic White	84	11303700	2018HU0635554	W	N	8	34	84344	FFM	30	3	13	204	96	96	8	204	4.85101740101576	3.3299072015475	-0.176568774354552	-0.0400874845458208	23.4141005196896	122.845800751984	3.21443222315236	1.64123328715453	0.0888473551468307	0.192437912177311	0.165941757323602	0.252054201373489	0.814882010765432	3.22937430383396	1.18899753085146	0.0547399250241824	2.89758374914153	3.23202525879208	0.594578326442554	3.23202525879208	0.117307908835789	18.6921680247615	29.4393804593877	40.9921584540849	300.657536357226	0.0685298047346428	18.5138280036344	56.3893707226213	18.9913464913755	24.3743466457785	8.93701254206976
Female	Non-Hispanic Black	131	11801002	2018HU0919361	B	N	5	25	121733540	FFMFF	30	3	18	205	67	67	5	205	4.74245624834775	3.07766112083772	0.13836676945799	0.0252096182959436	24.9289029236527	117.644323697421	1.39374553894693	1.77838322822136	0.105876806932963	0.342203458794907	0.231565668770178	0.258699763627333	0.9826654879084	3.78684557697667	1.3931104885475	0.0596412578944057	3.2040761233057	3.78684592745831	0.602056860336418	3.78684592745831	0.190993871760889	16.8945157594411	34.523357364766	50.1216406891407	291.05836867024	0.0738074786436787	19.8183541851986	73.7966632688968	20.9851979369644	28.5192935689238	10.1368554440543
Female	Non-Hispanic White	45	10609901	2016000876606	W	N	21	29	215051	FFM	NA	2	06	206	262	262	21	206	5.10766789526842	4.20887358444399	-0.0900500719081525	-0.0366916545254861	61.4868611736727	159.329795681795	2.65099660769128	3.60260796457134	0.240863385684363	0.321149294226669	0.949552538285749	0.901753982326654	2.72305296345043	7.2061202706458	2.65099660769128	0.27671092911269	17.6618520421223	2.65099660769128	1.77162803159832	7.20615590599374	0.360358796606976	22.1938664105726	80.4689330937069	119.598218751772	365.405102229619	0.205873610954934	50.1384799668227	157.048966731761	50.3512407176226	64.7812584447757	24.2171921610951
Female	Non-Hispanic White	150	13400800	2015001444352	W	N	15	17	491315	FMF	5	4	34	207	180	180	15	207	5.09627764385283	4.10482677234588	0.0675255479034353	0.00431017288086891	64.8678627648975	164.118350464382	2.74659227207819	3.90489278583696	0.257101050241396	0.861941321127792	0.667958038076694	0.639413494698341	4.96765196521405	7.43385458887455	2.74659227207819	0.265130899633748	16.8516364376347	2.74659286625763	1.8106002830955	7.46601186337618	0.381518537509492	22.6175800188266	81.3996072683979	123.798840805448	373.611052332574	0.212276898486488	52.6083778744935	187.13813697793	48.6861801888061	61.0369250734844	25.6539307274912
Male	Non-Hispanic White	192	14000702	2016001086852	W	N	11	20	17391142	MFMM	NA	2	40	208	142	142	11	208	5.02630225617892	3.82633536702083	-0.0634050503895719	-0.00213639389622329	43.0744630397555	152.043378086824	2.26874634200884	3.53466762630271	0.108708031360441	0.739900477887562	0.47462532324942	0.615471199836003	1.96212667308887	5.92947781005017	2.26874634328882	0.316218553975864	7.96584950519067	2.29105134394726	1.30176967582814	6.16709195486556	0.268189405460613	17.9860198305006	46.0060531123031	98.2806363173082	366.93998413937	0.431320676624475	33.97282548607	164.294269148401	32.6937733897651	56.4875235438553	20.8123436688245
Male	Non-Hispanic White	264	15310400	2018HU0787074	W	N	9	44	856519	FMFM	NA	3	53	209	113	113	9	209	4.92165104454335	3.51159179373308	-0.111506133008327	-0.0409756776244036	29.9666669038614	131.719592908217	1.55448014208412	2.35929302983018	0.0696641090407226	0.293190582533069	0.436121179559372	0.425476063932434	1.10170716235766	4.22541816021589	1.55448014208412	0.092966740821188	4.63265668069738	4.22551512292771	0.891525989332702	4.22551512292771	0.134656296689324	18.2775240553324	23.7516553611683	59.2077731388287	329.501343789792	0.238093745993525	19.3932467768866	95.8945992061475	21.1084009259323	33.3638138472399	12.8050823927816
Male	Non-Hispanic White	94	11201105	2017000326063	W	N	19	32	19605517	MMFF	40	1	12	210	237	237	19	210	5.18471229774959	4.32991977017485	-0.0308242394106569	-0.00473414748664646	73.6331646400189	177.678928713078	2.71921928351461	3.63532828180041	0.152174059744879	0.870854451118362	1.08997412738814	0.595799317479473	5.17048778013306	7.39158514883965	2.71921928351461	0.497226702368336	24.4648930930857	2.71921928351461	1.88957691927076	7.39160436551868	0.196221363031795	26.0787887855986	58.1695739900028	143.105122664675	412.426298583909	0.528416093359159	47.0957216569643	211.79056908279	45.6887733119845	77.8123693085867	28.036938603448
Male	Non-Hispanic White	153	13200410	2018HU1029552	W	N	21	13	211920	MMM	10	3	32	211	260	260	21	211	5.1908201119554	4.36319161632911	0.741949272869995	-0.00742336426279883	160	178.287380876009	5.1170275256477	7.22666730186057	0.29701410878526	1.82694830089375	2.35616631040153	1.53209305435582	9.03122753422684	13.9094824819652	5.1170275256477	0.47224330538556	46.7051806180903	5.1170275256477	3.1582044151338	13.9095229386924	0.627092534747465	30.2681530826332	110.141280247335	255.34586210045	413.485094966548	1.1468742401265	87.9712917984635	420.532132950665	89.4851128918451	149.116019865531	52.895365309722
Male	Non-Hispanic White	154	12500703	2016001440855	W	N	18	36	15185049	MMMF	NA	3	25	212	223	223	18	212	5.18035256196096	4.36093604830441	-0.147384114848518	-0.00989764536605023	67.5962111536942	175.994882268398	2.51407328470962	3.49248930609707	0.138132692755765	0.821790960543364	0.869252226489612	0.689429286635192	5.13360968863104	6.77084807582328	2.51407328470962	0.288930076747284	22.3800588918663	2.51407328470962	1.76017155758391	6.8339597252232	0.373979581832378	25.8871283764116	52.0844040548708	115.770782906965	409.491069380504	0.517407298550351	40.9619253201476	181.211895716751	46.945374494708	68.2961531933645	25.7372639464174
Male	Non-Hispanic Black	82	10900102	2018HU0896970	B	N	13	25	48615134710	FMFMMM	NA	0	09	213	157	157	13	213	5.08425704937609	4.03110404751947	-0.166592927761755	-0.00294018329089501	47.6799569450091	160.985913293513	2.20325347299682	3.24893902711026	0.119934889023704	0.605320694663604	0.691992384525233	0.751373666998056	3.95938282727018	5.92565430212215	2.20325347299682	0.180983714322261	10.7096969646666	2.20325349630695	1.31165697942041	5.98906387913654	0.435545256073002	20.6407043172174	41.243174359971	107.326855682539	383.010175448511	0.465914972977242	35.193455572422	161.35575922973	35.0607188251286	51.2924788274461	21.0967124812513
Female	Mexican American	191	13604001	2014001059622	O	M	1	18	34315410	MFMFFM	30	2	36	214	14	14	1	214	4.34043229393823	2.3202904310203	0.125141602072885	-0.00266216203019784	11.5355322541066	76.5366822091385	1.86723137257583	0.766492193831291	0.0350327871236749	0.072451897602832	0.0529656728447239	0.119370604079823	0.326506108488147	1.89983812223531	1.20443300721446	0.013915886289836	0.662586096687028	1.89983813631097	0.286043967445257	1.89983813631097	0.0500594645760646	16.5049996147718	11.9296504349861	16.3785905094911	210.840521543357	0.0299809926412452	6.95861317563368	25.0916821463189	7.27627404723294	9.99052309338238	3.68397105953172
Female	Non-Hispanic White	119	11802302	2017000137622	W	N	11	14	45114416	MFFF	NA	3	18	215	141	141	11	215	5.03059133695386	3.84935399697692	0.0493369297976052	0.0674537277575247	49.3378199934829	163.701568308237	2.58861178205238	3.26205909230779	0.24255695738859	0.645072625861148	0.428804890333141	0.75846866228784	2.90376780485837	7.03547751005646	2.58861178206435	0.268825859121665	8.92017721768343	2.64252118077221	1.16160600321408	7.03657636687594	0.263396756164896	18.0595671145269	79.6476784515196	113.805639643575	372.899231098482	0.207201968007088	48.9729966834219	175.844960265822	50.3535807452687	66.2975362592348	24.1322835784951
Male	Non-Hispanic Black	192	13904107	2015000530636	B	N	14	28	1434555132	MMMFM	NA	1	39	216	170	170	14	216	5.13049834059102	4.13878405515195	0.151318489037359	-0.0144338053173697	72.9739511706375	166.678121313537	3.07097302792618	4.3578948064459	0.159506403147865	0.656685355734048	0.78030908445553	0.837850061091251	5.79690683974145	8.29066885040998	3.07097302792608	0.242683054367331	18.3017726634657	3.07097302792608	1.92778348319288	8.34777017749423	0.457479597433893	22.7624852146352	64.7781623468902	148.528283127997	393.1229089796	0.648086510837052	50.072898819614	232.992309867502	47.1229337343499	81.4325768285272	30.1817462534047
Female	Non-Hispanic Black	154	12500704	2014000958617	B	N	12	87	5112526	FFMF	NA	0	25	217	146	146	12	217	5.05600081765439	4.00270240477821	-0.182905070471999	0.0562605798468066	45.5949668488261	166.045425332123	2.08108557360597	2.73573114140395	0.207558860701152	0.786860063319532	0.560600509578556	0.670632306812448	2.58287501494186	5.65676088648484	2.08108557360597	0.0872661560093039	8.73895201458564	5.65697709820138	1.27584893811211	5.65697709819219	0.274979735947383	20.9092224880482	64.4968269565762	94.9161136115647	376.896447564993	0.160594084986445	37.2470198106122	133.053912656237	39.8299088604512	50.9014637038626	19.6088439942711
Female	Mexican American	118	11703208	2017000885065	O	M	8	108	839439	FMFF	20	1	17	218	97	97	8	218	4.85319715240764	3.39228166228907	-0.0501574217426294	0.00722895918341155	28.2791346316113	129.079192530618	1.6074851413875	2.08545762325485	0.130170943283262	0.339380561791772	0.248839824340661	0.305367847684038	0.752829353009098	4.27880003073295	1.57408267652077	0.0433602397859631	3.85463666346414	4.27880033605098	0.698333492277439	4.27880033605091	0.136551644687031	16.9654623747248	45.0489572662991	61.8544004960534	312.028337932408	0.098622573930478	24.5762354887542	95.0829828015253	24.0199914316991	33.665106085382	12.2789600329951
Female	Other Hispanic	184	13602401	2014001223178	W	O	12	9	40128	FFF	NA	2	36	219	147	147	12	219	5.03461407412917	3.9215453553515	0.359342501400567	-0.0363257766611683	72.3046076513811	148.159337218113	3.53503469134188	4.97037378797179	0.278377490630628	1.08435244903019	0.778572813875182	0.921768600512782	2.20518314500106	8.60271968212962	3.53503469134187	0.307544360809548	14.8179634810456	3.53503469134187	2.03363527713496	9.60922049878377	0.541590368688292	19.4537194015301	108.053287592683	142.375645016722	346.017949126077	0.238893648325445	56.6243422173955	213.745630924471	61.5203705043601	81.8471797036238	30.5796363496911
Male	Non-Hispanic White	118	11700900	2018HU0681684	W	N	15	42	17471549	MMMF	NA	2	17	220	180	180	15	220	5.15239156157904	4.17428739611969	-0.127908629084898	0.0204810292369577	57.1899833638639	176.420895331192	2.48351658564919	3.61541487511849	0.144782690278775	0.932083061348471	0.563443951355233	0.817243070474868	3.82994300292668	4.84152138375604	2.48351658564919	0.292000850772029	16.8201078508943	2.48351658565076	1.6661636505248	6.75089800544683	0.306797834113819	22.0278242127647	50.3914833457348	127.216965258117	410.234254971273	0.502683230055976	40.2998955155478	187.252753919901	40.337539223962	67.2497334768352	25.4705894055649
Female	Non-Hispanic White	132	12100500	2017001150683	W	N	13	82	50131541	MFMF	NA	1	21	221	160	160	13	221	5.06948199876825	4.01005346945133	-0.33261881746962	-0.0288619240931667	39.5448176192891	154.565827672696	1.7792595644518	2.70719007970038	0.155073321021523	0.294382909440272	0.353641013335322	0.448198699210845	2.07431381975377	4.83649290516802	1.77925956445176	0.189090848909293	8.87975845821611	4.83652894216118	1.07986319077508	4.83652894150055	0.209032532968638	21.2254348996355	55.4723186283204	80.2429224011262	357.179866525821	0.118510447443959	32.9444618188892	105.596009556008	30.5190616258246	39.1807020331778	15.8878923436418
Male	Non-Hispanic White	178	12501000	2015000397842	W	N	15	17	1215494715	MMMFM	NA	2	25	222	188	188	15	222	5.16489036411155	4.23739561925631	0.384668032914009	0.0410924422443053	101.703696772264	182.360009302295	3.88521410302077	5.37722404413948	0.229136207384912	1.44826348713504	1.60349256647099	1.50790090029433	7.49404262064029	9.2827944646788	3.88521410302077	0.451663473713417	26.8883073819353	3.88521410302077	2.42381231373473	10.5611061802488	0.323486779444629	25.1771151024057	85.0035496592006	190.431166505288	420.549004716173	0.817381179325213	66.4764124578121	325.803536141685	64.4401213087948	113.521303312603	40.8480731033656
Male	Non-Hispanic White	191	13703700	2014000303859	W	N	16	22	11153514361672	FMMFFMM	NA	2	37	223	194	194	16	223	5.17078052384386	4.28487068573387	-0.163437200113309	-0.0298117945220152	61.6475498317194	170.881225820623	2.51136395150791	3.8673188476237	0.129729814173376	0.990160626637632	0.603280501260597	0.806347786849618	4.07578630018999	5.62715063976435	2.51136395150791	0.27706945042315	19.1173655946689	2.51136395150791	1.80858534259091	6.82659492311163	0.196190784124046	23.5474375765823	54.9839908687664	123.408289061004	400.534719847607	0.517491861150076	36.6387833421617	188.368550709994	43.685662401296	70.2310543695903	25.147211418815
Male	Non-Hispanic White	120	11900200	2017001072632	W	N	13	15	4618461316	MMFMM	55	2	19	224	164	164	13	224	5.10341548646241	4.05271806113451	-0.156999922137093	-0.0280310070948867	49.1913669200665	160.033709811991	2.3553436171187	3.35103996113013	0.121597155082272	0.707460308891317	0.701632420198176	0.575538823871868	3.14627084986211	6.02133142533207	2.3553436171187	0.146952408174625	11.3102597459586	2.39401947593848	1.47255974945345	6.40248775418992	0.328645102278602	19.8850065708214	44.181388147792	107.384803632559	381.309837543604	0.45056352840531	34.7219248389256	170.828344574995	38.6104771167976	58.4210403055482	22.4528923000724
Female	Non-Hispanic White	155	12504302	2018HU0085156	W	N	7	72	8736238	FFFFM	13	2	25	225	90	90	7	225	4.82435112082127	3.24887516919787	-0.289483393058094	-0.07680512633686	19.2862378374134	115.300987803475	2.81388012311605	1.35344236395544	0.0779188031582339	0.300045066179834	0.112128155837255	0.243064517739393	0.854698340668702	2.81971855035837	1.0373804878266	0.0510224831916922	2.46838534044296	2.81989252925335	0.483690291471254	2.81989252925335	0.0907414146046775	18.5912864795103	28.0348060717111	38.5306762490342	286.699297491857	0.0605065811079089	13.0849635348362	47.7491315419918	13.8783837820523	18.1015492375933	7.43540642728147
Male	Non-Hispanic White	131	11703418	2015000352404	W	N	12	27	71449694212	MMMFFM	30	2	17	226	144	144	12	226	5.03332432500932	3.84522976327958	0.0223621393195593	0.00262601436610892	47.8270750413376	153.845728815185	2.37357079905387	3.20435399157624	0.114750601216853	0.526037739043326	0.407909131312774	0.826951202209154	3.59177048572699	6.38706638367232	2.37353792446735	0.226067095099944	9.61462562870866	2.44109311361927	1.30023839478037	6.45194500923799	0.278208925077972	19.1501204376461	47.3545309325004	105.019796183938	370.19750538116	0.410977075697747	31.941855990582	163.470965456799	35.0055428644847	60.624265029347	21.9669454641347
Female	Non-Hispanic White	130	11701900	2014000975105	W	N	12	17	8124138	MFFM	10	1	17	227	146	146	12	227	5.04851698650528	3.9056653247469	0.454490866516981	-0.0107245379053737	78.2693584584366	154.129390639198	3.79574211188297	5.0149019533705	0.323198686775246	0.934506669763445	0.84405488170914	1.04044930194008	3.40760941809096	7.91956739089568	3.79574211184374	0.464640094049152	16.0275320029802	3.79574375861508	2.26551385249168	10.3178968080867	0.56327320561725	19.62030458134	107.972284071738	159.204622656395	356.423190829798	0.270652343531257	64.9543142790686	228.309105184096	65.8070168077739	91.6586672683538	33.8222628767596
Male	Mexican American	215	13901000	2014000147673	W	M	16	14	461643	MMF	15	2	39	228	193	193	16	228	5.13824351390828	4.23524476098275	-0.21568408728365	0.00520946755108568	55.6766402405977	171.306265605532	2.25780010595521	3.34724166105923	0.119363908639363	0.73374769586345	0.683471064429475	0.615475859364252	1.92760521194629	5.07977614382203	2.25780010595521	0.206623686314414	17.2567503951373	5.32514572590406	1.09357179259957	6.13733700029761	0.468913737494589	23.6596853693571	45.1771096513992	110.644649540753	401.281687427894	0.497460377403562	39.9787316019968	170.790600577058	34.8670251782942	60.0025666255294	22.6503459098146
Female	Non-Hispanic White	224	14501500	2015000183178	W	N	20	115	2023	FM	NA	2	45	229	247	247	20	229	5.10741672475097	4.17413667780911	0.139985928959254	0.0019753781556244	74.7480112651491	165.569674951155	3.16942247369185	4.23672328656476	0.305758377906388	0.602195441565872	1.10912794787858	1.07612568524712	3.11264395117205	8.6153814206334	3.16942247369185	0.308016809225102	20.6601733700298	3.16942247369185	1.84545695887882	8.61538351690812	0.448657346297473	22.5841109494248	100.931194350247	130.97872521208	376.086249434286	0.226188356640793	62.6092251156529	195.112809784713	57.1036348574169	78.1160455529436	29.7994052750877
Male	Non-Hispanic Black	189	13903900	2016001446191	B	N	20	57	595920	MFM	NA	2	39	230	249	249	20	230	5.17171298573501	4.39397665459727	-0.124842365648683	-0.00626359731758418	71.4597453422623	175.116136055347	2.62035877131087	3.54529906593427	0.147073053412353	1.21918005303256	0.907169272456225	0.799168884986038	4.55044849975796	7.06336589738577	2.62035877131087	0.54785677424968	23.9928466911609	2.62035895176926	1.9482377398945	7.12287363209723	0.334032498540767	26.2709775946115	56.3437517479134	125.109913507945	407.956662062605	0.595584574278017	45.4222218727869	200.022989316913	38.6912672178189	72.4846608513935	26.7248204437613
Male	Non-Hispanic White	154	12500200	2014001149983	W	N	9	8	01495244124710	MMMMFMFMM	45	3	25	231	119	119	9	231	4.94567164115768	3.5851034617125	0.232428621941784	-0.0153906192341217	45.4917997142721	138.418405481357	2.18904144995168	3.39092737570622	0.0997166451067108	0.659157420055973	0.29773554023105	0.739826139356339	3.08519265114852	5.94785805808591	2.18904144995168	0.171249454895073	6.4512648762227	5.95043159514729	1.22593864191567	5.95043159514729	0.274523916648313	19.7816072716558	37.0437210729542	95.5324315576642	341.991086363107	0.378815073675937	31.2668887697933	156.602751594221	29.6810893070687	47.4863302229396	18.7158165890711
Female	Other Hispanic	47	10605302	2018HU1286975	W	O	20	83	452010541	MFFMF	10	1	06	232	242	242	20	232	5.079185856907	4.17639733040901	-0.00375636128470019	0.0226062518662418	64.8865895031036	164.316115947185	2.77640740519427	3.42390930613943	0.262203313223583	0.828150770718014	0.738266521467982	0.809773744427031	3.18740682688895	7.54705478757158	2.7764074051917	0.417971272599436	18.5494971598477	2.77649601092512	1.6677237256127	7.54705779793166	0.334730493252366	22.3707017859734	92.8345229143697	136.051029290437	373.948657387434	0.205942678781883	51.5127832543485	181.547967549428	52.9423416132812	66.5208029697716	25.9558455382991
Male	Non-Hispanic White	166	12102800	2017000900663	W	N	10	20	10343877	MMFFF	NA	2	21	233	130	130	10	233	4.98640657216088	3.71285788105294	-0.380495271323342	-0.0518822608534758	28.0044271374781	139.007002742954	1.44214433632	2.13018308369685	0.0766363184055994	0.455062939586847	0.237882533207448	0.307287059424192	1.20901242910339	3.92007582437336	1.44214433631642	0.0594432726578261	4.65762241566323	3.9201547080631	0.73163958926378	3.92015474342399	0.154677158183506	18.4186021469786	23.9835148804578	60.145724674312	343.081195420717	0.250968173960763	18.0121250264806	93.1395999738299	19.9294905987348	31.7017037453642	12.3693150718161
Female	Mexican American	251	14600300	2018HU0578122	W	M	11	17	5838111440	MFFFMM	NA	3	46	234	143	143	11	234	5.01759161069679	3.90506034589103	-0.141225199547268	0.0844116447222875	43.1134557319771	164.350814407027	2.19221104488669	3.07796775347512	0.192915109178662	0.426646362624137	0.454387044693848	0.482887542660268	2.56870313515896	5.71334211302073	2.12246723451746	0.157500242031	7.23531087328739	4.54053926196041	1.44047079919189	5.76946411406769	0.315351699948957	19.3128957802016	66.7675613685581	94.4618891548657	374.007880580143	0.14941531158514	37.4805037723156	135.362997571364	36.5740363249461	47.8074737326005	19.8454867995658
Female	Other Hispanic	191	13901801	2017000493700	W	O	14	26	14511651	FMFF	20	2	39	235	174	174	14	235	5.06493058161773	4.06964856218148	0.127979393659294	0.00693468702485644	66.5283355790671	159.471507298858	2.92068831228881	3.96412424525929	0.26117669496916	0.931756806648734	0.996360457055011	0.695739622617977	3.74831330254542	7.65901900389685	2.92068831228881	0.331015678609267	16.5836655243635	2.92068831228881	2.22531753364224	7.93925396588738	0.377338482812039	21.7783071884627	83.2997700310597	127.681159322696	365.648824972125	0.204964443858068	56.4831310413842	166.954355068256	57.2121541428777	71.9459732476777	26.6986562374556
Female	Non-Hispanic White	58	10603716	2014001242593	W	N	6	15	312936	MFMF	NA	1	06	236	77	77	6	236	4.76909992622241	3.10179386793889	0.0557513803178889	0.0511283262667308	23.51280692547	123.993389349847	1.33089120026797	1.73956790275663	0.0960779148615774	0.241177858187586	0.178210637300955	0.319130562138256	0.895772039558261	3.58035054950948	1.3171374097031	0.0415142405161273	3.10678078207309	3.58035057411059	0.577749093945927	3.58035057411059	0.145192650859862	16.8439720594878	34.6915797305452	44.0920639374416	302.761575453307	0.0781629051636333	21.2944378350998	77.6717627509868	19.5835885171503	26.0824425677432	9.96946461864273
Male	Non-Hispanic White	202	13603703	2016000766625	W	N	13	76	53135215	MMFF	35	2	36	237	167	167	13	237	5.1132634253837	4.07727299623769	-0.209351518670745	0.0117832664255035	47.8428402458204	168.181994190103	2.08386708733515	3.031877966532	0.108931713840425	0.889174971659161	0.464617466625081	0.386853543456919	3.38213201083096	5.49556668555067	2.08386708733515	0.0716824465706587	10.1638559507613	5.66453803640026	1.42972005962569	5.66453803632717	0.151938448436743	21.9586812597488	42.8614046860151	98.5693674760881	395.780168028693	0.423968147386653	32.2084627031103	144.904844758668	32.6398007018227	51.9201613476272	20.6188316493742
Male	Other	48	10608106	2014000698817	A	N	18	35	372174318	FMMMM	15	3	06	238	220	220	18	238	5.1831814068986	4.51724951252366	0.418424022651119	0.0565080367442655	139.166844737764	188.611518803188	4.80719961796218	6.97810602293576	0.283086923047214	1.11569866172105	1.58689687518496	1.6544768540039	11.231698196707	5.79664138855233	4.80719961796218	1.30771718148516	41.6452332715386	4.80719961796218	3.29364372922491	13.0673233669496	0.534392060315256	27.9496704521621	103.098083044405	235.055615050256	431.315995528454	1.10616847658911	79.306676943548	422.207822132239	85.3216843342257	140.834279785153	51.8355522231341
Female	Non-Hispanic White	7	10102703	2017001190146	W	N	20	14	2056	FF	NA	2	01	239	247	247	20	239	5.10741672475097	4.17413667780911	0.0473538803596614	0.00817578348878515	68.1349677699034	166.599463300133	2.83982195064124	3.775320378784	0.274079435151251	0.780517652613941	0.664630039049475	0.826092381283818	4.64292156318664	7.71758683037732	2.8398219506416	0.177009522967101	18.7392383793106	2.83982195064124	1.84953249604631	7.71943640203228	0.515229563812675	22.9926900186536	99.3144143725959	133.738169037331	377.839237629257	0.226335481024854	54.9247529314035	187.223168606049	56.2917003840265	66.6121493408582	26.8249040208279
Male	Non-Hispanic Black	154	12401004	2014001198844	B	N	12	9	6149171912	MFMMM	NA	1	24	240	150	150	12	240	5.05587407736353	3.9814835923572	-0.471793320218041	-0.0441103196358249	33.4379095277184	150.169365087915	1.71074363783017	2.44131386618851	0.077448945005097	0.590276048775823	0.223002385436223	0.278053411397709	1.70800507495535	4.25194840139416	1.61341857660184	0.0874120057564966	6.48767295780084	4.34739333862275	0.903716214582593	4.38572639843932	0.182737731911474	19.7248802282409	28.0743165982113	70.8649963268255	363.54268770672	0.291423395124077	22.0267898235929	119.143121639044	24.4808363109473	36.3268738500929	14.6636631432252
Male	Non-Hispanic Black	131	11703602	2018HU0143118	B	N	16	88	50511623	FMMF	25	2	17	241	195	195	16	241	5.16841194992923	4.31045522221453	0.0185449995267804	0.0348781250867773	75.8683970652629	181.869623325264	2.97719784393025	4.17369508796043	0.1607346094539	1.46035173297754	1.10396830692869	0.606885537578433	6.281868895977	6.17885201980968	2.97719784393025	0.0675044930027171	22.7117934856373	2.97719784393025	2.0250309333537	8.09286279888195	0.479922064218715	24.4831559884202	61.4648539665487	142.934691839236	419.700542645997	0.620642617226617	50.2330884226704	238.098664963286	52.7771716109207	84.2761281539213	31.2382887665505
Male	Non-Hispanic White	228	14800800	2018HU1209914	W	N	11	20	595739111315	FMFMMF	7	3	48	242	138	138	11	242	5.01417082392024	3.79023549183992	0.0732293585905197	0.0595597530156199	47.6300969565683	159.769248427132	2.32141907114397	3.02259437161262	0.11550510403075	0.661756797232667	0.610191535557288	0.520194495986215	2.67665630948138	5.49577358898875	2.32141907114397	0.162395909703011	8.11583661548043	6.11446513226414	1.32054907857593	6.31027127732894	0.342887001301972	19.5176641945001	41.5904446964579	105.05788041728	380.837143824549	0.420573023223191	32.5925582971997	162.570811711736	37.2082611036145	60.6111628420487	22.1020652168577
Female	Non-Hispanic White	45	10607309	2017000974215	W	N	19	12	502119	FFF	NA	2	06	243	233	233	19	243	5.10337353153688	4.16857576544166	-0.187812745855739	-0.0578168770056399	53.5578843555292	155.330740697752	2.22002969733531	2.83587888246372	0.200657373220167	0.567169296008615	0.429343177894463	0.70568688460861	2.38916328536476	6.03466439561719	2.22002969733531	0.188845336874351	14.5187555396313	6.03466638434486	1.05004511183291	6.03466638490598	0.319948802354616	23.1248504107003	70.191006672242	94.0125869164216	358.504752865651	0.160380663178676	39.1925561289837	135.861510855826	41.2575941918246	54.6674335868958	19.89727994994
Female	Non-Hispanic Black	95	11209508	2016000679004	B	N	21	62	16215051	MFFM	5	1	12	244	255	255	21	244	5.10689766502764	4.31182474374633	0.192102495904589	0.0192465333982361	90.3713452340702	168.36667636795	3.73489395951685	4.96458953692982	0.349692467177453	0.944269666064464	1.37089885085438	0.835705114017899	3.33705289145564	10.1524435536391	3.73489395951686	0.439310335379905	24.1738490395406	3.73489395951685	2.25371767869749	10.1524943812294	0.593958483894102	23.1964955936154	127.649302376992	161.74818740314	380.841232438337	0.27499178064498	73.8526080956384	265.272274283353	69.6902749194184	94.3963627641806	35.5600404642224
Female	Mexican American	226	14203209	2014000655639	W	M	6	30	40426	FMF	NA	2	42	245	79	79	6	245	4.77132819294993	3.16969456627006	0.0752476103250119	0.0110408391747112	25.6602262556761	119.386846565799	1.62144049369637	2.06199377288149	0.100010653595436	0.225316834045553	0.215086376132357	0.306150871815874	0.968554529135646	3.85122455131329	1.41683842180515	0.0401690444471108	3.26238641180761	3.85122506102238	0.610954219489516	3.85122506102238	0.152175321365436	17.1115684503245	37.4136679564305	48.0694643611456	294.285740201486	0.0841950599570688	21.2245673532118	76.8203026665525	20.1181794790132	25.0191111140428	10.4235017677322
Male	Non-Hispanic Black	190	13603802	2017000791413	B	N	8	43	5918218	FMMM	45	0	36	246	105	105	8	246	4.90093034404052	3.49043675393755	-0.199551997807482	-0.0107022652411983	26.8666235533744	132.9839014012	1.42472896981692	2.14085652123248	0.06503069078512	0.237874972392469	0.150198576452385	0.379723894813957	1.05785117050365	3.86122914628931	1.42472896981692	0.0860946200627961	4.0904177628942	3.8728148691325	0.882592383637946	3.8728148691325	0.0958834382665843	17.8573548151331	22.1737407772826	57.2357484993424	331.870544315256	0.235259647866205	19.0836003931025	82.5765104106376	18.9681022383048	29.5675164504857	11.8206394678714
Female	Non-Hispanic White	226	14400103	2017001365639	W	N	10	36	34103370	MFFMM	NA	2	44	247	128	128	10	247	4.9807830518529	3.70391872117704	0.0824399550188655	0.00496695750131336	44.0955414394688	146.313270206109	2.1361066660696	2.69695390089053	0.160376509178297	0.477323032730438	0.519237703187154	0.518044816750626	3.4951764821593	5.8061070065242	2.13610670581598	0.211602075222179	6.33662519145901	5.80431531859456	1.12739854097397	5.80653993402722	0.300460229214639	19.6429492215405	67.6539517628829	87.8281153732855	342.779345890472	0.160200120409152	34.8076930115029	123.866999404189	36.2177717257389	47.3995988658582	18.3053311436903
Female	Non-Hispanic White	263	14949001	2015000418992	W	N	0	23	3123260	MMMFF	35	2	49	248	4	4	0	248	4.1330563092537	1.92224795754481	-0.119472478679401	-0.0555364249486291	6.06646145573883	58.9989639926579	1.08181401952194	0.148640699296718	0.0169722914538417	0.0606725798298133	0.019633577718765	0.039526474675996	0.0896208525946307	1.08181401952194	0.933597084968116	0.00640114833752268	0.172969588545144	1.08181401952194	0.11584966863578	1.08181401952194	0.0218487023999193	15.243241112247	5.93256320496915	8.04638163560058	173.454330495423	0.0145307122974222	3.62208615804274	11.219181090071	3.50945394600391	4.72234782102432	1.72577144606741
Male	Non-Hispanic White	166	12503305	2017000733130	W	N	16	23	48171650	MFMF	NA	1	25	249	194	194	16	249	5.17078052384386	4.28487068573387	0.0547770300441294	0.0630710022602255	76.6805212417822	187.513628125299	2.97873433405716	4.35177826875181	0.178245422005236	0.823470687689793	0.410453534023653	1.04901633484316	5.37251388760024	8.00402651020899	2.97873433405716	0.365703409818051	23.0672838344762	2.97873433405716	1.9583862688812	8.09703935882831	0.352354023741022	24.7426519596127	65.6720630890178	150.047559598206	429.431633409047	0.571332066673251	49.1488410151088	245.931037279667	53.5757522038884	82.6777160424073	31.9790687641444
Female	Non-Hispanic White	263	14935005	2017001275548	W	N	2	14	3725742	MFMMF	NA	2	49	250	24	24	2	250	4.46349956969981	2.51510204410356	-0.0424314456000734	-0.00270972448192972	11.8540620574863	86.5558478267521	1.88441966991335	0.813333709949147	0.036561602140998	0.0879888058828646	0.0376684506492056	0.112071293092913	0.208692704432129	1.88458278866903	0.69530609628992	0.0105218843169472	1.58850028833678	1.88458278867662	0.283311690516843	1.88458278867662	0.0556721089286288	17.0980450834523	12.9837619903417	19.3046852736582	231.219346195013	0.0307613550434254	7.74853116666871	27.6923803407323	8.31182684625165	11.0469358716389	4.00760505851598
Male	Non-Hispanic Black	130	11600702	2018HU0828747	B	N	14	22	141514531851	MMMMMF	NA	0	16	251	178	178	14	251	5.14446859282026	4.2152581779369	0.0924064029446047	0.00378234594277464	74.2668420473462	172.130160679922	3.18444745481166	4.72721485762284	0.175685734847342	0.795008917265081	1.17485938583619	0.65895404609327	5.75410327562107	7.24926634924576	3.18444745481166	0.346509903762623	18.4063231072857	3.18444755260983	1.93122819041534	8.65622563649376	0.538226487487528	22.3217357488911	68.3372417390923	149.808567938462	402.728287941977	0.63903662099179	48.8861527266287	239.331104933855	56.6646719757566	82.550012788814	32.0616767879371
Female	Non-Hispanic White	48	10800807	2018HU0146601	W	N	12	14	3453312	FFMF	NA	3	08	252	152	152	12	252	5.06233457937884	3.96034353471526	0.0873440353341966	-0.0457696266379234	57.2648827901054	150.892091080605	2.79882808862305	3.61821541987687	0.230170581210055	0.513290602468324	0.312378882513529	0.713252463169072	4.20267933556182	7.60658202912355	2.79882800247786	0.221650581071223	11.7127459544398	2.81406490564158	1.36220479511181	7.60800330007745	0.420255643272859	19.4603079359325	81.7367838249124	114.916011274172	350.793643826718	0.194751034244215	48.6997802801912	177.989827500054	47.0991681236791	69.5996633421252	24.545276835707
Male	Non-Hispanic White	263	14935009	2018HU1195293	W	N	11	67	4311942	FMFM	30	2	49	253	142	142	11	253	5.02630225617892	3.82633536702083	-0.363318146145657	0.0131655644384892	31.9131203310194	154.38783113889	1.58611103470993	2.15246450151196	0.0834534240648742	0.443265908512245	0.245269916384413	0.515468687958405	1.43704066500631	4.31140569778785	1.58607895541651	0.106552385784932	5.6313930115181	4.31140960301	0.851623216664421	4.31140960299494	0.375108521629417	19.1207639894884	31.6149070929283	73.9419205727857	371.175416819183	0.276160170888283	22.9379215619466	117.004795893896	23.6445221246119	38.4215705867927	14.7178379346214
Male	Non-Hispanic White	180	12901808	2018HU1116595	W	N	9	22	940840	MMMF	30	3	29	254	108	108	9	254	4.90396857603703	3.4642758754392	-0.0465910833590846	0.044115498094356	30.4987223349978	140.904742101246	1.53711672215725	2.0430373501291	0.0771794743662332	0.400225720827401	0.201602608179781	0.335390239292279	2.19525995680201	4.17059355010183	1.53711673408471	0.0847190432444159	4.64734253401365	4.1783164487553	0.874359963921201	4.17831645406038	0.297664279618217	18.8415135812655	27.2367994678747	64.41131609514	346.588072081161	0.290732729329775	22.7574537215099	97.2125538636133	21.9724152032971	36.0320829574026	13.3186580324042
Female	Non-Hispanic White	232	14203105	2017000076009	W	N	12	29	41124	FFM	NA	0	42	255	151	151	12	255	5.0607831874284	3.95244579814977	-0.0421867882359285	0.0879161877931742	49.9118779705676	172.207367429452	2.58548466877645	3.01790470975006	0.252998372256647	0.572309169800669	0.861106417949574	0.743049557880846	2.26896618553479	5.50144491529882	2.58539949363597	0.290242380320063	10.7774757890328	2.58539949363598	1.7941219595133	7.0278444626918	0.397750131323163	18.3052865111864	88.6189801706749	126.604286972261	387.338488530507	0.205509114591204	48.7040237059443	167.307405237913	49.2259860379	64.7323995928462	25.0356183028124
Female	Non-Hispanic White	155	12600700	2015001225216	W	N	1	18	618121134	FMFMFF	NA	2	26	256	21	21	1	256	4.43201250907458	2.45247314296374	0.476031515317887	0.032560883516746	18.6996472170021	86.8839562930041	2.73187991188506	1.04521033414981	0.0578035044895785	0.161743628334062	0.0707724448370956	0.200399679059289	0.341923772602364	2.73188005169752	1.6065157702277	0.0269083200133254	1.6041361173122	2.73188013093531	0.37428864099029	2.73188013093531	0.0838856470662089	17.2978550086567	19.0180482443729	26.0436726496945	231.876400014447	0.0478952760013786	12.1745553588562	40.3648908060643	12.3516798351474	15.6605371173313	5.82590925083893
Male	Mexican American	192	13904102	2014000726058	O	M	6	11	393863	FMMF	NA	2	39	257	75	75	6	257	4.76300324298622	3.14094693577969	-0.162451457117347	-0.0431114508063757	19.6582181758758	112.156115842358	1.06582976179042	1.60172369660903	0.0446925167872959	0.200116691965693	0.145372726626344	0.232905751595869	0.622473991212991	2.8785218779649	1.05906870800953	0.0273479943350632	2.94339895089969	2.8788472240169	0.441835845464109	2.8788472240169	0.0914235523454823	17.0819120159419	14.9554369990444	35.7669006338325	292.069781410047	0.158232581049047	12.7506097274275	58.7622292887668	13.0986412982335	20.3240937185456	7.73304915101634
Male	Non-Hispanic White	202	13603709	2017000844693	W	N	9	17	95047	MMF	15	1	36	258	114	114	9	258	4.92549356495822	3.52256176266306	-0.111243861638498	0.0218103191826628	30.3051571506614	140.794852504801	1.55764276625303	2.37053587112607	0.0737315808593996	0.386488696615059	0.291781534592034	0.459603030999779	1.23022876814998	4.23410515968477	1.55764276625304	0.0663545827855683	4.71306694520055	4.23411202673296	1.00652998821265	4.2341120267363	0.112894750095026	18.4557382035652	27.4444749295834	62.2493442188818	346.385327995537	0.280091498242387	20.7290915614262	109.886814849504	21.5809179542234	35.0295116476305	13.4886150122108
Female	Other	192	14101321	2018HU0185161	A	N	15	67	591756201512	MFFFFM	30	2	41	259	181	181	15	259	5.08436972297751	4.10337208712207	-0.327583072131054	-0.0519687131303664	43.6319209776234	153.300647535873	2.01219566211304	2.5740532868642	0.176096322600131	0.4418437744277	0.337591852110726	0.643809073523079	2.33344380305813	5.45833489517284	2.0121956621131	0.119276088681783	12.4600861917405	2.01239175190926	1.16920712322475	5.46971490251474	0.27307470577722	20.683736725585	57.2166185564279	93.9238091369364	354.984875408065	0.151380804376491	34.3340549185176	120.294176743409	33.6097546416148	48.9806408288466	17.8574756602961
Female	Non-Hispanic White	48	10800806	2016000674302	W	N	3	30	333346	FMFF	25	3	08	260	41	41	3	260	4.5959027243326	2.75067677951462	0.253275223146401	-0.0487362571992624	20.165072076608	94.3646438146231	1.45842511322774	1.51392464390365	0.0730368259065388	0.242457442540649	0.137235642422816	0.201063678253778	0.782097519945185	3.06249037578814	1.13363925815752	0.0198584181046486	2.56409579741363	3.06249037968108	0.41600524857305	3.06249037968108	0.110284395908972	16.7822725340504	23.7733200243505	34.7331030500121	246.69414181117	0.0533657410160528	13.8043884183426	48.3255266392358	12.4871595000922	19.0285276834814	6.94830856122699
Female	Non-Hispanic White	94	10800818	2015000862952	W	N	14	60	143112931	FMMMF	NA	1	08	261	177	177	14	261	5.09304798030834	4.09457559631582	-0.0617395951929222	-0.0219067560526882	56.4206937191422	159.356084639729	2.5005959109798	3.35354765246405	0.255362436620855	0.583500108505569	0.903626565137964	0.79745990658649	4.28495493220219	6.78391262131512	2.5005959109798	0.226964637378869	14.0313860519569	2.5005959109798	1.36248525563433	6.79732442513537	0.406773749874887	21.5628992958862	71.0031678773791	102.139474221018	365.450319390089	0.176650068680579	48.3800271370647	151.276754990933	45.9612947164822	62.8406321765654	22.846089358328
Male	Non-Hispanic White	202	13401504	2018HU0897720	W	N	17	26	13174950	MMFM	NA	1	34	262	215	215	17	262	5.17685782295391	4.36430121612429	-0.0838156123414777	-0.0177293064278325	72.2755287571903	174.012740278608	2.74955914030825	3.95722483245107	0.154922247746695	0.80565136403786	1.00056489359448	0.780954203264037	4.68516607225722	7.42979947051564	2.74955914030825	0.243912487086549	23.3002799768055	2.74955914030825	1.78040583312432	7.47407652728699	0.324219774184647	25.2862244705482	59.6103702541059	117.842316916685	406.027257646736	0.539945118364097	46.0123183778402	205.106740364669	44.1217236406607	71.3073211245522	27.9098989369219
Female	Non-Hispanic White	222	14702504	2018HU1214308	W	N	12	23	3712	FF	NA	3	47	263	145	145	12	263	5.04511293155419	3.89487041529218	-0.293847720584055	-0.0193297316105034	36.6356824100249	152.289482531655	1.7563028901542	2.19721126733033	0.152720687073872	0.211252261554014	0.408008814997279	0.486185773500178	1.60991319545755	4.70710574076746	1.75630289015423	0.140125643270231	7.41712463741402	4.77412623157626	1.23108060604021	4.77412623157626	0.233654968723793	19.8595468443396	52.6798940455094	74.1297518111197	353.227323876342	0.119634319728421	32.0450111491799	96.8291122405295	30.9990000994296	39.421769618056	15.5093542451363
Female	Non-Hispanic White	191	13900400	2014000522267	W	N	6	14	122586176215306	FMMFFMFFF	NA	2	39	264	80	80	6	264	4.78201023673885	3.13263420858983	-0.00405937900803366	-0.0138505567214624	22.8414034422114	117.702432384045	1.69458568647625	1.75242729877334	0.0924764513042689	0.372739214336743	0.190195131470762	0.249267429410736	0.851406340395643	3.375535770127	1.24180351199497	0.0502839681200517	2.86005914842926	3.37554844635007	0.660921359864841	3.37554844635007	0.123140825801437	17.393422472315	30.5653995408612	44.5823498604835	291.166185020672	0.0779096147494703	19.7783830275398	62.1023831187788	18.8611089944762	23.625775040537	9.03921691623647
Male	Mexican American	203	13700500	2016000562139	W	M	10	8	19103821	MMFM	NA	2	37	265	125	125	10	265	4.95212294623157	3.67781295890281	-0.0550333512340884	-0.00426502681594229	37.4414959847481	140.87287943243	1.96243467813702	2.83498011090247	0.100798119335538	0.512812868794781	0.36943389509909	0.500541879449785	0.493543355955911	5.33441918997251	1.96243467813692	0.115502757346467	6.20088288866298	5.2444262053043	0.857454217101605	5.33445052511736	0.201550901425943	18.0791043399978	33.7841242638842	86.3161762369248	346.529290171285	0.332711126969307	28.9047766256112	116.432969646334	27.1968978351682	46.3691686992706	17.0010274005573
Female	Non-Hispanic White	84	11304006	2018HU0806679	W	N	4	12	439351	FMFF	NA	2	13	266	50	50	4	266	4.64024133335309	2.83882797638946	0.256390391113602	0.0100679947417804	22.0920621993209	104.617341655519	1.24188633949116	1.67488856053146	0.079203908229422	0.18917557174464	0.182451384182799	0.173856051418143	1.0305062052919	3.37476462781459	1.24156214151938	0.0342854654929473	2.86566781950151	3.37491449641455	0.59657375137119	3.37491449641455	0.126581966299262	16.7936723343891	27.7858854497418	37.6652731252002	266.5352280752	0.0681104046646953	15.782896941175	59.6795455992703	15.9905523298813	20.885764914918	8.27299799839083
Female	Non-Hispanic White	155	12601802	2017000438479	W	N	2	24	38251	FFM	NA	3	26	267	28	28	2	267	4.50087698498267	2.58613621549756	-0.399872609089508	-0.0106801706054267	8.90188993470012	89.1389879867416	1.3515024764585	0.601781835133729	0.0303677838426054	0.0922026818932911	0.0284350331859833	0.0781068234801852	0.265088936894715	1.35150330288478	0.81099561458478	0.00809264771791323	1.13789175078213	1.35150330288513	0.189668493640878	1.35150330288513	0.0452270905005935	17.9043925359127	9.8997724824943	14.3316110878512	236.375593420761	0.0219902416999864	5.81658841647882	19.9297041928826	6.01355181276521	7.30569599284886	2.93809118580881
Female	Non-Hispanic Black	131	11703415	2015001056592	B	N	9	13	9274140	FMFMF	NA	1	17	268	119	119	9	268	4.96215608856248	3.71416093973038	-0.205403008683587	0.0200206078716347	33.4067485192244	145.791380100944	1.75656857476405	2.64869746682452	0.156302840473093	0.174911392607367	0.312787267444811	0.437363701155889	1.66959386194376	4.73070477424841	1.75656857476405	0.0829262171355447	4.50072181857311	4.77484843722332	0.801605330648693	4.77484843722331	0.313712736975777	18.0181863574846	48.1356113907828	68.429304861094	341.861932367608	0.129790528683379	29.3510137336102	101.448811434499	29.5487469842367	36.8263155429481	15.0125981826263
Female	Non-Hispanic White	191	13703104	2018HU0922072	W	N	9	22	541942	MMFF	10	6	37	269	108	108	9	269	4.90952763464651	3.49600555328432	0.0354315455359168	0.000955002531117053	34.1730423825548	135.704894832983	1.80868022491307	2.36160287881837	0.156186349008241	0.456457764752703	0.311932302538641	0.417414147135713	1.58090547584164	4.90572267840679	1.80868371320657	0.144267930449209	4.69748032913887	4.91650253274457	0.795204148204528	4.91650253274457	0.181838222347607	17.893910765408	52.8330301995068	73.2178606520639	323.965297826173	0.110100853156697	28.9623895323327	100.234658451915	28.9726092085128	39.9439558965595	14.6487405261677
Female	Non-Hispanic White	124	11701205	2018HU1062892	W	N	3	31	6331	MFF	15	2	17	270	41	41	3	270	4.5959027243326	2.75067677951462	-0.276678156173096	-0.0461921230835243	11.8698150041674	94.6050257765881	1.42279326256334	1.01132910685987	0.0407105808363948	0.0879282981766069	0.0693135572206995	0.169163451330027	0.514053704847912	1.87105248403444	0.688402645950145	0.0189461166446651	1.57669945292867	1.87105248428097	0.209848204379957	1.87105248428097	0.0634673378326987	17.2445736846329	14.5650893852538	20.3410687938125	247.16530842161	0.032689518182079	8.61906767195093	30.2696333316688	8.84152484093482	11.0527816308569	4.25323139334387
Female	Mexican American	178	12400902	2014001354755	O	M	15	20	15474818	FMFF	NA	1	24	271	185	185	15	271	5.06493786228071	4.16467965525532	0.015204959096375	0.0326146952001263	65.3583113677784	163.620963952937	2.8652005630421	3.73385014203776	0.268792568214629	0.911638719769964	0.752312439988137	0.642135760002825	3.72705254390931	7.78650501052207	2.8652005630421	0.341130951119564	17.2290984431207	2.86520056305347	1.56266293598757	7.78842262540599	0.352467460589432	21.8110772456308	91.9110843692395	119.690985372516	372.761514859203	0.190541118501281	51.8254451935846	199.334966029794	51.2530482372079	72.6069924281037	26.7009125563754
Female	Non-Hispanic White	119	11800401	2015000062774	W	N	13	26	7100101453941348	FMMFFMFFFM	40	2	18	272	158	158	13	272	5.06784264756041	3.99921294467994	-0.179285502128191	-0.0228742928603131	45.6008995159042	155.239386523686	2.11073553713042	2.99678176563177	0.200553328009734	0.500183012262184	0.657325410880294	0.623797979008087	2.66929770847242	5.73205473666136	2.11073553713042	0.196512529122498	10.7412938782379	3.14194610820685	1.25543806424673	5.73757405517193	0.292116688372964	20.604269560429	64.5536313295223	89.5482762538305	358.346606543081	0.143250139176484	37.6819414563611	121.681524051674	37.1692127322203	51.6092616480007	18.9093729260144
Female	Non-Hispanic Black	178	12500505	2018HU0816886	B	N	13	17	16464813	FFMF	NA	2	25	273	163	163	13	273	5.08029429066089	4.11195768659537	0.276222811204226	0.0635002672614922	80.4938269633918	171.364789788504	3.62414631620576	4.42230243898821	0.339590435053999	0.6199181080107	1.44650805805036	0.760588322403649	5.08193718868137	8.87577223578827	3.62414631620576	0.644801634590697	17.8431473410476	3.62414631620576	1.90162988848826	9.85145107498898	0.498688868542676	21.2104241772621	123.689998283517	175.621359036936	385.916237700143	0.285046448386782	70.1236902555672	230.463211384451	74.7450310769797	91.8568183901117	34.9654227806239
Male	Other Hispanic	47	10606706	2015000265887	O	O	13	16	1332930	MFFM	NA	4	06	274	157	157	13	274	5.06574592397093	3.96374844053451	0.0327049167003977	0.0360633493840083	54.4048528799354	164.318936388788	2.53729915037724	3.50713405087305	0.1337487336316	0.747842465900303	0.6057713272063	0.275450886152742	4.7719050889091	6.7425121066201	2.53729915037724	0.103157373356961	12.2603358180652	2.53729915081961	1.3715545974178	6.8970941729231	0.351204468459699	20.4420333021612	52.4211565278965	124.732933303439	388.94224495026	0.452306627886505	38.3740628602844	176.630564397438	40.6253173018873	66.5718861594522	24.6715706914528
Male	Non-Hispanic Black	191	13604002	2015000149052	B	N	8	49	387229872	FFMMM	15	2	36	275	103	103	8	275	4.89396797717093	3.47080229893582	-0.0935769073692471	-0.0632454812966465	29.2893916743091	125.301457745204	1.54616614871652	2.26674877332767	0.0703087283754163	0.234791591708029	0.257515061117351	0.300736526331953	1.21936967199674	4.19851199466672	1.54616614871938	0.0725919676590628	4.46665520166104	4.20291534583337	0.810407145444335	4.20291534583313	0.21897122594196	17.9432368240412	24.0909161147865	63.2927593806429	317.385073291779	0.253185878237349	21.2385879681717	95.8504731638935	19.1712266433358	33.7365797956423	12.2682514107878
Male	Non-Hispanic White	52	10602300	2016001219537	W	N	10	11	101239	MFM	NA	0	06	276	121	121	10	276	4.95335642898165	3.61071817275158	-0.278327442886546	-0.0732547775036419	28.0052146368341	131.64404501746	1.46636968920217	2.16359571146422	0.0677175241808541	0.325937453892798	0.165300789414741	0.245234072359099	1.09661509645291	3.98596748467806	1.46636968920217	0.0432860312840744	4.71652237115434	3.98600607996139	0.743895728326539	3.98600607996139	0.149915013931156	18.0983287580152	23.0036808278498	59.4086434611199	329.359594281877	0.245922776114232	18.3401095437533	94.2642594436708	19.3766853767255	32.7655130671862	12.0740731475717
Male	Other	257	14805303	2018HU0229202	A	N	17	19	1742	MF	NA	3	48	277	212	212	17	277	5.17605185370643	4.4361567338882	0.153877846005156	0.00826050603972202	98.4978361477265	178.450697706956	3.74272687438731	5.22256771497899	0.22302772922226	1.192274558503	1.44723214949965	0.682218188523322	6.07976191005229	7.33990971548712	3.74272687438731	0.534355548619121	30.6781301835058	3.74272687438731	1.95474359925007	10.1737847092829	0.672349217555373	25.3171317206658	79.7435481115911	190.661166472733	413.769136434997	0.762983903658435	63.1428271975572	310.89448978879	57.9813814762353	92.4435587036865	38.7156216681823
Female	Non-Hispanic White	149	12801100	2014000753653	W	N	2	61	212364	FMFM	40	3	28	278	28	28	2	278	4.50087698498267	2.58613621549756	0.0178067337534773	-0.0577210567222404	13.5169296678439	85.042907926759	2.06499072797466	1.05537046725868	0.0435161352982701	0.123505737216678	0.06463950783362	0.137774797966825	0.454842548206445	2.06501174382556	0.77466426641682	0.0217471198327822	1.72201064804587	2.06501174382603	0.294659430137773	2.06501174382603	0.0815545608144928	17.7930340602239	14.7648184888852	20.2437788429212	228.181501823007	0.0336455092035358	8.15412943298868	28.0035800852888	9.21504020355038	10.2903753934305	4.33359664968483
Female	Mexican American	155	12702400	2014000937849	W	M	16	92	46121647	MFFF	NA	2	27	279	194	194	16	279	5.06522279462005	4.13028836622162	0.0151478248908335	0.00743801544528276	63.145159252795	159.598423965702	2.71360464209889	3.61077131987563	0.254885765301076	0.821515404045985	0.786753861174376	0.803649196686641	4.4182072838318	7.32262882193332	2.7136046420989	0.272020299331177	16.8275937328346	2.71360464209889	1.43207816961478	7.37634216787496	0.310797789995567	22.2698449409912	80.2618778853456	111.976704465439	365.867056660116	0.189007084277958	50.6358627337103	161.360347116681	52.7566324289143	66.1663035965279	24.8204635835987
Female	Non-Hispanic White	149	12600200	2018HU0239555	W	N	6	17	3196	MFF	30	1	26	280	76	76	6	280	4.76470050211814	3.0917297217862	-0.557784370172069	-0.000443166222276626	12.6031319636637	117.24401202768	1.74385332634791	0.955838822556367	0.0498867363618458	0.11509972254411	0.0659308647843827	0.161613910621477	0.445653392294117	1.92967708368844	0.710934838690014	0.0291351381200873	1.63226444955839	1.9296776470307	0.38863696794117	1.9296776470307	0.094750810315267	17.7536723043947	17.3451546523157	24.3704993865418	290.315257869173	0.03925270576476	10.9308810978402	33.4808847369779	10.0732559388994	13.2629226825152	5.15228827486658
Male	Mexican American	179	12504800	2016001507665	O	M	5	11	50376245	MMFFM	NA	2	25	281	63	63	5	281	4.70644987448409	3.02028358330165	-0.306581922862993	-0.0441956930433522	15.0850118843845	105.874473640413	0.976806340759325	1.26250621812684	0.0302647516307735	0.191379970136188	0.11841050218206	0.227766732615792	0.703094109782833	2.39254500068161	0.880170966289625	0.0188384729176921	2.43599127936484	2.39254500160799	0.396828904728292	2.39254500160799	0.0412833453792729	17.1387847082717	12.3583040484197	26.6588933180512	279.713130233719	0.118274437426447	10.7905693482981	47.2067713498595	10.4402912598068	16.6508404372526	6.15486448662485
Female	Non-Hispanic White	84	11300200	2014000946451	W	N	6	51	254256	MFFF	25	2	13	282	83	83	6	282	4.79468195050495	3.16493504780352	0.105808177827897	0.00695675247020685	26.3309018738492	121.709700239434	1.4674900774338	1.90904078215362	0.108756885713982	0.295244599799832	0.147629044541627	0.323305745312266	0.995392423438344	3.98905155659207	1.46749007467451	0.0649802181838157	3.42614381717875	3.98905160328819	0.705509186624065	3.98905160328819	0.169174276713235	16.9428115196378	36.2472582766547	55.010796427064	298.569714186958	0.0862282232847204	20.7004742600095	79.6238721738077	21.3038688946261	29.5848210205984	10.9537023038
Female	Non-Hispanic White	154	12401203	2015001327200	W	N	6	6	637939	FFFM	NA	3	24	283	82	82	6	283	4.79047086992753	3.15396911250912	-0.295140401501564	0.000624525565970856	17.4410864155034	120.433218440953	1.05837837547035	1.39650587960085	0.0729293862755706	0.288346291903692	0.124010658461443	0.196456134918728	0.638042142352709	2.87611455218309	1.05806442685002	0.0400914111723421	2.45468182681866	2.87611730466639	0.479824592147825	2.87611730466639	0.138077852281835	16.4839550163431	27.1111557337458	37.4186545424534	296.21808992611	0.0654161045045666	15.9661117523926	48.3491616504486	14.0430653769505	19.8521783147464	7.8354455880194
Female	Non-Hispanic White	228	14800800	2016000813545	W	N	9	15	1393639	MFMF	NA	2	48	284	108	108	9	284	4.90952763464651	3.49600555328432	-0.435444554293688	-0.00878887652757708	21.3395252567981	134.389024004227	1.34215419457438	1.6097965350337	0.0908520766774748	0.235046330280987	0.129304780771567	0.309403336788473	0.959708763537081	3.15160466160616	1.15946653969757	0.0142394540265843	2.96758891000878	3.15175682556619	0.58999376667941	3.15175682556619	0.13677858389844	17.3893310184368	28.3177736209992	43.5683113752117	321.60641855123	0.06771641052521	17.9911929698973	64.8870352911488	17.5994149781076	23.8910366011104	9.32229703155306
Male	Mexican American	156	13100901	2016000819042	W	M	15	37	40151141	FMFM	NA	2	31	285	184	184	15	285	5.13442984035999	4.19424796537413	0.131623193751037	0.0274387764986238	75.631371128153	174.490206500047	3.11778328345588	4.5716391538153	0.151325585352407	1.09227688431908	0.777514015421334	0.853050828458505	4.03567355868364	8.37947279224664	3.11778328345588	0.480695467855709	21.2421521022151	3.11778328345588	1.83774780563766	8.47501364447954	0.180971599259021	23.2580590926513	63.2673880493291	151.500390576845	406.862532196567	0.64860374236408	47.5432707839028	262.315988363752	53.4504736998095	78.4791785151685	31.7127300386746
Male	Non-Hispanic White	192	14100400	2017001142310	W	N	17	21	13521917	MFMM	NA	2	41	286	207	207	17	286	5.17637376298028	4.34279077292562	0.279076123846555	0.0129363474202943	101.683687989396	179.344782142739	3.7047762414302	5.29242762910832	0.227951245850968	1.61841832323365	1.82033543800392	1.06316416949036	5.29384098245471	9.76873060537812	3.7047762414302	0.445302417082258	30.5105529234371	3.7047762414302	2.57072015917711	10.0706259339389	0.476893560526014	26.4466476145781	70.8970974102911	174.178609393572	415.322982996643	0.766093057269864	61.9580186380957	284.316292831011	67.650752447292	101.599468093716	38.466967998147
Male	Non-Hispanic White	76	11201102	2015001010034	W	N	4	15	450	MF	15	3	12	287	49	49	4	287	4.63890234771618	2.84512158186102	0.093679211885568	-0.0149603611124052	18.8931759070316	101.894909852759	0.962469780233938	1.39940443330648	0.0364737696137275	0.241686997256408	0.0955142952735589	0.193338114884687	0.785892514837487	2.61626243026526	0.962469334500642	0.0371536829009651	2.66486036612594	2.61626243924878	0.420175744870483	2.61626243924878	0.0807776768266471	17.2303251899127	12.2699390470951	32.3420004972258	271.790186906182	0.134499327330268	10.57033978046	51.8155181875873	10.8232957707705	16.7377144307982	6.53974185011334
Male	Non-Hispanic White	203	13604109	2015000018942	W	N	11	36	3711395	FMMM	NA	1	36	288	135	135	11	288	5.00526659499132	3.76300999468305	-0.12730286630592	-0.0151441216074162	37.9286638511475	146.954420398747	1.87302488715316	2.70067310402254	0.0856914949847104	0.585961848293098	0.373629354123855	0.511656145113488	1.69021942842049	4.96881449038941	1.87284851086471	0.124700921200829	6.56553556106229	5.0779487231124	0.770901301871866	5.09093007454013	0.424651339304209	19.2518589363147	33.2040113392213	75.8716134066624	357.689668266389	0.36792395879782	27.4758376446437	130.430561097107	27.1491378754109	41.4729605251347	16.74746406411
Female	Non-Hispanic White	43	10603719	2017000776064	W	N	20	18	822051561847	FFFFMF	NA	1	06	289	245	245	20	289	5.10781844410782	4.1734997471573	-0.254588960158855	-0.0179983442001827	50.3455778446422	162.360650729945	2.1489984838427	2.9333105365254	0.206811079271282	0.272841448894785	0.650778145954557	0.726337356012515	2.55390575960639	5.8415671999635	2.1489984838427	0.191119071293085	14.2020290713499	3.95365903605713	1.18672071964173	5.84158352780524	0.252868624984157	22.4274608469291	65.1037829707996	94.2731997184154	370.605999238936	0.155881885202711	41.0579595913018	138.964924706702	40.3890073269648	49.845114061012	19.910793261687
Female	Non-Hispanic White	83	11209905	2018HU0512810	W	N	20	20	174320272	MFFMM	12	2	12	290	250	250	20	290	5.1064302743896	4.17513609739919	-0.311845745861455	-0.00749688499246537	47.6217862825127	163.847053061742	2.1613204327521	2.84823887703164	0.205583906533753	0.608567792971223	0.296968298387241	0.493954452020282	1.55995014393443	5.87507713999879	2.1613204327521	0.233225902573479	14.4809636174889	2.16189737091596	1.35013019324327	5.87507805773605	0.310670063803571	21.0336538538498	64.0537014562113	98.6839612330081	373.147755572408	0.173224876307071	41.6181542336479	135.7592586857	43.0054747265975	50.1680232906239	20.1622967138558
Male	Non-Hispanic White	46	10603701	2015001467748	W	N	7	15	768434565	MMFMF	NA	3	06	291	89	89	7	291	4.83191587664268	3.24882314196705	0.251755863520875	0.0320604416151879	33.1346315391168	129.538264758953	1.74303972621305	2.58487400229839	0.07005511777882	0.610747366314655	0.169834452645757	0.323533711004051	1.33570885582099	4.67483929997181	1.72285560957689	0.121135736983019	4.90090528262113	4.68320709535453	0.92732304626269	4.68320709535453	0.177458652701124	18.2323902346918	28.5774579136275	63.6612882331663	325.400309430483	0.276261580472248	22.6605615939969	109.478302288729	23.1615659030422	38.2659434308646	14.0154437078668
Male	Non-Hispanic White	118	11703207	2015001234643	W	N	0	8	02229335652	MFFMMF	NA	2	17	292	3	3	0	292	4.12062723774097	1.88172339370996	0.0345095413228879	0.0139318915121983	6.79531181223915	62.4620473098463	1.22068552710094	0.18017489300174	0.0119248799796851	0.053295130492385	0.0182257214155225	0.0789667791003088	0.0980142047046581	1.22068552710088	0.942117492176313	0.00417957265986911	0.206932468542447	1.22068552710094	0.138146033821024	1.22068552710094	0.0371702681002703	15.1321304364046	4.34477887106035	9.59896546699504	188.291869059803	0.0413360109506771	3.43960696578806	15.9752811859927	3.31635398517925	5.64649578219993	2.11388272019594
Male	Non-Hispanic White	196	13603312	2015000982038	W	N	14	20	13161451	MFMF	NA	1	36	293	179	179	14	293	5.15014190278977	4.16693049931514	0.239450981542256	0.0416413889939016	81.9723078316428	179.788883264037	3.37586714791537	5.28178591521649	0.205580700324879	1.05945623110443	1.10066305571802	0.666133667323037	6.69476061816672	7.92030015059405	3.37586714791537	0.56177374701385	19.6384299764913	3.37586714791537	2.59775224183347	9.1765583226315	0.559446424324024	23.2818524070953	67.1662765795832	172.565234480615	416.094074721336	0.746057184460287	60.1546738030443	251.945347604382	53.2667229029999	90.905320728952	35.11695793235
Female	Non-Hispanic White	262	14801905	2015000105918	W	N	13	42	17134341	FFMF	NA	1	48	294	161	161	13	294	5.07053859240926	4.01533624016474	-0.246254673878574	-0.0525219928340398	43.3402414121848	151.111292169734	2.00841199998148	2.49899777744361	0.16119585638992	0.490629389451466	0.376508775481975	0.563297096429644	1.51419897041064	5.45820797394649	2.00841180382926	0.0668315889817498	9.79313344101973	5.45942931031374	1.17618544477849	5.45942931009574	0.205843404414143	20.5793600338921	62.8737672422183	80.749713614626	351.175773169707	0.141808033998819	35.6315483301565	121.449596881565	34.0117536768157	46.3870941025621	17.6326392013227
Female	Non-Hispanic White	179	12601400	2016000641683	W	N	0	18	430222472423	FFMFMFM	NA	1	26	295	7	7	0	295	4.20285370779385	2.03513747318947	0.608663062691904	-0.00407640394958159	14.0665626230572	66.6048437475739	1.84494760795988	0.327221487674942	0.0446469074741149	0.141468430282008	0.0465468209701936	0.116710935230113	0.263513337038734	2.37397336319555	2.32571384372073	0.0166093788521204	0.948920644989185	2.37397336319562	0.228567092182128	2.37397336319562	0.0623887807817247	16.1067020211493	13.5752450612457	19.0359699065731	189.968335798733	0.0324185137858286	8.18366475242156	28.0617265872493	8.01357901862085	10.7549320275227	4.14765463532205
Female	Non-Hispanic White	274	14804100	2017001255556	W	N	8	24	36116308	MMMFF	NA	1	48	296	101	101	8	296	4.87517347666408	3.40065879449427	-0.0862214353473302	0.0315427814426368	27.5069131168315	135.19474007843	2.39708690501256	1.9415577566662	0.124977048489663	0.392803877879439	0.277684954581286	0.309889388170684	1.20018245307739	3.90192783838354	1.43551395109982	0.0570260443321348	3.52958646324698	3.90213148777014	0.661953999660611	3.90213148777014	0.181076892656573	18.1617174342328	40.7176432624575	55.429730480389	323.0514570473	0.0888966865439774	21.821751488625	75.6293382281473	22.50013259797	31.1131991784853	11.5936218378514
Male	Other Hispanic	55	10602300	2018HU0873554	W	O	19	26	217319	MFM	30	1	06	297	238	238	19	297	5.15968309323218	4.3409829889378	0.0567489387332166	-0.018919198321689	81.2663415431097	170.84622704992	2.90935170028179	4.29360765294924	0.163145469053967	1.2026868573511	0.843960281663676	0.813668442784931	6.55384800641511	7.90842688770144	2.90935170028179	0.454282084835754	25.7387565726479	2.90935170028179	2.00455577180921	7.90843785944613	0.63123751495007	26.9328008144352	59.8318872392977	142.196893256397	400.473192103679	0.561708572365476	43.7484429629953	226.69082788155	49.6188537792026	82.6678050760976	29.1279340591029
Male	Non-Hispanic White	83	11209905	2017001371334	W	N	17	9	173039	MMF	NA	3	12	298	210	210	17	298	5.17589457036417	4.34976401871264	0.200760197433066	0.0594890275121243	94.6820291561567	187.801132644396	3.61267965977886	5.1255770450039	0.208057486826406	0.844694283159443	1.23186854596729	1.51991873553641	5.269845845355	6.63492926352311	3.61267965977886	0.471014232713491	29.7634786834422	3.61267965977886	2.67691773921953	9.82028118815506	0.588102946824728	25.2082548337409	80.5328974564744	198.958908938153	429.925357074989	0.794038486542689	61.6292253320228	294.039821464023	64.5662603849805	106.943161462532	38.8295648181994
Female	Non-Hispanic White	263	14949003	2018HU0527698	W	N	2	27	386103582	MMFFMF	NA	3	49	299	32	32	2	299	4.53471707216928	2.64545159428727	-0.0779704727951237	-0.0162634743750637	13.0329546314704	91.693692956272	1.93487894137414	0.961355740193535	0.0409206718300813	0.114836155955138	0.0587855327632852	0.123182903441961	0.191338319739115	1.93487893008422	1.3804163613635	0.0189841486381623	1.61906837572944	1.93487894137414	0.286770837923868	1.93487894137414	0.0617662080566015	18.3097986071919	14.6291928324435	20.4376253681088	241.438462037955	0.0374431660815934	9.0445946392123	26.9701828023632	9.17974697003572	10.9381767672893	4.29641061261684
Female	Non-Hispanic White	191	13704900	2016000246478	W	N	17	12	664219441747	FMMFFM	10	3	37	300	210	210	17	300	5.10059688154574	4.14871123506498	-0.00558894353227087	-0.0218870081346591	62.9992166087651	160.566770785035	2.6933669529917	4.04579180618332	0.247411463650179	0.507297855142168	0.761022946990172	0.752178544798516	4.00735207435022	6.93072934523505	2.6933669529917	0.376698896281037	17.437737183849	2.6933669529917	1.44930616299354	7.32133044568943	0.413931691950194	22.3905062727482	83.8695942171325	122.715201386697	367.530692347146	0.200124947943294	50.6993434613836	159.544840003482	46.9947277670693	64.2630076742496	24.7473755244491
Female	Non-Hispanic White	114	11802600	2015000203143	W	N	15	23	937151412	FMFFM	15	3	18	301	186	186	15	301	5.09769814258581	4.12011251299862	-0.279210931729195	-0.022255747335604	46.5674398508671	160.042978573955	1.95708539130293	2.67714366904996	0.169521371705977	0.620069118975133	0.202293061065038	0.548378463502864	3.09942483976606	5.31689589662044	1.95605055923871	0.112742104322406	11.8753342511045	5.31709669072575	0.911380651055967	5.31709669066774	0.249727994682094	22.8068692196742	58.1363217269461	88.1730945006222	366.63112116277	0.146910303574532	38.3085139484504	118.160207190701	36.2813497618219	46.7112602792255	17.9287252396188
Male	Non-Hispanic White	228	14702501	2017000738652	W	N	2	27	29228	MMF	NA	1	47	302	34	34	2	302	4.55214804780535	2.69586894879664	-0.0215685885908901	0.0023888386086516	14.5021999731744	95.0627202025061	0.874065177045209	1.17669747553564	0.030973379687198	0.236721248385122	0.0930319736002803	0.170337878201201	0.389515394273053	2.33545563743878	1.14020371844299	0.0256665426183532	2.40001244233146	2.33545563787317	0.312757723593794	2.33545563787317	0.0602395622492989	16.8793900515528	11.0791477180559	27.1475200267666	258.004382658299	0.111991190047442	8.84677585198114	40.1707143481094	8.51679101113344	14.2156453764785	5.54171557716012
Male	Other	46	10603724	2015001415035	O	N	12	118	411246	FMM	40	4	06	303	153	153	12	303	5.04969836498467	3.93883651283879	0.127775826604739	-0.00912877521626108	58.3589271073049	154.558024628281	2.79879567894436	4.35508836447171	0.138001404317233	0.893605271780309	0.69596903272484	0.803048155203598	4.09417686472001	7.0139545421946	2.79879567845808	0.250231449187366	11.4087783353756	2.79879567845808	1.85177979472812	7.6079154343218	0.374464233553958	19.8514424816661	52.3532767908995	119.96070163622	371.482255794263	0.543513936287122	41.0480344973972	210.109003488929	39.0683783500018	59.1214809872134	25.9925733035211
Female	Non-Hispanic White	48	10607322	2014001125224	W	N	3	19	1334155911	FFFMFF	NA	2	06	304	42	42	3	304	4.60123528663073	2.76087326239129	0.102744914091748	0.0169222824284972	17.5248202568526	101.307208542074	2.65183437348405	1.22910680371924	0.0648375180604654	0.248086758209087	0.0598537442178426	0.188487334929345	0.621726733104076	2.65183451725861	0.975929422052481	0.0338432661542353	2.25094845349953	2.65183451726968	0.339723832273543	2.65183451726968	0.101406112436699	17.9639416188989	21.417500643577	29.962294101978	260.184918572245	0.0549933331630255	12.3488550142055	44.274799259663	12.5805582839557	16.6588819462351	6.34562005969421
Male	Non-Hispanic White	48	10607313	2017000699563	W	N	15	20	2525158251	FFMFF	142	2	06	305	191	191	15	305	5.16798559791516	4.26182625286542	0.0366604750671213	0.0236206458980379	73.5883502038445	179.757054824805	2.94765276667395	4.21933149257448	0.156894226951516	0.948518960973473	1.0806382253744	0.944877332827133	6.14161250263039	7.22630135679802	2.94765276667395	0.42478528908428	20.1408695423766	2.94765276667395	1.87528796026909	8.0125509504107	0.431164805431917	23.9650674719328	60.8799014744238	157.687051511188	416.038826930892	0.596437414623199	48.7440709283667	227.17606835855	51.9719490834284	81.7047950887379	30.6584499811657
Female	Non-Hispanic White	275	14805909	2014000990564	W	N	12	12	125320948	FMFFF	30	1	48	306	151	151	12	306	5.0607831874284	3.95244579814977	-0.0171431416148011	0.0164015556672854	51.1776368591726	160.322072181325	2.55337379816318	3.35664464671901	0.226766539964866	0.684637371908339	0.594633536219217	0.825461514045135	3.43346153247684	6.11341205836871	2.55337379815859	0.256961818750634	10.5117584112663	2.55337379815859	1.48186633626514	6.94078959679775	0.395993364381051	19.0431432703196	73.4494470762802	117.400289762225	367.110533541253	0.198550478131052	42.9741797580411	155.898777937792	52.2079439399085	61.6158705971128	23.4342604343064
Female	Non-Hispanic Black	190	13602202	2017001013361	B	N	12	100	1215104649	FMFFM	NA	1	36	307	146	146	12	307	5.05600081765439	4.00270240477821	0.505991776278124	0.0036878577351819	90.8031685620611	157.541462153547	3.99930926893622	5.56697467606599	0.362598499288779	0.902869391113222	1.2519560188257	1.10061094808402	6.91729580513139	10.8588939714304	3.99930926893622	0.734226078091989	16.3703976161417	3.99930926893622	2.24098272233195	10.8712497120095	0.559828224887297	21.7047128531308	116.727180995758	189.311540889012	362.324758739361	0.298004837897695	70.7775488041578	231.573897682702	75.6474365999991	95.202400252141	36.2262191497852
Male	Non-Hispanic White	84	11304000	2014000036167	W	N	14	53	366414	MFM	40	2	13	308	172	172	14	308	5.12958112232128	4.11483512911212	0.0401061601256361	-0.0278137630147461	63.7482217312527	164.312049261268	2.80474741734418	4.15506840969897	0.150115418141666	0.666726737893722	0.948471005705681	1.02544473381094	3.24232019722751	7.62193918705549	2.80474741734418	0.172805755371732	16.2579358362295	2.80474741734418	1.77712971797177	7.62409390870198	0.483691121799072	21.7286854199569	56.7227079203349	131.824736643291	388.930018534371	0.545937933734617	44.2359906704908	215.540914206984	48.6386516528965	70.2785103230564	27.2712616252975
Male	Non-Hispanic White	192	13905506	2015000071983	W	N	9	20	516703192849	MMMFMMF	30	3	39	309	110	110	9	309	4.91078172005579	3.48211862866679	0.085926265827523	0.0836297916790328	35.4472223005782	147.586067153946	1.77460098343668	2.67539874765369	0.0839660312987185	0.419018372079615	0.45018521820135	0.502571877160055	2.01539047789965	4.82373296833909	1.77460098099834	0.052137138941585	5.36566342178787	4.82386559876537	0.955252450497536	4.82386559876229	0.175851706942076	18.9747564012704	29.6110841203039	78.4485041470565	358.842129407569	0.311768342273923	27.7117412795551	118.005306201902	25.0471293013994	40.9304250275261	15.9200398696165
Female	Mexican American	190	13603313	2014000393302	W	M	12	49	6474812	MMFF	30	4	36	310	146	146	12	310	5.02661597990625	3.93660030041628	-0.146235747129219	-0.10661522844655	44.2725370333529	137.00271613845	2.17211168111402	2.58273441627464	0.166534052368828	0.64902700519899	0.365021089948741	0.602991893083224	1.52485823584876	5.51117052019178	2.11288600103325	0.132538431604228	8.91673997840027	5.74176488779567	1.22578355717361	5.74341962221374	0.315556943095295	19.9535852904245	56.3585614882698	87.4156642993601	326.286226088855	0.137715213351406	34.874508487533	126.348004338388	32.6135936198756	44.7942594019849	17.2351399858278
Female	Non-Hispanic White	46	10603735	2016001445966	W	N	1	43	323110131	FMFFF	NA	2	06	311	23	23	1	311	4.45344332900755	2.49518315886937	0.195553517500496	0.0232480723380183	14.7425323963454	87.9432219689421	2.21162203236626	0.816511917408028	0.0451292963400641	0.127415588267625	0.078212868292522	0.135196093752187	0.509122682858987	2.21162223904604	2.14014495715119	0.0202292099938892	1.07462735470838	2.21162223906978	0.308285899981113	2.21162223906978	0.0774179593744809	18.1198928146562	15.4193087707834	21.4575167694813	233.99341588244	0.0367861356896347	9.63626392467096	32.8718144215691	9.68774400589751	11.7961653648711	4.75948664468388
Male	Non-Hispanic Black	155	12600500	2017000064508	B	N	16	21	1216184514	MMMMM	20	3	26	312	195	195	16	312	5.16841194992923	4.31045522221453	0.200600050736344	-0.0223957244028232	91.0178164893742	171.74592861557	3.54784952498648	4.9692610191706	0.206156286189139	0.975935288740388	1.09804181835513	1.27934325308297	5.85516012207258	7.34436655970783	3.54784952498648	0.440454894287206	27.3147909048609	3.54784952498648	2.01632336590677	9.64405486281312	0.505406715376332	24.6543621279206	65.3709998053373	164.824632451636	402.053866599844	0.722244396627105	57.2723992574173	250.244434550602	58.0397862427779	96.779504383097	35.6606654908809
Female	Non-Hispanic Black	215	13701301	2015000938210	B	N	8	100	39840141216	MFFMFM	15	2	37	313	106	106	8	313	4.90808925887619	3.55385989406047	0.277819130295593	0.00568701498121218	46.1399433221414	136.152594327246	2.47601247316366	3.27968202228056	0.195728620038131	0.513567984706226	0.495642754155244	0.512787451705184	2.49543674578472	6.47286305712987	2.38132403876457	0.157493416702534	5.84984176694457	5.66218403532142	1.33523195496926	6.47310986152495	0.293627760550216	18.3757517146707	69.5126221695738	96.0977514485535	324.766555053477	0.164125486443758	37.8323761423267	130.36973574787	35.943690373543	49.0708404950311	19.334360111235
Female	Other	220	14400103	2018HU1220586	A	N	3	21	325	FF	15	3	44	314	38	38	3	314	4.57110669963847	2.687057167292	-0.326077754264734	-0.0383353798335665	10.6013294496007	93.0159812515666	1.64084426110548	0.762400505566789	0.0359490508645336	0.0735179639234623	0.0462636574592746	0.0934408284740309	0.40344997565762	1.64085171520522	0.621290126082804	0.0179244084496959	1.38763338834478	1.64085179375659	0.239434041022181	1.64085179375659	0.0558569459705088	17.5624643919742	12.3556698758298	18.305523236002	244.045068828883	0.0302909889499431	7.47894954454906	29.3269707848414	7.27865680864668	10.2496204642525	3.68285753847246
Female	Non-Hispanic White	226	14202600	2015001423398	W	N	16	17	16494911	FMFM	NA	3	42	315	196	196	16	315	5.0936426798923	4.13076656727935	-0.111035447559543	-0.007967101345894	55.6861309111739	161.689136059441	2.29588910982745	3.03491406863163	0.221390731297792	0.403140519157032	0.813051728628072	0.554597807424418	2.51568458659795	6.23512042570139	2.29588910982745	0.157486937882236	14.7996896413285	6.0045724072928	1.49949683231949	6.24087364740097	0.309532716232732	23.2547127702303	64.3700674572244	104.149196030498	369.455799440078	0.160832334006617	44.5954732816636	148.806053870169	42.8820033307859	56.0899708016521	21.2057386624268
Female	Non-Hispanic White	58	10603744	2015001430877	W	N	18	20	49543121816	MFFFFF	30	1	06	316	220	220	18	316	5.09718312973662	4.16210421954554	-0.019853044501542	-0.0379502842697584	62.9443608487485	157.469666405598	2.65614901675825	3.37211817715807	0.230009462125351	0.378222587010095	0.541874288059304	0.672623842094357	2.16941684829904	5.68373865813315	2.65614901662567	0.212008573971971	17.421839202349	7.09497054354554	1.76336820653446	7.22016160557075	0.35765050187293	22.697601472945	78.4093295341276	117.276501182932	362.200911060542	0.190562438754867	45.8600285901205	159.64542447844	48.043217615239	62.4481453199199	24.051489843359
Male	Non-Hispanic Black	60	10607318	2014000962636	B	N	6	31	237958660	FFMMF	45	1	06	317	82	82	6	317	4.81236951378054	3.24231836776749	-0.0209472158046833	0.0677986460439699	25.0624610753617	131.652800736382	1.76104295790634	1.89938973550386	0.0609739135708344	0.276444403414139	0.148828630359307	0.221347005162683	1.01988770887163	3.60322857857062	1.32555452917147	0.061393683614156	3.69355393970592	3.60323078913596	0.684230947536825	3.60323078913596	0.212983702083094	17.9070258939973	21.9499509337971	50.842075704457	329.376023563147	0.225468990432547	18.1661394545619	80.0216096402359	18.6582553526291	30.3862511221675	10.915146995434
Female	Non-Hispanic White	202	13401504	2018HU0319557	W	N	0	65	303534	FFMF	NA	1	34	318	7	7	0	318	4.20285370779385	2.03513747318947	0.0482544201669	0.0158114854315151	8.03166531680211	67.9427333146707	1.39645483022843	0.177222662132989	0.022534021942986	0.0627243279974387	0.0299027656959714	0.0888848493669104	0.216079669526334	1.39645483022906	1.11854396957019	0.00193699212282693	0.302471940404809	1.39645483022906	0.197845371511916	1.39645483022906	0.033773500670184	15.6341110434248	8.5626524660643	11.7048760446825	192.823125710985	0.019787846892431	4.86667960736524	17.1968681018761	4.63998970080262	6.69944688348155	2.47646125633351
Male	Non-Hispanic Black	191	13702400	2018HU1268050	B	N	0	15	203230	MMFM	60	2	37	319	3	3	0	319	4.11855341015666	1.89415873463232	0.121091303846724	-0.000997644890016965	7.50260308615852	61.4089607627786	1.29825011972213	0.192294636271609	0.0119053299692206	0.06826311186986	0.0226464845110569	0.0826669225580129	0.157151677958344	1.29825011972213	1.17639501219278	0.00633903995425074	0.243911520080928	1.29825011972213	0.139484489507819	1.29825011972213	0.0401321166463744	15.7089834427364	4.4911702110537	11.0718031300942	185.905918450686	0.0453333151053468	3.22485590808311	17.6916238650566	3.35996251270321	6.11808576906447	2.21971447514031
Male	Non-Hispanic White	48	10611104	2015000868354	W	N	12	20	432112	FFM	NA	2	06	320	147	147	12	320	5.04434032255599	3.87463698633888	0.00869124297285371	0.0124284233716977	48.585650461322	157.082123141852	2.38427589041415	3.48894282050263	0.126590819967803	0.484996244326423	0.551093266547071	0.500045973164511	3.26768489586586	6.47849034782769	2.38427589046684	0.193409644862065	9.55332668225626	3.33431849509365	1.20394905475017	6.48113382694542	0.324285752211449	19.3775287317454	46.4129215340796	104.380153722058	376.023058181454	0.468661441229334	34.5843013648451	175.41507532177	33.7828448386862	56.2400795929856	22.4135677965459
Female	Other	228	14701900	2018HU0444350	N	N	17	54	171513114241	FMMFMF	NA	2	47	321	214	214	17	321	5.08979431631281	4.03828788793402	-0.111261097936652	-0.0400792360697387	50.7558453194323	155.978016936031	2.30652867248183	2.97962577520006	0.19103961025921	0.699444587424381	0.249106343851557	0.641317538044691	2.33707619143261	5.48386051082549	2.30652867248181	0.26375562191203	15.2111214842657	2.32729946760317	1.31536050863251	6.26979497164365	0.365175502124422	21.0052956310065	67.0503166380313	96.6292967209856	359.624609810224	0.173108928539527	42.7625722063921	141.871928387592	43.5416814809377	55.9231435372804	20.7371118464341
Male	Non-Hispanic White	59	10606708	2017000008867	W	N	0	15	0934830	MFFMM	NA	1	06	322	5	5	0	322	4.17380468267876	1.9814980506916	-0.174236223055451	-0.047778092718599	6.09373885985599	61.9313547341986	1.05995412755329	0.156760960398457	0.0095948620798154	0.0498251866662119	0.0209619839289183	0.0632087165678486	0.0629561640369053	1.05995412755328	1.05980399055958	0.00414418621086218	0.174698563474052	1.05995412755329	0.120275750471512	1.05995412755329	0.0200122732010364	15.6275627213768	3.85730749641794	8.57505879030516	187.090760520021	0.0338066325966675	2.91672051418362	15.0726593070434	2.83565221180387	4.86387881026663	1.82383244595997
Female	Non-Hispanic White	180	12900200	2014000034270	W	N	10	8	421014437	FFFMF	NA	3	29	323	122	122	10	323	4.95687723134006	3.64329333129898	0.205083935960464	0.00512558966101076	46.9168678883534	142.879671929734	2.34638504507213	3.30066580275433	0.206646206687216	0.38757601564325	0.612189951438053	0.554860848173946	1.97050861953117	6.37750173033233	2.34638504681238	0.196201999687217	6.90167464128793	6.37813582541793	1.16096539274101	6.3781358254075	0.278653151172122	18.995383121332	69.6521985392649	98.521805684074	336.728356816154	0.167024797866913	39.0239673647315	129.584793190922	37.1737325277829	50.0998879535714	19.7523595011184
Female	Non-Hispanic White	227	14500101	2016000502750	W	N	16	26	164441	FMF	NA	3	45	324	200	200	16	324	5.09318897716634	4.13268770453233	0.229144060327464	-0.0499722400221819	78.400614462677	154.967704499842	3.43721969074996	4.01043027377186	0.313298173610722	1.02235672595747	0.56245917247514	0.794422387946367	4.61831637191727	6.86676323203842	3.43721969074996	0.255451165112357	21.717004836095	3.43721969074996	1.9970704182591	9.34333182578718	0.485264734199776	21.809311454157	104.137032842703	148.40219587345	357.876150977227	0.243141808099882	58.1285458132031	209.838699130598	60.0307784576274	82.4355744866235	30.7524738247183
Female	Non-Hispanic White	192	14001202	2015001496617	W	N	13	20	31142135832	MFFFFFF	15	3	40	325	160	160	13	325	5.06948199876825	4.01005346945133	-0.218441623112222	-0.103171620205031	44.3277923137911	143.496461816288	2.02730143101429	2.55510387783971	0.161804415110722	0.458969140150823	0.363726523294546	0.641859216413927	1.80179864921991	5.48934646030517	2.02730143101459	0.125920729580201	10.1017842274666	5.51077664073517	0.963741816453042	5.51077664073482	0.336587233773975	20.8654175620752	59.5007582013481	80.4959648044575	337.817973548334	0.138723251558287	35.0743033014361	115.843177469635	35.4243084580246	41.6987753927249	17.1214715299221
Female	Non-Hispanic White	155	12801400	2014000249500	W	N	5	17	4453626	FFMF	NA	2	28	326	66	66	5	326	4.71735884001292	2.99283887362652	0.155172600932952	0.0405072684024406	23.289706330398	116.497068362106	1.30710657816457	1.77097723764435	0.100771008114651	0.235600694678661	0.204468563296988	0.262613761524408	0.967523497688144	3.55245130114877	1.3071679149051	0.0347277110610695	2.9759646836653	3.55307503473162	0.576699778457297	3.55307503473161	0.149135024018379	16.8174427566641	31.5568587743907	44.1387176160516	288.926984675446	0.0717360164424917	19.1409277178359	68.034709365359	18.6602493260946	24.3777843798987	9.44143507640418
Female	Mexican American	184	13600300	2014000496452	W	M	13	7	61171316	MFFF	NA	2	36	327	167	167	13	327	5.06036242715223	3.9954160470199	0.151834480061685	0.0482695995177357	63.2598297804792	165.443877189719	2.97367263680679	3.80450475460515	0.285561032262473	0.454141503037185	1.10714628531542	0.955972576279749	3.27541486150923	7.49361687474787	2.97367263395682	0.224750526898369	14.8964627446479	2.97367816348221	1.57955683111685	8.08328028354571	0.363366279902708	20.2732999113976	95.5751933619692	133.691151269419	375.871919864306	0.23332064511864	55.9440534906392	204.641778288671	56.6269327752718	71.2968308982459	27.9430010493325
Male	Non-Hispanic White	6	10501200	2018HU0693379	W	N	12	17	1238	MF	NA	5	05	328	152	152	12	328	5.06127138736273	3.92592731721887	-0.077822897077817	0.0494535251261431	46.9040685023633	165.790494923263	2.1115333833681	3.41372031700076	0.12147205414419	0.367919073963655	0.823674983577127	0.616596500804798	3.12768021981253	5.25653151720194	2.11153295318177	0.177872504522847	8.65376254235946	5.73974165682646	1.49136790790318	5.73974165605815	0.384532423247959	21.2132780033984	41.0752549258993	107.356449520119	391.551711149368	0.40213898653484	35.6025515677085	145.296776036388	31.7098434247037	59.9116183609485	20.669358524165
Male	Non-Hispanic White	120	12001301	2014000711857	W	N	5	32	1353936	FMMF	45	4	20	329	67	67	5	329	4.74351663579767	3.03747988948077	-0.104279299815859	0.0239029384181803	18.7876659805142	117.615352359172	2.54822803231746	1.3757352457222	0.040756167352837	0.31141569491177	0.128261261027973	0.321214857845236	0.882232985037467	2.65548229904329	0.976903173127951	0.0487600207030194	2.6881369588498	2.65548467737363	0.546178086800467	2.65548467737363	0.090770883423715	19.2319584703837	14.5954837955026	29.5659516831394	302.668633323335	0.137084169823407	10.9842259248735	50.625229725106	12.211832112931	22.3109263826687	7.3919112221649
Male	Mexican American	150	12801500	2018HU1006574	W	M	0	33	60242535	MMMFFMM	8	2	28	330	8	8	0	330	4.25101585128536	2.12192583123338	0.0876783727112435	0.0195491963950613	9.1121091423649	71.5620601733508	1.55490408154962	0.228443757157534	0.0150346742696676	0.0974594915490831	0.0283437342627976	0.0757782520271222	0.160389267822263	1.55490408154962	1.4256687023339	0.00489915641418453	0.386603932094188	1.55490408154962	0.168743588415368	1.55490408154962	0.0561509323090009	15.9297804890582	5.91440259160589	14.1912805956469	208.512229203878	0.0627769234806949	5.06146600099611	22.3795119114584	5.08853923016166	7.56814352082377	2.98181477034256
Female	Non-Hispanic White	11	10400121	2018HU0830151	W	N	17	25	565221931817	FMMFFF	NA	5	04	331	207	207	17	331	5.09850922766066	4.14321170244502	0.403142237886212	-0.0286107971145266	94.2880011536777	159.158160914821	3.85349620703445	5.10181977390482	0.303397213895088	1.08437772341208	1.46493439693647	1.18344932485666	6.35409851683207	7.47494506218829	3.85349620703446	0.4711948258004	24.911338341252	3.85349620703445	2.6069680989769	10.4748886910003	0.36569698020066	23.4681702246281	121.568225080446	170.970902555044	365.109843574132	0.263954812203977	66.258749212792	229.430494186839	75.2507907039128	91.4757339271661	35.1737349340965
Male	Mexican American	120	11900500	2015000214877	W	M	4	46	206025462	MFFMM	NA	2	19	332	53	53	4	332	4.66653984113753	2.92532075304955	0.0424103620412268	0.0180881949046442	19.447744806515	108.269992282447	2.32481164683186	1.31759145097789	0.0376675367789753	0.159184143158388	0.088770789479393	0.222875469421495	0.36666203404805	2.50735270798967	0.922915993710994	0.0406417046768289	2.5576828730288	2.50758416649581	0.443767317727353	2.50758416649581	0.139610580375948	18.4152917162361	12.6633203797928	32.6945881595088	284.446428140963	0.126563510175533	10.9482650665259	46.9907381476655	9.58253811977573	16.0347756152044	6.55996512167128
Male	Non-Hispanic White	259	14802513	2017000114333	W	N	20	50	202020	MMM	NA	1	48	333	243	243	20	333	5.17363936800538	4.32378046457576	0.422976285262313	-0.0565011530620096	115.210023017591	166.857176330443	3.99812335410746	6.01048433713425	0.199882598785318	0.99168577006132	1.32792170018878	0.751005191550224	5.70723580648458	10.8262967973842	3.99812335410746	0.61753309026678	36.7432048007237	3.99812335410746	2.6924466140425	10.8680260594663	0.832484303340409	27.8160251231944	83.5726566664965	186.275241982747	393.439602529076	0.841915766149804	59.1802791692946	299.15519971202	63.3643817212634	94.7595427889095	39.3255015825564
Male	Non-Hispanic White	166	12400302	2016000401111	W	N	11	26	305711	MFM	NA	2	24	334	141	141	11	334	5.02302867418891	3.81712984865444	-0.248772308453891	-0.0646298959839961	35.4583064550448	142.365654304545	1.75693980729532	2.80766477242404	0.0815941612045865	0.54327718011972	0.344396327273208	0.406660112158689	1.28005438135093	4.77554115917763	1.75693971635808	0.128250004669818	6.16178729579932	4.77585730467409	1.00621757131509	4.77585730467409	0.172318616556486	19.1818571945864	31.7957728740397	70.324710178587	349.279684902976	0.303564881512465	23.9695435528748	114.741094609733	23.7964430340548	41.1703719635942	15.3415837630766
Male	Non-Hispanic Black	46	10602903	2018HU1091951	B	N	0	58	402421	FMMF	NA	1	06	335	2	2	0	335	4.09143051909203	1.84875927889507	-0.162055711262819	-0.0153354330916523	5.40164516649261	58.9149622257806	0.955726407268814	0.14644944416711	0.00928593453342405	0.0393792890159336	0.0168090687911451	0.0505714714970257	0.050671270102545	0.955726407268807	0.92504415071818	0.00383106994281899	0.122014492076666	0.955726407268814	0.111685583303048	0.955726407268814	0.0137365030533938	15.3633862036111	3.29891724686666	7.78154393566841	180.214033863014	0.0306260947771063	2.33332772658054	12.2038218690819	2.45654784818544	3.56326372124743	1.5840457501509
Female	Non-Hispanic White	76	11201114	2018HU1272801	W	N	12	6	12734	FFF	NA	1	12	336	151	151	12	336	5.0607831874284	3.95244579814977	-0.307093579424464	0.0249934873741487	38.2962591359344	161.705483052051	1.76672327079822	2.39897120646857	0.173506239194275	0.248222891326482	0.515480534763526	0.503318774175424	2.830788144023	4.65685647613911	1.76672327079822	0.212175059021342	7.32825803378965	4.8024464109507	1.10987322355028	4.80245176289148	0.23377263220066	20.6764332973241	57.1890704295285	84.977974241554	369.483813450706	0.136453181909269	33.1952210613946	117.438745832996	35.2138300222203	43.6034863726073	16.3193912851658
Female	Mexican American	275	14957001	2018HU0690320	O	M	3	42	303461133	FFMFFF	NA	1	49	337	38	38	3	337	4.56301691465798	2.69343960915478	-0.0423556357431563	0.0171415591811862	14.1693895654259	97.5298489120287	2.14508705659058	0.986546419447666	0.0502866426836811	0.103373410998397	0.0630261569539963	0.187119626119696	0.597043431606398	2.14511673160903	0.794013857090643	0.0262812352183591	1.81053377769496	2.14511674032811	0.371668225806795	2.14511674032811	0.0735199097252147	17.9553837103351	18.019656691952	21.6421385358785	252.874490859357	0.0402644507939812	9.99978331412005	34.6708625694706	9.47197095160142	13.7646833111988	4.98886187834927
Male	Mexican American	149	12600900	2018HU0754900	W	M	14	139	16133614	FFFM	NA	2	26	338	177	177	14	338	5.12241229812162	4.17071354632183	0.126521891678478	-0.0462435477836438	73.4963274276985	160.159268834604	3.1409528774099	4.63027088134501	0.162858500820726	1.1464262789789	1.02209766977445	0.89962262334341	5.17920162381471	7.23558813521862	3.1409528774099	0.430523576278924	18.4118812227133	3.14095287740991	2.08460484248469	8.53799513066948	0.341565880301415	22.3993728324588	60.97839442383	146.761354088242	381.534191197158	0.518792801630618	47.3171247527862	231.420776139794	47.9896728382002	78.1708319379894	29.9595228917743
Male	Non-Hispanic White	191	13604111	2015000952102	W	N	12	17	4871245	FMMM	NA	2	36	339	155	155	12	339	5.07090699363364	3.95806236858312	-0.224150666959525	-0.0374936102305549	41.8424636898447	153.455923642997	1.96282013939065	2.73820145597958	0.102534944803307	0.646907474993132	0.468345948703801	0.477836893149001	2.07844596741759	5.3354598897009	1.96282013939065	0.127977011564048	8.05679016338601	5.33549831743904	1.07185938559921	5.33549831743897	0.318573634064705	20.3175230944859	39.309977136732	87.6751665532473	369.493793996097	0.341808279207729	28.7288502054918	135.38970073055	30.2896125651737	46.6543556708987	18.131246505885
Female	Non-Hispanic White	264	15310400	2017000954874	W	N	15	13	544815	FMF	40	1	53	340	187	187	15	340	5.0974399605679	4.12198790212124	-0.0316803749525037	0.0268843775748639	59.7582661690805	168.060551177655	2.72328797788145	3.36552430459045	0.255860326293405	0.567961564600763	0.619332729386833	0.822746276014628	2.29451821684697	7.27744767894391	2.72328797788145	0.328701934110079	16.4894543849776	2.72328797788146	1.41500627980111	7.40266418642904	0.377164887206979	20.9434252471414	90.8653923526976	126.852777598855	380.321778644164	0.215203580758128	55.4206254772	183.133272347332	48.1059470093379	64.6759950638148	25.8931431877036
Female	Non-Hispanic White	119	11800800	2015000774466	W	N	4	21	334873319	FFFMMMF	NA	3	18	341	50	50	4	341	4.64024133335309	2.83882797638946	-0.177199067215381	-0.0116070236192156	14.3195954319424	102.37415720749	1.42607839614669	1.27111659103413	0.0534378736325076	0.132355615843734	0.0771746765468445	0.21298936118563	0.288161871437157	2.31809025932505	0.853387430081896	0.0375729637287209	1.9922871233027	2.31809025932618	0.365380583811459	2.31809025932618	0.0814448462134408	16.7917085613607	17.4582303705403	26.7163619631761	262.237389152349	0.0416720869382564	11.2676904361301	36.4745429776388	11.3084205594285	14.0847346754727	5.59075526184305
Male	Non-Hispanic White	29	10400117	2014000889416	W	N	17	59	174216	MMM	10	2	04	342	210	210	17	342	5.17589457036417	4.34976401871264	-0.337249766066846	0.0283166931397418	55.2856981794028	182.037236718483	2.1849558775275	3.0080663783769	0.122218870603949	0.616896262604907	0.80775533710181	0.776932064267612	3.61917749956628	5.71361225638048	2.1849558775275	0.268442080686076	18.1637584208322	2.18495669348448	1.33208455807508	5.93932585786779	0.500154141498777	24.3028899796202	41.9781484470784	104.529241555668	419.990610318274	0.46467203567116	41.7129418897286	180.635141415757	38.6084296841501	62.6185233365663	22.9415238130319
Male	Non-Hispanic White	156	13400907	2016001487898	W	N	14	25	2343561472	FFMMF	NA	3	34	343	168	168	14	343	5.11646646592634	4.08487741791464	0.0793344778739218	-0.0608239503723542	64.3419542914034	156.905312067294	2.86127396505385	4.18942888709124	0.158914544760659	0.773909521913816	0.568627032877673	0.937870890632785	3.9680434745649	7.07705458418194	2.86127396505376	0.184696345234656	16.5192881815278	2.86127396505376	1.66949755947164	7.77774902544858	0.419080325773007	21.4871700778204	49.6156457259104	122.713595818435	375.705575842673	0.529414391916707	40.931481180084	219.273411655753	45.2773932910402	71.0522622929635	26.8749145671043
Male	Non-Hispanic White	118	11601200	2016000447642	W	N	12	32	43121045	FMFM	NA	2	16	344	148	148	12	344	5.04795326213185	3.88468548963262	-0.253458715789874	-0.0508283462681482	37.7591101041577	147.987071595446	1.80763501883029	2.50099436646418	0.0785075442420699	0.47865296106686	0.24574177019709	0.473408435004233	1.71178004386228	4.91303073143018	1.80763501883029	0.118960340006487	7.26572587610475	4.9136614241726	1.22095539355443	4.91366142405167	0.293154320729435	19.888680353131	37.3625658505973	82.0847048874491	359.573135760318	0.319331394294991	26.1509223735907	113.968296721161	23.5603602598414	41.3187598331619	16.2494248007742
Female	Non-Hispanic White	47	10606514	2016001445859	W	N	13	72	4616462113	MMFFF	80	1	06	345	166	166	13	345	5.07814699386649	4.04162818907353	0.111726588744091	-0.0106130785589158	63.6471646347787	158.782273588782	2.98758461445611	3.97636640867641	0.283603436720839	0.368038004246478	0.894592602406199	0.866168678382768	3.01585028324447	8.11971779594241	2.98758461445611	0.184004296517073	14.6856857748318	2.98758461445611	1.91233037397972	8.12109696844741	0.332260932177491	20.3038868679425	89.7911419679136	112.88765072543	364.462936510116	0.217003247617031	56.7392939332276	165.292803335887	50.8696257613998	63.1113968743896	27.221596541428
Male	Non-Hispanic White	228	14801400	2018HU1098349	W	N	12	15	10535312	FFMM	20	2	48	346	145	145	12	346	5.03697889613973	3.85489960515278	0.0444208673391626	0.00731252329498407	49.3688901857932	155.1343350689	2.35451805754742	3.34766805734354	0.114069955290666	0.626407070911877	0.494525421838235	0.527026021934998	1.64922648432671	6.36020310797472	2.35451805651658	0.155204620010131	9.43675977752506	6.40024364780771	1.16528130024593	6.40024364780772	0.165199563653439	19.9677263035326	42.9258953225692	107.43852489529	372.52064965201	0.425587439663575	37.2385824818404	158.38700416662	34.7620403542305	61.6100885587551	21.9276649007736
Male	Non-Hispanic White	119	11800102	2015001082157	W	N	14	20	52141141	MMMF	NA	2	18	347	173	173	14	347	5.13289903009974	4.12238986943402	-0.213011361756969	0.0146624058102519	49.8679497926398	172.011517350197	2.24491044230696	3.44252667082232	0.117551087682809	0.94618062520372	0.672688040258149	0.563090354142636	2.61936699510901	5.75842491465034	2.24491044230696	0.272522026494279	13.2346373485274	2.24491044230696	1.57032053588451	6.10229926184097	0.327093345007816	21.2137813841805	44.8939717664824	110.621222554804	402.52008005394	0.413634712757443	37.0063663310757	160.028427315349	40.7301989942732	57.368082486612	22.5905382737831
Male	Non-Hispanic White	258	15520000	2014000020618	W	N	8	14	863510	MMFM	110	3	55	348	103	103	8	348	4.88768626705961	3.41987250130819	0.192062119624226	0.00440444848909638	37.037637336517	133.231832934537	1.87778663910082	2.78161614398782	0.0872424462776046	0.42773299042278	0.392756417925303	0.551111712271298	1.89043040828567	5.10368925640853	1.87778663910079	0.100496264474228	5.4032230549849	5.10435329879085	0.948268778779869	5.10435329878252	0.240210661764297	18.7240924843888	34.3705534439847	83.5182857526224	332.334484000381	0.290896811702047	22.51284492291	117.099419388701	24.0453445304742	38.4759781592497	15.6013313442092
Male	Non-Hispanic White	96	11211503	2016001159690	W	N	9	146	94545	MFM	20	2	12	349	111	111	9	349	4.91430666792459	3.49147601953026	0.359159053185551	-0.0280245531486836	47.0229167224354	132.460185671839	2.34257600380532	3.48597550082887	0.102690868364685	0.574905553162226	0.396293975844592	0.456976019638807	1.99760651379957	6.36768728178836	2.34257600330396	0.154240796842006	6.96140779843573	6.36778177079814	1.25908006890625	6.36778178154329	0.325487235060362	19.0731658892238	38.4464203460503	100.216995980483	330.889834302236	0.378324890804304	31.7070620142058	146.729150821022	30.5250583782397	50.5954492546125	19.3783646393409
Male	Non-Hispanic White	274	14805202	2017000256791	W	N	15	24	44151146	FMMM	NA	1	48	350	181	181	15	350	5.15446797328252	4.18171673012414	-0.2196387518709	0.019886174704697	52.5664444653316	176.682466692439	2.12896379482444	3.10683091168872	0.122494770336651	0.606849077808821	0.583546128020135	0.595983203013417	2.46284753330028	5.76454222212967	2.12896379482444	0.21892035749109	14.4182183166938	5.7871235953917	1.29307441112238	5.78712359691846	0.172132273744137	23.6910936640266	39.6587255679613	102.137168377931	410.690347448748	0.419162143755063	35.9584822334152	171.793034559667	36.5145921655881	61.6560349862556	21.8586220150563
Male	Non-Hispanic White	264	15500103	2016001042921	W	N	8	17	4414845	FMMM	NA	2	55	351	102	102	8	351	4.88441276578461	3.41021159283971	-0.304990397756782	-0.0459840045540469	22.314154210622	126.270794213015	1.21556807199759	1.71119557431122	0.0525762034105623	0.320845482381059	0.193321780826556	0.310707577066319	0.948943195582837	3.22405750932079	1.18606453421135	0.0639692295905	3.42899441250081	3.22405765590352	0.52662695820786	3.22405765590352	0.150955321580487	17.7274034527741	17.8806884340691	43.104170047447	319.224774827283	0.184963409110462	15.5349337313817	72.5260098722145	16.3899911305831	21.0521104498668	9.46552955308737
Female	Non-Hispanic White	155	12700200	2018HU0710818	W	N	18	10	46441418	FMFF	20	4	27	352	222	222	18	352	5.0967651194347	4.16367308006482	0.0694977510302839	-0.00926833576078091	68.9354687231619	161.983873450254	2.96038970885854	3.90752728935753	0.273067238675651	0.735533341677585	0.742838216077835	1.02347263879534	3.71130339726826	7.76244044324646	2.96038970885854	0.374510554530677	19.1424784789581	2.96038972298408	1.41323135457162	8.04717339431258	0.368768473511318	22.2859439136957	93.3406742828654	130.943565263873	369.960785339904	0.201841272825998	56.2064320630066	162.661251925063	58.2188453380389	71.4271248739709	27.3807025400369
Female	Non-Hispanic White	95	11203302	2018HU0972069	W	N	18	58	2240181239	FFFFM	15	1	12	353	218	218	18	353	5.09842665799263	4.16019445562364	0.221795690306458	0.0180730185515112	79.9970809537539	166.750665625375	3.23506156616037	4.13527147275475	0.318916592370601	0.773814990752351	1.31321676103138	0.946391280800716	6.33929256426494	8.54425832526049	3.23506156616037	0.338473072370663	21.1745218711478	3.23506156616037	1.75001234876094	8.79380906923983	0.465468686428035	23.7281479247706	102.251197659033	139.850260233076	378.096397937614	0.256626755292296	64.2799712675504	190.831402101295	64.2449308717169	87.695939932709	30.5791281317913
Female	Non-Hispanic White	155	12603003	2017000622697	W	N	10	37	11531021172359	MFFFFMM	NA	1	26	354	122	122	10	354	4.95687723134006	3.64329333129898	-0.232677651187079	0.0112496684446958	30.2838837057517	143.757363078991	2.50248032618434	1.90776846828746	0.129431231847456	0.230451941345957	0.260315107795034	0.323372601160229	1.89254392646386	4.09817705909034	1.50817853495285	0.107671677936146	4.53617443252299	4.09965430563431	0.772879027300648	4.09965430563411	0.160297542117175	19.0797737000637	41.8120211494074	57.4865346182341	338.278527342725	0.100792805700359	26.1044179589524	86.9072043314672	24.925941177793	32.0713593360442	12.7546103443439
Male	Non-Hispanic White	82	10800822	2018HU1370378	W	N	10	15	13541050	MMMF	NA	1	08	355	124	124	10	355	4.96383737405529	3.64662730837718	-0.138375941716354	-0.00167145106352338	33.3898301356607	142.90297778922	1.6467108876861	2.53838417327223	0.0859418750104302	0.412575597078379	0.32346561723804	0.424353657917313	2.05794841252754	4.39748332226526	1.64669960870721	0.0642768734360972	5.29130801778605	4.47619362327597	1.00561122690288	4.47619362327875	0.311781954923672	19.2768190711657	26.6635955697198	69.1904993193784	350.267920663879	0.290929579472655	21.7858102287197	110.249322571224	21.6112386884642	40.1109599434624	14.4196511974974
Female	Non-Hispanic Black	263	14805914	2016000046286	B	N	11	12	1143154713	FFMMM	40	2	48	356	142	142	11	356	5.04460492915667	3.96699051933897	0.131775241701537	0.00292491207873046	60.2658592042418	155.637539836493	2.86414810100819	4.01263565423307	0.255824792675838	0.5908417583809	0.952131689884672	0.642627564251457	3.05329018857905	6.06052744986248	2.86414810100819	0.401268231268246	9.82397331743609	7.78551639789695	1.7905476468908	7.78556173698448	0.405982201686729	20.0414605246943	83.6662472880294	129.841526752464	359.035693244237	0.21079255835888	53.906132832981	187.371362475918	50.280798523169	65.188838036402	25.708284974991
Male	Non-Hispanic Black	59	10607108	2015000662726	B	N	14	141	263101411033	MFMMFFF	15	2	06	357	170	170	14	357	5.13049834059102	4.13878405515195	-0.335259147241421	-0.0208544045444828	44.8590300842818	165.611376132926	1.91440584035091	2.65176525503903	0.0926974959972976	0.649501512344964	0.578645482829139	0.582722173144756	1.90687892975563	5.18290155657607	1.91440302365675	0.207045267344322	11.1678611870294	5.20187526429963	1.37784592115404	5.20388695155316	0.275912846417721	22.4323857254212	34.9135538392026	94.3210463941788	391.234396163727	0.38343692793559	30.992689374642	137.516200173705	32.004922985328	51.799211617394	18.724507774359
Female	Non-Hispanic White	192	14101303	2017000020798	W	N	7	19	48749	FFM	20	3	41	358	92	92	7	358	4.83305237198975	3.27517916182399	0.287563113256337	0.03245998717191	35.2597566402195	129.737393728198	1.90509982057278	2.90331020853033	0.138084092775625	0.415626469249715	0.294818075706343	0.425404376154098	1.43079588936379	5.17745115133601	1.9050998205741	0.0553432949028207	4.50492410500946	4.83653916454767	0.753161816595309	5.17859822366358	0.273252229963122	17.5080886119691	50.6966089341135	72.205210679568	313.220901144975	0.11981364181935	31.3280631955335	102.25193378039	32.6330642759239	38.0354116137272	14.9179270642734
Female	Non-Hispanic White	119	11801002	2014001148677	W	N	10	16	126510368	MFFFMF	NA	2	18	359	122	122	10	359	4.95687723134006	3.64329333129898	0.0977757583992617	0.000784645285214731	42.143020759182	142.260783473487	2.27886154227093	3.12420538229881	0.199988286804912	0.428949371608684	0.417258708352319	0.601754060126448	2.68468061452809	6.17968561308943	2.27886154093947	0.121657321926505	6.72390124200831	2.56837065944143	1.29937050637629	6.19458791185528	0.24823532781276	17.4930150570275	63.6611367719972	86.0593089214524	335.633850180076	0.150324322129605	39.7843257089362	131.958572967878	36.9028793438953	45.7190249944968	19.1215768115697
Female	Other	131	11703700	2016001455364	O	N	10	58	34510836	FFFFM	NA	2	17	360	130	130	10	360	4.98982810286233	3.78028589206896	-0.127831000677229	-0.0153755643025344	38.5692332040706	144.669602435566	1.967044158037	2.81546216784312	0.175231571246026	0.353411214254097	0.472861544316057	0.527581196026301	1.7417548140554	5.30374801729457	1.96704415803708	0.12060607236328	5.81791916139572	5.3469803905685	0.872280428251229	5.34698039055443	0.207516673647805	18.6077109130876	55.6820474672043	69.7785527888913	339.887211134617	0.139624584482067	34.4913322046578	110.111029785572	37.0241890356843	45.494727964756	16.7143288263459
Female	Other	202	13402600	2016001079815	A	N	15	81	515626137	MFMFF	NA	0	34	361	188	188	15	361	5.10306073800588	4.11227750884766	0.0637969346468767	-0.0081175113084824	65.1097588490084	163.194579266145	2.84296616024763	3.99246254755354	0.277182138893849	0.689826469183394	0.883326420776451	0.90257851598005	3.36792272391626	7.44260385649839	2.84296616024763	0.25242306255395	17.2280577371378	2.84366713810705	1.84631080854569	7.72798325232511	0.426588164642062	21.9020520044942	85.5051880339397	124.058429485048	372.032734630848	0.201997601151759	54.8953444509063	189.993326310115	51.3363396066885	66.904774499707	26.4419118764971
Male	Mexican American	227	14501202	2018HU0081019	O	M	14	65	16148441045	FMMFMM	NA	3	45	362	169	169	14	362	5.10996341090519	4.14829475729019	-0.141836016501379	0.010022793594911	54.9519265774307	167.333061161952	2.44326326531525	3.07723785470631	0.138056510365729	0.865905665780993	0.742746944039581	0.707110850693706	2.91256697009533	6.64012669814043	2.44326326531525	0.284315920263788	14.4269294198383	2.46838667298845	1.88620234663593	6.64147813624794	0.520757684136421	21.4912015653542	52.5987792264257	127.638611292619	394.280884604582	0.495389747575689	40.963339503731	191.315855298123	39.0710316466443	60.3031589175154	24.0833000392594
Male	Non-Hispanic White	47	10603762	2016001485357	W	N	12	11	7301232	MMMF	20	3	06	363	153	153	12	363	5.06444294516454	3.93651406449056	0.244105457441845	0.0288658706832298	65.4063613402468	162.928070127234	3.06149468921012	4.32021679627309	0.163507885037946	0.985653016048777	0.805510938055244	1.01682314220682	5.62348754058383	7.63237780782451	3.06149468921012	0.340242224506966	12.5714013763454	3.06149468921012	1.66503689320854	8.32200534565823	0.30278190712202	20.3641923243453	61.2216880628949	142.923781308394	386.470492188823	0.597496053277874	46.5411244522555	217.06948259979	45.1264930524857	73.7490439576742	29.5794339843126
Male	Mexican American	226	14400104	2014001304407	W	M	17	37	535617	FMM	NA	2	44	364	214	214	17	364	5.13568666502672	4.32518996546099	-0.124101368054387	0.0914492201038934	66.7589651354226	186.258572888258	2.78490858860416	3.77706632365691	0.161353316502637	0.488781818175344	0.911786919437381	0.945508042049865	2.61983700931421	4.89342259112635	2.78490858860416	0.143678324693794	23.10462656469	2.78491108349621	1.82467814761247	7.57016641032219	0.440294896050171	22.9716899177947	67.1179951635659	129.153219147367	427.274139822758	0.629023969034407	48.9362287001607	219.34287318165	47.1629721350407	80.6032142679318	29.7479855420214
Female	Non-Hispanic Black	192	13904000	2017000616268	B	N	16	110	571844633168916578428616	FMMFFFMMMMFMMM	NA	2	39	365	197	197	16	365	5.0935592060174	4.18705580397948	-0.0873191446551807	0.00906611097404564	60.3243996373193	164.453082538296	2.57314114049587	3.59530718706795	0.243593036722735	0.741947519038755	0.704621624853043	0.662761400810308	4.66942220104133	6.39870839423476	2.57314114049587	0.36243248493766	16.3404794984689	2.57314114049587	1.6446358371808	6.99452280421605	0.377912946085922	22.4438751485253	86.236966238645	112.014772721195	374.182413238454	0.19290950445392	48.5790034414604	149.001760520663	49.9964483875534	63.811321873949	24.0706040388473
Female	Non-Hispanic White	257	15151044	2014001016958	W	N	17	19	171440	FMF	20	3	51	366	207	207	17	366	5.09850922766066	4.14321170244502	0.29742755640979	0.0345696290881981	84.8291521313708	169.538299449189	3.49140711420896	4.92708031085291	0.330715126860523	1.15611925988377	1.18633339918717	1.34673075282537	3.57195416807528	9.31668695854049	3.49140711420896	0.336501657218664	22.2743274087769	3.49140711420896	2.43930026666879	9.49062851394239	0.567009905244952	23.296551320567	119.84416537775	160.78878948578	382.827145188295	0.276698349068284	62.8952914696013	239.669333101344	67.7736828872852	87.3620335567173	33.415135455568
Female	Non-Hispanic White	264	15500800	2018HU1325234	W	N	10	26	73510836	FFFMM	25	3	55	367	123	123	10	367	4.96050150281925	3.6531162310374	0.166491110288661	0.0701377921586349	45.5863049480707	153.030813260958	2.2219416576195	2.98505463624124	0.196086532587535	0.735296794361106	0.58686450920007	0.712753661951893	2.56727118413265	6.0383101305019	2.2219416576195	0.188941420573358	6.4468084190661	6.03986363180327	1.34726248010885	6.03986363045142	0.27546777511848	19.5164275091299	67.482611184736	92.2128456685064	354.516148537391	0.153689845424522	40.2512432028025	140.439777929461	38.4524396943205	53.3167966564566	19.6928549683513
Female	Non-Hispanic Black	59	10603754	2016000375135	B	N	5	28	3256753254	MFFFFM	20	0	06	368	64	64	5	368	4.72891848341909	3.0434182496214	-0.107504923061628	0.00529312110336878	18.8387011664066	113.77372465991	1.61206725511785	1.32933685380024	0.0638610268417771	0.229826768121988	0.109184772877866	0.245131848549755	0.645584386409247	2.67973177846463	0.985818514219703	0.0241869264332934	2.26262501514842	2.67973178270462	0.3994525553672	2.67973178270462	0.112694171935723	17.1754052204628	24.4243047312334	30.1716924365878	283.846366877581	0.0577602169992193	14.0523001515909	50.512428214708	14.6164347818496	17.5723058713432	6.99552307972312
Female	Other	23	10400107	2017000030501	A	N	14	51	461445976	MFFMF	NA	0	04	369	175	175	14	369	5.06559253871307	4.06634870266799	0.465938844603953	0.0137614529602479	92.9709935574937	160.670228090197	3.94124247471375	5.37298838688294	0.369355774769367	1.12992673697383	1.06453177213894	0.823706445160949	4.88010829415113	9.99431481493453	3.94124247471388	0.525620272078629	22.3068603870837	3.94124247471375	2.19270423064853	10.7134077964189	0.610700997315984	22.5892600249738	128.394372113252	173.529653074876	367.708285163386	0.293138745492838	77.3627445295556	254.484247675948	74.4066145647421	92.5157467659862	36.2306877947523
Male	Non-Hispanic White	192	13902300	2014000853143	W	N	0	40	03941367	MMMFFM	NA	2	39	370	9	9	0	370	4.26774843855818	2.16137735729889	0.3099976703805	0.000480972733660328	11.8387142247866	71.3951122622704	1.89470834954415	0.293073684539632	0.0199427934594147	0.135942048824316	0.0396075350316137	0.128413177765747	0.341833073173041	1.91919451585549	1.87429669690368	0.0180185662654793	0.64819224331925	1.91919451670058	0.222733730626467	1.91919451670058	0.0715186404530468	16.7679521119525	7.2236152616157	17.991628646033	208.147292369608	0.0654554172065969	5.89653601242406	28.6687686420773	6.24582868268197	9.22829636179607	3.67396730169329
Male	Other	127	11702601	2018HU1325553	O	N	20	63	20202020	MMMM	35	1	17	371	242	242	20	371	5.15662865114319	4.21851056221517	0.0424612397980744	0.00135825097018734	70.8788301860329	173.814198177137	2.64061606956229	3.86126775356846	0.145529991876214	1.05224840171789	0.599238665554109	1.12558682172303	4.3240354782696	7.17793820381989	2.64061606956229	0.26457236774054	23.9886853636103	2.64061606956229	1.55252910394642	7.17793866202743	0.250097528822142	25.8417779483489	53.9788526180903	122.481062011391	405.679761505981	0.516693970728489	44.7191907211855	207.603701928803	43.8773576065702	64.6155478479848	26.7811124332223
Male	Non-Hispanic White	156	12901803	2015000720100	W	N	17	12	175456	MMF	NA	2	29	372	213	213	17	372	5.17625099806328	4.35891627450065	-0.0453224049728771	0.054459635651784	74.7084996544833	186.925591960463	2.87171528419245	3.98305770099812	0.156319077264189	1.05110155054081	1.13856841069597	0.964356314018069	4.39661734903285	7.10061696744979	2.87171528419244	0.444195634098626	23.8258061318228	2.87171528419261	1.83437892259903	7.80613131152945	0.437036752770876	25.0152878196948	60.1327900777525	157.635190903077	428.421225058517	0.627297378611711	46.2534923742363	232.18678915533	50.7474034597412	89.8649436862504	30.7575945018249
Female	Non-Hispanic White	45	10608505	2015001003013	W	N	18	34	21586018	MFMF	15	2	06	373	219	219	18	373	5.09773766436699	4.16119394675329	0.0596033079436638	0.00807401298923195	68.08774593162	164.97792504699	2.92702929736879	3.88995042379445	0.267546239779306	0.506324448370478	0.508693157724735	0.904517966916347	3.46931776276487	7.94961095518278	2.92702929736878	0.285288352651632	19.2802660560499	2.9272875131896	1.59828590235792	7.95649047803049	0.396221907419488	22.2617234111141	86.2797489882046	128.283385265339	375.077692576404	0.205720935324465	59.6394181739762	185.452834967447	56.5109297651966	67.2724641213587	27.4465848740153
Male	Mexican American	251	14701000	2017000329515	O	M	7	32	458738	MMMF	NA	3	47	374	92	92	7	374	4.84462080349166	3.35515132719684	-0.0844587094612886	-0.046565674286834	26.3295693560275	121.274325115422	1.39782508680181	2.13139721180792	0.0616476828074464	0.442438334277464	0.1778678036462	0.338843862956301	0.925437714148407	3.79894107376051	1.39781297342834	0.0528821256912152	3.96094437612473	3.79964959479677	0.749612212244425	3.79964959479677	0.167026859885084	17.8362601332304	21.7512797664424	55.1114857233125	309.70345842031	0.209319928846281	17.2651272558738	86.1427267505256	16.8363279553392	26.343350627073	10.822687772601
Female	Non-Hispanic Black	82	11000103	2014000259957	B	N	5	21	4143121075	FMMMFF	NA	1	10	375	68	68	5	375	4.7469582544332	3.08905296477751	-0.359968939470321	0.0143162792363615	15.3188489136858	116.894817375777	2.35309004941744	1.10034594134607	0.0632983455575784	0.0928488398802261	0.0650128383676591	0.195985651927457	0.345315200950413	2.35307163096742	0.865653743782299	0.0432497041246249	2.00848597415293	2.35309083727329	0.399103732172321	2.35309083727329	0.103947098711253	17.6962775832463	20.9151791927038	29.2909331511498	289.666519038964	0.049548394382366	12.2161392579555	44.2287833801954	12.6704795060391	16.9030098096659	6.26877265520542
Female	Non-Hispanic White	12	10501200	2015000565304	W	N	9	31	930352529	MMFFFF	NA	2	05	376	110	110	9	376	4.91735184435005	3.5197833722107	-0.127741581955367	-0.0143507753365775	29.726585802042	134.693397921737	1.5719101527186	2.23673048827011	0.120212408525078	0.341007793230278	0.282427730355245	0.433898403835498	1.24573939839272	4.27289047761603	1.57191175167484	0.0866261281563643	4.12404043617746	4.27289164216514	0.922588696826723	4.27289164216514	0.202665176068369	17.9111032663267	40.4570697894952	56.7231223530972	322.152562028414	0.105779412635018	25.820020266798	93.3484373342103	25.5022830701223	34.0120572597475	12.65986270612
Female	Mexican American	264	15310400	2016000048992	W	M	3	57	45331544	MMFMF	10	5	53	377	46	46	3	377	4.61303626810893	2.78771794468159	0.193891918598284	0.0653785569884549	19.7195368635968	107.599373486804	1.12593953236488	1.58461509980707	0.0729500983675195	0.233836735845838	0.172188339074845	0.250744216619371	0.522879657160112	3.03349787962475	1.11607085152068	0.0333695927223575	2.55705689062524	3.03349793285576	0.409024930606647	3.03349793285576	0.126257228399843	16.4340078095622	26.7275308481031	34.3767105063316	272.213189853254	0.0601188941673829	15.3846902211223	54.1226370467883	15.2449494120858	20.6296829469093	7.59448615730942
Female	Non-Hispanic White	83	11209503	2018HU1261367	W	N	3	72	340306	FMFF	NA	4	12	378	36	36	3	378	4.56474395286643	2.69596190292437	0.0745220058313651	0.00672015312669804	15.9663584013206	96.6855641093665	2.42949632732576	1.24892333603275	0.0541496695126839	0.162559340631239	0.0857660297622458	0.168632147810806	0.474626916984796	2.42949860640571	0.894136070052091	0.0284800646624301	2.04549837838768	2.42949860643123	0.327395131120215	2.42949860643123	0.0875028796556169	17.8642053113698	19.496197456594	28.1773001140259	251.230917488146	0.0459030847836395	11.9277122703395	37.4063706388055	10.8763770047993	15.9104766858241	5.61351988542609
Male	Non-Hispanic White	191	13703106	2018HU0552753	W	N	12	21	1263843	MMFM	NA	2	37	379	149	149	12	379	5.05145840881288	3.89484117738071	0.110433550295269	-0.0204889040888523	54.8869012787872	153.081353870998	2.57049689979648	3.70503877062229	0.129170386492776	0.698269750167091	0.403963576860437	0.43581121332444	1.88073525074887	6.60980267845876	2.57049689979648	0.176957292293696	10.5561547669553	6.98733499624557	1.72215939795635	6.98733501282656	0.25160683634724	20.3526424727969	46.4960523614239	112.755610478901	368.817165780611	0.454785914388019	35.79190325706	170.169169991903	38.891123240119	58.5685663191175	23.7010845307696
Male	Non-Hispanic White	262	14802004	2015000375347	W	N	5	16	5382042610135321	MFFFMMMMM	NA	1	48	380	71	71	5	380	4.76223002526207	3.07661588790934	-0.0113545339949416	0.0180524262750657	21.4400646998386	119.137996003017	2.59890151580436	1.55592304926213	0.0463654138062529	0.192953670216788	0.118657077460211	0.230886672749815	0.543648724570275	2.92241199891844	1.07509531837051	0.0459170449615125	3.0365959563057	2.92241206767813	0.475235569986948	2.92241206767813	0.158173685210253	18.5369099956255	15.8463556504508	37.4351040214091	305.602655178934	0.170322508270583	13.1391847348352	61.2260389783602	13.0228799021759	20.703311584479	8.21379959630307
Female	Non-Hispanic White	130	11600701	2017000775583	W	N	21	95	5421541911	MFFMM	25	1	16	381	255	255	21	381	5.10547357377358	4.18126055470134	0.0508972610588633	0.0826118704285216	68.865671395078	179.125279086597	2.89180096830377	4.19139464435623	0.287535120432375	0.780599805746299	0.665499015957773	0.928562175484204	3.36153242643193	7.86069526174368	2.89180096830377	0.432802735507964	19.3231397173193	2.89180096830377	1.84790485884225	7.860730021838	0.398218422713658	22.8141117420928	94.6935878572806	133.902945981467	398.950963104529	0.234296342368384	52.2227126403733	207.286805106941	53.5710199328982	79.3606599096571	28.842169535285
Male	Non-Hispanic White	11	10400205	2017000366036	W	N	10	5	12105151	MMFM	50	2	04	382	124	124	10	382	4.96383737405529	3.64662730837718	-0.0602000431706322	0.00822147751173589	36.104852161282	144.323722818886	1.81643588386101	2.66287432773677	0.0874602078382374	0.623627982463192	0.297298874186588	0.666339350547548	1.36507020418041	4.93709425104437	1.81643579100314	0.143381286488385	5.72890743163203	4.86931144840834	0.911337168438226	4.93758440324524	0.342896911232836	18.8767566350499	30.0766514566525	79.0264101013345	352.876467651154	0.332396119584294	25.38273975535	121.907343397396	24.8628486963376	44.9583021395098	16.0244361411045
Female	Non-Hispanic Black	46	10603733	2016000957348	B	N	12	57	45101246	MMFF	NA	2	06	383	147	147	12	383	5.05869829313551	4.01114016022055	0.390229806187273	0.0987413271608922	81.5625300876626	173.719098852382	3.75888672819012	4.87279584151204	0.359522953365937	0.837828581746695	0.887578791034961	0.92831514623815	7.00077088368301	7.7765906441324	3.75888672819012	0.402154353719762	15.5102978451322	3.75888672819012	2.82762319770154	10.2177123546283	0.496329924393284	20.6985868384851	122.259857712762	195.943121963031	389.88590378366	0.294988047555804	75.6793324816175	248.998502245953	67.8891753116299	95.865871935627	36.6384237310203
Male	Non-Hispanic White	119	11802100	2016001227746	W	N	13	62	421341770	MMFMF	NA	3	18	384	163	163	13	384	5.09995324471761	4.04362660322458	-0.225391092464143	-0.113590918835491	45.52381113683	146.402887674037	2.22173796331272	3.05676148990476	0.117202095193692	0.566877917525535	0.696792149794469	0.636431890218053	2.27773603399801	6.02955777563701	2.22173796331273	0.161749513826493	10.8943506984513	2.22173797126248	1.18304490689493	6.03930993327057	0.223371837349647	19.4901801601047	37.2696799365034	94.2237171160523	356.682364853102	0.384933991650635	32.3203040743616	142.981630153593	32.613192481977	51.5152673433761	19.8113687709574
Female	Non-Hispanic White	156	13100300	2014000843877	W	N	13	15	11481344	MMFF	20	2	31	385	166	166	13	385	5.07814699386649	4.04162818907353	0.275286358530668	0.0573955002650443	74.9569948894041	169.956495271418	3.35695681379124	4.7796902021318	0.305009459352701	0.804384432721295	1.12060827703168	0.941238323704529	5.61574207575542	8.01733110255435	3.35695681168766	0.41543095761758	16.6064973469247	3.35695681168766	1.54106407149744	9.12515470012823	0.430529145981883	21.3288529147685	103.811235603655	141.260414690215	383.535159545342	0.254031849734273	63.2222140822042	221.118054716381	64.6962993472246	85.510263487494	32.1877741589362
Male	Non-Hispanic White	264	15159303	2018HU0229261	W	N	14	23	436141645	FMMMM	NA	4	51	386	172	172	14	386	5.12958112232128	4.11483512911212	-0.151293559724321	-0.0418481349855157	52.6434365761683	162.022139153394	2.20344096269789	3.40127298928538	0.117788961167549	0.822323816268427	0.772841527390553	0.598766787346237	2.38700912518665	5.67100183931538	2.20344096263404	0.136846711312546	13.0017125292815	5.9895649757919	1.52291199357717	5.98957352880906	0.169653788879523	22.8914667871279	41.2708612125908	104.907008342469	384.857696898399	0.421300501051956	32.3586532993169	162.764415638573	37.2925449339079	56.3240044110315	21.2002803532732
Male	Non-Hispanic White	83	11208605	2014000059974	W	N	16	74	16177021642026	MMMMFMM	NA	0	12	387	202	202	16	387	5.17647581747962	4.32957844617042	-0.28813702982278	-0.00304063764775945	56.9083122868486	176.520175713481	2.16787349954961	3.23853832044345	0.125491866979383	0.664169344925229	0.598232022974284	0.677705625679004	3.46854141521504	5.88248084714456	2.16787349954961	0.277679346024912	16.5154200549501	5.60445338863367	1.26279141760739	5.89289114022362	0.397905958192589	25.2507532375254	42.509021783046	109.064774960563	410.407386458739	0.429212067775307	35.2416155343987	187.45201452941	36.184535651026	60.5607011785254	22.2427824280829
Male	Non-Hispanic White	275	14805303	2018HU0019710	W	N	3	49	5119373540	MMMFMMM	NA	2	48	388	39	39	3	388	4.58141973972851	2.74559588405011	-0.0148041724272629	-0.0347399190321649	15.3450310514238	94.3187327690617	0.995081237613942	1.28027181927312	0.0305176462124059	0.215897346439087	0.0884695349391936	0.186561730953474	0.451515113785186	2.48788001859268	0.917783235900727	0.0225234781175941	2.55564921419237	2.48788002272868	0.383332785942883	2.48788002272868	0.0937017548201645	16.7661296699009	11.994179978146	26.5368758295228	256.488485441462	0.113799621216666	9.60479743893747	49.4776905229614	8.83679691824884	15.0445272309297	5.86871247408043
Male	Non-Hispanic White	11	10400203	2015001112560	W	N	13	67	1348151047	MMFFF	NA	2	04	389	157	157	13	389	5.07781773225506	3.98013327815118	0.189240415244416	0.0112741709615291	64.6749330823324	162.242463278405	2.93883651419635	4.05462076653266	0.151409836145358	1.14510916358117	0.659665439380301	0.621374738598417	4.77660358507331	7.93281593122006	2.93883651419638	0.323207402479046	14.2476556718372	2.93883651419635	1.52422959487615	7.98858589335186	0.56106342237993	21.0069856795073	62.0526872742339	150.330527641581	385.250138777371	0.567546803618909	46.6901230097446	215.540594923796	48.3423739429894	79.8527049503129	28.3046793734537
Female	Non-Hispanic White	59	10606504	2018HU0037357	W	N	3	12	1527273	FMFMF	25	1	06	390	45	45	3	390	4.61615747790664	2.79057838186164	0.0733784329735554	-0.051545213904962	17.5307558380573	96.0253543107902	2.48846018234164	1.37206783674868	0.0666742220876859	0.188193554362435	0.122761547983522	0.200241639621156	0.307294481755773	2.74018143796494	1.01008579343127	0.0241743651014714	2.28810427613055	2.7401989099556	0.312684025922506	2.7401989099556	0.0988457863310008	17.3905386432387	21.5443239708558	31.9754524726408	249.94318316657	0.0443295902832615	12.6554977535724	47.227408053116	12.1076324569326	15.582078682852	6.29896089961471
Female	Non-Hispanic White	94	10900303	2014000638437	W	N	9	51	416941	MFFF	15	1	09	391	108	108	9	391	4.90952763464651	3.49600555328432	-0.109914314944486	0.0255757672924034	29.5502214629422	139.087523708175	1.80755548480543	2.15195288058069	0.126015451184516	0.267899196994819	0.291458365780201	0.456998220494085	1.23380260869963	4.21882810884729	1.55521991251984	0.0614922928288312	4.05558261806163	4.22748441534382	0.955720430612185	4.22748441534382	0.197560221138894	18.0008576676238	43.4336381649572	56.8099117085741	330.003076832635	0.0940573408247401	27.2037001004046	88.3432629912713	29.0168994839453	31.0753830861922	12.8305576128978
Male	Non-Hispanic White	226	14202100	2017000441005	W	N	11	38	19476742113	MMFFMF	NA	2	42	392	143	143	11	392	5.02974979240405	3.83570517789907	-0.0937480421271076	0.0587415236822317	42.1804623257595	162.145051797941	1.97862937662241	3.07087483304138	0.107891387386369	0.800049195218697	0.654219103592503	0.741766144258645	2.38486557021649	5.26779331393086	1.97862934382764	0.129488630340462	7.03974330357095	5.37847218829709	1.21580689388004	5.37847218829709	0.152534988741605	20.3180212227543	35.7707680698002	102.54938959575	385.076645647984	0.397486944082286	30.6768955564554	121.663372707438	29.6011339973173	46.0552477171565	19.0480987594515
Female	Non-Hispanic White	238	14202301	2017001282509	W	N	16	24	1673636	FMFM	20	2	42	393	200	200	16	393	5.09318897716634	4.13268770453233	0.180625879167347	-0.0126864344784261	74.6875628550732	160.854872059897	3.12192211999421	4.15730724554698	0.303033300307173	0.840424481479422	0.927319716511602	0.92614273691215	4.87293800225845	7.9754097198946	3.12192207571258	0.43578456028096	19.915527280302	3.12192207571258	1.89307616394115	8.48626396818753	0.507716023173216	22.9235833066159	95.1030192709363	150.674013217459	368.025170421373	0.220684754914757	60.2771886089961	194.498378508455	56.9708233582251	78.2783757232795	28.7236475989092
Male	Mexican American	275	14805400	2018HU0713383	O	M	14	26	401440	MMF	5	3	48	394	177	177	14	394	5.12241229812162	4.17071354632183	-0.192642004844315	0.0224740293240443	53.4139282964468	171.551982810583	2.34712569153688	3.50257803023315	0.124780415428774	0.665698473730321	0.444849651920567	0.8244473315751	3.8842213695758	6.3606294363526	2.34712569153688	0.239261145256484	13.5025839963799	2.34712570457579	1.86471165417363	6.38014910972168	0.339162343551695	21.7571657065645	46.8085952651114	119.945273492827	401.713301002712	0.502590340201699	40.2154531318887	172.221389311706	40.4873717679576	62.3935102368612	23.5717902353889
Male	Non-Hispanic White	185	13703101	2017000230002	W	N	8	38	338	FM	8	2	37	395	105	105	8	395	4.89415608993051	3.43811163405893	0.304537444028102	0.0251259128769337	42.2096588725102	136.904281000169	2.05615836783814	3.35569929956489	0.0896676533006534	0.806792010726261	0.248545857959022	0.419446551053095	2.85266984665255	5.42472696074669	2.05560819501761	0.11463759892525	5.93428213404713	5.58772240294784	1.23818752390579	5.58772240294784	0.304157397752641	19.533902799673	35.3549399298796	78.4734063457788	339.181515868283	0.370614577342262	26.2656850092348	133.741397539514	29.7701707234021	48.0062174311673	17.4306075904334
Male	Non-Hispanic White	260	14805906	2014000203389	W	N	20	14	3120	MM	15	1	48	396	240	240	20	396	5.17947555282149	4.32612142014869	-0.0376602580157704	0.0356656836285827	72.8542712836811	184.037811991409	2.68177759567084	3.57392950642501	0.147124007604366	0.954529354982927	1.02186236869096	0.813968983593025	4.90611551582918	7.28981968545536	2.68177759567084	0.40524228846426	24.4641201977124	2.68177759567084	1.70437298252491	7.28982730628059	0.373437936991279	26.1664105932155	60.1348858584266	129.996805066136	423.447624869029	0.571663412373001	48.651728098226	205.186046400089	44.5125214261799	73.5072998591719	28.3898088328448
Female	Non-Hispanic White	256	14803802	2015000774815	W	N	6	43	35956	FMMF	NA	2	48	397	79	79	6	397	4.77774536174542	3.12222256182675	-0.270084112716706	-0.0123382664925582	17.3247904386579	117.378891952429	2.57941044244992	1.23450290033848	0.0698501047837743	0.189310245801865	0.131119122465411	0.209312058472074	0.762741565652425	2.58034836405895	0.949338828672041	0.0325312192901013	2.22103886192471	2.58057048285276	0.348396293595647	2.58057048285276	0.0827359423830881	18.2493225215859	23.2588568878584	34.4603561817356	290.565710351845	0.0567406149793915	14.1290286123675	47.5526583945948	14.4006448231803	18.0418492483372	6.89613276677956
Male	Non-Hispanic White	203	13703400	2014000040499	W	N	11	41	1115238536	MMFMFF	35	2	37	398	138	138	11	398	5.01417082392024	3.79023549183992	-0.152076186713027	-0.00866209755619793	38.0217857678291	149.232982603362	1.89973705736751	2.79941897127243	0.0918561698792179	0.406313105179839	0.46528118917509	0.564879457642459	2.24663962541658	5.04834449030573	1.89973705724631	0.133106572212122	6.69187217501912	3.89935222484067	1.22014934853826	5.16402072134535	0.196464755191375	19.0142358739071	34.6384515191902	79.2289074606412	361.841203705443	0.348974552486484	26.3609671445083	138.977965172227	27.6088781748635	43.6571315246198	17.1850785878527
Male	Non-Hispanic White	192	13904000	2016000436886	W	N	17	33	42144217	FMMM	25	3	39	399	208	208	17	399	5.17616249146292	4.34492601528444	-0.0203335352030162	0.00250375266846775	75.534724681903	177.445983471606	2.86336068775255	4.31527952336235	0.146108225602305	1.11499551633184	1.40347748951877	0.469248343409635	4.75619380526619	7.41674040733924	2.86336068775255	0.515224571537776	23.8266089191458	2.86336068775255	1.66251400663534	7.78342132518674	0.506161220481308	25.3797449636672	63.1354233993131	131.205290095686	412.020699714551	0.574128601971887	49.7324662278299	227.652043122473	46.6187925394652	74.8541290228935	29.4940968525737
Female	Non-Hispanic White	83	11209901	2017000076941	W	N	3	13	304041	FFFM	NA	3	12	400	44	44	3	400	4.61130610220269	2.78079163891933	0.0350890868959647	-0.0382462691092707	16.7078843673457	96.8399710471259	2.47289036817574	1.25365273452515	0.0619908000886961	0.16149821402841	0.120961949645189	0.181817908152382	0.457668762687831	2.48415337030491	1.12368271379672	0.0304964080922597	2.11187742603938	2.48415337043147	0.474502679433177	2.48415337043147	0.0867499016637932	18.282582310875	21.3932855037964	25.2765611570853	251.531769468959	0.0459206062678149	11.624695892741	40.9913823365192	10.8474447651935	15.3448346361718	5.74667687466314
Female	Non-Hispanic White	263	14806000	2016000903649	W	N	9	16	5244079	MMFMF	NA	2	48	401	109	109	9	401	4.91356217759273	3.50810018287935	-0.142045524657456	0.00561968157105414	28.964028346945	136.890571593104	1.98003289693834	2.14759877215474	0.123887832449538	0.248600996393662	0.19301104793318	0.431690342296093	1.55488617357455	4.08519086493692	1.5028608091214	0.123015039669876	3.92977790000773	4.08519110384642	0.728348109704768	4.08519110384642	0.195970710868504	18.2725921957961	41.7081816578187	61.9602833073023	326.085892656863	0.105881970375108	24.235934886855	94.906536907449	24.3541440922896	29.6968261260855	12.2515183472237
Male	Mexican American	118	11703309	2015000659902	O	M	6	72	55586	FMM	20	2	17	402	83	83	6	402	4.79850931058512	3.23919030954758	-0.0170106422248843	-0.0148046730409377	25.0827326539348	119.546406816143	1.34153847891907	2.01876624685413	0.05907632616183	0.384777818750329	0.185041251031415	0.323487083002915	1.08969731022444	3.64106293132586	1.34154395366439	0.0566324818005347	3.75033055618619	3.64667966836425	0.527614929650596	3.64667966836425	0.146355445234283	17.696703245258	21.0296913846301	52.1172579781375	306.388034488267	0.198195824420395	16.7348525320929	76.1145263471408	16.4739005909694	28.1280108735464	10.2757834406728
Female	Non-Hispanic White	150	12900300	2015000140967	W	N	14	22	4614813	FFMM	2	4	29	403	176	176	14	403	5.09176027030704	4.09071924095306	0.361463051504505	0.0460554927148578	85.8140110795563	170.34329156425	3.62632809687791	4.52889346079862	0.359988483785973	1.07431396451462	1.17254998138346	1.04893736167031	5.18262933595225	9.61203171168444	3.62632809687238	0.454072633064263	20.4301550593549	3.62632809687238	2.444011561274	9.85738176975838	0.517814673113736	22.6641607673528	110.210500540204	151.028088567497	384.189626213738	0.280059262719796	69.8725047756594	249.078736488421	69.1063311272466	87.0190714419794	34.8299409016444
Male	Non-Hispanic Black	203	13603903	2016000512068	B	N	6	65	645758	MMFM	NA	1	36	404	79	79	6	404	4.79985530301529	3.20758430461199	0.104057600452701	-0.00895481750470467	27.4301261814495	120.409747091879	1.46418026125413	2.12887312392611	0.0623199038185143	0.279099607760465	0.308001855834578	0.216395465633981	1.08102052074902	3.97194494155524	1.46418021073596	0.0829726714602086	4.10136497770619	3.9800544268623	0.826735038247217	3.9800544268623	0.131093608348029	17.7341118984533	22.3603386556137	50.8072249977133	308.046045799119	0.223253987887899	17.7361385302677	83.8519352898719	15.4108564226183	32.2709961484923	11.2758730112546
Male	Mexican American	166	12401101	2014000506869	O	M	15	181	4345171315	MFMFM	NA	1	24	405	186	186	15	405	5.13782786026697	4.20221211046259	0.0276597790591098	0.0546369491911756	68.7084293402446	179.911454328084	2.78847942093775	4.37189904546377	0.156812470308736	0.866834385967894	0.787997678543648	0.90711199081733	5.33482418771924	7.02097785576031	2.78847942093775	0.234518234952961	18.8772130768226	2.78847942093775	1.95170196015621	7.57987292888649	0.459921901863718	23.6401062974811	53.0508738348699	122.678888524731	416.306810685073	0.520396061390093	47.3580200526498	199.813018871823	50.6222620181505	74.6461354093137	29.0215743597889
Male	Non-Hispanic White	264	15500100	2018HU1160834	W	N	12	21	35123510	FMMF	NA	3	55	406	147	147	12	406	5.04434032255599	3.87463698633888	0.227161728254351	0.0147186968375539	60.4489202234792	157.442296450694	2.90310328779364	4.09297213966802	0.141366587110283	0.907340683700594	0.953714298954743	0.785056875501965	3.58067734096738	6.69525534677546	2.90310328779658	0.30087615143701	11.7978512701611	4.12027356823465	1.74120581008892	7.89145291334916	0.483562799061082	19.8221734575005	54.8872173186716	139.850027170833	376.669509953788	0.54590345215223	43.7163378601968	201.327750802345	46.4248162621581	73.0271447544058	27.3377623189615
Female	Non-Hispanic Black	155	12800800	2014000770682	B	N	9	64	169143345	FFFFM	NA	3	28	407	114	114	9	407	4.94057495332163	3.65326086537772	-0.396754037684668	0.0420706673450326	25.9587003673848	145.859761243504	1.37835854178302	1.97194116669799	0.126395363600157	0.404483643949974	0.171529172407393	0.40375010787349	1.18241324861826	3.74630653750911	1.37835911963686	0.0721519841846597	3.59786503157945	3.74676695400691	0.805220472564622	3.7467669540069	0.166234890386661	17.8329666887921	40.4000016615686	56.5179274706124	341.982184020415	0.0866807477168297	23.4234390368479	80.9967138046399	22.5510409207266	30.4741582295912	11.7843515390121
Male	Other Hispanic	47	10605905	2018HU0802535	W	O	3	77	454413	FMFM	20	2	06	408	36	36	3	408	4.56873848920655	2.7322949152435	-0.126665117894033	0.0236946755885985	13.5397499166863	98.7343751363879	1.86869798084587	1.05982940192526	0.0263716634850815	0.147715112859535	0.0992348678239089	0.110330759598457	0.519279627534279	2.00730966757929	0.75672835082226	0.0169988685724728	2.00959936784887	2.00730966765566	0.375447690839761	2.00730966765566	0.0576623892768958	18.3354151845403	10.3718604584892	24.6181931403734	265.4426422477	0.0959624049678725	7.16778423923129	35.8399724074769	8.04099575113702	13.2390848134544	4.90038943362545
Female	Non-Hispanic White	155	12701301	2015000005562	W	N	8	47	8353637	FMMFM	25	6	27	409	105	105	8	409	4.89570588282145	3.45695126344767	0.140674088628039	0.0569870270359533	36.5114296284514	141.55564771696	2.41234397996728	2.50341773664308	0.177742942962612	0.431532209576638	0.403866066944099	0.50324344413736	1.67567039063305	5.02642093250962	1.88333413307347	0.126408552679247	4.68992569427293	5.11943295084157	1.06309582253011	5.11943295083582	0.26035626353404	18.3865915672715	54.8359291125523	70.7162544484234	334.385362923637	0.130995253724173	30.752710809809	101.261684513905	33.4058486490781	43.8747688818743	15.7439841898294
Female	Non-Hispanic White	180	12901600	2016000195725	W	N	16	23	164758	FFM	NA	2	29	410	194	194	16	410	5.09448311153304	4.1299070609348	-0.316862992229353	0.0184928872822972	45.2880893067148	166.164124017339	1.90196051247134	2.5336580216459	0.174266863464732	0.47332679535473	0.342335379602584	0.52557175738498	2.39785875065584	5.16989424138686	1.90195790794339	0.213948588526954	12.0236788646038	5.11664520473973	1.15449481366431	5.17005761965535	0.238082216612896	22.8112994600797	64.649855463724	87.2550548380216	377.098499727728	0.131270723868123	34.8934775841635	121.879365889692	36.5903807960973	47.5352856889932	17.9306368407685
Male	Mexican American	262	14804618	2016000394034	W	M	7	41	304009717	FMFMMM	NA	3	48	411	84	84	7	411	4.80333611146643	3.25222081680627	-0.265564353078512	-0.0539627302906416	19.8193050204346	115.511879926132	1.082983455414	1.54906704107665	0.0461043348187292	0.330962890406028	0.113281032135132	0.253768342490226	0.473028405850773	2.94013040390765	1.08161456903898	0.05359564844553	3.08271764960406	2.94013322836802	0.443566330906915	2.94013322836802	0.183137328508363	17.1241737357684	16.7420205615517	36.9809304165085	298.599718656604	0.167291116037528	12.3738358258591	60.9071865396356	12.5065706793301	23.0909549616213	8.07424515011847
Male	Non-Hispanic White	83	11206100	2015001477477	W	N	5	6	54252535	MFFFM	30	3	12	412	63	63	5	412	4.72125924038379	2.99537156375719	-0.250827429867337	-0.03534681801869	15.5575201692013	108.409142121663	2.2517522305793	1.26061883461462	0.0325575700991874	0.186550455097326	0.0985787020246475	0.192039717623396	0.55590494906164	2.25176001548327	0.828507731654492	0.0282010169367616	2.31967363896466	2.25176002007159	0.383350949167885	2.25176002007159	0.0587927710673663	18.7807421727296	9.97494150001397	28.7586815226897	284.720564482559	0.112399882004113	9.06780464249586	47.0047189873337	9.38663533788476	15.6197847140797	5.89639360865577
Female	Non-Hispanic White	272	15155002	2017000750654	W	N	18	36	47434218	MMFF	30	2	51	413	220	220	18	413	5.09718312973662	4.16210421954554	-0.183980303757226	0.00951349800124567	53.4167258873886	165.123986943956	2.20089584615488	2.81959242340135	0.21463653459665	0.464111798088589	0.577171432781437	0.825864107575077	3.13930766479037	5.30408841778474	2.20089584615488	0.137272764361783	14.3089172077671	5.98265401343671	1.25967340045575	5.98265517825849	0.272554849950783	23.2704469549122	74.4226639184488	102.463926904653	375.32671906869	0.16233167603132	36.2725886562716	138.453259623787	42.6214839988283	51.1095464317231	20.6513754237305
Male	Non-Hispanic White	58	10603717	2017000250296	W	N	1	23	3313034	MMFF	NA	1	06	414	22	22	1	414	4.45872054651713	2.53082198342214	0.0355065122461064	0.0347376715263308	13.0179411655169	89.4301807995058	1.65246184106441	0.930438715391763	0.0268166681303833	0.170407013766648	0.0967000413510428	0.152070986400586	0.210076979255858	2.10657464181285	1.71720474979139	0.0161680503071405	0.878906881637256	2.10657464196917	0.281879337578818	2.10657464196917	0.0909285754594016	16.7980911804271	9.79309972633146	21.9025913467805	246.452079404948	0.104723298305229	8.24202162510289	36.8392983701195	8.36607647088664	11.651234840961	4.77479648632814
Male	Non-Hispanic White	155	12701401	2017001342173	W	N	0	89	292290	MMFM	NA	2	27	415	8	8	0	415	4.246035420112	2.11931756726234	0.245494193266006	0.050429610088837	10.6420353778359	73.4397270892859	1.81691878392451	0.255849845233754	0.0198598158370153	0.0916383946234557	0.0428409937425406	0.119465228264346	0.148130903655221	1.81691878387785	1.57362895641075	0.0158753672262836	0.529105989474633	1.81691878392451	0.195010934259518	1.81691878392451	0.048632865785933	15.921488423883	6.95931220407879	17.0242974587869	212.602171455889	0.0746094843088002	5.49278674282918	24.2869668238402	5.89086185565658	9.6968970420226	3.55261984590024
Female	Other	227	14700900	2017000859532	A	N	2	24	24223	MFF	30	2	47	416	29	29	2	416	4.50218778917195	2.5674168495706	-0.219145462143567	-0.0471743838917867	10.4674598940167	86.0573044596821	1.5753687315593	0.683387980872883	0.0341468680416171	0.057070626940509	0.0551575961941458	0.116711960865944	0.189704591824876	1.59041223473292	1.06352419553198	0.013277340466941	1.35322621606798	1.59041223473295	0.213970853782277	1.59041223473295	0.0528340778734868	17.8906483480412	11.6736928776818	15.765755775536	230.219794453077	0.0268905622238498	6.86928549003922	22.5168992974703	7.3227305906816	8.76718083682923	3.36742472710639
Male	Non-Hispanic White	156	13200410	2014000648718	W	N	1	25	21128	FMM	25	2	32	417	21	21	1	417	4.44830597329591	2.51171109786544	0.120546859878355	0.0161426103490609	13.9051316817782	86.8731130746436	2.12275736853146	0.907172979529945	0.024549712453529	0.19376388203665	0.0821486863690899	0.0880452815814217	0.383630971790709	2.15429276711921	1.71867972314955	0.0163393746810793	0.980929646555357	2.1542927673886	0.336134903690982	2.1542927673886	0.0701563737012554	17.5454642679444	9.77931825972095	22.2530625031672	241.147877463291	0.0904473110081712	7.98715163146605	38.8813234170138	7.60144616716651	12.3920664065646	4.77786301305611
Female	Mexican American	83	11209910	2017000455621	W	M	11	13	505711	FMF	NA	2	12	418	142	142	11	418	5.01458855384423	3.89324220812354	-0.340584779604428	0.0486147545250202	34.9059544238402	158.096136739921	1.6882696793273	2.39807244642971	0.154761687457184	0.564042843614889	0.338233852507036	0.541422462040631	2.05168312356293	4.58916293610514	1.68826967931227	0.0612747536018183	5.86953163828886	4.58919279081293	1.08084648898214	4.58919279069839	0.243986064611014	19.6755796037878	53.0929093692888	72.0351428012911	363.281097537881	0.116108842604456	31.7487923852016	99.6045247326593	30.470508995483	41.8588386950169	15.3329115510122
Female	Non-Hispanic White	88	10900902	2016001424729	W	N	3	149	330	FF	NA	1	09	419	42	42	3	419	4.60123528663073	2.76087326239129	0.304342788810419	-0.0266332723935235	21.4390934287483	96.9894310420104	1.22504301599326	1.73179143836205	0.0786444618663379	0.144965627936518	0.173896004394836	0.268021233484927	0.475296233487134	3.32984856255683	1.43898739486509	0.0375072205316813	2.82386555286614	3.32993283460878	0.473586507391493	3.32993283460878	0.116018386442861	16.4991664167604	26.1880966966399	36.3673072099815	251.822868448218	0.0610419475564417	14.9506046881044	47.8241394348763	14.5807382409164	19.092587320531	7.71216241608814
Male	Mexican American	153	13200413	2018HU0082750	W	M	18	8	57441862	FFMM	NA	4	32	420	227	227	18	420	5.13725052920949	4.31512172706233	-0.152135575371028	0.0671137106565084	64.2631358362215	182.065086242825	2.48407403218901	3.65923959418096	0.151269998142968	0.880912742509309	0.908878749700937	0.813336052275451	4.19174532225956	5.60060007673286	2.48407403218666	0.327357812868202	21.1159108034434	2.48407403218666	1.9456082087263	6.75241329934319	0.476750860280203	24.8700566100489	54.3187558971406	124.143707993224	420.038799559408	0.561660550381461	41.784614311463	216.017850928468	42.020407292888	63.3205798392208	26.0851868624096
Male	Non-Hispanic White	185	13604101	2014000683236	W	N	12	39	181232	MMMF	NA	1	36	421	152	152	12	421	5.06127138736273	3.92592731721887	0.120445494261255	0.0409947625483121	57.1896427668058	164.394027010813	2.57294357004901	3.52247995894476	0.139911515666606	0.978667038534737	0.727301654916806	0.871695426666317	3.49292528435639	6.38343411373496	2.57294357004901	0.163676621142052	10.45662109157	6.79953096069116	1.69790650003181	6.99398575210309	0.326827127678201	21.2273210468104	51.5427116091213	118.176017467566	389.075541731566	0.529987477987917	40.9596203362163	193.845397751851	44.398323814638	65.5795552771747	25.0267353340392
Male	Non-Hispanic White	173	12800100	2017000195960	W	N	17	11	4517	MM	NA	3	28	422	214	214	17	422	5.17653002430938	4.36181975717704	-0.0315861134699051	0.0247772455495298	75.962032546874	181.509368573735	2.85362926881491	4.12624166847163	0.163404490644851	0.751946387950399	0.880499579372262	1.32342444149951	4.90946912377564	7.66675949995755	2.85362926881491	0.442065229223479	23.6192331221338	2.85362926881491	2.07555090275718	7.75696858470855	0.643880909581312	25.6194468135732	56.9836468650089	154.642288250353	419.076868194982	0.593761666388499	46.8129375837266	234.861835156301	49.0382143056791	83.8522495505833	29.8972504241122
Male	Non-Hispanic White	156	13100701	2017000608077	W	N	5	62	3652831	MFMFM	NA	1	31	423	68	68	5	423	4.74854073106495	3.04756355685731	-0.0493495261117992	0.00455974333434329	20.0496967860011	115.943206769411	2.77616423258264	1.55143928104297	0.037359724488673	0.311822520696428	0.133293108552682	0.218577204345738	0.869486288425998	2.82856970589966	1.04058227244525	0.0454745087090234	2.94521488417465	2.82857831770574	0.556209672845539	2.82857831770574	0.0977749603535303	19.2678866617723	15.43147628916	38.7764462138897	299.435568086577	0.155152950687199	12.3710951229196	63.6981854644727	11.0083351177328	21.3755264508805	7.78963522630518
Female	Non-Hispanic White	119	11703411	2016000825763	W	N	16	56	61615414119	MFFFMF	NA	1	17	424	199	199	16	424	5.0930683395051	4.13202259040162	-0.423229412206354	-0.0790569562785076	40.8045330006305	150.507269180714	1.84537668739746	2.36098219434191	0.158292963703188	0.255405322623936	0.343750937819216	0.461432652696855	1.99961045477322	4.76328621633791	1.75279606957559	0.131735877310724	11.2177842734626	4.65265488200521	0.747082231289876	4.76459370489979	0.235416349592182	22.2796802626964	53.8034888611815	71.6720554410937	350.122454788801	0.127247229545131	30.9128986835354	100.385631057713	29.806051695852	38.3845792704663	15.3423315655992
Female	Non-Hispanic White	6	10500400	2015000296306	W	N	3	16	283	FF	NA	2	05	425	47	47	3	425	4.62576567199366	2.80996509013044	-0.0805689297627451	0.00753219790813278	15.3236312098406	102.852700239066	1.55927340407973	1.11839884129076	0.0593264802687384	0.237955216241092	0.106472194952931	0.152566911625905	0.490648515656878	2.44662844399058	1.07901165337717	0.025914805912899	2.04488289706324	2.44663285787152	0.384503897063269	2.44663285787152	0.076545149985217	17.0250097515469	20.4897917555468	30.356736219038	263.156214972382	0.0520355862580846	11.8247126608534	41.952741132726	11.500209528896	16.1453216081329	5.92144857427751
Male	Non-Hispanic White	238	14203304	2014000904475	W	N	4	31	43029	MFM	NA	1	42	426	50	50	4	426	4.64440029742297	2.85509920718095	-0.32540226885209	-0.0419110676019921	12.5497022265586	99.7322634386453	1.86069574641411	1.0222778551806	0.0236178395228705	0.177251560075161	0.0752467124337505	0.103318107033292	0.347115178924842	1.8606957464133	0.684754387675628	0.00463137316455417	1.90403646084037	1.86069574641416	0.290538117520019	1.86069574641416	0.0703819955559113	18.3338020634316	9.49358755965585	20.5264120799646	267.452192136963	0.0944016356466054	7.0914146111659	34.0771917505177	6.95282677333657	11.7140830240412	4.57685394380627
Female	Non-Hispanic Black	187	13402102	2015001232469	B	N	19	33	4679192951	FFFFM	10	1	34	427	229	229	19	427	5.09762008931598	4.24423266079765	0.016375309746586	0.0489189114011329	70.8530469277896	171.835736598804	3.06872414855466	3.71045684646762	0.310904650561099	0.86629249840822	0.91398795475563	0.828049146566219	2.77768563979152	8.32783493883259	3.06872414855466	0.133029588441759	19.9690161124104	3.06872414855466	1.62741012741013	8.34165708936287	0.55268830358167	22.0887637656062	97.637992456969	137.006307076367	386.711399551427	0.231006992140762	56.6994778872063	205.172778556318	56.9781767485768	75.3280455545077	29.6677652581208
Male	Other	190	13500806	2017001169275	A	N	7	21	53373032	FFMFM	NA	2	35	428	94	94	7	428	4.83181711095621	3.27065028157558	0.206239105295759	0.0270755454861566	32.3589093142598	128.881407064573	1.66124149442472	2.48446639990874	0.0718599956071797	0.435803579015522	0.176966865001499	0.315804899406026	1.7411069732037	4.51572232910148	1.66124150081689	0.129266530734755	4.70986793183714	4.5157225669768	0.970935612338501	4.51572256697645	0.265408296167811	18.4787509217047	27.5928944737128	68.0822675834351	324.162002759367	0.276944407338665	22.5779542156508	102.86355736047	20.9082520901527	35.4730954919941	13.4627842474918
Male	Non-Hispanic Black	149	12701304	2017000033980	B	N	2	32	247730	MMFMM	NA	2	27	429	31	31	2	429	4.53285666147665	2.67392880602499	0.0624576840810942	0.0101838264741815	15.4311237110855	93.9760993730237	2.3026588776887	1.20528432208091	0.0296556541374405	0.192858522790257	0.0625515699975092	0.128714116649367	0.370472239107991	2.30266666801124	0.84796713978255	0.0186600367443526	2.35948346774018	2.30266666801265	0.31679748672697	2.30266666801265	0.0736474404285638	18.2163331580899	10.4781529290635	27.2763862121996	255.789354805962	0.113968517845627	7.98646466572216	40.3623436177048	8.62096694919696	14.0835252183867	5.41700289478486
Male	Other	191	13704700	2016001336685	A	N	10	20	8444010	MFMM	NA	3	37	430	127	127	10	430	4.95879369715288	3.65327357714378	-0.277106947679954	-0.0478635253792331	29.2583975869695	135.765641060276	1.53302171381287	2.35808358916977	0.0663953075369299	0.28185539642243	0.179508438989811	0.444473535506672	1.06532769816486	4.11904885525297	1.51532930514281	0.0777178957136096	4.7906522905576	4.11909206774745	0.791601755443145	4.11909206774745	0.198057910347803	18.3082680878652	26.1281387952358	63.3034615767196	337.063566045199	0.246220368256616	20.0364539699085	99.5312870860823	21.4381010275903	35.1483915612514	12.7690573387906
Female	Non-Hispanic White	258	15311616	2015001408185	W	N	15	28	43131516	FMFM	20	2	53	431	191	191	15	431	5.09587906477388	4.12756551488442	0.0820341536931233	-0.0600524609685351	67.3295802674586	153.826693803902	2.79028939463953	3.74638364323255	0.238089122200099	0.636619349710967	0.778006054734805	0.720097268308911	3.73004750964867	7.18601370108731	2.79028939363245	0.382322983294104	16.8534772298942	6.14827823220945	1.72663786762187	7.58479295470369	0.398102525100881	23.1299631576235	85.5610899756702	113.385471058896	355.898073531324	0.198303690985913	50.1081372547698	146.109939989242	51.1947429614728	68.9429846080759	24.8264654947169
Male	Non-Hispanic White	222	14800400	2016001091714	W	N	15	68	1531	MF	7	4	48	432	183	183	15	432	5.1581249157031	4.19695083591377	-0.0283681993300261	-0.0153967440074026	64.6237917664712	171.182146138579	2.61016108204718	3.8503534046891	0.139886577228245	0.753046011970229	0.652735369511614	1.05624702568616	2.33083422362652	6.83262335205294	2.61016108203625	0.342478653574694	17.9196072522048	5.67370478857805	1.78534634184475	7.09515343864848	0.43340228734044	23.7585454442745	53.0052806012237	126.794176418761	401.063607044541	0.527513856351276	39.3694023298156	209.117636744555	39.5781810080246	63.8652677870114	26.1710154632185
Female	Non-Hispanic White	264	15311401	2017000341135	W	N	11	24	11144542	FFMF	NA	2	53	433	133	133	11	433	5.00281380081964	3.75867284661383	0.544136441473834	-0.00846280772591283	73.9071287476809	147.577135715981	3.45335369946597	4.38738972542093	0.307551023835153	1.13733466696529	0.965370361664146	1.10011733925993	6.9959121821946	9.26121747377234	3.45335370057476	0.385229854493512	11.7319513908075	3.45335369946597	1.96620337165785	9.38718860735453	0.472557496830091	20.4015519925196	96.056682872785	146.383520938512	344.997672805889	0.233124375067283	60.7349809629301	185.138269335456	64.1811735708457	79.8864720450147	29.7849747422842
Male	Other	131	11800300	2017000313122	A	N	4	17	9843589	FFMFF	NA	1	18	434	49	49	4	434	4.64649386381415	2.85134062118831	0.304717584840207	0.0451382959643171	23.4778683726568	109.030990657641	1.27196363041817	1.86940096998524	0.0493789535235613	0.271411655676515	0.096830460341485	0.28632898935197	0.964092434101575	3.45754377290756	1.27351689053855	0.042386421677113	3.53661962643391	3.45754553063327	0.634633482717715	3.45754553063327	0.128392313803129	17.4542821738814	18.1991792536482	38.9557357338271	285.944583153774	0.18366350415059	14.6475484959652	64.6097789084334	14.8904834656133	24.4143958722302	9.09275121090539
Male	Non-Hispanic White	11	10400132	2016001217773	W	N	0	32	270153639	MMMFFM	10	2	04	435	4	4	0	435	4.14758174882371	1.93217879733033	-0.0604578246232685	0.00586871070945552	6.49947219416584	63.6532547960344	1.11991820884712	0.172818556577101	0.0109141619669354	0.0755309498034446	0.0233376363380045	0.0392017953868845	0.105587846472489	1.11991820884711	1.10151300054947	0.00166065013911443	0.182547905572791	1.11991820884712	0.142180684725467	1.11991820884712	0.0386519542358891	15.7756138085863	3.87819078583043	10.1651315349209	190.978671001987	0.0376291399785227	3.12524116032307	14.5972337764219	3.20197172546778	4.71543552408274	1.96705588910361
Female	Other Hispanic	227	14500101	2018HU0188068	W	O	14	25	474614	FMF	NA	2	45	436	174	174	14	436	5.06493058161773	4.06964856218148	-0.174119846446973	-0.0261913393266172	49.1820498133038	154.275388477895	2.10067579194152	2.81585992754475	0.193187131355482	0.45623062810918	0.481401059799032	0.611595517387659	2.52424828821298	5.68992871562775	2.10067573437023	0.219667147628866	11.9431667442642	5.69273615092308	1.43206447987491	5.71022867622347	0.253877771028955	22.4124900900273	64.0843407906874	92.1856099075475	356.676375133006	0.145324888266045	34.9177123451032	128.002330203842	36.0624071546711	48.171427355923	18.731535156626
Female	Non-Hispanic White	221	14501204	2018HU0267140	W	N	8	8	3382	FFM	NA	3	45	437	98	98	8	437	4.86039674882819	3.35800716284939	0.3404884418358	0.00423167341315604	40.3865013722239	129.622764725803	2.1046098699199	2.7969384056729	0.162957527595771	0.267616167921009	0.375052891674175	0.529074770039845	2.40968294021897	5.6896182335685	2.10461748162492	0.156229013821468	5.17457140758974	5.71585353841219	0.8310025957258	5.72092276539873	0.24824591116894	18.1895428930907	55.6407672843383	74.866522587392	313.013319321989	0.139480339893646	31.1531181266072	113.03211581016	34.8618254031386	43.9950449960913	16.4692730315362
Male	Non-Hispanic White	119	11703412	2018HU0116513	W	N	12	27	49144212	MMFM	NA	2	17	438	152	152	12	438	5.06127138736273	3.92592731721887	-0.0728627209082176	0.0405631869325674	47.1372988989464	164.32309386499	2.19240526574185	3.17251376977952	0.117877302811049	0.609620574893636	0.593500447366109	0.728188262718618	2.72243439858063	5.23897674694713	2.19240526568592	0.209294787659711	8.79095969265414	5.95399646328253	1.28915136233018	5.95957539132602	0.316822969959273	20.5002671422334	41.5098544631225	101.578922484527	388.94962547369	0.3985252528821	35.7728901023995	163.128941380424	31.6712281684517	55.330192142688	21.3183801743771
Male	Non-Hispanic White	191	13704200	2014000346828	W	N	18	22	133618	FFM	NA	2	37	439	224	224	18	439	5.1809471613954	4.35861259609545	0.0339238466726735	0.00292441977620251	80.845218409235	178.372057795461	3.01643282756139	4.36883345672612	0.176916044342483	1.06645368346731	0.814289824312942	1.03185635195389	4.91956291987707	7.89532245698746	3.01643282756139	0.184732499859954	26.0317081318841	3.01643282756139	2.0313015137161	8.19951449524759	0.597379694848143	25.8015974599354	65.3106352251943	150.997477045117	413.632373614425	0.642927987555471	51.8151940716484	266.678570903904	52.7723867794237	85.2653098110096	31.1923567578172
Female	Other	264	15310400	2016000736620	A	N	0	23	25025	MFF	NA	1	53	440	10	10	0	440	4.28004806890776	2.15564932651906	0.0810858653784048	0.0183644057641093	9.36271387053698	73.5828862317556	1.5617469902285	0.219914864694482	0.0293795076796225	0.0257776107668548	0.0259971410586861	0.110727367586881	0.207162962974163	1.5617469901502	1.56167097943215	0.00942701246025004	0.409654170251617	1.5617469902285	0.210083253399997	1.5617469902285	0.0531084907682712	16.2961703391011	10.5025033206073	14.4115877523971	204.707838120182	0.0229795750534771	6.13617289129511	19.0041783154381	5.95818780431637	6.69481943357845	2.94029344854219
Female	Other Hispanic	130	11600701	2015000267368	W	O	5	48	26526	MFF	NA	0	16	441	71	71	5	441	4.74592631534795	3.11568485319618	-0.426713958021235	-0.0391778832573392	14.7165232798367	110.691652690755	1.04113294524446	1.18804991385039	0.0623756424980109	0.232629595396355	0.102004204145656	0.225499815070574	0.654287854374817	2.40207437404518	0.883674276337447	0.0487768998862845	2.02527489778697	2.40207437413499	0.341829216103178	2.40207437413499	0.0935484274357436	16.6537965020673	22.3139435230113	29.4205598443876	278.059675511036	0.0524626288243646	12.877397820281	41.8024695448399	12.7866155900014	13.8711548906537	6.14285110205059
Male	Non-Hispanic White	275	14805307	2015000460273	W	N	2	20	2393628	FMFMM	25	1	48	442	25	25	2	442	4.48724716050542	2.58211745896725	0.101759872109249	-0.0451019552705127	14.6417543071351	84.9569965251892	2.16429545215089	1.13167196309077	0.027592644556426	0.16508726307373	0.0535327862940822	0.144666668782719	0.454100118846147	2.16429529029341	0.835952766085291	0.0247015818992483	2.20048327585339	2.16429546306482	0.317531349794164	2.16429546306482	0.081337409516012	18.3895477068952	9.13453339697405	23.1758150585384	237.147618698001	0.0892295818777932	7.51772394461478	38.6955394739499	7.26732110401068	12.3373888126299	4.72042219694773
Female	Non-Hispanic White	185	13701201	2014001342863	W	N	12	14	49121215	MFFF	NA	2	37	443	147	147	12	443	5.05164388874217	3.91603088838066	0.481488088261176	-0.0497338494816155	81.2490376345484	148.696904959845	3.8447572540999	5.45888642954194	0.368433059239375	1.05517514588568	0.791542342986132	0.992664905510994	5.02366186647738	7.86471648795439	3.8447572540999	0.214318019271794	16.0894011668401	3.8447572540999	2.2319662245606	10.4511337786549	0.646116330024349	20.1324232623288	119.165495731968	161.378815521997	346.959117548763	0.286533912952465	64.3928804534193	225.3275017389	75.9404529882976	85.7137039905584	33.3493396017927
Male	Non-Hispanic White	156	13300600	2017000184272	W	N	14	15	384014123	FMMMM	35	4	33	444	172	172	14	444	5.12958112232128	4.11483512911212	0.0435734979432382	0.0308466959161892	63.9696419988659	174.238982276335	2.79470297391648	4.33218447784963	0.144613637532532	0.934341700346483	1.00846410942454	0.923735590750272	2.68539354674851	7.59192551002731	2.79470297391648	0.325134924849578	16.4407826751465	2.79470297391648	1.96774872897795	7.59679030993745	0.437235901082874	21.8896031513571	55.8133562898114	138.394028223365	406.423114424981	0.530217489371789	42.1436727635257	235.106976374434	47.4438216397478	78.6628842145118	28.3957971637973
Male	Non-Hispanic White	83	11208618	2016000763179	W	N	6	29	863640	FMFM	35	3	12	445	81	81	6	445	4.79861297666877	3.16378580221249	0.0366766786283351	0.0445723277635083	24.5438786463204	126.872837387903	3.0882604063562	1.56083141529649	0.0502612382547761	0.323024399679415	0.170326457272231	0.277950286841685	1.33746708430115	3.2435647704448	1.19324317061796	0.0829724601389923	3.38828733587075	3.24357122762344	0.607266418851198	3.24357122762344	0.162918798934229	19.5685151234094	19.0991677159095	43.3768542070225	320.365613359693	0.184451256075554	13.6937329801362	73.1707164781488	15.7965251340587	23.6501589040489	9.55685200605657
Female	Non-Hispanic White	227	14500900	2018HU0965951	W	N	4	84	483130	FMFM	5	2	45	446	48	48	4	446	4.63057981741415	2.81960584354922	0.0450007946046105	-0.053593333541233	17.5421514341551	97.2209753407826	1.00988002792566	1.31949671556356	0.0667087537829835	0.148000111395922	0.084491820317951	0.189829538371594	0.436077235617923	2.74169207835112	1.02312275425064	0.0394644631487081	2.31396727551479	2.7416928886707	0.439169788011677	2.7416928886707	0.0866349161943877	16.0750575802818	21.5018156139525	34.3641974274415	252.273619366334	0.0507841796706024	12.8475887846223	45.5733533682618	12.1072529283574	16.273317080013	6.36115781828248
Female	Non-Hispanic White	84	11303500	2017000496683	W	N	16	13	19203371316	MFMFMF	20	2	13	447	193	193	16	447	5.09494728109551	4.12928871908491	0.0430095175975485	0.0415444478465089	64.8643545743732	170.117900486602	2.70986366287346	3.6947899129646	0.252069922533872	0.708398447531336	0.543551860625981	0.609553633430427	4.28796776456201	7.3634781769837	2.70986366287348	0.282738049513846	16.9566155109871	4.26443960313022	1.77121092548734	7.3661731523904	0.372419424186672	22.9363904033381	84.4253812061504	123.38586642583	383.808305457021	0.212159669555809	50.7779005418815	163.052104576325	55.1327020015963	64.7225677430627	26.0017045116755
Female	Non-Hispanic White	154	12501900	2017001179305	W	N	14	14	2212143834	MMFMF	NA	6	25	448	170	170	14	448	5.08398723169756	4.06273936332503	0.134095823445804	-0.0209816035092511	66.4756148727791	158.064887355798	2.98225474738512	4.36370974398654	0.270546124323279	1.05436848777334	0.92649662684272	0.745687397162762	2.47748342919072	8.09876300522165	2.98223434239638	0.302688947417855	16.6617630199104	2.99656767834357	1.74458369876775	8.10655339841842	0.462124387782898	21.2905403266742	96.8474760012689	128.018312808395	363.227241425517	0.209466968442209	56.8205213257384	190.287166418911	51.4056218347028	68.147415178654	27.0807188368269
Female	Non-Hispanic White	47	10605912	2014000160968	W	N	11	82	1116215372240	FMMFMMF	10	0	06	449	135	135	11	449	5.01052682202006	3.78112392641242	-0.326754047263126	-0.0499091175099675	31.6383464181564	142.681903937391	2.2910202809682	1.95189491853172	0.133391908160491	0.222030734355164	0.342947043539317	0.39328427799209	1.27097380618126	4.31868027876037	1.59561128289439	0.0795543002118068	5.48018562254506	4.33732115557599	0.705924165493479	4.33732115557599	0.209916562122633	18.8283546458179	44.907736395452	70.02968310902	336.378732449021	0.107444186592334	26.2714836439636	87.3518101781356	27.5235615149857	32.5631599131318	13.4182425205341
Male	Non-Hispanic White	156	13100802	2014000484547	W	N	13	13	3373613	FMMM	30	3	31	450	167	167	13	450	5.1132634253837	4.07727299623769	0.262053690515726	-0.0429179923734244	76.655908519754	159.229320908099	3.38611502384003	4.68062300997932	0.17319418231928	0.960450352565462	1.39663784115093	1.00302748011169	7.06216159372425	6.7537223699777	3.38611502384003	0.374522552790375	16.8467490155776	3.38611502384003	1.93835107392978	9.20441493837651	0.518005009163267	21.6383061355141	69.6266104395623	158.294233864197	379.871478778401	0.633525184203487	52.7058498610191	261.629502434103	54.3548827534863	84.6456033562763	32.1572130354968
Male	Non-Hispanic White	116	11800102	2017000228489	W	N	20	31	202320	MMM	NA	2	18	451	241	241	20	451	5.17745272545111	4.3251608002481	0.095371828867097	0.0846492546385573	83.1405566483326	192.886509080115	2.89587735075659	4.13044218927658	0.163944517281833	0.983897984051506	0.799833222413257	0.871812477880905	7.34636000773647	7.86268035494621	2.89587735075659	0.450139698265934	26.5012102025907	2.89587735075659	2.57055055063865	7.8718107675801	0.688417091065585	27.7099716521526	65.4960405451862	148.204525990778	438.627437962769	0.630728469894037	47.5629568925133	253.560402203639	53.2023214259608	89.481784473682	31.7552815754193
Female	Other	263	14806301	2016000092238	A	N	5	19	152526	FFMF	60	3	48	452	60	60	5	452	4.69263234095485	2.93778099760206	-0.0642737335967433	0.0452913846797098	17.6989844814652	114.196851368131	1.78310189464485	1.31324491753756	0.0711423850363994	0.231318349845041	0.121403976160829	0.243209162280436	0.652880153429046	2.80549668490405	1.03226662113428	0.0420603744261179	2.36737053680282	2.80549672080036	0.453788056678769	2.80549672080036	0.112166037395705	17.1487735278551	23.325949422297	35.7377426154369	284.637722037053	0.0558325759637163	14.1501447623868	47.7046825394035	14.4855273758648	17.4834084053438	7.34425499437382
Male	Mexican American	178	12200300	2018HU0147631	O	M	9	42	4093710	MMFM	85	1	22	453	112	112	9	453	4.90536448829757	3.53684087810232	0.00426829316236869	0.0208548231383421	34.5051701166987	137.857330226115	1.78505793442045	2.39352117059716	0.0811277545600286	0.524174106641446	0.241531114810036	0.441838502471542	1.62442205654816	4.85222734197544	1.78505793441998	0.0292156464897071	5.31362672301891	4.85229054588047	0.974989028923266	4.85229054588046	0.0738287660406065	18.3299957628488	29.2836015013754	69.8203865347456	340.95086997758	0.3052685439151	23.8937616428744	111.68695370806	25.5668231040679	39.9597286336052	15.2154263925218
Female	Non-Hispanic White	47	10606103	2018HU1132366	W	N	9	23	4653129	FMFF	30	1	06	454	118	118	9	454	4.94348709537708	3.60396046343082	-0.151130413037339	-0.000897162262419194	31.5896662717187	140.132714334935	1.64837530882131	2.22966846061121	0.149945564425937	0.512725247513059	0.285482007269458	0.447691916193196	1.76970899154014	4.4044806599242	1.64670479083402	0.0952253790518653	4.32548726236782	4.47620720369212	0.797259951513401	4.47620770974706	0.232904849703193	18.1835637116372	46.5697475719571	66.6151418458995	331.86122234202	0.110416045255208	26.9058767520236	88.2389546423479	26.5459168702001	35.6497552863868	13.6619366180522
Female	Mexican American	262	14802307	2017000378368	W	M	1	17	12727	FFM	NA	2	48	455	22	22	1	455	4.43783733046071	2.48465536359742	-0.0296397908361399	-0.0144223455831739	11.646614917421	83.3805430077552	1.84931144736491	0.769708593872231	0.0388192983679517	0.0679284531997759	0.0386833026471196	0.124854876492176	0.366910382848879	1.8493114473649	1.4106513865254	0.011714672254498	0.741489859567262	1.84931144736492	0.248221994922105	1.84931144736492	0.057983324974191	17.1192265846817	12.8485162412201	16.9272762672904	224.827999984927	0.0314503948820996	7.33455073155844	26.1033977058381	8.18325202414197	9.7837461730801	3.823895205671
Male	Non-Hispanic White	119	11703527	2018HU0211967	W	N	21	31	17512147	FMMF	20	2	17	456	257	257	21	456	5.18527516970957	4.35141991279146	-0.0910698459107663	-0.0489609512357696	70.8347760235817	170.087705458481	2.58040125422711	3.87864401645672	0.136879465907082	0.789154962535104	1.20044567904887	0.72934452472104	5.24318224986509	6.9804624439449	2.58040125422711	0.394665549754709	23.6220154606098	2.58040125422711	1.62056638766183	7.01425783566067	0.312791620482396	26.4510702192316	56.2234021206864	134.162447626679	399.138937622459	0.522163965624243	42.112325604094	203.252883710849	39.1867655981624	67.419779516069	25.7484653812967
Female	Non-Hispanic White	154	12101703	2016001491137	W	N	5	34	5039539	MFMFF	NA	1	21	457	68	68	5	457	4.72704345200168	3.01238917870827	-0.259085270757482	0.0101283872096194	15.6943991701253	114.111020577556	0.982901152526427	1.29463375624242	0.0711631077890007	0.173025818510017	0.099853290977384	0.261797268153581	0.472322610978765	2.64471513105988	0.972936330023438	0.0471430567163589	2.24755264197442	2.64471513112974	0.304845846204542	2.64471513112974	0.114405297651895	16.1309622993349	24.4259090767778	32.1554377564497	284.477255856875	0.0540682805449604	13.7225556329879	44.2159314189486	14.0723678764404	18.4124000682517	6.91945639291425
Female	Non-Hispanic White	114	11803300	2016000875160	W	N	15	13	0151637	FFMF	5	2	18	458	183	183	15	458	5.0977988004299	4.11331732617533	0.0455464034426977	-0.00121313741278804	63.9987613725208	163.46283620748	2.78939744896153	3.60408024472149	0.274652950843937	0.849167487161594	0.4784956553514	0.849545134008344	3.66040541782146	7.57848058455486	2.78939744896153	0.241999792435891	16.7298252534015	3.24169241698703	1.73590258477672	7.58236839785458	0.413607965384719	21.9435792293949	88.3393577338235	110.786787585792	372.491297064322	0.214964992596584	53.1797161992843	177.285267337924	48.1132318137273	70.8499114718432	25.9756568447898
Female	Non-Hispanic White	252	14701400	2017000312253	W	N	8	5	8457441	FMMF	NA	1	47	459	107	107	8	459	4.90520808887718	3.48345118513833	0.419599525846422	0.0104762552800522	49.5533918239281	136.412631054011	2.7912641231587	3.65480694184051	0.213670570523893	0.502224818087589	0.54632003837272	0.774031072788429	2.38964044684383	7.48828434068152	2.79126412321213	0.13185862038244	6.84603261532557	2.79126435474026	1.33640147474751	7.58744254248102	0.416741194914696	16.7530286098616	76.7416284713498	116.417730751686	325.231645822367	0.172793008316744	46.0738729572175	163.087854914321	43.8293235158888	53.8884279168453	22.69518561172
Female	Non-Hispanic White	228	14801300	2016001410936	W	N	1	17	526120119	MFMFF	20	2	48	460	21	21	1	460	4.43201250907458	2.45247314296374	0.0173416445475525	0.0911502429891677	11.8202573896065	92.1265110055762	1.85154693071527	0.705704623920554	0.0377312567742179	0.0896565824349087	0.0641731914132999	0.145948286523428	0.280730044829624	1.85154721901615	1.73952511243367	0.00491730119516402	0.691483952289359	1.851547247933	0.219489307668002	1.851547247933	0.0562969029453424	17.3534814765034	14.7525458505332	22.0215427873632	242.292697896388	0.0339641527396214	8.73343285083237	29.8469652687459	8.94455615421533	10.9213151292326	4.12591856083068
Male	Non-Hispanic Black	130	11600800	2014000772692	B	N	15	18	521547	MMF	NA	0	16	461	186	186	15	461	5.16061179514264	4.27831369636551	-0.107536997454887	-0.000597720797036345	64.7657360537709	174.166906873101	2.71592310878567	3.85573138334483	0.151543816110737	0.859990948237771	0.830675625334489	0.817472486923766	3.77663159052682	7.37756318820875	2.71592310878567	0.275456296271646	18.1602943076501	2.71592310878567	1.85488166309246	7.38264432692553	0.291916303321691	22.8466751301839	54.7952818038309	130.744978759228	406.297017679573	0.512996610585704	43.4545399482374	217.139418258736	46.1327773380123	80.8812057618998	27.5867864836663
Male	Non-Hispanic White	228	14800400	2018HU0704786	W	N	19	74	1239391912	MFMMF	NA	3	48	462	228	228	19	462	5.1836132175639	4.3482597018868	-0.185304942107188	-0.0104790846004809	64.2611185252001	176.467042865507	2.45600595080152	4.04934819331663	0.146266446426553	0.510835731901031	0.395603061681624	0.870831088317788	3.46755364249174	6.67588544169717	2.45600595080152	0.308950389388177	21.7708652524855	2.46722428231408	1.75881926827018	6.67611634665098	0.376994121206485	25.1648871429747	51.1735706606768	119.202651082327	410.31473302516	0.474806424284951	41.6006614689053	178.473018157987	38.4178950417988	64.151206721717	25.1933856502832
Female	Non-Hispanic White	192	14001202	2018HU1155754	W	N	2	6	4652371510	MMFFMF	NA	2	40	463	30	30	2	463	4.51824806403498	2.61707496638688	0.0759235450505327	0.0126806618544518	14.7759153121967	92.8447483752451	2.21487311346094	1.02254034736018	0.0467826900177471	0.122542629420961	0.0646086120098243	0.171510241787533	0.304913902567071	2.21486962619717	1.34172892846964	0.0265811831450503	1.8772825719028	2.21487348119141	0.288083095357257	2.21487348119141	0.0839944082268027	18.1342647483362	16.8956272338484	24.0658668391572	243.708044787742	0.0393103570975018	9.71998940496364	34.6487230094547	10.180640305448	12.9903041507753	4.96437197848773
Male	Non-Hispanic White	143	11703407	2017000978427	W	N	0	53	012830	MMFM	45	2	17	464	7	7	0	464	4.22314337954595	2.07527827391943	0.0210467460686372	-0.00886255736941699	8.1362144778903	67.6454992301413	1.44537650651547	0.205398132070352	0.014966839968403	0.0953811806542141	0.0152212339443657	0.0920773346931249	0.151921735004582	1.44537650650094	1.06879168500047	0.0122591176706771	0.317107739544509	1.44537650651547	0.154759483469153	1.44537650651547	0.0234914906981971	15.3015659712177	5.43859718258894	11.7881804760989	199.893459806888	0.0502307035222714	4.12993631396413	19.4757440528921	4.11277451260388	6.62893697026464	2.65720525725211
Male	Other	190	13603106	2015000252299	A	N	14	55	77451445	FMMF	NA	2	36	465	175	175	14	465	5.13600446958216	4.08501542263336	-0.119769916283259	0.0107078016417902	52.7332141395054	171.865513243609	2.18612337043559	3.17493490683228	0.11317749686398	0.736259634725261	0.579481266863985	0.700729403649022	3.56896660036294	5.37319475071274	2.18612337043559	0.246646302270321	12.6379406930511	5.94243847943948	1.52968438700758	5.94249943262469	0.210669017852695	23.1217924169567	48.3266911393571	97.935498405739	402.263807291215	0.443259064170746	37.2900427084996	160.995446968062	34.3511666853338	52.9008862966829	21.9849577549931
Female	Other	276	15310400	2017000408447	A	N	2	12	3023804	MFFFF	NA	2	53	466	33	33	2	466	4.53228098778945	2.62217083368816	0.653014649314848	-0.0053169987642169	26.4481307043378	92.4773721350129	3.71937941911475	1.72543131552744	0.0749109356286246	0.192688009539276	0.158709621224628	0.246300295629804	0.710033192505631	3.71998662053577	1.52648134147324	0.0561573217201409	3.08441025389083	3.7199879755272	0.603629555204125	3.7199879755272	0.120389788158697	18.3262644605654	29.4455780486928	42.1284971832093	242.984442453783	0.0655660553554049	15.1254933454344	57.7012533371301	17.1580405341986	22.5067097761321	8.31314835261821
Male	Non-Hispanic White	197	13604002	2014001276983	W	N	4	57	425	MF	12	1	36	467	53	53	4	467	4.66118596078942	2.88577447131073	-0.0457190600259116	0.0143002375026352	17.1167139699817	107.28471605936	2.45289688669638	1.31457616995686	0.032482774186028	0.198925192244366	0.0664670536540363	0.166599289507739	0.798758188417787	2.46655061536662	0.907417404992143	0.0138800370338065	2.5354013753744	2.46661590079342	0.444841635356789	2.46661590079342	0.0546814507174621	18.863112222931	12.1512921543579	31.2252767834807	282.502826468183	0.128147880506584	9.75325353698436	48.6445889344585	10.3715885850435	17.5687954519508	6.40869865377909
Male	Non-Hispanic White	154	12200500	2017000960566	W	N	9	36	3418109	FMFM	NA	1	22	468	113	113	9	468	4.92165104454335	3.51159179373308	0.247569913394089	0.0289693986907064	42.9124377058296	141.262582150918	2.18981887427854	3.15429649920533	0.0984380882944737	0.530932279963561	0.195634521145566	0.388702633315297	1.48200057081312	5.89448048404823	2.18981887428512	0.135049665590521	6.54809710103516	5.952544853568	1.23475018985917	5.95254485356798	0.358897439193088	18.5963411448664	38.360304698425	91.6711378688815	347.248006028719	0.380189481595812	30.0446284543095	142.508939703755	32.0639504586647	48.4328614227594	19.0102559414319
Female	Non-Hispanic White	79	10900105	2015000228138	W	N	18	41	80581851	FFFM	NA	2	09	469	220	220	18	469	5.09718312973662	4.16210421954554	-0.149842994009771	-0.0210602301315325	55.2717111685878	160.151925583096	2.36665122906577	3.122644751022	0.236783858211255	0.852844294829531	0.418866681573148	0.684876232462731	4.15549301316492	6.42509811322525	2.36665122906568	0.251191528171136	15.3423027434585	2.36665122906568	1.40512182816363	6.43322503026947	0.328641608797271	22.3543964948347	73.4141986162104	96.1623323131778	366.818289477966	0.169913676025618	41.7692029281613	142.815751576579	43.4927116289344	53.8536760650869	21.7032738909199
Female	Mexican American	196	13600403	2015000573744	W	M	17	63	17151145	FFMF	NA	1	36	470	213	213	17	470	5.07023203510861	4.05615706334571	-0.277379543912048	-0.0302744865034397	43.7625102033538	154.463457697479	1.90234515150404	2.44058374681337	0.174297540174212	0.437999552437741	0.536934347245777	0.471310661764006	2.28977471015831	4.99637997132687	1.87076064112163	0.163707936187318	12.013315112648	4.39976691980786	1.0049747928595	5.08525465615503	0.256492284707848	22.3928965798187	55.1350991310534	76.1714234579347	357.002429883207	0.127016119981366	32.9978839951826	109.554314338282	34.3683914606915	44.879053903125	16.6966523652572
Female	Non-Hispanic White	41	10606505	2017000912698	W	N	15	19	151530	FMF	NA	4	06	471	189	189	15	471	5.09674009600529	4.12514953993076	-0.577741644854531	-0.0316485159321848	34.7231945704197	158.394947230326	1.51962568935782	2.1811709156735	0.144958547214752	0.386175127109838	0.26840322298209	0.376206368744907	1.57237242070687	4.09365158518153	1.51796880877839	0.0772055926752407	9.25445111342758	4.06048849579058	0.960591263833523	4.12626702906921	0.188363859009084	21.874764477099	42.2126790356069	65.8414070709767	363.795942076991	0.118068466617637	29.0789048115064	98.1655140378999	26.7008753463699	33.7360607125309	13.8057723208256
Female	Non-Hispanic White	46	10603710	2015001367045	W	N	10	19	3910381545	FFMFM	10	6	06	472	122	122	10	472	4.95687723134006	3.64329333129898	-0.214210198436162	0.00814950203876809	30.8483459448207	143.312381446317	2.39925070748417	2.18019270247841	0.130235800508045	0.332789021283117	0.190595576040258	0.47988837455426	1.10433294470304	4.2234608406193	1.57142052167109	0.128476239864577	4.66266995575774	4.27156384892615	0.90659959484594	4.27156384892615	0.14551466229413	18.6308586775077	45.0056596707358	63.2518630249144	337.492901241295	0.111744668616362	26.2972812821052	93.1406400929953	26.6669263299669	35.2118056828843	13.2585817732221
Male	Non-Hispanic White	120	12000802	2015001125397	W	N	20	44	1612204751	MFMFM	15	3	20	473	243	243	20	473	5.17363936800538	4.32378046457576	0.151238951876051	-0.0390454987363423	87.7963050859325	169.795346761287	3.16943241744177	4.54785716221206	0.182228101571502	0.768592998052763	0.996024793268814	1.1403665555082	5.61422476186313	8.61537657520552	3.16943241744177	0.335017793784241	28.6584863002563	3.16943241744177	2.25904045371675	8.61541054204132	0.307519971549521	26.7009550993354	59.6281575215595	153.081445360658	398.624275952585	0.597106288556537	48.9417250289244	237.764252743113	53.8629715940112	87.458756735511	31.5853175645845
Female	Non-Hispanic White	83	11210303	2016001228199	W	N	9	22	96763734	FMMMF	NA	2	12	474	118	118	9	474	4.94348709537708	3.60396046343082	0.0614879914126469	0.012797024014957	39.0736550044397	142.06491760884	2.02414802846875	2.77096464593066	0.165437056544234	0.540218901517748	0.311037194301477	0.526825745817092	1.61112979166717	5.5005209192485	2.02415363756174	0.0887687192126842	5.23054884872257	5.50220480389781	1.2496300459693	5.50220480388622	0.284443331336186	18.3037537052061	57.7655439095489	84.2612882691617	335.28721283061	0.136688816616181	35.46799516098	121.979855479433	32.3547852368338	42.9874540822087	16.9667737705466
Female	Non-Hispanic Black	130	11700202	2015001056569	B	N	3	199	60365341	FFMFM	30	0	17	475	42	42	3	475	4.60589159345905	2.770311159113	-0.0167709538725039	0.015721719039935	15.6981081523067	101.65790587439	2.32148117384966	1.20397933147398	0.055266625648542	0.135261435020265	0.125355345274826	0.211828650341401	0.243481839667495	2.4294508654904	0.893758300916448	0.0301433966806488	2.05455629473609	2.42946292046337	0.390542970392465	2.42946292046337	0.084657823606428	17.5643273960573	20.1116314287437	27.8346361735346	260.860142463573	0.0492235860985901	11.8558499479653	40.5254817504977	12.1567617324121	13.5454273020969	5.8285902965156
Male	Non-Hispanic White	264	15555101	2015000806381	W	N	9	23	1032389	FFMM	NA	3	55	476	112	112	9	476	4.9179259274763	3.50126514362058	-0.218277154601897	-0.0184970976963509	26.6552995704037	134.213099262793	1.481511573093	2.09325458670767	0.0580406725377304	0.391337845892607	0.195140133812739	0.304507565289519	1.2402443762511	3.74820093977948	1.37890544113287	0.105133144037742	4.17518199240333	3.74825360379403	0.738782587711685	3.74825360379403	0.142146052933866	18.3307606402689	24.4632310754316	55.5041929112539	334.168557666666	0.223404651772337	17.7234256600985	88.0834426473962	18.7766896566771	31.1777172274734	11.5196710605499
Female	Mexican American	156	13400502	2017000918935	W	M	19	65	131442434219	FFFMMF	20	2	34	477	237	237	19	477	5.07171542746124	4.16739843462299	-0.0873357798317513	-0.00917350928413889	59.1491757130425	157.991608076591	2.60925967386254	3.2967849286374	0.261931336089158	0.626413053603694	0.665799812944281	0.710727639602564	2.38257045012334	7.09264532817262	2.60925967386452	0.31226269015501	17.0031360223027	2.60953093064836	1.66312096142893	7.09270315719143	0.349999110831325	21.6689494746543	87.3028799327902	116.689066317839	363.100939308479	0.213205683365039	49.2072656555035	148.61930001235	46.8563557890607	63.3483543926376	23.6856159619804
Male	Non-Hispanic White	227	14500200	2018HU1207530	W	N	19	32	63519	FFM	NA	1	45	478	230	230	19	478	5.18498666259863	4.34320683491743	0.148501843781046	-0.0350548650863056	89.2738559676638	172.419730461291	3.16656606657716	4.30322787774796	0.192109232001481	1.10227303527698	0.854545514220155	1.00026047241921	6.81440091201886	8.58033946019026	3.16656606657716	0.430483084545827	28.351652997212	3.16656606657716	2.55204825737656	8.60761899739129	0.532128402788586	27.1926396262317	63.9750497083026	152.419521897401	403.236305113894	0.594371948126914	50.9583895843126	242.212762872973	49.9994167028994	88.1248448532072	31.9218600146403
Male	Non-Hispanic White	262	14804624	2018HU0748268	W	N	2	20	23432	MFM	NA	1	48	479	30	30	2	479	4.52632821611614	2.65109677299405	-0.0441815709674733	0.0366538546168804	13.5571651649789	95.8689419503996	1.92065332910709	0.904889924221774	0.0253343892124166	0.118238829528152	0.0487505225515741	0.103479779422397	0.297436157143237	1.93508399006434	1.45021105960895	0.0217693599985852	2.00291495961201	1.93508439120723	0.333261859888917	1.93508439120723	0.0713731339941904	19.04423180758	8.35913967588226	22.3732076735144	259.643739855272	0.0958015617221616	7.77226786216102	34.072594670782	7.63581285875793	12.1587865369074	4.62086512708498
Female	Non-Hispanic White	82	10804106	2014000768745	W	N	12	17	1012521549	MFMFF	NA	2	08	480	148	148	12	480	5.05442016454176	3.92588806591961	0.379064780480062	-0.0105710716770343	74.0657229050105	155.065730204577	3.38271375192155	4.85722899822698	0.287807260554127	0.186377388235674	0.878813200617219	1.10390941904868	6.40544577002974	9.16557490287189	3.38271375192155	0.364972727928271	14.035148271679	3.38271375192155	1.81271430132826	9.19516932261428	0.466178781600971	20.895356313533	113.151375723776	143.058206488193	358.045920005445	0.216003030585389	61.7516040321236	198.55528389353	61.3864867554447	75.2057913500507	30.2791714355456
Female	Non-Hispanic White	119	11800800	2016001047291	W	N	12	11	9332912	FFMF	30	2	18	481	147	147	12	481	5.05164388874217	3.91603088838066	0.356133211295808	-0.0107825134231033	71.6765831682209	154.603129006689	3.34899857655704	4.27717021374917	0.311283699436277	0.549057109732305	0.797986950342542	0.922822696200567	5.80157251148311	7.85487231409126	3.3489985765574	0.0818734372337845	14.1772291787744	3.66995029816321	2.39238161097712	9.10352197418914	0.407761019042938	20.4023928436269	89.6651388899773	152.938661646534	357.244513174233	0.243754418866982	62.0099796868955	204.589454720502	62.7305801817099	81.2605073081295	29.910284152583
Female	Non-Hispanic White	41	10603766	2017001282543	W	N	12	32	12267	FFF	5	2	06	482	144	144	12	482	5.04152503150621	3.88374399390216	-0.0221320587028064	0.0699119962382858	47.5419241380656	165.908598910771	2.13464996380946	3.017116157632	0.174197838883863	0.40296869561445	0.456702738777295	0.664487614677	3.22142536829709	5.8003118286876	2.13464996380919	0.1390428221628	8.91451871758158	5.80258020674326	1.59597444672587	5.80258020674326	0.376255371981411	21.2715316066217	65.3050869191102	100.118774859995	376.66349306307	0.166136356813086	40.1259616633262	143.889052757375	39.4235850006321	54.1066322441075	20.1011177958831
Female	Non-Hispanic White	228	14702003	2016000355649	W	N	18	82	18621658	FMMF	NA	3	47	483	222	222	18	483	5.0967651194347	4.16367308006482	0.0955835195472305	0.0244002117710483	70.7573628466191	167.530484413747	2.99606836816174	3.69525550285729	0.295601506002397	0.780075415405974	0.863288095463103	0.973842875619725	3.90242572107717	8.13532276591715	2.99606836682212	0.265365921193691	19.638662792068	2.99606836682211	1.69684134537252	8.14415819834765	0.418536101074477	22.6167383996215	100.573155666781	134.346122857636	379.421765892345	0.241477860332105	51.6233328687768	190.752294301648	58.7445670579553	68.4303562095968	28.419338761846
Male	Non-Hispanic Black	118	11701300	2016001121627	B	N	8	51	3983864	FMMMM	30	1	17	484	100	100	8	484	4.88338587245865	3.44168980976636	-0.228157346299387	-0.0010188896540565	24.8667722240347	131.942600432388	1.30400463561538	1.96165190380996	0.057941935464174	0.371328026924429	0.136938688367441	0.306308722692135	1.13566545073589	3.5322126726795	1.29943999840722	0.0900054494753017	3.8587023823174	3.5322441348432	0.644145966760953	3.5322441348432	0.285766672181855	18.136509643837	21.1297507622872	54.105419138237	329.91965137021	0.227849071191396	17.4864793139023	91.8538676734577	17.842550709041	25.9853603359107	10.7177697812754
Female	Non-Hispanic White	166	12401005	2017000884078	W	N	12	18	12571760	FFMM	25	1	24	485	144	144	12	485	5.04152503150621	3.88374399390216	0.0621799873935489	0.0121844046447363	51.7241081478646	156.602294613069	2.57940592398116	3.49394071604656	0.241913389717859	0.519757518841011	0.710832565004527	0.897790652084797	3.03465064047266	6.71991763227791	2.57940592090978	0.210636095877231	10.701992645974	2.58004689599985	1.25353397803126	7.01155224268865	0.338704281077137	19.0527213376741	78.2817362930083	114.239297304016	360.703576683531	0.188608441318135	43.9908709733284	164.930461241262	49.5513824972397	60.2186661289865	23.260023534354
Male	Non-Hispanic White	131	11800401	2017000178659	W	N	11	63	94415451113	MFFMMM	15	1	18	486	140	140	11	486	5.01995561879794	3.8080848542583	-0.138565710874803	0.00586103646298354	39.2330358589073	152.294577509832	1.88154443004771	2.73192931271041	0.107280834927413	0.484179225148301	0.389446357500148	0.618235202466603	2.65719277214387	4.92778826970689	1.88154443105313	0.210133657342321	6.62598525708615	5.1145680304539	0.859090269738672	5.1145680327231	0.278526442317389	19.8515064748647	34.0710005729574	88.9746973169137	367.394571954628	0.368598251716106	26.6221515566679	134.393862814697	28.997337440304	39.8329223604045	17.2817302591916
Male	Non-Hispanic White	76	11201108	2014000138566	W	N	12	18	30912	FMM	NA	1	12	487	153	153	12	487	5.06444294516454	3.93651406449056	-0.0845739589223616	0.0633392274812845	47.0843232336152	168.642682627199	2.42089727666942	3.50893379731042	0.135893034450478	0.28656303550985	0.510282567939997	0.382661776567794	2.29031391838366	6.58031507641359	2.42089727666947	0.216504612482859	9.82935283025533	2.42089727666942	1.39913093275742	6.58068107573648	0.322744903746702	18.44912065738	47.469199137829	108.187321691202	396.59298833785	0.509266946038027	40.3903185425569	193.424653309598	37.5968762746383	56.5203965304755	24.0027721353322
Female	Non-Hispanic White	192	13903000	2014000775053	W	N	9	71	139113338	MFFFM	NA	2	39	488	114	114	9	488	4.93086428217401	3.56336769264497	-0.311804995426491	-0.0673919388604827	25.8306739163514	129.472997167179	3.07457836637418	1.66085087749753	0.100001030899383	0.253970384216349	0.26478975040192	0.269622073596919	1.13519028023168	3.53875446453443	1.30184121761358	0.0861981017179152	3.41273771367257	3.53877129443167	0.62094226726666	3.53877129443164	0.151321232391644	18.8416449788914	35.26469597655	46.2517601495962	312.742035871446	0.0794884891874719	20.4806669369617	70.4416214005223	19.9394227596497	25.2194153567353	10.1785117304354
Female	Mexican American	263	14935002	2017000677629	W	M	18	17	521826211455	FFMFMM	NA	3	49	489	224	224	18	489	5.0678875357385	4.13779236012003	0.198675481140598	-0.00611971502989434	76.437074077161	157.869354496933	3.20498622378623	4.26447028391312	0.296857501592297	0.935679150138158	0.791715637341945	0.838845444495697	3.99359575059333	8.39482837696386	3.20498622378623	0.475994618895798	21.1101841640755	3.20498622378623	1.90774261103389	8.71205568551921	0.381110795473385	22.8494235981026	108.724004713588	149.834609315069	362.890193852525	0.23906928966737	53.2128461800242	195.362945075019	57.162919650883	76.819054643898	29.0764518011114
Female	Other	192	14001601	2017000849809	A	N	18	37	18421450	FFMM	15	1	40	490	216	216	18	490	5.09244703766877	4.04689053406053	0.33942172935467	-0.0497488959179811	80.3435860144786	154.887359797165	3.26476314109505	4.25038963994334	0.278295624326294	0.828119677618326	0.808457661794587	1.00369179567892	5.78910393415136	8.67643298621982	3.26476314109505	0.583411275501233	21.3757996933607	3.26476314109505	2.00361575293825	8.87454632066145	0.484438510461146	23.6093154517575	95.4571518508612	143.690794533405	357.736983350896	0.227233715242999	58.9769937422388	212.605233120723	61.1406576405941	79.0421043629457	29.1981629362634
Male	Non-Hispanic White	202	13602903	2014000695978	W	N	9	32	911426345	MFFMFM	20	2	36	491	110	110	9	491	4.91078172005579	3.48211862866679	0.359746783624063	-0.00984904047773003	46.6123446308176	134.415087446901	2.35779531025363	3.52667551859533	0.11372749374518	0.557193224061939	0.50731919862872	0.540749421575348	1.38146912677226	6.40884383859268	2.35774950251873	0.164357578273464	7.07398688402501	6.40902760538037	1.01665013302815	6.40902760532592	0.264711787331998	18.7698460945619	38.5036364589118	96.5472556274749	334.545674787989	0.408557433751993	34.4148952797314	138.703806534491	30.16160056489	49.3873165286102	19.71937238561
Male	Non-Hispanic White	80	11207104	2018HU0262265	W	N	21	16	464821	MFM	NA	5	12	492	257	257	21	492	5.18527516970957	4.35141991279146	0.031969447115881	-8.07128316906327e-05	80.109092333232	178.608178001805	2.92094435583463	4.54090265351793	0.173472933114902	1.09950500882463	0.980890874109119	0.967057085577545	5.19039929343127	7.92687248929083	2.92094435583463	0.512723614100445	26.3662977847534	2.92094435583463	1.56699743482738	7.93994996304089	0.162518323521046	26.4257509127871	61.9091358472236	146.98375263587	414.042965430258	0.604567207514106	51.2174510167581	230.689120097983	48.7630704438803	77.0578238384676	30.2349115736636
Male	Non-Hispanic White	130	11700401	2014001172358	W	N	9	14	733936	FFMM	NA	2	17	493	115	115	9	493	4.92945543711153	3.53423555780025	0.333000906768817	0.0276178985184537	47.8100785007882	142.177081803739	2.55199917354864	3.73870750014299	0.118696844238782	0.656497182465875	0.486563716745588	0.606959673462586	3.26799368512138	6.93591589189342	2.55199917357125	0.218453723530642	7.69597769870883	2.55199918724182	1.10990244634711	6.93705297969977	0.0948302519194279	17.7343628463275	45.9237561415362	102.209382899694	348.932644801004	0.43792764653248	37.4846475102795	185.186347557077	33.8558605165147	54.4302842094767	22.2618955289076
Female	Other Hispanic	22	10200300	2015000012842	W	O	18	81	12353518	FFMF	30	2	02	494	222	222	18	494	5.07511695485195	4.14908974930303	-0.0665188102416974	0.057696520264604	59.2977248839637	169.493313068086	2.59690712276197	3.39041510364033	0.251113249916939	0.868322988860995	0.660436055610252	0.741837666107392	2.51167147533792	6.88356300649473	2.59690712276197	0.418261696099334	16.9057415756476	2.59690712276197	1.55617860869237	7.05912544199298	0.425867371121775	21.8339798386385	89.6342720446549	116.53877329817	382.75095630121	0.200392099548103	49.2767071338301	172.372190173634	48.642920374753	59.0423690627915	24.8492171165642
Male	Other	185	13701204	2014001460420	O	N	7	63	2872	FMM	NA	3	37	495	90	90	7	495	4.82145195351888	3.24309738040544	0.290367237611673	0.0438609336894327	34.2423991693498	129.711517337741	1.76414680498874	2.45032671249764	0.0774114497440645	0.508703146089139	0.195240993297222	0.415603821653142	1.82110678553315	4.79061724350372	1.76414680499532	0.120506874345849	5.0623161487021	4.79544820273483	0.898645585228283	4.79544820273483	0.179378293196444	18.4101754313306	29.8007300427076	74.4522841139548	325.726662938428	0.266273819345847	21.9250325413186	116.692023984962	22.6644245790665	38.6272113744842	14.3657412930613
Female	Non-Hispanic White	132	11802500	2017000158386	W	N	15	44	15694221	FFFF	10	2	18	496	190	190	15	496	5.09632407533431	4.12644742950815	0.263192071102653	-0.0539007975718794	80.6113533980674	154.844792690056	3.40348767338528	4.51022801527109	0.27000472739518	0.727559960413309	1.43016308135267	1.07438178314685	5.97585405221448	7.39145850632678	3.40348767338528	0.481814972627836	21.0409481933881	3.40348767338528	1.51857269305746	9.25163869594756	0.429869884999251	22.6849259153882	99.2371927927601	131.275274850849	357.663244191228	0.25014383163873	59.941140464268	211.302627851961	66.5501648850954	79.5988048773987	30.4325610706959
Male	Non-Hispanic White	76	11201105	2016000649592	W	N	17	30	4417	FM	NA	2	12	497	204	204	17	497	5.1767952648338	4.3359005353314	-0.0606237576576994	0.0597328342332033	71.9000368808768	188.016194310015	2.73620200644754	4.05368014065583	0.157594873297792	0.870595600584107	0.886082301131229	0.833624790409968	4.79399820204306	7.39666445820925	2.73620200644754	0.43554831867866	22.8826402101551	2.73620200644785	1.62816603355261	7.4377677882211	0.332413954823448	25.2773131192261	60.384374253951	143.300049467643	430.294553069107	0.589430042113356	44.6317756263316	212.243038530761	45.7227095628794	82.3070421197281	29.4343204867784
Male	Other	263	15151095	2016001327256	A	N	4	14	3534456463	MFMMMF	NA	2	51	498	51	51	4	498	4.65834359844587	2.8762372277415	0.0827666785482916	-0.0456554212349133	19.278758737789	100.75463222719	1.84659423596478	1.42574659642336	0.0385875378982197	0.196836315962857	0.0950409259677708	0.216558500492577	0.576005424943622	2.76083346602198	1.01565456841245	0.0401254191384687	2.81871299513475	2.76083518898016	0.476332755925114	2.76083518898016	0.125174700845609	17.7955790484146	13.4679649267	33.7943320377497	269.505834623263	0.141472296658894	10.5773165316798	44.0933351723222	11.0010546796217	16.9662401592692	6.84312038650138
Female	Mexican American	262	14804904	2018HU0211507	W	M	9	16	459444	FFMM	NA	2	48	499	109	109	9	499	4.89916260803562	3.53712146781191	-0.189667657689802	-0.0371013116750894	28.4302525862969	129.290433522259	3.71728002336219	1.9045403841218	0.115893740336783	0.192414891120428	0.2317568915988	0.381093270665617	0.866426998213379	3.88051689314706	1.42789968318465	0.0868984554885737	3.70023751635646	3.88143371986488	0.677382512769849	3.88143371986488	0.149116929587702	18.9105138161769	37.8663152945579	51.5183512516489	312.411240667561	0.0912848190475319	23.6700563918081	72.0949323013774	21.6609552525074	30.9930027846226	11.1522976692165
Male	Non-Hispanic Black	263	14913001	2017001348107	B	N	14	38	6665161040194214	MFFFFFMM	30	2	49	500	176	176	14	500	5.1406537922277	4.19606426225483	0.447255050427826	0.0346401026630814	103.888614698443	176.848581534157	4.10225545848215	5.86215192779622	0.226329513179441	1.32705337378595	1.07427042956517	1.51342849621204	8.2280152656524	10.8033379854485	4.10225545848215	0.367258191302892	23.6264935708785	4.10225545848215	2.68619122993745	11.1510864684792	0.5836274863972	24.3247550645912	82.6343262332703	209.694800806033	410.979908216204	0.840932877836957	71.211288210158	313.877970674261	75.5782207533714	104.072792838678	42.1486142951604
Female	Non-Hispanic Black	191	13702202	2017000607152	B	N	10	30	8104850	FFMF	NA	1	37	501	121	121	10	501	4.97043058427716	3.7383243082685	-0.0126665259498983	-0.0646704157860278	41.4985207622646	135.065543562925	2.07384366675484	2.97124274174227	0.166685782109797	0.429362536682455	0.37453628560284	0.581399269201485	2.60467095044594	5.55066638979955	2.07384366675502	0.204876060513712	6.06254145429873	5.6287174266966	0.754451612653301	5.63729155435032	0.265659808164489	19.0104383119686	54.0987850330735	79.6631473379575	322.819890474085	0.139300915228366	34.5115510491553	106.366872019217	32.9518440933217	41.6018606829407	16.7369496340542
Male	Mexican American	268	14803502	2018HU1386860	W	M	13	48	51333	MMF	NA	2	48	502	159	159	13	502	5.07519886239469	4.08799207323468	-0.124735502598783	-0.0678808613643587	52.6284354002082	149.503230460742	2.31549454647311	3.22294709620579	0.113348336508705	0.859082546642017	0.593213302549006	0.507624211336637	2.72927810721303	6.29204574460713	2.31549454647311	0.133913372250049	11.1934088400708	6.29416674957386	1.28973169931747	6.29416674957337	0.43156481248713	21.7288099124959	41.5136926098883	98.6364674445643	362.332539582948	0.414159707108954	32.9600995050895	167.654948327401	36.0493512136868	54.3512714089662	20.9744754853517
Male	Mexican American	191	13604012	2017001105097	W	M	14	84	4719517514	MFFMM	NA	2	36	503	174	174	14	503	5.11758801258869	4.16282936191342	0.398773790374532	0.0476712954744755	95.7368375995303	175.082853081489	3.9495447948494	5.18510544766614	0.21120788594317	1.27346418819948	1.27559409803056	1.54055359653206	4.6887695782733	10.5373065091886	3.9495447948494	0.459786775707394	22.9147516061648	3.9495447948494	2.68641485390116	10.7359758464641	0.658232389083166	23.2399675335701	84.40430332123	196.996853915823	407.898507797812	0.84108253700127	69.76235399305	298.898213247931	68.4570684373582	116.595273165763	40.2753357074922
Male	Non-Hispanic White	83	11205706	2014000257598	W	N	6	11	56318635131364	FFMMFFFMM	NA	2	12	504	77	77	6	504	4.78474641967945	3.12947765287367	0.219096007452874	-0.0190975671392483	28.4621080438094	117.407272585413	1.64278437427736	2.23726469558355	0.058410187536095	0.505405887075958	0.27322769826469	0.353539681779219	1.09603181157537	4.06430234179869	1.49517333021574	0.0708215911207589	4.2030124902089	4.06430249172781	0.709912644943977	4.06430249172777	0.12832088624279	18.0359921899499	22.6845319373862	55.0315473106205	302.266943680409	0.230991848228091	18.2023918087579	83.672987644484	18.4237185287422	32.3145413516654	11.2985368138194
Male	Non-Hispanic White	60	10607322	2016000871805	W	N	5	10	541509082166039	MMMMFMMF	35	3	06	505	70	70	5	505	4.7578836653583	3.06713321630495	-0.377574378023756	0.0150431284914888	14.7251783023282	118.264872821225	0.972460788353528	1.26175183506766	0.0375192946038032	0.238824304290456	0.0746927089756203	0.22165402180561	0.347539630765732	2.36065863148031	0.868437906403435	0.0399378597537905	2.45935117528795	2.36065863182188	0.418361772710947	2.36065863182188	0.101639756098075	16.9559393554274	13.0586315999393	31.8226649244767	303.92136567442	0.127900432687964	10.3392590485235	49.5064730102577	9.74038422659412	17.8435587244725	6.59841988938588
Female	Non-Hispanic White	264	15501001	2017000851696	W	N	16	19	1618584610	FMMFM	NA	2	55	506	194	194	16	506	5.09448311153304	4.1299070609348	-0.105464216372357	0.00179616387663196	55.9491277353618	163.41276089181	2.52842162319304	3.49089259701682	0.235192507186582	0.730695487657891	0.61464387066105	0.711238957602981	3.4637179744817	5.43764522745321	2.52842162319304	0.245674576353419	15.8448013002567	2.52864071125604	1.19080847047971	6.87296255268601	0.348188367541282	21.1280846604634	74.5071027100897	121.277143624936	372.405711860067	0.186380220569987	50.0708197549286	156.105574170025	46.4109767968631	67.9302310572039	23.5399663616897
Male	Non-Hispanic Black	58	10603740	2018HU1187450	B	N	21	13	1321414911	FMFMM	10	3	06	507	255	255	21	507	5.16992374247318	4.38102493043706	-0.0672096743353145	-0.0143459534191462	74.7250409442105	173.395964111265	2.80417171071329	3.89925140152791	0.149293641801272	0.934724807317271	0.51175792589257	0.679815222674738	4.62159914914425	7.5561395201587	2.80417171071329	0.488019056599783	25.4174272054254	2.80417171071329	1.53032816085537	7.6225290051107	0.249002247659926	25.6478121360132	53.095288970778	138.019059447204	404.947427000434	0.538529291615177	47.4261652801243	222.885170883757	42.3631206206491	69.1729330521959	28.3885529780188
Female	Non-Hispanic White	276	15311503	2018HU0256372	W	N	1	132	22122	FFM	NA	1	53	508	12	12	1	508	4.30296969588452	2.20772093033789	0.0157155140712692	0.0166224782585467	9.23902577426417	75.1579706771669	1.47213278581948	0.543340385416584	0.0299068276973632	0.0822676122182346	0.0420984979067007	0.105980842783329	0.247751975174231	1.47213278581789	1.35221889689533	0.00619052277795188	0.404458506411181	1.47213278581948	0.25755347774402	1.47213278581948	0.0435599989377064	17.0597897939396	9.38684772439581	14.595510148072	207.985539844314	0.020827229619244	5.33859348182322	18.032159923274	6.16540933494948	7.13263174842433	2.81595463148452
Male	Mexican American	269	14805500	2017000081509	O	M	17	59	5517	MM	NA	1	48	509	206	206	17	509	5.14313344684566	4.309731403692	-0.0506798477332773	0.0160278198936783	70.7428559857621	174.018439326284	2.74051582220331	4.07072835017301	0.157981655467524	0.858367554690297	0.858789725720021	0.918515520723322	4.16545569666861	7.36483932776052	2.74051582220331	0.374771219779551	22.4089349034345	2.74051582220331	1.69133389954341	7.44949435842798	0.34960042612903	24.813700987461	58.2588262091054	136.095165245018	406.037230878679	0.547620006696024	48.0551154329693	224.688790669047	43.5671110236175	70.9598612894093	27.8187863906659
Female	Non-Hispanic White	276	15310600	2014000154272	W	N	8	80	381183516	MMFFM	NA	2	53	510	100	100	8	510	4.87014076384196	3.38639929858999	-0.223974470554257	0.0257615433259148	23.6278199220283	133.740627314564	1.28463830570534	1.68854791502767	0.105919903880672	0.365228462286484	0.249313706293688	0.339634205594886	1.22593026794077	3.4920086019807	1.28465565399977	0.075601197550354	3.12277468994295	3.49200866890243	0.563963884546309	3.49200866890243	0.134095277315061	17.3923909861786	34.5992088268824	49.0078292087529	320.441956525173	0.0867499340056126	20.1797884789849	64.8133115592891	20.2059762877366	27.5734242274303	10.2912994373021
Male	Non-Hispanic White	239	14501203	2018HU0746286	W	N	15	14	8252561615	FFFFM	15	1	45	511	184	184	15	511	5.15971927544864	4.20482126806709	0.449261647116736	0.0137452327514849	105.012870116459	176.525352838118	3.92770962517168	5.68468060327756	0.228803196861804	1.00910060370247	1.7108863030977	1.13348316954328	8.67613268089258	10.0798679599749	3.92770962517168	0.494919216005876	26.8881255129202	3.92770962517168	2.63281662026709	10.6766216947143	0.700971200518127	25.7364138742482	79.3913962182027	200.230131469344	410.416413992251	0.733651179160243	66.2989219159151	303.463200239758	64.4205116981951	97.8442542162928	40.2999124891453
Female	Non-Hispanic White	84	11211701	2017000193179	W	N	4	21	43433	FMF	7	2	12	512	52	52	4	512	4.64995225490511	2.85802670021212	-0.156233057569927	-0.00515891927185444	14.9064445957095	104.041861817953	2.27269174146135	1.06843983244554	0.0562009232752284	0.176419970401627	0.0605715705462133	0.177086018518849	0.291474169575116	2.32265648790256	0.854461461058133	0.0190960499694104	1.93037884072142	2.32266421644946	0.341029124933672	2.32266421644946	0.0919725314536329	17.4454478544424	19.8708261278869	29.4719695552269	265.434851039762	0.0469907741902948	11.0534816299666	37.6229235020217	12.0997486128183	15.5023558840861	5.67008931757955
Male	Non-Hispanic White	83	11210303	2014001352305	W	N	0	27	26024	MMF	NA	2	12	513	5	5	0	513	4.17380468267876	1.9814980506916	-0.160547419999592	-0.00311036516588186	6.17772839758693	64.7604007816752	1.07708604894201	0.163166874457978	0.0106662131205562	0.0660053429406982	0.00712283340447758	0.0299173019702594	0.0830774333990819	1.07708604894201	1.07635037533715	0.00202512179811695	0.17254246272125	1.07708604894201	0.0984190568195851	1.07708604894201	0.0450422549140564	15.5909612428933	3.75392458301587	8.9085858171911	193.464618408618	0.0381296651059494	2.82275578658336	13.6774522790878	2.91373249299882	5.16172978720231	1.91644993604231
Male	Mexican American	228	14801501	2017000075997	O	M	5	12	525124	MFMM	NA	2	48	514	64	64	5	514	4.71141280553615	3.02970214150524	0.0385000031838094	-0.0435116100088998	21.5032082447862	106.474039569803	1.51059217965946	1.75056086032069	0.0477474708264787	0.256533991173171	0.125127097380927	0.329664689872991	0.693877565713673	3.15461694539224	1.16054098032239	0.0520693023142355	3.21942454450085	3.15467681553514	0.485808295632838	3.15467681553514	0.0719911794850223	17.5270107974114	16.316317160964	39.5862122666583	280.900300436686	0.164336477167108	12.9065839517347	64.6345545529956	13.396294474982	21.4276735716369	8.14990609129383
Male	Non-Hispanic White	48	10609502	2017001337400	W	N	10	32	106033	MFF	NA	2	06	515	129	129	10	515	4.98232413262054	3.70214727191537	0.0365625086278887	0.0450201491135698	42.0437095434831	152.527404529241	2.05258095095635	3.29265901581294	0.103424767661975	0.601727208286397	0.347020907089974	0.555774450488428	2.03793365988581	5.55965292707055	2.05258095095673	0.127020094605789	6.49284724234287	5.57873387548365	1.33237336846486	5.57949350006209	0.221294159481627	19.4833380743851	38.1607713691042	89.1479790965386	367.815744437062	0.345372182106375	28.6964372937137	139.943592077587	30.7774997520303	47.3708324973056	18.8742897623335
Female	Non-Hispanic White	155	12701501	2018HU0342831	W	N	11	61	32915113160658	MFMFFFMM	NA	2	27	516	140	140	11	516	5.02717414270724	3.83786270545684	-0.178095950782441	-0.0457343287593509	38.8522797017732	145.683988558637	2.03458916091308	2.73938294562076	0.172865826620459	0.706414048198647	0.536818917752414	0.532517055714333	2.27365866818963	5.25537372759056	2.034589162962	0.103698069525692	7.01230721219902	2.76943652580853	1.15058324609198	5.53058674448964	0.249593151193638	18.0958845385635	58.6153399141372	84.0417286344266	341.673050513311	0.136403589704672	37.6855806511734	125.613831048472	35.4161443164383	47.8155134620194	17.3791071287623
Male	Non-Hispanic White	148	12101705	2017000206092	W	N	14	42	1442	MF	NA	2	21	517	171	171	14	517	5.12624430259611	4.10729731699062	0.405283795124378	0.0248464696118603	91.1568010454816	172.619676409693	3.73183935060835	5.17643697556419	0.202356809152487	1.09833733383879	0.849380454625878	1.38351588698444	5.93469458382009	10.0589567094194	3.73183935060835	0.460492420095661	21.848676020971	3.73183935060835	2.45955029774047	10.144191093487	0.624275808144841	23.426775239031	77.6763022252709	178.987430184496	403.586962998667	0.789464165097852	63.3687916565173	305.325277343048	57.6942514369792	92.282034281536	37.6530427477735
Female	Non-Hispanic White	167	12603005	2016001202835	W	N	10	46	307103456	FFFMF	15	2	26	518	130	130	10	518	4.98974902105285	3.7254525952701	-0.413239199141148	-0.0197968246605503	27.4458067336749	144.020002530658	2.40057964927562	1.85866201976171	0.126488694777807	0.349394674411834	0.352188327850654	0.383946067960736	1.01957616216206	3.73344314071031	1.37345815321422	0.0741821226106496	4.07855631706315	3.73344634003114	0.886919173003222	3.73344634003	0.196359135154491	18.9829902042576	39.1856140585058	61.8702780575241	338.741938455149	0.094507921012973	23.3429646219458	82.3953922410948	22.3136219249793	30.1907142804448	11.6311969301704
Female	Non-Hispanic White	60	10608503	2016000919650	W	N	5	18	395383	FFMM	7	1	06	519	66	66	5	519	4.71735884001292	2.99283887362652	-0.105220466697917	0.0334298857116435	17.950507848482	115.675484787018	2.66745753500168	1.37210711149331	0.0737643161841518	0.250787188631652	0.111957483376954	0.234343416616602	0.607564983668916	2.67152888123495	0.990103495412143	0.0420278332239849	2.21609306628325	2.67152888501341	0.423632781299097	2.67152888501341	0.116918840896423	18.2646497179442	21.9928637648238	33.8774500759854	287.39741264907	0.0553734334655825	15.0635761553354	42.6796177862499	14.2015289454255	18.2191373506174	7.06135840415558
Female	Non-Hispanic White	34	10101200	2014000379595	W	N	6	7	13396459	FFFMM	NA	2	01	520	82	82	6	520	4.79047086992753	3.15396911250912	-0.0524483978745089	-0.00030158056147153	22.2317337110208	120.321736129601	2.78869653692067	1.51948939239976	0.0875256510161321	0.309766395258713	0.153856726736525	0.306179992704911	1.0355586744774	3.05836473154721	1.1257132420635	0.0646632988363305	2.615872720764	3.05836854145477	0.519024243326624	3.05836854145477	0.131281389788691	18.6722470666709	28.5791920893539	43.8592390398593	296.012414322313	0.0671659883358767	16.9324801430765	56.8877885333403	16.997229829386	21.8985763736959	8.32616992069442
Female	Non-Hispanic White	120	12000500	2015001013038	W	N	18	19	111822501322	MFFFMM	NA	2	20	521	223	223	18	521	5.09693481591342	4.16434270934304	-0.0740874761644888	0.00281603017429704	59.7551412526038	163.981045690624	2.5630145244937	3.3284770832791	0.228928758539406	0.610224019781849	0.755193735543342	0.751102018079006	3.935307185134	6.56824001422982	2.5630145244937	0.197348830446274	16.9348471108615	2.5630145244937	1.56106057863891	6.96699580799655	0.467153149750298	22.3143982141139	76.5132702611042	118.368979674044	373.376599813614	0.183564534708491	47.9782976274322	164.486174775937	49.6213922510112	60.5608122706484	23.924241210709
Female	Non-Hispanic White	5	10400119	2016000073350	W	N	14	24	152514171546	FFFFFMM	30	2	04	522	175	175	14	522	5.09043459636433	4.08662458855085	-0.241278816894756	-0.0157505727591896	46.7748549741473	159.921652527944	2.10316796556848	3.03550916760726	0.207829112362991	0.408152051274806	0.311638667615017	0.560075498397548	1.02850381649895	5.20013837317405	2.10316796556848	0.137694653192046	11.8458372154003	5.71700326300199	1.34508937894049	5.71700326227732	0.327233918598869	21.2401899134402	61.3616766157765	95.8581006102003	366.42264847094	0.164627810001023	37.1517357208095	135.299507305216	40.0408050230445	51.3147462025728	19.2662094030711
Male	Non-Hispanic White	262	14801902	2017001138269	W	N	4	11	382436	MMMF	NA	1	48	523	58	58	4	523	4.69100953357279	2.94019814627152	0.00556102656325414	0.0200867515825082	19.0251002446447	111.173971497988	2.72751359922747	1.5207271082561	0.0402386757142411	0.225131309569394	0.122454907860363	0.217372931302384	0.780512331174754	2.72847066216598	1.00383289204231	0.0292092604342635	2.76643925295775	2.72847249500219	0.394145111625875	2.72847249500219	0.114575277662629	18.9540427379635	14.9656292805847	35.4441098396538	290.149445884932	0.146722880879712	11.2754551088802	50.7467033430719	11.4590371486847	17.3753095614687	7.28092994487206
Female	Non-Hispanic White	76	10901300	2015000528460	W	N	13	3	1346	FF	NA	2	09	524	161	161	13	524	5.07053859240926	4.01533624016474	-0.0784043841910215	-0.0442312313944833	51.261083393486	152.369327673965	2.33526836294521	3.39691119679417	0.229645717216566	0.38096548218742	0.547206792638175	0.670102907237635	3.63806397298535	6.33065737210904	2.33526836294521	0.299210697829036	11.3745791634967	3.56948153483006	1.56235909863153	6.34791755547149	0.281882657161586	20.9508319501372	72.9072972950343	96.6670802813953	353.366212183812	0.174938148956356	43.4470072369226	143.871293067542	43.7598204927196	52.8266293621715	20.630123396166
Female	Non-Hispanic White	264	15570201	2015000802930	W	N	3	15	41523	FMF	NA	3	55	525	47	47	3	525	4.62576567199366	2.80996509013044	-0.0253341246509685	0.0141023513195479	16.1938406877022	103.530683045071	2.43128332144697	1.19533100013349	0.0595235837362617	0.178063216020854	0.063038527568774	0.177983486272605	0.491933899378488	2.43128332152121	1.17610498641034	0.0374727244456592	2.00244455584523	2.43128332154655	0.340155007295397	2.43128332154655	0.0659045973055088	18.1054270739375	19.8199137824635	29.0278390033586	264.456147653615	0.0507910540177353	12.6186311920675	39.7480927196725	12.513544843644	16.1273140995737	5.91336606766758
Male	Non-Hispanic White	22	10101900	2017001088317	W	N	15	28	25233215	FFMM	10	1	01	526	190	190	15	526	5.16699511620578	4.2537659813499	-0.245873215368359	-0.0141556899443779	55.0307855538971	172.921792577895	2.3690643663089	3.34300513742366	0.135227677256878	0.566831810003693	0.4230537805293	0.745401232435282	2.1248147136116	6.05897473555154	2.3690643663089	0.236189730320328	16.4046876174713	3.47952452397495	1.6071783625243	6.43978461738728	0.231459280511247	22.2289110994638	46.9226292706554	120.577043622047	404.116610720807	0.481450941111657	39.3040987169917	194.735775840512	36.5005365552939	62.0174090435396	23.9344565573048
Male	Other Hispanic	264	15600200	2014000383640	W	O	15	21	413915	FMM	20	2	56	527	191	191	15	527	5.14713224512592	4.20097534836044	0.0315178902318655	0.0789443819851695	68.888774388031	186.06138145796	2.82480431100577	3.92031941699084	0.157563969274548	0.582782514405071	0.99870575571642	0.701847295987226	4.53502622537653	7.65975827832859	2.82480431100577	0.502228208937407	19.0603441912767	2.82480431100577	1.99730427452451	7.67861396224951	0.648989627993496	23.3870961679123	60.3187148082154	156.980765228085	426.934829452707	0.576773235971836	49.0208368382744	235.589484734443	49.971854664976	76.4932331441326	30.150183668913
Female	Non-Hispanic White	47	10605907	2016000815229	W	N	21	85	55972215727334	MFMFMFMF	60	3	06	528	259	259	21	528	5.10671386855643	4.19476769962438	0.352495094135531	0.0224112045773842	94.3737340802403	168.869305099651	3.74452550670467	4.95479852281962	0.317859481947153	0.731273339985	1.33461733300346	1.17781849289129	6.15502516630147	10.1786624944396	3.74452550670467	0.249000072163698	24.365695801854	3.74452550670467	2.64807017422043	10.1786756401835	0.495047375570447	24.2031222410587	124.046715783989	147.827996179159	381.693614898438	0.285066764629568	70.191908427562	246.300542877184	67.4682224641208	93.5343952939434	35.7315369183378
Male	Other	263	15151225	2015001059002	O	N	10	15	7451051	FFMM	20	2	51	529	125	125	10	529	4.95053956015795	3.62676928600936	0.0755442151218816	0.0091518220678829	40.5409875707822	142.549795707059	2.19580180736673	3.12980656086196	0.109006136251359	0.601638330858184	0.26913413121936	0.615732204412256	2.15728524593073	5.96856662605178	2.19580180736673	0.154730883142306	6.9584318649543	2.1987409723732	1.25697240161243	5.96880815185984	0.38078987147543	17.4629539126748	38.531384926695	88.160351389415	349.618459333238	0.382858745466814	31.2542465178947	154.903263647016	28.7581791496753	50.9067769866551	19.1923211223173
Male	Non-Hispanic White	222	14702502	2017000779500	W	N	8	15	8361713	MFFM	30	3	47	530	103	103	8	530	4.88768626705961	3.41987250130819	0.249007976705482	0.0546275936012294	39.2079870772973	140.094032892314	1.9692140458466	2.97923334310634	0.0846230181819086	0.419419548971992	0.469993033888781	0.275931096990219	2.05032726208002	5.35243579440932	1.96921408652781	0.211637055039768	5.73927975589929	5.35287822126123	1.10618451135886	5.35287875717113	0.276704314155472	18.910475024259	31.2021037468837	80.4963849318668	345.091397594594	0.344419213619388	29.1005275536944	133.954778556115	27.9640263561375	44.236705888121	16.9889706811027
Female	Non-Hispanic White	160	12101701	2014001112965	W	N	8	15	54586	FMFF	NA	1	21	531	105	105	8	531	4.89570588282145	3.45695126344767	0.547065227081483	0.0288566355310832	54.8178839699004	137.629118257112	2.98094443971087	4.13540995240495	0.219249851471799	0.387691755854398	0.732438336684957	0.784508890454741	3.24506939457679	8.07686608263838	2.9809445029436	0.117905181861993	7.44372785388833	3.2067670770861	1.30817042191018	8.10304710211208	0.433972565000253	17.3894349856505	83.9322067054555	110.626217814918	327.404469212553	0.194671359877662	52.0665880972456	174.846822962464	47.6299698303665	62.4407341730705	24.3993633008912
Female	Non-Hispanic White	152	12801200	2016000785878	W	N	21	46	57212056	MFMF	NA	2	28	532	257	257	21	532	5.1059402360831	4.18706321712348	0.0817481894189474	0.0313192406074528	71.4366759722902	170.248558271378	3.10812174401712	4.30609572678102	0.277274905699449	0.44682162565901	0.945818224945294	0.940293812911611	1.81313272075528	8.44874772080911	3.10812174401701	0.172307287596763	20.7007852265269	3.10812174401701	1.62052086886925	8.44875085734697	0.448047380562032	21.9838731735018	98.7642247847052	122.39883862293	384.029370068396	0.227396666188979	58.5818109797779	222.268863282418	61.5895805325868	75.5182205964781	29.8402508862685
Male	Non-Hispanic White	84	11303004	2015001375404	W	N	16	7	4512521618	FFMMM	NA	1	13	533	195	195	16	533	5.17166217216456	4.29198489894651	-0.124809235591285	-0.00543112943881281	64.5329317553209	175.253069848022	2.6651085491151	3.69560075540199	0.145293571433616	1.04329806024282	0.675163762568866	0.693104654494703	2.35493132762557	7.237995563357	2.6651085491151	0.229286176880181	20.4054051742495	2.6651085491151	1.68769149578387	7.24451613992907	0.376809275226704	23.2139975036844	57.2946030494983	127.959568830752	408.195892991091	0.530521019192414	45.3278577601162	224.375555445653	42.6482183103414	68.0715604376412	27.1971591031058
Female	Other Hispanic	47	10603760	2018HU0725496	W	O	5	18	425410	MFFF	NA	3	06	534	62	62	5	534	4.70102197870192	3.01381545279374	-0.0453242707535903	0.0436212378902572	19.4625320135039	114.966779945391	1.08948194225331	1.6298815280742	0.0765325773362444	0.149904502940989	0.143283568354817	0.226112451919384	0.554468277803941	2.95179733772739	1.08600216897857	0.038104418699563	2.51539164473019	2.95183036419723	0.518508402241229	2.95183036419723	0.131955303849025	16.5835919737658	27.2904925309445	34.0363997058202	286.075808145421	0.0624127591729142	15.4152278582723	49.9482815040221	14.5383232917052	19.9038859729419	7.76636962460049
Male	Non-Hispanic White	47	10603755	2014000032889	W	N	17	15	4622471717	FMMMM	NA	1	06	535	204	204	17	535	5.1767952648338	4.3359005353314	0.0387432579311617	-0.00609572787510781	79.4115475853852	176.037939466642	3.07244057975571	4.65524956421083	0.188451074735668	1.56165455262368	1.33478695592996	0.671675773395566	2.7864685688974	8.29675984103505	3.07244057975571	0.537665095338365	25.2675212266737	3.07244057975571	1.71273870760382	8.35175926083894	0.289653363860009	24.8464063092472	59.1879613830254	150.175710987497	409.566203663327	0.64629859761346	47.3921746728456	238.191921655031	46.6870385156227	77.908816049815	31.4591956057925
Male	Non-Hispanic Black	83	11209908	2016000414021	B	N	4	31	433537	MMFM	NA	4	12	536	51	51	4	536	4.66677537363986	2.90794737198047	-0.1996537293324	-0.0168319473485151	15.0036520677024	104.579068983974	2.0542454907386	1.2042081771917	0.0293758699616287	0.19369736140144	0.100763092593198	0.0880601456713297	0.54724443611665	2.232329905701	0.821842325699022	0.0262014544760187	2.28020198422829	2.2323299057032	0.294136735067863	2.2323299057032	0.0875783797841045	18.2697703739762	10.8346369390936	26.9468743208318	277.142406434376	0.11253066645434	8.656602994213	44.8854273925103	9.58515493085696	14.6957197392384	5.68992953144896
Male	Non-Hispanic White	180	12901100	2015000430618	W	N	7	8	294729	FMMM	NA	2	29	537	85	85	7	537	4.81415879664984	3.20213187456815	-0.0614920144964193	-0.00646143587932261	23.1186548312397	122.449336001043	2.62884401428788	1.71499992184161	0.050647641047267	0.215506473082681	0.0990215102522298	0.300256480836859	1.10289736371442	3.153117863435	1.16001240172644	0.0679392080915982	3.28019418962885	3.15324063239758	0.557009110030316	3.15324063239758	0.0510641045969593	18.9208615800532	18.6752455335856	42.7728657743786	311.951250621163	0.176341500011626	14.8325590152528	70.0202806233027	14.4933764910238	23.1856053331437	9.04668298635828
Male	Non-Hispanic White	152	12600802	2017001147664	W	N	21	79	522152	MMF	NA	2	26	538	261	261	21	538	5.19194062814229	4.36695733363109	-0.435476344707137	-0.036827636884259	50.9824261947063	173.315388776381	1.88803175639657	2.61197279229452	0.107727668265387	0.568630899864918	0.482750843815186	0.550392434719711	1.94890975692541	5.12845256305974	1.88803175639657	0.25502448466524	17.5346605434796	5.13220241491574	1.04836168333332	5.13220241496639	0.292989760545225	26.002949511829	42.8188972812642	86.1391485685328	404.80628759867	0.396930692665258	29.5844692384322	144.365182055449	32.3409124602294	50.214302452068	19.1071781543823
Female	Non-Hispanic White	263	14913001	2018HU0533191	W	N	3	20	38315317	FMFMMF	NA	0	49	539	36	36	3	539	4.56474395286643	2.69596190292437	0.0971534606764309	0.0949882153592147	16.3318201880131	105.607793245843	2.20705118051093	1.2727500560314	0.0675501108159017	0.117273745000779	0.0625953947909271	0.208416835894348	0.326406464316031	2.54557768105307	1.0598691113543	0.0476084578558132	2.10801440350303	2.54557792859831	0.39457963514225	2.54557792859831	0.104144285705965	17.4398471734008	20.7166781155851	30.7836391361292	268.425538876389	0.0522623840363917	12.5304931726522	44.2600890183455	13.0324520836865	17.1575015438607	6.28428333002539
Male	Non-Hispanic White	224	14700400	2018HU1286365	W	N	21	37	585821	FMM	10	3	47	540	260	260	21	540	5.1908201119554	4.36319161632911	0.0511187093711137	0.0103120774490598	82.6248370246923	181.477592612753	2.95111544837138	4.16076171224738	0.172849412936494	1.00186425560991	0.794065403551562	0.86602301763759	6.43524143085387	8.02091841941237	2.95111544837138	0.475914447071857	27.2028005128058	2.95111544837138	1.92277626049252	8.0219634844647	0.284931524874038	26.9978328432695	62.8614249211333	141.0268616892	419.02184268137	0.641986612757767	49.7926436822101	227.029488676004	51.572966510277	67.42686049129	30.9145458285508
Female	Non-Hispanic White	76	10900104	2017000136143	W	N	1	55	32817	MFFM	NA	0	09	541	13	13	1	541	4.32044656427907	2.23931305655672	-0.101587968724664	-0.020048295256912	8.48012413138807	73.7291518902068	1.42535393902874	0.546897618339787	0.0293987433831798	0.0827386465542007	0.0355647275432569	0.0736146456890219	0.191022308127035	1.42535393814625	1.00885972766964	0.00509922993912087	0.380173774161875	1.42535393902874	0.176870155084218	1.42535393902874	0.0394774523520583	16.1723812579049	9.01883158781647	11.8516462720182	205.012946020663	0.022622353964643	5.37379054045315	19.2423120756504	5.71492675908178	6.41369860930492	2.68750656299766
Female	Non-Hispanic White	83	11205708	2014000432057	W	N	14	65	73414343	MMFFF	60	2	12	542	172	172	14	542	5.08655179548988	4.07286822130421	-0.00443955444489749	-0.0127801758791332	58.465022349246	159.77580591902	2.65148805874434	3.3734740518235	0.239415142593772	0.522952276792955	0.657485973395193	0.686336950365016	3.64448220193906	7.19679683712299	2.65148805874434	0.286671618086496	14.8402364448492	2.65148805874434	1.58288754792675	7.20749179446477	0.334931770086335	21.0498908740827	75.6476672371864	121.95932789569	366.171990127774	0.199804852446158	50.7627747902261	157.037613810552	48.8620089379741	57.1451267915233	24.2725164817611
Male	Other	48	10800808	2014001166659	A	N	18	20	184250172110	MFMMMF	60	1	08	543	224	224	18	543	5.18296473691822	4.4969398236257	-0.363614271906635	-0.13429908143172	62.3850430366867	155.814415602238	2.3811067956244	3.50413156971295	0.118552939394632	1.0839436845256	0.573995455155008	0.768377799967285	2.79808440689806	6.47194267148988	2.3811067956244	0.320526380247714	21.2068096935857	3.48306648685161	1.37586601591574	6.47251933416616	0.08227006566423	25.200018895132	39.9963853610168	104.738454008045	373.744776478281	0.459260591514692	30.9978518111688	167.703657929269	39.3662661938045	59.6243182209334	22.2481556775389
Female	Non-Hispanic White	261	15311102	2016001102092	W	N	20	12	202022	FFM	30	2	53	544	246	246	20	544	5.10765235824093	4.17382527037715	0.153330264859714	0.0769559450068634	75.7285726628271	178.50351684666	3.10548192980554	4.21404748599677	0.312736184572633	0.734293749564957	1.19249999527464	0.974674111165111	4.74097383981349	8.44112419182921	3.10548192980554	0.188939239098622	20.6207215715658	3.10548192980554	1.87016815692536	8.44157509838317	0.521726762619561	23.3854494647048	112.69142226081	144.335036192288	397.911911991669	0.256172378294216	64.4682694461494	196.389760456593	68.4426981303438	79.2178900301424	30.8927063086125
Male	Non-Hispanic White	154	12501300	2016000566602	W	N	16	29	48161247	MMMF	15	1	25	545	202	202	16	545	5.17647581747962	4.32957844617042	0.182299773064232	0.117158061666694	91.0927500921483	199.065492604667	3.50834368483182	4.82127429219547	0.235355151034588	1.5701545403087	1.31705849892966	1.28766303691517	5.6042148577678	7.88198103281594	3.50834368483182	0.377841346657543	26.4020456373275	3.50834368483182	2.54613520502574	9.53666688643865	0.458505164975956	24.9646027514306	75.853788081326	203.364156887284	449.124133612015	0.732851132614538	64.9536550831582	292.377874055435	69.0547365383533	98.5970517378779	39.3920454465818
Female	Non-Hispanic White	155	12701101	2017001310950	W	N	17	47	38443517	MFFMF	15	1	27	546	210	210	17	546	5.10059688154574	4.14871123506498	0.118396830417886	0.0452857538668369	71.3150985222743	171.722986589866	3.02207022984018	4.14659587259687	0.2824877008819	0.978377847303025	1.24429927014114	0.797044953925553	2.82058624769838	8.15298496548393	3.02206975977336	0.517786656650608	19.7635697224989	3.02206975977336	1.75323775720156	8.21483731232748	0.425608181411758	22.5980980556923	96.6917239548303	130.011058670219	386.521078441185	0.22217964166767	55.8264322506047	201.85129713364	59.8214860420144	81.792062966776	29.2023415668023
Female	Non-Hispanic White	55	10603735	2017000115259	W	N	18	13	184018	FFM	NA	3	06	547	225	225	18	547	5.09783284001357	4.1654877501943	0.27214399205184	0.0275600931285677	84.5744103095805	168.240235830197	3.52400485083855	4.71809107531171	0.31992658285467	0.939414802105663	1.41624952309974	1.04796676195405	2.93130348895238	9.25575863499438	3.52400485072606	0.509883647281817	23.1963481461053	3.52400485072606	2.00248270346674	9.57923798642823	0.553817841631028	22.9995158610963	110.113429057738	164.396805981656	380.626708283308	0.262417274389307	69.1258757264195	230.877250941343	64.9030528670911	85.2652194632688	33.5332591576568
Female	Mexican American	156	12900100	2014000281866	W	M	7	31	371138147	FFMMF	NA	3	29	548	94	94	7	548	4.84054397141959	3.35157336418261	-0.0286663357959525	0.0103792456666278	27.7408769723512	127.858376411761	1.52543250528144	2.16725710181748	0.114116871502655	0.372182059174277	0.201002202275395	0.344192788033197	0.796755180269633	4.14638051282335	1.52543249806187	0.0486528646603276	3.59875285393854	4.1465554377889	0.941443888131158	4.14655543778887	0.151824562527044	17.1855706939342	40.2081224265647	56.8296160429068	309.812364838751	0.0971559813423621	23.2422134694163	71.663100029365	21.3645339927685	30.6706503968096	11.8149462342966
Male	Mexican American	263	15110702	2016000475354	W	M	3	36	833133	FMFM	15	3	51	549	43	43	3	549	4.60650026576455	2.81892740848243	0.0391794840233089	-0.0518951524313811	17.4285016591383	95.0692062602925	1.02677242992781	1.48056347964506	0.0332753920381781	0.17708714829348	0.0815746342934163	0.185318035382336	0.800725513974696	2.77825934074044	1.08029165960447	0.0263798180175547	2.79638719943013	2.77825955003627	0.460535914216958	2.77825955003627	0.107598452393059	17.0522510600874	14.646970231918	32.0601015117772	258.017585129203	0.126332537181712	10.3036467036241	51.022658458626	10.7794595346979	17.5871931624327	6.59276580943109
Female	Non-Hispanic White	204	14000702	2018HU0726364	W	N	14	27	33341114	FMFF	55	1	40	550	179	179	14	550	5.09534723536232	4.10161817279438	-0.215593393931533	0.00245417084477102	48.7168408764971	163.661685887996	2.09811895107311	2.97195284383103	0.198320065721837	0.435131638199306	0.427752678709454	0.406684770360419	2.38535510945109	5.70191392800451	2.09811895107311	0.21332583740178	11.8411316295576	5.69919374935932	1.31748862435954	5.70327861843185	0.316909357157523	22.2192940498341	67.3842101616412	92.6744455697276	372.831092272972	0.161149843021803	37.2831496890177	130.162804192391	38.8174401002458	46.8996866423306	19.5560995061803
Male	Mexican American	156	12901003	2017000484001	W	M	14	50	4216141641	FFMMM	NA	4	29	551	178	178	14	551	5.1239988563278	4.17361120017364	-0.0761164176680192	0.00593908522650769	60.1893112465168	169.006629430702	2.74818126392796	3.7537568413898	0.14725186093061	0.555261234859996	0.682490267310566	0.70314641119917	2.89411760219256	6.43070376745737	2.74818126392796	0.306049817471857	16.1355766180787	2.74818264375573	1.87859006486047	7.47033119064487	0.464985674130188	20.901507020861	52.0457857615364	121.598024199099	397.234729115041	0.583969603818616	44.7143778896979	185.913597340659	40.6016941445272	70.0037181429337	27.2918259983864
Female	Non-Hispanic Black	119	11703414	2016000435678	B	N	15	16	33381512	FMFM	20	4	17	552	189	189	15	552	5.09029759070834	4.17553018893076	-0.178242485995638	-0.0205589047093229	54.450264276774	159.132738297102	2.469702525976	3.26261335097854	0.205979485927628	0.352056298761824	0.564375907038258	0.669684178155805	3.10015823165102	6.68434415430779	2.46970252597621	0.239518868704947	14.9378151101879	2.469702525976	1.13381469028913	6.71334749799993	0.387376503319494	21.0472966699726	84.6677019311559	107.7307985672	365.066102964475	0.170152087081764	44.8321756919318	159.671934166732	44.9938999933442	59.2661981153174	22.5401169159895
Male	Non-Hispanic White	48	10607704	2018HU0869454	W	N	1	20	33133	FMM	NA	1	06	553	20	20	1	553	4.43743194874075	2.49149450521504	-0.105889628936699	0.0440533151823221	10.8656330412636	88.3658218231798	1.85931953494673	0.742570362731871	0.0227952474158895	0.132616132466551	0.0472506568466208	0.126814928301509	0.258642586253539	1.85931960129353	0.733167458439491	0.0125854005448629	0.646606250538847	1.8593196013097	0.270193791633133	1.8593196013097	0.0858007299818376	15.885301714652	8.47465614434329	18.3382969819944	244.248916517689	0.0833223168497652	6.88515742356516	32.3696430992356	6.80739777999701	11.2957706982394	4.17668978732643
Female	Non-Hispanic White	263	15151206	2014001181711	W	N	16	76	64354216	FFMF	NA	2	51	554	195	195	16	554	5.09403865344729	4.13038158033257	-0.213813114603694	-0.0572405411642837	50.227790328783	153.976210357564	2.28406631206044	2.97884146677455	0.186235003835881	0.67880408359036	0.382122881600919	0.678787543350113	2.16947522834366	6.20758638548177	2.28381545888684	0.252512856411646	14.4095443989525	2.28382237574722	1.27959230935343	6.20805406144595	0.269297315186674	20.9929286025871	71.9551102344867	102.496926970687	356.157486524783	0.168594078634305	43.7825605398649	138.865512344874	40.2628103361925	48.7074302831282	20.3349493380895
Female	Other Hispanic	274	14803303	2014001329810	W	O	8	39	643830	FMFF	45	2	48	555	101	101	8	555	4.87755675761279	3.46470913598597	0.135884162967459	-0.0792310417605917	36.6199545805008	121.307144768547	1.93304206512427	2.84605099759498	0.145254775573345	0.334020839125023	0.400824252839827	0.520355561788423	1.69070401186347	5.23414841845855	1.93303340493163	0.114410788312146	4.6821799092545	5.2545295771115	0.848926336371039	5.25452957711087	0.167893571775735	17.9442947000788	53.9838843809231	69.9856988403755	297.828766885193	0.118831122731073	29.9658814175452	92.0118529532183	28.2575320196848	38.1618027735557	14.3928238798554
Female	Mexican American	190	13601205	2016001487618	W	M	17	22	43201391715114419	FFFFFMFMM	15	3	36	556	207	207	17	556	5.06993404368681	4.07252508540067	-0.0473305559404321	0.0043712783653969	55.9911996601595	159.861101415908	2.24305213686186	3.24812295856941	0.218332743485267	0.629108876211635	0.652834155172519	0.707837108995992	3.24196736713468	6.05169207231376	2.24305205357888	0.254586667921811	14.4065848700636	6.00874952844831	1.49192353691188	6.09724763750491	0.350270650540324	23.9620598732074	72.6831417804835	98.4788354863895	366.318589629852	0.168315525679479	46.4941783309078	138.619252070137	40.8652316875335	57.8312339702586	20.5417916183339
Female	Non-Hispanic White	238	14400104	2017000128833	W	N	6	15	4661040	MFMF	NA	2	44	557	75	75	6	557	4.76023736473559	3.08173431014239	0.710821513292054	-0.0296615017700173	44.3696564907254	113.36082385622	2.30110464204305	3.39583336838013	0.159517447082432	0.471245815452347	0.362306579483594	0.582711727099148	2.24889717697832	6.2333714832601	2.30110178452491	0.139324285271258	5.39023925552678	6.25503396859746	0.824157343399424	6.25503396859715	0.35002880091555	18.2819466015503	56.1513139756224	82.5728642904121	283.073427161035	0.13829751575353	30.7633786530501	111.744602267224	32.8357661955535	41.8974944444985	16.2844952642688
Male	Non-Hispanic Black	202	13603708	2014000195343	B	N	8	84	3813811473	FMMMMF	NA	1	36	558	98	98	8	558	4.87629784562776	3.42206261068404	-0.127696940212636	0.025580570945129	26.9603069259071	134.542268898386	1.43560171500142	2.15671886848342	0.0664620221256625	0.319993403992905	0.303377178921289	0.441478873350364	0.658121354583038	3.89242329925579	1.43508510997853	0.10651720732717	4.15746376568335	3.90096577674678	0.74644936193878	3.90096577674678	0.185145468500634	17.7865513003751	22.8514710053202	61.3274393729165	334.783053130423	0.264370293537648	19.4976842163431	88.9223814195447	17.1187157538576	33.5921410137396	12.0110543655155
Female	Non-Hispanic White	262	14804802	2018HU0174783	W	N	16	20	148363416	MMFMF	NA	2	48	559	197	197	16	559	5.0933274581774	4.13112584747393	0.0791298412636694	-0.0634494711803885	67.3737643207123	152.914354017804	2.77399175704921	4.2379353966806	0.24140289075844	0.572038486233399	0.825331724720235	0.624125656175418	2.14330673459868	7.01980761259448	2.77399175704921	0.354013876420912	17.1609394520145	7.45398621759803	1.62598501560769	7.54049138548204	0.46839405792973	23.2876584436502	86.3530790862065	123.113871908567	354.313784336022	0.18519624637451	50.5795891028672	173.046043356436	49.6661727100124	61.9517210066315	24.5715879289259
Male	Other Hispanic	56	10603765	2017000032035	W	O	20	24	2120	FM	NA	1	06	560	251	251	20	560	5.15328801067554	4.36434438246989	-0.303670286955964	-0.103524117823253	58.0134044768422	155.985630815844	2.21589111411872	3.45044832127499	0.0987026404890698	0.696269685472578	0.619569734409048	0.600481290519358	3.53545830705376	6.02328208799458	2.21589111411872	0.330165705469919	20.2713723697176	2.21589111411872	1.13603443574487	6.0234165488087	0.322723681852428	25.1806205671413	42.4803752765857	94.242510240692	374.052748654923	0.448617086265572	33.9466232808472	148.812991694855	33.8878551470237	50.1021739745401	20.7215040489031
Female	Non-Hispanic Black	191	13603903	2014000140299	B	N	10	51	60143110	FMMF	NA	2	36	561	130	130	10	561	5.00663156159879	3.84378571516206	0.283833177268096	0.0533536913580186	62.0300467362193	157.588192346352	2.94681710516501	4.06306815261604	0.264837031942226	0.681358745417585	0.690419889558994	0.844636790650438	3.64512085711324	7.41813785977393	2.94681710690908	0.403228963377074	8.53642558251524	8.00947556815571	1.72802706228865	8.01027938876227	0.303392997254362	20.0498461636783	85.9692947771907	119.891385934478	362.405360749932	0.231732858836076	58.7435186344331	179.662181325872	53.3874291967616	68.4364201914872	26.6985579015348
Female	Other Hispanic	54	10610702	2015001150567	W	O	10	18	31310	FFF	60	2	06	562	129	129	10	562	4.97337402782199	3.74570818068736	0.05942962971797	0.0430016453768221	44.9314417065643	150.863532997514	2.24843260677549	3.0405311657848	0.221383939312842	0.664496197059783	0.560373684944117	0.626925806437742	2.05952360518959	5.70730895574997	2.24562983416489	0.143146049517252	6.60634494661187	6.10425467856268	1.3076758765412	6.10425467786463	0.303258813000097	19.0083921705204	68.6804928249084	93.6827843323334	350.743848816035	0.16376149615265	37.9032736093603	129.88086903081	41.2568531326014	52.3244775913352	19.6910209759788
Female	Non-Hispanic White	120	12001000	2015000123698	W	N	5	27	735495341120	MMFFFFFMF	NA	3	20	563	64	64	5	563	4.70783252201682	2.97350014505145	0.0784703243685209	-0.00477970590839375	21.1569925827547	110.283333809589	1.21150187227221	1.38304403158019	0.0765092755830991	0.184775085555992	0.173882329597109	0.277339741665719	0.899899175380032	3.29311201321824	1.21164621238171	0.0590505435402117	2.76950293684101	3.29311230773615	0.455855421307878	3.29311230773615	0.137265201812004	16.4463786888126	27.9650329194137	40.1264305939046	277.290041270366	0.0688682431899512	17.8841364002267	55.5743865935041	15.9133474961055	21.6798067271305	8.39820247996285
Male	Mexican American	275	14806500	2015000289638	W	M	5	25	34153833950	FFFMMMF	NA	2	48	564	71	71	5	564	4.74566078156237	3.09788732956544	0.070835375061701	-0.0206492353908606	23.7770945793135	112.731799987252	1.39002868104527	1.78461163700803	0.048971887848945	0.293532376199915	0.090311144869229	0.318509286069216	1.28690777868465	3.41813101189359	1.25746292749	0.0712938450476322	3.53585633491174	3.41813715378254	0.640302367741432	3.41813715378254	0.123328501395509	17.8937883442489	18.1742226815401	41.3533568720774	293.193431405685	0.190418879486288	14.6897182003758	67.5761113389916	14.8264135751052	25.6983827890352	9.21699279523272
Female	Non-Hispanic White	156	13000700	2016000297616	W	N	1	6	1111369745351	FMFFFMMM	20	4	30	565	12	12	1	565	4.30296969588452	2.20772093033789	-0.159871211406305	0.0466112395477403	7.75121588100761	77.4460012489299	1.37645879913513	0.514173681362185	0.0274309492584544	0.0702169916082108	0.0332632905337064	0.103527953582741	0.141169373948859	1.37645879913514	0.622049499251694	0.00587983899306083	0.306644905899047	1.37645879913514	0.202415668637305	1.37645879913514	0.0341339960400129	15.307388271298	9.18236911683699	13.8598892316519	212.716464907501	0.0207522316078938	5.78491522259905	15.813694274363	5.34932690036932	7.15447274937971	2.69283566164321
Male	Non-Hispanic White	84	11300200	2018HU0367883	W	N	14	9	1446396	MMFF	5	2	13	566	168	168	14	566	5.11646646592634	4.08487741791464	0.103678144039195	0.010160622948508	65.9274939710999	168.447998661192	2.88944193916147	4.20024532829484	0.143269467610552	1.21292894295749	0.95137961303943	0.621372564958889	4.91019780439778	6.19489653452884	2.88944193916147	0.304088306856066	16.6724024559446	2.88944193916147	1.8640074915874	7.85431751760982	0.487417883544546	21.8166875677843	58.5853584121593	138.626037212209	396.249563522605	0.652513063751701	42.2200581703636	215.477529107414	42.1547708866086	71.5233906326305	28.623502680416
Female	Non-Hispanic Black	58	10602902	2018HU0400423	B	N	1	28	1739321330	FFFFFF	NA	1	06	567	13	13	1	567	4.32180639734439	2.20313139726379	-0.761534441507231	-0.104760130763109	4.22744146629635	67.8328280017594	0.72694261396416	0.28980118782527	0.0128610713769053	0.0423037493532615	0.0139600401955445	0.0430151347059732	0.0655903806951981	0.726942613964159	0.570071352911894	0.00328460923556095	0.113480183919584	0.72694261396416	0.0948915104837527	0.72694261396416	0.0172767380535106	15.8078190739746	4.1959457303948	6.47051174393397	192.58914291824	0.00960552211250889	2.64651406743746	9.01233935651584	2.46135040109142	3.37689259551025	1.28758958607934
Male	Non-Hispanic Black	190	13602401	2016000080766	B	N	12	18	12124346	MFMF	NA	1	36	568	154	154	12	568	5.07107538759892	4.01007851323634	-0.259918791658405	-0.0566804855940609	42.5278740767816	150.565002614932	2.07619634603616	3.23464029774857	0.102933823695254	0.686594328775409	0.404892407754775	0.419758584533642	0.824385546907681	5.64363399800616	2.07619634568395	0.123002621333979	8.34982032129052	5.6436867987616	0.969626694083356	5.64368679877876	0.102700619751031	19.4835511604816	35.1404568066238	91.3837820005922	364.260795962793	0.381757565576738	32.1029914972633	146.605776079479	30.6778494315145	53.7597677079942	18.9069233363235
Male	Non-Hispanic White	156	13200401	2017000842311	W	N	9	16	290929	FMMM	NA	2	32	569	118	118	9	569	4.94165436046819	3.57209241650636	-0.125247659966324	-0.0511157729522083	31.4011575391864	133.025200473289	1.72251601525763	2.3996902133532	0.0762438830699828	0.535180966996037	0.30806530985351	0.316305658334356	1.7102743053658	4.32737191922737	1.59289589938732	0.0671424178296537	4.81604883657584	4.32993997792445	0.806242728108998	4.32993997792444	0.119521101138081	18.7132515380479	25.1281605175392	62.8866716260854	331.947839837865	0.284211148683049	22.07416357643	95.6115485032675	20.1532981767472	32.3129172867526	13.2189588221839
Female	Non-Hispanic White	156	12900500	2017000948811	W	N	12	11	125849	FMF	NA	3	29	570	154	154	12	570	5.06473711424813	3.97479631329125	-0.12498383387048	-0.0355643591553528	46.9842518913219	152.806551953931	2.32676723672633	3.09860713121136	0.199108466353496	0.473445456178886	0.480288076004761	0.573237936282731	3.29833997126453	6.32383290518337	2.32676723672662	0.159559947024649	9.68860371162627	2.33752890120637	1.54654882603424	6.32480909864705	0.361933110812033	19.1929316992734	67.8658284305907	104.512847257401	354.126428850173	0.166069947663108	43.5823228068301	130.846746444352	41.148768487613	54.5032510256261	20.599244307687
Male	Other Hispanic	189	13903200	2015001023442	O	O	18	11	1851	MF	NA	2	39	571	221	221	18	571	5.15776222110511	4.31209937389469	0.115074057084855	0.00841210756948981	83.6945139364183	175.243130818299	3.18554594063071	4.77805455368554	0.183921784102266	0.888020585038849	1.13658456091092	0.725786071045939	5.69450873056464	5.77313896861978	3.18554594063071	0.145564361603725	27.5228569071309	3.18554594063071	2.22707921181732	8.65921164411909	0.686804996465282	25.2732088929936	68.8629064587464	158.806860754999	408.17853052829	0.653067864298844	50.3962784181391	241.310013061146	46.8130015266645	88.276867399817	32.5067865244251
Female	Non-Hispanic White	191	13604001	2014000689081	W	N	16	98	3733160	MFFM	NA	2	36	572	193	193	16	572	5.09494728109551	4.12928871908491	0.204994452949162	0.0237854857777941	76.2702666295497	167.12345100096	3.35453991045123	4.55499031301511	0.30407559015815	0.810934167773243	1.18603350510714	0.939194952082812	3.8362704728602	6.04370262788635	3.35453991045132	0.262190114275036	21.2504542001127	3.35453991045123	2.02162449318919	9.11858488136012	0.499023960614221	21.7364314229579	115.544252566915	153.348730830172	378.730171074012	0.246069692316448	66.6132832621347	219.000974972691	62.3153567689559	79.4691783153754	31.7616368539949
Male	Non-Hispanic White	46	10603715	2015001392268	W	N	8	57	8535412	MMFF	45	0	06	573	101	101	8	573	4.88108668161798	3.40005544172456	0.154795883372293	0.0653245944274061	34.9826185436186	140.66923395206	1.75324378754148	2.60714528944557	0.0827519128584667	0.695502493452844	0.362239026084457	0.473930426457818	1.94943940973219	4.75919063812863	1.7532437948802	0.123468517940623	5.07180152357368	4.76581072853271	1.03257469686035	4.76581072853271	0.150558889782429	18.9530776356988	29.6638036000804	76.7525530138686	346.153515837276	0.292012027129455	21.6004355505122	115.006630032639	23.2626449523115	40.6635321284527	15.1722875294336
Female	Non-Hispanic White	59	10603762	2014000021062	W	N	13	16	42684561311306	MFFMFFMM	NA	0	06	574	164	164	13	574	5.07485325712623	4.03110151403789	0.0419036996469143	-0.00803445976121772	58.7332034653157	158.668766126426	2.73436574010062	3.36454448932662	0.255321522126792	0.627640914296186	0.785690387381755	0.716746280064857	3.93791926954307	7.01467721112089	2.73435768404617	0.264554989823651	13.5698585867825	2.73435843480948	1.82873286056506	7.43275480505004	0.449236054642275	20.4797075773954	89.6676377991926	117.419126571958	364.267513432282	0.19622026928316	49.1825615286876	176.77265349	51.0558710057384	63.1222857712057	24.9009418600488
Female	Other	269	14806801	2015001295969	O	N	8	25	6113829	FMMFF	30	4	48	575	106	106	8	575	4.88553637177996	3.39216864214907	-0.19509900240084	-0.0256202855546325	24.46074627349	129.013375653806	2.80084880460428	1.8814972100869	0.108815674697571	0.395581626281766	0.201747581969018	0.293540573317743	0.669907816851083	3.41081038351379	1.25478552360386	0.0726732928381732	3.06070547373759	3.41086068733775	0.608265151669086	3.41086068733775	0.174842282414727	18.4878713369754	33.9230119135493	46.7214047524618	311.90900398224	0.074717733553306	18.7870275152797	68.1897954630633	18.9585854733757	24.6072791237554	9.78447257171262
Male	Non-Hispanic White	228	14701601	2018HU0611957	W	N	12	26	1243381	MMFM	NA	1	47	576	144	144	12	576	5.03332432500932	3.84522976327958	0.0852773850977461	0.0103931404763029	50.9328016080518	155.045320652179	2.52598648824108	3.80484985270666	0.131606494200044	0.603686986410502	0.657761617546034	0.852184292369078	2.98171140451209	6.66388724077394	2.52598648823889	0.247981133573145	10.2424300386583	2.52598649583568	1.45247171588248	6.86634316991237	0.277129973456599	19.1635289203626	45.2866736074276	112.380255054186	372.360326887704	0.447835685100041	38.6510829023007	169.662932398155	36.1250586107274	59.1131774978348	23.5144288618639
Female	Other	275	14806100	2016001052001	O	N	6	14	64134	FMF	NA	1	48	577	74	74	6	577	4.75356131342592	3.07477387689834	-0.288432256550471	-0.0397892279883996	16.221566467972	111.471849195179	2.4185545390145	1.17545205048427	0.0658997171342091	0.17421612138636	0.062730599506976	0.164079505256776	0.670504417490349	2.43533345360426	0.895911558365798	0.0198067593944204	2.06350500656857	2.43533523060053	0.429026373400919	2.43533523060053	0.0928220954499905	18.1062503449086	20.884402437619	26.5578983292921	279.528286322861	0.0493972082048286	12.817050697609	43.049051926655	11.8323110196587	15.5727715087405	6.26080302366366
Male	Non-Hispanic White	118	11702801	2014000453358	W	N	6	8	663940	MMMF	NA	3	17	578	83	83	6	578	4.80611306184923	3.18217313908675	0.057092266105448	0.0539189896235681	25.5149716956206	129.028337589357	1.33921752650221	2.12030980846151	0.0587219192994874	0.398539997500927	0.174798807356136	0.418071590519518	1.07917894685633	3.63735514616672	1.33894721893461	0.0287765476552049	3.75393564230303	3.6396358722105	0.694272457541926	3.63963587221049	0.24895625906075	18.0559949095573	23.5482566205636	49.6750479636306	324.439132583881	0.218066020691655	18.4308975453	83.0103232705881	16.7229157243615	26.9945287163518	10.8601717906726
Male	Non-Hispanic Black	55	10603708	2018HU1084706	B	N	19	6	19562859	MFMM	5	1	06	579	228	228	19	579	5.17751994397156	4.41524513892761	-0.0877153883349855	-0.0117738113588726	75.7569167606554	175.168108463091	2.74397297635289	3.90919243627126	0.156204640666607	0.705816127336802	0.935646158001603	0.896992889874564	6.54241571159511	7.45790610959593	2.74397297635289	0.448467921013123	24.4767884036663	2.74397297635289	1.60184269228964	7.45889187889286	0.420738064976599	26.6084777122502	58.3428767565422	138.14668543952	408.047466245375	0.562782889065849	46.4509668584441	212.501477685596	43.4502849452505	74.8975787077397	27.9917805111644
Female	Other	59	10603754	2017001352323	A	N	9	25	38151433913	MFFFFF	90	1	06	580	110	110	9	580	4.89801049748233	3.41870678197779	-0.349576047983591	-0.00469151713275958	21.5231851677318	133.395577445509	1.50087640280654	1.51307158619532	0.0972116286392281	0.379998105292061	0.16147107063396	0.250083305378094	1.28688872905221	3.05246511208444	1.12295698359631	0.0409138811528453	2.9684866206564	3.05251355817323	0.601139672869908	3.05251355817323	0.117958404800989	18.1080136337302	32.356144351296	44.9336092092098	319.821702863421	0.0738464911785316	18.0223375428573	63.8499355810422	18.2730204337736	23.8944272975348	8.97865035523258
Female	Non-Hispanic White	84	11304500	2016000526318	W	N	3	6	12493542324	FFFMMF	NA	2	13	581	37	37	3	581	4.57158304136198	2.7075259289085	0.0387651206893926	-0.00991482750655601	15.5847215979471	95.743066590881	2.36610189297979	1.19478501802131	0.0519002983880182	0.0961619096993735	0.0777559523068153	0.172748798836099	0.546832223518312	2.36612451084546	0.870464538179099	0.0324094637976632	2.01125036369961	2.36612476157293	0.362476200298454	2.36612476157293	0.065873006395998	17.904239966252	19.1738116067957	23.7915651878714	249.391908059912	0.043180942670942	11.6826528313252	39.3828138731988	10.4329749928938	14.3762826603991	5.42707127364891
Male	Non-Hispanic White	44	10603764	2017000209533	W	N	20	19	20515423	MFMF	20	2	06	582	248	248	20	582	5.16913418678942	4.32483865889888	-0.214156509926758	-0.0435435213153701	60.9883064936746	168.273505653502	2.32106488416885	3.63258890926607	0.129551724160498	0.834719850946301	0.786231950427857	0.623926768177264	3.43910860180934	6.30782412559591	2.32106488416885	0.398884169777108	20.7616408129265	2.32170519498031	1.38994574362314	6.30930841992974	0.436458191727599	25.2760024114625	49.2175421399224	102.332293443337	395.941671462918	0.490650726011531	38.1704286518261	175.302960999561	33.953008907073	60.3676216780719	22.9751577452925
Female	Mexican American	263	14935001	2015001413474	O	M	0	20	03231	FMF	20	1	49	583	9	9	0	583	4.246227717137	2.14303467052027	0.242781600407409	-0.00159722221579655	10.8679302207474	69.7299897976849	1.79318804911306	0.241176315011596	0.0326657462863823	0.0923682392772597	0.0337563072223879	0.105837417979562	0.240584846538103	1.79489011019452	1.7865107506905	0.00957185600954035	0.552533510757642	1.79489011019455	0.207985174923481	1.79489011019455	0.0498036235187686	16.4590005060624	11.4934060098561	15.709260480001	196.614959897739	0.0259262304879785	6.25121812755136	19.8830009429591	6.63423959691422	8.52563709712792	3.24563703570065
Female	Other	12	10500200	2014000358042	A	N	0	47	520025	FFFM	NA	2	05	584	2	2	0	584	4.07269065438041	1.7140049455958	-0.0261632474176457	-0.0103583051081446	5.40779644366898	58.1096852297473	0.956466260553982	0.132342293951509	0.0156271820513904	0.0473674759023495	0.00955736689856539	0.0536909008536645	0.0404267025628394	0.956466260553982	0.946960261006029	0.00204295990324448	0.123832415426766	0.956466260553982	0.101071014192388	0.956466260553982	0.0195807414778923	15.3689841566567	5.42051277858801	6.68320839533099	171.489782685313	0.011151717525043	2.95732412631698	10.3534734512558	3.20363731517368	4.18634753016247	1.50852819463922
Male	Other Hispanic	274	14801904	2016000540681	W	O	13	21	13432050	MFFM	NA	1	48	585	156	156	13	585	5.06222917278285	3.95049968841755	0.29259190421825	0.047897842820832	69.6227646826725	165.691398930299	3.2199359208994	4.93813788136886	0.178643844011645	1.14711529187699	0.546410897611348	0.571496258187115	3.30858227549298	8.57652933443886	3.2199359208994	0.26660955925055	15.5704897249399	3.42660673828283	1.67820654707519	8.75269330011362	0.46493574436342	20.6224069028135	63.9942746729565	155.248996077612	391.376169849294	0.680937089681102	48.2743557835065	252.335837709253	51.7377530102822	72.139433057531	31.5051546970442
Female	Other Hispanic	48	10608101	2016000147163	W	O	13	61	541354	MFF	NA	1	06	586	166	166	13	586	5.05862911039933	4.03311992582912	-0.0461939384471661	0.00743656958240608	53.888979087146	158.549314906515	2.28997555915882	2.94800091043558	0.205370432957023	0.483351763962303	0.482001448542658	0.711137890607338	4.78675820913005	6.20271944289723	2.28851511837214	0.118199774269583	11.4139288880367	6.20886629668559	1.12627628872141	6.22082906040969	0.318222946844641	22.5475739943593	71.6880307305131	96.0824351918909	364.061819382267	0.18106187322593	41.5857491742004	127.139039475487	41.7725020863211	52.6099992065133	20.8290244419551
Male	Non-Hispanic White	228	14801300	2018HU0398027	W	N	10	21	49151046	FFMM	20	4	48	587	122	122	10	587	4.95695107253479	3.62302682568116	-0.139986333072703	0.0133567943502456	32.5585658115843	144.071235306376	1.61322961338274	2.41332131361095	0.0774733412268239	0.483190232544357	0.170860248197069	0.395651360757473	1.99858747255362	4.38500078223593	1.61322961338274	0.123268595781415	5.11344814452627	4.38521274319032	1.01465827649214	4.38521274319029	0.304342842019532	19.1822266747382	29.952212307995	70.5452369445284	352.413360835446	0.290047407326499	23.0840310511854	103.516216957596	20.6675049711306	40.5889646503766	14.213091746287
Male	Non-Hispanic White	166	12401106	2016001383278	W	N	14	11	1814411541	FMFFM	10	1	24	588	170	170	14	588	5.12293311977678	4.09980208736491	0.00512337241959883	-0.0317910621701902	60.638224392828	162.575426573196	2.72935975937622	4.16164741938744	0.148907555089386	0.606268447180724	0.710481012248895	0.961131918589601	3.18039195118711	6.76447030647799	2.72935975937622	0.364452033968743	15.9144542719884	2.72935975937622	1.45907387404262	7.41916902241442	0.251671654470699	21.2170141493866	50.7357787356152	123.173418350482	385.84296112452	0.560589412864643	40.4427196276962	209.108779321831	40.3408281387924	64.3524985127377	26.3276062882958
Male	Non-Hispanic Black	94	11000102	2016000373050	B	N	14	175	23145656	FMFM	NA	1	10	589	171	171	14	589	5.13228436044325	4.1482188286021	-0.0730971182865662	-0.00532853784166496	58.8576437348145	168.503382302292	2.52560393815623	3.95736086202614	0.130724477151568	0.79512321315928	0.50495780227847	0.588674816551586	5.50227566254772	6.8545991365905	2.52560393700796	0.271962935039611	14.5081866572946	2.52560396611229	1.4417143603268	6.86530328785335	0.347743198863095	22.3043839029087	48.2316211247489	119.305203595146	396.347271013819	0.483637494836229	41.6457049657259	189.004313603068	41.7214574086887	57.8590006898976	25.0254057023715
Male	Non-Hispanic White	152	12702500	2015000923513	W	N	21	11	462148	FMM	50	2	27	590	260	260	21	590	5.1908201119554	4.36319161632911	0.0633393009081479	0.0108446297441616	83.640756332909	181.574264660384	3.05098639784096	4.18510119870068	0.192122607372345	1.01194481635952	0.908309670472994	1.02623343465524	5.50116859561117	8.20062717623251	3.05098639784096	0.547496354784088	27.2364041789727	3.05098639784096	1.85701410520151	8.29344088394659	0.48316765502457	26.4143327522199	68.0866157911819	158.947781135088	419.189239392471	0.624986047499278	47.9497689455009	254.682512095145	53.146221728521	87.6546351981486	31.9735166876932
Male	Non-Hispanic White	154	12202500	2016001368628	W	N	6	18	3136384117	MMMFMF	NA	1	22	591	74	74	6	591	4.77413380126804	3.10383534744465	0.235949552530024	0.00215039007635437	28.2130574233143	118.662602303314	2.8725357310686	2.14001007756233	0.0581056878852629	0.368133399308017	0.0823409821549423	0.249295559053884	1.04343365241634	3.88418349957006	1.42891127292446	0.0720132898107102	4.08717189345731	3.88418353307278	0.625348175128431	3.88418353307278	0.209534254290896	18.7444392554245	18.0594112673889	56.7973239991917	304.687618624203	0.217956568411286	17.6287906873561	84.9802338712805	18.7146146124399	29.8940803443858	10.884289283409
Female	Mexican American	259	14802101	2014001418714	W	M	21	28	215753	FMF	NA	1	48	592	262	262	21	592	5.06487880656813	4.20447238154265	0.183050891168218	0.026604645348569	80.440941781461	162.630938373959	3.2840333768053	4.16412857623629	0.3106127631406	1.20433915204319	0.961259631670884	1.10943673721328	4.42888396098736	8.92400752972847	3.2840333768053	0.428262299692765	21.6918709132866	3.2840333768053	2.35885908897857	8.92692825199381	0.380194698685394	23.4945567087122	104.602836124201	146.547316466111	371.068623919376	0.265465305798886	57.0399276055702	225.063291752374	61.1726195856239	84.3168053876789	30.4650436509111
Male	Mexican American	262	14804619	2014000753064	O	M	4	11	2115441111264950	MMMFFFFFM	15	3	48	593	48	48	4	593	4.6406656545611	2.87395239863807	-0.397285413168059	-0.0953303693679377	11.9015302640777	94.1920030996008	1.70369163920701	1.03780893855748	0.022589442282475	0.171663691459317	0.0449547349766731	0.108380061202208	0.476102878531094	1.73533196945544	0.638392982812098	0.0149383535170072	1.77395443773742	1.73533196945567	0.245823696869006	1.73533196945567	0.100134403971513	18.6429536348863	9.02016170259837	20.9035839120487	256.229972399731	0.0819232698895748	7.06060947103981	31.1644738514438	6.56026463627122	10.7650299520281	4.08938523208665
Female	Other	47	10605917	2015001262895	O	N	5	11	6265735536	FMFFFM	NA	2	06	594	67	67	5	594	4.72516738386463	3.02682476010851	-0.0162082725722444	0.033152078473928	20.2999107104134	116.549894738707	2.82704711022516	1.27553009053839	0.0716687479418028	0.206710868748766	0.114843480197419	0.262653322704434	0.744425166971372	2.82655154282831	1.04018080015844	0.0548262150148829	2.41180586992509	2.82720234225869	0.57119426497382	2.82720234225869	0.113163273654055	18.4288928056708	26.2554515477123	37.2685408752366	289.025241015351	0.0615799697345514	15.7234700868456	48.6954259882774	15.8867505109629	17.775905596784	7.5151592985642
Male	Non-Hispanic White	228	14701300	2016000820530	W	N	8	78	153511358	FFMMM	NA	2	47	595	101	101	8	595	4.88108668161798	3.40005544172456	0.642685154588903	0.0370134855585269	56.9822944737416	136.742578214734	2.76380600741419	3.67156272432224	0.121069082228274	0.907213705806674	0.847677526714532	0.643363244541834	2.72975166398909	7.50825524794262	2.76380600741419	0.107887936073824	8.0230352676227	7.51257166184919	1.43815253709499	7.51280364719168	0.265595840330153	19.6173278156571	50.9434989305859	117.665979354898	338.881006469621	0.47042449018754	37.5367417699207	184.235640992139	36.8256558525383	60.0495315411268	23.4150340369826
Male	Non-Hispanic White	130	11600400	2017001365088	W	N	10	73	1846685410	MMMFM	NA	1	16	596	120	120	10	596	4.949587676935	3.59803402034031	0.187929257572033	-0.010309533067196	44.0781095845609	139.669391954979	2.13332854889021	2.99336938224698	0.0944905018665708	0.464240898670843	0.645350870579065	0.690038299349349	2.32360645678054	5.79874970592908	2.13332854889021	0.0727508669254641	6.87747746430398	5.79898822858115	1.35801510461292	5.79898822848079	0.342502719016208	19.6616602052051	37.8638734833192	88.6478966938662	344.306591538852	0.373964304807632	26.9537100662627	137.680415386956	30.3353987129553	48.2459196127595	18.3629770325228
Male	Other Hispanic	262	14804632	2016000718366	B	O	1	18	133336	MMFF	40	2	48	597	23	23	1	597	4.45861869996488	2.53369593368259	0.572568667416281	0.0958411082782558	22.3374490842581	95.0553932242942	1.29806256010677	1.47706904618577	0.0444798729806703	0.296489893035165	0.124525268020091	0.258590911507431	0.975483916860522	3.38303887027237	2.07443611567742	0.0300467435175519	2.30186155576959	3.38332681569604	0.591331346507059	3.38332681569604	0.143953503614067	16.9305670881922	16.8311105040078	40.644889785356	257.989468209978	0.16128716645509	13.5096965026563	63.6515219876348	12.3143576666794	19.6543914359944	8.02770592827741
Female	Non-Hispanic Black	190	13500200	2014001000403	B	N	21	5	27121	MFF	NA	0	35	598	256	256	21	598	5.1068605038743	4.3147043125784	-0.342946194962212	-0.0174565169268369	53.0777658117388	162.293104413377	2.23900416174379	2.99012538866574	0.220755034385669	0.363212596582138	0.214181670132733	0.695670008787759	1.77862560550467	6.08545841010044	2.23871541553758	0.157678042688707	14.8186920248295	5.8805647278302	1.19183364024103	6.08545943314695	0.294251646407689	22.7090277055126	70.7743112390572	99.6188136607035	370.49035681544	0.170054011279233	42.8386959679739	142.371178240473	41.1129874273224	56.9327892916841	20.7355618277686
Male	Other	48	10800600	2016000375957	A	N	9	18	36978648	FMFFFM	NA	2	08	599	108	108	9	599	4.88641128955593	3.40934342054836	0.16259285983638	0.0235140525058542	35.5854298563545	135.629288227449	1.78675461125614	2.66792060291632	0.078502333138536	0.652125545815501	0.318452004897506	0.443919880203981	1.85379412111868	4.85680682868124	1.78675461075985	0.112355187084383	5.38170315318745	4.85690191398029	0.964327300802496	4.85690259034387	0.193079769760095	18.916237574752	29.7566401957667	73.6149085705827	336.80964312374	0.30101196063073	23.1241318428091	129.17287219121	24.9387034717584	41.5212925538686	15.044904569993
Male	Non-Hispanic White	154	12401003	2018HU0985587	W	N	9	12	4654914	FMMF	5	2	24	600	118	118	9	600	4.94165436046819	3.57209241650636	-0.224523299290046	0.0183256045722728	28.433530985118	142.590939064676	1.46235478464143	2.27670372293789	0.0693962306855514	0.423560288788279	0.20050306648909	0.36663144650094	1.36392082820806	3.97509174247883	1.46235478121075	0.104417290037953	4.39215225867515	3.97509242852537	0.793809250374455	3.97509242852536	0.175839730898869	18.4436611379891	30.4559239338023	59.6092738308519	349.69413793205	0.234344449298699	21.804012879744	93.2444082237227	19.6640829851357	32.0885923595458	12.7844223641576
Female	Mexican American	251	14500302	2018HU0534014	O	M	4	44	2445215117	FFFFMM	NA	3	45	601	50	50	4	601	4.63113193064647	2.83231426456812	-0.0690673578630493	-0.0319327256461067	15.8512269386371	99.4046809891966	2.40140242053184	1.14712172507517	0.0606042398983152	0.157958700853518	0.0922232888158626	0.195172503103941	0.41676459648246	2.42918452280705	0.905179778092703	0.0405485565540966	2.02397084775196	2.42918584614108	0.395501064254606	2.42918584614108	0.0614487403007475	17.7376721565071	19.2721962322548	27.5887924129985	256.511585298967	0.0421666710332685	11.8009021865758	39.4741907969028	11.1851061364931	15.9834062016412	5.7307736256021
Male	Mexican American	274	14802200	2015000079892	O	M	14	12	17461453	FFMM	NA	0	48	602	175	175	14	602	5.11919639759345	4.16538643998676	-0.0461224204245416	-0.0359759945010505	61.5139525345793	161.292647784713	2.71891795034715	3.97836518898327	0.145308491715306	0.883787970600493	1.03341711535894	0.984412214168648	2.32224779594551	7.38881949758514	2.71891795034715	0.241469221600175	15.8317643805727	3.61010976398011	1.48869420190585	7.39078525193408	0.197202271263191	21.6244240017339	55.4538640119217	134.501573766018	383.557371490863	0.519598113127597	43.7505831178035	205.47706484962	40.0293925808337	69.2499695643508	26.0715255583619
Female	Mexican American	185	13800200	2017000490223	W	M	14	49	7111434	MFFF	NA	3	38	603	176	176	14	603	5.0659159856319	4.14235636322045	-0.15572046969463	-0.0454485725091312	53.8733484926786	151.482091966753	2.29793833393819	3.22072348246292	0.193577342592719	0.426836459756504	0.491113510323968	0.695841136922855	3.00799315232425	6.23693830027764	2.29597186572812	0.192174476354337	12.7153366490521	6.24109860126169	1.26698807506105	6.24109860125921	0.240237094402782	22.4642894788243	69.9082171420704	94.9913509784856	351.821866540031	0.16157331701536	42.4105228436311	131.081919731009	40.446578303551	51.6060984061873	20.1943276830958
Male	Non-Hispanic White	226	14203001	2016000893495	W	N	13	19	47165113	FFMM	NA	1	42	604	159	159	13	604	5.08518370856843	4.00231886882814	-0.376062082222121	-0.0627613419924155	37.5719133768676	151.778522064661	1.71919714318899	2.47515389877412	0.0811683074951898	0.507505218499287	0.300772829087148	0.490274577445676	2.00709922790939	4.67169270537295	1.71898928372826	0.0466824699567582	8.36952951547766	4.67269733327436	0.825177335360644	4.67269733327436	0.258758240182779	20.856979407734	32.0227413301556	71.5210286457398	366.46047899816	0.350008399148485	21.8482098615047	114.818643732703	26.8804426656733	46.7226677819836	15.748540907694
Female	Non-Hispanic Black	46	10601906	2017000905806	B	N	19	75	12194446	FFFM	NA	1	06	605	231	231	19	605	5.09915715736832	4.24797862962262	-0.146286105114294	0.0200612815698433	60.4425014883175	167.204637906003	2.58731904313866	3.45139744898706	0.25691173081747	0.427818163375144	0.83736793026711	0.722195303117188	3.88863886552401	7.03305238971133	2.58731904314114	0.330864682069099	17.0392513422493	2.59124738029297	1.4553933828456	7.03306233938986	0.263293749800591	22.3610546208398	76.0235668476904	120.001668579426	378.86815020037	0.200586693655945	49.5584564611878	169.543536058117	47.5186801622296	60.2117157158264	24.5063194963034
Female	Non-Hispanic Black	202	13603107	2018HU0061387	B	N	16	108	4016844	FFFM	NA	1	36	606	201	201	16	606	5.0928483982058	4.19332197642121	-0.0714967036721417	-0.0085357285774298	61.6717072802269	161.468918596216	2.52315527063078	3.15455080033376	0.218546555309597	0.602140255746302	0.54654053486088	0.684930038850125	3.17968499994554	6.84705037237962	2.52315209972583	0.194248494063599	15.7906633372751	6.8498110395865	1.50922844912025	6.85863850312301	0.352680836814305	23.4423264403791	75.7994362078408	103.725180460198	369.078341435365	0.178906358916148	42.7338805967471	149.785708793008	51.9044121559531	56.3029674774468	23.2810198038992
Female	Non-Hispanic White	172	12201400	2018HU1257013	W	N	5	16	3253	FFF	NA	1	22	607	62	62	5	607	4.69838562974303	2.95429238279469	-0.0450074888344099	-0.016301062677905	18.3436762019931	107.994960831183	1.16479032015247	1.2394423728077	0.0683137899695003	0.12993207236168	0.0892373821467748	0.218722966838747	0.796348202480986	2.6301942031594	0.967594374336428	0.0295955073133552	2.21978767212693	2.63019420321551	0.37537331661995	2.63019420321551	0.0912425898980039	16.6548894826995	24.1862529801223	29.7537218400608	272.963435958488	0.0512044350046392	12.1119920285457	44.4260903848337	13.3568096020806	16.7320468191605	6.60294712114893
Male	Non-Hispanic White	150	12901805	2018HU0414752	W	N	17	21	6417	MM	30	2	29	608	211	211	17	608	5.1759144694258	4.35267937180686	-0.190707212526603	-0.11735510733068	64.1980065300647	157.363648908239	2.57358555362861	3.42503060656832	0.137853331533831	0.782776608224876	0.722834223664863	0.7052225626037	2.8791817578489	6.94930084285464	2.57358555362861	0.293827957916541	21.022673225508	2.66176415112193	1.80710362317633	6.9957308443997	0.328654211413391	23.9449669312719	46.5995643062049	121.556237721832	376.528382146462	0.472076925511643	39.327626535153	194.218429024824	36.6844310055775	67.3430898158655	24.2257001205822
Female	Other	258	15500100	2014000507788	A	N	15	74	151645	FFM	NA	6	55	609	189	189	15	609	5.10189399999225	4.10987893417449	0.291911859146246	0.0206958148005516	81.5968610185917	167.769298892395	3.57736633315454	4.47741605033946	0.348396343829822	1.12862995370765	0.708910001418427	0.89380239795764	5.29836449933476	6.11788928894903	3.57736633315454	0.364435346521091	21.815113855419	3.57736633315454	2.14000358092183	9.72428989715101	0.550756885970705	21.8091991201357	119.657035839906	167.059333320572	379.827342563822	0.278697269141534	65.4248133515781	228.748223095162	64.4542123443142	90.5622152020381	33.9695386924844
Male	Mexican American	274	14802003	2015000058138	W	M	8	30	8424810	MFMF	NA	1	48	610	97	97	8	610	4.86438455565904	3.40772721340849	0.140714562879221	0.111591914060052	34.7591127932772	144.890237023783	1.78402032558361	2.73768727504639	0.0855999014999726	0.508267011979504	0.475355038126257	0.469822584537147	1.26011544463009	4.82338308067739	1.78402002350933	0.117348496447733	5.21739287761223	4.84946918770469	0.911136450684403	4.84946918770469	0.187491105497242	18.4835890324915	32.9461866698325	68.5971989450647	353.914818794201	0.27731920569109	24.8092652650613	112.882020464612	25.432512303025	41.4505060675645	15.7847780061451
Female	Non-Hispanic Black	154	12500501	2015000024695	B	N	4	33	642440	MFFM	NA	3	25	611	59	59	4	611	4.70556837629792	2.98572574142449	-0.098018813979114	-0.00479151590934212	17.9520969070441	110.032619241054	0.915351884822413	1.29076592790419	0.0644198154049707	0.231689547178945	0.0788018927333068	0.178851377034594	0.916019633177773	2.48801904381096	0.929132142046005	0.0466611690315907	2.12299211015491	2.48807443723042	0.408048588703749	2.48807443723042	0.088821447701687	16.942884776313	22.6152179718844	29.9856618405361	276.817120123928	0.0521099333818501	12.7861621656732	39.9519028701856	12.7798076406451	16.6536181200302	6.33434687637342
Male	Mexican American	264	15311606	2015001145155	A	M	1	13	447142	FMMF	NA	4	53	612	22	22	1	612	4.45178379057519	2.5287171362811	-0.430795221548339	0.0146825170573377	8.14921753552568	87.0485759971131	1.39254706539524	0.625352335567262	0.0163696320258918	0.130353693638364	0.0326601212694154	0.0803784768308738	0.105807600873044	1.39255192438787	0.730986903521986	0.00818430068871461	0.402428385008186	1.39255192438787	0.211792215868853	1.39255192438787	0.0384867183534419	15.9073924318597	6.53943818378095	14.3506381633594	241.51308111634	0.0581914081314463	5.03417954159984	24.5212866372486	4.61267981341322	8.02414207954708	3.09312579689407
Female	Non-Hispanic White	46	10603706	2016000767863	W	N	13	47	44204813	FFMF	15	2	06	613	158	158	13	613	5.06784264756041	3.99921294467994	-0.459470770692423	-0.0123729810413605	34.4580338680028	156.878193479306	1.58743774376299	1.9538050334354	0.148969533460528	0.45967527642952	0.395372034428951	0.469411833017571	1.72341121361681	4.31507992633719	1.58743774376299	0.127820878853546	7.7680063412167	4.31510317268096	0.893192128066456	4.31510317268075	0.239870817499547	20.706699336513	47.8726515404364	68.6609736437314	361.180082191295	0.110534708350546	28.4391459502747	94.4419124168816	27.29252716852	36.7058248026218	14.333772369147
Male	Other	120	11902100	2014001199960	A	N	10	25	394010	FMM	25	0	19	614	129	129	10	614	4.96732152266812	3.67761309477047	-0.181249701551822	-0.0492524421323169	32.9952427907489	136.738327413408	1.64551463378482	2.50693385544527	0.0753360172777529	0.318167920515505	0.462403994586568	0.501712456698326	1.83648515352642	4.47295090041262	1.64551461768503	0.10292011264865	5.28156664607388	4.47297248185496	0.766767969797866	4.47297248371694	0.235683664033148	19.0516254455978	26.7366198311113	63.8510463446083	338.87310555766	0.286713434654427	20.5298135748519	100.091210663377	21.2145825863754	33.0305797567112	13.9405162183862
Female	Non-Hispanic White	178	12101703	2017000616570	W	N	13	62	524413815	FMFMF	NA	2	21	615	156	156	13	615	5.06642503607212	3.98761633533778	0.410473357447509	0.0272010934674902	81.2954210065774	162.979777637987	3.68477837881657	4.82941463336407	0.365499253294622	0.808364386401799	0.78484153598317	1.23012777241593	6.44023211583984	7.03015695117865	3.68477837881657	0.348762837951868	17.9519555718683	3.68477837881657	2.15835629466353	10.0162658359095	0.513216650213929	21.0624994637227	122.76222149326	151.911670744366	371.665413641714	0.280489898282469	68.2045383638982	233.07734502563	66.696806957197	87.2680243134229	34.2376170085227
Female	Non-Hispanic White	156	12900901	2014000695242	W	N	0	24	37035	FFM	NA	2	29	616	0	0	0	616	4.0336738583516	1.76654290652981	0.206000616271388	-0.00148109852840765	7.18893848254852	56.3844132685769	1.2795656856994	0.175328434021248	0.0200299380904	0.0449989794359323	0.0153986241097789	0.0447383434170675	0.107890220813146	1.2795656856994	1.12047060322585	0.00407601183314844	0.214990110322238	1.2795656856994	0.138697659485691	1.2795656856994	0.0250078935708805	15.2720263300436	7.24489275155836	9.20094865884553	167.656793928131	0.0146368625055523	4.20299481377391	13.5788368383274	4.06530769332736	5.04909488161058	1.97300991971117
Male	Non-Hispanic White	118	11703205	2018HU0969123	W	N	11	62	911134344	MMMMF	NA	5	17	617	141	141	11	617	5.02302867418891	3.81712984865444	-0.0592128889276219	0.0352712655982377	42.859055790945	157.322830562072	2.05640237417871	3.04624796099333	0.107456713865784	0.757470552459382	0.470904239540809	0.689495974449841	2.37437702580958	5.00486807547827	2.05640237417871	0.137355146739791	7.21596779668816	5.58988120572999	1.28813260721384	5.58988120472071	0.275443352791698	19.841765370973	35.6450160772816	87.269623107942	376.455129376534	0.409410760866046	29.4091167823723	142.624112242866	31.3601400755595	52.6636131773021	19.3535805455414
Female	Non-Hispanic White	47	10603767	2016001301596	W	N	2	22	10302832	FMFFF	40	2	06	618	26	26	2	618	4.48264691582624	2.55226555807183	-0.188513633995887	-0.0239213260823414	10.6307625355545	86.3773587309984	1.65900862947256	0.841141656376399	0.0352354085687993	0.0354656417915766	0.0432906967124823	0.128020545763873	0.27387694969938	1.66672253822309	0.6297383779941	0.0114004632616201	1.41117958145823	1.66672253823348	0.186509321064207	1.66672253823348	0.0693683254837561	17.3378639576619	11.1630357523674	15.7608204468829	230.861651305768	0.0263751337617232	6.87728214821914	26.2139229346203	6.84169631266939	9.30895583193515	3.5388375978591
Male	Non-Hispanic White	156	13200402	2014000952118	W	N	6	10	341356	FMMM	20	3	32	619	72	72	6	619	4.76637799425572	3.08589490712299	-0.223271716553135	-0.0316340611708028	17.507391979449	113.834305786305	2.53244065558657	1.33870750222206	0.0370234323503543	0.186602848820599	0.104609478500685	0.165988109652172	0.658340807467198	2.53213228268238	0.931701066960099	0.0256767012956473	2.59658846893998	2.53262607987305	0.416035456457406	2.53262607987305	0.14964518678164	18.7907823660377	13.3675605575956	33.7624696232041	295.341365000419	0.145138352303561	10.5984198597658	52.8671139125624	11.5047991699684	19.2681899000737	6.87924662220722
Male	Non-Hispanic White	190	13401402	2017000193354	W	N	15	25	15585314	MMFM	NA	3	34	620	191	191	15	620	5.16798559791516	4.26182625286542	-0.00989555017700756	-0.0277152325311035	70.2408958018277	170.761930195595	2.8870365024545	4.18739659006668	0.158253554329237	0.888540416781093	0.439202299662787	0.754423801131995	4.48971712288117	7.83772415986404	2.8870365024545	0.391372193795059	19.7843102497966	2.8870365024545	1.92803337061652	7.84777886271843	0.454959753552053	23.3297567391719	57.8667184674328	131.486138865229	400.324985525855	0.604483182271349	48.0676911092368	216.713230688605	41.7111681153216	75.5927398706959	28.8938211514428
[truncated: 4,380 more rows]
[truncated: 76 more columns]
